# Supplementary material
Source: Research Square preprint supplement (doi:10.21203/rs.3.rs-9812305/v1)
Supplement: Supplementary file 1 [file 015340f1312e5102d5ece8f6.xlsx]

## Sheet: Sheet1
Table 8. Comparison of upregulated genes upon treatments in epithelial cells of uterus
Common genes in "Up by E4low epith.", "Up by E4Hi epith." and "Up by E2 epith."	Common genes in "Up by E2 epith." and "Up by E4Hi epith."	Common genes in "Up by E4low epith." and "Up by E4Hi epith."	Common genes in "Up by E4low epith." and "Up by E2 epith."	Genes specifically upregulated by E2	Genes specifically upregulated by E4low	Genes specifically upregulated by E4Hi
Abca3	Abhd6	Abhd17a	Abi1	Ache	A2m	A4galt
Acer3	Acsl3	Aktip	Adam8	Acot12	Abcb5	Abca7
Acp5	Adgb	Arhgef38	Anxa1	Acot7	Acot11	Ablim3
Acss2	Agpat2	Atp6v0e	Anxa10	Adrb2	Adam10	Ackr3
Actr2	Agtr2	Casp6	Anxa2	Akr1c13	AI661453	Acox2
Ada	Akr1c21	Cbs	Ap5b1	Ankdd1b	Akr1b3	Acvr1b
Adam33	Ankrd22	Chn1	Apol9a	Ankrd13b	Akr1b8	Adgrg2
Add2	Ano5	Chn1os3	Aqp4	Arap2	Alg9	Agmo
Add3	Atp13a5	Cp	Areg	Arl14	Alox15	Ap1b1
Adgrb1	Atp1a2	Ctr9	Arhgef16	Arpc1a	Ammecr1	Ap1g2
Adgre5	Bahd1	Gpaa1	Arpc1b	Atp6v0b	Ap1s2	Aqp8
Adgrf1	C1galt1c1	Grhpr	Avil	Bglap3	Apaf1	Arf3
Adgrg7	C2cd2l	Gys1	B4galt3	Bok	Armc10	Arhgap24
Aga	C77370	Hnmt	Bdnf	Btc	Arpc4	Arhgap27os1
Agpat1	Camk1g	Irak4	Bend4	Cadm4	B2m	Armt1
Agr2	Ccdc124	Isyna1	Bnip3	Capns1	Btbd17	Arpc5l
Ahcyl2	Cd79b	Itgb8	Borcs6	Ceacam2	C4a	Arsj
Ak4	Cdh4	Jagn1	Cacfd1	Celf4	C4b	Atg2a
Akr1a1	Cdipt	Krcc1	Calm3	Cfhr2	Casc1	Atmin
Akr1c18	Cep19	Ldah	Car9	Cflar	Casp3	Atp4a
Alcam	Chil4	Lypla1	Ccdc109b	Clic5	Ccl20	Atp6v1d
Aldh1l2	Chmp1b	Mast1	Ccdc64	Cmas	Cd40	Atp9a
Aldoa	Chmp3	Mgat1	Cd276	Csf3	Cd74	Atxn7l1os2
Alg14	Cpeb4	Mpi	Cdcp1	Dio3	Ces1d	Bmp1
Alg3	Crocc	Msmp	Cdkn2b	Dnase1l1	Chchd4	Bpnt1
Alox5ap	Ctso	Ncln	Cldn23	Dusp4	Clcf1	Cab39l
Alpl	Ddit4	Nme1	Cldn3	Etnppl	Clec2f	Car15
Amica1	Dgkk	Nsdhl	Cldn4	Fat1	Cmpk2	Card19
Ank	Efna4	Nudt19	Cldn7	Flnb	Cnppd1	Caskin2
Ankrd13a	Ehbp1l1	Orai2	Clic1	Frk	Col1a1	Cbx5
Ankrd35	Ehhadh	Pafah2	Csgalnact1	Furin	Col1a2	Ccdc65
Ankrd37	Ehmt2	Pcsk7	Csk	Fxyd4	Col3a1	Ccdc71
Ankrd46	Eva1a	Pde6h	Csnk1e	Fzr1	Col6a4	Cdca7
Aoc1	F8a	Pdia4	Ctsl	Galnt6os	Ctsd	Cdk18
Ap1m2	Fbxl19	Plcb3	Ctxn1	Gbp8	Cxcl14	Chil5
Ap1s1	Gba2	Plch1	Cxcl1	Gbp9	Daxx	Chn1os1
Ap2s1	Gbp4	Plpp6	Cxcl3	Grin1	Ddx58	Cntn2
Ap3s1	Gch1	Prdx3	Cyc1	Grin1os	Dgkz	Cotl1
Aph1a	Gltp	Ptpn5	Ddx60	H2-D1	Dhrs7	Cox14
Apobec1	Gmip	Ptpru	Dkkl1	Hagh	Dll4	Cpsf3
Apobec2	Gng5	Qrsl1	Dnah10	Higd1a	Dmbt1	Creb3
Apobr	Hmg20b	Rab3d	Dsg2	Hist1h2bc	Dnpep	Csf1r
Apol7a	Itgb4	Ralbp1	Eepd1	Hist1h4i	Dohh	Cyb561a3
Aqp5	Kbtbd8	Rbbp7	Efnb1	Hspa1b	Dxo	Cyb561d2
Arap1	Kcnk12	Reep4	Ephb2	Ifi203-ps	Fbxw17	Cyb5rl
Arg1	Khdc1a	Serp1	Ereg	Igsf9b	Fdps	Cyp3a57
Arhgap27	Lamtor2	Serpinf1	Fabp4	Insl3	Ffar4	Dbpht2
Arhgap27os2	Laptm5	Sh3yl1	Galnt6	Itga2	Frmd8	Dclre1b
Arhgap32	Lor	Slc16a6	Gbp3	Lamc2	Fut2	Dennd2d
Arhgap40	Lypd8	Slc25a5	Gcnt3	Lemd1	Gabrp	Dgkg
Arpc3	Lzts1	Slc35f6	Glrx	Lipo3	Galnt10	Dlg5
Arpc5	Map6	Spns3	Gpr27	Llgl2	Galnt7	Dnm2
Arsa	Me1	Ssbp4	Gprc5a	Lrrc36	Gatsl2	Dok7
Ass1	Mfap3l	Ssx2ip	Gsdmd	Lrrc8b	Gbp6	Dolk
Atg9a	Mrgprb2	Suclg1	Gtpbp2	Mad2l1bp	Gfra1	Dsel
Atg9b	Mrpl43	Surf4	H2-K1	Manba	Gyg	Eea1
Atp10b	Ndufa3	Swsap1	Hcar2	Mbnl3	H2-Bl	Efnb3
Atp13a4	Oxct2a	Tbl3	Hmgcll1	Mdga1	H2-K2	Elovl5
Atp1b3	Pde1c	Tfrc	Ick	Mea1	H2-Q1	Emb
Atp2c2	Pigyl	Thap6	Ifi204	Mid2	H2-Q10	Erlin2
Atp6ap1	Pla2g15	Tmprss6	Ifi207	Mir22hg	H2-Q5	Exoc8
Atp6v0a2	Pnp	Tpgs1	Ifi211	Mmp23	H2-T23	F5
Atp6v0a4	Ppp1r13l	Ttc39a	Ifi27	Mrgbp	Heatr5a	Fahd1
Atp6v1b2	Prkcdbp	Ttc39b	Ifit1bl1	mt-Ts2	Hey1	Fth1
Atp6v1e1	Psmd10	Yipf3	Ikbke	Nav3	Hmmr	Gal
B3galt5	Ptpn18		Il18rap	Ndufa4	Hpse	Galns
B3gnt3	Rassf7		Il23a	Nectin4	Hsd11b2	Gfra4
B4galnt1	Rph3al		Iqgap2	Net1	Htra1	Gjb1
Bace2	Scgb1c1		Irf7	Numb	Htra4	Gpr108
Bak1	Sctr		Isg15	Olr1	Ifi35	Gpx3
Basp1	Sh3d19		Kcnc2	Pcsk5	Ifi47	Grb7
Bcar3	Slco5a1		Knstrn	Perp	Ifih1	Greb1
Bcat1	Spry4		Krt16	Phlda1	Ifit1	Hddc2
Bcl2l15	Strc		Krt25	Plekha8	Ifit3	Hexb
Bcl9	Tax1bp3		Lad1	Plekhg1	Il17c	Hmgcl
Bdh1	Tnfsf13os		Lama3	Pnp2	Il24	Hp
Bhlhe41	Trex2		Las1l	Pola2	Il3ra	Hr
Bmp8a	Ttc39c		Lpin2	Polr2f	Il4ra	Hs1bp3
Bmyc	Tubg1		Ly6a	Ppp1r14b	Itpr3os	Htatip2
Brms1	Zdhhc12		Ly6e	Psca	Kdelr1	Iah1
Bsg	Zfp92		Mab21l3	Rgs19	Klrg2	Icmt
Bspry			Mall	Rnf208	Krtcap3	Igkv12-89
Bst2			Mapk11	Rps4l	Lamtor5	Ikbkg
C1galt1			Mapk6	S100a9	Lap3	Il20rb
C2			Metrnl	Scin	Lgals12	Itpk1
C3			Mfsd2a	Serpina1d	Lmo2	Jdp2
C4bp			Mgat4b	Slc23a1	Lrig1	Jkamp
Cacna2d3			Mir31	Slc4a11	Lrp2bp	Kifc3
Capg			Mir7677	Slc7a6os	Lrrc59	Klk1b21
Capn5			Misp	Smg7	Lsr	Liph
Car12			Mlkl	Smim22	Macc1	Lnx2
Car2			Mlx	Srd5a1	Malt1	Lrp2
Car5b			Mmp13	Stom	Man2b1	Lzts2
Card10			Mogat1	Tlcd2	Map3k9	Mdfic
Casp7			Myo1g	Tmsb4x	Mfsd9	Mfap2
Cblc			N4bp1	Tnk2	Mir3109	Mfsd5
Cbr2			Ncf2	Tnk2os	Mir5107	Mid1ip1
Cbr3			Ndrg1	Trim12c	Mir704	Mir6925
Cbr4			Nfkbid	Uchl3	Mlec	Mkks
Ccdc71l			Nipal1	Uqcc2	Muc5ac	Mlycd
Ccdc88b			Nod2	Utf1	Mx2	Mospd1
Ccl28			Nupr1	Vstm5	Naglu	Mospd3
Ccng2			Oas1g	Wdr47	Nhsl1	Mpzl2
Cd14			Oasl2	Wnt4	Nipsnap3b	Mrfap1
Cd24a			Orai1	Xlr4a	Nol4l	Msantd1
Cd81			Otud3	Xlr4c	Nox1	Mtmr2
Cda			Ovol1	Ypel2	Nr1i3	Mvb12a
Cdc42bpg			Paox	Zdhhc21	Opn3	Myo18a
Cdc42ep2			Paqr5	Zfp54	Parp12	Myot
Cdc42se1			Pdgfb		Parp14	Ndor1
Ces2b			Pdia5		Parp9	Nrbp2
Cfb			Pdlim7		Pcbp3	Nudcd2
Cfh			Peg10		Plod1	Nudt18
Cfi			Pet100		Plxnb2	Nudt22
Cftr			Phf11d		Pmel	Nxt1
Chac2			Pik3r5		Ppp1r14d	Os9
Chil1			Pkm		Prickle3	Osbpl1a
Chmp1a			Pkp3		Prkaa1	Osbpl7
Chmp5			Plp2		Prkcsh	Ovgp1
Chn2			Pparg		Psmb10	Oxct1
Chp1			Ppif		Psmb2	Oxsm
Chst11			Prelid1		Psmb9	P2ry2
Chst7			Prr13		Psmd8	Pak3
Chst8			Prss32		Psme1	Pde4c
Cib1			Psmb8		Ptgs2	Penk
Cideb			Psme2		Ptpro	Pex26
Cipc			Ptafr		Rab6b	Pgpep1
Ckmt1			Ptpre		Rab7b	Phyhip
Clca1			R3hdm4		Ripk3	Pigo
Clca3a1			Reep5		Rnf213	Pik3c2g
Clca3a2			Ret		Rp2	Pkn1
Clca3b			Rhoc		Rps3a3	Pknox2
Clcn2			Rhof		Rps6ka1	Plekha3
Cldn2			Rhpn2		Rsad2	Plekha7
Clint1			Rnasel		Sdhd	Plekhm1
Clip2			Rtp4		Sectm1b	Polr2g
Clptm1l			Scnn1b		Serpina3g	Pon3
Cmbl			Sema3a		Serpina3h	Ppp2r2c
Cmpk1			Sema4d		Slc34a2	Prol1
Coro1b			Serpina1a		Slc36a1	Ptges2
Coro2a			Serpina1b		Slfn5	Ptprv
Cox5a			Serpina1c		Slfn8	R3hcc1l
Cox8a			Serpinb5		Snx5	R74862
Cpn1			Sh2d5		Stat1	Rabif
Crabp2			Skiv2l		Stat2	Rasal1
Crlf1			Sla2		Steap2	Rassf5
Csf2			Slc25a45		Stk38	Rbfa
Ctsa			Slc26a9		Stra6l	Rbm47
Ctsc			Slc2a4		Tap2	Reep6
Ctse			Slc2a6		Tcirg1	Rnasek
Ctsh			Slc39a1		Tkfc	Rnf126
Ctss			Slc39a6		Tlr2	Rnf181
Cxcl17			Slc6a14		Tmbim6	Sco1
Cxcl2			Slfn4		Tmco1	Sdr42e1
Cyba			Slit2		Tnfsf10	Secisbp2l
Cyp21a1			Specc1		Tnik	Sema3f
Cyp2j6			Sprr2a1		Tomm40l	Sema4a
Cyp3a13			Sprr2a2		Tomm5	Sephs2
Cyth4			Sprr2b		Tor1aip2	Serinc5
Dap			Ssr2		Tor3a	Setx
Dbnl			St14		Trim5	Sgpp1
Dcxr			Stap2		Trp53i11	Sgsh
Ddost			Steap1		Trpm6	Sh3tc2
Ddx39			Stx1a		Trpv5	Shpk
Dgat2			Sulf2		Tspan17	Slc2a1
Dhcr24			Tead4		Tspo	Slc2a12
Dhrs1			Tmsb10		Ttyh2	Slc35a1
Dhrs9			Trim15		Ubxn2b	Slc43a2
Dhx32			Trim25		Ufsp2	Smim20
Dhx58			Trim27		Xaf1	Stard5
Dmrta1			Trim30a		Zbp1	Stxbp2
Dnase2a			Trim30d			Sypl
Dnase2b			Trim34a			Syt6
Dok1			Trip10			Thnsl2
Dolpp1			Tspan8			Tm2d1
Dpagt1			Unc13a			Tmbim4
Dpp3			Unc5b			Tmc7
Dpy19l1			Usp18			Tmc8
Dram2			Xlr4b			Tmco3
Dsc2			Zc3h12a			Tmod1
Dscam			Zc3hav1			Trabd
Dtx3l			Zdhhc15			Trpv4
Dusp14			Zfp809			Tspo2
Dusp22						Txndc15
Ebp						Txnl4b
Egln1						Tysnd1
Egln3						Tyw1
Ehd1						Uba1
Eif2ak2						Ubxn10
Elf3						Ufc1
Elfn1						Usp4
Elk3						Vapb
Endod1						Vipr1
Eno1						Vps37b
Eno1b						Wipi1
Enpp3						Wnt5a
Eps8						Zcchc9
Epsti1						Zdhhc9
Ergic3						Zfp251
Ero1l						Zkscan2
Esrra						Zmat3
Fabp5						Zmiz1
Fbln1						Zmynd8
Fbln7
Fcgbp
Fcna
Fer1l4
Fes
Fgd3
Fgfrl1
Fkbp11
Fndc10
Foxa1
Fuca1
Fuca2
Fuom
Fxyd3
G6pdx
Gale
Galnt12
Galnt3
Galnt4
Gapdh
Gba
Gda
Gdpd1
Gdpd5
Gfpt1
Gipc1
Gjb2
Glb1
Glis3
Glmp
Gmds
Gmfg
Gnb2
Gng12
Gng4
Golga7
Golm1
Gpd1
Gpd1l
Gpd2
Gpx1
Grn
Gsr
Gsta3
Gsto1
Gsto2
Gstt2
Gusb
Gvin1
H2afj
H2-Q2
H6pd
Hes6
Hgfac
Hpcal1
Hs3st1
Hsd17b11
Hsd17b2
Ifi202b
Ifi203
Ifi44
Ifne
Ifngr2
Igsf8
Il1a
Il1f6
Il1f8
Il1f9
Il1rn
Il5ra
Inhbb
Inpp5d
Irx3
Itgam
Itpripl2
Kap
Kcnk6
Kcnn4
Klhl5
Kndc1
Krt12
Krt19
Krt20
Krt6b
Krt7
Krt84
Krt87
Lamb1
Lamb3
Lasp1
Lcn2
Ldha
Leng1
Leprot
Lgals3bp
Lgals9
Lgi4
Lif
Lig4
Loxl4
Lpar1
Lpcat4
Lpo
Lrat
Lrg1
Lrmp
Lrp10
Lrrc20
Lrrc26
Lrtm1
Ltf
Lvrn
Ly96
Lyn
M6pr
Mal2
Man2b2
Mansc1
Map2k1
Mapk13
March4
Mboat2
Mbp
Mdp1
Meis3
Melk
Mesdc1
Mfsd12
Mfsd4a
Mgat4a
Mgat4c
Mgst3
Micall2
Mien1
Mif
Mir1668
Mir6418
Mir686
Mir6978
Mir7678
Mkrn2os
Mlph
Mmp7
Mndal
Mocos
Mogat2
Mon1b
Mpzl3
Mrgprb3
Mroh3
Mrpl34
Mrpl36
Mst1r
Muc1
Muc13
Muc20
Muc4
Mx1
Mxd1
Myb
Mycn
Myh14
Naaa
Nadk
Naga
Naip1
Naip2
Naip3
Naip5
Naip6
Nat2
Natd1
Nbeal2
Ncoa7
Ncstn
Ndufa11
Ndufv3
Nipal2
Nlrc4
Nlrp6
Nlrx1
Nmnat3
Noxo1
Nrtn
Ntn1
Ntn5
Nucb1
Oas1a
Oas2
Oas3
Oasl1
Oit1
Olfm1
Omp
Ostc
Ostf1
Otop1
Otub2
Padi1
Padi2
Padi3
Padi4
Pag1
Papln
Parp8
Pcdh1
Pcdh17
Pcp4l1
Pcsk6
Pcyt1b
Pde7b
Pde9a
Pdzk1ip1
Pea15a
Pear1
Pepd
Pfkl
Pgam1
Pgd
Pgk1
Pglyrp1
Pgm2
Pgp
Pigr
Pigx
Pik3c3
Pik3cg
Pik3r3
Pip4k2c
Pip5k1c
Pla2g2e
Plac8
Plau
Pld3
Plekha2
Plekhb2
Plet1
Plet1os
Plin2
Plpp2
Pls1
Pof1b
Polk
Polm
Ppdpf
Ppm1j
Ppp1r1b
Ppp1r3b
Ppp2r5b
Prap1
Prdx5
Prkar2b
Prom1
Psmb5
Ptprh
Ptprs
Pycr2
Pyroxd2
Qsox1
Rab1b
Rab25
Rab27b
Rab32
Rap1gap2
Rap2b
Rapgefl1
Rasa4
Rasgrp1
Rbp1
Rdh10
Rflnb
Rgp1
Rhbdl2
Rinl
Rnaset2a
Rnf128
Rnf180
Rnf183
Rnf186
Rnf5
Rnpep
Rpn2
Rprd1b
Rps6ka4
Samd12
Samd9l
Sar1b
Sat1
Scamp2
Scamp5
Scgb3a1
Scml4
Scn4a
Sdcbp2
Sdf2l1
Sec1
Sec11c
Sec61b
Sel1l3
Selplg
2005-09-01
Serinc2
Serpina1e
Serpina9
Serpinb1a
Sftpd
Sgsm1
Sgsm3
Sh2d4b
Sh3bgrl2
Sh3bgrl3
Sh3tc1
Shisa2
Shisa5
Shkbp1
Skint6
Slc16a14
Slc16a3
Slc18a1
Slc22a18
Slc23a4
Slc25a24
Slc26a1
Slc26a4
Slc27a2
Slc28a3
Slc33a1
Slc35c1
Slc35g1
Slc37a1
Slc39a11
Slc39a2
Slc39a4
Slc39a8
Slc40a1
Slc44a4
Slc45a3
Slc4a4
Slc5a1
Slc5a8
Slc5a9
Slc9a3r1
Slco4a1
Slfn2
Slpi
Smim24
Smpd3
Smpdl3a
Snx7
Spink12
Spint1
Spns2
Spp1
Sppl2a
Sprr2a3
Sprr2d
Sprr2e
Sprr2f
Sprr2i
Ssr4
Ssu72
Stc2
Stk10
Stk32a
Syk
Syt16
Syt8
Sytl5
Taldo1
Tbc1d10b
Tbc1d13
Tbc1d30
Tc2n
Tcn2
Tex2
Tex261
Tgm2
Tjp3
Tlr1
Tlr3
Tmc4
Tmc5
Tmc6
Tmcc3
Tmed3
Tmed9
Tmprss11a
Tmprss11b
Tmprss11d
Tmprss11e
Tmprss11g
Tmprss4
Tnf
Tnfaip3
Tnfrsf23
Tnfrsf8
Tnip3
Tnni2
Tnxa
Tor2a
Tor4a
Tpi1
Tprn
Tradd
Traf1
Trappc1
Trib2
Trim40
Trim6
Triobp
Trp53inp2
Trpv6
Tspan1
Tspan14
Tspan33
Tssk6
Tsta3
Ttc9
Tuba8
Ugt1a1
Ugt1a10
Ugt1a2
Ugt1a5
Ugt1a6a
Ugt1a6b
Ugt1a7c
Ugt1a8
Ugt1a9
Unc5cl
Unc93b1
Uox
Upk3bl
Urah
Vamp7
Vamp8
Vav1
Wbp1l
Wdr72
Wdr81
Wfdc1
Wfdc18
Wfs1
Wnt7b
Xpnpep1
Zbtb18
Zdhhc14
Zfand2a
Zfp946
