# Supplementary material
Source: Research Square preprint supplement (doi:10.21203/rs.3.rs-9812305/v1)
Supplement: Supplementary file 2 [file 14b0640b5f9a3036ba37d1a4.xlsx]

## Sheet: Sheet1
Table 3. Comparison of upregulated genes upon treatments in ER+LC
Common genes in "Up by E4low ER+LC", "Up by E4Hi ER+LC" and "Up by E2 ER+LC"	Common genes in "Up by E2 ER+LC" and "Up by E4Hi ER+LC"	Common genes in "Up by E4low ER+LC" and "Up by E4Hi ER+LC"	Common genes in "Up by E4low ER+LC" and "Up by E2 ER+LC"	Genes specifically upregulated by E2	Genes specifically upregulated by E4low	Genes specifically upregulated by E4Hi
Abhd12	Acads	Angptl4	Abhd16b	A4galt	A3galt2	Ctsr
Adh7	Ammecr1	Chd9	Acsl3	Abhd5	Abca4	Ddit4
Adrb2	Anxa6	Mdga2	Agxt2	Acot1	Abcc3	H2-Ob
Agps	Asb5	Tspan13	Alk	Adh1	Acan	Pdlim2
Alox15	Aspa		Ampd1	Afap1l1	Acer3	Slc6a9
Anln	Atp1b3		Anxa3	Ak2	Ache
Aoc1	Atp2a3		Arap2	Akr1b3	Acot9
Aox2	Bpifc		Arhgap26	Aldh3a1	Adgre5
Apc	Ccna2		Bnipl	Alox12	Adgrl2
Aqp5	Cdc20		Ccdc162	Anpep	Adipor2
Areg	Cdca3		Ccdc71l	Anxa8	Aldh3a2
Atg9b	Cenpf		Cd200	Arg1	Als2cl
Atp13a3	Ctxn1		Chek1	Arhgap11a	Amica1
Bcar3	Defb1		Cntn4	Arhgap19	Amn1
Bdnf	Dhcr24		Cyp2u1	Arhgap24	Ano7
Bmp3	Dpep3		Cyp4f39	Armcx2	Apol8
Bnc1	Folr2		Dhx40	Asnsd1	Apol9b
Bst2	Gpd2		Dusp10	Aspm	Aqp3
Btc	Gsto1		Ebp	Atad2	Arfgap3
Bzw1	Hdac9		Ect2	Atp11b	Arhgap22
Cd24a	Hells		Edn1	Axdnd1	Arhgap27os3
Cers6	Hist1h1a		Epha7	Bard1	Arhgap42
Chst8	Hist1h2ai		Eps8l1	Bid	Arid3b
Chsy3	Hist1h2ak		Esrrb	Birc5	Arv1
Clca1	Hist1h2bb		Gas2l3	Brca1	Baiap2
Coq3	Hist1h3b		Gprc5a	Brip1	Basp1
Crbn	Hist1h3d		Gsr	Btbd19	Bcl6
Ctns	Hmmr		Gtf2h2	Btbd3	Btg3
Ctr9	Igfals		Iigp1	Bub1	C1galt1
Cxcl15	Iqgap3		Il33	Bub1b	Casc1
Cyp3a57	Irf4		Itga2	Cabyr	Catsper4
Ddx28	Ivl		Itgb4	Cbr2	Cbs
Dgka	Kcnf1		Itgb6	Ccdc124	Ccdc138
Dgki	Kif15		Kif16b	Ccl5	Ccdc68
Diaph3	Krt79		Krt19	Ccnb1	Ccdc7a
Dkkl1	Lgals7		Krt6a	Ccnb2	Ccng2
Dmbt1	Mboat2		Krt6b	Ccng1	Ccser1
Dnah11	Metrn		Krt80	Cd109	Cd5
Dpep2	Mir7678		Lgals3	Cd320	Cdkl2
Dsc2	Nusap1		Lypd1	Cdc45	Cep192
Dus2	Padi3		Magt1	Cdc6	Cep83
Dusp22	Padi4		Mal	Cdca2	Cfap61
Eif4ebp1	Papln		Map4	Cdca7l	Chrna9
Enah	Psat1		March10	Cdca8	Clip1
Epgn	Racgap1		Mcm10	Cdk1	Cmpk1
Ern1	Rasd1		Me1	Cenpa	Cpeb2
Ezr	Rnf223		Milr1	Cenpe	Cpt1b
F3	Sftpd		Mir8114	Cenpi	Crebrf
Faim2	Slc12a3		Mtfr2	Cep55	Ctbs
Fermt1	Slc5a8		Mtss1	Cep70	Cxadr
Fmnl2	Slpi		Ncapg2	Chsy1	Cyb5d2
Foxq1	Spcs3		Neb	Cit	Cyld
G6pdx	Tmprss11f		Ngly1	Ckap2	Dars2
Galnt9	Trabd2b		Nipal1	Cks1b	Derl2
Gatb	Trib3		Oas3	Clspn	Dfna5
Ggt1	Tsc22d3		Perp	Cmpk2	Dhx32
Glul	Ube2c		Pgd	Cntnap1	Diaph2
Gng12	Zfp53		Plac8	Col17a1	Dnah12
Gpr155			Plau	Col4a4	Dnah6
Gpr39			Pls1	Col6a3	Dnah7b
Gpx3			Pmaip1	Col7a1	Dnase1l3
Greb1			Prc1	Cpeb1	Dscam
Hcar2			Prom1	Cpsf3l	Dsg2
Hist1h1b			Rap2b	Crabp2	Dyrk1b
Hist1h2bg			Rasgrf1	Cryz	Efcab8
Hist1h3c			Rprd1b	Cxcl10	Ehf
Hist1h3i			Rrm2	Cxcl5	Elovl7
Hp			Scin	Cyp51	Eml6
Ido1			Scn4a	Dapl1	Epn2
Igbp1			Sh2d4b	Dck	Esyt2
Igsf5			Slc1a4	Ddit4l	Fbxo32
Il5ra			Slc22a23	Dio2	Fbxw10
Itpripl2			Slc4a11	Dlgap5	Fgf13
Kif4			Slc5a3	Dpy30	Fsd1
Kntc1			Slc5a6	Dsg3	Fxyd4
Krt16			Smox	Dtl	Fzd10
Krt4			Spef2	Dut	Gdap1l1
Krt77			Stc2	E2f8	Gfod1
Krt78			Tacc2	Efnb2	Gjb4
Lama5			Tap2	Emb	Glis1
Lamc2			Tapt1	Emc6	Gnrh1
Lcorl			Tbc1d7	Ercc6l	Greb1l
Lpcat4			Tcf12	Ero1l	Gt(ROSA)26Sor
Ltbp1			Teddm2	Esco2	Gucy2g
Mad2l1			Tmcc3	Espl1	Hapln3
Memo1			Tnfrsf23	Esyt3	Hcfc2
Mettl7a1			Tnip3	F5	Hist1h2bc
Mfsd2a			Tns4	Fanca	Hmgcl
Mgat3			Trim72	Fancd2	Hspa4l
Mgat5			Trpv3	Fat2	Hspbap1
Mlec			Ttc39c	Fat3	Htr4
Mras			Tuft1	Fdps	Igip
Mthfd2			Uhrf1	Fen1	Ikbkg
Muc13			Unc5b	Fgd3	Il18bp
Mycl			Zfp52	Fkbp11	Il18r1
Ncapg			Zfp948	Flnc	Il18rap
Nmnat2				Foxm1	Il6ra
Nuak1				Furin	Inf2
P2ry4				Fut8	Insig2
P4ha2				Fut9	Iqcg
Padi2				Gabrp	Itgav
Pcp4				Gale	Kcnh7
Pcx				Galnt1	Kcnma1
Pgr				Gapdh	Kctd9
Phactr1				Gbp6	Kif5c
Podxl				Gdpd2	Klf3
Porcn				Gfra1	Klf6
Ptpn5				Ghr	Klhl24
Ranbp17				Glt28d2	Krcc1
Rbm20				Gmnn	Ktn1
Rnf207				Gpat4	Large1
Ryr3				Gpr87	Las1l
S100a14				Grm8	Lat2
Sgsm3				H2afx	Liph
Sh3d19				H2afz	Lmo7
Shpk				Hacd2	Loxl4
Slc2a3				Hddc2	Lrch3
Slc5a5				Hint1	Lrrc8dos
Slc7a5				Hist1h1d	Lrrtm2
Snx13				Hist1h2ab	Ly6a
Spock1				Hist1h2ac	Ly6d
Sprr1a				Hist1h2ae	Ly6g6e
Sprr2a3				Hist1h2af	Macc1
Sprr2f				Hist1h2al	Manba
Stat5a				Hist1h2bh	Map2k4
Stk32a				Hist1h2bj	Map4k3
Syn2				Hist1h2bl	Matn4
Syt8				Hist1h2bm	Mboat1
Sytl5				Hist1h2bn	Mcu
Tax1bp3				Hist1h3a	Mgst2
Tenm1				Hist1h3e	Mmp25
Tgm2				Hist1h3f	Mroh2a
Timp4				Hist1h3h	Mroh3
Tmed3				Hist1h4b	Msmo1
Tmeff1				Hist1h4j	Mss51
Tmprss11a				Hist1h4k	Mtmr14
Tmprss11e				Hist2h2bb	Muc16
Top2a				Hist2h3b	Mum1l1
Tph1				Hist2h4	Nabp1
Trnt1				Hk2	Naip2
Trp53i11				Iars	Nav2
Ttll7				Idi1	Ndnf
Twnk				Ier3	Nedd4l
Unc119b				Ifi202b	Ngf
Usp18				Ifit1	Nipal2
Wnt5a				Igsf9b	Nudt7
				Il1r2	Nupr1
				Il4ra	Obfc1
				Incenp	Olfr920
				Irs1	Olfr921
				Isyna1	Omp
				Itih2	Otud7b
				Jdp2	Pak3
				Kcne2	Perm1
				Khdrbs3	Piezo2
				Kif11	Pim2
				Kif14	Pla2g4b
				Kif20a	Plcd3
				Kif20b	Plcxd2
				Kif22	Plekhh1
				Kif23	Plekhs1
				Kif2c	Polg2
				Klk6	Ppp1r10
				Knl1	Ppp3ca
				Knstrn	Prkd1
				Krt15	Prl2c3
				Lamb3	Prom2
				Lancl1	Prss22
				Ldha	Ptrh2
				Ldoc1	Qrich2
				Lig1	Rad18
				Limk2	Rb1cc1
				Lrrc75b	Rbm44
				Ly6g6c	Rdh10
				Lztr1	Rgs20
				Lzts2	Rhbdl2
				Map1lc3b	Rims3
				Mastl	Rlbp1
				Mb21d1	Rmnd5a
				Mb21d2	Rps3a3
				Mcm2	Sdcbp2
				Mcm3	Sema7a
				Mcm5	Serpinc1
				Mcm7	Setx
				Med24	Slc12a2
				Melk	Slc23a1
				Mex3b	Slc25a24
				Mif	Slc25a48
				Mir5114	Slmo1
				Mis18bp1	Spata1
				Mki67	Spin4
				Mlkl	Sptb
				Mms22l	Sptbn5
				Mpp1	Sptlc3
				Mrpl43	Srsf12
				Mrpl45	Stard13
				Mrps6	Strip2
				Msrb2	Stx11
				Muc5b	Sytl2
				Mx1	Tbc1d1
				Myh14	Tcf24
				Myo5c	Tec
				Ncaph	Thap6
				Ndc80	Tktl1
				Nek2	Tmcc3os
				Nfxl1	Tnf
				Nkain1	Tox2
				Nme1	Trp53cor1
				Nop56	Trp53inp1
				Nrk	Trpc6
				Nudcd2	Ttc21a
				Nudt5	Txk
				Nuf2	Ubd
				Nup37	Upk2
				Nup43	Vtcn1
				Nup93	Wdr72
				Ostc	Wfdc2
				Ovol1	Zbtb7c
				P4hb	Zc3h7a
				Pard6g	Zdhhc21
				Pbk	Zfand2a
				Pdk1	Zfp119a
				Pdlim4	Zfp456
				Pdzd11	Zfp711
				Pdzd7
				Penk
				Pgam1
				Pkd1l1
				Pknox2
				Pla2g4c
				Plcd1
				Plekhh3
				Plk1
				Plscr4
				Pole
				Ppdpf
				Ppm1j
				Ppp1r14c
				Prim1
				Prkce
				Prkd3
				Prr11
				Prr32
				Prune2
				Psen2
				Psrc1
				Pthlh
				Ptpn13
				Pttg1
				Qsox1
				Rab32
				Rapgefl1
				Rbl1
				Rgs2
				Rnf7
				Rrm1
				Rsad2
				Rufy3
				Samd12
				Samhd1
				Sar1b
				Scd2
				Scnn1g
				Sdc1
				Sec61b
				Selenos
				Sgol2a
				Shcbp1
				Slc16a1
				Slc1a2
				Slc26a2
				Slc34a2
				Slfn9
				Smc2
				Smgc
				Snap25
				Sncaip
				Snx5
				Soat1
				Socs2
				Spag5
				Spc25
				Ssu72
				Stil
				Stmn1
				Susd2
				Syt6
				Tacc3
				Taf1d
				Tfrc
				Tgfb3
				Thsd4
				Ticrr
				Timm8b
				Tmprss11g
				Tnfrsf11b
				Tnfrsf19
				Tnfsf10
				Tnnc1
				Tpd52l1
				Tpx2
				Trim59
				Trp63
				Ttc13
				Ttc36
				Ttk
				Tuba8
				Tubg1
				Tyms
				Utp14b
				Vmn1r39
				Vstm2b
				Wasf1
				Wdfy2
				Wfdc18
				Wisp2
				Zbtb8a
				Zbtb8b
				Zfp618
				Znhit6
				Zwilch
				Zxdc
