# Supplementary material
Source: Research Square preprint supplement (doi:10.21203/rs.3.rs-9812305/v1)
Supplement: Supplementary file 3 [file 2bf6fc2274f8d865349f3bce.xlsx]

## Sheet: Sheet1
Table 10. List of upregulated genes in vagina
Upregulated genes upon E2 in epith. Of vagina			Upregulated genes upon E4low in epith. Of vagina			Upregulated genes upon E4Hi in epith. Of vagina			Upregulated genes upon E2 in fibro. Of vagina			Upregulated genes upon E4low in fibro. Of vagina			Upregulated genes upon E4Hi in fibro. Of vagina
Gene-ID	Gene-Name	Fold change E2/OVX	Gene-ID	Gene-Name	Fold change E4low/OVX	Gene-ID	Gene-Name	Fold change E4Hi/OVX	Gene-ID	Gene-Name	Fold change E2/OVX	Gene-ID	Gene-Name	Fold change E4low/OVX	Gene-ID	Gene-Name	Fold change E4Hi/OVX
ENSMUSG00000000028	Cdc45	4.32571	ENSMUSG00000000028	Cdc45	3.74857	ENSMUSG00000000028	Cdc45	4.64571	ENSMUSG00000000120	Ngfr	33.4286	ENSMUSG00000000120	Ngfr	13.8272	ENSMUSG00000000120	Ngfr	27.5876
ENSMUSG00000000031	H19	25.8128	ENSMUSG00000000031	H19	11.4975	ENSMUSG00000000031	H19	16.2759	ENSMUSG00000001020	S100a4	14.9098	ENSMUSG00000000223	Drp2	2.19497	ENSMUSG00000000223	Drp2	2.12421
ENSMUSG00000000058	Cav2	2.8405	ENSMUSG00000000058	Cav2	2.10256	ENSMUSG00000000058	Cav2	2.89668	ENSMUSG00000001025	S100a6	3.27379	ENSMUSG00000000440	Pparg	3.85366	ENSMUSG00000001020	S100a4	4.27808
ENSMUSG00000000088	Cox5a	2.33316	ENSMUSG00000000125	Wnt3	7.07576	ENSMUSG00000000078	Klf6	2.69367	ENSMUSG00000001027	Scn4a	21.2317	ENSMUSG00000001020	S100a4	4.76427	ENSMUSG00000001119	Col6a1	2.39366
ENSMUSG00000000295	Hddc2	2.21471	ENSMUSG00000000308	Ckmt1	3.63474	ENSMUSG00000000088	Cox5a	2.0627	ENSMUSG00000001029	Icam2	5.19403	ENSMUSG00000001027	Scn4a	11.7302	ENSMUSG00000001228	Uhrf1	3.36782
ENSMUSG00000000308	Ckmt1	3.2891	ENSMUSG00000000489	Pdgfb	2.0754	ENSMUSG00000000184	Ccnd2	2.06553	ENSMUSG00000001119	Col6a1	2.12552	ENSMUSG00000001029	Icam2	3.83582	ENSMUSG00000001240	Ramp2	3.91371
ENSMUSG00000000420	Galnt1	3.04623	ENSMUSG00000000552	Zfp385a	3.53467	ENSMUSG00000000308	Ckmt1	3.0041	ENSMUSG00000001131	Timp1	4.70833	ENSMUSG00000001240	Ramp2	5.54343	ENSMUSG00000001741	Il16	2.81681
ENSMUSG00000000489	Pdgfb	2.43254	ENSMUSG00000000555	Itga5	2.07815	ENSMUSG00000000420	Galnt1	2.4841	ENSMUSG00000001240	Ramp2	4.31371	ENSMUSG00000001741	Il16	3.19985	ENSMUSG00000001870	Ltbp1	2.89719
ENSMUSG00000000552	Zfp385a	2.97072	ENSMUSG00000000751	Rpa1	2.30759	ENSMUSG00000000489	Pdgfb	2.62302	ENSMUSG00000001300	Efnb2	2.05196	ENSMUSG00000001870	Ltbp1	2.66317	ENSMUSG00000002014	Ssr4	3.31085
ENSMUSG00000000563	Atp5f1	2.24811	ENSMUSG00000001228	Uhrf1	6.43073	ENSMUSG00000000552	Zfp385a	2.64253	ENSMUSG00000001403	Ube2c	6.66667	ENSMUSG00000002014	Ssr4	2.40991	ENSMUSG00000002289	Angptl4	3.44758
ENSMUSG00000000751	Rpa1	2.48602	ENSMUSG00000001348	Acp5	3.35725	ENSMUSG00000000751	Rpa1	2.34554	ENSMUSG00000001656	Hoxc11	2.74419	ENSMUSG00000002289	Angptl4	4.1828	ENSMUSG00000002308	Cd320	4.00893
ENSMUSG00000001020	S100a4	2.83446	ENSMUSG00000001403	Ube2c	25.8036	ENSMUSG00000001020	S100a4	2.66554	ENSMUSG00000001741	Il16	2.05526	ENSMUSG00000002308	Cd320	3.71429	ENSMUSG00000002346	Slc25a42	3.22293
ENSMUSG00000001025	S100a6	2.0598	ENSMUSG00000001416	Cct3	2.186	ENSMUSG00000001056	Nhp2	2.43523	ENSMUSG00000001870	Ltbp1	2.24832	ENSMUSG00000002346	Slc25a42	3.03397	ENSMUSG00000002550	Uck1	4.55541
ENSMUSG00000001056	Nhp2	3.12107	ENSMUSG00000001435	Col18a1	6.51622	ENSMUSG00000001156	Mxd1	2.2958	ENSMUSG00000002014	Ssr4	6.23393	ENSMUSG00000002550	Uck1	3.85919	ENSMUSG00000002603	Tgfb1	2.7131
ENSMUSG00000001175	Calm1	2.27334	ENSMUSG00000001467	Cyp51	2.38406	ENSMUSG00000001228	Uhrf1	6.95718	ENSMUSG00000002233	Rhoc	2.4154	ENSMUSG00000002847	Pla1a	3.65976	ENSMUSG00000002847	Pla1a	3.46078
ENSMUSG00000001228	Uhrf1	6.44836	ENSMUSG00000001507	Itga3	2.11438	ENSMUSG00000001348	Acp5	3.24964	ENSMUSG00000002289	Angptl4	3.6828	ENSMUSG00000002885	Adgre5	5.92471	ENSMUSG00000002885	Adgre5	10.7106
ENSMUSG00000001348	Acp5	2.63415	ENSMUSG00000001517	Foxm1	5.1974	ENSMUSG00000001403	Ube2c	22.4643	ENSMUSG00000002308	Cd320	6.05357	ENSMUSG00000002897	Il17ra	3.07913	ENSMUSG00000002897	Il17ra	4.67491
ENSMUSG00000001380	Hars	2.14675	ENSMUSG00000001525	Tubb5	2.53342	ENSMUSG00000001416	Cct3	2.06187	ENSMUSG00000002379	Ndufa11	3.95349	ENSMUSG00000003469	Phyhip	11.2959	ENSMUSG00000003355	Fkbp11	2.31
ENSMUSG00000001403	Ube2c	23.9018	ENSMUSG00000001542	Ell2	2.5356	ENSMUSG00000001435	Col18a1	5.95466	ENSMUSG00000002550	Uck1	3.67536	ENSMUSG00000003810	Mast2	2.35961	ENSMUSG00000003469	Phyhip	6.96429
ENSMUSG00000001416	Cct3	2.37972	ENSMUSG00000001552	Jup	2.98011	ENSMUSG00000001497	Pax9	3.86598	ENSMUSG00000002603	Tgfb1	2.65952	ENSMUSG00000005268	Prlr	4.79929	ENSMUSG00000003559	As3mt	2.78453
ENSMUSG00000001435	Col18a1	5.50915	ENSMUSG00000001555	Fkbp10	5.51527	ENSMUSG00000001507	Itga3	2.75142	ENSMUSG00000002847	Pla1a	2.59598	ENSMUSG00000005413	Hmox1	4.55185	ENSMUSG00000003810	Mast2	2.77248
ENSMUSG00000001440	Kpnb1	2.01695	ENSMUSG00000001707	Eef1e1	2.62429	ENSMUSG00000001517	Foxm1	4.93506	ENSMUSG00000002885	Adgre5	9.79765	ENSMUSG00000005609	Ctr9	2.64186	ENSMUSG00000004371	Il11	3.71429
ENSMUSG00000001467	Cyp51	2.39775	ENSMUSG00000001995	Sipa1l2	3.13102	ENSMUSG00000001525	Tubb5	2.22836	ENSMUSG00000002897	Il17ra	2.73656	ENSMUSG00000005611	Mrvi1	3.11909	ENSMUSG00000005268	Prlr	8.95261
ENSMUSG00000001507	Itga3	2.50262	ENSMUSG00000002055	Spag5	7.33333	ENSMUSG00000001552	Jup	2.67104	ENSMUSG00000003355	Fkbp11	5.56	ENSMUSG00000005667	Mthfd2	3.31915	ENSMUSG00000005413	Hmox1	3.59681
ENSMUSG00000001517	Foxm1	4.45974	ENSMUSG00000002068	Ccne1	9.43333	ENSMUSG00000001555	Fkbp10	4.41603	ENSMUSG00000003469	Phyhip	3.08673	ENSMUSG00000005672	Kit	9.35451	ENSMUSG00000005481	Ddx39	3.18061
ENSMUSG00000001525	Tubb5	2.24031	ENSMUSG00000002250	Ppard	2.25459	ENSMUSG00000001707	Eef1e1	2.56546	ENSMUSG00000004285	Atp6v1f	2.27162	ENSMUSG00000005686	Ampd3	5.40984	ENSMUSG00000005672	Kit	15.0369
ENSMUSG00000001542	Ell2	2.32199	ENSMUSG00000002289	Angptl4	4.48485	ENSMUSG00000001995	Sipa1l2	3.50802	ENSMUSG00000004630	Pcp2	8.25714	ENSMUSG00000005951	Shpk	3.02488	ENSMUSG00000005686	Ampd3	3.13961
ENSMUSG00000001552	Jup	2.72045	ENSMUSG00000002297	Dbf4	4.42216	ENSMUSG00000002055	Spag5	4.74359	ENSMUSG00000004885	Crabp2	2.9625	ENSMUSG00000006221	Hspb7	8.26519	ENSMUSG00000005951	Shpk	2.77114
ENSMUSG00000001555	Fkbp10	4.41603	ENSMUSG00000002343	Armc6	3.47917	ENSMUSG00000002068	Ccne1	10.2833	ENSMUSG00000004951	Hspb1	2.67353	ENSMUSG00000006344	Ggt5	5.60645	ENSMUSG00000006221	Hspb7	12.6077
ENSMUSG00000001707	Eef1e1	3.17078	ENSMUSG00000002477	Snrpd1	2.23326	ENSMUSG00000002107	Celf2	2.4769	ENSMUSG00000005054	Cstb	2.84801	ENSMUSG00000006800	Sulf2	2.7512	ENSMUSG00000006344	Ggt5	8.76344
ENSMUSG00000001995	Sipa1l2	2.459	ENSMUSG00000002603	Tgfb1	2.27846	ENSMUSG00000002250	Ppard	2.19037	ENSMUSG00000005268	Prlr	4.57489	ENSMUSG00000007655	Cav1	2.58014	ENSMUSG00000006567	Atp7b	9.03125
ENSMUSG00000002055	Spag5	5.05983	ENSMUSG00000002835	Chaf1a	3.10345	ENSMUSG00000002297	Dbf4	4.76347	ENSMUSG00000005413	Hmox1	4.40972	ENSMUSG00000007682	Dio2	2.75108	ENSMUSG00000006800	Sulf2	2.38225
ENSMUSG00000002068	Ccne1	13.1167	ENSMUSG00000002870	Mcm2	4.19242	ENSMUSG00000002343	Armc6	3.44444	ENSMUSG00000005481	Ddx39	2.48	ENSMUSG00000009185	Ccl8	8.15803	ENSMUSG00000007655	Cav1	2.23256
ENSMUSG00000002107	Celf2	3.74236	ENSMUSG00000002900	Lamb1	2.58902	ENSMUSG00000002477	Snrpd1	2.2772	ENSMUSG00000005667	Mthfd2	2.90071	ENSMUSG00000009687	Fxyd5	3.15724	ENSMUSG00000007682	Dio2	3.72098
ENSMUSG00000002250	Ppard	2.32492	ENSMUSG00000002984	Tomm40	2.89537	ENSMUSG00000002603	Tgfb1	2.97285	ENSMUSG00000005672	Kit	7.24385	ENSMUSG00000010307	Tmem86a	3.21552	ENSMUSG00000007783	Cpt1c	2.03995
ENSMUSG00000002297	Dbf4	5.93413	ENSMUSG00000003099	Ppp5c	2.0568	ENSMUSG00000002797	Ggct	3.57083	ENSMUSG00000006221	Hspb7	7.79558	ENSMUSG00000013584	Aldh1a2	6.33333	ENSMUSG00000009185	Ccl8	20.2746
ENSMUSG00000002343	Armc6	3.65625	ENSMUSG00000003438	Timm50	2.3054	ENSMUSG00000002835	Chaf1a	3.27042	ENSMUSG00000006344	Ggt5	6.32366	ENSMUSG00000013846	St3gal1	2.14088	ENSMUSG00000009293	Ube2g2	2.65982
ENSMUSG00000002477	Snrpd1	3.23954	ENSMUSG00000003469	Phyhip	12.4592	ENSMUSG00000002870	Mcm2	4.9763	ENSMUSG00000006442	Srm	2.12792	ENSMUSG00000014599	Csf1	2.44923	ENSMUSG00000009378	Slc16a12	10.1493
ENSMUSG00000002603	Tgfb1	3.22329	ENSMUSG00000003500	Impdh1	3.16833	ENSMUSG00000002984	Tomm40	2.40556	ENSMUSG00000006649	Nphs1	8.64	ENSMUSG00000016024	Lbp	2.95176	ENSMUSG00000009687	Fxyd5	3.38869
ENSMUSG00000002797	Ggct	3.95417	ENSMUSG00000003573	Homer3	2.42037	ENSMUSG00000003469	Phyhip	14.3546	ENSMUSG00000007682	Dio2	4.69088	ENSMUSG00000016494	Cd34	2.39592	ENSMUSG00000012819	Cdh23	3.23188
ENSMUSG00000002835	Chaf1a	3.22142	ENSMUSG00000003585	Sec14l2	2.98305	ENSMUSG00000003500	Impdh1	2.40333	ENSMUSG00000007892	Rplp1	3.97094	ENSMUSG00000016624	Phf21b	15.1	ENSMUSG00000013584	Aldh1a2	7.90164
ENSMUSG00000002870	Mcm2	4.28341	ENSMUSG00000003779	Kif20a	4.51125	ENSMUSG00000003573	Homer3	2.38451	ENSMUSG00000008668	Rps18	3.8453	ENSMUSG00000016763	Scube1	19.0697	ENSMUSG00000014813	Stc1	7.66094
ENSMUSG00000002900	Lamb1	2.33306	ENSMUSG00000003824	Syce2	2.12849	ENSMUSG00000003779	Kif20a	2.99125	ENSMUSG00000009185	Ccl8	46.8109	ENSMUSG00000017969	Ptgis	3.49591	ENSMUSG00000015451	C4a	2.95032
ENSMUSG00000002984	Tomm40	2.52407	ENSMUSG00000003955	Fam162a	8.3385	ENSMUSG00000003824	Syce2	2.41899	ENSMUSG00000009293	Ube2g2	2.43265	ENSMUSG00000018339	Gpx3	2.88005	ENSMUSG00000016024	Lbp	2.59854
ENSMUSG00000003038	Hmgn2	2.53089	ENSMUSG00000004043	Stat5a	4.55391	ENSMUSG00000003955	Fam162a	3.70804	ENSMUSG00000009378	Slc16a12	8.55224	ENSMUSG00000018920	Cxcl16	2.43227	ENSMUSG00000016150	Tenm1	3.8875
ENSMUSG00000003469	Phyhip	12.9464	ENSMUSG00000004099	Dnmt1	2.11399	ENSMUSG00000004043	Stat5a	7.48807	ENSMUSG00000009687	Fxyd5	5.82155	ENSMUSG00000019055	Plod1	2.66246	ENSMUSG00000016494	Cd34	2.18419
ENSMUSG00000003500	Impdh1	2.70667	ENSMUSG00000004530	Coro1c	2.59015	ENSMUSG00000004099	Dnmt1	2.01766	ENSMUSG00000010406	Mrpl52	5.21723	ENSMUSG00000019359	Gdpd2	5.03891	ENSMUSG00000016624	Phf21b	16.4571
ENSMUSG00000003549	Ercc1	2.57649	ENSMUSG00000004665	Cnn2	2.70614	ENSMUSG00000004530	Coro1c	2.68343	ENSMUSG00000013584	Aldh1a2	7.81421	ENSMUSG00000019779	Frk	2.61285	ENSMUSG00000016763	Scube1	20.3854
ENSMUSG00000003573	Homer3	2.70588	ENSMUSG00000004849	Ap1s1	2.13038	ENSMUSG00000004665	Cnn2	2.25175	ENSMUSG00000014813	Stc1	3.9485	ENSMUSG00000019853	Hebp2	2.90306	ENSMUSG00000018334	Ksr1	3.19519
ENSMUSG00000003779	Kif20a	3.6175	ENSMUSG00000004880	Lbr	2.11807	ENSMUSG00000004849	Ap1s1	2.27392	ENSMUSG00000015451	C4a	7.33013	ENSMUSG00000020014	Cfap54	19.4423	ENSMUSG00000018339	Gpx3	7.64409
ENSMUSG00000003824	Syce2	3.41341	ENSMUSG00000004885	Crabp2	7.31056	ENSMUSG00000004885	Crabp2	6.41304	ENSMUSG00000016024	Lbp	3.18883	ENSMUSG00000020027	Socs2	4.38701	ENSMUSG00000018648	Dusp14	3.02874
ENSMUSG00000003955	Fam162a	5.13329	ENSMUSG00000004929	Thop1	2.13694	ENSMUSG00000004891	Nes	4.66667	ENSMUSG00000016252	Atp5e	8.44196	ENSMUSG00000020032	Nuak1	2.22286	ENSMUSG00000018677	Slc25a39	2.43469
ENSMUSG00000004043	Stat5a	5.02058	ENSMUSG00000004951	Hspb1	2.08844	ENSMUSG00000004951	Hspb1	2.29917	ENSMUSG00000016427	Ndufa1	3.11236	ENSMUSG00000020044	Timp3	2.99481	ENSMUSG00000019055	Plod1	3.11726
ENSMUSG00000004530	Coro1c	2.84085	ENSMUSG00000005087	Cd44	3.99159	ENSMUSG00000005087	Cd44	3.49084	ENSMUSG00000016624	Phf21b	13.1429	ENSMUSG00000020053	Igf1	12.1418	ENSMUSG00000019359	Gdpd2	11.786
ENSMUSG00000004665	Cnn2	2.78246	ENSMUSG00000005233	Spc25	2.74448	ENSMUSG00000005233	Spc25	2.67823	ENSMUSG00000016763	Scube1	12.4954	ENSMUSG00000020077	Srgn	3.89795	ENSMUSG00000019818	Cd164	2.11391
ENSMUSG00000004771	Rab11a	2.17406	ENSMUSG00000005299	Letm1	2.33986	ENSMUSG00000005299	Letm1	2.30433	ENSMUSG00000017778	Cox7c	2.44043	ENSMUSG00000020178	Adora2a	14.0649	ENSMUSG00000019850	Tnfaip3	6.71914
ENSMUSG00000004849	Ap1s1	2.84091	ENSMUSG00000005410	Mcm5	7.32286	ENSMUSG00000005410	Mcm5	7.46734	ENSMUSG00000017817	Jph2	3.65138	ENSMUSG00000020241	Col6a2	3.56681	ENSMUSG00000020014	Cfap54	26.9327
ENSMUSG00000004885	Crabp2	8.00932	ENSMUSG00000005470	Asf1b	6.45055	ENSMUSG00000005413	Hmox1	5.64655	ENSMUSG00000018102	Hist1h2bc	3.63342	ENSMUSG00000020361	Hspa4	3.03755	ENSMUSG00000020017	Hal	5.7972
ENSMUSG00000004891	Nes	4.40278	ENSMUSG00000005481	Ddx39	2.50739	ENSMUSG00000005470	Asf1b	7.68132	ENSMUSG00000018293	Pfn1	3.07327	ENSMUSG00000020431	Adcy1	5.01802	ENSMUSG00000020023	Tmcc3	2.40073
ENSMUSG00000004897	Hdgf	2.06317	ENSMUSG00000005667	Mthfd2	8.51327	ENSMUSG00000005481	Ddx39	2.49535	ENSMUSG00000018339	Gpx3	11.0037	ENSMUSG00000020524	Gria1	3.79048	ENSMUSG00000020027	Socs2	7.67797
ENSMUSG00000005087	Cd44	3.41745	ENSMUSG00000005732	Ranbp1	2.59876	ENSMUSG00000005667	Mthfd2	8.35398	ENSMUSG00000018585	Atox1	3.55819	ENSMUSG00000020610	Amz2	2.33208	ENSMUSG00000020032	Nuak1	2.74827
ENSMUSG00000005233	Spc25	3.13249	ENSMUSG00000006143	Upk3bl	3.29208	ENSMUSG00000005732	Ranbp1	2.68351	ENSMUSG00000018677	Slc25a39	2.78776	ENSMUSG00000020646	Mboat2	2.7525	ENSMUSG00000020044	Timp3	2.54529
ENSMUSG00000005299	Letm1	2.44181	ENSMUSG00000006205	Htra1	4.57666	ENSMUSG00000006143	Upk3bl	3.78713	ENSMUSG00000019055	Plod1	2.52606	ENSMUSG00000020676	Ccl11	6.049	ENSMUSG00000020053	Igf1	9.36784
ENSMUSG00000005410	Mcm5	6.79523	ENSMUSG00000006219	Fblim1	4.28571	ENSMUSG00000006205	Htra1	5.25172	ENSMUSG00000019359	Gdpd2	10.0039	ENSMUSG00000020712	Tcam1	8.12903	ENSMUSG00000020077	Srgn	5.63721
ENSMUSG00000005470	Asf1b	7.81319	ENSMUSG00000006369	Fbln1	5.2493	ENSMUSG00000006219	Fblim1	5.70588	ENSMUSG00000019850	Tnfaip3	4.26199	ENSMUSG00000020743	Mif4gd	2.2452	ENSMUSG00000020178	Adora2a	16.5584
ENSMUSG00000005481	Ddx39	2.75534	ENSMUSG00000006378	Gcat	7.25	ENSMUSG00000006369	Fbln1	4.57569	ENSMUSG00000019987	Arg1	18.4211	ENSMUSG00000020889	Nr1d1	3.29968	ENSMUSG00000020241	Col6a2	3.91936
ENSMUSG00000005667	Mthfd2	9.30088	ENSMUSG00000006398	Cdc20	13.3088	ENSMUSG00000006378	Gcat	4.87826	ENSMUSG00000020014	Cfap54	21.5385	ENSMUSG00000021070	Bdkrb2	5.5431	ENSMUSG00000020361	Hspa4	3.30927
ENSMUSG00000005732	Ranbp1	3.31649	ENSMUSG00000006442	Srm	3.14329	ENSMUSG00000006398	Cdc20	8.85965	ENSMUSG00000020027	Socs2	5.62373	ENSMUSG00000021136	Smoc1	3.40942	ENSMUSG00000020431	Adcy1	10.268
ENSMUSG00000006143	Upk3bl	5.00495	ENSMUSG00000006585	Cdt1	3.32634	ENSMUSG00000006442	Srm	3.12826	ENSMUSG00000020053	Igf1	3.98178	ENSMUSG00000021223	Papln	3.0343	ENSMUSG00000020524	Gria1	4.9619
ENSMUSG00000006205	Htra1	4.70938	ENSMUSG00000006589	Aprt	2.31704	ENSMUSG00000006445	Epha2	2.48587	ENSMUSG00000020077	Srgn	7.6117	ENSMUSG00000021356	Irf4	5.95866	ENSMUSG00000020614	Fam20a	2.06222
ENSMUSG00000006219	Fblim1	6.78992	ENSMUSG00000006931	P3h4	6.49872	ENSMUSG00000006585	Cdt1	3.54008	ENSMUSG00000020163	Uqcr11	4.65636	ENSMUSG00000021822	Plau	6.31015	ENSMUSG00000020646	Mboat2	4.78044
ENSMUSG00000006369	Fbln1	3.73157	ENSMUSG00000006998	Psmd2	2.13515	ENSMUSG00000006678	Pola1	2.08462	ENSMUSG00000020178	Adora2a	11.5325	ENSMUSG00000021991	Cacna2d3	5.88811	ENSMUSG00000020649	Rrm2	2.46154
ENSMUSG00000006378	Gcat	6.89783	ENSMUSG00000007041	Clic1	2.27796	ENSMUSG00000006931	P3h4	4.78061	ENSMUSG00000020241	Col6a2	3.78634	ENSMUSG00000022003	Slc25a30	3.03621	ENSMUSG00000020676	Ccl11	9.0567
ENSMUSG00000006392	Med8	2.00307	ENSMUSG00000007050	Lsm2	2.52143	ENSMUSG00000007041	Clic1	2.14603	ENSMUSG00000020431	Adcy1	3.93243	ENSMUSG00000022220	Adcy4	2.28502	ENSMUSG00000020689	Itgb3	2.76105
ENSMUSG00000006398	Cdc20	10.0807	ENSMUSG00000007080	Pole	3.31853	ENSMUSG00000007050	Lsm2	2.78333	ENSMUSG00000020477	Mrps24	2.42584	ENSMUSG00000022221	Ripk3	2.59649	ENSMUSG00000020712	Tcam1	6.96774
ENSMUSG00000006442	Srm	3.28257	ENSMUSG00000007646	Rad51c	3.43333	ENSMUSG00000007080	Pole	3.1909	ENSMUSG00000020614	Fam20a	2.30956	ENSMUSG00000022323	Rida	2.97196	ENSMUSG00000020715	Ern1	2.49164
ENSMUSG00000006585	Cdt1	2.97519	ENSMUSG00000007655	Cav1	4.31893	ENSMUSG00000007379	Dennd2c	2.61464	ENSMUSG00000020646	Mboat2	3.23952	ENSMUSG00000022367	Has2	5.26683	ENSMUSG00000020743	Mif4gd	2.38593
ENSMUSG00000006589	Aprt	2.18355	ENSMUSG00000007721	Ccdc124	2.48087	ENSMUSG00000007646	Rad51c	3.96667	ENSMUSG00000020676	Ccl11	10.3773	ENSMUSG00000022747	St3gal6	2.47211	ENSMUSG00000020806	Rhbdf2	5.30714
ENSMUSG00000006931	P3h4	5.79464	ENSMUSG00000007888	Crlf1	8.14815	ENSMUSG00000007655	Cav1	5.4982	ENSMUSG00000020715	Ern1	2.38573	ENSMUSG00000022769	Sdf2l1	2.52419	ENSMUSG00000020817	Rabep1	2.41852
ENSMUSG00000006998	Psmd2	2.23605	ENSMUSG00000008136	Fhl2	14.4977	ENSMUSG00000007682	Dio2	9.35971	ENSMUSG00000020736	Nt5c	2.95814	ENSMUSG00000022803	Popdc2	2.92197	ENSMUSG00000020889	Nr1d1	5.62516
ENSMUSG00000007041	Clic1	2.45578	ENSMUSG00000008226	Scrn3	2.08571	ENSMUSG00000007721	Ccdc124	2.37604	ENSMUSG00000020806	Rhbdf2	3.41071	ENSMUSG00000022840	Adcy5	4.08776	ENSMUSG00000020963	Tshr	5.41304
ENSMUSG00000007050	Lsm2	3.1619	ENSMUSG00000009013	Dynll1	2.82026	ENSMUSG00000008136	Fhl2	12.707	ENSMUSG00000020857	Nme2	4.72433	ENSMUSG00000023041	Krt6b	33.7308	ENSMUSG00000021070	Bdkrb2	4.86207
ENSMUSG00000007080	Pole	2.70921	ENSMUSG00000009112	Bcl2l13	2.5271	ENSMUSG00000009013	Dynll1	2.55258	ENSMUSG00000020889	Nr1d1	3.31605	ENSMUSG00000023094	Msrb2	4.5902	ENSMUSG00000021136	Smoc1	3.32042
ENSMUSG00000007646	Rad51c	3.85	ENSMUSG00000009378	Slc16a12	11.6806	ENSMUSG00000009112	Bcl2l13	2.4968	ENSMUSG00000020963	Tshr	5.78261	ENSMUSG00000023885	Thbs2	4.67681	ENSMUSG00000021223	Papln	3.55145
ENSMUSG00000007655	Cav1	3.85457	ENSMUSG00000009418	Nav1	3.13312	ENSMUSG00000009378	Slc16a12	25.6111	ENSMUSG00000021070	Bdkrb2	4.43103	ENSMUSG00000023992	Trem2	46.7662	ENSMUSG00000021313	Ryr2	2.63739
ENSMUSG00000007682	Dio2	7.13309	ENSMUSG00000009900	Wnt3a	4.51613	ENSMUSG00000009900	Wnt3a	3.26882	ENSMUSG00000021123	Rdh12	4.01	ENSMUSG00000023993	Treml1	140.952	ENSMUSG00000021356	Irf4	5.00197
ENSMUSG00000007721	Ccdc124	3.16306	ENSMUSG00000010047	Hyal2	2.36337	ENSMUSG00000010048	Ifrd2	2.39655	ENSMUSG00000021136	Smoc1	2.78743	ENSMUSG00000024529	Lox	2.40663	ENSMUSG00000021614	Vcan	2.79528
ENSMUSG00000008136	Fhl2	12.2465	ENSMUSG00000010048	Ifrd2	2.52931	ENSMUSG00000010660	Plcd1	3.16519	ENSMUSG00000021223	Papln	3.70712	ENSMUSG00000024589	Nedd4l	2.13243	ENSMUSG00000021684	Pde8b	2.15551
ENSMUSG00000008226	Scrn3	2.01143	ENSMUSG00000010660	Plcd1	3.91962	ENSMUSG00000011148	Adssl1	3.94565	ENSMUSG00000021290	2010107E04Rik	3.5801	ENSMUSG00000024691	Fam111a	2.66603	ENSMUSG00000021728	Emb	6.78736
ENSMUSG00000008333	Snrpb2	2.26016	ENSMUSG00000011179	Odc1	2.10837	ENSMUSG00000011263	Exoc3l2	6.05714	ENSMUSG00000021356	Irf4	4.37402	ENSMUSG00000024712	Rfk	2.50017	ENSMUSG00000021758	Ddx4	22.9
ENSMUSG00000009013	Dynll1	3.09044	ENSMUSG00000011263	Exoc3l2	6.45714	ENSMUSG00000011752	Pgam1	3.51638	ENSMUSG00000021485	Mxd3	3.77016	ENSMUSG00000024713	Pcsk5	5.43054	ENSMUSG00000021775	Nr1d2	2.66269
ENSMUSG00000009112	Bcl2l13	2.7341	ENSMUSG00000011752	Pgam1	4.07424	ENSMUSG00000011884	Gltp	3.15387	ENSMUSG00000021702	Thbs4	3.46933	ENSMUSG00000024924	Vldlr	2.70485	ENSMUSG00000021822	Plau	5.31692
ENSMUSG00000009378	Slc16a12	26.5764	ENSMUSG00000012126	Ubxn11	2.33962	ENSMUSG00000012126	Ubxn11	2.6457	ENSMUSG00000021728	Emb	5.668	ENSMUSG00000024978	Gpam	2.66366	ENSMUSG00000021991	Cacna2d3	5.53147
ENSMUSG00000009900	Wnt3a	3.52151	ENSMUSG00000012443	Kif11	7.4943	ENSMUSG00000012443	Kif11	5.67681	ENSMUSG00000021773	Comtd1	2.51442	ENSMUSG00000025089	Gfra1	10.0358	ENSMUSG00000022003	Slc25a30	2.79805
ENSMUSG00000010047	Hyal2	2.50665	ENSMUSG00000012519	Mlkl	4.19192	ENSMUSG00000012519	Mlkl	4.93434	ENSMUSG00000021822	Plau	6.51692	ENSMUSG00000025938	Slco5a1	3.75685	ENSMUSG00000022221	Ripk3	4.17544
ENSMUSG00000010048	Ifrd2	2.63276	ENSMUSG00000013236	Ptprs	2.36986	ENSMUSG00000013236	Ptprs	2.11606	ENSMUSG00000021967	Mrpl57	2.30508	ENSMUSG00000025950	Idh1	4.38209	ENSMUSG00000022367	Has2	4.11202
ENSMUSG00000010307	Tmem86a	3.30233	ENSMUSG00000013629	Cad	2.81584	ENSMUSG00000013629	Cad	2.35994	ENSMUSG00000021991	Cacna2d3	3.43357	ENSMUSG00000025955	Akr1cl	312.515	ENSMUSG00000022523	Fgf12	3.62306
ENSMUSG00000010376	Nedd8	2.16336	ENSMUSG00000015093	Clic3	2.76699	ENSMUSG00000013643	Lypd8	215.806	ENSMUSG00000022221	Ripk3	5.15789	ENSMUSG00000026051	1500015O10Rik	6.25806	ENSMUSG00000022747	St3gal6	3.46722
ENSMUSG00000010660	Plcd1	3.4481	ENSMUSG00000015143	Actn1	5.43276	ENSMUSG00000014633	Cmc2	2.77778	ENSMUSG00000022382	Wnt7b	4.5	ENSMUSG00000026241	Nppc	4.86239	ENSMUSG00000022769	Sdf2l1	2.39516
ENSMUSG00000010755	Cars	2.17184	ENSMUSG00000015880	Ncapg	5.5771	ENSMUSG00000014907	Naf1	2.00569	ENSMUSG00000022584	Ly6c2	4.19048	ENSMUSG00000026249	Serpine2	2.09013	ENSMUSG00000022814	Umps	2.90236
ENSMUSG00000010911	Apip	2.52561	ENSMUSG00000015966	Il17rb	2.75926	ENSMUSG00000015143	Actn1	5.82276	ENSMUSG00000022586	Ly6i	5.56818	ENSMUSG00000026343	Gpr39	2.84956	ENSMUSG00000022840	Adcy5	6.17131
ENSMUSG00000011148	Adssl1	3.9837	ENSMUSG00000016257	Slmo2	2.2	ENSMUSG00000015880	Ncapg	4.28037	ENSMUSG00000022747	St3gal6	2.52859	ENSMUSG00000026344	Lypd1	3.26946	ENSMUSG00000022842	Ece2	2.45455
ENSMUSG00000011752	Pgam1	4.71397	ENSMUSG00000016757	Ttll12	2.12648	ENSMUSG00000016128	Stard13	3.54291	ENSMUSG00000022769	Sdf2l1	3.06452	ENSMUSG00000026399	Cd55	3.76875	ENSMUSG00000022844	Pdia5	2.6414
ENSMUSG00000011884	Gltp	3.4668	ENSMUSG00000017146	Brca1	2.75	ENSMUSG00000016257	Slmo2	2.51592	ENSMUSG00000022840	Adcy5	4.13925	ENSMUSG00000026401	Cd55b	3.53846	ENSMUSG00000023041	Krt6b	16.3077
ENSMUSG00000012126	Ubxn11	2.83019	ENSMUSG00000017499	Cdc6	4.1958	ENSMUSG00000016520	Lnx2	2.10541	ENSMUSG00000023041	Krt6b	100.231	ENSMUSG00000026525	Opn3	2.38202	ENSMUSG00000023094	Msrb2	5.03529
ENSMUSG00000012422	Tmem167	2.70316	ENSMUSG00000017607	Tns4	5.62542	ENSMUSG00000016757	Ttll12	2.45587	ENSMUSG00000023094	Msrb2	3.96078	ENSMUSG00000026527	Rgs7	3.67273	ENSMUSG00000023885	Thbs2	7.95242
ENSMUSG00000012443	Kif11	6.45437	ENSMUSG00000017716	Birc5	11.4214	ENSMUSG00000017146	Brca1	3.06522	ENSMUSG00000023885	Thbs2	5.54108	ENSMUSG00000026532	Spta1	40.3333	ENSMUSG00000023913	Pla2g7	2.81818
ENSMUSG00000012519	Mlkl	7.64646	ENSMUSG00000017765	Slc12a4	2.53169	ENSMUSG00000017499	Cdc6	4.60839	ENSMUSG00000023913	Pla2g7	2.79091	ENSMUSG00000026640	Plxna2	2.80413	ENSMUSG00000023992	Trem2	65.8052
ENSMUSG00000013629	Cad	2.5157	ENSMUSG00000017861	Mybl2	4.51485	ENSMUSG00000017607	Tns4	7.52632	ENSMUSG00000023992	Trem2	76.7922	ENSMUSG00000026737	Pip4k2a	2.49232	ENSMUSG00000023993	Treml1	112.381
ENSMUSG00000013663	Pten	2.14248	ENSMUSG00000018102	Hist1h2bc	3.09381	ENSMUSG00000017716	Birc5	10.0571	ENSMUSG00000024205	Rpl36-ps2	18.1395	ENSMUSG00000026840	Lamc3	2.92982	ENSMUSG00000024091	Vapa	2.21664
ENSMUSG00000013701	Timm23	2.3788	ENSMUSG00000018189	Uchl5	2.11538	ENSMUSG00000017765	Slc12a4	2.86796	ENSMUSG00000024208	Uqcc2	3.94737	ENSMUSG00000027068	Dhrs9	15.4898	ENSMUSG00000024331	Dsc2	4.47292
ENSMUSG00000014226	Cacybp	2.51945	ENSMUSG00000018293	Pfn1	2.34309	ENSMUSG00000017861	Mybl2	4.68317	ENSMUSG00000024331	Dsc2	6.20578	ENSMUSG00000027459	Fam110a	3.09559	ENSMUSG00000024534	Sncaip	2.73408
ENSMUSG00000014633	Cmc2	3.46465	ENSMUSG00000018362	Kpna2	6.83888	ENSMUSG00000018102	Hist1h2bc	3.01838	ENSMUSG00000024608	Rps14	2.72168	ENSMUSG00000027514	Zbp1	2.82836	ENSMUSG00000024589	Nedd4l	2.40761
ENSMUSG00000014907	Naf1	2.11434	ENSMUSG00000018381	Abi3	4.07413	ENSMUSG00000018189	Uchl5	2.2415	ENSMUSG00000024653	Scgb1a1	22.2727	ENSMUSG00000027540	Ptpn1	2.33492	ENSMUSG00000024691	Fam111a	2.39539
ENSMUSG00000015143	Actn1	5.6792	ENSMUSG00000018509	Cenpv	2.84351	ENSMUSG00000018239	Zcchc10	2.74569	ENSMUSG00000024661	Fth1	2.12751	ENSMUSG00000027593	Raly	4.12671	ENSMUSG00000024713	Pcsk5	3.64731
ENSMUSG00000015668	Pdzd11	2.02093	ENSMUSG00000018593	Sparc	4.95226	ENSMUSG00000018293	Pfn1	2.09775	ENSMUSG00000024713	Pcsk5	2.77246	ENSMUSG00000027596	a	4.02927	ENSMUSG00000024736	Tmem132a	2.59963
ENSMUSG00000015671	Psma2	2.53134	ENSMUSG00000018677	Slc25a39	2.23736	ENSMUSG00000018362	Kpna2	5.04511	ENSMUSG00000024736	Tmem132a	3.52468	ENSMUSG00000027656	Wisp2	6.52121	ENSMUSG00000024737	Slc15a3	2.42143
ENSMUSG00000015749	Anp32e	2.09864	ENSMUSG00000018821	Avpi1	2.9642	ENSMUSG00000018381	Abi3	3.05959	ENSMUSG00000024737	Slc15a3	2.86071	ENSMUSG00000027748	Trpc4	4.03896	ENSMUSG00000024785	Rcl1	2.1078
ENSMUSG00000015759	Cnih1	2.13504	ENSMUSG00000018848	Rars	2.20148	ENSMUSG00000018509	Cenpv	2.46565	ENSMUSG00000024772	Ehd1	2.34719	ENSMUSG00000027894	Slc6a17	3.34615	ENSMUSG00000024885	Aldh3b1	3.13095
ENSMUSG00000015880	Ncapg	5.1028	ENSMUSG00000019055	Plod1	4.82464	ENSMUSG00000018593	Sparc	4.42622	ENSMUSG00000024854	Pold4	3.93023	ENSMUSG00000027962	Vcam1	2.80511	ENSMUSG00000024922	Ovol1	5.11189
ENSMUSG00000016128	Stard13	3.32399	ENSMUSG00000019179	Mdh2	2.40875	ENSMUSG00000018821	Avpi1	3.03233	ENSMUSG00000024856	Cdk2ap2	2.2571	ENSMUSG00000028108	Ecm1	2.59224	ENSMUSG00000024924	Vldlr	2.39203
ENSMUSG00000016257	Slmo2	2.87771	ENSMUSG00000019214	Chtf18	3.67832	ENSMUSG00000018848	Rars	2.01448	ENSMUSG00000024953	Prdx5	3.97033	ENSMUSG00000028132	Tmem56	3.05665	ENSMUSG00000024953	Prdx5	2.89416
ENSMUSG00000016308	Ube2a	2.34706	ENSMUSG00000019359	Gdpd2	2.54633	ENSMUSG00000018965	Ywhah	2.16658	ENSMUSG00000024972	Lgals12	4.97674	ENSMUSG00000028172	Tacr3	7.9375	ENSMUSG00000024978	Gpam	2.06456
ENSMUSG00000016520	Lnx2	2.33122	ENSMUSG00000019761	Krt10	7.07045	ENSMUSG00000019055	Plod1	4.00474	ENSMUSG00000025089	Gfra1	9.70674	ENSMUSG00000028197	Col24a1	4.62201	ENSMUSG00000025089	Gfra1	20.0194
ENSMUSG00000016757	Ttll12	2.07783	ENSMUSG00000019773	Fbxo5	2.34127	ENSMUSG00000019179	Mdh2	2.16364	ENSMUSG00000025105	Bnc1	3.36471	ENSMUSG00000028328	Tmod1	2.10959	ENSMUSG00000025105	Bnc1	4.04706
ENSMUSG00000017146	Brca1	3.11087	ENSMUSG00000019848	Popdc3	3.37195	ENSMUSG00000019214	Chtf18	3.51748	ENSMUSG00000025329	Padi1	5.35088	ENSMUSG00000028469	Npr2	2.17928	ENSMUSG00000025330	Padi4	5.31855
ENSMUSG00000017221	Psmd3	2.17002	ENSMUSG00000019942	Cdk1	8.27835	ENSMUSG00000019359	Gdpd2	2.34363	ENSMUSG00000025330	Padi4	4.41129	ENSMUSG00000028488	Sh3gl2	7.06835	ENSMUSG00000025938	Slco5a1	5.53779
ENSMUSG00000017499	Cdc6	6.4965	ENSMUSG00000019990	Pde7b	8.14103	ENSMUSG00000019564	Arid3a	2.03125	ENSMUSG00000025473	Adam8	2.58989	ENSMUSG00000028766	Alpl	7.67318	ENSMUSG00000025955	Akr1cl	224.545
ENSMUSG00000017607	Tns4	7.3398	ENSMUSG00000019992	Mtfr2	3.65385	ENSMUSG00000019761	Krt10	4.12798	ENSMUSG00000025481	Urah	8.48305	ENSMUSG00000028927	Padi2	176.837	ENSMUSG00000026051	1500015O10Rik	3.83871
ENSMUSG00000017716	Birc5	11.1071	ENSMUSG00000020032	Nuak1	3.37559	ENSMUSG00000019848	Popdc3	2.72561	ENSMUSG00000025938	Slco5a1	3.4195	ENSMUSG00000028957	Per3	3.03657	ENSMUSG00000026073	Il1r2	3.34959
ENSMUSG00000017765	Slc12a4	2.47359	ENSMUSG00000020089	Ppa1	2.62963	ENSMUSG00000019851	Perp	2.07584	ENSMUSG00000025955	Akr1cl	151.788	ENSMUSG00000028989	Angptl7	2.41418	ENSMUSG00000026110	Mgat4a	2.44595
ENSMUSG00000017861	Mybl2	5.37624	ENSMUSG00000020108	Ddit4	2.23129	ENSMUSG00000019942	Cdk1	8.45876	ENSMUSG00000026051	1500015O10Rik	6.6129	ENSMUSG00000029096	Htra3	2.27975	ENSMUSG00000026241	Nppc	13.2339
ENSMUSG00000018102	Hist1h2bc	3.68375	ENSMUSG00000020116	Pno1	2.63125	ENSMUSG00000019960	Dusp6	2.21896	ENSMUSG00000026073	Il1r2	4.03963	ENSMUSG00000029123	Stk32b	34.7732	ENSMUSG00000026343	Gpr39	5.97345
ENSMUSG00000018189	Uchl5	2.71288	ENSMUSG00000020185	E2f7	10.8636	ENSMUSG00000019990	Pde7b	21.8077	ENSMUSG00000026241	Nppc	48.3991	ENSMUSG00000029228	Lnx1	3.36062	ENSMUSG00000026344	Lypd1	6.00599
ENSMUSG00000018239	Zcchc10	3.81034	ENSMUSG00000020186	Csrp2	5.032	ENSMUSG00000019992	Mtfr2	4.42308	ENSMUSG00000026247	Ecel1	15.8889	ENSMUSG00000029484	Anxa3	5.57062	ENSMUSG00000026442	Nfasc	2.06407
ENSMUSG00000018286	Psmb6	2.332	ENSMUSG00000020256	Aldh1l2	6.79747	ENSMUSG00000020018	Snrpf	2.60135	ENSMUSG00000026249	Serpine2	2.645	ENSMUSG00000029759	Pon3	2.19506	ENSMUSG00000026479	Lamc2	2.23595
ENSMUSG00000018293	Pfn1	2.4391	ENSMUSG00000020267	Hint1	2.12871	ENSMUSG00000020032	Nuak1	2.45033	ENSMUSG00000026343	Gpr39	3.52212	ENSMUSG00000029878	Dbpht2	9.84746	ENSMUSG00000026527	Rgs7	4.29091
ENSMUSG00000018362	Kpna2	6.57143	ENSMUSG00000020307	Cdc34	2.58909	ENSMUSG00000020089	Ppa1	3.00835	ENSMUSG00000026344	Lypd1	3.66467	ENSMUSG00000029910	Mad2l1	7.06206	ENSMUSG00000026532	Spta1	51.8992
ENSMUSG00000018379	Srsf1	2.26916	ENSMUSG00000020325	Fstl3	2.32117	ENSMUSG00000020116	Pno1	3.38625	ENSMUSG00000026401	Cd55b	3.37363	ENSMUSG00000030111	A2m	13.7241	ENSMUSG00000026640	Plxna2	3.90459
ENSMUSG00000018381	Abi3	3.04215	ENSMUSG00000020328	Nudcd2	2.13718	ENSMUSG00000020185	E2f7	13.039	ENSMUSG00000026442	Nfasc	2.08148	ENSMUSG00000030254	Rad18	3.00732	ENSMUSG00000026737	Pip4k2a	2.45752
ENSMUSG00000018446	C1qbp	2.05213	ENSMUSG00000020330	Hmmr	10.9721	ENSMUSG00000020186	Csrp2	9.104	ENSMUSG00000026527	Rgs7	5.4	ENSMUSG00000030284	Creld1	2.12083	ENSMUSG00000026764	Kif5c	3.40719
ENSMUSG00000018509	Cenpv	2.80534	ENSMUSG00000020361	Hspa4	2.55545	ENSMUSG00000020256	Aldh1l2	5.11392	ENSMUSG00000026532	Spta1	21.2713	ENSMUSG00000030623	Prss23os	3.62199	ENSMUSG00000026817	Ak1	2.61779
ENSMUSG00000018593	Sparc	4.74653	ENSMUSG00000020402	Vdac1	2.17174	ENSMUSG00000020267	Hint1	2.11386	ENSMUSG00000026582	Sele	4.55285	ENSMUSG00000030787	Lyve1	3.07692	ENSMUSG00000026840	Lamc3	2.23445
ENSMUSG00000018677	Slc25a39	2.05907	ENSMUSG00000020411	Nipal4	8.04255	ENSMUSG00000020303	Stc2	10.7805	ENSMUSG00000026764	Kif5c	2.82784	ENSMUSG00000030854	Ptpn5	34.9534	ENSMUSG00000027068	Dhrs9	24.8571
ENSMUSG00000018770	Atp5g3	2.1987	ENSMUSG00000020415	Pttg1	6.74286	ENSMUSG00000020323	Prss57	2.32258	ENSMUSG00000026817	Ak1	4.53125	ENSMUSG00000031490	Eif4ebp1	2.04688	ENSMUSG00000027254	Map1a	2.16313
ENSMUSG00000018821	Avpi1	3.21132	ENSMUSG00000020424	Gatsl3	2.40964	ENSMUSG00000020325	Fstl3	2.47445	ENSMUSG00000026931	1700019N19Rik	11.9298	ENSMUSG00000031821	Gins2	2.08989	ENSMUSG00000027281	Slx4ip	2.80137
ENSMUSG00000018848	Rars	2.39266	ENSMUSG00000020493	Prr11	8.13587	ENSMUSG00000020328	Nudcd2	2.75149	ENSMUSG00000027068	Dhrs9	11.4337	ENSMUSG00000031870	Pgr	10.2902	ENSMUSG00000027460	Angpt4	11.7826
ENSMUSG00000018965	Ywhah	2.26192	ENSMUSG00000020527	Myo19	2.45346	ENSMUSG00000020330	Hmmr	6.14343	ENSMUSG00000027460	Angpt4	22.5652	ENSMUSG00000031891	Hsd11b2	15.5568	ENSMUSG00000027514	Zbp1	3.36567
ENSMUSG00000019055	Plod1	3.75355	ENSMUSG00000020592	Sdc1	3.24019	ENSMUSG00000020361	Hspa4	2.60683	ENSMUSG00000027514	Zbp1	3.39552	ENSMUSG00000031932	Gpr83	369.98	ENSMUSG00000027540	Ptpn1	2.67458
ENSMUSG00000019179	Mdh2	2.65317	ENSMUSG00000020614	Fam20a	8.5	ENSMUSG00000020392	Cdkn2aipnl	2.0447	ENSMUSG00000027540	Ptpn1	2.2965	ENSMUSG00000032011	Thy1	3.0897	ENSMUSG00000027593	Raly	5.25069
ENSMUSG00000019214	Chtf18	3.51049	ENSMUSG00000020649	Rrm2	8.21996	ENSMUSG00000020402	Vdac1	2.1387	ENSMUSG00000027593	Raly	5.58802	ENSMUSG00000032313	Tmem266	4.78723	ENSMUSG00000027596	a	5.09024
ENSMUSG00000019303	Psmc3ip	2.11563	ENSMUSG00000020682	Mmp28	2.78395	ENSMUSG00000020411	Nipal4	8.40426	ENSMUSG00000027596	a	6.4439	ENSMUSG00000032374	Plod2	4.32112	ENSMUSG00000027597	Ahcy	4.13089
ENSMUSG00000019359	Gdpd2	2.10328	ENSMUSG00000020695	Mrc2	11.976	ENSMUSG00000020415	Pttg1	4.73143	ENSMUSG00000027597	Ahcy	4.31414	ENSMUSG00000032548	Slco2a1	5.87266	ENSMUSG00000027603	Ggt7	2.40127
ENSMUSG00000019373	Cops3	2.10279	ENSMUSG00000020737	Hn1	2.15294	ENSMUSG00000020427	Igfbp3	2.43066	ENSMUSG00000027602	Map1lc3a	2.62007	ENSMUSG00000032572	Col6a4	23.8129	ENSMUSG00000027656	Wisp2	5.2655
ENSMUSG00000019494	Cops6	2.22206	ENSMUSG00000020758	Itgb4	2.19601	ENSMUSG00000020493	Prr11	5.54348	ENSMUSG00000027656	Wisp2	3.91724	ENSMUSG00000032640	Chsy1	2.60542	ENSMUSG00000027702	Lrrc34	6.0411
ENSMUSG00000019564	Arid3a	2.91518	ENSMUSG00000020773	Trim47	2.6917	ENSMUSG00000020527	Myo19	2.4953	ENSMUSG00000027748	Trpc4	7.81818	ENSMUSG00000032649	Colgalt2	7.28339	ENSMUSG00000027748	Trpc4	10.4805
ENSMUSG00000019761	Krt10	5.36003	ENSMUSG00000020785	Camkk1	3.53405	ENSMUSG00000020592	Sdc1	2.79438	ENSMUSG00000027947	Il6ra	2.47506	ENSMUSG00000032726	Bmp8a	40.7705	ENSMUSG00000027828	Ssr3	2.61285
ENSMUSG00000019773	Fbxo5	2.60714	ENSMUSG00000020788	Atp2a3	3.70968	ENSMUSG00000020614	Fam20a	5.55435	ENSMUSG00000027962	Vcam1	4.28017	ENSMUSG00000032806	Slc10a3	2.93125	ENSMUSG00000027947	Il6ra	2.72256
ENSMUSG00000019782	Rwdd1	2.18063	ENSMUSG00000020803	Txndc17	3.54289	ENSMUSG00000020646	Mboat2	4.15663	ENSMUSG00000028003	Lrat	11.0256	ENSMUSG00000033088	Triobp	3.07974	ENSMUSG00000027962	Vcam1	7.53972
ENSMUSG00000019851	Perp	2.15846	ENSMUSG00000020808	Fam64a	4.34286	ENSMUSG00000020649	Rrm2	12.611	ENSMUSG00000028108	Ecm1	2.49485	ENSMUSG00000033427	Upb1	53.1707	ENSMUSG00000028003	Lrat	6.17949
ENSMUSG00000019916	P4ha1	2.10035	ENSMUSG00000020869	Lrrc59	2.19202	ENSMUSG00000020682	Mmp28	2.55967	ENSMUSG00000028194	Ddah1	3.33696	ENSMUSG00000033450	Tagap	4.31157	ENSMUSG00000028007	Snx7	2.05711
ENSMUSG00000019942	Cdk1	8.8866	ENSMUSG00000020897	Aurkb	8.56098	ENSMUSG00000020695	Mrc2	6.66	ENSMUSG00000028197	Col24a1	3.62201	ENSMUSG00000033576	Apol6	4.12121	ENSMUSG00000028108	Ecm1	2.67508
ENSMUSG00000019987	Arg1	4.06778	ENSMUSG00000020899	Pfas	2.04161	ENSMUSG00000020758	Itgb4	2.1707	ENSMUSG00000028367	Txn1	2.9696	ENSMUSG00000033644	Piwil2	3.02158	ENSMUSG00000028132	Tmem56	4.14778
ENSMUSG00000019990	Pde7b	20.0256	ENSMUSG00000020912	Krt12	13.8333	ENSMUSG00000020774	Aspa	2.79612	ENSMUSG00000028461	Ccdc107	7.47253	ENSMUSG00000033715	Akr1c14	11.522	ENSMUSG00000028161	Ppp3ca	2.08477
ENSMUSG00000019992	Mtfr2	5.52564	ENSMUSG00000020914	Top2a	7.43795	ENSMUSG00000020803	Txndc17	4.56464	ENSMUSG00000028488	Sh3gl2	3.04304	ENSMUSG00000034009	Rxfp1	2.71194	ENSMUSG00000028197	Col24a1	6.89474
ENSMUSG00000020018	Snrpf	2.81757	ENSMUSG00000020926	Adam11	3.05914	ENSMUSG00000020808	Fam64a	3.12381	ENSMUSG00000028766	Alpl	14.3268	ENSMUSG00000034117	Ptgdr2	3.62264	ENSMUSG00000028300	3110043O21Rik	2.09461
ENSMUSG00000020032	Nuak1	2.12394	ENSMUSG00000020935	Dcakd	2.17647	ENSMUSG00000020839	Tmigd1	2.43976	ENSMUSG00000028876	Epha10	5.12903	ENSMUSG00000034394	Lif	3.6302	ENSMUSG00000028328	Tmod1	3.68151
ENSMUSG00000020075	Ddx21	2.16131	ENSMUSG00000020974	Pole2	4.35849	ENSMUSG00000020869	Lrrc59	2.24178	ENSMUSG00000028893	Sesn2	2.52168	ENSMUSG00000034430	Zxdc	4.34922	ENSMUSG00000028358	Zfp618	2.99868
ENSMUSG00000020089	Ppa1	4.10902	ENSMUSG00000021109	Hif1a	5.23907	ENSMUSG00000020889	Nr1d1	5.75578	ENSMUSG00000028927	Padi2	117.612	ENSMUSG00000034612	Chst11	4.1514	ENSMUSG00000028469	Npr2	2.91354
ENSMUSG00000020116	Pno1	4.215	ENSMUSG00000021116	Eif2s1	2.5726	ENSMUSG00000020897	Aurkb	7.92683	ENSMUSG00000028963	Uts2	43.4	ENSMUSG00000035104	Eva1a	2.97802	ENSMUSG00000028488	Sh3gl2	5.82278
ENSMUSG00000020121	Srgap1	2.30727	ENSMUSG00000021123	Rdh12	16.6	ENSMUSG00000020912	Krt12	12.4167	ENSMUSG00000029005	Draxin	3.93333	ENSMUSG00000035107	Dcbld2	3.08438	ENSMUSG00000028647	Mycbp	2.04681
ENSMUSG00000020152	Actr2	2.02522	ENSMUSG00000021131	Erh	2.66506	ENSMUSG00000020914	Top2a	5.87949	ENSMUSG00000029123	Stk32b	15.4536	ENSMUSG00000035112	Wnk4	10.6761	ENSMUSG00000028766	Alpl	13.043
ENSMUSG00000020180	Snrpd3	2.43734	ENSMUSG00000021273	Fdft1	2.22432	ENSMUSG00000020919	Stat5b	2.73969	ENSMUSG00000029193	Cckar	42.5	ENSMUSG00000036006	Fam65b	4.31145	ENSMUSG00000028927	Padi2	181.939
ENSMUSG00000020185	E2f7	15.5974	ENSMUSG00000021288	Klc1	2.53876	ENSMUSG00000020926	Adam11	2.91935	ENSMUSG00000029322	Plac8	2.39759	ENSMUSG00000036040	Adamtsl2	5.65079	ENSMUSG00000028944	Prkag2	2.26025
ENSMUSG00000020186	Csrp2	12.808	ENSMUSG00000021368	Tbc1d7	2.13559	ENSMUSG00000020974	Pole2	4.33208	ENSMUSG00000029372	Ppbp	681.905	ENSMUSG00000036381	P2ry14	15.5266	ENSMUSG00000028957	Per3	2.85372
ENSMUSG00000020219	Timm13	2.63744	ENSMUSG00000021391	Cenpp	6.7	ENSMUSG00000021024	Psma6	2.29549	ENSMUSG00000029377	Ereg	17.391	ENSMUSG00000036402	Gng12	6.7221	ENSMUSG00000028961	Pgd	2.02601
ENSMUSG00000020224	Llph	2.48223	ENSMUSG00000021457	Syk	3.30568	ENSMUSG00000021048	Mthfd1	2.17802	ENSMUSG00000029484	Anxa3	2.60747	ENSMUSG00000036412	Arsi	2.02086	ENSMUSG00000029005	Draxin	4.6
ENSMUSG00000020256	Aldh1l2	5.16456	ENSMUSG00000021464	Ror2	4.04729	ENSMUSG00000021054	Sgpp1	2.11869	ENSMUSG00000029711	Epo	2.82192	ENSMUSG00000036523	Greb1	6.80056	ENSMUSG00000029086	Prom1	3.52866
ENSMUSG00000020267	Hint1	2.35997	ENSMUSG00000021485	Mxd3	2.40561	ENSMUSG00000021109	Hif1a	3.45035	ENSMUSG00000029878	Dbpht2	16.2373	ENSMUSG00000036545	Adamts2	3.74953	ENSMUSG00000029088	Kcnip4	3.03333
ENSMUSG00000020290	Xpo1	2.01895	ENSMUSG00000021486	Prelid1	2.25161	ENSMUSG00000021116	Eif2s1	2.28891	ENSMUSG00000030111	A2m	50.7586	ENSMUSG00000036931	Nfkbid	2.30435	ENSMUSG00000029123	Stk32b	20.1649
ENSMUSG00000020307	Cdc34	2.76727	ENSMUSG00000021493	Pdlim7	2.58438	ENSMUSG00000021123	Rdh12	14.5517	ENSMUSG00000030166	Rad52	2.80064	ENSMUSG00000037035	Inhbb	10.9376	ENSMUSG00000029193	Cckar	52.6667
ENSMUSG00000020323	Prss57	2.16716	ENSMUSG00000021506	Pitx1	2.25295	ENSMUSG00000021131	Erh	2.2923	ENSMUSG00000030319	Cand2	2.49795	ENSMUSG00000037138	Aff3	3.84273	ENSMUSG00000029228	Lnx1	2.7232
ENSMUSG00000020325	Fstl3	2.31387	ENSMUSG00000021508	Cxcl14	6.82112	ENSMUSG00000021288	Klc1	2.43994	ENSMUSG00000030538	Cib1	2.63948	ENSMUSG00000037161	Mgarp	3.51724	ENSMUSG00000029377	Ereg	16.2218
ENSMUSG00000020328	Nudcd2	3.43141	ENSMUSG00000021509	Slc25a48	8.51493	ENSMUSG00000021391	Cenpp	3.71667	ENSMUSG00000030623	Prss23os	2.48832	ENSMUSG00000037362	Nov	4.65563	ENSMUSG00000029484	Anxa3	5.57472
ENSMUSG00000020330	Hmmr	8.7012	ENSMUSG00000021569	Trip13	4.22222	ENSMUSG00000021411	Pxdc1	3.16302	ENSMUSG00000030677	Kif22	3.81481	ENSMUSG00000037406	Htra4	3.38525	ENSMUSG00000029878	Dbpht2	19.1356
ENSMUSG00000020358	Hnrnpab	2.11672	ENSMUSG00000021607	Mrpl36	2.375	ENSMUSG00000021457	Syk	2.9607	ENSMUSG00000030854	Ptpn5	9.16949	ENSMUSG00000037685	Atp8a1	6.93157	ENSMUSG00000029910	Mad2l1	4.60284
ENSMUSG00000020361	Hspa4	3.24997	ENSMUSG00000021670	Hmgcr	2.60972	ENSMUSG00000021464	Ror2	2.08623	ENSMUSG00000031089	Slc6a14	24.0769	ENSMUSG00000037816	Fbxw17	3.85674	ENSMUSG00000029999	Tgfa	2.64646
ENSMUSG00000020362	Cnot6	2.18794	ENSMUSG00000021697	Depdc1b	6.90244	ENSMUSG00000021485	Mxd3	2.33163	ENSMUSG00000031231	Cox7b	2.63615	ENSMUSG00000038156	Spon1	6.24029	ENSMUSG00000030104	Edem1	2.15779
ENSMUSG00000020392	Cdkn2aipnl	2.25416	ENSMUSG00000021707	Dhfr	2.67674	ENSMUSG00000021486	Prelid1	2.05021	ENSMUSG00000031388	Naa10	2.3246	ENSMUSG00000038311	2410017I17Rik	2.27737	ENSMUSG00000030111	A2m	48.3793
ENSMUSG00000020402	Vdac1	2.19431	ENSMUSG00000021714	Cenpk	3.46721	ENSMUSG00000021508	Cxcl14	6.02385	ENSMUSG00000031389	Arhgap4	2.23559	ENSMUSG00000038375	Trp53inp2	3.35765	ENSMUSG00000030166	Rad52	2.89339
ENSMUSG00000020411	Nipal4	8.14894	ENSMUSG00000021737	Psmd6	2.10883	ENSMUSG00000021509	Slc25a48	10.6119	ENSMUSG00000031490	Eif4ebp1	3.48958	ENSMUSG00000038400	Pmepa1	3.55047	ENSMUSG00000030254	Rad18	3.75366
ENSMUSG00000020415	Pttg1	6.42286	ENSMUSG00000021811	Dnajc9	2.0083	ENSMUSG00000021569	Trip13	4.8547	ENSMUSG00000031802	Phxr4	3.65	ENSMUSG00000039109	F13a1	9.02857	ENSMUSG00000030623	Prss23os	3.00597
ENSMUSG00000020493	Prr11	5.41304	ENSMUSG00000021846	Peli2	3.77168	ENSMUSG00000021607	Mrpl36	2.36699	ENSMUSG00000031807	Pgls	3.78261	ENSMUSG00000039254	Pomt1	3.40789	ENSMUSG00000030739	Myh14	3.1358
ENSMUSG00000020514	Mrpl22	2.18824	ENSMUSG00000021868	Ppif	2.46607	ENSMUSG00000021640	Naip1	2.72222	ENSMUSG00000031870	Pgr	4.80621	ENSMUSG00000039313	AF529169	2.08744	ENSMUSG00000030854	Ptpn5	7.39407
ENSMUSG00000020527	Myo19	2.49445	ENSMUSG00000021951	Eef1akmt1	2.4009	ENSMUSG00000021697	Depdc1b	4.97561	ENSMUSG00000031891	Hsd11b2	43.7727	ENSMUSG00000039405	Prss23	3.6125	ENSMUSG00000031284	Pak3	2.90735
ENSMUSG00000020592	Sdc1	2.8455	ENSMUSG00000021965	Ska3	3.81395	ENSMUSG00000021701	Plk2	3.25217	ENSMUSG00000031932	Gpr83	64.78	ENSMUSG00000039476	Prrx2	3.50651	ENSMUSG00000031400	G6pdx	2.97541
ENSMUSG00000020614	Fam20a	7.19565	ENSMUSG00000021996	Esd	2.37196	ENSMUSG00000021707	Dhfr	3.48338	ENSMUSG00000031980	Agt	8.95833	ENSMUSG00000039529	Atp8b1	4.10039	ENSMUSG00000031451	Gas6	2.43684
ENSMUSG00000020646	Mboat2	3.34079	ENSMUSG00000022021	Diaph3	6.81208	ENSMUSG00000021714	Cenpk	3.17213	ENSMUSG00000032011	Thy1	3.47558	ENSMUSG00000039579	Grin3a	11.0303	ENSMUSG00000031490	Eif4ebp1	2.39323
ENSMUSG00000020649	Rrm2	15.5601	ENSMUSG00000022033	Pbk	7.30872	ENSMUSG00000021719	Rgs7bp	2.8375	ENSMUSG00000032060	Cryab	2.67282	ENSMUSG00000039621	Prex1	5.7458	ENSMUSG00000031821	Gins2	2.29213
ENSMUSG00000020650	Bcap29	2.02484	ENSMUSG00000022034	Esco2	4.18644	ENSMUSG00000021743	Fezf2	25.375	ENSMUSG00000032313	Tmem266	5.98404	ENSMUSG00000039683	Sdk1	2.91524	ENSMUSG00000031822	Gse1	2.34875
ENSMUSG00000020682	Mmp28	2.50206	ENSMUSG00000022040	Ephx2	2.75248	ENSMUSG00000021792	Fam213a	2.30195	ENSMUSG00000032359	Ctsh	2.09781	ENSMUSG00000040111	Gramd1b	2.24205	ENSMUSG00000031870	Pgr	11.6382
ENSMUSG00000020695	Mrc2	6.832	ENSMUSG00000022090	Pdlim2	2.59659	ENSMUSG00000021794	Glud1	2.26347	ENSMUSG00000032374	Plod2	3.55963	ENSMUSG00000040212	Emp3	2.16746	ENSMUSG00000031891	Hsd11b2	44.8409
ENSMUSG00000020708	Psmc5	2.30618	ENSMUSG00000022096	Hr	2.30261	ENSMUSG00000021822	Plau	2.99189	ENSMUSG00000032452	Clstn2	3.80894	ENSMUSG00000040265	Dnm3	3.86661	ENSMUSG00000031932	Gpr83	176.24
ENSMUSG00000020720	Psmd12	2.27261	ENSMUSG00000022098	Bmp1	2.85167	ENSMUSG00000021846	Peli2	4.31185	ENSMUSG00000032548	Slco2a1	13.2434	ENSMUSG00000040548	Tex2	2.34091	ENSMUSG00000031983	2310022B05Rik	2.31132
ENSMUSG00000020758	Itgb4	2.01984	ENSMUSG00000022111	Uchl3	2.699	ENSMUSG00000021868	Ppif	2.1767	ENSMUSG00000032572	Col6a4	18.9895	ENSMUSG00000040675	Mthfd1l	4.15347	ENSMUSG00000032011	Thy1	3.11896
ENSMUSG00000020774	Aspa	3.3301	ENSMUSG00000022144	Gdnf	5.48889	ENSMUSG00000021965	Ska3	4.24031	ENSMUSG00000032640	Chsy1	2.37586	ENSMUSG00000040811	Eml2	4.41667	ENSMUSG00000032313	Tmem266	5.55851
ENSMUSG00000020803	Txndc17	5.62223	ENSMUSG00000022180	Slc7a8	5.0531	ENSMUSG00000021996	Esd	2.73271	ENSMUSG00000032649	Colgalt2	6.24188	ENSMUSG00000040829	Zmynd15	3.20426	ENSMUSG00000032369	Plscr1	2.3905
ENSMUSG00000020808	Fam64a	3.88571	ENSMUSG00000022186	Oxct1	2.366	ENSMUSG00000022021	Diaph3	6.0783	ENSMUSG00000032715	Trib3	2.31373	ENSMUSG00000041046	Ramp3	34.0691	ENSMUSG00000032374	Plod2	6.11832
ENSMUSG00000020839	Tmigd1	3.77108	ENSMUSG00000022231	Sema5a	5.17385	ENSMUSG00000022033	Pbk	6.84564	ENSMUSG00000032726	Bmp8a	39.2787	ENSMUSG00000041347	Bdkrb1	8.08368	ENSMUSG00000032376	Usp3	2.0065
ENSMUSG00000020857	Nme2	2.24158	ENSMUSG00000022240	Ctnnd2	2.78947	ENSMUSG00000022034	Esco2	3.53814	ENSMUSG00000032806	Slc10a3	3.14375	ENSMUSG00000041710	Trpc5	2.26941	ENSMUSG00000032452	Clstn2	3.45528
ENSMUSG00000020869	Lrrc59	2.74638	ENSMUSG00000022241	Tars	2.44199	ENSMUSG00000022090	Pdlim2	2.86932	ENSMUSG00000032841	Prr5l	3.90566	ENSMUSG00000041794	Myrip	25.3019	ENSMUSG00000032548	Slco2a1	10.3315
ENSMUSG00000020897	Aurkb	8.13821	ENSMUSG00000022297	Fzd6	3.17335	ENSMUSG00000022098	Bmp1	2.88114	ENSMUSG00000033450	Tagap	2.48961	ENSMUSG00000041920	Slc16a6	9.13139	ENSMUSG00000032572	Col6a4	36.1061
ENSMUSG00000020912	Krt12	16.2222	ENSMUSG00000022322	Shcbp1	7.72441	ENSMUSG00000022111	Uchl3	3.06	ENSMUSG00000033576	Apol6	4.70455	ENSMUSG00000042190	Cmklr1	3.75107	ENSMUSG00000032640	Chsy1	3.45569
ENSMUSG00000020914	Top2a	6.4559	ENSMUSG00000022325	Pop1	2.50357	ENSMUSG00000022180	Slc7a8	3.85398	ENSMUSG00000033715	Akr1c14	5.88753	ENSMUSG00000042249	Grk3	3.1901	ENSMUSG00000032649	Colgalt2	14.3755
ENSMUSG00000020919	Stat5b	2.20728	ENSMUSG00000022351	Sqle	2.9897	ENSMUSG00000022186	Oxct1	2.28734	ENSMUSG00000034117	Ptgdr2	8.88679	ENSMUSG00000042254	Cilp	20.7128	ENSMUSG00000032726	Bmp8a	53.3279
ENSMUSG00000020935	Dcakd	2.20209	ENSMUSG00000022353	Mtss1	2.16385	ENSMUSG00000022218	Tgm1	6.78018	ENSMUSG00000034212	Ankmy1	2.20192	ENSMUSG00000042289	Hsd3b7	2.49038	ENSMUSG00000032806	Slc10a3	2.475
ENSMUSG00000020974	Pole2	4.96981	ENSMUSG00000022360	Atad2	2.38252	ENSMUSG00000022231	Sema5a	5.36881	ENSMUSG00000034255	Arhgap27	2.85795	ENSMUSG00000042793	Lgr6	25.1964	ENSMUSG00000032841	Prr5l	3.27673
ENSMUSG00000021024	Psma6	2.96579	ENSMUSG00000022385	Gtse1	2.41143	ENSMUSG00000022241	Tars	2.07455	ENSMUSG00000034394	Lif	2.77462	ENSMUSG00000044041	Krt13	8.66	ENSMUSG00000033088	Triobp	2.65105
ENSMUSG00000021048	Mthfd1	2.08169	ENSMUSG00000022391	Rangap1	4.1096	ENSMUSG00000022297	Fzd6	2.99678	ENSMUSG00000034430	Zxdc	2.41075	ENSMUSG00000044217	Aqp5	8.67647	ENSMUSG00000033450	Tagap	4.38872
ENSMUSG00000021054	Sgpp1	2.4842	ENSMUSG00000022421	Nptxr	2.56352	ENSMUSG00000022322	Shcbp1	6.50394	ENSMUSG00000034452	Slc24a1	4.08	ENSMUSG00000044499	Hs3st5	2.96273	ENSMUSG00000033576	Apol6	7.08333
ENSMUSG00000021109	Hif1a	4.91545	ENSMUSG00000022422	Dscc1	3.63441	ENSMUSG00000022325	Pop1	2.27143	ENSMUSG00000034456	Uroc1	42.6667	ENSMUSG00000044734	Serpinb1a	2.66462	ENSMUSG00000033715	Akr1c14	12.6996
ENSMUSG00000021116	Eif2s1	2.838	ENSMUSG00000022451	Twf1	2.22446	ENSMUSG00000022330	Osr2	3.06593	ENSMUSG00000034686	Prr7	5.95238	ENSMUSG00000045038	Prkce	3.03052	ENSMUSG00000034117	Ptgdr2	7.53774
ENSMUSG00000021123	Rdh12	16.4069	ENSMUSG00000022503	Nubp1	2.43838	ENSMUSG00000022340	Sybu	4.28571	ENSMUSG00000034786	Gpsm3	4.98611	ENSMUSG00000045083	Lingo2	8.06452	ENSMUSG00000034255	Arhgap27	2.51705
ENSMUSG00000021131	Erh	2.87552	ENSMUSG00000022510	Trp63	2.10691	ENSMUSG00000022351	Sqle	2.43428	ENSMUSG00000034926	Dhcr24	6.31884	ENSMUSG00000045092	S1pr1	2.87255	ENSMUSG00000034265	Zdhhc14	2.79787
ENSMUSG00000021178	Psmc1	2.05928	ENSMUSG00000022557	Bop1	2.61441	ENSMUSG00000022353	Mtss1	2.84603	ENSMUSG00000034932	Mrpl54	4.37872	ENSMUSG00000045312	Lhfpl2	5.41316	ENSMUSG00000034394	Lif	4.17287
ENSMUSG00000021273	Fdft1	2.23352	ENSMUSG00000022673	Mcm4	3.49485	ENSMUSG00000022360	Atad2	2.45264	ENSMUSG00000035104	Eva1a	2.82967	ENSMUSG00000045629	Sh3tc2	5	ENSMUSG00000034430	Zxdc	3.90095
ENSMUSG00000021288	Klc1	2.53462	ENSMUSG00000022678	Nde1	2.19532	ENSMUSG00000022378	Fam49b	2.48851	ENSMUSG00000035107	Dcbld2	3.71444	ENSMUSG00000045915	Ccdc42	12.1429	ENSMUSG00000034612	Chst11	3.68753
ENSMUSG00000021361	Tmem14c	2.32015	ENSMUSG00000022754	Tmem45a	5.87712	ENSMUSG00000022391	Rangap1	3.26045	ENSMUSG00000035112	Wnk4	3.63028	ENSMUSG00000046056	Sbsn	4.96933	ENSMUSG00000034686	Prr7	5.41497
ENSMUSG00000021376	Tpmt	3.18421	ENSMUSG00000022797	Tfrc	2.79113	ENSMUSG00000022422	Dscc1	3.91398	ENSMUSG00000035202	Lars2	4.83947	ENSMUSG00000046516	Cox17	2.15517	ENSMUSG00000034926	Dhcr24	2.56812
ENSMUSG00000021379	Id4	2.60636	ENSMUSG00000022814	Umps	2.507	ENSMUSG00000022451	Twf1	2.13253	ENSMUSG00000035295	Wdr38	2.88028	ENSMUSG00000046818	Ddit4l	18.6038	ENSMUSG00000035104	Eva1a	3
ENSMUSG00000021391	Cenpp	5.43333	ENSMUSG00000022822	Abcc5	2.13768	ENSMUSG00000022503	Nubp1	2.11544	ENSMUSG00000035373	Ccl7	3.8396	ENSMUSG00000047641	Krt87	145.61	ENSMUSG00000035107	Dcbld2	4.15768
ENSMUSG00000021451	Sema4d	2.61151	ENSMUSG00000022913	Psmg1	2.17657	ENSMUSG00000022557	Bop1	2.38113	ENSMUSG00000035557	Krt17	7.07792	ENSMUSG00000047787	Flrt1	2.92318	ENSMUSG00000035112	Wnk4	5.36268
ENSMUSG00000021457	Syk	3.11354	ENSMUSG00000022945	Chaf1b	3.84286	ENSMUSG00000022596	Slurp1	2.35955	ENSMUSG00000035674	Ndufa3	4	ENSMUSG00000048120	Entpd1	2.92712	ENSMUSG00000035722	Abca7	2.27795
ENSMUSG00000021469	Msx2	2.1639	ENSMUSG00000022962	Gart	2.47139	ENSMUSG00000022661	Cd200	3.40568	ENSMUSG00000035861	Tmprss11b	7.12987	ENSMUSG00000048450	Msx1	3.96154	ENSMUSG00000035916	Ptprq	4.8875
ENSMUSG00000021474	Sfxn1	2.1731	ENSMUSG00000022986	Krt75	2.87006	ENSMUSG00000022673	Mcm4	4.16953	ENSMUSG00000035916	Ptprq	3.8375	ENSMUSG00000048616	Nog	6.50806	ENSMUSG00000036006	Fam65b	4.94504
ENSMUSG00000021485	Mxd3	2.96939	ENSMUSG00000022995	Enah	3.12439	ENSMUSG00000022744	Cldnd1	2.18271	ENSMUSG00000036006	Fam65b	2.43664	ENSMUSG00000049112	Oxtr	29.6054	ENSMUSG00000036040	Adamtsl2	11.2222
ENSMUSG00000021486	Prelid1	2.58121	ENSMUSG00000023015	Racgap1	6.92532	ENSMUSG00000022754	Tmem45a	6.34463	ENSMUSG00000036040	Adamtsl2	6.63492	ENSMUSG00000049420	Tmem200a	10.2968	ENSMUSG00000036046	5031439G07Rik	2.03214
ENSMUSG00000021493	Pdlim7	2.83958	ENSMUSG00000023041	Krt6b	115.518	ENSMUSG00000022787	Wdr53	2.31047	ENSMUSG00000036046	5031439G07Rik	2.4556	ENSMUSG00000049866	Arl4c	3.93616	ENSMUSG00000036062	Phf24	5.04867
ENSMUSG00000021506	Pitx1	2.4173	ENSMUSG00000023067	Cdkn1a	3.28291	ENSMUSG00000022797	Tfrc	3.39975	ENSMUSG00000036062	Phf24	2.44248	ENSMUSG00000050010	Shisa3	4.66312	ENSMUSG00000036381	P2ry14	8.5373
ENSMUSG00000021508	Cxcl14	3.53492	ENSMUSG00000023259	Slc26a6	3.41667	ENSMUSG00000022945	Chaf1b	4.13214	ENSMUSG00000036256	Igfbp7	2.24214	ENSMUSG00000050272	Dscam	4.58672	ENSMUSG00000036402	Gng12	3.86558
ENSMUSG00000021509	Slc25a48	8.14179	ENSMUSG00000023345	Poc1a	2.625	ENSMUSG00000022962	Gart	2.31157	ENSMUSG00000036305	Rpl39-ps	7.13924	ENSMUSG00000050377	Il31ra	13.0822	ENSMUSG00000036523	Greb1	14.1057
ENSMUSG00000021550	2210016F16Rik	2.37093	ENSMUSG00000023391	Dlx2	29.8198	ENSMUSG00000022978	Mis18a	2.69198	ENSMUSG00000036372	Tmem258	2.88802	ENSMUSG00000050953	Gja1	2.17454	ENSMUSG00000036545	Adamts2	4.05524
ENSMUSG00000021569	Trip13	5.29487	ENSMUSG00000023456	Tpi1	2.02156	ENSMUSG00000022995	Enah	3.43348	ENSMUSG00000036381	P2ry14	5.82771	ENSMUSG00000051048	P4ha3	4.16261	ENSMUSG00000036856	Wnt4	2.75744
ENSMUSG00000021591	Glrx	2.58934	ENSMUSG00000023505	Cdca3	13.2663	ENSMUSG00000023015	Racgap1	5.25325	ENSMUSG00000036402	Gng12	2.38412	ENSMUSG00000051279	Gdf6	11.719	ENSMUSG00000037035	Inhbb	8.42086
ENSMUSG00000021606	Ndufs6	2.3567	ENSMUSG00000023905	Tnfrsf12a	2.53978	ENSMUSG00000023041	Krt6b	67.2133	ENSMUSG00000036523	Greb1	7.37068	ENSMUSG00000052105	Mtcl1	3.88144	ENSMUSG00000037138	Aff3	2.50166
ENSMUSG00000021607	Mrpl36	2.97596	ENSMUSG00000023908	Pkmyt1	2.40836	ENSMUSG00000023067	Cdkn1a	5.12644	ENSMUSG00000036545	Adamts2	3.86902	ENSMUSG00000052848	C130026L21Rik	50.1111	ENSMUSG00000037225	Fgf2	2.26808
ENSMUSG00000021645	Smn1	2.28447	ENSMUSG00000023940	Sgol1	4.93671	ENSMUSG00000023075	Akirin1	2.80189	ENSMUSG00000036751	Cox6b1	3.26667	ENSMUSG00000052854	Nrk	4.98992	ENSMUSG00000037362	Nov	4.26916
ENSMUSG00000021670	Hmgcr	2.96285	ENSMUSG00000023942	Slc29a1	3.20259	ENSMUSG00000023094	Msrb2	2.65909	ENSMUSG00000036931	Nfkbid	2.55435	ENSMUSG00000053414	Hunk	2.83756	ENSMUSG00000037379	Spon2	2.40187
ENSMUSG00000021707	Dhfr	3.6435	ENSMUSG00000023988	Bysl	2.34703	ENSMUSG00000023345	Poc1a	2.30556	ENSMUSG00000037035	Inhbb	5.91586	ENSMUSG00000053442	4930597O21Rik	6.21633	ENSMUSG00000037544	Dlgap5	6.73611
ENSMUSG00000021714	Cenpk	3.90984	ENSMUSG00000024007	Ppil1	2.67123	ENSMUSG00000023505	Cdca3	9.44565	ENSMUSG00000037362	Nov	2.9059	ENSMUSG00000053746	Ptrh1	2.22414	ENSMUSG00000037685	Atp8a1	6.06953
ENSMUSG00000021719	Rgs7bp	5.5625	ENSMUSG00000024008	Cpne5	4.40426	ENSMUSG00000023723	Mrps23	2.18362	ENSMUSG00000037379	Spon2	2.79729	ENSMUSG00000053797	Krt16	5.6729	ENSMUSG00000037816	Fbxw17	4.13617
ENSMUSG00000021737	Psmd6	2.67185	ENSMUSG00000024056	Ndc80	5.54321	ENSMUSG00000023868	Pde10a	4.78182	ENSMUSG00000037685	Atp8a1	3.1896	ENSMUSG00000054453	Sytl5	4	ENSMUSG00000037852	Cpe	2.66405
ENSMUSG00000021773	Comtd1	2.005	ENSMUSG00000024066	Xdh	2.90195	ENSMUSG00000023885	Thbs2	2.72082	ENSMUSG00000037816	Fbxw17	2.71348	ENSMUSG00000054619	Mettl7a1	2.25308	ENSMUSG00000037885	Stk35	2.51053
ENSMUSG00000021811	Dnajc9	2.121	ENSMUSG00000024158	Hagh	3.74264	ENSMUSG00000023905	Tnfrsf12a	2.93448	ENSMUSG00000038156	Spon1	5.4793	ENSMUSG00000054675	Tmem119	4.45447	ENSMUSG00000037965	Zc3h7a	2.19527
ENSMUSG00000021846	Peli2	4.57836	ENSMUSG00000024208	Uqcc2	2.66917	ENSMUSG00000023908	Pkmyt1	2.02894	ENSMUSG00000038252	Ncapd2	3.91563	ENSMUSG00000054720	Lrrc8c	2.48489	ENSMUSG00000038145	Snrk	3.24895
ENSMUSG00000021868	Ppif	2.34955	ENSMUSG00000024268	Celf4	3.5209	ENSMUSG00000023918	Adgrf4	3.63014	ENSMUSG00000038352	Arl5c	5.28194	ENSMUSG00000055022	Cntn1	4.1567	ENSMUSG00000038156	Spon1	9.37192
ENSMUSG00000021951	Eef1akmt1	2.65315	ENSMUSG00000024270	Slc39a6	3.84818	ENSMUSG00000023940	Sgol1	4.8038	ENSMUSG00000038375	Trp53inp2	2.76346	ENSMUSG00000055866	Per2	4.75327	ENSMUSG00000038352	Arl5c	2.90749
ENSMUSG00000021965	Ska3	4.55814	ENSMUSG00000024301	Kifc5b	3.35185	ENSMUSG00000023942	Slc29a1	2.25442	ENSMUSG00000038400	Pmepa1	2.88391	ENSMUSG00000056481	Cd248	2.08124	ENSMUSG00000038372	Gmds	2.35273
ENSMUSG00000021967	Mrpl57	2.78345	ENSMUSG00000024331	Dsc2	13.5333	ENSMUSG00000023988	Bysl	2.2627	ENSMUSG00000038456	Dennd2a	2.67987	ENSMUSG00000056486	Chn1	2.74	ENSMUSG00000038375	Trp53inp2	2.93839
ENSMUSG00000021996	Esd	2.86495	ENSMUSG00000024424	Ttc39c	4.86946	ENSMUSG00000024007	Ppil1	2.58356	ENSMUSG00000038690	Atp5j2	2.78512	ENSMUSG00000056612	Ppp1r14b	2.12088	ENSMUSG00000038400	Pmepa1	3.36376
ENSMUSG00000022021	Diaph3	6.05817	ENSMUSG00000024590	Lmnb1	2.54216	ENSMUSG00000024008	Cpne5	6.25532	ENSMUSG00000038717	Atp5l	2.63677	ENSMUSG00000056643	Chst13	1110	ENSMUSG00000038456	Dennd2a	3.45909
ENSMUSG00000022033	Pbk	7.79866	ENSMUSG00000024640	Psat1	5.17888	ENSMUSG00000024014	Pim1	3.58319	ENSMUSG00000038732	Mboat1	3.42475	ENSMUSG00000057262	Gm10020	4.22	ENSMUSG00000038457	Tmem255b	2.63673
ENSMUSG00000022034	Esco2	4.35169	ENSMUSG00000024660	Incenp	4.36251	ENSMUSG00000024026	Glo1	2.14788	ENSMUSG00000038807	Rap1gap2	2.31419	ENSMUSG00000058056	Palld	2.06062	ENSMUSG00000038550	Ciart	3.39437
ENSMUSG00000022070	Bora	2.38462	ENSMUSG00000024664	Fads3	11.8281	ENSMUSG00000024056	Ndc80	5.09877	ENSMUSG00000039109	F13a1	11.1714	ENSMUSG00000058057	Mettl7a3	7.55172	ENSMUSG00000038732	Mboat1	3.82609
ENSMUSG00000022090	Pdlim2	3.16477	ENSMUSG00000024691	Fam111a	5.23838	ENSMUSG00000024066	Xdh	2.33398	ENSMUSG00000039221	Rpl22l1	2.13233	ENSMUSG00000058354	Krt6a	11.1484	ENSMUSG00000038807	Rap1gap2	3.14085
ENSMUSG00000022111	Uchl3	4.67	ENSMUSG00000024732	Ccdc86	2.53963	ENSMUSG00000024158	Hagh	3.55504	ENSMUSG00000039254	Pomt1	3.20614	ENSMUSG00000059602	Syn3	2.93562	ENSMUSG00000039098	Gm9767	7.55
ENSMUSG00000022180	Slc7a8	4.92478	ENSMUSG00000024736	Tmem132a	2.15137	ENSMUSG00000024208	Uqcc2	2.34962	ENSMUSG00000039323	Igfbp2	10.1919	ENSMUSG00000059751	Rps3a3	3.74303	ENSMUSG00000039109	F13a1	13.7714
ENSMUSG00000022186	Oxct1	2.13593	ENSMUSG00000024742	Fen1	3.90457	ENSMUSG00000024222	Fkbp5	2.88031	ENSMUSG00000039405	Prss23	2.64819	ENSMUSG00000059810	Rgs3	3.02037	ENSMUSG00000039254	Pomt1	4.34503
ENSMUSG00000022193	Psmb5	2.58896	ENSMUSG00000024772	Ehd1	2.51724	ENSMUSG00000024268	Celf4	4.17524	ENSMUSG00000039476	Prrx2	3.69899	ENSMUSG00000059824	Dbp	9.07977	ENSMUSG00000039313	AF529169	3.41176
ENSMUSG00000022218	Tgm1	7.34943	ENSMUSG00000024791	Cdca5	5.925	ENSMUSG00000024270	Slc39a6	3.10829	ENSMUSG00000039579	Grin3a	13.7576	ENSMUSG00000060275	Nrg2	3.80786	ENSMUSG00000039323	Igfbp2	4.63953
ENSMUSG00000022221	Ripk3	2.35806	ENSMUSG00000024795	Kif20b	4.4881	ENSMUSG00000024301	Kifc5b	2.7963	ENSMUSG00000039683	Sdk1	3.66762	ENSMUSG00000060402	Chst8	4.19192	ENSMUSG00000039384	Dusp10	3.1248
ENSMUSG00000022231	Sema5a	6.10963	ENSMUSG00000024844	Banf1	2.4881	ENSMUSG00000024331	Dsc2	11.554	ENSMUSG00000040111	Gramd1b	3.81785	ENSMUSG00000060924	Csmd1	2.80271	ENSMUSG00000039405	Prss23	3.02015
ENSMUSG00000022240	Ctnnd2	2.16917	ENSMUSG00000024846	Cst6	11.2222	ENSMUSG00000024424	Ttc39c	5.64569	ENSMUSG00000040212	Emp3	2.33152	ENSMUSG00000061601	Pclo	3.39542	ENSMUSG00000039476	Prrx2	3.54559
ENSMUSG00000022241	Tars	2.59682	ENSMUSG00000024883	Rin1	2.06355	ENSMUSG00000024486	Hbegf	2.53571	ENSMUSG00000040265	Dnm3	4.44813	ENSMUSG00000062515	Fabp4	6.72519	ENSMUSG00000039529	Atp8b1	4.34949
ENSMUSG00000022247	Brix1	2.02873	ENSMUSG00000024899	Papss2	3.40179	ENSMUSG00000024565	Sall3	4.30405	ENSMUSG00000040605	Bace2	2.46181	ENSMUSG00000062960	Kdr	2.63236	ENSMUSG00000039542	Ncam1	2.05359
ENSMUSG00000022285	Ywhaz	2.05042	ENSMUSG00000024952	Rps6ka4	3.33728	ENSMUSG00000024590	Lmnb1	2.74412	ENSMUSG00000040675	Mthfd1l	2.9901	ENSMUSG00000062991	Nrg1	7.68982	ENSMUSG00000039579	Grin3a	20.7727
ENSMUSG00000022297	Fzd6	3.01362	ENSMUSG00000024966	Stip1	2.04659	ENSMUSG00000024640	Psat1	5.06422	ENSMUSG00000040808	S100g	38	ENSMUSG00000063713	Klk1b24	2065	ENSMUSG00000039621	Prex1	4.50522
ENSMUSG00000022300	Dcaf13	2.05305	ENSMUSG00000024968	Rcor2	3.20755	ENSMUSG00000024660	Incenp	3.38208	ENSMUSG00000040811	Eml2	4.7822	ENSMUSG00000064080	Fbln2	5.32768	ENSMUSG00000039683	Sdk1	4.70334
ENSMUSG00000022322	Shcbp1	7.48819	ENSMUSG00000024989	Cep55	8.7623	ENSMUSG00000024664	Fads3	11.4635	ENSMUSG00000041046	Ramp3	75.0772	ENSMUSG00000065529	Mir22	3.25	ENSMUSG00000039697	Ncoa7	2.21411
ENSMUSG00000022325	Pop1	2.48571	ENSMUSG00000025001	Hells	3.95344	ENSMUSG00000024691	Fam111a	5.28687	ENSMUSG00000041347	Bdkrb1	7.41841	ENSMUSG00000066516	Klk1b21	140.952	ENSMUSG00000039842	Mcph1	2.364
ENSMUSG00000022351	Sqle	3.4149	ENSMUSG00000025007	Aldh18a1	2.06241	ENSMUSG00000024732	Ccdc86	2.42888	ENSMUSG00000041540	Sox5	2.50142	ENSMUSG00000066752	Gm10176	4.94	ENSMUSG00000040111	Gramd1b	8.06357
ENSMUSG00000022360	Atad2	3.00262	ENSMUSG00000025027	Xpnpep1	2.03786	ENSMUSG00000024742	Fen1	4.5507	ENSMUSG00000041697	Cox6a1	2.92016	ENSMUSG00000067158	Col4a4	3.59094	ENSMUSG00000040265	Dnm3	6.41848
ENSMUSG00000022369	Mtbp	2.19926	ENSMUSG00000025064	Col17a1	3.333	ENSMUSG00000024747	Aldh1a7	2.87218	ENSMUSG00000041710	Trpc5	2.94521	ENSMUSG00000067219	Nipal1	5.12903	ENSMUSG00000040372	Gpr63	3.24429
ENSMUSG00000022370	Mrpl13	2.73958	ENSMUSG00000025066	Sfr1	2.0366	ENSMUSG00000024770	Lipn	13.2286	ENSMUSG00000041736	Tspo	4.74494	ENSMUSG00000067613	Krt83	166.667	ENSMUSG00000040543	Pitpnm3	3.07393
ENSMUSG00000022378	Fam49b	2.87101	ENSMUSG00000025105	Bnc1	4.57131	ENSMUSG00000024772	Ehd1	3.07075	ENSMUSG00000041794	Myrip	7.92453	ENSMUSG00000067614	Krt86	1945	ENSMUSG00000040548	Tex2	3.43275
ENSMUSG00000022385	Gtse1	2.10571	ENSMUSG00000025134	Alyref	2.08028	ENSMUSG00000024791	Cdca5	5.575	ENSMUSG00000041881	Ndufa7	3.36542	ENSMUSG00000067615	Krt81	2320	ENSMUSG00000040605	Bace2	2.93606
ENSMUSG00000022391	Rangap1	3.26271	ENSMUSG00000025154	Arhgap19	5.64851	ENSMUSG00000024795	Kif20b	3.45918	ENSMUSG00000041889	Shisa4	2.1383	ENSMUSG00000068122	Agtr2	8.76596	ENSMUSG00000040675	Mthfd1l	6.58911
ENSMUSG00000022422	Dscc1	4.70968	ENSMUSG00000025158	Rfng	2.22973	ENSMUSG00000024833	Pola2	2.30061	ENSMUSG00000041920	Slc16a6	9.30109	ENSMUSG00000068758	Il3ra	3.23164	ENSMUSG00000040811	Eml2	6.05114
ENSMUSG00000022427	Tomm22	2.67303	ENSMUSG00000025161	Slc16a3	12.9514	ENSMUSG00000024844	Banf1	2.67196	ENSMUSG00000041959	S100a10	2.17052	ENSMUSG00000069763	Tmem100	4.74827	ENSMUSG00000040829	Zmynd15	2.67872
ENSMUSG00000022451	Twf1	3.1	ENSMUSG00000025328	Padi3	12.0455	ENSMUSG00000024899	Papss2	3.57143	ENSMUSG00000042212	Sprr2d	125.238	ENSMUSG00000070462	Mesdc1	2.80446	ENSMUSG00000041046	Ramp3	65.187
ENSMUSG00000022503	Nubp1	2.34477	ENSMUSG00000025330	Padi4	7.57164	ENSMUSG00000024922	Ovol1	3.54762	ENSMUSG00000042249	Grk3	6.30469	ENSMUSG00000070473	Cldn3	6.32	ENSMUSG00000041220	Elovl6	3.2855
ENSMUSG00000022557	Bop1	2.3945	ENSMUSG00000025364	Pa2g4	2.71928	ENSMUSG00000024924	Vldlr	2.19282	ENSMUSG00000042251	Pm20d1	16.2273	ENSMUSG00000070867	Trabd2b	7.96144	ENSMUSG00000041347	Bdkrb1	5.69038
ENSMUSG00000022596	Slurp1	5.48315	ENSMUSG00000025395	Prim1	3.30811	ENSMUSG00000024952	Rps6ka4	3.36307	ENSMUSG00000042254	Cilp	18.2481	ENSMUSG00000071265	1700086L19Rik	12.0806	ENSMUSG00000041540	Sox5	3.88757
ENSMUSG00000022661	Cd200	3.60924	ENSMUSG00000025403	Shmt2	3.31978	ENSMUSG00000024968	Rcor2	2.18239	ENSMUSG00000042312	S100a13	5.36738	ENSMUSG00000071604	Fam189a2	5.96425	ENSMUSG00000041710	Trpc5	4.92237
ENSMUSG00000022673	Mcm4	4.63517	ENSMUSG00000025499	Hras	2.67793	ENSMUSG00000024989	Cep55	7.83607	ENSMUSG00000042532	Golga7b	17.25	ENSMUSG00000071679	Zcchc16	2.20631	ENSMUSG00000041794	Myrip	17.0755
ENSMUSG00000022744	Cldnd1	2.22123	ENSMUSG00000025574	Tk1	2.2211	ENSMUSG00000025001	Hells	5.22646	ENSMUSG00000042647	Acad12	2.29213	ENSMUSG00000071713	Csf2rb	3.38776	ENSMUSG00000041895	Wipi1	2.13082
ENSMUSG00000022754	Tmem45a	6.73588	ENSMUSG00000025630	Hprt	2.27475	ENSMUSG00000025027	Xpnpep1	2.20583	ENSMUSG00000042793	Lgr6	18.7887	ENSMUSG00000071714	Csf2rb2	6.52174	ENSMUSG00000041920	Slc16a6	8.06022
ENSMUSG00000022757	Tfg	2.13604	ENSMUSG00000025650	Col7a1	4.21186	ENSMUSG00000025037	Maoa	2.19318	ENSMUSG00000043483	Gm6863	2.99127	ENSMUSG00000073418	C4b	4.01172	ENSMUSG00000042190	Cmklr1	4.22918
ENSMUSG00000022797	Tfrc	3.6396	ENSMUSG00000025651	Uqcrc1	3.15088	ENSMUSG00000025064	Col17a1	3.16162	ENSMUSG00000043501	Lgals2	2.87805	ENSMUSG00000074207	Adh1	3.84573	ENSMUSG00000042249	Grk3	10.7682
ENSMUSG00000022814	Umps	2.36491	ENSMUSG00000025747	Tyms	4.01869	ENSMUSG00000025066	Sfr1	2.40612	ENSMUSG00000043633	Fam221b	2.73404	ENSMUSG00000074345	Tnfaip8l3	5.7552	ENSMUSG00000042251	Pm20d1	16.1591
ENSMUSG00000022881	Rfc4	2.03016	ENSMUSG00000025758	Plk4	3.1179	ENSMUSG00000025105	Bnc1	5.17975	ENSMUSG00000043801	Oaz1-ps	10	ENSMUSG00000074743	Thbd	3.20433	ENSMUSG00000042254	Cilp	24.9778
ENSMUSG00000022913	Psmg1	2.33786	ENSMUSG00000025817	Nudt5	2.00164	ENSMUSG00000025134	Alyref	2.20211	ENSMUSG00000044041	Krt13	32.07	ENSMUSG00000074971	Fibin	3.00314	ENSMUSG00000042751	Nmnat2	2.58036
ENSMUSG00000022945	Chaf1b	4.32143	ENSMUSG00000025872	Thoc3	2.20487	ENSMUSG00000025154	Arhgap19	4.90594	ENSMUSG00000044080	S100a1	6.14056	ENSMUSG00000075707	Dio3	9.31343	ENSMUSG00000042793	Lgr6	36.6964
ENSMUSG00000022962	Gart	2.32047	ENSMUSG00000025980	Hspd1	2.29608	ENSMUSG00000025158	Rfng	2.48048	ENSMUSG00000044285	Gm1821	2.71558	ENSMUSG00000076436	Oxct2a	12.5092	ENSMUSG00000043953	Ccrl2	4.27543
ENSMUSG00000022978	Mis18a	3.16878	ENSMUSG00000026000	Lancl1	2.86257	ENSMUSG00000025161	Slc16a3	10.5838	ENSMUSG00000044734	Serpinb1a	3.93047	ENSMUSG00000078117	Gm16485	6.68616	ENSMUSG00000044041	Krt13	4.61
ENSMUSG00000022986	Krt75	2.54802	ENSMUSG00000026039	Sgol2a	5.28205	ENSMUSG00000025328	Padi3	26.9545	ENSMUSG00000044894	Uqcrq	3.41545	ENSMUSG00000079465	Col4a3	4.33981	ENSMUSG00000044080	S100a1	2.29451
ENSMUSG00000022995	Enah	3.9941	ENSMUSG00000026073	Il1r2	68.2755	ENSMUSG00000025330	Padi4	14.0746	ENSMUSG00000045007	Tubg2	2.73333	ENSMUSG00000081223	Gm12247	5.08989	ENSMUSG00000044217	Aqp5	6.02941
ENSMUSG00000023015	Racgap1	5.70779	ENSMUSG00000026167	Wnt10a	2.96376	ENSMUSG00000025358	Cdk2	2.21586	ENSMUSG00000045092	S1pr1	10.6176	ENSMUSG00000082071	Pramel	1385	ENSMUSG00000044499	Hs3st5	3.16149
ENSMUSG00000023041	Krt6b	98.6053	ENSMUSG00000026192	Atic	2.16283	ENSMUSG00000025364	Pa2g4	2.43254	ENSMUSG00000045312	Lhfpl2	4.21887	ENSMUSG00000082319	Gm8822	2.71587	ENSMUSG00000044734	Serpinb1a	4.74847
ENSMUSG00000023067	Cdkn1a	4.85277	ENSMUSG00000026196	Bard1	5.04455	ENSMUSG00000025395	Prim1	3.47838	ENSMUSG00000045690	Wdr89	3.53984	ENSMUSG00000083382	Gm6433	6.88636	ENSMUSG00000045038	Prkce	2.76704
ENSMUSG00000023075	Akirin1	2.31875	ENSMUSG00000026202	Tuba4a	4.39493	ENSMUSG00000025403	Shmt2	2.49088	ENSMUSG00000045915	Ccdc42	13.6667	ENSMUSG00000085080	2310044K18Rik	3.17544	ENSMUSG00000045083	Lingo2	7.83871
ENSMUSG00000023094	Msrb2	2.47727	ENSMUSG00000026220	Slc16a14	6.47165	ENSMUSG00000025499	Hras	2.558	ENSMUSG00000046056	Sbsn	4.22086	ENSMUSG00000085083	Gm11615	12.3333	ENSMUSG00000045092	S1pr1	16.3333
ENSMUSG00000023104	Rfc2	2.05332	ENSMUSG00000026229	Psmd1	2.01258	ENSMUSG00000025507	Pidd1	2.11613	ENSMUSG00000046229	Scand1	3.60776	ENSMUSG00000085148	Mir22hg	3.14613	ENSMUSG00000045312	Lhfpl2	9.31007
ENSMUSG00000023106	Denr	2.10177	ENSMUSG00000026278	Bok	5.01633	ENSMUSG00000025630	Hprt	2.4918	ENSMUSG00000046330	Rpl37a	2.92622	ENSMUSG00000085314	Gm14866	4.52778	ENSMUSG00000045502	Hcar2	4.01515
ENSMUSG00000023259	Slc26a6	2.10185	ENSMUSG00000026341	Actr3	2.4962	ENSMUSG00000025650	Col7a1	3.15124	ENSMUSG00000046352	Gjb2	10.3793	ENSMUSG00000085363	Gm15478	5.5443	ENSMUSG00000045629	Sh3tc2	4.23729
ENSMUSG00000023456	Tpi1	2.16788	ENSMUSG00000026355	Mcm6	2.06571	ENSMUSG00000025651	Uqcrc1	2.52492	ENSMUSG00000046364	Rpl27a	2.61075	ENSMUSG00000085391	Gm16150	3.46032	ENSMUSG00000045867	Cradd	2.21451
ENSMUSG00000023505	Cdca3	11.1413	ENSMUSG00000026385	Dbi	2.36438	ENSMUSG00000025747	Tyms	3.92991	ENSMUSG00000046711	Hmga1	2.93211	ENSMUSG00000085526	Gm16083	3.00272	ENSMUSG00000045915	Ccdc42	17.0476
ENSMUSG00000023723	Mrps23	2.26271	ENSMUSG00000026413	Pkp1	4.74553	ENSMUSG00000025758	Plk4	3.46288	ENSMUSG00000046718	Bst2	6.99126	ENSMUSG00000086043	Gm12473	2.24267	ENSMUSG00000046056	Sbsn	3.04294
ENSMUSG00000023832	Acat2	2.31768	ENSMUSG00000026415	Fcamr	4.06186	ENSMUSG00000025903	Lypla1	2.51736	ENSMUSG00000046721	Rpl14-ps1	3.82123	ENSMUSG00000086126	Evx1os	2.58185	ENSMUSG00000046169	Adamts6	2.92813
ENSMUSG00000023905	Tnfrsf12a	2.92824	ENSMUSG00000026421	Csrp1	2.38084	ENSMUSG00000025980	Hspd1	2.3438	ENSMUSG00000046818	Ddit4l	10.8324	ENSMUSG00000086356	Gm13441	2.86947	ENSMUSG00000046179	E2f8	3.87037
ENSMUSG00000023918	Adgrf4	4.4589	ENSMUSG00000026450	Chit1	3.68028	ENSMUSG00000026000	Lancl1	3.60325	ENSMUSG00000047281	Sfn	6.70583	ENSMUSG00000086373	Gm11978	22.1429	ENSMUSG00000046352	Gjb2	5.17241
ENSMUSG00000023940	Sgol1	5.91139	ENSMUSG00000026479	Lamc2	3.26041	ENSMUSG00000026039	Sgol2a	4.75092	ENSMUSG00000047641	Krt87	79.7561	ENSMUSG00000086541	Has2os	4.89062	ENSMUSG00000046449	C77370	4.11283
ENSMUSG00000023988	Bysl	2.54811	ENSMUSG00000026502	Desi2	3.56841	ENSMUSG00000026049	Tex30	2.23794	ENSMUSG00000047676	Rpsa-ps10	3.43561	ENSMUSG00000086555	Gm13446	25.8	ENSMUSG00000046470	Sox18	34
ENSMUSG00000024007	Ppil1	3.13973	ENSMUSG00000026547	Tagln2	3.72956	ENSMUSG00000026073	Il1r2	110.541	ENSMUSG00000047730	Fcgbp	11.0402	ENSMUSG00000086825	Gm15675	4.16274	ENSMUSG00000046589	Lrrc8e	3.008
ENSMUSG00000024008	Cpne5	9.12766	ENSMUSG00000026556	Vangl2	2.23972	ENSMUSG00000026094	Stk17b	2.239	ENSMUSG00000048078	Tenm4	6.9112	ENSMUSG00000086962	Gm12248	88.4818	ENSMUSG00000046718	Bst2	5.00125
ENSMUSG00000024056	Ndc80	5.7716	ENSMUSG00000026605	Cenpf	8.09038	ENSMUSG00000026167	Wnt10a	2.55632	ENSMUSG00000048087	Gm4737	3.7439	ENSMUSG00000087002	Gm16277	11.027	ENSMUSG00000046818	Ddit4l	14.7458
ENSMUSG00000024066	Xdh	2.32674	ENSMUSG00000026622	Nek2	9.59231	ENSMUSG00000026196	Bard1	6.12376	ENSMUSG00000048450	Msx1	5.38049	ENSMUSG00000087160	Gm16336	3.35782	ENSMUSG00000047281	Sfn	2.92254
ENSMUSG00000024067	Dpy30	2.22852	ENSMUSG00000026639	Lamb3	2.36949	ENSMUSG00000026202	Tuba4a	3.36198	ENSMUSG00000048616	Nog	7.33871	ENSMUSG00000087261	Gm15477	6.008	ENSMUSG00000047414	Flrt2	2.46054
ENSMUSG00000024158	Hagh	4.33333	ENSMUSG00000026640	Plxna2	4.8851	ENSMUSG00000026220	Slc16a14	2.69716	ENSMUSG00000048758	Rpl29	2.20195	ENSMUSG00000087302	Sox5os1	2.39167	ENSMUSG00000047641	Krt87	104.878
ENSMUSG00000024165	Hn1l	2.10419	ENSMUSG00000026669	Mcm10	7.66929	ENSMUSG00000026259	Ngef	3.30372	ENSMUSG00000049112	Oxtr	14.9364	ENSMUSG00000087470	A630031M04Rik	67.8049	ENSMUSG00000047730	Fcgbp	8.06158
ENSMUSG00000024208	Uqcc2	2.78195	ENSMUSG00000026675	Hsd17b7	2.9	ENSMUSG00000026274	Pask	2.4302	ENSMUSG00000049299	Trappc1	2.18539	ENSMUSG00000087691	Gm15674	3.63514	ENSMUSG00000048078	Tenm4	9.26539
ENSMUSG00000024258	Polr2d	2.22761	ENSMUSG00000026683	Nuf2	9.17931	ENSMUSG00000026278	Bok	4.53061	ENSMUSG00000049420	Tmem200a	4.72727	ENSMUSG00000087698	Gm13031	114.262	ENSMUSG00000048087	Gm4737	4.42276
ENSMUSG00000024268	Celf4	5.66077	ENSMUSG00000026688	Mgst3	4.14542	ENSMUSG00000026341	Actr3	2.5271	ENSMUSG00000049539	Hist1h1a	4.54787	ENSMUSG00000089635	Gm16559	4.50727	ENSMUSG00000048120	Entpd1	3.95141
ENSMUSG00000024270	Slc39a6	3.62851	ENSMUSG00000026779	Mastl	4.91419	ENSMUSG00000026355	Mcm6	2.46783	ENSMUSG00000049760	2410015M20Rik	3.12462	ENSMUSG00000090042	Gm8550	1510	ENSMUSG00000048126	Col6a3	2.51127
ENSMUSG00000024301	Kifc5b	2.39815	ENSMUSG00000026817	Ak1	14.7887	ENSMUSG00000026385	Dbi	2.28539	ENSMUSG00000049866	Arl4c	4.17068	ENSMUSG00000090069	E430024P14Rik	3.56716	ENSMUSG00000048307	Ankrd46	3.77461
ENSMUSG00000024331	Dsc2	16.728	ENSMUSG00000026873	Phf19	3.76316	ENSMUSG00000026413	Pkp1	3.70139	ENSMUSG00000049960	Mrps16	3.0181	ENSMUSG00000090231	Cfb	2.12033	ENSMUSG00000048402	Gli2	2.05559
ENSMUSG00000024378	Stard4	2.70599	ENSMUSG00000026914	Psmd14	2.40467	ENSMUSG00000026415	Fcamr	3.14433	ENSMUSG00000049985	Ankrd55	11	ENSMUSG00000090485	Gm17416	3.07246	ENSMUSG00000048450	Msx1	4.15797
ENSMUSG00000024424	Ttc39c	6.47086	ENSMUSG00000026955	Sapcd2	12.25	ENSMUSG00000026421	Csrp1	2.78189	ENSMUSG00000050069	Grem2	2.35438	ENSMUSG00000090965	Gm17203	2.27869	ENSMUSG00000048616	Nog	4.70968
ENSMUSG00000024436	Mrps18b	2.01477	ENSMUSG00000027018	Hat1	2.29359	ENSMUSG00000026479	Lamc2	3.73109	ENSMUSG00000050108	Bpifc	13.5	ENSMUSG00000094814	Gm21973	5.17647	ENSMUSG00000048677	Tpcn2	2.06198
ENSMUSG00000024590	Lmnb1	2.82696	ENSMUSG00000027173	Depdc7	2.39286	ENSMUSG00000026502	Desi2	5.30962	ENSMUSG00000050272	Dscam	10.6882	ENSMUSG00000095464	Gm21987	2.76389	ENSMUSG00000049001	Ndnf	4.21959
ENSMUSG00000024640	Psat1	5.61656	ENSMUSG00000027203	Dut	3.13462	ENSMUSG00000026547	Tagln2	4.07641	ENSMUSG00000050299	Gm9843	4.68959	ENSMUSG00000097157	Gm26512	2.28302	ENSMUSG00000049112	Oxtr	23.9032
ENSMUSG00000024660	Incenp	3.69516	ENSMUSG00000027224	Duoxa1	2.77163	ENSMUSG00000026605	Cenpf	4.1338	ENSMUSG00000050335	Lgals3	5.05835	ENSMUSG00000097325	Gm16897	2.74055	ENSMUSG00000049122	Frmd3	4.68657
ENSMUSG00000024664	Fads3	12.2865	ENSMUSG00000027306	Nusap1	5.92638	ENSMUSG00000026622	Nek2	7.12308	ENSMUSG00000050359	Sprr1a	24.0256	ENSMUSG00000097564	C430014B12Rik	4.26515	ENSMUSG00000049420	Tmem200a	14.8503
ENSMUSG00000024691	Fam111a	7.6303	ENSMUSG00000027323	Rad51	2.08318	ENSMUSG00000026638	Irf6	2.2362	ENSMUSG00000050377	Il31ra	23.1644	ENSMUSG00000097634	Gm26827	3.07143	ENSMUSG00000049866	Arl4c	5.43257
ENSMUSG00000024726	Carnmt1	2.125	ENSMUSG00000027326	Knl1	8.81797	ENSMUSG00000026639	Lamb3	2.67168	ENSMUSG00000050552	Lamtor4	4.9375	ENSMUSG00000097877	Gm26703	2.40698	ENSMUSG00000049985	Ankrd55	7.15385
ENSMUSG00000024732	Ccdc86	2.65255	ENSMUSG00000027330	Cdc25b	2.84822	ENSMUSG00000026640	Plxna2	3.49525	ENSMUSG00000050621	Rps27rt	8.02023	ENSMUSG00000097928	Gm26578	4.88257	ENSMUSG00000050010	Shisa3	4.12943
ENSMUSG00000024742	Fen1	4.37575	ENSMUSG00000027331	Knstrn	4.60516	ENSMUSG00000026669	Mcm10	7.3622	ENSMUSG00000050635	Sprr2f	39.125	ENSMUSG00000098204	Gm26984	3.30574	ENSMUSG00000050069	Grem2	2.39715
ENSMUSG00000024770	Lipn	6.51429	ENSMUSG00000027358	Bmp2	2.54795	ENSMUSG00000026675	Hsd17b7	2.31687	ENSMUSG00000050856	Atp5k	3.20527	ENSMUSG00000102299	Gm37539	2.00329	ENSMUSG00000050108	Bpifc	20.0909
ENSMUSG00000024772	Ehd1	3.3151	ENSMUSG00000027379	Bub1	11.1917	ENSMUSG00000026683	Nuf2	5.93793	ENSMUSG00000050953	Gja1	2.14446	ENSMUSG00000103195	Gm37644	2.29008	ENSMUSG00000050174	Nudt6	2.27146
ENSMUSG00000024774	Ankrd22	2.27923	ENSMUSG00000027405	Nop56	2.05299	ENSMUSG00000026688	Mgst3	3.28023	ENSMUSG00000051048	P4ha3	7.23047	ENSMUSG00000103434	Gm36993	15.2698	ENSMUSG00000050272	Dscam	13.6661
ENSMUSG00000024791	Cdca5	5.6875	ENSMUSG00000027423	Snx5	2.22729	ENSMUSG00000026767	Fam188a	2.15617	ENSMUSG00000052105	Mtcl1	5.90206	ENSMUSG00000104653	Gm43109	2.51429	ENSMUSG00000050335	Lgals3	3.49886
ENSMUSG00000024795	Kif20b	4.03061	ENSMUSG00000027454	Gins1	3.41667	ENSMUSG00000026779	Mastl	4.31023	ENSMUSG00000052133	Sema5b	2.93143	ENSMUSG00000105212	Gm43557	8.62921	ENSMUSG00000050377	Il31ra	22.6986
ENSMUSG00000024810	Il33	2.31429	ENSMUSG00000027469	Tpx2	8.82783	ENSMUSG00000026817	Ak1	11.1056	ENSMUSG00000052146	Rps10	3.08419	ENSMUSG00000105344	Gm43556	5.86275	ENSMUSG00000050953	Gja1	2.82095
ENSMUSG00000024829	Mrpl21	2.16427	ENSMUSG00000027490	E2f1	3.97619	ENSMUSG00000026827	Gpd2	2.27675	ENSMUSG00000052192	Gm5963	8.75	ENSMUSG00000105356	Gm42603	4.3617	ENSMUSG00000051048	P4ha3	4.55954
ENSMUSG00000024833	Pola2	2.33538	ENSMUSG00000027496	Aurka	9.77551	ENSMUSG00000026873	Phf19	4.98684	ENSMUSG00000052512	Nav2	3.20408	ENSMUSG00000105415	Gm44364	2.43085	ENSMUSG00000051279	Gdf6	3.40146
ENSMUSG00000024841	Eif1ad	2.21316	ENSMUSG00000027533	Fabp5	14.0191	ENSMUSG00000026914	Psmd14	2.36284	ENSMUSG00000052854	Nrk	4.04839	ENSMUSG00000105518	Gm42674	4.68727	ENSMUSG00000051379	Flrt3	2.03583
ENSMUSG00000024844	Banf1	3.05556	ENSMUSG00000027555	Car13	2.9549	ENSMUSG00000026969	Fam166a	2.02525	ENSMUSG00000053317	Sec61b	3.69754	ENSMUSG00000105604	Gm42838	3.6036	ENSMUSG00000052105	Mtcl1	11.4639
ENSMUSG00000024846	Cst6	11.5556	ENSMUSG00000027562	Car2	6.5086	ENSMUSG00000026974	Zmynd19	2.17512	ENSMUSG00000053414	Hunk	5.5533	ENSMUSG00000105873	Gm43708	7.44	ENSMUSG00000052117	D630039A03Rik	10.6538
ENSMUSG00000024899	Papss2	3.70982	ENSMUSG00000027597	Ahcy	2.71672	ENSMUSG00000027018	Hat1	2.59711	ENSMUSG00000053442	4930597O21Rik	2.15102	ENSMUSG00000105899	Gm44383	1990	ENSMUSG00000052133	Sema5b	3.40571
ENSMUSG00000024952	Rps6ka4	3.41324	ENSMUSG00000027613	Eif6	2.72594	ENSMUSG00000027068	Dhrs9	3.10609	ENSMUSG00000053654	Krt42	30.4938	ENSMUSG00000106088	Gm44342	17.4211	ENSMUSG00000052512	Nav2	3.22041
ENSMUSG00000024966	Stip1	2.12843	ENSMUSG00000027635	Dsn1	2.87791	ENSMUSG00000027111	Itga6	2.25056	ENSMUSG00000053656	Dancr	5.36327	ENSMUSG00000106468	AC122844.1	5.05882	ENSMUSG00000052854	Nrk	6.18145
ENSMUSG00000024989	Cep55	10.0164	ENSMUSG00000027636	Sla2	2.76084	ENSMUSG00000027173	Depdc7	2.2967	ENSMUSG00000053746	Ptrh1	3.27586	ENSMUSG00000106837	D630030B08Rik	3.53659	ENSMUSG00000053414	Hunk	9.49746
ENSMUSG00000025001	Hells	5.85079	ENSMUSG00000027637	1110008F13Rik	2.52521	ENSMUSG00000027203	Dut	4.29928	ENSMUSG00000053797	Krt16	19.8458	ENSMUSG00000107041	Gm42735	7.5	ENSMUSG00000053442	4930597O21Rik	3.27959
ENSMUSG00000025027	Xpnpep1	2.78932	ENSMUSG00000027641	Rbl1	3.43363	ENSMUSG00000027224	Duoxa1	2.31847	ENSMUSG00000054555	Adam12	7.78697	ENSMUSG00000107412	Gm20383	4.0463	ENSMUSG00000053746	Ptrh1	2.16379
ENSMUSG00000025037	Maoa	2.75758	ENSMUSG00000027654	Fam83d	9.04348	ENSMUSG00000027306	Nusap1	5.08589	ENSMUSG00000054675	Tmem119	2.37982	ENSMUSG00000107634	Gm43956	5.12308	ENSMUSG00000053797	Krt16	6.96729
ENSMUSG00000025064	Col17a1	2.7711	ENSMUSG00000027699	Ect2	6.06654	ENSMUSG00000027323	Rad51	2.33996	ENSMUSG00000054871	Tmem158	3.2899	ENSMUSG00000108181	C030015A19Rik	3.82238	ENSMUSG00000054453	Sytl5	2.337
ENSMUSG00000025066	Sfr1	2.54307	ENSMUSG00000027714	Exosc9	2.22781	ENSMUSG00000027326	Knl1	6.48848	ENSMUSG00000055022	Cntn1	3.52181	ENSMUSG00000108402	9430064I24Rik	2.38344	ENSMUSG00000054555	Adam12	10.7193
ENSMUSG00000025105	Bnc1	6.3173	ENSMUSG00000027715	Ccna2	7.7228	ENSMUSG00000027330	Cdc25b	2.42171	ENSMUSG00000055093	Gm8430	3.80272	ENSMUSG00000109111	6530437J22Rik	2.12707	ENSMUSG00000054675	Tmem119	2.58491
ENSMUSG00000025134	Alyref	2.23873	ENSMUSG00000027811	4930579G24Rik	3.4322	ENSMUSG00000027331	Knstrn	3.42262	ENSMUSG00000055976	Cldn23	12.913	ENSMUSG00000109501	Gm14377	4.52	ENSMUSG00000054720	Lrrc8c	2.78129
ENSMUSG00000025154	Arhgap19	5.28713	ENSMUSG00000027864	Ptgfrn	2.45241	ENSMUSG00000027342	Pcna	2.31341	ENSMUSG00000056054	S100a8	54.25	ENSMUSG00000111602	RP24-250L13.2	34.087	ENSMUSG00000055022	Cntn1	5.05493
ENSMUSG00000025155	Dus1l	2.16027	ENSMUSG00000027883	Gpsm2	3.12059	ENSMUSG00000027358	Bmp2	4.25342	ENSMUSG00000056091	St3gal5	5.09524	ENSMUSG00000111605	RP24-325N9.4	3.6875	ENSMUSG00000055254	Ntrk2	2.34274
ENSMUSG00000025158	Rfng	3.13514	ENSMUSG00000027932	Slc27a3	3.4584	ENSMUSG00000027377	Mall	2.52525	ENSMUSG00000056313	1810011O10Rik	3.1069	ENSMUSG00000111673	RP23-62D21.4	2.24074	ENSMUSG00000055723	Rras2	2.05213
ENSMUSG00000025161	Slc16a3	16.5784	ENSMUSG00000028003	Lrat	470.944	ENSMUSG00000027379	Bub1	10.7667	ENSMUSG00000056486	Chn1	3.18	ENSMUSG00000111738	RP23-356D13.12	2.59649	ENSMUSG00000055866	Per2	5.42492
ENSMUSG00000025198	Erlin1	2.25529	ENSMUSG00000028039	Efna3	2.73222	ENSMUSG00000027386	Fbln7	2.46108	ENSMUSG00000056487	Mettl7a2	3.58	ENSMUSG00000111796	RP24-294A16.4	29.9592	ENSMUSG00000056091	St3gal5	5.28571
ENSMUSG00000025328	Padi3	59.6818	ENSMUSG00000028044	Cks1b	4.43824	ENSMUSG00000027420	Bfsp1	5.21951	ENSMUSG00000056612	Ppp1r14b	4.32418				ENSMUSG00000056486	Chn1	6.61
ENSMUSG00000025330	Padi4	18.7701	ENSMUSG00000028066	Pmf1	2.80687	ENSMUSG00000027423	Snx5	2.06451	ENSMUSG00000056880	Gadl1	4.66467				ENSMUSG00000056515	Rab31	2.92988
ENSMUSG00000025364	Pa2g4	2.95295	ENSMUSG00000028068	Iqgap3	6.35215	ENSMUSG00000027454	Gins1	5.02083	ENSMUSG00000057036	Gm7536	5.85768				ENSMUSG00000056643	Chst13	1955
ENSMUSG00000025395	Prim1	3.8	ENSMUSG00000028132	Tmem56	2.6234	ENSMUSG00000027469	Tpx2	6.21462	ENSMUSG00000057244	Gm6139	9.24138				ENSMUSG00000057342	Sphk2	2.2708
ENSMUSG00000025403	Shmt2	3.36816	ENSMUSG00000028133	Rwdd3	3.41279	ENSMUSG00000027490	E2f1	5.38095	ENSMUSG00000057322	Rpl38	2.58069				ENSMUSG00000058056	Palld	2.31366
ENSMUSG00000025481	Urah	2.66271	ENSMUSG00000028175	Depdc1a	9.01493	ENSMUSG00000027496	Aurka	8.62245	ENSMUSG00000057605	Gm6807	3.53097				ENSMUSG00000058354	Krt6a	17.2258
ENSMUSG00000025499	Hras	2.99043	ENSMUSG00000028179	Cth	4.46977	ENSMUSG00000027533	Fabp5	9.46873	ENSMUSG00000057657	Rps18-ps3	10.9778				ENSMUSG00000058427	Cxcl2	3.60882
ENSMUSG00000025507	Pidd1	2.05161	ENSMUSG00000028186	Uox	14.381	ENSMUSG00000027555	Car13	2.64605	ENSMUSG00000057666	Gapdh	2.53606				ENSMUSG00000059146	Ntrk3	5.58534
ENSMUSG00000025551	Fgf14	5.57143	ENSMUSG00000028312	Smc2	3.68031	ENSMUSG00000027562	Car2	8.88145	ENSMUSG00000057841	Rpl32	2.74547				ENSMUSG00000059325	Hopx	4.69388
ENSMUSG00000025613	Cct8	2.2662	ENSMUSG00000028330	Ncbp1	2.18037	ENSMUSG00000027597	Ahcy	2.6935	ENSMUSG00000057863	Rpl36	3.29359				ENSMUSG00000059602	Syn3	2.53426
ENSMUSG00000025630	Hprt	3.20033	ENSMUSG00000028367	Txn1	2.80687	ENSMUSG00000027602	Map1lc3a	3.1935	ENSMUSG00000058064	Gm10036	6.48571				ENSMUSG00000059810	Rgs3	4.98574
ENSMUSG00000025650	Col7a1	2.88673	ENSMUSG00000028435	Aqp3	4.14604	ENSMUSG00000027611	Procr	7.28058	ENSMUSG00000058174	Gm5148	4.03889				ENSMUSG00000059824	Dbp	6.49573
ENSMUSG00000025651	Uqcrc1	2.70214	ENSMUSG00000028464	Tpm2	5.52902	ENSMUSG00000027613	Eif6	2.88472	ENSMUSG00000058354	Krt6a	64.3226				ENSMUSG00000059908	Mug1	488.571
ENSMUSG00000025747	Tyms	4.64019	ENSMUSG00000028527	Ak4	5.8189	ENSMUSG00000027635	Dsn1	3.27907	ENSMUSG00000058427	Cxcl2	6.79063				ENSMUSG00000060275	Nrg2	4.58661
ENSMUSG00000025758	Plk4	3.77948	ENSMUSG00000028587	Orc1	3.89565	ENSMUSG00000027636	Sla2	2.92975	ENSMUSG00000058443	Rpl10-ps3	3.22086				ENSMUSG00000060402	Chst8	4.16162
ENSMUSG00000025817	Nudt5	2.0611	ENSMUSG00000028607	Cpt2	2.52353	ENSMUSG00000027637	1110008F13Rik	2.66176	ENSMUSG00000058603	Rpl28-ps1	5.96561				ENSMUSG00000060924	Csmd1	4.43968
ENSMUSG00000025872	Thoc3	2.16476	ENSMUSG00000028613	Lrp8	2.86412	ENSMUSG00000027641	Rbl1	3.38707	ENSMUSG00000059033	Rpl18a-ps1	8.90741				ENSMUSG00000061086	Myl4	4.31765
ENSMUSG00000025903	Lypla1	2.66437	ENSMUSG00000028633	Ctps	3.24242	ENSMUSG00000027654	Fam83d	9.93478	ENSMUSG00000059159	Gm8129	7.91463				ENSMUSG00000061353	Cxcl12	2.43671
ENSMUSG00000025917	Cops5	2.13754	ENSMUSG00000028635	Edn2	2.76842	ENSMUSG00000027699	Ect2	5.56084	ENSMUSG00000059278	Naa38	2.97527				ENSMUSG00000061601	Pclo	7.54248
ENSMUSG00000025937	Lactb2	2.17139	ENSMUSG00000028645	Slc2a1	19.1319	ENSMUSG00000027714	Exosc9	2.06607	ENSMUSG00000059325	Hopx	6.69388				ENSMUSG00000062232	Rapgef2	3.22904
ENSMUSG00000025980	Hspd1	2.85414	ENSMUSG00000028655	Mfsd2a	6.71471	ENSMUSG00000027715	Ccna2	7.0611	ENSMUSG00000059461	Gm7331	5.9375				ENSMUSG00000062515	Fabp4	12.4962
ENSMUSG00000026000	Lancl1	2.81837	ENSMUSG00000028671	Gale	2.18677	ENSMUSG00000027811	4930579G24Rik	5.13559	ENSMUSG00000059518	Znhit1	2.8063				ENSMUSG00000062753	AI413582	2.02848
ENSMUSG00000026039	Sgol2a	5.21612	ENSMUSG00000028678	Kif2c	14.2809	ENSMUSG00000027864	Ptgfrn	2.80785	ENSMUSG00000059534	Uqcr10	6.35319				ENSMUSG00000062960	Kdr	2.7384
ENSMUSG00000026049	Tex30	2.34727	ENSMUSG00000028688	Toe1	2.3685	ENSMUSG00000027883	Gpsm2	2.85	ENSMUSG00000059775	Rps26-ps1	7.20645				ENSMUSG00000062991	Nrg1	15.432
ENSMUSG00000026073	Il1r2	89.6939	ENSMUSG00000028693	Nasp	2.26503	ENSMUSG00000028003	Lrat	849.444	ENSMUSG00000059810	Rgs3	3.45112				ENSMUSG00000063434	Sorcs3	2.48649
ENSMUSG00000026155	Smap1	2.05626	ENSMUSG00000028718	Stil	2.89489	ENSMUSG00000028010	Gar1	2.16319	ENSMUSG00000059908	Mug1	263.81				ENSMUSG00000063458	1700112E06Rik	2.61176
ENSMUSG00000026167	Wnt10a	2.24878	ENSMUSG00000028741	Mrto4	2.45889	ENSMUSG00000028035	Dnajb4	3.08065	ENSMUSG00000060019	Gm10073	11.6309				ENSMUSG00000063713	Klk1b24	6925
ENSMUSG00000026174	Cnot9	2.20839	ENSMUSG00000028766	Alpl	16.3544	ENSMUSG00000028044	Cks1b	4.88235	ENSMUSG00000060032	H2afj	6.56272				ENSMUSG00000063903	Klk1	252.857
ENSMUSG00000026196	Bard1	7.06931	ENSMUSG00000028786	Tmem54	4.32506	ENSMUSG00000028066	Pmf1	2.44206	ENSMUSG00000060143	Gm10076	9.11137				ENSMUSG00000064043	Trerf1	2.44835
ENSMUSG00000026202	Tuba4a	4.29837	ENSMUSG00000028792	Ak2	4.26807	ENSMUSG00000028068	Iqgap3	4.48925	ENSMUSG00000060275	Nrg2	2.26346				ENSMUSG00000064080	Fbln2	9.4335
ENSMUSG00000026220	Slc16a14	3.18299	ENSMUSG00000028832	Stmn1	2.26071	ENSMUSG00000028121	Bcar3	3.77088	ENSMUSG00000060402	Chst8	4.86869				ENSMUSG00000064201	Krt2	94.8418
ENSMUSG00000026229	Psmd1	2.26589	ENSMUSG00000028843	Sh3bgrl3	2.72144	ENSMUSG00000028128	F3	4.08427	ENSMUSG00000060419	Rps16-ps2	4.63034				ENSMUSG00000065954	Tacc1	2.13172
ENSMUSG00000026259	Ngef	2.29752	ENSMUSG00000028862	Map3k6	2.53507	ENSMUSG00000028132	Tmem56	3.26765	ENSMUSG00000060438	Rps10-ps1	10.0385				ENSMUSG00000066516	Klk1b21	462.381
ENSMUSG00000026278	Bok	4.00816	ENSMUSG00000028873	Cdca8	7.13487	ENSMUSG00000028133	Rwdd3	5.26744	ENSMUSG00000060550	H2-Q7	2.33448				ENSMUSG00000066752	Gm10176	8.12
ENSMUSG00000026341	Actr3	2.91893	ENSMUSG00000028884	Rpa2	2.47861	ENSMUSG00000028156	Eif4e	2.32301	ENSMUSG00000060730	Gm10086	10.3				ENSMUSG00000067001	Serpinb7	17.087
ENSMUSG00000026355	Mcm6	2.22753	ENSMUSG00000028896	Rcc1	3.78129	ENSMUSG00000028175	Depdc1a	7.31343	ENSMUSG00000060924	Csmd1	3.24352				ENSMUSG00000067158	Col4a4	6.36489
ENSMUSG00000026377	Nifk	2.00506	ENSMUSG00000028910	Mecr	2.51332	ENSMUSG00000028179	Cth	6.87907	ENSMUSG00000060962	Dmkn	7.06522				ENSMUSG00000067219	Nipal1	4.5
ENSMUSG00000026385	Dbi	2.63711	ENSMUSG00000028953	Abcf2	2.27982	ENSMUSG00000028186	Uox	78.5238	ENSMUSG00000060969	Irx1	3.45263				ENSMUSG00000067613	Krt83	160.476
ENSMUSG00000026413	Pkp1	3.89468	ENSMUSG00000028976	Slc2a5	55.4	ENSMUSG00000028189	Ctbs	2.13292	ENSMUSG00000061086	Myl4	6.27059				ENSMUSG00000067614	Krt86	1590
ENSMUSG00000026415	Fcamr	2.83505	ENSMUSG00000028988	Ctnnbip1	2.35688	ENSMUSG00000028212	Ccne2	2.20976	ENSMUSG00000061330	Gm11361	4.54487				ENSMUSG00000067615	Krt81	1640
ENSMUSG00000026421	Csrp1	2.59635	ENSMUSG00000028995	Fam126a	2.13844	ENSMUSG00000028312	Smc2	3.48171	ENSMUSG00000061353	Cxcl12	2.33605				ENSMUSG00000068122	Agtr2	15.1489
ENSMUSG00000026479	Lamc2	3.59342	ENSMUSG00000029066	Mrpl20	2.44415	ENSMUSG00000028330	Ncbp1	2.02865	ENSMUSG00000061390	Gm7866	11.4571				ENSMUSG00000068758	Il3ra	2.79661
ENSMUSG00000026502	Desi2	5.52306	ENSMUSG00000029093	Sorcs2	3.20419	ENSMUSG00000028367	Txn1	3.44038	ENSMUSG00000061601	Pclo	4.83007				ENSMUSG00000069441	Dsg1a	10.1447
ENSMUSG00000026509	Capn2	2.15364	ENSMUSG00000029147	Ppm1g	2.00716	ENSMUSG00000028378	Ptgr1	2.42857	ENSMUSG00000061615	Hist1h2ab	10.0625				ENSMUSG00000069763	Tmem100	2.21577
ENSMUSG00000026547	Tagln2	4.42796	ENSMUSG00000029177	Cenpa	11.8238	ENSMUSG00000028435	Aqp3	3.70193	ENSMUSG00000061848	Gm5805	5.38095				ENSMUSG00000070866	Zfp804a	2.51495
ENSMUSG00000026603	Smyd2	2.06096	ENSMUSG00000029201	Ugdh	2.17767	ENSMUSG00000028464	Tpm2	4.6062	ENSMUSG00000061928	Dsg1b	4.80342				ENSMUSG00000070867	Trabd2b	11.4734
ENSMUSG00000026605	Cenpf	4.83099	ENSMUSG00000029366	Dck	2.98214	ENSMUSG00000028527	Ak4	3.24409	ENSMUSG00000061983	Rps12	2.81277				ENSMUSG00000071036	Gm10309	3.64407
ENSMUSG00000026622	Nek2	8.11538	ENSMUSG00000029394	Cdk2ap1	2.14715	ENSMUSG00000028587	Orc1	5.4	ENSMUSG00000062328	Rpl17	2.94651				ENSMUSG00000071265	1700086L19Rik	22.2581
ENSMUSG00000026638	Irf6	2.23358	ENSMUSG00000029408	Abcb9	3.75	ENSMUSG00000028633	Ctps	3.71055	ENSMUSG00000062382	Ftl1-ps1	3.93846				ENSMUSG00000071342	Lsmem1	3.45122
ENSMUSG00000026640	Plxna2	3.30507	ENSMUSG00000029413	Naaa	3.87059	ENSMUSG00000028635	Edn2	2.43158	ENSMUSG00000062456	Rpl9-ps6	4.69565				ENSMUSG00000071604	Fam189a2	4.78652
ENSMUSG00000026669	Mcm10	8.30709	ENSMUSG00000029414	Kntc1	4.38479	ENSMUSG00000028645	Slc2a1	16.6305	ENSMUSG00000062461	Gm5453	4.85714				ENSMUSG00000071679	Zcchc16	3.42233
ENSMUSG00000026675	Hsd17b7	4.52289	ENSMUSG00000029430	Ran	3.53035	ENSMUSG00000028655	Mfsd2a	4.42943	ENSMUSG00000062515	Fabp4	11.374				ENSMUSG00000072720	Myo18b	395.082
ENSMUSG00000026683	Nuf2	7.31724	ENSMUSG00000029446	Psph	3.23077	ENSMUSG00000028671	Gale	2.8249	ENSMUSG00000062619	2310039H08Rik	5.33333				ENSMUSG00000073274	Gm14636	10.41
ENSMUSG00000026688	Mgst3	3.59232	ENSMUSG00000029447	Cct6a	2.64409	ENSMUSG00000028678	Kif2c	10.5393	ENSMUSG00000062742	Gm5239	16.2632				ENSMUSG00000073418	C4b	4.8489
ENSMUSG00000026750	Psmb7	2.38671	ENSMUSG00000029482	Aacs	2.40926	ENSMUSG00000028688	Toe1	2.19168	ENSMUSG00000062753	AI413582	2.6962				ENSMUSG00000074182	Znhit6	3.20083
ENSMUSG00000026767	Fam188a	2.07604	ENSMUSG00000029516	Cit	4.67123	ENSMUSG00000028693	Nasp	2.61043	ENSMUSG00000062933	Gm10123	3.78075				ENSMUSG00000074207	Adh1	6.71791
ENSMUSG00000026773	Pfkfb3	3.06115	ENSMUSG00000029521	Chek2	2.47478	ENSMUSG00000028718	Stil	3.67568	ENSMUSG00000062991	Nrg1	11.7774				ENSMUSG00000074305	Peak1	2.50676
ENSMUSG00000026779	Mastl	5.21122	ENSMUSG00000029554	Mad1l1	2.70242	ENSMUSG00000028741	Mrto4	2.28249	ENSMUSG00000063130	Calml3	8.7234				ENSMUSG00000074345	Tnfaip8l3	6.26559
ENSMUSG00000026817	Ak1	12.1268	ENSMUSG00000029570	Lfng	2.51928	ENSMUSG00000028766	Alpl	35.1266	ENSMUSG00000063177	Klk1b27	1120				ENSMUSG00000074505	Fat3	3.21622
ENSMUSG00000026827	Gpd2	2.64406	ENSMUSG00000029580	Actb	2.13811	ENSMUSG00000028776	Tinagl1	2.63807	ENSMUSG00000063434	Sorcs3	3.6036				ENSMUSG00000074813	Gm14005	3.1791
ENSMUSG00000026873	Phf19	3.44737	ENSMUSG00000029581	Fscn1	14.6382	ENSMUSG00000028786	Tmem54	2.86849	ENSMUSG00000063457	Rps15	2.89273				ENSMUSG00000074971	Fibin	2.93201
ENSMUSG00000026914	Psmd14	3.09339	ENSMUSG00000029591	Ung	4.14118	ENSMUSG00000028789	Azin2	2.15659	ENSMUSG00000063458	1700112E06Rik	3.71765				ENSMUSG00000075707	Dio3	7.13433
ENSMUSG00000026969	Fam166a	2.08891	ENSMUSG00000029727	Cyp3a13	9.65625	ENSMUSG00000028792	Ak2	5.54235	ENSMUSG00000063623	C230062I16Rik	3.74324				ENSMUSG00000076240	Mir702	2.06849
ENSMUSG00000026999	Nup35	2.1466	ENSMUSG00000029730	Mcm7	2.45067	ENSMUSG00000028843	Sh3bgrl3	3.06799	ENSMUSG00000063696	Gm8730	2.56743				ENSMUSG00000076436	Oxct2a	9.04059
ENSMUSG00000027018	Hat1	2.74706	ENSMUSG00000029752	Asns	2.92557	ENSMUSG00000028849	Map7d1	3.14475	ENSMUSG00000063713	Klk1b24	7060				ENSMUSG00000078117	Gm16485	6.75749
ENSMUSG00000027068	Dhrs9	4.82172	ENSMUSG00000029761	Cald1	7.96522	ENSMUSG00000028862	Map3k6	2.48697	ENSMUSG00000063787	Chchd1	2.66031				ENSMUSG00000078144	Capns2	5.23729
ENSMUSG00000027099	Mtx2	2.35409	ENSMUSG00000029772	Ahcyl2	3.87953	ENSMUSG00000028873	Cdca8	5.94079	ENSMUSG00000063856	Gpx1	2.84175				ENSMUSG00000079138	Gm8818	4.55462
ENSMUSG00000027108	Ola1	2.30587	ENSMUSG00000029777	Gars	2.43304	ENSMUSG00000028884	Rpa2	2.72193	ENSMUSG00000063875	Rps6-ps1	6.54595				ENSMUSG00000079465	Col4a3	8.36246
ENSMUSG00000027111	Itga6	2.64327	ENSMUSG00000029910	Mad2l1	6.06545	ENSMUSG00000028893	Sesn2	2.79788	ENSMUSG00000063885	Gm6498	3.91667				ENSMUSG00000079564	Gm11149	2.1875
ENSMUSG00000027173	Depdc7	2.24451	ENSMUSG00000029919	Hpgds	4.79554	ENSMUSG00000028896	Rcc1	3.11279	ENSMUSG00000063903	Klk1	155.714				ENSMUSG00000081223	Gm12247	4.78652
ENSMUSG00000027203	Dut	4.35697	ENSMUSG00000030088	Aldh1l1	3.18033	ENSMUSG00000028910	Mecr	2.04973	ENSMUSG00000064080	Fbln2	8.00475				ENSMUSG00000082071	Pramel	4695
ENSMUSG00000027204	Fbn1	2.08424	ENSMUSG00000030095	Tmem43	2.42692	ENSMUSG00000028927	Padi2	4.15491	ENSMUSG00000064201	Krt2	96.1314				ENSMUSG00000083382	Gm6433	7.18182
ENSMUSG00000027224	Duoxa1	2.64496	ENSMUSG00000030137	Tuba8	3.52991	ENSMUSG00000028933	Xrcc2	2.01402	ENSMUSG00000064232	Gm5414	10.4697				ENSMUSG00000085058	8030453O22Rik	3.84906
ENSMUSG00000027245	Hypk	2.05509	ENSMUSG00000030214	Plbd1	9.26244	ENSMUSG00000028953	Abcf2	2.07007	ENSMUSG00000064281	Rpl19-ps1	5.17822				ENSMUSG00000085080	2310044K18Rik	2.55263
ENSMUSG00000027306	Nusap1	5.61656	ENSMUSG00000030224	Strap	2.00574	ENSMUSG00000028955	Vamp3	2.38801	ENSMUSG00000064337	mt-Rnr1	3.51008				ENSMUSG00000085083	Gm11615	5.57778
ENSMUSG00000027323	Rad51	2.43761	ENSMUSG00000030254	Rad18	3.38428	ENSMUSG00000028976	Slc2a5	52.44	ENSMUSG00000064339	mt-Rnr2	2.90443				ENSMUSG00000085314	Gm14866	11.0185
ENSMUSG00000027326	Knl1	8.11751	ENSMUSG00000030256	Bhlhe41	3.69242	ENSMUSG00000029066	Mrpl20	2.68351	ENSMUSG00000064347	mt-Ta	5.46729				ENSMUSG00000085363	Gm15478	6.98734
ENSMUSG00000027330	Cdc25b	2.15274	ENSMUSG00000030265	Kras	2.9864	ENSMUSG00000029093	Sorcs2	2.48233	ENSMUSG00000064348	mt-Tn	5.43689				ENSMUSG00000085505	Gm12868	2.64356
ENSMUSG00000027331	Knstrn	3.50595	ENSMUSG00000030268	Bcat1	22.1827	ENSMUSG00000029147	Ppm1g	2.16182	ENSMUSG00000064354	mt-Co2	3.49057				ENSMUSG00000085560	C230038L03Rik	7.67347
ENSMUSG00000027342	Pcna	2.4302	ENSMUSG00000030276	Ttll3	2.12703	ENSMUSG00000029177	Cenpa	7.7	ENSMUSG00000064357	mt-Atp6	4.21739				ENSMUSG00000085941	Gm11201	3.17832
ENSMUSG00000027347	Rasgrp1	4.14545	ENSMUSG00000030298	Sec13	2.32387	ENSMUSG00000029201	Ugdh	2.04186	ENSMUSG00000064358	mt-Co3	4.5625				ENSMUSG00000086043	Gm12473	3.128
ENSMUSG00000027377	Mall	2.7803	ENSMUSG00000030346	Rad51ap1	3.89362	ENSMUSG00000029283	Cdc7	3.0625	ENSMUSG00000064380	Gm26448	7.51765				ENSMUSG00000086083	Gm15829	2.5375
ENSMUSG00000027379	Bub1	12.1083	ENSMUSG00000030352	Tspan9	3.16716	ENSMUSG00000029366	Dck	3.27902	ENSMUSG00000064382	Gm26447	4.89513				ENSMUSG00000086356	Gm13441	2.30316
ENSMUSG00000027386	Fbln7	2.7994	ENSMUSG00000030353	Tead4	2.87423	ENSMUSG00000029377	Ereg	12.0455	ENSMUSG00000064387	Snora73a	10.0508				ENSMUSG00000086373	Gm11978	39.0659
ENSMUSG00000027405	Nop56	2.04302	ENSMUSG00000030403	Vasp	2.40072	ENSMUSG00000029378	Areg	11.8557	ENSMUSG00000064397	Gm23624	16.8182				ENSMUSG00000086399	Gm16144	4.32143
ENSMUSG00000027420	Bfsp1	5.80488	ENSMUSG00000030513	Pcsk6	2.50664	ENSMUSG00000029408	Abcb9	4.27586	ENSMUSG00000064405	Gm23925	12.4407				ENSMUSG00000086541	Has2os	3.79427
ENSMUSG00000027423	Snx5	2.52432	ENSMUSG00000030528	Blm	2.5567	ENSMUSG00000029413	Naaa	5.22059	ENSMUSG00000064451	Snora23	13.2549				ENSMUSG00000086544	Chn1os3	5.97297
ENSMUSG00000027454	Gins1	5.25	ENSMUSG00000030559	Rab38	2.81738	ENSMUSG00000029414	Kntc1	3.58613	ENSMUSG00000064453	Snord21	3.13415				ENSMUSG00000086555	Gm13446	32.4
ENSMUSG00000027469	Tpx2	7.45991	ENSMUSG00000030592	Ryr1	2.96296	ENSMUSG00000029430	Ran	3.26334	ENSMUSG00000064513	Snora9	5.46377				ENSMUSG00000086962	Gm12248	84.1168
ENSMUSG00000027490	E2f1	3.8254	ENSMUSG00000030603	Psmc4	2.35689	ENSMUSG00000029446	Psph	3.39085	ENSMUSG00000064558	Gm24620	10.5102				ENSMUSG00000087002	Gm16277	23.8041
ENSMUSG00000027496	Aurka	10.0306	ENSMUSG00000030623	Prss23os	3.2753	ENSMUSG00000029447	Cct6a	2.20141	ENSMUSG00000064563	Snora7a	4.7561				ENSMUSG00000087047	1700110K17Rik	18.6818
ENSMUSG00000027533	Fabp5	12.0368	ENSMUSG00000030641	Ddias	4.30481	ENSMUSG00000029516	Cit	3.28995	ENSMUSG00000064602	Snora41	4.2037				ENSMUSG00000087261	Gm15477	4.392
ENSMUSG00000027555	Car13	3.38469	ENSMUSG00000030649	Anapc15	2.55892	ENSMUSG00000029554	Mad1l1	2.05363	ENSMUSG00000064604	Snora44	5.46821				ENSMUSG00000087302	Sox5os1	4.14167
ENSMUSG00000027562	Car2	16.4321	ENSMUSG00000030657	Xylt1	2.36129	ENSMUSG00000029563	Foxp2	3.04412	ENSMUSG00000064634	Gm22620	9.92593				ENSMUSG00000087314	Prkag2os2	2.87603
ENSMUSG00000027597	Ahcy	2.94737	ENSMUSG00000030677	Kif22	7.43005	ENSMUSG00000029570	Lfng	2.57841	ENSMUSG00000064655	Gm25788	8.26559				ENSMUSG00000087470	A630031M04Rik	71.9512
ENSMUSG00000027602	Map1lc3a	3.24782	ENSMUSG00000030748	Il4ra	5.42174	ENSMUSG00000029580	Actb	2.08099	ENSMUSG00000064666	Snora52	4.17391				ENSMUSG00000087698	Gm13031	110.656
ENSMUSG00000027611	Procr	2.81295	ENSMUSG00000030790	Adm	8.30526	ENSMUSG00000029581	Fscn1	21.1839	ENSMUSG00000064682	Gm25813	13.5542				ENSMUSG00000089635	Gm16559	7.10964
ENSMUSG00000027613	Eif6	2.9516	ENSMUSG00000030793	Pycard	3.25302	ENSMUSG00000029591	Ung	5.09412	ENSMUSG00000064694	Gm24146	13.2333				ENSMUSG00000089940	Gm4117	2.75
ENSMUSG00000027635	Dsn1	3.30814	ENSMUSG00000030844	Rgs10	4.88235	ENSMUSG00000029727	Cyp3a13	12.5	ENSMUSG00000064724	Gm25852	17.6429				ENSMUSG00000090069	E430024P14Rik	3.40299
ENSMUSG00000027636	Sla2	3.12706	ENSMUSG00000030867	Plk1	3.3246	ENSMUSG00000029730	Mcm7	2.38251	ENSMUSG00000064751	Gm26330	3.6117				ENSMUSG00000090291	Lrrc10b	27.7333
ENSMUSG00000027637	1110008F13Rik	2.91702	ENSMUSG00000030978	Rrm1	3.05648	ENSMUSG00000029752	Asns	2.44658	ENSMUSG00000064798	n-R5s193	66.4681				ENSMUSG00000090485	Gm17416	4.98551
ENSMUSG00000027641	Rbl1	3.959	ENSMUSG00000031004	Mki67	7.58727	ENSMUSG00000029761	Cald1	5.44493	ENSMUSG00000064853	Gm23442	5.26779				ENSMUSG00000090965	Gm17203	3.12295
ENSMUSG00000027649	Ctnnbl1	2.26295	ENSMUSG00000031097	Tnni2	4.88333	ENSMUSG00000029772	Ahcyl2	2.25203	ENSMUSG00000064899	Snord118	6.95333				ENSMUSG00000091423	Gm17509	5.8359
ENSMUSG00000027654	Fam83d	7.16304	ENSMUSG00000031146	Plp2	2.78101	ENSMUSG00000029777	Gars	2.6092	ENSMUSG00000064901	Snora21	7.25882				ENSMUSG00000092071	A230065N10Rik	2.52332
ENSMUSG00000027695	Pld1	2.18182	ENSMUSG00000031149	Praf2	2.94904	ENSMUSG00000029910	Mad2l1	5.17016	ENSMUSG00000064941	Gm23238	50.2439				ENSMUSG00000094814	Gm21973	9.21008
ENSMUSG00000027699	Ect2	6.20342	ENSMUSG00000031207	Msn	3.93562	ENSMUSG00000029919	Hpgds	4.47212	ENSMUSG00000064945	Rny3	11.976				ENSMUSG00000094910	D430019H16Rik	3.04639
ENSMUSG00000027714	Exosc9	2.50789	ENSMUSG00000031217	Efnb1	2.89662	ENSMUSG00000029924	Slc37a3	2.10845	ENSMUSG00000064966	Snord15b	3.95644				ENSMUSG00000095464	Gm21987	2.4537
ENSMUSG00000027715	Ccna2	8.61401	ENSMUSG00000031239	Itm2a	3.28283	ENSMUSG00000030095	Tmem43	2.37264	ENSMUSG00000064981	Snora70	6.77157				ENSMUSG00000097111	Peak1os	2.10256
ENSMUSG00000027787	Nmd3	2.07471	ENSMUSG00000031262	Cenpi	4.46842	ENSMUSG00000030137	Tuba8	15.3761	ENSMUSG00000064994	Gm22422	7.72				ENSMUSG00000097157	Gm26512	3.08019
ENSMUSG00000027811	4930579G24Rik	4.68644	ENSMUSG00000031328	Flna	2.68976	ENSMUSG00000030208	Emp1	2.20528	ENSMUSG00000064999	Gm26035	17.3208				ENSMUSG00000097325	Gm16897	2.45438
ENSMUSG00000027864	Ptgfrn	2.81822	ENSMUSG00000031349	Nsdhl	2.18074	ENSMUSG00000030214	Plbd1	6.31222	ENSMUSG00000065016	Snora3	7.5				ENSMUSG00000097564	C430014B12Rik	7.31818
ENSMUSG00000027883	Gpsm2	2.92868	ENSMUSG00000031400	G6pdx	2.64406	ENSMUSG00000030224	Strap	2.18983	ENSMUSG00000065036	Gm22362	3.47692				ENSMUSG00000097634	Gm26827	3.98214
ENSMUSG00000027932	Slc27a3	2.59423	ENSMUSG00000031402	Mpp1	2.3017	ENSMUSG00000030254	Rad18	3.99345	ENSMUSG00000065037	Rn7sk	5.61963				ENSMUSG00000097831	4930540M05Rik	4.4
ENSMUSG00000027956	Tmem144	2.3617	ENSMUSG00000031403	Dkc1	2.29719	ENSMUSG00000030256	Bhlhe41	7.43491	ENSMUSG00000065041	Gm24044	10.7735				ENSMUSG00000097928	Gm26578	7.75413
ENSMUSG00000028003	Lrat	1236.39	ENSMUSG00000031490	Eif4ebp1	2.2345	ENSMUSG00000030265	Kras	3.02417	ENSMUSG00000065087	Snord22	8.16915				ENSMUSG00000097976	Gm26918	6.63462
ENSMUSG00000028044	Cks1b	6.16765	ENSMUSG00000031517	Gpm6a	8.02778	ENSMUSG00000030268	Bcat1	35.3808	ENSMUSG00000065089	Gm26493	15.9545				ENSMUSG00000098204	Gm26984	2.37078
ENSMUSG00000028066	Pmf1	2.91416	ENSMUSG00000031578	Mak16	2.01766	ENSMUSG00000030306	Tmtc1	3.3918	ENSMUSG00000065097	Snora16a	4.51832				ENSMUSG00000098457	Mir8097	3.74459
ENSMUSG00000028068	Iqgap3	4.28763	ENSMUSG00000031604	Msmo1	2.86028	ENSMUSG00000030346	Rad51ap1	5.06383	ENSMUSG00000065105	Gm26130	6.47458				ENSMUSG00000098465	Mir1668	14.8696
ENSMUSG00000028121	Bcar3	3.79657	ENSMUSG00000031669	Gins3	3.83146	ENSMUSG00000030352	Tspan9	2.49034	ENSMUSG00000065145	Vaultrc5	28.3032				ENSMUSG00000102299	Gm37539	2.20395
ENSMUSG00000028128	F3	4.03089	ENSMUSG00000031700	Gpt2	2.3297	ENSMUSG00000030353	Tead4	2.93252	ENSMUSG00000065176	Rnu12	10.3188				ENSMUSG00000102919	Gm37726	3.14925
ENSMUSG00000028132	Tmem56	3.63887	ENSMUSG00000031756	Cenpn	5.29167	ENSMUSG00000030403	Vasp	2.46168	ENSMUSG00000065208	Gm24616	6.51031				ENSMUSG00000103434	Gm36993	23.4048
ENSMUSG00000028133	Rwdd3	6.03779	ENSMUSG00000031757	Mt4	12.2778	ENSMUSG00000030512	Snrpa1	2.47821	ENSMUSG00000065226	Gm25791	4.49839				ENSMUSG00000103622	Gm38391	2.58983
ENSMUSG00000028156	Eif4e	2.77699	ENSMUSG00000031799	Tpm4	2.1719	ENSMUSG00000030513	Pcsk6	5.07086	ENSMUSG00000065232	Gm22973	7.64122				ENSMUSG00000104653	Gm43109	6.1551
ENSMUSG00000028175	Depdc1a	8.64179	ENSMUSG00000031824	6430548M08Rik	3.54545	ENSMUSG00000030528	Blm	2.61082	ENSMUSG00000065254	Gm23973	12.4737				ENSMUSG00000105212	Gm43557	8.25843
ENSMUSG00000028179	Cth	5.95814	ENSMUSG00000031827	Cotl1	13.4196	ENSMUSG00000030559	Rab38	2.84752	ENSMUSG00000065304	Gm23245	6.78				ENSMUSG00000105344	Gm43556	5.94118
ENSMUSG00000028186	Uox	173.905	ENSMUSG00000031838	Ifi30	2.27561	ENSMUSG00000030591	Psmd8	2.23016	ENSMUSG00000065327	Gm22058	17.1667				ENSMUSG00000105518	Gm42674	4.24345
ENSMUSG00000028187	Rpf1	2.50823	ENSMUSG00000031848	Lsm4	2.117	ENSMUSG00000030623	Prss23os	8.52632	ENSMUSG00000065336	Snora34	13.3409				ENSMUSG00000105604	Gm42838	4.08108
ENSMUSG00000028189	Ctbs	2.5317	ENSMUSG00000031870	Pgr	33.5349	ENSMUSG00000030641	Ddias	4.5615	ENSMUSG00000065353	Snora73b	9.56405				ENSMUSG00000105771	2900064K03Rik	3.25472
ENSMUSG00000028212	Ccne2	3.10894	ENSMUSG00000031877	Ces2g	2.34789	ENSMUSG00000030643	Rab30	2.18451	ENSMUSG00000065637	Gm26397	6.62727				ENSMUSG00000105873	Gm43708	7.88
ENSMUSG00000028251	Tstd3	3.86792	ENSMUSG00000031910	Has3	2.36247	ENSMUSG00000030649	Anapc15	2.50168	ENSMUSG00000065649	Snora74a	8.48649				ENSMUSG00000105983	Gm42770	4.06452
ENSMUSG00000028261	Ndufaf4	2.27189	ENSMUSG00000031939	Taf1d	2.76485	ENSMUSG00000030677	Kif22	5.21244	ENSMUSG00000065653	Gm23105	5.00917				ENSMUSG00000106088	Gm44342	20.5789
ENSMUSG00000028312	Smc2	4.01916	ENSMUSG00000031960	Aars	2.47411	ENSMUSG00000030748	Il4ra	5.19179	ENSMUSG00000065686	Snora5c	4.89474				ENSMUSG00000106379	Lhfpl3	3.25758
ENSMUSG00000028330	Ncbp1	2.45843	ENSMUSG00000031971	Ccsap	2.05505	ENSMUSG00000030790	Adm	25.1158	ENSMUSG00000065687	Gm23734	5.78161				ENSMUSG00000106407	Gm43439	2.21404
ENSMUSG00000028333	Anp32b	2.29211	ENSMUSG00000032012	Nectin1	2.16826	ENSMUSG00000030793	Pycard	2.40604	ENSMUSG00000065701	Rny1	8.84314				ENSMUSG00000106468	AC122844.1	2.42857
ENSMUSG00000028367	Txn1	4.01209	ENSMUSG00000032026	Rexo2	2.21978	ENSMUSG00000030844	Rgs10	11.2	ENSMUSG00000065721	Gm26168	13.9651				ENSMUSG00000106568	Gm42814	4.69634
ENSMUSG00000028426	Rad23b	2.12263	ENSMUSG00000032113	Chek1	2.59223	ENSMUSG00000030854	Ptpn5	15.0714	ENSMUSG00000065725	Gm26165	4.47744				ENSMUSG00000107041	Gm42735	8.94118
ENSMUSG00000028435	Aqp3	4.64454	ENSMUSG00000032193	Ldlr	2.18645	ENSMUSG00000030867	Plk1	2.57056	ENSMUSG00000065778	Gm22154	7.21124				ENSMUSG00000107205	Gm42576	2.375
ENSMUSG00000028455	Stoml2	2.22452	ENSMUSG00000032218	Ccnb2	13.7939	ENSMUSG00000030878	Cdr2	2.54362	ENSMUSG00000065808	Gm23037	11.3793				ENSMUSG00000107350	Gm42532	13.0435
ENSMUSG00000028464	Tpm2	6.24208	ENSMUSG00000032224	Fam81a	15.1667	ENSMUSG00000030978	Rrm1	3.25282	ENSMUSG00000065818	Snord35a	4.84906				ENSMUSG00000107412	Gm20383	6.05556
ENSMUSG00000028527	Ak4	6.14173	ENSMUSG00000032254	Kif23	5.90909	ENSMUSG00000031004	Mki67	4.47481	ENSMUSG00000065820	Gm26316	16.2941				ENSMUSG00000108181	C030015A19Rik	2.78102
ENSMUSG00000028560	Usp1	2.29184	ENSMUSG00000032281	Acsbg1	4.07263	ENSMUSG00000031016	Wee1	2.29704	ENSMUSG00000065824	Gm26315	12.4211				ENSMUSG00000108478	Gm19514	33.1111
ENSMUSG00000028587	Orc1	5.34783	ENSMUSG00000032294	Pkm	3.18963	ENSMUSG00000031097	Tnni2	4.3	ENSMUSG00000065887	n-R5s185	5.33929				ENSMUSG00000109625	3110080E11Rik	10.2857
ENSMUSG00000028607	Cpt2	2.50882	ENSMUSG00000032313	Tmem266	5.26861	ENSMUSG00000031119	Gpc4	2.12746	ENSMUSG00000065899	Gm24523	5.375				ENSMUSG00000110874	RP24-295B16.1	5.85714
ENSMUSG00000028609	Magoh	2.4856	ENSMUSG00000032332	Col12a1	2.0986	ENSMUSG00000031146	Plp2	2.61641	ENSMUSG00000065911	Gm24447	12.8657				ENSMUSG00000111602	RP24-250L13.2	22.2174
ENSMUSG00000028613	Lrp8	2.76433	ENSMUSG00000032358	Fam83b	2.15843	ENSMUSG00000031207	Msn	3.44829	ENSMUSG00000065922	n-R5-8s1	16.119				ENSMUSG00000111738	RP23-356D13.12	2.92105
ENSMUSG00000028614	Ndc1	2.05259	ENSMUSG00000032397	Tipin	2.43921	ENSMUSG00000031217	Efnb1	2.58597	ENSMUSG00000065952	C330021F23Rik	5.88571				ENSMUSG00000111796	RP24-294A16.4	42.4044
ENSMUSG00000028633	Ctps	3.90387	ENSMUSG00000032400	Zwilch	5.42063	ENSMUSG00000031226	Pbdc1	2.17998	ENSMUSG00000066068	Gm13611	9
ENSMUSG00000028645	Slc2a1	17.9192	ENSMUSG00000032412	Atp1b3	2.50185	ENSMUSG00000031262	Cenpi	3.7	ENSMUSG00000066315	Gm12918	3.44944
ENSMUSG00000028655	Mfsd2a	4.76276	ENSMUSG00000032452	Clstn2	4.45541	ENSMUSG00000031372	Trex2	8.54167	ENSMUSG00000066407	Gm10263	3.53478
ENSMUSG00000028671	Gale	2.94553	ENSMUSG00000032454	Rbp2	34.8889	ENSMUSG00000031381	Piga	2.03392	ENSMUSG00000066516	Klk1b21	545.238
ENSMUSG00000028678	Kif2c	11.4045	ENSMUSG00000032456	Nmnat3	2.46821	ENSMUSG00000031383	Dusp9	4.7907	ENSMUSG00000066724	Gm10175	9.9
ENSMUSG00000028683	Eif2b3	2.08831	ENSMUSG00000032479	Map4	2.38307	ENSMUSG00000031400	G6pdx	3.22045	ENSMUSG00000066809	Gm10180	15.5811
ENSMUSG00000028688	Toe1	2.2734	ENSMUSG00000032487	Ptgs2	4.26835	ENSMUSG00000031402	Mpp1	2.17547	ENSMUSG00000066902	Rps23-ps2	5.88571
ENSMUSG00000028693	Nasp	2.83715	ENSMUSG00000032586	Traip	5.55725	ENSMUSG00000031403	Dkc1	2.16505	ENSMUSG00000067001	Serpinb7	10.8261
ENSMUSG00000028718	Stil	3.30931	ENSMUSG00000032643	Fhl3	5.65926	ENSMUSG00000031422	Morf4l2	2.20294	ENSMUSG00000067058	Rps15a-ps5	8.95652
ENSMUSG00000028741	Mrto4	2.68435	ENSMUSG00000032735	Ablim3	3.96466	ENSMUSG00000031490	Eif4ebp1	2.4717	ENSMUSG00000067158	Col4a4	3.92484
ENSMUSG00000028766	Alpl	58.7089	ENSMUSG00000032740	Ccdc88a	3.79668	ENSMUSG00000031504	Rab20	2.40417	ENSMUSG00000067219	Nipal1	9.54839
ENSMUSG00000028776	Tinagl1	3.14336	ENSMUSG00000032783	Troap	6.5	ENSMUSG00000031604	Msmo1	2.16357	ENSMUSG00000067235	H2-Q10	2.42336
ENSMUSG00000028786	Tmem54	3.07692	ENSMUSG00000032796	Lama1	2.22727	ENSMUSG00000031647	Mfap3l	2.28957	ENSMUSG00000067344	Rps25-ps1	5.125
ENSMUSG00000028792	Ak2	5.88267	ENSMUSG00000032815	Fanca	2.34911	ENSMUSG00000031669	Gins3	3.89888	ENSMUSG00000067455	Hist1h4j	9.94643
ENSMUSG00000028832	Stmn1	2.04167	ENSMUSG00000032860	P2ry2	3.81356	ENSMUSG00000031683	Lsm6	2.1411	ENSMUSG00000067575	Rpl35a-ps3	6.59524
ENSMUSG00000028837	Psmb2	2.16965	ENSMUSG00000032902	Slc16a1	6.4965	ENSMUSG00000031700	Gpt2	2.72343	ENSMUSG00000067613	Krt83	112.381
ENSMUSG00000028843	Sh3bgrl3	3.45231	ENSMUSG00000032911	Cspg4	4.77823	ENSMUSG00000031756	Cenpn	4.52778	ENSMUSG00000067615	Krt81	1180
ENSMUSG00000028849	Map7d1	2.87404	ENSMUSG00000032939	Nup93	2.8716	ENSMUSG00000031799	Tpm4	2.07237	ENSMUSG00000067719	Gm10221	12.7
ENSMUSG00000028862	Map3k6	2.29259	ENSMUSG00000033031	C330027C09Rik	5.42656	ENSMUSG00000031824	6430548M08Rik	4.36364	ENSMUSG00000067847	Romo1	3.47922
ENSMUSG00000028873	Cdca8	6.70066	ENSMUSG00000033032	Afap1l1	2.54294	ENSMUSG00000031827	Cotl1	13.5232	ENSMUSG00000067870	Rpl31-ps8	4.5875
ENSMUSG00000028884	Rpa2	2.74866	ENSMUSG00000033033	Calhm2	2.30058	ENSMUSG00000031848	Lsm4	2.0702	ENSMUSG00000068122	Agtr2	12.8617
ENSMUSG00000028896	Rcc1	3.70564	ENSMUSG00000033268	Duox1	3.20971	ENSMUSG00000031870	Pgr	40.3699	ENSMUSG00000068220	Lgals1	3.43813
ENSMUSG00000028899	Taf12	2.17135	ENSMUSG00000033307	Mif	3.28036	ENSMUSG00000031936	Hephl1	32.4	ENSMUSG00000068240	Gm11808	5.51389
ENSMUSG00000028927	Padi2	3.38728	ENSMUSG00000033498	Strc	2.14943	ENSMUSG00000031960	Aars	2.4647	ENSMUSG00000068262	Gm5879	5.44898
ENSMUSG00000028932	Psmc2	2.12267	ENSMUSG00000033762	Recql4	3.21739	ENSMUSG00000032012	Nectin1	2.05832	ENSMUSG00000068323	Slc4a5	6.58065
ENSMUSG00000028953	Abcf2	2.21375	ENSMUSG00000033765	Calm4	4.31061	ENSMUSG00000032092	Mpzl2	2.60095	ENSMUSG00000068396	Rpl34-ps1	4.47101
ENSMUSG00000028955	Vamp3	2.66552	ENSMUSG00000033809	Alg3	2.14524	ENSMUSG00000032113	Chek1	3.2945	ENSMUSG00000068758	Il3ra	5.64407
ENSMUSG00000028961	Pgd	2.27765	ENSMUSG00000033952	Aspm	8.22718	ENSMUSG00000032218	Ccnb2	9.30303	ENSMUSG00000069267	Hist1h3b	9.27143
ENSMUSG00000028976	Slc2a5	54.12	ENSMUSG00000033955	Tnks1bp1	2.12312	ENSMUSG00000032224	Fam81a	11.4242	ENSMUSG00000069270	Hist1h2ac	7.27273
ENSMUSG00000028988	Ctnnbip1	2.2663	ENSMUSG00000034009	Rxfp1	5.23556	ENSMUSG00000032254	Kif23	3.94168	ENSMUSG00000069272	Hist1h2ae	9.46774
ENSMUSG00000028995	Fam126a	2.21824	ENSMUSG00000034023	Fancd2	3.23228	ENSMUSG00000032261	Sh3bgrl2	2.02737	ENSMUSG00000069274	Hist1h4f	11.1949
ENSMUSG00000029014	Dnajc2	2.2427	ENSMUSG00000034112	Atp2c2	6.76866	ENSMUSG00000032281	Acsbg1	4.59777	ENSMUSG00000069300	Hist1h2bj	7.75221
ENSMUSG00000029038	Ssu72	2.16255	ENSMUSG00000034117	Ptgdr2	2.53933	ENSMUSG00000032294	Pkm	2.68455	ENSMUSG00000069301	Hist1h2ag	7.78125
ENSMUSG00000029066	Mrpl20	3.31915	ENSMUSG00000034203	Chchd4	2.21684	ENSMUSG00000032313	Tmem266	2.99353	ENSMUSG00000069303	Hist1h2br	18.55
ENSMUSG00000029093	Sorcs2	2.2788	ENSMUSG00000034206	Polq	2.91176	ENSMUSG00000032318	Isl2	4.03896	ENSMUSG00000069441	Dsg1a	7.03947
ENSMUSG00000029147	Ppm1g	2.14834	ENSMUSG00000034311	Kif4	6.75278	ENSMUSG00000032397	Tipin	2.7531	ENSMUSG00000069682	Gm10275	4.44275
ENSMUSG00000029177	Cenpa	9.23333	ENSMUSG00000034317	Trim59	3.2847	ENSMUSG00000032400	Zwilch	4.88889	ENSMUSG00000069862	Rps12-ps9	9.53659
ENSMUSG00000029201	Ugdh	2.12837	ENSMUSG00000034329	Brip1	3.9258	ENSMUSG00000032412	Atp1b3	2.38566	ENSMUSG00000069972	Rps13-ps2	4.63927
ENSMUSG00000029283	Cdc7	3.1	ENSMUSG00000034349	Smc4	2.47444	ENSMUSG00000032454	Rbp2	32.3889	ENSMUSG00000070063	Snora33	4.02727
ENSMUSG00000029334	Prkg2	9.96296	ENSMUSG00000034362	Csta1	14.0348	ENSMUSG00000032456	Nmnat3	2.21821	ENSMUSG00000070167	Snora57	8.61321
ENSMUSG00000029363	Rfc5	2.05492	ENSMUSG00000034371	Tkfc	2.18182	ENSMUSG00000032479	Map4	2.54667	ENSMUSG00000070225	n-R5s33	29.5
ENSMUSG00000029366	Dck	3.56027	ENSMUSG00000034424	Gcsh	2.49378	ENSMUSG00000032487	Ptgs2	19.039	ENSMUSG00000070343	Gm10288	6.91333
ENSMUSG00000029377	Ereg	4.9697	ENSMUSG00000034430	Zxdc	2.03637	ENSMUSG00000032501	Trib1	2.9675	ENSMUSG00000070462	Mesdc1	2.99134
ENSMUSG00000029378	Areg	4.90547	ENSMUSG00000034593	Myo5a	3.50772	ENSMUSG00000032555	Topbp1	2.10787	ENSMUSG00000070692	Rps12-ps10	10.1905
ENSMUSG00000029394	Cdk2ap1	2.22222	ENSMUSG00000034595	Ppp1r18	2.125	ENSMUSG00000032586	Traip	4.12977	ENSMUSG00000070780	Rbm47	2.22581
ENSMUSG00000029408	Abcb9	4.4569	ENSMUSG00000034612	Chst11	5.91696	ENSMUSG00000032601	Prkar2a	2.16897	ENSMUSG00000070867	Trabd2b	6.36303
ENSMUSG00000029413	Naaa	6.15588	ENSMUSG00000034686	Prr7	4.42857	ENSMUSG00000032640	Chsy1	2.31373	ENSMUSG00000071265	1700086L19Rik	23.8226
ENSMUSG00000029414	Kntc1	3.7226	ENSMUSG00000034773	BC030867	11.3673	ENSMUSG00000032643	Fhl3	4.21728	ENSMUSG00000071369	Map3k5	2.68924
ENSMUSG00000029430	Ran	4.21209	ENSMUSG00000034883	Lrr1	5.75	ENSMUSG00000032717	Mdfi	2.52679	ENSMUSG00000071419	Rps15-ps2	7.66667
ENSMUSG00000029446	Psph	4.28067	ENSMUSG00000034906	Ncaph	4.39564	ENSMUSG00000032724	Abtb2	2.47588	ENSMUSG00000071478	Hist1h2ad	9.88571
ENSMUSG00000029447	Cct6a	2.78975	ENSMUSG00000034908	Sidt2	2.22716	ENSMUSG00000032726	Bmp8a	20.625	ENSMUSG00000071516	Hist1h2ai	7.54651
ENSMUSG00000029482	Aacs	2.37813	ENSMUSG00000034926	Dhcr24	5.33963	ENSMUSG00000032735	Ablim3	11.1873	ENSMUSG00000071528	Usmg5	3.54354
ENSMUSG00000029516	Cit	3.28767	ENSMUSG00000034936	Arl4d	2.59859	ENSMUSG00000032783	Troap	5.17391	ENSMUSG00000071604	Fam189a2	5.7334
ENSMUSG00000029521	Chek2	2.25223	ENSMUSG00000035020	Epgn	11.4815	ENSMUSG00000032796	Lama1	3.05051	ENSMUSG00000072692	Rpl37rt	4.04204
ENSMUSG00000029538	Srsf9	2.03868	ENSMUSG00000035049	Rrp12	2.91827	ENSMUSG00000032815	Fanca	2.37673	ENSMUSG00000072720	Myo18b	278.689
ENSMUSG00000029551	Psmg3	2.46769	ENSMUSG00000035085	1700020L24Rik	2.87097	ENSMUSG00000032860	P2ry2	3.45763	ENSMUSG00000072940	Gm10443	3.50279
ENSMUSG00000029554	Mad1l1	2.20925	ENSMUSG00000035095	Fam167a	4.23554	ENSMUSG00000032902	Slc16a1	4.01126	ENSMUSG00000073412	Lst1	2.52809
ENSMUSG00000029570	Lfng	2.78149	ENSMUSG00000035198	Tubg1	3.09141	ENSMUSG00000032911	Cspg4	2.10753	ENSMUSG00000073418	C4b	3.79214
ENSMUSG00000029580	Actb	2.01667	ENSMUSG00000035239	Neu3	2.54603	ENSMUSG00000032939	Nup93	2.33929	ENSMUSG00000073616	Myeov2	5.60241
ENSMUSG00000029581	Fscn1	22.1234	ENSMUSG00000035351	Nup37	2.99738	ENSMUSG00000033031	C330027C09Rik	4.15493	ENSMUSG00000074207	Adh1	5.30799
ENSMUSG00000029591	Ung	4.37647	ENSMUSG00000035365	Parpbp	7.42424	ENSMUSG00000033032	Afap1l1	4.01227	ENSMUSG00000074345	Tnfaip8l3	2.88222
ENSMUSG00000029610	Aimp2	2	ENSMUSG00000035455	Fignl1	6.2963	ENSMUSG00000033268	Duox1	2.54417	ENSMUSG00000074564	Gm10720	76.3415
ENSMUSG00000029623	Pdap1	2.09106	ENSMUSG00000035493	Tgfbi	5.27765	ENSMUSG00000033307	Mif	2.58546	ENSMUSG00000074800	Gm4149	9.29705
ENSMUSG00000029642	Polr1d	2.44132	ENSMUSG00000035557	Krt17	2.67906	ENSMUSG00000033450	Tagap	2.82857	ENSMUSG00000074813	Gm14005	3.38806
ENSMUSG00000029727	Cyp3a13	16.375	ENSMUSG00000035683	Melk	6.90256	ENSMUSG00000033589	Reep4	2.19582	ENSMUSG00000075014	Gm10800	82.6183
ENSMUSG00000029730	Mcm7	2.63004	ENSMUSG00000035704	Alg8	2.15837	ENSMUSG00000033762	Recql4	3.31884	ENSMUSG00000075015	Gm10801	117.234
ENSMUSG00000029752	Asns	2.90806	ENSMUSG00000035834	Polr3g	2.51082	ENSMUSG00000033765	Calm4	4.2702	ENSMUSG00000075031	Hist1h2bb	8.30968
ENSMUSG00000029761	Cald1	8.54783	ENSMUSG00000035861	Tmprss11b	7.34676	ENSMUSG00000033952	Aspm	4.26602	ENSMUSG00000075602	Ly6a	2.78618
ENSMUSG00000029772	Ahcyl2	2.00362	ENSMUSG00000035890	Rnf126	2.03997	ENSMUSG00000033985	Tesk2	2.06595	ENSMUSG00000075706	Gpx4	2.91641
ENSMUSG00000029777	Gars	3.22595	ENSMUSG00000035891	Cerk	2.46177	ENSMUSG00000034009	Rxfp1	13.5111	ENSMUSG00000075707	Dio3	7.99403
ENSMUSG00000029910	Mad2l1	6.76963	ENSMUSG00000035934	Pknox2	3.2988	ENSMUSG00000034023	Fancd2	3.15748	ENSMUSG00000075874	n-R5s1	92.9268
ENSMUSG00000029919	Hpgds	8.84015	ENSMUSG00000036078	Sigmar1	2.68312	ENSMUSG00000034112	Atp2c2	5.98881	ENSMUSG00000075918	n-R5s2	35.8333
ENSMUSG00000029924	Slc37a3	2.51553	ENSMUSG00000036111	Lmo1	3.51036	ENSMUSG00000034117	Ptgdr2	2.78652	ENSMUSG00000075973	n-R5s64	147.143
ENSMUSG00000030061	Uba3	2.12288	ENSMUSG00000036169	Sostdc1	2.74138	ENSMUSG00000034203	Chchd4	2.32842	ENSMUSG00000076135	Gm24276	5.0098
ENSMUSG00000030079	Ruvbl1	2.23023	ENSMUSG00000036181	Hist1h1c	2.22876	ENSMUSG00000034206	Polq	2.43529	ENSMUSG00000076236	Mir682	9.24625
ENSMUSG00000030127	Cops7a	2.09129	ENSMUSG00000036223	Ska1	7.61818	ENSMUSG00000034255	Arhgap27	2.25978	ENSMUSG00000076258	Gm23935	5.0927
ENSMUSG00000030137	Tuba8	20.2821	ENSMUSG00000036306	Lzts1	3.25876	ENSMUSG00000034271	Jdp2	2.55118	ENSMUSG00000076281	Gm24270	3.73601
ENSMUSG00000030214	Plbd1	6.65611	ENSMUSG00000036327	Qsox2	2.4181	ENSMUSG00000034311	Kif4	5.86389	ENSMUSG00000076436	Oxct2a	9.00369
ENSMUSG00000030224	Strap	2.40149	ENSMUSG00000036402	Gng12	2.05004	ENSMUSG00000034317	Trim59	3.36677	ENSMUSG00000077167	Gm24119	8.39231
ENSMUSG00000030225	Dera	2.4383	ENSMUSG00000036523	Greb1	174.661	ENSMUSG00000034329	Brip1	4.08834	ENSMUSG00000077192	Snora17	6.84091
ENSMUSG00000030254	Rad18	3.87118	ENSMUSG00000036672	Cenpt	2.26542	ENSMUSG00000034349	Smc4	2.25033	ENSMUSG00000077323	Rnu11	5.69427
ENSMUSG00000030256	Bhlhe41	5.02432	ENSMUSG00000036678	Aaas	3.13302	ENSMUSG00000034362	Csta1	7.73913	ENSMUSG00000077391	Gm24336	6.42358
ENSMUSG00000030265	Kras	3.6138	ENSMUSG00000036731	Cysrt1	4.15254	ENSMUSG00000034424	Gcsh	2.40299	ENSMUSG00000077505	Gm24233	9.11538
ENSMUSG00000030268	Bcat1	61.4118	ENSMUSG00000036768	Kif15	7.17457	ENSMUSG00000034593	Myo5a	3.05658	ENSMUSG00000077563	Snora68	7.42623
ENSMUSG00000030276	Ttll3	2.00443	ENSMUSG00000036777	Anln	10.299	ENSMUSG00000034595	Ppp1r18	2.45455	ENSMUSG00000077575	Gm24888	4.29167
ENSMUSG00000030298	Sec13	2.54566	ENSMUSG00000036825	Ssx2ip	2.37278	ENSMUSG00000034612	Chst11	5.84104	ENSMUSG00000077709	Snora64	5.18539
ENSMUSG00000030335	Mrpl51	2.0429	ENSMUSG00000036856	Wnt4	2.83399	ENSMUSG00000034640	Tiparp	3.6453	ENSMUSG00000077714	Snord17	4.48293
ENSMUSG00000030346	Rad51ap1	5.18085	ENSMUSG00000036875	Dna2	3.50877	ENSMUSG00000034773	BC030867	9.30612	ENSMUSG00000077734	Snord83b	4.84906
ENSMUSG00000030352	Tspan9	2.47288	ENSMUSG00000036902	Neto2	3.00633	ENSMUSG00000034883	Lrr1	6.30556	ENSMUSG00000078087	Rps12l1	9.94059
ENSMUSG00000030353	Tead4	4.02454	ENSMUSG00000036964	Trim17	2.32611	ENSMUSG00000034906	Ncaph	4.01869	ENSMUSG00000078117	Gm16485	2.88588
ENSMUSG00000030403	Vasp	2.51539	ENSMUSG00000037020	Wdr62	6.40171	ENSMUSG00000034908	Sidt2	2.99983	ENSMUSG00000078126	Rpl23a-ps3	3.89735
ENSMUSG00000030512	Snrpa1	2.81651	ENSMUSG00000037060	Prkcdbp	4.62611	ENSMUSG00000034926	Dhcr24	5.62617	ENSMUSG00000078144	Capns2	7.52542
ENSMUSG00000030513	Pcsk6	3.81311	ENSMUSG00000037152	Ndufc1	2.15861	ENSMUSG00000035020	Epgn	17.3519	ENSMUSG00000078154	Gm12184	3.91176
ENSMUSG00000030521	Mphosph10	2.19709	ENSMUSG00000037157	Il22ra1	2.41146	ENSMUSG00000035049	Rrp12	2.44873	ENSMUSG00000078193	Gm2000	6.5996
ENSMUSG00000030528	Blm	3.33763	ENSMUSG00000037278	Tmem97	4.52612	ENSMUSG00000035085	1700020L24Rik	3.10753	ENSMUSG00000078238	Gm12854	2.85333
ENSMUSG00000030559	Rab38	2.72872	ENSMUSG00000037313	Tacc3	6.82955	ENSMUSG00000035104	Eva1a	2.20468	ENSMUSG00000078532	Nkain1	4.14815
ENSMUSG00000030591	Psmd8	2.20728	ENSMUSG00000037376	Trmt6	2.22222	ENSMUSG00000035184	Fam124a	3.56391	ENSMUSG00000078776	9530053A07Rik	16.7692
ENSMUSG00000030603	Psmc4	2.63864	ENSMUSG00000037379	Spon2	3.50388	ENSMUSG00000035198	Tubg1	2.78976	ENSMUSG00000078974	Sec61g	4.60499
ENSMUSG00000030623	Prss23os	5.23482	ENSMUSG00000037466	4930427A07Rik	2.61433	ENSMUSG00000035239	Neu3	2.2254	ENSMUSG00000079018	Ly6c1	2.90114
ENSMUSG00000030641	Ddias	5.47594	ENSMUSG00000037474	Dtl	3.17384	ENSMUSG00000035349	Mia2	2.38281	ENSMUSG00000079451	Tmprss11g	25.8462
ENSMUSG00000030649	Anapc15	2.68687	ENSMUSG00000037490	Slc2a12	2.90585	ENSMUSG00000035351	Nup37	2.5958	ENSMUSG00000079465	Col4a3	5.36246
ENSMUSG00000030677	Kif22	6.10363	ENSMUSG00000037572	Wdhd1	3.91429	ENSMUSG00000035365	Parpbp	4.48485	ENSMUSG00000079523	Tmsb10	3.56835
ENSMUSG00000030693	Klk10	5.37255	ENSMUSG00000037577	Ephx3	5.92045	ENSMUSG00000035372	1810055G02Rik	2.00706	ENSMUSG00000079641	Rpl39	3.48861
ENSMUSG00000030748	Il4ra	5.0087	ENSMUSG00000037601	Nme1	3.17962	ENSMUSG00000035455	Fignl1	7.26389	ENSMUSG00000079942	Rpl28-ps3	7.74468
ENSMUSG00000030750	Nsmce1	2.17892	ENSMUSG00000037628	Cdkn3	10	ENSMUSG00000035493	Tgfbi	3.9958	ENSMUSG00000080365	Gm25776	20.7193
ENSMUSG00000030751	Psma1	2.22541	ENSMUSG00000037679	Inf2	2.55653	ENSMUSG00000035557	Krt17	2.97208	ENSMUSG00000080374	Gm22953	3.14745
ENSMUSG00000030790	Adm	3.44737	ENSMUSG00000037725	Ckap2	8.69811	ENSMUSG00000035683	Melk	6.32821	ENSMUSG00000080440	Gm25848	15.8649
ENSMUSG00000030793	Pycard	2.21007	ENSMUSG00000037762	Slc16a9	4.65946	ENSMUSG00000035834	Polr3g	2.66466	ENSMUSG00000080465	Gm22486	4.6601
ENSMUSG00000030844	Rgs10	10.9529	ENSMUSG00000037892	Pcdh18	6.89892	ENSMUSG00000035861	Tmprss11b	10.5221	ENSMUSG00000080538	Gm25541	9.04878
ENSMUSG00000030867	Plk1	3.02823	ENSMUSG00000037894	H2afz	2.688	ENSMUSG00000035890	Rnf126	2.0255	ENSMUSG00000080542	Gm22710	10.4444
ENSMUSG00000030879	Mrpl17	2.51907	ENSMUSG00000037902	Sirpa	2.22856	ENSMUSG00000035934	Pknox2	4.82072	ENSMUSG00000080848	Gm9385	5.59538
ENSMUSG00000030978	Rrm1	2.71694	ENSMUSG00000037936	Scarb1	2.52174	ENSMUSG00000035983	Gm7008	3.06786	ENSMUSG00000080921	Rpl38-ps2	3.4
ENSMUSG00000031004	Mki67	4.93037	ENSMUSG00000037972	Snn	3.7205	ENSMUSG00000036002	Fam214b	2.26734	ENSMUSG00000081051	Gm15427	3.74763
ENSMUSG00000031097	Tnni2	4.05	ENSMUSG00000037995	Igsf9	3.23511	ENSMUSG00000036046	5031439G07Rik	2.33625	ENSMUSG00000081094	Rpl19-ps11	4.44573
ENSMUSG00000031146	Plp2	2.31918	ENSMUSG00000038020	Rapgefl1	2.00661	ENSMUSG00000036078	Sigmar1	2.27838	ENSMUSG00000081214	Rpl35a-ps2	6.61644
ENSMUSG00000031149	Praf2	2.3758	ENSMUSG00000038168	P3h2	3.87488	ENSMUSG00000036109	Mbnl3	2.25928	ENSMUSG00000081223	Gm12247	2.41573
ENSMUSG00000031207	Msn	3.4161	ENSMUSG00000038279	Nop2	2.29869	ENSMUSG00000036136	Fam110c	2.87622	ENSMUSG00000081344	Gm14303	4.32521
ENSMUSG00000031217	Efnb1	2.40364	ENSMUSG00000038295	Atg9b	5.5303	ENSMUSG00000036168	Ccdc38	2.50207	ENSMUSG00000081378	Rps13-ps4	6.24545
ENSMUSG00000031226	Pbdc1	2.61859	ENSMUSG00000038354	Ankrd35	3.94137	ENSMUSG00000036223	Ska1	5.41818	ENSMUSG00000081400	Gm13680	3.62032
ENSMUSG00000031231	Cox7b	2.06202	ENSMUSG00000038375	Trp53inp2	4.30869	ENSMUSG00000036306	Lzts1	4.01617	ENSMUSG00000081406	Rps6-ps4	4.09186
ENSMUSG00000031262	Cenpi	3.94211	ENSMUSG00000038379	Ttk	9.4252	ENSMUSG00000036327	Qsox2	2.34667	ENSMUSG00000081434	Gm14165	5.74634
ENSMUSG00000031278	Acsl4	2.49686	ENSMUSG00000038412	Higd1a	6.04071	ENSMUSG00000036390	Gadd45a	2.62984	ENSMUSG00000081485	Gm12338	3.55172
ENSMUSG00000031349	Nsdhl	2.72025	ENSMUSG00000038482	Tfdp1	2.48603	ENSMUSG00000036402	Gng12	2.88102	ENSMUSG00000081855	Rpl17-ps5	8.44118
ENSMUSG00000031372	Trex2	21.2917	ENSMUSG00000038560	Sp6	2.54335	ENSMUSG00000036432	Siah2	2.60671	ENSMUSG00000081895	Rpl17-ps10	3.08434
ENSMUSG00000031383	Dusp9	4.81395	ENSMUSG00000038600	Atp6v0a4	2.96703	ENSMUSG00000036523	Greb1	209.068	ENSMUSG00000081926	Gm15536	3.75269
ENSMUSG00000031400	G6pdx	3.94636	ENSMUSG00000038602	Slc35f1	10.9444	ENSMUSG00000036672	Cenpt	2.18499	ENSMUSG00000081974	Gm11960	3.97436
ENSMUSG00000031402	Mpp1	2.63742	ENSMUSG00000038644	Pold1	2.09774	ENSMUSG00000036676	Tmtc3	2.00949	ENSMUSG00000082035	Rpl17-ps8	17.7143
ENSMUSG00000031403	Dkc1	2.68587	ENSMUSG00000038930	Rccd1	2.75129	ENSMUSG00000036678	Aaas	2.43705	ENSMUSG00000082071	Pramel	1120
ENSMUSG00000031422	Morf4l2	2.54055	ENSMUSG00000038943	Prc1	6.31361	ENSMUSG00000036731	Cysrt1	4.49153	ENSMUSG00000082109	Rpl19-ps12	13.45
ENSMUSG00000031490	Eif4ebp1	3.28571	ENSMUSG00000039055	Eme1	2.10388	ENSMUSG00000036768	Kif15	5.41379	ENSMUSG00000082171	Rpl27-ps2	7
ENSMUSG00000031519	Asb5	2.05245	ENSMUSG00000039187	Fanci	2.51256	ENSMUSG00000036777	Anln	9.25086	ENSMUSG00000082399	Gm14036	12.4737
ENSMUSG00000031578	Mak16	2.00589	ENSMUSG00000039197	Adk	2.28804	ENSMUSG00000036825	Ssx2ip	2.8989	ENSMUSG00000082419	Gm11425	6.33803
ENSMUSG00000031590	Frg1	2.03287	ENSMUSG00000039217	Il18	5.54902	ENSMUSG00000036856	Wnt4	3.11123	ENSMUSG00000082465	Rps6-ps3	3.32432
ENSMUSG00000031604	Msmo1	3.50835	ENSMUSG00000039239	Tgfb2	2.10904	ENSMUSG00000036875	Dna2	4.92982	ENSMUSG00000082609	Gm15464	5.98077
ENSMUSG00000031647	Mfap3l	2.53995	ENSMUSG00000039275	Foxk2	2.02662	ENSMUSG00000036894	Rap2b	2.43414	ENSMUSG00000082806	Rpl13-ps1	5.91228
ENSMUSG00000031657	Heatr3	2.05195	ENSMUSG00000039323	Igfbp2	50.4883	ENSMUSG00000036902	Neto2	3.13291	ENSMUSG00000082816	Gm11953	8.26667
ENSMUSG00000031669	Gins3	3.61798	ENSMUSG00000039395	Mreg	2.609	ENSMUSG00000036960	Clca2	2.54425	ENSMUSG00000082901	Gm14323	3.38482
ENSMUSG00000031683	Lsm6	2.38528	ENSMUSG00000039396	Neil3	3.08197	ENSMUSG00000036964	Trim17	2.026	ENSMUSG00000083022	Rps15a-ps6	7.21277
ENSMUSG00000031697	Orc6	2.01163	ENSMUSG00000039405	Prss23	3.03935	ENSMUSG00000037020	Wdr62	5.5812	ENSMUSG00000083087	Gm11249	5.39474
ENSMUSG00000031700	Gpt2	2.75341	ENSMUSG00000039497	Dse	2.4124	ENSMUSG00000037060	Prkcdbp	4.12463	ENSMUSG00000083328	Gm11826	5.36364
ENSMUSG00000031756	Cenpn	4.78472	ENSMUSG00000039628	Hs3st6	2.97222	ENSMUSG00000037151	Lrrc20	2.22464	ENSMUSG00000083337	Gm11539	4.61972
ENSMUSG00000031799	Tpm4	2.56383	ENSMUSG00000039748	Exo1	3.74342	ENSMUSG00000037188	Grhl3	2.54532	ENSMUSG00000083382	Gm6433	6.06818
ENSMUSG00000031824	6430548M08Rik	4.64909	ENSMUSG00000039887	Alg14	2.22526	ENSMUSG00000037278	Tmem97	3.07836	ENSMUSG00000083483	Gm14044	14.7609
ENSMUSG00000031827	Cotl1	19.3733	ENSMUSG00000039994	Timeless	4.3323	ENSMUSG00000037313	Tacc3	6.21023	ENSMUSG00000083496	Gm11263	4.49091
ENSMUSG00000031838	Ifi30	2.67598	ENSMUSG00000040010	Slc7a5	6.56996	ENSMUSG00000037376	Trmt6	2.05556	ENSMUSG00000083563	Gm13340	3.06429
ENSMUSG00000031843	Mphosph6	2.47382	ENSMUSG00000040034	Nup43	2.20243	ENSMUSG00000037390	Muc3	1015	ENSMUSG00000083619	Gm14414	3.28219
ENSMUSG00000031848	Lsm4	2.16225	ENSMUSG00000040055	Gjb6	22.7818	ENSMUSG00000037411	Serpine1	3.34624	ENSMUSG00000083621	Gm14586	3.65659
ENSMUSG00000031861	Lpar2	2.01413	ENSMUSG00000040084	Bub1b	11.4147	ENSMUSG00000037466	4930427A07Rik	2.91126	ENSMUSG00000083705	Gm8624	8
ENSMUSG00000031870	Pgr	43.4325	ENSMUSG00000040204	2810417H13Rik	10.9588	ENSMUSG00000037474	Dtl	4.28674	ENSMUSG00000083716	Gm13436	5
ENSMUSG00000031910	Has3	2.40858	ENSMUSG00000040212	Emp3	4	ENSMUSG00000037490	Slc2a12	2.76034	ENSMUSG00000083757	Rps15a-ps4	8.69231
ENSMUSG00000031917	Nip7	2.04859	ENSMUSG00000040254	Sema3d	2.49542	ENSMUSG00000037572	Wdhd1	4.31714	ENSMUSG00000083911	Gm4342	7.62963
ENSMUSG00000031931	Ankrd49	2.15235	ENSMUSG00000040280	Ndufa4l2	4.64583	ENSMUSG00000037577	Ephx3	5.375	ENSMUSG00000083992	Gm11478	4.32319
ENSMUSG00000031936	Hephl1	48.8	ENSMUSG00000040354	Mars	2.17257	ENSMUSG00000037601	Nme1	3.60924	ENSMUSG00000084106	Gm6136	3.34295
ENSMUSG00000031960	Aars	2.83269	ENSMUSG00000040432	Ltb4r2	3.39815	ENSMUSG00000037628	Cdkn3	5.94286	ENSMUSG00000084111	Gm15710	4.71277
ENSMUSG00000032012	Nectin1	2.4461	ENSMUSG00000040471	Ggt6	3.18605	ENSMUSG00000037679	Inf2	2.49425	ENSMUSG00000084131	Rpl3-ps2	3.54023
ENSMUSG00000032026	Rexo2	2.33281	ENSMUSG00000040653	Ppp1r14c	2.2957	ENSMUSG00000037725	Ckap2	5.66981	ENSMUSG00000084235	Gm15421	2.6
ENSMUSG00000032076	Cadm1	2.03757	ENSMUSG00000040658	Dnph1	4.92	ENSMUSG00000037887	Dusp8	2.24842	ENSMUSG00000084265	Gm14541	5.78481
ENSMUSG00000032092	Mpzl2	3.10958	ENSMUSG00000040675	Mthfd1l	4.04237	ENSMUSG00000037892	Pcdh18	6.10108	ENSMUSG00000084314	Rps15a-ps3	9.75439
ENSMUSG00000032113	Chek1	3.80906	ENSMUSG00000040690	Col16a1	2.68733	ENSMUSG00000037894	H2afz	2.64939	ENSMUSG00000084319	Tpt1-ps3	3.26361
ENSMUSG00000032218	Ccnb2	11.497	ENSMUSG00000040767	Snrnp25	3.32857	ENSMUSG00000037936	Scarb1	2.62319	ENSMUSG00000084416	Rpl10a-ps1	6.91765
ENSMUSG00000032224	Fam81a	8.53535	ENSMUSG00000040808	S100g	6.61628	ENSMUSG00000037972	Snn	2.4559	ENSMUSG00000084421	Gm25107	5.62121
ENSMUSG00000032254	Kif23	3.9434	ENSMUSG00000041025	Iffo2	3.57584	ENSMUSG00000037995	Igsf9	4.22672	ENSMUSG00000084708	Gm22988	4.57125
ENSMUSG00000032261	Sh3bgrl2	2.03261	ENSMUSG00000041064	Pif1	9.5122	ENSMUSG00000038020	Rapgefl1	2.39859	ENSMUSG00000084744	Gm25291	4.22424
ENSMUSG00000032281	Acsbg1	7.60894	ENSMUSG00000041219	Arhgap11a	5.48555	ENSMUSG00000038151	Prdm1	8.02857	ENSMUSG00000084817	Gm5526	3.99029
ENSMUSG00000032294	Pkm	2.79315	ENSMUSG00000041220	Elovl6	5.25674	ENSMUSG00000038168	P3h2	2.70521	ENSMUSG00000085023	Gm12744	11
ENSMUSG00000032301	Psma4	2.22611	ENSMUSG00000041313	Slc7a1	3.98544	ENSMUSG00000038172	Ttc39b	2.81707	ENSMUSG00000085156	Snhg15	3.74929
ENSMUSG00000032313	Tmem266	2.79288	ENSMUSG00000041355	Ssr2	2.12607	ENSMUSG00000038295	Atg9b	3.07576	ENSMUSG00000085241	Snhg3	7.59802
ENSMUSG00000032318	Isl2	2.81818	ENSMUSG00000041431	Ccnb1	20.25	ENSMUSG00000038352	Arl5c	4.01695	ENSMUSG00000085314	Gm14866	7.84259
ENSMUSG00000032344	Mb21d1	2.77055	ENSMUSG00000041498	Kif14	8.4153	ENSMUSG00000038354	Ankrd35	3.49837	ENSMUSG00000085342	Gm12254	5.4375
ENSMUSG00000032397	Tipin	3.0335	ENSMUSG00000041506	Rrp9	2.05981	ENSMUSG00000038375	Trp53inp2	8.22514	ENSMUSG00000085363	Gm15478	2.86076
ENSMUSG00000032400	Zwilch	5.10317	ENSMUSG00000041782	Lad1	2.25315	ENSMUSG00000038379	Ttk	7.11811	ENSMUSG00000085385	Snhg17	3.70302
ENSMUSG00000032412	Atp1b3	2.47331	ENSMUSG00000041840	Haus1	2.43432	ENSMUSG00000038400	Pmepa1	2.45121	ENSMUSG00000085442	Gm3362	4.62264
ENSMUSG00000032454	Rbp2	44.5	ENSMUSG00000041859	Mcm3	4.688	ENSMUSG00000038412	Higd1a	4.0687	ENSMUSG00000085521	4930526A20Rik	4.3125
ENSMUSG00000032456	Nmnat3	2.26879	ENSMUSG00000041920	Slc16a6	6.66505	ENSMUSG00000038482	Tfdp1	2.69484	ENSMUSG00000085560	C230038L03Rik	7.16327
ENSMUSG00000032459	Mrps22	2.37721	ENSMUSG00000041939	Mvk	3.95251	ENSMUSG00000038550	Ciart	6.77778	ENSMUSG00000086324	Gm15564	5.28151
ENSMUSG00000032479	Map4	2.8033	ENSMUSG00000042029	Ncapg2	3.38344	ENSMUSG00000038560	Sp6	2.28324	ENSMUSG00000086373	Gm11978	47.956
ENSMUSG00000032487	Ptgs2	5.11239	ENSMUSG00000042035	Igsf3	2.12602	ENSMUSG00000038602	Slc35f1	15.5741	ENSMUSG00000086567	Gm2830	2.50367
ENSMUSG00000032555	Topbp1	2.31054	ENSMUSG00000042106	Fam212a	2.2449	ENSMUSG00000038644	Pold1	2.42707	ENSMUSG00000086717	Gm15655	2.47696
ENSMUSG00000032586	Traip	4.72519	ENSMUSG00000042148	Cox10	2.22248	ENSMUSG00000038930	Rccd1	2.53002	ENSMUSG00000086841	2410006H16Rik	2.33333
ENSMUSG00000032601	Prkar2a	2.26364	ENSMUSG00000042286	Stab1	21.275	ENSMUSG00000038943	Prc1	5.44083	ENSMUSG00000086859	Snhg20	8.94659
ENSMUSG00000032643	Fhl3	4.65185	ENSMUSG00000042306	S100a14	3.1348	ENSMUSG00000038963	Slco4a1	2.56402	ENSMUSG00000086938	4930481A15Rik	2.2437
ENSMUSG00000032702	Kank1	2.35312	ENSMUSG00000042357	Gjb5	4.96403	ENSMUSG00000039041	Adrm1	2.07875	ENSMUSG00000086962	Gm12248	60.3504
ENSMUSG00000032717	Mdfi	2.30893	ENSMUSG00000042377	Fam83g	2.18165	ENSMUSG00000039055	Eme1	2.22438	ENSMUSG00000087002	Gm16277	9.09459
ENSMUSG00000032735	Ablim3	15.5477	ENSMUSG00000042462	Dctpp1	2.75117	ENSMUSG00000039187	Fanci	2.09883	ENSMUSG00000087047	1700110K17Rik	10.7273
ENSMUSG00000032740	Ccdc88a	3.80105	ENSMUSG00000042489	Clspn	6.48837	ENSMUSG00000039197	Adk	2.22283	ENSMUSG00000087261	Gm15477	2.784
ENSMUSG00000032783	Troap	4.78261	ENSMUSG00000042688	Mapk6	2.23172	ENSMUSG00000039217	Il18	5.72549	ENSMUSG00000087302	Sox5os1	3.33333
ENSMUSG00000032796	Lama1	6.42424	ENSMUSG00000043067	Dpy19l1	2.04789	ENSMUSG00000039239	Tgfb2	2.22181	ENSMUSG00000087412	Gm15501	5.05051
ENSMUSG00000032860	P2ry2	6.64972	ENSMUSG00000043068	Fam89a	3.07955	ENSMUSG00000039313	AF529169	22.9459	ENSMUSG00000087470	A630031M04Rik	54.878
ENSMUSG00000032902	Slc16a1	4.10253	ENSMUSG00000043091	Tuba1c	2.06979	ENSMUSG00000039323	Igfbp2	66.0779	ENSMUSG00000087623	Gm12404	2.55952
ENSMUSG00000032939	Nup93	2.71173	ENSMUSG00000043165	Lor	17.4839	ENSMUSG00000039372	March4	3.38333	ENSMUSG00000087687	Pet100	6.87692
ENSMUSG00000032966	Fkbp1a	2.09763	ENSMUSG00000043430	Psapl1	3.81041	ENSMUSG00000039384	Dusp10	2.59801	ENSMUSG00000087698	Gm13031	70.8197
ENSMUSG00000033031	C330027C09Rik	5.61972	ENSMUSG00000043439	E130012A19Rik	3.10072	ENSMUSG00000039395	Mreg	2.85725	ENSMUSG00000087775	Rprl2	19.4
ENSMUSG00000033032	Afap1l1	6.37117	ENSMUSG00000043557	Mdga1	30.4242	ENSMUSG00000039396	Neil3	2.70492	ENSMUSG00000087819	Gm25117	3.91451
ENSMUSG00000033268	Duox1	2.2301	ENSMUSG00000043639	Rbm20	6.76562	ENSMUSG00000039405	Prss23	8.16204	ENSMUSG00000087935	Snora81	7.41093
ENSMUSG00000033294	Noc4l	2.14405	ENSMUSG00000043681	Fam25c	23.0568	ENSMUSG00000039497	Dse	2.41085	ENSMUSG00000087943	Gm24245	6.38961
ENSMUSG00000033307	Mif	3.0522	ENSMUSG00000043811	Rtn4r	6.81818	ENSMUSG00000039628	Hs3st6	3.16667	ENSMUSG00000087963	Gm25394	6.72115
ENSMUSG00000033356	Pus7l	2.04872	ENSMUSG00000044005	Gls2	8.96429	ENSMUSG00000039748	Exo1	4.65132	ENSMUSG00000087968	Gm25395	6.45652
ENSMUSG00000033498	Strc	2.76437	ENSMUSG00000044041	Krt13	7.01175	ENSMUSG00000039887	Alg14	2.04949	ENSMUSG00000088008	Gm25492	3.91667
ENSMUSG00000033589	Reep4	2.39077	ENSMUSG00000044201	Cdc25c	11.1455	ENSMUSG00000039994	Timeless	4.82919	ENSMUSG00000088025	Rprl3	11.7948
ENSMUSG00000033752	Mnd1	2.38906	ENSMUSG00000044313	Mab21l3	2.32099	ENSMUSG00000040010	Slc7a5	8.79928	ENSMUSG00000088059	Mir1949	11.2381
ENSMUSG00000033762	Recql4	3.04348	ENSMUSG00000044322	Dsc1	16.1333	ENSMUSG00000040034	Nup43	2.03441	ENSMUSG00000088088	Rmrp	7.62931
ENSMUSG00000033765	Calm4	6.89899	ENSMUSG00000044337	Ackr3	3.92089	ENSMUSG00000040055	Gjb6	23.4182	ENSMUSG00000088158	Scarna3b	6.95402
ENSMUSG00000033809	Alg3	2.15238	ENSMUSG00000044912	Syt16	7.29245	ENSMUSG00000040078	Gm9769	2.39019	ENSMUSG00000088208	Gm23751	7.75676
ENSMUSG00000033952	Aspm	4.5301	ENSMUSG00000044948	Cfap43	2.66211	ENSMUSG00000040084	Bub1b	9.39171	ENSMUSG00000088246	Gm25911	7.21698
ENSMUSG00000033953	Ppp3r1	2.02246	ENSMUSG00000045273	Cenph	4.09278	ENSMUSG00000040152	Thbs1	3.77907	ENSMUSG00000088529	Gm26083	11.1386
ENSMUSG00000033970	Rfc3	2.05764	ENSMUSG00000045294	Insig1	3.25881	ENSMUSG00000040204	2810417H13Rik	10.7371	ENSMUSG00000088609	Gm24187	4.28029
ENSMUSG00000034009	Rxfp1	10.9644	ENSMUSG00000045328	Cenpe	8.35294	ENSMUSG00000040432	Ltb4r2	2.21296	ENSMUSG00000088856	Gm24727	12.1842
ENSMUSG00000034023	Fancd2	2.87795	ENSMUSG00000045349	Sh2d5	18.3333	ENSMUSG00000040471	Ggt6	2.13953	ENSMUSG00000088948	Gm23262	5.04158
ENSMUSG00000034024	Cct2	2.09769	ENSMUSG00000045545	Krt14	7.23115	ENSMUSG00000040548	Tex2	3.02989	ENSMUSG00000088990	Gm22767	18.2419
ENSMUSG00000034112	Atp2c2	4.93284	ENSMUSG00000045679	Pqlc3	4.01142	ENSMUSG00000040653	Ppp1r14c	2.63146	ENSMUSG00000089255	Snora78	3.84439
ENSMUSG00000034203	Chchd4	2.57263	ENSMUSG00000045751	Mms22l	2.38065	ENSMUSG00000040658	Dnph1	4.456	ENSMUSG00000089281	Scarna6	6.75352
ENSMUSG00000034206	Polq	2.85882	ENSMUSG00000046056	Sbsn	3.20657	ENSMUSG00000040663	Clcf1	3.93939	ENSMUSG00000089536	Scarna3a	5.81313
ENSMUSG00000034255	Arhgap27	2.39399	ENSMUSG00000046179	E2f8	6.13441	ENSMUSG00000040675	Mthfd1l	4.70621	ENSMUSG00000089617	Scarna10	5.09792
ENSMUSG00000034271	Jdp2	2.62292	ENSMUSG00000046186	Cd109	4.55917	ENSMUSG00000040681	Hmgn1	2.43855	ENSMUSG00000089635	Gm16559	4.76882
ENSMUSG00000034311	Kif4	6.17778	ENSMUSG00000046203	Sprr2g	9.5375	ENSMUSG00000040690	Col16a1	2.04063	ENSMUSG00000089764	Gm16580	4.61
ENSMUSG00000034317	Trim59	4.57042	ENSMUSG00000046295	Ankle1	8.21212	ENSMUSG00000040703	Cyp2s1	2.261	ENSMUSG00000089782	Gm3531	5.19718
ENSMUSG00000034329	Brip1	4.42756	ENSMUSG00000046337	Fam178b	12.45	ENSMUSG00000040749	Siah1b	2.29448	ENSMUSG00000089855	Gm15662	5.28076
ENSMUSG00000034333	Zbed4	2.14644	ENSMUSG00000046352	Gjb2	5.99541	ENSMUSG00000040767	Snrnp25	3.02857	ENSMUSG00000089993	Gm5822	2.97101
ENSMUSG00000034349	Smc4	2.47706	ENSMUSG00000046402	Rbp1	9.82653	ENSMUSG00000040808	S100g	14.1163	ENSMUSG00000090136	Gm10177	17.95
ENSMUSG00000034362	Csta1	9.85217	ENSMUSG00000046410	Kcnk6	3.10687	ENSMUSG00000040918	Slc19a2	2.05128	ENSMUSG00000090291	Lrrc10b	35.7333
ENSMUSG00000034403	Pja1	2.03126	ENSMUSG00000046546	Fam43a	15.2745	ENSMUSG00000041000	Trim62	2.90668	ENSMUSG00000090485	Gm17416	17.5217
ENSMUSG00000034424	Gcsh	2.95647	ENSMUSG00000046591	Ticrr	4.70817	ENSMUSG00000041025	Iffo2	2.19195	ENSMUSG00000090588	Gm9573	71.1475
ENSMUSG00000034593	Myo5a	3.28935	ENSMUSG00000046598	Bdh1	6.07712	ENSMUSG00000041064	Pif1	6.60976	ENSMUSG00000090733	Rps27	3.03669
ENSMUSG00000034595	Ppp1r18	2.6875	ENSMUSG00000046623	Gjb4	3.12281	ENSMUSG00000041219	Arhgap11a	4.43738	ENSMUSG00000090965	Gm17203	3.28689
ENSMUSG00000034612	Chst11	5.35113	ENSMUSG00000046687	Gm5424	4	ENSMUSG00000041220	Elovl6	4.54477	ENSMUSG00000091021	Gm17300	8.35996
ENSMUSG00000034663	Bmp2k	2.07326	ENSMUSG00000046834	Krt1	3.62466	ENSMUSG00000041313	Slc7a1	3.07689	ENSMUSG00000091028	Gm10722	208.25
ENSMUSG00000034667	Xpot	2.0547	ENSMUSG00000046908	Ltb4r1	3.94245	ENSMUSG00000041431	Ccnb1	16.2812	ENSMUSG00000091086	Rpl6l	4.22378
ENSMUSG00000034768	Asb16	2.55862	ENSMUSG00000046997	Spsb4	6.73469	ENSMUSG00000041498	Kif14	5.34973	ENSMUSG00000091228	Gm20390	4.33609
ENSMUSG00000034773	BC030867	9.57143	ENSMUSG00000047246	Hist1h2be	3.13507	ENSMUSG00000041782	Lad1	2.13434	ENSMUSG00000091315	Gm17214	4.61538
ENSMUSG00000034883	Lrr1	6.66667	ENSMUSG00000047250	Ptgs1	4.39054	ENSMUSG00000041840	Haus1	2.15818	ENSMUSG00000091423	Gm17509	4.91282
ENSMUSG00000034906	Ncaph	4.41433	ENSMUSG00000047261	Gap43	15.2914	ENSMUSG00000041859	Mcm3	5.379	ENSMUSG00000091449	Gm10269	3.96154
ENSMUSG00000034908	Sidt2	3.7145	ENSMUSG00000047281	Sfn	3.63977	ENSMUSG00000041895	Wipi1	2.04898	ENSMUSG00000091460	Gm7808	8.47778
ENSMUSG00000034926	Dhcr24	7.46729	ENSMUSG00000047414	Flrt2	4.43576	ENSMUSG00000041920	Slc16a6	6.15291	ENSMUSG00000091537	Tma7	3.89732
ENSMUSG00000034936	Arl4d	2.33099	ENSMUSG00000047446	Arl4a	2.27812	ENSMUSG00000041939	Mvk	2.90501	ENSMUSG00000091845	Gm4604	9.67347
ENSMUSG00000035020	Epgn	7.48148	ENSMUSG00000047534	Mis18bp1	4.7931	ENSMUSG00000041959	S100a10	2.3485	ENSMUSG00000091955	Gm9844	7.96774
ENSMUSG00000035049	Rrp12	2.62375	ENSMUSG00000047787	Flrt1	10.4454	ENSMUSG00000042029	Ncapg2	4.11703	ENSMUSG00000091971	Hspa1a	4.17711
ENSMUSG00000035085	1700020L24Rik	2.74194	ENSMUSG00000047832	Cdca4	2.26835	ENSMUSG00000042035	Igsf3	2.11139	ENSMUSG00000092203	1110038B12Rik	2.49235
ENSMUSG00000035104	Eva1a	2.38889	ENSMUSG00000047875	Gpr157	2.39722	ENSMUSG00000042225	Ammecr1	2.13619	ENSMUSG00000092674	Gm24105	56
ENSMUSG00000035183	Slc24a5	2.17222	ENSMUSG00000048058	Ldlrad3	2.89902	ENSMUSG00000042251	Pm20d1	6.05128	ENSMUSG00000092702	Gm24514	18.2381
ENSMUSG00000035184	Fam124a	2.5188	ENSMUSG00000048078	Tenm4	4.6093	ENSMUSG00000042286	Stab1	8.575	ENSMUSG00000092730	Snora24	4.78125
ENSMUSG00000035198	Tubg1	3.71664	ENSMUSG00000048087	Gm4737	3.51344	ENSMUSG00000042306	S100a14	2.98298	ENSMUSG00000092746	Rn7s6	10.4775
ENSMUSG00000035215	Lsm7	2.33903	ENSMUSG00000048142	Nat8l	12.7727	ENSMUSG00000042357	Gjb5	5.05755	ENSMUSG00000092805	Gm26461	20.0172
ENSMUSG00000035239	Neu3	3.06667	ENSMUSG00000048327	Ckap2l	4.05818	ENSMUSG00000042489	Clspn	6.75581	ENSMUSG00000092819	Gm23639	11.7161
ENSMUSG00000035349	Mia2	3.02344	ENSMUSG00000048399	Tprg	11.3889	ENSMUSG00000042688	Mapk6	2.94265	ENSMUSG00000092837	Rpph1	8.51945
ENSMUSG00000035351	Nup37	3.25197	ENSMUSG00000048402	Gli2	2.91765	ENSMUSG00000042988	Notum	65.8333	ENSMUSG00000092907	Mir5132	2.19084
ENSMUSG00000035365	Parpbp	5.9899	ENSMUSG00000048458	Fam212b	4.06809	ENSMUSG00000043068	Fam89a	2.90909	ENSMUSG00000093044	Snord8	4.46207
ENSMUSG00000035443	Thyn1	2.08241	ENSMUSG00000048578	Mlec	2.28222	ENSMUSG00000043091	Tuba1c	2.31788	ENSMUSG00000093064	Gm23153	16.8462
ENSMUSG00000035455	Fignl1	9.1713	ENSMUSG00000048699	Krt90	4.7451	ENSMUSG00000043415	Otud1	2.72883	ENSMUSG00000093283	Gm22567	156.667
ENSMUSG00000035493	Tgfbi	3.76768	ENSMUSG00000048826	Dact2	2.65806	ENSMUSG00000043430	Psapl1	3.02974	ENSMUSG00000093355	Snora26	10.8558
ENSMUSG00000035557	Krt17	3.97613	ENSMUSG00000048922	Cdca2	4.49026	ENSMUSG00000043439	E130012A19Rik	3.34532	ENSMUSG00000093413	Snora15	7.09589
ENSMUSG00000035637	Grhpr	2.04578	ENSMUSG00000049036	Tmem121	6.91176	ENSMUSG00000043557	Mdga1	30.3636	ENSMUSG00000093674	Rpl41	5.85478
ENSMUSG00000035683	Melk	6.84103	ENSMUSG00000049112	Oxtr	5.80874	ENSMUSG00000043639	Rbm20	6.67969	ENSMUSG00000093843	Gm25939	18.9688
ENSMUSG00000035834	Polr3g	3.20433	ENSMUSG00000049327	Kmt5a	2.79353	ENSMUSG00000043681	Fam25c	21.2955	ENSMUSG00000093862	Gm5117	141.429
ENSMUSG00000035861	Tmprss11b	14.3705	ENSMUSG00000049539	Hist1h1a	7.44195	ENSMUSG00000044005	Gls2	11.3214	ENSMUSG00000093893	n-R5s124	56.9091
ENSMUSG00000035890	Rnf126	2.30669	ENSMUSG00000049565	Aknad1	9.02985	ENSMUSG00000044041	Krt13	13.0889	ENSMUSG00000093956	Gm24497	18.3917
ENSMUSG00000035934	Pknox2	6.01195	ENSMUSG00000049598	Vsig8	4.52577	ENSMUSG00000044201	Cdc25c	9.21818	ENSMUSG00000094050	Gm23472	18.0902
ENSMUSG00000035960	Apex1	2.16385	ENSMUSG00000049699	Ucn2	3.73469	ENSMUSG00000044322	Dsc1	6.83333	ENSMUSG00000094338	Hist1h2bl	4.14423
ENSMUSG00000036046	5031439G07Rik	2.44931	ENSMUSG00000049721	Gal3st1	6.2327	ENSMUSG00000044337	Ackr3	2.97778	ENSMUSG00000094344	Gm11942	14.8333
ENSMUSG00000036078	Sigmar1	2.6614	ENSMUSG00000049858	Suox	2.85106	ENSMUSG00000044894	Uqcrq	2.19584	ENSMUSG00000094377	Gm24407	10.2173
ENSMUSG00000036109	Mbnl3	2.20409	ENSMUSG00000049881	2810025M15Rik	3.68182	ENSMUSG00000044912	Syt16	9	ENSMUSG00000094405	Gm23143	11.1429
ENSMUSG00000036168	Ccdc38	2.60744	ENSMUSG00000049932	H2afx	6.40362	ENSMUSG00000044948	Cfap43	2.19474	ENSMUSG00000094411	Snord16a	3.46512
ENSMUSG00000036223	Ska1	6.27273	ENSMUSG00000050107	Gsg2	5.71429	ENSMUSG00000045005	Fzd5	2.84501	ENSMUSG00000094655	Gm25360	9.31103
ENSMUSG00000036306	Lzts1	3.20216	ENSMUSG00000050108	Bpifc	25.5833	ENSMUSG00000045273	Cenph	5.2268	ENSMUSG00000094668	Gm24871	6.10811
ENSMUSG00000036327	Qsox2	2.52571	ENSMUSG00000050558	Prokr2	384.194	ENSMUSG00000045328	Cenpe	5.31176	ENSMUSG00000094751	Gm25018	56.9091
ENSMUSG00000036402	Gng12	2.01356	ENSMUSG00000050635	Sprr2f	4.30303	ENSMUSG00000045349	Sh2d5	32.75	ENSMUSG00000094814	Gm21973	8.14286
ENSMUSG00000036523	Greb1	191.153	ENSMUSG00000050860	Phospho1	4.21045	ENSMUSG00000045545	Krt14	5.23234	ENSMUSG00000094830	n-R5s194	87.1667
ENSMUSG00000036639	Nudt1	2.34783	ENSMUSG00000050908	Tvp23a	2.32683	ENSMUSG00000045629	Sh3tc2	2.57025	ENSMUSG00000094955	Gm3699	14.6053
ENSMUSG00000036672	Cenpt	2.37802	ENSMUSG00000050936	Gm42743	4.04764	ENSMUSG00000045665	Mfsd5	2.19534	ENSMUSG00000094974	Rps19-ps2	5.29365
ENSMUSG00000036676	Tmtc3	2.4186	ENSMUSG00000050953	Gja1	8.76321	ENSMUSG00000045679	Pqlc3	3.75888	ENSMUSG00000094989	Rpl9-ps4	15.0667
ENSMUSG00000036678	Aaas	2.7601	ENSMUSG00000051065	Mb21d2	5.48401	ENSMUSG00000045730	Adrb2	3.26767	ENSMUSG00000095186	Gm10718	238.8
ENSMUSG00000036731	Cysrt1	4.84746	ENSMUSG00000051220	Ercc6l	7.26316	ENSMUSG00000045751	Mms22l	3.03548	ENSMUSG00000095217	Hist1h2bn	7.43077
ENSMUSG00000036768	Kif15	6.55388	ENSMUSG00000051223	Bzw1	2.01816	ENSMUSG00000046179	E2f8	7.27419	ENSMUSG00000095241	Gm5478	18.7273
ENSMUSG00000036777	Anln	10.8099	ENSMUSG00000051225	Fam83a	2.92053	ENSMUSG00000046186	Cd109	4.36489	ENSMUSG00000095280	Gm21738	108.407
ENSMUSG00000036781	Rps27l	2.11306	ENSMUSG00000051234	Rnf7	2.13673	ENSMUSG00000046203	Sprr2g	11.475	ENSMUSG00000095288	Gm7618	12.5556
ENSMUSG00000036825	Ssx2ip	3.33876	ENSMUSG00000051235	Gen1	2.6621	ENSMUSG00000046337	Fam178b	8.3	ENSMUSG00000095526	Gm10243	9.78462
ENSMUSG00000036856	Wnt4	3.28923	ENSMUSG00000051341	Zfp52	2.54839	ENSMUSG00000046352	Gjb2	4.60448	ENSMUSG00000095547	Gm10719	163.75
ENSMUSG00000036875	Dna2	6.18421	ENSMUSG00000051378	Kif18b	13.186	ENSMUSG00000046402	Rbp1	12.0153	ENSMUSG00000095590	Gm24305	26.15
ENSMUSG00000036902	Neto2	3.79114	ENSMUSG00000051391	Ywhag	2.06059	ENSMUSG00000046410	Kcnk6	2.90076	ENSMUSG00000095615	Gm26243	8.36232
ENSMUSG00000036964	Trim17	2.28386	ENSMUSG00000051517	Arhgef39	2.90526	ENSMUSG00000046546	Fam43a	26.8451	ENSMUSG00000095676	Gm25099	6.27966
ENSMUSG00000037020	Wdr62	4.53846	ENSMUSG00000051627	Hist1h1e	2.56689	ENSMUSG00000046591	Ticrr	5.00778	ENSMUSG00000095738	Gm25313	12.2584
ENSMUSG00000037060	Prkcdbp	4.56083	ENSMUSG00000052353	Cemip	135.161	ENSMUSG00000046598	Bdh1	6.22108	ENSMUSG00000095742	CAAA01147332.1	2.58207
ENSMUSG00000037070	Rbmxl1	2.21662	ENSMUSG00000052419	2610001J05Rik	2.37548	ENSMUSG00000046623	Gjb4	4.17544	ENSMUSG00000095891	Gm10717	231.75
ENSMUSG00000037129	Tmprss13	2.18336	ENSMUSG00000052565	Hist1h1d	4.62004	ENSMUSG00000046711	Hmga1	2.71805	ENSMUSG00000095892	Rnu5g	9.87611
ENSMUSG00000037152	Ndufc1	2.74128	ENSMUSG00000052997	Uba2	2.68237	ENSMUSG00000046908	Ltb4r1	3	ENSMUSG00000096037	n-R5s136	59
ENSMUSG00000037188	Grhl3	2.58438	ENSMUSG00000053007	9430076C15Rik	3.63572	ENSMUSG00000047246	Hist1h2be	2.70384	ENSMUSG00000096201	Gm10715	150.492
ENSMUSG00000037278	Tmem97	4.91791	ENSMUSG00000053025	Sv2b	41.3889	ENSMUSG00000047250	Ptgs1	3.41521	ENSMUSG00000096243	Gm24265	9.75769
ENSMUSG00000037313	Tacc3	6.78409	ENSMUSG00000053128	Rnf26	2.29625	ENSMUSG00000047261	Gap43	43.7698	ENSMUSG00000096263	Snord14c	2.70912
ENSMUSG00000037361	Sf3b6	2.42569	ENSMUSG00000053338	Tarm1	1240	ENSMUSG00000047281	Sfn	3.43258	ENSMUSG00000096349	Gm22513	9.60419
ENSMUSG00000037376	Trmt6	2.61111	ENSMUSG00000053398	Phgdh	3.95203	ENSMUSG00000047414	Flrt2	4.06837	ENSMUSG00000096385	Gm11168	97.9286
ENSMUSG00000037379	Spon2	3.17054	ENSMUSG00000053522	Lgals7	3.40438	ENSMUSG00000047434	Xxylt1	2.03026	ENSMUSG00000096681	Rps19-ps1	5.29365
ENSMUSG00000037466	4930427A07Rik	2.27304	ENSMUSG00000053626	Tll1	25.0563	ENSMUSG00000047446	Arl4a	2.7771	ENSMUSG00000096684	Gm25989	10.2895
ENSMUSG00000037474	Dtl	4.56631	ENSMUSG00000053654	Krt42	3.8777	ENSMUSG00000047501	Cldn4	3.46355	ENSMUSG00000096736	Gm17535	303.4
ENSMUSG00000037572	Wdhd1	5.17429	ENSMUSG00000053675	Tgm5	5.97872	ENSMUSG00000047517	Dmbt1	1600	ENSMUSG00000096842	Gm10736	8.41702
ENSMUSG00000037577	Ephx3	8.07955	ENSMUSG00000053716	Dusp7	2.11971	ENSMUSG00000047534	Mis18bp1	3.48276	ENSMUSG00000096942	Rps19-ps6	4.71611
ENSMUSG00000037601	Nme1	4.06933	ENSMUSG00000053797	Krt16	53.8166	ENSMUSG00000047586	Nccrp1	10.4179	ENSMUSG00000097157	Gm26512	5.83491
ENSMUSG00000037613	Tnfrsf23	3.1749	ENSMUSG00000053801	Grwd1	2.29803	ENSMUSG00000047613	A430005L14Rik	2.40379	ENSMUSG00000097312	Gm26870	196
ENSMUSG00000037628	Cdkn3	7.4	ENSMUSG00000054065	Pkp3	2.71145	ENSMUSG00000047648	Fbxo30	2.4152	ENSMUSG00000097564	C430014B12Rik	5.04545
ENSMUSG00000037679	Inf2	2.03047	ENSMUSG00000054717	Hmgb2	2.52484	ENSMUSG00000047757	Fancb	2.14085	ENSMUSG00000097656	Gm26712	2.92308
ENSMUSG00000037725	Ckap2	5.44811	ENSMUSG00000054889	Dsp	3.0369	ENSMUSG00000047832	Cdca4	2.42278	ENSMUSG00000097722	Gm26841	2.11965
ENSMUSG00000037892	Pcdh18	4.66787	ENSMUSG00000054905	Stfa3	3.3142	ENSMUSG00000048007	Timm8a1	2.70115	ENSMUSG00000097769	Snhg4	5.13782
ENSMUSG00000037894	H2afz	3.2233	ENSMUSG00000055254	Ntrk2	2.71474	ENSMUSG00000048078	Tenm4	4.47079	ENSMUSG00000097906	Gm9625	2.67391
ENSMUSG00000037902	Sirpa	2.21043	ENSMUSG00000055368	Slc6a2	20.775	ENSMUSG00000048087	Gm4737	3.41129	ENSMUSG00000097928	Gm26578	8.98349
ENSMUSG00000037936	Scarb1	2.8285	ENSMUSG00000055407	Map6	3.69523	ENSMUSG00000048142	Nat8l	5.94318	ENSMUSG00000098178	Gm42418	5.58409
ENSMUSG00000037972	Snn	2.90062	ENSMUSG00000055435	Maf	2.553	ENSMUSG00000048251	Bcl11b	2.05564	ENSMUSG00000098192	Gm3534	6.83333
ENSMUSG00000037995	Igsf9	4.21603	ENSMUSG00000055561	Spink5	2.86691	ENSMUSG00000048327	Ckap2l	3.03293	ENSMUSG00000098343	Mir6240	7.87179
ENSMUSG00000038037	Socs1	3.46043	ENSMUSG00000055653	Gpc3	2.86778	ENSMUSG00000048399	Tprg	11.3944	ENSMUSG00000098798	Gm27288	4.11957
ENSMUSG00000038168	P3h2	2.97156	ENSMUSG00000056201	Cfl1	2.57127	ENSMUSG00000048402	Gli2	2.11373	ENSMUSG00000098973	Mir6236	5.4805
ENSMUSG00000038172	Ttc39b	2.42139	ENSMUSG00000056214	Pard6g	2.32592	ENSMUSG00000048458	Fam212b	2.78723	ENSMUSG00000099021	Rn7s1	30.9113
ENSMUSG00000038279	Nop2	2.20785	ENSMUSG00000056220	Pla2g4a	3.77632	ENSMUSG00000048709	Gm8666	2.86667	ENSMUSG00000099250	Rn7s2	19.5466
ENSMUSG00000038352	Arl5c	13.5763	ENSMUSG00000056305	Usp39	2.02444	ENSMUSG00000048764	Tmprss11f	26.0357	ENSMUSG00000099471	Gm8451	3.86864
ENSMUSG00000038354	Ankrd35	4.47883	ENSMUSG00000056394	Lig1	2.45999	ENSMUSG00000048922	Cdca2	3.23052	ENSMUSG00000099583	Hist1h3d	9.0303
ENSMUSG00000038375	Trp53inp2	9.05508	ENSMUSG00000056612	Ppp1r14b	2.58968	ENSMUSG00000049036	Tmem121	7.58824	ENSMUSG00000099587	Gm28967	5.09792
ENSMUSG00000038379	Ttk	10.0551	ENSMUSG00000056632	Dsg3	5.42326	ENSMUSG00000049044	Rapgef4	2.21321	ENSMUSG00000099764	Rps10-ps2	6.3578
ENSMUSG00000038400	Pmepa1	2.68244	ENSMUSG00000056737	Capg	3.1408	ENSMUSG00000049112	Oxtr	14.7322	ENSMUSG00000099937	Gm28872	5.62264
ENSMUSG00000038412	Higd1a	5.87786	ENSMUSG00000057262	Gm10020	17	ENSMUSG00000049327	Kmt5a	2.74776	ENSMUSG00000100078	Gm6170	2.85714
ENSMUSG00000038482	Tfdp1	2.64792	ENSMUSG00000057454	Lypd3	10.3953	ENSMUSG00000049539	Hist1h1a	5.63109	ENSMUSG00000100259	Gm29236	3.78085
ENSMUSG00000038510	Rpf2	2.40226	ENSMUSG00000057497	Fam136a	2.3125	ENSMUSG00000049565	Aknad1	11.0896	ENSMUSG00000100755	Rps23-ps1	4.1875
ENSMUSG00000038539	Atf5	2	ENSMUSG00000057666	Gapdh	2.70018	ENSMUSG00000049598	Vsig8	2.27835	ENSMUSG00000100865	Gm9320	6.8
ENSMUSG00000038602	Slc35f1	8.05556	ENSMUSG00000057933	Gsta2	8.20611	ENSMUSG00000049699	Ucn2	3	ENSMUSG00000100992	Gm23925	12.4407
ENSMUSG00000038722	Bud31	2.06897	ENSMUSG00000057948	Unc13d	2.85507	ENSMUSG00000049721	Gal3st1	6.73585	ENSMUSG00000101111	Gm28437	5.57778
ENSMUSG00000038930	Rccd1	2.506	ENSMUSG00000058022	Adtrp	5.04348	ENSMUSG00000049881	2810025M15Rik	3.31405	ENSMUSG00000101188	Eif4a-ps4	3.25806
ENSMUSG00000038943	Prc1	6.06213	ENSMUSG00000058056	Palld	2.7367	ENSMUSG00000049932	H2afx	5.19276	ENSMUSG00000101249	Gm29216	2.90541
ENSMUSG00000039016	Timm8b	2.46259	ENSMUSG00000058258	Idi1	3.87456	ENSMUSG00000050107	Gsg2	6.16071	ENSMUSG00000101304	Plet1os	4.15909
ENSMUSG00000039041	Adrm1	2.12193	ENSMUSG00000058290	Espl1	5.89552	ENSMUSG00000050108	Bpifc	24.0278	ENSMUSG00000101355	Hist1h3h	7.17978
ENSMUSG00000039055	Eme1	2.77839	ENSMUSG00000058354	Krt6a	39.141	ENSMUSG00000050359	Sprr1a	3.96546	ENSMUSG00000102135	Gm37108	5.87234
ENSMUSG00000039067	Psmd7	2.45549	ENSMUSG00000058385	Hist1h2bg	4.11758	ENSMUSG00000050410	Tcf19	2.46953	ENSMUSG00000102299	Gm37539	2.25
ENSMUSG00000039187	Fanci	2.0402	ENSMUSG00000058773	Hist1h1b	7.20059	ENSMUSG00000050558	Prokr2	592.903	ENSMUSG00000102606	Rpl21-ps1	3.25517
ENSMUSG00000039197	Adk	2.14053	ENSMUSG00000059040	Eno1b	3.91316	ENSMUSG00000050635	Sprr2f	5.94697	ENSMUSG00000103034	Gm8797	6.19101
ENSMUSG00000039217	Il18	11.2353	ENSMUSG00000059195	Gm12715	2.14805	ENSMUSG00000050860	Phospho1	3.11864	ENSMUSG00000103434	Gm36993	12.8651
ENSMUSG00000039239	Tgfb2	2.10295	ENSMUSG00000059674	Cdh24	3.14815	ENSMUSG00000050936	Gm42743	3.24953	ENSMUSG00000103653	Gstp-ps	2.97917
ENSMUSG00000039323	Igfbp2	70.9325	ENSMUSG00000059743	Fdps	3.39898	ENSMUSG00000050953	Gja1	8.07817	ENSMUSG00000104599	AC154540.1	7.97403
ENSMUSG00000039372	March4	6.51667	ENSMUSG00000059751	Rps3a3	17.288	ENSMUSG00000051065	Mb21d2	6.67591	ENSMUSG00000104623	Gm6394	5.90411
ENSMUSG00000039395	Mreg	2.87432	ENSMUSG00000059791	Nrm	3.5642	ENSMUSG00000051220	Ercc6l	7.64912	ENSMUSG00000104649	Gm43712	3.91589
ENSMUSG00000039405	Prss23	5.11111	ENSMUSG00000059824	Dbp	2.85714	ENSMUSG00000051223	Bzw1	2.0141	ENSMUSG00000104653	Gm43109	3.82857
ENSMUSG00000039497	Dse	2.42791	ENSMUSG00000059895	Ptp4a3	2.37271	ENSMUSG00000051234	Rnf7	2.16939	ENSMUSG00000104690	AC156953.1	9.25057
ENSMUSG00000039628	Hs3st6	3.94444	ENSMUSG00000059898	Dsc3	4.43249	ENSMUSG00000051235	Gen1	2.27854	ENSMUSG00000104740	Mir6516	11.0808
ENSMUSG00000039748	Exo1	6.44079	ENSMUSG00000060093	Hist1h4a	4.32233	ENSMUSG00000051341	Zfp52	4.54032	ENSMUSG00000104771	Gm44394	9.21429
ENSMUSG00000039771	Polr2j	2.22742	ENSMUSG00000060371	Caln1	6.10667	ENSMUSG00000051378	Kif18b	10.314	ENSMUSG00000104863	AC121821.1	8.42703
ENSMUSG00000039842	Mcph1	2.055	ENSMUSG00000060402	Chst8	15.0784	ENSMUSG00000051431	Gpr87	2.63236	ENSMUSG00000104997	Gm44350	7.93443
ENSMUSG00000039887	Alg14	2.45222	ENSMUSG00000060487	Samd5	3.61151	ENSMUSG00000051627	Hist1h1e	2.04	ENSMUSG00000105014	Gm44367	12.5
ENSMUSG00000039987	Phtf2	2.49741	ENSMUSG00000060639	Hist1h4i	3.81884	ENSMUSG00000051650	B3gnt2	2.06624	ENSMUSG00000105031	Gm3511	3.4058
ENSMUSG00000039994	Timeless	4.56522	ENSMUSG00000060671	Atp8b2	2.01376	ENSMUSG00000051855	Mest	2.23667	ENSMUSG00000105109	Gm44297	7.20635
ENSMUSG00000040010	Slc7a5	8.10773	ENSMUSG00000060950	Trmt61a	2.76238	ENSMUSG00000052135	Foxo6	2.99254	ENSMUSG00000105145	AC157822.1	19.1827
ENSMUSG00000040034	Nup43	2.5081	ENSMUSG00000060962	Dmkn	5.03621	ENSMUSG00000052353	Cemip	77.0968	ENSMUSG00000105212	Gm43557	9.97753
ENSMUSG00000040055	Gjb6	25.7273	ENSMUSG00000060969	Irx1	4.86885	ENSMUSG00000052419	2610001J05Rik	2.14734	ENSMUSG00000105232	AC124457.1	4.29167
ENSMUSG00000040078	Gm9769	2.41578	ENSMUSG00000061119	Prcp	4.41734	ENSMUSG00000052565	Hist1h1d	3.54388	ENSMUSG00000105344	Gm43556	7.88235
ENSMUSG00000040084	Bub1b	10.553	ENSMUSG00000061126	Cyp4f39	4.41341	ENSMUSG00000052997	Uba2	2.7122	ENSMUSG00000105361	AY036118	6.06598
ENSMUSG00000040204	2810417H13Rik	12.7474	ENSMUSG00000061458	Nol10	2.04414	ENSMUSG00000053007	9430076C15Rik	3.90295	ENSMUSG00000105388	Rpl36a-ps2	4.46078
ENSMUSG00000040205	Cuzd1	70.9804	ENSMUSG00000061527	Krt5	4.64403	ENSMUSG00000053025	Sv2b	61.6667	ENSMUSG00000105398	AC157822.2	22.0802
ENSMUSG00000040212	Emp3	2.31034	ENSMUSG00000061615	Hist1h2ab	6.65823	ENSMUSG00000053338	Tarm1	1725	ENSMUSG00000105399	Mir1843b	5.96373
ENSMUSG00000040254	Sema3d	2.55792	ENSMUSG00000061759	Armt1	2.11329	ENSMUSG00000053398	Phgdh	2.9345	ENSMUSG00000105415	Gm44364	7.01064
ENSMUSG00000040354	Mars	2.16535	ENSMUSG00000061928	Dsg1b	145.339	ENSMUSG00000053442	4930597O21Rik	2.50916	ENSMUSG00000105518	Gm42674	13.9139
ENSMUSG00000040432	Ltb4r2	2.59259	ENSMUSG00000061991	Hist1h2af	4.59002	ENSMUSG00000053522	Lgals7	2.80351	ENSMUSG00000105580	Gm44454	5.74286
ENSMUSG00000040548	Tex2	3.51075	ENSMUSG00000062070	Pgk1	3.16145	ENSMUSG00000053613	Notumos	46.2745	ENSMUSG00000105617	Gm43809	2.51983
ENSMUSG00000040653	Ppp1r14c	2.83831	ENSMUSG00000062248	Cks2	5.12	ENSMUSG00000053626	Tll1	20.8028	ENSMUSG00000105743	Mir1949	11.6832
ENSMUSG00000040658	Dnph1	4.368	ENSMUSG00000062480	Acat3	2.05032	ENSMUSG00000053654	Krt42	2.71223	ENSMUSG00000105788	AC099934.1	29.1757
ENSMUSG00000040675	Mthfd1l	5.07062	ENSMUSG00000062510	Nsl1	4.76042	ENSMUSG00000053675	Tgm5	4.46809	ENSMUSG00000105790	AC122546.1	63.3636
ENSMUSG00000040681	Hmgn1	2.84833	ENSMUSG00000062554	Gm12751	3.03774	ENSMUSG00000053706	B430305J03Rik	2.55032	ENSMUSG00000105873	Gm43708	11.48
ENSMUSG00000040703	Cyp2s1	2.24907	ENSMUSG00000062611	Rps3a2	4.4837	ENSMUSG00000053716	Dusp7	2.78999	ENSMUSG00000105879	Gm6204	14.0526
ENSMUSG00000040808	S100g	10.5349	ENSMUSG00000062661	Ncs1	2.464	ENSMUSG00000053797	Krt16	33.9421	ENSMUSG00000105899	Gm44383	4290
ENSMUSG00000040824	Snrpd2	2.24781	ENSMUSG00000062727	Hist1h2bk	5.19737	ENSMUSG00000053801	Grwd1	2.09531	ENSMUSG00000105911	Snora16a	4.57068
ENSMUSG00000041064	Pif1	6.65854	ENSMUSG00000062825	Actg1	2.02401	ENSMUSG00000054065	Pkp3	2.42289	ENSMUSG00000105924	Gm44359	10
ENSMUSG00000041084	Ostc	2.88038	ENSMUSG00000062933	Gm10123	2.41395	ENSMUSG00000054342	Kcnn4	3.80738	ENSMUSG00000105972	Mir1843a	7.85714
ENSMUSG00000041219	Arhgap11a	4.02505	ENSMUSG00000063021	Hist1h2ak	5.2732	ENSMUSG00000054537	Tmprss11e	7.57426	ENSMUSG00000106037	Gm4332	3.53302
ENSMUSG00000041220	Elovl6	5.18177	ENSMUSG00000063171	Rps4l	3.56863	ENSMUSG00000054717	Hmgb2	2.55612	ENSMUSG00000106088	Gm44342	59.9474
ENSMUSG00000041287	Sox15	2.13971	ENSMUSG00000063229	Ldha	3.46496	ENSMUSG00000054720	Lrrc8c	3.4426	ENSMUSG00000106106	Rn18s-rs5	5.65165
ENSMUSG00000041313	Slc7a1	2.69088	ENSMUSG00000063430	Wscd2	19.1739	ENSMUSG00000054871	Tmem158	2	ENSMUSG00000106203	Gm44484	12.65
ENSMUSG00000041355	Ssr2	2.17624	ENSMUSG00000063524	Eno1	3.30253	ENSMUSG00000054889	Dsp	2.3897	ENSMUSG00000106221	AL626808.1	66.4681
ENSMUSG00000041431	Ccnb1	18.95	ENSMUSG00000063646	Jakmip1	4.51534	ENSMUSG00000055254	Ntrk2	2.4984	ENSMUSG00000106258	Rpl7a-ps7	8.2973
ENSMUSG00000041438	Cirh1a	2.18319	ENSMUSG00000063694	Cycs	2.11336	ENSMUSG00000055368	Slc6a2	74.1	ENSMUSG00000106279	AC099934.2	30.6105
ENSMUSG00000041498	Kif14	6.96175	ENSMUSG00000063856	Gpx1	2.49492	ENSMUSG00000055407	Map6	3.43167	ENSMUSG00000106297	AC117240.1	147.143
ENSMUSG00000041782	Lad1	2.47209	ENSMUSG00000064032	Gm10143	4.01931	ENSMUSG00000055866	Per2	2.18404	ENSMUSG00000106432	Gm43259	2.92308
ENSMUSG00000041840	Haus1	2.85523	ENSMUSG00000064147	Rab44	6.66667	ENSMUSG00000056201	Cfl1	2.45938	ENSMUSG00000106463	Mir1291	12.8222
ENSMUSG00000041859	Mcm3	5.242	ENSMUSG00000064168	Hist1h2bh	7.29958	ENSMUSG00000056214	Pard6g	2.42716	ENSMUSG00000106596	Gm42822	5.0566
ENSMUSG00000041895	Wipi1	2.53604	ENSMUSG00000064193	Gm4735	3.8119	ENSMUSG00000056220	Pla2g4a	3.46773	ENSMUSG00000106618	AC145392.1	92.9268
ENSMUSG00000041920	Slc16a6	9.07524	ENSMUSG00000064232	Gm5414	8.70738	ENSMUSG00000056394	Lig1	2.83562	ENSMUSG00000106649	AC154296.1	4.64013
ENSMUSG00000041939	Mvk	3.54617	ENSMUSG00000064254	Ethe1	2.89305	ENSMUSG00000056612	Ppp1r14b	2.38325	ENSMUSG00000106926	Rpl7-ps7	3.67949
ENSMUSG00000041959	S100a10	2.22222	ENSMUSG00000064288	Hist1h4k	3.58745	ENSMUSG00000056632	Dsg3	5.07836	ENSMUSG00000106943	Dancr	5.36923
ENSMUSG00000042029	Ncapg2	4.71361	ENSMUSG00000064797	Gm24357	4.94198	ENSMUSG00000056737	Capg	3.19042	ENSMUSG00000107176	Gm9794	2.8524
ENSMUSG00000042035	Igsf3	2.30507	ENSMUSG00000065265	Gm23455	4.24318	ENSMUSG00000057454	Lypd3	9.67368	ENSMUSG00000107350	Gm42532	18.4472
ENSMUSG00000042165	Gm9774	2.23958	ENSMUSG00000065663	Gm22579	2.50769	ENSMUSG00000057469	E2f6	2.08912	ENSMUSG00000107412	Gm20383	7.16667
ENSMUSG00000042225	Ammecr1	2.76138	ENSMUSG00000066060	Gm12866	10.2083	ENSMUSG00000057497	Fam136a	2.20703	ENSMUSG00000107722	2900060B14Rik	6.6875
ENSMUSG00000042251	Pm20d1	5.11111	ENSMUSG00000066979	Bub3	2.04217	ENSMUSG00000057666	Gapdh	2.55597	ENSMUSG00000107951	Gm6210	6.13208
ENSMUSG00000042286	Stab1	13.7125	ENSMUSG00000067006	Serpinb5	6.3279	ENSMUSG00000057933	Gsta2	7.92366	ENSMUSG00000108437	Gm19366	4.57447
ENSMUSG00000042306	S100a14	3.46956	ENSMUSG00000067367	Lyar	2.26154	ENSMUSG00000057948	Unc13d	2	ENSMUSG00000108443	Gm44510	6.64901
ENSMUSG00000042357	Gjb5	5.06475	ENSMUSG00000067389	Gm17080	3.33987	ENSMUSG00000058022	Adtrp	4.6087	ENSMUSG00000108452	4930413G21Rik	2.85217
ENSMUSG00000042462	Dctpp1	2.92019	ENSMUSG00000067455	Hist1h4j	3.20853	ENSMUSG00000058056	Palld	2.12984	ENSMUSG00000108478	Gm19514	33.1111
ENSMUSG00000042489	Clspn	7.26744	ENSMUSG00000067547	Gm7666	2.26636	ENSMUSG00000058258	Idi1	2.68021	ENSMUSG00000109224	RP24-63G4.14	2.69048
ENSMUSG00000042688	Mapk6	2.35431	ENSMUSG00000067714	Lpar5	2.51673	ENSMUSG00000058290	Espl1	4.06343	ENSMUSG00000109509	Rps12-ps4	10.0816
ENSMUSG00000042734	Ttc9	3.01887	ENSMUSG00000067780	Pi15	16.2115	ENSMUSG00000058354	Krt6a	28.6335	ENSMUSG00000109625	3110080E11Rik	12.1905
ENSMUSG00000042962	Gm5436	10.2381	ENSMUSG00000068039	Tcp1	2.26655	ENSMUSG00000058385	Hist1h2bg	3.56327	ENSMUSG00000110275	Gm5905	5.03226
ENSMUSG00000042988	Notum	43.0833	ENSMUSG00000068101	Cenpm	6.82432	ENSMUSG00000058454	Dhcr7	2.12301	ENSMUSG00000110841	RP23-269H21.1	7.43363
ENSMUSG00000043067	Dpy19l1	2.39014	ENSMUSG00000068566	Myadm	4.32123	ENSMUSG00000058704	Memo1	2.00598	ENSMUSG00000111082	RP23-23P9.5	3.27517
ENSMUSG00000043068	Fam89a	2.80682	ENSMUSG00000068744	Psrc1	2.80392	ENSMUSG00000058773	Hist1h1b	5.61947	ENSMUSG00000111356	RP23-288C18.3	10.7674
ENSMUSG00000043091	Tuba1c	2.42384	ENSMUSG00000068855	Hist2h2ac	2.30088	ENSMUSG00000059040	Eno1b	3.30263	ENSMUSG00000111602	RP24-250L13.2	18.1739
ENSMUSG00000043165	Lor	10.3871	ENSMUSG00000069255	Dusp22	3.62864	ENSMUSG00000059195	Gm12715	2.42338	ENSMUSG00000111796	RP24-294A16.4	22.8652
ENSMUSG00000043424	Eif3j2	2.35786	ENSMUSG00000069265	Hist1h3a	3.57532	ENSMUSG00000059327	Eda	2.80385
ENSMUSG00000043430	Psapl1	3.48327	ENSMUSG00000069266	Hist1h4b	3.77795	ENSMUSG00000059668	Krt4	5.58598
ENSMUSG00000043439	E130012A19Rik	2.89209	ENSMUSG00000069267	Hist1h3b	5.00136	ENSMUSG00000059674	Cdh24	2.92593
ENSMUSG00000043557	Mdga1	21.9091	ENSMUSG00000069268	Hist1h2bf	5.73276	ENSMUSG00000059743	Fdps	2.41432
ENSMUSG00000043639	Rbm20	8.10938	ENSMUSG00000069270	Hist1h2ac	4.39756	ENSMUSG00000059791	Nrm	3.59144
ENSMUSG00000043681	Fam25c	22.2045	ENSMUSG00000069272	Hist1h2ae	6.58611	ENSMUSG00000059824	Dbp	10.7589
ENSMUSG00000044005	Gls2	13.5714	ENSMUSG00000069273	Hist1h3e	3.26428	ENSMUSG00000059898	Dsc3	2.93594
ENSMUSG00000044041	Krt13	15.1561	ENSMUSG00000069274	Hist1h4f	3.51394	ENSMUSG00000060093	Hist1h4a	3.32816
ENSMUSG00000044155	Lsm8	2.05627	ENSMUSG00000069300	Hist1h2bj	6.32976	ENSMUSG00000060147	Serpinb6a	2.32201
ENSMUSG00000044201	Cdc25c	9.56364	ENSMUSG00000069301	Hist1h2ag	5.29054	ENSMUSG00000060371	Caln1	5.9
ENSMUSG00000044313	Mab21l3	2.34259	ENSMUSG00000069302	Hist1h2ah	7.83333	ENSMUSG00000060402	Chst8	27.5686
ENSMUSG00000044322	Dsc1	13.2667	ENSMUSG00000069305	Hist1h4n	2.37939	ENSMUSG00000060487	Samd5	2.56835
ENSMUSG00000044337	Ackr3	2.54756	ENSMUSG00000069308	Hist1h2bp	5.93478	ENSMUSG00000060639	Hist1h4i	2.46377
ENSMUSG00000044820	AY074887	2.14851	ENSMUSG00000069309	Hist1h2an	5.92466	ENSMUSG00000060950	Trmt61a	2.23102
ENSMUSG00000044894	Uqcrq	2.80197	ENSMUSG00000069310	Hist1h3c	5.79878	ENSMUSG00000060969	Irx1	7.44672
ENSMUSG00000044912	Syt16	13.0094	ENSMUSG00000069441	Dsg1a	22.7466	ENSMUSG00000061119	Prcp	2.51762
ENSMUSG00000045005	Fzd5	2.55079	ENSMUSG00000069793	Slfn9	2.39045	ENSMUSG00000061126	Cyp4f39	4.65922
ENSMUSG00000045273	Cenph	5.97938	ENSMUSG00000069808	Fam57a	4.0554	ENSMUSG00000061360	Phf5a	2.02492
ENSMUSG00000045328	Cenpe	5.9902	ENSMUSG00000069910	Spdl1	3.73418	ENSMUSG00000061527	Krt5	3.69365
ENSMUSG00000045349	Sh2d5	31.5	ENSMUSG00000070436	Serpinh1	3.57234	ENSMUSG00000061559	Wdr61	2.25893
ENSMUSG00000045545	Krt14	5.35681	ENSMUSG00000070687	Htr1d	10.0606	ENSMUSG00000061613	U2af1	2.04246
ENSMUSG00000045629	Sh3tc2	4.02479	ENSMUSG00000071014	Ndufb6	2.23923	ENSMUSG00000061615	Hist1h2ab	5.20253
ENSMUSG00000045665	Mfsd5	2.10655	ENSMUSG00000071478	Hist1h2ad	5.33333	ENSMUSG00000061928	Dsg1b	76.1322
ENSMUSG00000045679	Pqlc3	3.88452	ENSMUSG00000071516	Hist1h2ai	5.39267	ENSMUSG00000061991	Hist1h2af	4.55531
ENSMUSG00000045751	Mms22l	3.06774	ENSMUSG00000071537	Klrg2	5.80507	ENSMUSG00000062070	Pgk1	3.10421
ENSMUSG00000046056	Sbsn	2.66354	ENSMUSG00000071547	Nt5dc2	22.3571	ENSMUSG00000062248	Cks2	4.72889
ENSMUSG00000046179	E2f8	8.01613	ENSMUSG00000071561	BC100530	6.4656	ENSMUSG00000062345	Serpinb2	2.6201
ENSMUSG00000046186	Cd109	4.24267	ENSMUSG00000071604	Fam189a2	6.659	ENSMUSG00000062480	Acat3	2.01872
ENSMUSG00000046203	Sprr2g	19.1375	ENSMUSG00000071653	1810009A15Rik	2.50733	ENSMUSG00000062510	Nsl1	4.1875
ENSMUSG00000046337	Fam178b	7.76667	ENSMUSG00000071858	Gm94	8.7476	ENSMUSG00000062554	Gm12751	3.65094
ENSMUSG00000046352	Gjb2	7.47761	ENSMUSG00000071866	Ppia	2.41854	ENSMUSG00000062661	Ncs1	2.31543
ENSMUSG00000046402	Rbp1	14.3214	ENSMUSG00000072082	Ccnf	6.225	ENSMUSG00000062727	Hist1h2bk	4.4386
ENSMUSG00000046410	Kcnk6	4.01145	ENSMUSG00000072845	Tmprss11a	24.1359	ENSMUSG00000062825	Actg1	2.10256
ENSMUSG00000046546	Fam43a	34.9674	ENSMUSG00000073676	Hspe1	2.39657	ENSMUSG00000062933	Gm10123	2.43953
ENSMUSG00000046580	Gm7862	2.15541	ENSMUSG00000073705	Apitd1	3.93382	ENSMUSG00000063021	Hist1h2ak	4.99828
ENSMUSG00000046591	Ticrr	5.23735	ENSMUSG00000073910	Mob3b	2.10328	ENSMUSG00000063171	Rps4l	3.28627
ENSMUSG00000046598	Bdh1	6.93059	ENSMUSG00000074199	Krtdap	4.51771	ENSMUSG00000063229	Ldha	3.13517
ENSMUSG00000046623	Gjb4	3.48246	ENSMUSG00000074259	Gramd2	4.03051	ENSMUSG00000063406	Tmed5	2.08568
ENSMUSG00000046687	Gm5424	4.32143	ENSMUSG00000074364	Ehd2	5.19131	ENSMUSG00000063430	Wscd2	29.8696
ENSMUSG00000046711	Hmga1	2.66729	ENSMUSG00000074403	Hist2h3b	2.57763	ENSMUSG00000063524	Eno1	2.62759
ENSMUSG00000046808	Atp10d	2.19831	ENSMUSG00000074445	Sprr2a3	4.88785	ENSMUSG00000063646	Jakmip1	4.6319
ENSMUSG00000046865	Fbl	2.00054	ENSMUSG00000074457	S100a16	2.6722	ENSMUSG00000063694	Cycs	2.13866
ENSMUSG00000046908	Ltb4r1	3.25899	ENSMUSG00000074476	Spc24	5.29915	ENSMUSG00000063856	Gpx1	3.41222
ENSMUSG00000047246	Hist1h2be	3.34449	ENSMUSG00000074577	Fam65c	2.74312	ENSMUSG00000064032	Gm10143	4.80901
ENSMUSG00000047250	Ptgs1	3.37616	ENSMUSG00000074622	Mafb	6.30303	ENSMUSG00000064080	Fbln2	3.37476
ENSMUSG00000047261	Gap43	53.1403	ENSMUSG00000074647	Fam83c	3.27015	ENSMUSG00000064147	Rab44	6.54545
ENSMUSG00000047281	Sfn	3.7649	ENSMUSG00000074802	Gas2l3	3.59547	ENSMUSG00000064168	Hist1h2bh	6.37553
ENSMUSG00000047414	Flrt2	4.75357	ENSMUSG00000075029	4930558J22Rik	3.85647	ENSMUSG00000064193	Gm4735	3.05952
ENSMUSG00000047434	Xxylt1	2.08289	ENSMUSG00000075031	Hist1h2bb	5.62379	ENSMUSG00000064232	Gm5414	5.88041
ENSMUSG00000047443	Fam132b	2.82143	ENSMUSG00000075229	Ccdc58	2.02525	ENSMUSG00000064254	Ethe1	3.19786
ENSMUSG00000047446	Arl4a	2.08998	ENSMUSG00000075232	Amd1	2.11943	ENSMUSG00000064288	Hist1h4k	3.20152
ENSMUSG00000047459	Dynlrb1	2.14095	ENSMUSG00000075266	Cenpw	4.78261	ENSMUSG00000064325	Hhip	44.902
ENSMUSG00000047534	Mis18bp1	4.49425	ENSMUSG00000075402	Krt76	43.8333	ENSMUSG00000064797	Gm24357	2.83049
ENSMUSG00000047586	Nccrp1	2.50746	ENSMUSG00000075528	Aarsd1	2.13678	ENSMUSG00000065265	Gm23455	2.68921
ENSMUSG00000047649	Cd3eap	2.20343	ENSMUSG00000075591	Gm10874	4.66667	ENSMUSG00000065529	Mir22	4.54545
ENSMUSG00000047757	Fancb	2.75352	ENSMUSG00000075602	Ly6a	6.1226	ENSMUSG00000066060	Gm12866	4.875
ENSMUSG00000047832	Cdca4	2.51646	ENSMUSG00000075707	Dio3	7.38462	ENSMUSG00000066278	Vps37b	2.52069
ENSMUSG00000047879	Usp14	2.4284	ENSMUSG00000076142	Mir711	4.32836	ENSMUSG00000066979	Bub3	2.07898
ENSMUSG00000048007	Timm8a1	3.44828	ENSMUSG00000076437	Selenoh	3.39469	ENSMUSG00000067006	Serpinb5	5.35161
ENSMUSG00000048078	Tenm4	3.30056	ENSMUSG00000076441	Ass1	3.78435	ENSMUSG00000067158	Col4a4	2.18237
ENSMUSG00000048087	Gm4737	3.10484	ENSMUSG00000076498	Trbc2	11.0303	ENSMUSG00000067219	Nipal1	6.67598
ENSMUSG00000048142	Nat8l	4.42045	ENSMUSG00000078117	Gm16485	31.3759	ENSMUSG00000067367	Lyar	2.43432
ENSMUSG00000048216	Gpr85	14.6316	ENSMUSG00000078144	Capns2	12.6279	ENSMUSG00000067389	Gm17080	2.33007
ENSMUSG00000048251	Bcl11b	2.29279	ENSMUSG00000078249	Hmga1-rs1	3.30374	ENSMUSG00000067455	Hist1h4j	3.02133
ENSMUSG00000048327	Ckap2l	3.58397	ENSMUSG00000078453	Abracl	2.14286	ENSMUSG00000067608	Pcna-ps2	3.26969
ENSMUSG00000048399	Tprg	13.3778	ENSMUSG00000078486	Perm1	2.02415	ENSMUSG00000067780	Pi15	52.0962
ENSMUSG00000048402	Gli2	2.14902	ENSMUSG00000078630	Tomt	2.90435	ENSMUSG00000068039	Tcp1	2.1047
ENSMUSG00000048455	Sprr1b	147.5	ENSMUSG00000078657	Crnn	10.6667	ENSMUSG00000068101	Cenpm	3.94595
ENSMUSG00000048458	Fam212b	2.48511	ENSMUSG00000078773	Rad54b	3.58788	ENSMUSG00000068122	Agtr2	17.0833
ENSMUSG00000048578	Mlec	2.34521	ENSMUSG00000078812	Eif5a	2.59446	ENSMUSG00000068523	Gng5	2.09564
ENSMUSG00000048699	Krt90	4.31373	ENSMUSG00000078816	Prkcg	3.55769	ENSMUSG00000068566	Myadm	5.02707
ENSMUSG00000048764	Tmprss11f	33	ENSMUSG00000078851	Hist3h2a	2.31901	ENSMUSG00000068749	Psma5	2.39604
ENSMUSG00000048922	Cdca2	4.13636	ENSMUSG00000079225	Gm9531	2.47619	ENSMUSG00000068855	Hist2h2ac	2.22714
ENSMUSG00000048988	Elfn1	7.56522	ENSMUSG00000079451	Tmprss11g	12.5344	ENSMUSG00000069255	Dusp22	3.26622
ENSMUSG00000049091	Sephs2	2.27451	ENSMUSG00000079553	Kifc1	9.70755	ENSMUSG00000069265	Hist1h3a	2.95974
ENSMUSG00000049112	Oxtr	4.63934	ENSMUSG00000079685	Ulbp1	4.42353	ENSMUSG00000069266	Hist1h4b	3.21299
ENSMUSG00000049124	Gm8186	2.51714	ENSMUSG00000080875	Gm7332	3	ENSMUSG00000069267	Hist1h3b	3.63229
ENSMUSG00000049128	Ivl	2.2	ENSMUSG00000080932	Gm10224	6.81818	ENSMUSG00000069268	Hist1h2bf	5.00431
ENSMUSG00000049299	Trappc1	2.15976	ENSMUSG00000080935	Got2-ps1	5.41667	ENSMUSG00000069270	Hist1h2ac	3.38293
ENSMUSG00000049327	Kmt5a	3.09955	ENSMUSG00000081683	Fzd10	3.26499	ENSMUSG00000069272	Hist1h2ae	5.15833
ENSMUSG00000049404	Rarres1	15.1309	ENSMUSG00000082319	Gm8822	3.78338	ENSMUSG00000069273	Hist1h3e	2.9927
ENSMUSG00000049539	Hist1h1a	7.25468	ENSMUSG00000083669	Gm10169	2.52809	ENSMUSG00000069274	Hist1h4f	2.84595
ENSMUSG00000049565	Aknad1	16.9403	ENSMUSG00000084257	Gm11597	89.8889	ENSMUSG00000069300	Hist1h2bj	5.41555
ENSMUSG00000049699	Ucn2	3.17347	ENSMUSG00000084890	A830036E02Rik	12.3226	ENSMUSG00000069301	Hist1h2ag	5.02027
ENSMUSG00000049721	Gal3st1	7.69182	ENSMUSG00000085023	Gm12744	5.28833	ENSMUSG00000069302	Hist1h2ah	6.87255
ENSMUSG00000049751	Rpl36al	2.05272	ENSMUSG00000085314	Gm14866	2.65027	ENSMUSG00000069305	Hist1h4n	2.05921
ENSMUSG00000049881	2810025M15Rik	3.57025	ENSMUSG00000085337	Gm15964	2.13884	ENSMUSG00000069309	Hist1h2an	4.4726
ENSMUSG00000049932	H2afx	6.06598	ENSMUSG00000085505	Gm12868	21.7373	ENSMUSG00000069310	Hist1h3c	4.38923
ENSMUSG00000049960	Mrps16	2.21463	ENSMUSG00000085560	C230038L03Rik	3.612	ENSMUSG00000069441	Dsg1a	10.5984
ENSMUSG00000050107	Gsg2	5.94643	ENSMUSG00000085995	Gm2788	7.64103	ENSMUSG00000069793	Slfn9	2.40751
ENSMUSG00000050108	Bpifc	32.0278	ENSMUSG00000086083	Gm15829	2.65441	ENSMUSG00000069808	Fam57a	4.45409
ENSMUSG00000050359	Sprr1a	7.35444	ENSMUSG00000086389	Gm15998	2.868	ENSMUSG00000069910	Spdl1	3.49367
ENSMUSG00000050558	Prokr2	273.226	ENSMUSG00000086421	Gm14091	3.37143	ENSMUSG00000070436	Serpinh1	2.27196
ENSMUSG00000050635	Sprr2f	26.0038	ENSMUSG00000086645	Gm15743	4.59184	ENSMUSG00000070498	Tmem132b	5.06849
ENSMUSG00000050856	Atp5k	2.00673	ENSMUSG00000086683	Gm12867	9.81944	ENSMUSG00000070639	Lrrc8b	2.50109
ENSMUSG00000050860	Phospho1	3.08616	ENSMUSG00000086754	Gm16098	2.69565	ENSMUSG00000070687	Htr1d	12.8182
ENSMUSG00000050908	Tvp23a	2.17317	ENSMUSG00000087067	Gm11532	2.44751	ENSMUSG00000070868	Skint3	4.39583
ENSMUSG00000050936	Gm42743	3.90708	ENSMUSG00000087221	BC037032	2.02878	ENSMUSG00000071072	Ptges3	2.12955
ENSMUSG00000050953	Gja1	8.89205	ENSMUSG00000087436	Gm16156	2.80064	ENSMUSG00000071478	Hist1h2ad	4.37662
ENSMUSG00000051065	Mb21d2	5.72068	ENSMUSG00000087443	Ppp1r18os	3.46552	ENSMUSG00000071516	Hist1h2ai	4.68063
ENSMUSG00000051159	Cited1	20.7857	ENSMUSG00000087606	Gm16121	2.72477	ENSMUSG00000071537	Klrg2	4.22163
ENSMUSG00000051220	Ercc6l	9.28655	ENSMUSG00000087689	Gm15845	6.65794	ENSMUSG00000071547	Nt5dc2	12.1131
ENSMUSG00000051223	Bzw1	2.76831	ENSMUSG00000087692	Gm11940	6.82706	ENSMUSG00000071604	Fam189a2	4.09579
ENSMUSG00000051225	Fam83a	2.90066	ENSMUSG00000087700	Gm15283	5.21877	ENSMUSG00000071722	Spin4	3.51172
ENSMUSG00000051232	Tmem199	2.10559	ENSMUSG00000088552	Mir1957a	9.71111	ENSMUSG00000071858	Gm94	5.23642
ENSMUSG00000051234	Rnf7	2.52245	ENSMUSG00000089835	Gm7097	4.53226	ENSMUSG00000071866	Ppia	2.29947
ENSMUSG00000051235	Gen1	2.58904	ENSMUSG00000090223	Pcp4	7.58696	ENSMUSG00000072082	Ccnf	4.105
ENSMUSG00000051256	Jagn1	2.1622	ENSMUSG00000090257	Gm4524	3.65009	ENSMUSG00000072845	Tmprss11a	50.0097
ENSMUSG00000051341	Zfp52	6.71129	ENSMUSG00000090356	Teddm3	30.9375	ENSMUSG00000073565	Prr16	5.58333
ENSMUSG00000051378	Kif18b	11.0698	ENSMUSG00000090458	Gm17122	2.77411	ENSMUSG00000073676	Hspe1	2.26501
ENSMUSG00000051431	Gpr87	3.13485	ENSMUSG00000090551	A730015C16Rik	2.27441	ENSMUSG00000073705	Apitd1	3.61765
ENSMUSG00000051517	Arhgef39	2.33684	ENSMUSG00000090860	Gm17134	2.28632	ENSMUSG00000073910	Mob3b	2.7589
ENSMUSG00000051518	Rps19bp1	2.14641	ENSMUSG00000091367	Gm17711	2.48571	ENSMUSG00000074259	Gramd2	2.78983
ENSMUSG00000051627	Hist1h1e	2.8853	ENSMUSG00000091376	Aadacl2	36	ENSMUSG00000074340	Ovgp1	3.03448
ENSMUSG00000051639	Gm5812	2.22293	ENSMUSG00000091383	Hist1h2al	4.29208	ENSMUSG00000074345	Tnfaip8l3	7.37241
ENSMUSG00000052033	Pfdn4	2.86992	ENSMUSG00000091618	H60c	7.44082	ENSMUSG00000074364	Ehd2	4.44597
ENSMUSG00000052135	Foxo6	2.26866	ENSMUSG00000091625	Lsm5	2.61353	ENSMUSG00000074403	Hist2h3b	2.17047
ENSMUSG00000052293	Taf9	2.20228	ENSMUSG00000092281	Hmgb1-ps7	7.93939	ENSMUSG00000074445	Sprr2a3	5.18224
ENSMUSG00000052353	Cemip	107.419	ENSMUSG00000092381	Gm20512	2.54815	ENSMUSG00000074457	S100a16	2.69462
ENSMUSG00000052419	2610001J05Rik	2.77281	ENSMUSG00000092812	Gm23634	2.21901	ENSMUSG00000074476	Spc24	5.1453
ENSMUSG00000052565	Hist1h1d	4.55724	ENSMUSG00000093219	Mir3113	2.2921	ENSMUSG00000074577	Fam65c	2.50459
ENSMUSG00000052833	Sae1	2.10245	ENSMUSG00000093264	Gm23419	2.27247	ENSMUSG00000074580	4931440P22Rik	2.93439
ENSMUSG00000052997	Uba2	3.52908	ENSMUSG00000093656	Gm20628	3.55739	ENSMUSG00000074622	Mafb	4.27686
ENSMUSG00000053007	9430076C15Rik	3.27426	ENSMUSG00000093930	Hmgcs1	2.12132	ENSMUSG00000074656	Eif2s2	2.24655
ENSMUSG00000053025	Sv2b	52.6667	ENSMUSG00000094114	Gm21967	2.1	ENSMUSG00000074738	Fndc10	2.05729
ENSMUSG00000053317	Sec61b	2.48391	ENSMUSG00000094338	Hist1h2bl	5.86493	ENSMUSG00000074781	Ube2n	2.09507
ENSMUSG00000053338	Tarm1	2685	ENSMUSG00000094439	Gm21969	2.69126	ENSMUSG00000074923	Pak6	2.01323
ENSMUSG00000053398	Phgdh	2.91421	ENSMUSG00000095217	Hist1h2bn	4.42718	ENSMUSG00000075029	4930558J22Rik	3.27145
ENSMUSG00000053522	Lgals7	2.75672	ENSMUSG00000095241	Gm5478	20	ENSMUSG00000075031	Hist1h2bb	4.52559
ENSMUSG00000053626	Tll1	18.0141	ENSMUSG00000096010	Hist4h4	3.04738	ENSMUSG00000075232	Amd1	2.54843
ENSMUSG00000053654	Krt42	4.65468	ENSMUSG00000096740	Lbhd1	2.53529	ENSMUSG00000075266	Cenpw	4.50725
ENSMUSG00000053675	Tgm5	7.08511	ENSMUSG00000096807	Hist1h2bm	5.46605	ENSMUSG00000075391	Gm13443	2.18
ENSMUSG00000053716	Dusp7	2.89989	ENSMUSG00000097215	Gm26550	6.7039	ENSMUSG00000075402	Krt76	30.4167
ENSMUSG00000053797	Krt16	34.5412	ENSMUSG00000097239	Gm27029	2.09362	ENSMUSG00000075528	Aarsd1	2.08815
ENSMUSG00000053801	Grwd1	2.10741	ENSMUSG00000097357	Gm16793	2.1	ENSMUSG00000075602	Ly6a	4.39734
ENSMUSG00000054065	Pkp3	2.2948	ENSMUSG00000097419	Gm26666	14.0556	ENSMUSG00000075707	Dio3	8.76923
ENSMUSG00000054115	Skp2	2.35882	ENSMUSG00000097467	Gm26737	2.2878	ENSMUSG00000076142	Mir711	3.01493
ENSMUSG00000054342	Kcnn4	2.14754	ENSMUSG00000097472	Gm26586	2.15847	ENSMUSG00000076275	Mir675	11.5714
ENSMUSG00000054537	Tmprss11e	6.44554	ENSMUSG00000097541	Gm26752	2.39172	ENSMUSG00000076437	Selenoh	2.85009
ENSMUSG00000054717	Hmgb2	2.77691	ENSMUSG00000097664	Gm26765	2.10351	ENSMUSG00000076441	Ass1	3.66861
ENSMUSG00000054720	Lrrc8c	3.88822	ENSMUSG00000097681	Gm26643	2.4164	ENSMUSG00000078117	Gm16485	46.7589
ENSMUSG00000054753	AU018091	21.0714	ENSMUSG00000097800	B230344G16Rik	2.56918	ENSMUSG00000078144	Capns2	10.9845
ENSMUSG00000054766	Set	2.15421	ENSMUSG00000097899	Gm16894	5.54545	ENSMUSG00000078249	Hmga1-rs1	2.24299
ENSMUSG00000054871	Tmem158	2.23009	ENSMUSG00000097906	Gm9625	3.62173	ENSMUSG00000078453	Abracl	3.13665
ENSMUSG00000054889	Dsp	2.41253	ENSMUSG00000097908	4933404O12Rik	2.78082	ENSMUSG00000078630	Tomt	2.71739
ENSMUSG00000054920	Klhl5	2.07723	ENSMUSG00000098269	Mir8094	2.01431	ENSMUSG00000078657	Crnn	8.96667
ENSMUSG00000055368	Slc6a2	20.5	ENSMUSG00000098606	Mir6903	2.84706	ENSMUSG00000078706	Gm53	2.8375
ENSMUSG00000055407	Map6	2.68221	ENSMUSG00000098678	Mroh6	6.25532	ENSMUSG00000078773	Rad54b	3.71515
ENSMUSG00000055561	Spink5	2.45419	ENSMUSG00000098915	Rpl15-ps2	5.44872	ENSMUSG00000078812	Eif5a	2.31629
ENSMUSG00000055760	Gemin6	2.77419	ENSMUSG00000099143	Gm27483	23.8	ENSMUSG00000078816	Prkcg	4.06154
ENSMUSG00000056076	Eif3b	2.08728	ENSMUSG00000099517	Hist1h3g	7.08871	ENSMUSG00000078851	Hist3h2a	2.03437
ENSMUSG00000056201	Cfl1	2.85058	ENSMUSG00000099583	Hist1h3d	4.50219	ENSMUSG00000079144	A130010J15Rik	2.38795
ENSMUSG00000056209	Npm3	2.39562	ENSMUSG00000100096	Gm28760	4.78022	ENSMUSG00000079451	Tmprss11g	23.974
ENSMUSG00000056214	Pard6g	2.37218	ENSMUSG00000100210	Hist1h3f	4.32735	ENSMUSG00000079465	Col4a3	3.0604
ENSMUSG00000056220	Pla2g4a	4.99272	ENSMUSG00000101355	Hist1h3h	7.6678	ENSMUSG00000079553	Kifc1	6.35849
ENSMUSG00000056305	Usp39	2.10096	ENSMUSG00000101972	Hist1h3i	6.48852	ENSMUSG00000079685	Ulbp1	2.81176
ENSMUSG00000056394	Lig1	2.69214	ENSMUSG00000102234	Gm37885	2.12358	ENSMUSG00000080875	Gm7332	2.87143
ENSMUSG00000056612	Ppp1r14b	2.6286	ENSMUSG00000102975	Gm37347	36.087	ENSMUSG00000082319	Gm8822	3.16625
ENSMUSG00000056632	Dsg3	5.32321	ENSMUSG00000103789	Gm10129	3.21442	ENSMUSG00000082706	Gm11663	2.5
ENSMUSG00000056737	Capg	3.64461	ENSMUSG00000104608	Gm44390	11.6667	ENSMUSG00000083669	Gm10169	2.4382
ENSMUSG00000057278	Snrpg	2.97866	ENSMUSG00000104771	Gm44394	7.75581	ENSMUSG00000084257	Gm11597	54.7222
ENSMUSG00000057388	Mrpl18	2.36702	ENSMUSG00000104884	Mir5046	3.80233	ENSMUSG00000084822	Myadml2os	30.375
ENSMUSG00000057454	Lypd3	10.0664	ENSMUSG00000104913	Gm6560	4.16981	ENSMUSG00000084890	A830036E02Rik	10.4839
ENSMUSG00000057469	E2f6	2.29096	ENSMUSG00000104997	Gm44350	4.78656	ENSMUSG00000084968	Gm12743	4.97561
ENSMUSG00000057497	Fam136a	2.80859	ENSMUSG00000105001	AC117232.1	2.83001	ENSMUSG00000085023	Gm12744	5.45309
ENSMUSG00000057666	Gapdh	2.86941	ENSMUSG00000105014	Gm44367	7.01493	ENSMUSG00000085148	Mir22hg	3.92775
ENSMUSG00000057789	Bak1	2.246	ENSMUSG00000105072	Gm44335	7.8133	ENSMUSG00000085314	Gm14866	2.5847
ENSMUSG00000057933	Gsta2	8.35878	ENSMUSG00000105109	Gm44297	5.19757	ENSMUSG00000085337	Gm15964	2.14236
ENSMUSG00000058013	Sept11	2.22779	ENSMUSG00000105155	Gm42910	31.9167	ENSMUSG00000085360	Arhgap27os2	2.29524
ENSMUSG00000058022	Adtrp	7.52174	ENSMUSG00000105199	Gm43581	2.3956	ENSMUSG00000085505	Gm12868	18.6612
ENSMUSG00000058056	Palld	2.02208	ENSMUSG00000105204	Gm43738	2.83217	ENSMUSG00000085560	C230038L03Rik	4.12
ENSMUSG00000058126	Tpm3-rs7	2.07834	ENSMUSG00000105236	Gm44356	37.125	ENSMUSG00000085955	Gm12356	2.11847
ENSMUSG00000058258	Idi1	5.16608	ENSMUSG00000105433	Gm44486	4.11268	ENSMUSG00000085995	Gm2788	7.10256
ENSMUSG00000058267	Mrps14	2.09218	ENSMUSG00000105580	Gm44454	5.8248	ENSMUSG00000086083	Gm15829	2.31618
ENSMUSG00000058290	Espl1	3.66418	ENSMUSG00000105682	Gm44323	4.3036	ENSMUSG00000086322	E130218I03Rik	2.17419
ENSMUSG00000058354	Krt6a	36.7664	ENSMUSG00000105827	Hist2h2bb	3.98446	ENSMUSG00000086527	Gm15856	17.2273
ENSMUSG00000058355	Abce1	2.44603	ENSMUSG00000105899	Gm44383	186.167	ENSMUSG00000086645	Gm15743	4.12245
ENSMUSG00000058385	Hist1h2bg	3.972	ENSMUSG00000105924	Gm44359	5.13514	ENSMUSG00000087067	Gm11532	2.17127
ENSMUSG00000058454	Dhcr7	2.48514	ENSMUSG00000105987	AI506816	3.95963	ENSMUSG00000087213	2810408I11Rik	4.46809
ENSMUSG00000058704	Memo1	2.19976	ENSMUSG00000106088	Gm44342	40.7863	ENSMUSG00000087221	BC037032	2.09712
ENSMUSG00000058773	Hist1h1b	6.82203	ENSMUSG00000106137	Gm42538	2.3459	ENSMUSG00000087436	Gm16156	2.79743
ENSMUSG00000059040	Eno1b	3.98158	ENSMUSG00000106175	Gm44313	2.2485	ENSMUSG00000087651	1500009L16Rik	12.5625
ENSMUSG00000059195	Gm12715	2.03636	ENSMUSG00000106200	Gm44341	4.69888	ENSMUSG00000087692	Gm11940	4.1012
ENSMUSG00000059327	Eda	2.70769	ENSMUSG00000106203	Gm44484	7.09223	ENSMUSG00000087698	Gm13031	4.12281
ENSMUSG00000059668	Krt4	3.33594	ENSMUSG00000106281	Gm44346	7.06931	ENSMUSG00000087700	Gm15283	3.23743
ENSMUSG00000059674	Cdh24	2.93827	ENSMUSG00000106412	Gm44460	4.34667	ENSMUSG00000090069	E430024P14Rik	2.16667
ENSMUSG00000059743	Fdps	3.81159	ENSMUSG00000106431	Gm44492	2.42704	ENSMUSG00000090223	Pcp4	9.02174
ENSMUSG00000059791	Nrm	2.92218	ENSMUSG00000106933	Gm43621	3.92121	ENSMUSG00000090257	Gm4524	2.4103
ENSMUSG00000059824	Dbp	3.45982	ENSMUSG00000107012	4930528J11Rik	3.52802	ENSMUSG00000090356	Teddm3	23.0938
ENSMUSG00000059883	Irak4	2.19062	ENSMUSG00000107092	Gm7993	3.24838	ENSMUSG00000090458	Gm17122	2.9264
ENSMUSG00000059898	Dsc3	2.62412	ENSMUSG00000108126	Gm43909	3.10407	ENSMUSG00000090551	A730015C16Rik	2.07124
ENSMUSG00000060093	Hist1h4a	4.02718	ENSMUSG00000108353	Gm45205	3.42323	ENSMUSG00000090860	Gm17134	2.29903
ENSMUSG00000060147	Serpinb6a	2.83822	ENSMUSG00000108524	Gm44876	5.60145	ENSMUSG00000090877	Hspa1b	2.62655
ENSMUSG00000060288	Ppih	2.03499	ENSMUSG00000108806	Gm44729	2.83835	ENSMUSG00000090946	Ccdc71l	2.98583
ENSMUSG00000060402	Chst8	18.6275	ENSMUSG00000109735	Gm45667	5.94231	ENSMUSG00000091367	Gm17711	3.28163
ENSMUSG00000060639	Hist1h4i	3.69565	ENSMUSG00000110126	Gm9347	6.28125	ENSMUSG00000091383	Hist1h2al	2.87822
ENSMUSG00000060950	Trmt61a	2.28713	ENSMUSG00000110575	RP23-410L16.8	2.1982	ENSMUSG00000091618	H60c	5.42882
ENSMUSG00000060962	Dmkn	2.86072	ENSMUSG00000110899	RP23-284E19.10	2.19563	ENSMUSG00000091625	Lsm5	2.56039
ENSMUSG00000060969	Irx1	12.8374	ENSMUSG00000111329	RP23-228B2.3	2.11823	ENSMUSG00000091971	Hspa1a	2.44545
ENSMUSG00000061119	Prcp	2.37669	ENSMUSG00000111341	RP24-93F20.12	4.67273	ENSMUSG00000092381	Gm20512	2.42593
ENSMUSG00000061126	Cyp4f39	4.93855	ENSMUSG00000111394	RP23-320D23.6	3.09985	ENSMUSG00000092609	Gm20481	2.55549
ENSMUSG00000061360	Phf5a	2.8162	ENSMUSG00000111409	Rnf26	2.42188	ENSMUSG00000093264	Gm23419	2.51783
ENSMUSG00000061518	Cox5b	2.05519	ENSMUSG00000111602	RP24-250L13.2	2830	ENSMUSG00000093656	Gm20628	2.88272
ENSMUSG00000061527	Krt5	3.78613	ENSMUSG00000111632	RP24-329C11.11	2.325	ENSMUSG00000094338	Hist1h2bl	5.27014
ENSMUSG00000061559	Wdr61	2.37897	ENSMUSG00000111685	RP23-162P10.7	2.11834	ENSMUSG00000094595	Fsbp	2.31915
ENSMUSG00000061613	U2af1	2.11173	ENSMUSG00000111856	RP23-187B11.7	4.07947	ENSMUSG00000095217	Hist1h2bn	2.92233
ENSMUSG00000061615	Hist1h2ab	6.12405				ENSMUSG00000095241	Gm5478	12.8224
ENSMUSG00000061759	Armt1	2.44864				ENSMUSG00000096740	Lbhd1	2.23922
ENSMUSG00000061928	Dsg1b	93.6942				ENSMUSG00000096807	Hist1h2bm	4.43519
ENSMUSG00000061991	Hist1h2af	4.70065				ENSMUSG00000097125	Gm26885	4.69308
ENSMUSG00000062070	Pgk1	3.66487				ENSMUSG00000097215	Gm26550	6
ENSMUSG00000062203	Gspt1	2.19442				ENSMUSG00000097239	Gm27029	2.01418
ENSMUSG00000062248	Cks2	5.92444				ENSMUSG00000097293	D630002J18Rik	2.45385
ENSMUSG00000062397	Zfp706	2.34862				ENSMUSG00000097407	4933408J17Rik	2.9061
ENSMUSG00000062480	Acat3	2.33177				ENSMUSG00000097419	Gm26666	17.3889
ENSMUSG00000062510	Nsl1	3.8125				ENSMUSG00000097445	Gm26631	2.20482
ENSMUSG00000062554	Gm12751	2.90566				ENSMUSG00000097472	Gm26586	2.02373
ENSMUSG00000062727	Hist1h2bk	5.06579				ENSMUSG00000097541	Gm26752	2.48726
ENSMUSG00000062797	Hikeshi	2.36022				ENSMUSG00000097664	Gm26765	2.10636
ENSMUSG00000062933	Gm10123	2.59302				ENSMUSG00000097800	B230344G16Rik	2.38597
ENSMUSG00000062981	Mrpl42	2.46299				ENSMUSG00000098188	Sowahc	2.59957
ENSMUSG00000063021	Hist1h2ak	5.26632				ENSMUSG00000098204	Gm26984	21.8713
ENSMUSG00000063171	Rps4l	3.56471				ENSMUSG00000098650	Gm28048	2.08497
ENSMUSG00000063229	Ldha	4.30397				ENSMUSG00000098816	Gm27786	13.8182
ENSMUSG00000063406	Tmed5	2.28701				ENSMUSG00000099143	Gm27483	29.1
ENSMUSG00000063430	Wscd2	26.7391				ENSMUSG00000099517	Hist1h3g	5.52419
ENSMUSG00000063480	Nhp2l1	2.19811				ENSMUSG00000099583	Hist1h3d	3.38248
ENSMUSG00000063524	Eno1	3.3267				ENSMUSG00000100053	Gm28154	41.6
ENSMUSG00000063646	Jakmip1	6.04908				ENSMUSG00000100096	Gm28760	2.64835
ENSMUSG00000063683	Glyat	38.375				ENSMUSG00000100210	Hist1h3f	3.23244
ENSMUSG00000063694	Cycs	2.69838				ENSMUSG00000100393	Gm29491	2.69504
ENSMUSG00000063856	Gpx1	4.29253				ENSMUSG00000101355	Hist1h3h	5.98983
ENSMUSG00000063885	Gm6498	2.18065				ENSMUSG00000101406	Gm29200	2.40351
ENSMUSG00000063888	Rpl7l1	2.33918				ENSMUSG00000101859	Gm29233	3.73358
ENSMUSG00000064032	Gm10143	4.60086				ENSMUSG00000101892	9130401M01Rik	2.3042
ENSMUSG00000064080	Fbln2	2.63625				ENSMUSG00000101972	Hist1h3i	4.97321
ENSMUSG00000064147	Rab44	12.4545				ENSMUSG00000102140	Gm38058	3.07265
ENSMUSG00000064168	Hist1h2bh	7.46414				ENSMUSG00000102725	Gm37939	2.56226
ENSMUSG00000064193	Gm4735	3.64762				ENSMUSG00000102975	Gm37347	13.2609
ENSMUSG00000064232	Gm5414	7.42239				ENSMUSG00000103009	Gm4430	2.87919
ENSMUSG00000064254	Ethe1	3.08556				ENSMUSG00000103789	Gm10129	2.29657
ENSMUSG00000064288	Hist1h4k	3.27947				ENSMUSG00000104554	Gm42835	19.25
ENSMUSG00000064325	Hhip	74.1176				ENSMUSG00000104574	Gm42836	2.40187
ENSMUSG00000064347	mt-Ta	4.55102				ENSMUSG00000104608	Gm44390	9.33333
ENSMUSG00000064348	mt-Tn	4.7126				ENSMUSG00000104771	Gm44394	5.73256
ENSMUSG00000064349	mt-Tc	4.408				ENSMUSG00000104884	Mir5046	3.93023
ENSMUSG00000064797	Gm24357	3.2719				ENSMUSG00000104953	AC147560.1	2.18532
ENSMUSG00000065265	Gm23455	3.22301				ENSMUSG00000104997	Gm44350	3.6996
ENSMUSG00000066060	Gm12866	8.18056				ENSMUSG00000105001	AC117232.1	2.58972
ENSMUSG00000066072	Cyp4a10	1885				ENSMUSG00000105014	Gm44367	5.95522
ENSMUSG00000066551	Hmgb1	2.11649				ENSMUSG00000105072	Gm44335	6.17903
ENSMUSG00000066979	Bub3	2.10174				ENSMUSG00000105109	Gm44297	5.10638
ENSMUSG00000067006	Serpinb5	7.70841				ENSMUSG00000105155	Gm42910	23.0833
ENSMUSG00000067017	Gm3608	2.51335				ENSMUSG00000105433	Gm44486	4.46479
ENSMUSG00000067158	Col4a4	2.06383				ENSMUSG00000105580	Gm44454	5.51213
ENSMUSG00000067367	Lyar	3.38107				ENSMUSG00000105682	Gm44323	3.37188
ENSMUSG00000067455	Hist1h4j	3.01659				ENSMUSG00000105827	Hist2h2bb	3.20115
ENSMUSG00000067547	Gm7666	2.39252				ENSMUSG00000105899	Gm44383	100.583
ENSMUSG00000067608	Pcna-ps2	3.15274				ENSMUSG00000105924	Gm44359	4.21622
ENSMUSG00000067714	Lpar5	2.37918				ENSMUSG00000105987	AI506816	2.70467
ENSMUSG00000067780	Pi15	79.3173				ENSMUSG00000106088	Gm44342	29.2201
ENSMUSG00000068039	Tcp1	2.39176				ENSMUSG00000106200	Gm44341	3.03841
ENSMUSG00000068101	Cenpm	4.52703				ENSMUSG00000106203	Gm44484	5.54369
ENSMUSG00000068523	Gng5	2.6068				ENSMUSG00000106281	Gm44346	4.81188
ENSMUSG00000068566	Myadm	5.48041				ENSMUSG00000106412	Gm44460	3.64
ENSMUSG00000068749	Psma5	2.71004				ENSMUSG00000106431	Gm44492	2.33601
ENSMUSG00000068855	Hist2h2ac	2.80629				ENSMUSG00000106933	Gm43621	3.56364
ENSMUSG00000068893	Sprr2a2	11.5135				ENSMUSG00000107011	Gm42906	3.07647
ENSMUSG00000069255	Dusp22	4.08501				ENSMUSG00000107012	4930528J11Rik	2.24779
ENSMUSG00000069265	Hist1h3a	3.5026				ENSMUSG00000107040	Gm43791	2.00833
ENSMUSG00000069266	Hist1h4b	3.64199				ENSMUSG00000107092	Gm7993	2.7905
ENSMUSG00000069267	Hist1h3b	4.45997				ENSMUSG00000107470	Gm3375	2.71831
ENSMUSG00000069268	Hist1h2bf	5.68534				ENSMUSG00000107761	2010008C14Rik	2.55172
ENSMUSG00000069270	Hist1h2ac	3.86829				ENSMUSG00000108126	Gm43909	6.50679
ENSMUSG00000069272	Hist1h2ae	5.28056				ENSMUSG00000108353	Gm45205	2.37517
ENSMUSG00000069273	Hist1h3e	3.36388				ENSMUSG00000108524	Gm44876	4.78261
ENSMUSG00000069274	Hist1h4f	3.43426				ENSMUSG00000108793	Gm45213	3.35667
ENSMUSG00000069300	Hist1h2bj	6.66756				ENSMUSG00000109695	Gm31166	3.8411
ENSMUSG00000069301	Hist1h2ag	6.25676				ENSMUSG00000109735	Gm45667	4.34615
ENSMUSG00000069302	Hist1h2ah	8.53922				ENSMUSG00000109799	Gm45515	2.26364
ENSMUSG00000069303	Hist1h2br	3.2				ENSMUSG00000109941	Exosc6	2.35227
ENSMUSG00000069305	Hist1h4n	2.70395				ENSMUSG00000110899	RP23-284E19.10	2.74539
ENSMUSG00000069308	Hist1h2bp	4.93478				ENSMUSG00000111329	RP23-228B2.3	2.70279
ENSMUSG00000069309	Hist1h2an	6.20548				ENSMUSG00000111394	RP23-320D23.6	2.55738
ENSMUSG00000069310	Hist1h3c	4.95224				ENSMUSG00000111602	RP24-250L13.2	2420
ENSMUSG00000069441	Dsg1a	11.8674				ENSMUSG00000111856	RP23-187B11.7	3.87417
ENSMUSG00000069744	Psmb3	2.332
ENSMUSG00000069793	Slfn9	2.62017
ENSMUSG00000069808	Fam57a	5.32493
ENSMUSG00000069910	Spdl1	3.35443
ENSMUSG00000070372	Capza1	2.13333
ENSMUSG00000070392	Gm20634	2.09497
ENSMUSG00000070436	Serpinh1	2.24735
ENSMUSG00000070639	Lrrc8b	2.59768
ENSMUSG00000070868	Skint3	3
ENSMUSG00000071072	Ptges3	2.47539
ENSMUSG00000071470	Ccnb1ip1	3.53125
ENSMUSG00000071478	Hist1h2ad	6.06926
ENSMUSG00000071516	Hist1h2ai	5.08639
ENSMUSG00000071537	Klrg2	3.63017
ENSMUSG00000071547	Nt5dc2	12.2679
ENSMUSG00000071604	Fam189a2	3.51341
ENSMUSG00000071653	1810009A15Rik	3.32845
ENSMUSG00000071858	Gm94	10.524
ENSMUSG00000071866	Ppia	2.43508
ENSMUSG00000072082	Ccnf	5.03
ENSMUSG00000072845	Tmprss11a	74.7476
ENSMUSG00000072980	Oip5	2.8764
ENSMUSG00000073616	Myeov2	2.88807
ENSMUSG00000073676	Hspe1	3.11821
ENSMUSG00000073705	Apitd1	4.02206
ENSMUSG00000073775	Kti12	2.39125
ENSMUSG00000073910	Mob3b	2.47409
ENSMUSG00000074183	Gsta1	10.4
ENSMUSG00000074199	Krtdap	2.35104
ENSMUSG00000074259	Gramd2	3.10847
ENSMUSG00000074364	Ehd2	4.20481
ENSMUSG00000074403	Hist2h3b	2.80673
ENSMUSG00000074445	Sprr2a3	9.49533
ENSMUSG00000074457	S100a16	3.18677
ENSMUSG00000074476	Spc24	6.57265
ENSMUSG00000074622	Mafb	6.32736
ENSMUSG00000074623	Gm826	15.7778
ENSMUSG00000074647	Fam83c	2.1732
ENSMUSG00000074656	Eif2s2	2.57303
ENSMUSG00000074781	Ube2n	2.34993
ENSMUSG00000074797	Itpa	2.08911
ENSMUSG00000074802	Gas2l3	2.59223
ENSMUSG00000074923	Pak6	2.02071
ENSMUSG00000075029	4930558J22Rik	3.70515
ENSMUSG00000075031	Hist1h2bb	4.92254
ENSMUSG00000075229	Ccdc58	2.27104
ENSMUSG00000075232	Amd1	2.64617
ENSMUSG00000075266	Cenpw	5.62319
ENSMUSG00000075402	Krt76	31.0833
ENSMUSG00000075528	Aarsd1	2.1307
ENSMUSG00000075602	Ly6a	5.35155
ENSMUSG00000075707	Dio3	8.4359
ENSMUSG00000076275	Mir675	15.6667
ENSMUSG00000076437	Selenoh	3.44023
ENSMUSG00000076441	Ass1	3.87927
ENSMUSG00000078117	Gm16485	54.6312
ENSMUSG00000078144	Capns2	11.6434
ENSMUSG00000078249	Hmga1-rs1	3.82243
ENSMUSG00000078348	Sf3b5	2.5253
ENSMUSG00000078453	Abracl	4.57557
ENSMUSG00000078572	Ndufaf8	2.17857
ENSMUSG00000078630	Tomt	3.08696
ENSMUSG00000078664	Sprr2a1	10.3077
ENSMUSG00000078713	Tomm5	2.45739
ENSMUSG00000078773	Rad54b	3.01818
ENSMUSG00000078812	Eif5a	2.50449
ENSMUSG00000078816	Prkcg	3.84615
ENSMUSG00000078851	Hist3h2a	2.2739
ENSMUSG00000078941	Ak6	2.27131
ENSMUSG00000079225	Gm9531	2.46259
ENSMUSG00000079451	Tmprss11g	32.545
ENSMUSG00000079465	Col4a3	2.89262
ENSMUSG00000079523	Tmsb10	2.53854
ENSMUSG00000079553	Kifc1	5.83962
ENSMUSG00000079685	Ulbp1	4.49412
ENSMUSG00000080242	Gm15487	2.21582
ENSMUSG00000080875	Gm7332	3.41429
ENSMUSG00000081683	Fzd10	2.3696
ENSMUSG00000082044	Snrpert	2.56044
ENSMUSG00000082127	Gm13577	2.69231
ENSMUSG00000082319	Gm8822	3.76071
ENSMUSG00000082706	Gm11663	2.99138
ENSMUSG00000082766	1700064H15Rik	14.875
ENSMUSG00000084159	Gm12696	2.17553
ENSMUSG00000084257	Gm11597	73.8333
ENSMUSG00000084890	A830036E02Rik	12.8065
ENSMUSG00000084968	Gm12743	4.92683
ENSMUSG00000085023	Gm12744	7.41076
ENSMUSG00000085314	Gm14866	2.39891
ENSMUSG00000085360	Arhgap27os2	2.32619
ENSMUSG00000085457	1110046J04Rik	2.30671
ENSMUSG00000085495	Gm16796	2.86316
ENSMUSG00000085505	Gm12868	18.3514
ENSMUSG00000085560	C230038L03Rik	3.268
ENSMUSG00000085666	Gm9855	2.25833
ENSMUSG00000085955	Gm12356	2.73868
ENSMUSG00000085995	Gm2788	6.61538
ENSMUSG00000086241	4930483K19Rik	2.15566
ENSMUSG00000086527	Gm15856	20.1818
ENSMUSG00000086645	Gm15743	5.93878
ENSMUSG00000086683	Gm12867	4.88889
ENSMUSG00000087213	2810408I11Rik	5.53191
ENSMUSG00000087249	Gm16062	2.22026
ENSMUSG00000087436	Gm16156	2.7492
ENSMUSG00000087651	1500009L16Rik	15.9375
ENSMUSG00000087692	Gm11940	5.31694
ENSMUSG00000087698	Gm13031	3.77193
ENSMUSG00000087700	Gm15283	4.66407
ENSMUSG00000089647	Gm2245	2.43429
ENSMUSG00000089728	Clec2f	2.86441
ENSMUSG00000090223	Pcp4	13.1304
ENSMUSG00000090257	Gm4524	2.79396
ENSMUSG00000090356	Teddm3	37.6875
ENSMUSG00000090458	Gm17122	3.09645
ENSMUSG00000090551	A730015C16Rik	2.37731
ENSMUSG00000090553	Snrpe	2.31958
ENSMUSG00000090860	Gm17134	2.38801
ENSMUSG00000091165	Gm17036	2.09274
ENSMUSG00000091228	Gm20390	2.57118
ENSMUSG00000091367	Gm17711	4.79592
ENSMUSG00000091376	Aadacl2	21.1
ENSMUSG00000091383	Hist1h2al	2.8396
ENSMUSG00000091405	Hist2h4	2.61294
ENSMUSG00000091471	Gm20538	2.06897
ENSMUSG00000091537	Tma7	2.17012
ENSMUSG00000091618	H60c	5.1681
ENSMUSG00000091625	Lsm5	3.7343
ENSMUSG00000093656	Gm20628	3.53337
ENSMUSG00000093769	Hist2h3c1	2.14286
ENSMUSG00000093930	Hmgcs1	2.63588
ENSMUSG00000094114	Gm21967	2.3875
ENSMUSG00000094338	Hist1h2bl	6.00474
ENSMUSG00000094638	Gm21972	2.23852
ENSMUSG00000095217	Hist1h2bn	4.1335
ENSMUSG00000095241	Gm5478	18.3551
ENSMUSG00000095464	Gm21987	2.18221
ENSMUSG00000096221	1500002C15Rik	2.52918
ENSMUSG00000096740	Lbhd1	3.3098
ENSMUSG00000096807	Hist1h2bm	5.46296
ENSMUSG00000097215	Gm26550	5.72468
ENSMUSG00000097239	Gm27029	2.08227
ENSMUSG00000097357	Gm16793	2.04545
ENSMUSG00000097407	4933408J17Rik	3.34742
ENSMUSG00000097419	Gm26666	43.9444
ENSMUSG00000097445	Gm26631	2.50803
ENSMUSG00000097472	Gm26586	2.4
ENSMUSG00000097537	2610020C07Rik	2.125
ENSMUSG00000097541	Gm26752	2.51911
ENSMUSG00000097622	A330033J07Rik	2.43805
ENSMUSG00000097664	Gm26765	2.1415
ENSMUSG00000097681	Gm26643	2.84543
ENSMUSG00000097800	B230344G16Rik	2.02195
ENSMUSG00000097817	Gm26810	2.15343
ENSMUSG00000097899	Gm16894	3.60606
ENSMUSG00000098188	Sowahc	2.04208
ENSMUSG00000098192	Gm3534	2.27586
ENSMUSG00000098204	Gm26984	23.2749
ENSMUSG00000098678	Mroh6	6
ENSMUSG00000098816	Gm27786	18.5909
ENSMUSG00000099143	Gm27483	44.4
ENSMUSG00000099517	Hist1h3g	7.29032
ENSMUSG00000099583	Hist1h3d	4.21898
ENSMUSG00000099590	C330022C24Rik	2.38084
ENSMUSG00000100053	Gm28154	57.8
ENSMUSG00000100096	Gm28760	4.27473
ENSMUSG00000100192	Gm29587	9.18182
ENSMUSG00000100210	Hist1h3f	4.35202
ENSMUSG00000101355	Hist1h3h	6.69153
ENSMUSG00000101892	9130401M01Rik	2.40504
ENSMUSG00000101972	Hist1h3i	5.8176
ENSMUSG00000102140	Gm38058	2.67521
ENSMUSG00000102234	Gm37885	2.09269
ENSMUSG00000102975	Gm37347	22.8696
ENSMUSG00000103009	Gm4430	2.84564
ENSMUSG00000103789	Gm10129	2.35511
ENSMUSG00000104217	Gm37988	2.0315
ENSMUSG00000104554	Gm42835	25.5
ENSMUSG00000104574	Gm42836	2.57009
ENSMUSG00000104608	Gm44390	13.3333
ENSMUSG00000104771	Gm44394	5.43605
ENSMUSG00000104884	Mir5046	4.38372
ENSMUSG00000104953	AC147560.1	2.43408
ENSMUSG00000104997	Gm44350	4.35968
ENSMUSG00000105001	AC117232.1	3.13536
ENSMUSG00000105014	Gm44367	6.56716
ENSMUSG00000105072	Gm44335	7.02813
ENSMUSG00000105109	Gm44297	5.2462
ENSMUSG00000105155	Gm42910	46.6667
ENSMUSG00000105204	Gm43738	3.18315
ENSMUSG00000105236	Gm44356	31.875
ENSMUSG00000105433	Gm44486	5.22535
ENSMUSG00000105580	Gm44454	5.70081
ENSMUSG00000105682	Gm44323	3.47682
ENSMUSG00000105827	Hist2h2bb	3.87078
ENSMUSG00000105899	Gm44383	145.958
ENSMUSG00000105924	Gm44359	5.88288
ENSMUSG00000105987	AI506816	2.76275
ENSMUSG00000106088	Gm44342	36.9893
ENSMUSG00000106137	Gm42538	2.25055
ENSMUSG00000106175	Gm44313	2.24449
ENSMUSG00000106179	AL603834.1	2.63309
ENSMUSG00000106200	Gm44341	3.057
ENSMUSG00000106203	Gm44484	6.66019
ENSMUSG00000106281	Gm44346	6.73267
ENSMUSG00000106412	Gm44460	4.22667
ENSMUSG00000106431	Gm44492	2.98929
ENSMUSG00000106834	Gm10459	2.24752
ENSMUSG00000106990	Gm42547	2.22695
ENSMUSG00000107011	Gm42906	2.63529
ENSMUSG00000107012	4930528J11Rik	2.60767
ENSMUSG00000107092	Gm7993	2.82073
ENSMUSG00000107470	Gm3375	3.20423
ENSMUSG00000107761	2010008C14Rik	2.72414
ENSMUSG00000108126	Gm43909	4.41176
ENSMUSG00000108353	Gm45205	2.36048
ENSMUSG00000108524	Gm44876	4.31884
ENSMUSG00000108793	Gm45213	3.37667
ENSMUSG00000109735	Gm45667	4.375
ENSMUSG00000109941	Exosc6	2.34848
ENSMUSG00000110537	RP23-115O21.3	6.33333
ENSMUSG00000110704	RP23-430K5.3	2.17347
ENSMUSG00000110899	RP23-284E19.10	3.26883
ENSMUSG00000111329	RP23-228B2.3	3.38752
ENSMUSG00000111394	RP23-320D23.6	2.23489
ENSMUSG00000111602	RP24-250L13.2	4860
ENSMUSG00000111685	RP23-162P10.7	2.11243
ENSMUSG00000111856	RP23-187B11.7	3.42384
ENSMUSG00000111877	RP24-389J11.1	2.13953
