# Supplementary material
Source: Research Square preprint supplement (doi:10.21203/rs.3.rs-9812305/v1)
Supplement: Supplementary file 4 [file 31030d7ce0e926e5a1eb73e7.xlsx]

## Sheet: Sheet1
Table 14. Comparison of upregulated genes upon E2 in fibroblast cells of uterus and vagina.
Common genes in "Uterus fibro.", and "Vagina fibro."	Genes specifically upregulated in fibro. Of uterus	Genes specifically upregulated in fibro. Of vagina
Ngfr	Cox5a	Scn4a
S100a4	Sdhd	Icam2
S100a6	Drp2	Efnb2
Col6a1	Comt	Ube2c
Timp1	Mcts1	Hoxc11
Ramp2	Fap	Ltbp1
Il16	Egfl6	Rhoc
Ssr4	Clcn4	Il17ra
Angptl4	Hoxb6	Atp6v1f
Cd320	Loxl3	Pcp2
Ndufa11	Sult5a1	Crabp2
Uck1	Ccl3	Hspb1
Tgfb1	Rmnd5b	Ddx39
Pla1a	Uhrf1	Mthfd2
Adgre5	Lsr	Kit
Fkbp11	Sync	Srm
Phyhip	Acp5	Nphs1
Cstb	Glmp	Dio2
Prlr	Col1a1	Rplp1
Hmox1	Itga3	Rps18
Hspb7	Fkbp10	Ube2g2
Ggt5	Akr1b3	Mrpl52
Ccl8	Hoxc8	Stc1
Slc16a12	Hoxc6	C4a
Fxyd5	Ddt	Scube1
Aldh1a2	Cldn15	Cox7c
Lbp	Naglu	Jph2
Atp5e	Capns1	Tnfaip3
Ndufa1	Folr1	Srgn
Phf21b	Esam	Adora2a
Hist1h2bc	Gria3	Mrps24
Pfn1	Fam98a	Fam20a
Gpx3	Ltbp2	Mboat2
Atox1	Mdp1	Ern1
Slc25a39	Dhrs1	Nr1d1
Plod1	Rgs19	Tshr
Gdpd2	Tiam1	Bdkrb2
Arg1	Fkbp7	Rdh12
Cfap54	Mrpl2	Smoc1
Socs2	Bcam	Irf4
Igf1	Cacnb3	Mxd3
Uqcr11	Pld3	Comtd1
Col6a2	Cyp4f18	Mrpl57
Adcy1	Dusp3	Wnt7b
Ccl11	Slc25a1	Ly6c2
Nt5c	Ddr1	Ly6i
Rhbdf2	Rps6ka1	Krt6b
Nme2	Mast2	Rpl36-ps2
Papln	Bax	Rps14
2010107E04Rik	Mmd	Scgb1a1
Thbs4	Fam162a	Fth1
Emb	Gstm5	Cdk2ap2
Plau	Col5a3	Lgals12
Cacna2d3	Clec11a	Padi4
Ripk3	Etfb	Adam8
St3gal6	Stxbp2	Urah
Sdf2l1	Pgf	1500015O10Rik
Adcy5	Ap1s1	Il1r2
Msrb2	Map2k1	Serpine2
Thbs2	Mri1	Cd55b
Pla2g7	Sgsh	Rgs7
Trem2	Man2b1	Sele
Uqcc2	Cs	Kif5c
Dsc2	Ampd3	1700019N19Rik
Pcsk5	Gata6	Ptpn1
Tmem132a	Reep5	Map1lc3a
Slc15a3	Tuft1	Trpc4
Ehd1	Prg4	Il6ra
Pold4	Tbcb	Ddah1
Prdx5	Htra1	Ccdc107
Gfra1	Tmem147	Sh3gl2
Bnc1	Crip2	Epha10
Padi1	Crip1	Sesn2
Slco5a1	Elovl1	Uts2
Akr1cl	Epha2	Stk32b
Nppc	Zdhhc24	Cckar
Ecel1	Slc4a3	Plac8
Gpr39	Sulf2	Ppbp
Lypd1	P3h4	Epo
Nfasc	Clic1	Rad52
Spta1	Cav1	Cand2
Ak1	0610009B22Rik	Kif22
Dhrs9	Cpt1c	Naa10
Angpt4	Ift43	Arhgap4
Zbp1	Ap2s1	Eif4ebp1
Raly	Elk3	Phxr4
a	Mgst1	Thy1
Ahcy	Nfib	Clstn2
Wisp2	Ap1b1	Chsy1
Vcam1	Met	Trib3
Lrat	Sardh	Slc10a3
Ecm1	Kcnd1	Prr5l
Col24a1	Sdhb	Apol6
Txn1	Hyal1	Ankmy1
Alpl	Spire2	Arhgap27
Padi2	Tmem86a	Zxdc
Draxin	Nedd8	Slc24a1
Ereg	Apol7a	Uroc1
Anxa3	Pigyl	Prr7
Dbpht2	Scarf2	Dhcr24
A2m	Rpa3	Mrpl54
Cib1	Mlkl	Wnk4
Prss23os	Cdh23	Lars2
Ptpn5	Ptprs	Wdr38
Slc6a14	Card14	Krt17
Cox7b	St3gal1	Tmprss11b
Pgls	Trpv4	Adamtsl2
Pgr	Ndufa2	5031439G07Rik
Hsd11b2	Csf1	Phf24
Gpr83	Nol3	Igfbp7
Agt	Elmo3	Rpl39-ps
Cryab	4931428F04Rik	Nov
Tmem266	Tsen15	Atp8a1
Ctsh	Lage3	Ncapd2
Plod2	Cybb	Dennd2a
Slco2a1	Itga2	Atp5l
Col6a4	Lpl	Rap1gap2
Colgalt2	Atp6v0e	F13a1
Bmp8a	Gata3	Igfbp2
Tagap	Gata5	Prrx2
Akr1c14	Lama5	Grin3a
Ptgdr2	Steap1	Dnm3
Lif	Steap2	Mthfd1l
Gpsm3	Pdzd11	Bdkrb1
Eva1a	Mrpl32	Trpc5
Dcbld2	Cnih1	Sprr2d
Ccl7	Ncapg	Grk3
Ndufa3	Celsr1	Pm20d1
Ptprq	Ppdpf	Cilp
Fam65b	E2f3	Golga7b
Tmem258	Ppfibp1	Acad12
P2ry14	Cd34	Gm6863
Gng12	Gtf3a	Fam221b
Greb1	Il10	Oaz1-ps
Adamts2	Cmah	Krt13
Cox6b1	Ttll12	Gm1821
Nfkbid	Slpi	Uqcrq
Inhbb	Sdc4	Tubg2
Spon2	Il13ra1	Wdr89
Fbxw17	Mpp2	Ccdc42
Spon1	C1qtnf1	Rpl37a
Arl5c	Slc35c2	Rpl27a
Trp53inp2	Myo1c	Hmga1
Pmepa1	Dhx58	Rpl14-ps1
Atp5j2	B4galt5	Sfn
Mboat1	Ptgis	Krt87
Rpl22l1	Cyb5r3	Rpsa-ps10
Pomt1	Anxa6	Nog
Prss23	Ypel2	Rpl29
Sdk1	Sparc	Hist1h1a
Gramd1b	Cdk5rap3	Arl4c
Emp3	Copz2	Gm9843
Bace2	Slc25a35	Rps27rt
S100g	Pank3	Sema5b
Eml2	Rars	Rps10
Ramp3	Wwc1	Gm5963
Sox5	Cxcl16	Nav2
Cox6a1	Med11	4930597O21Rik
Tspo	Ccl6	Krt42
Myrip	Natd1	Dancr
Ndufa7	Slc35b4	Ptrh1
Shisa4	Fis1	Krt16
Slc16a6	Rab3d	Tmem158
S100a10	Scrn1	Gm8430
S100a13	Tmem160	Cldn23
Lgr6	Scn1b	S100a8
Lgals2	Dpep1	1810011O10Rik
S100a1	Aoc3	Mettl7a2
Serpinb1a	Plscr3	Gadl1
S1pr1	Cops6	Gm7536
Lhfpl2	Gyg	Gm6139
Sbsn	Polr2i	Rpl38
Scand1	Frk	Gm6807
Gjb2	Clvs2	Rps18-ps3
Bst2	Trdn	Gapdh
Ddit4l	Lrp11	Rpl32
Fcgbp	Fuca2	Rpl36
Tenm4	Perp	Gm10036
Gm4737	Rtn4ip1	Gm5148
Msx1	Aim1	Krt6a
Oxtr	Cdk1	Rpl10-ps3
Trappc1	Rhobtb1	Rpl28-ps1
Tmem200a	Dusp6	Rpl18a-ps1
2410015M20Rik	Ndufa12	Gm8129
Mrps16	Vsir	Hopx
Ankrd55	Srgap1	Gm7331
Grem2	Cobl	Rps26-ps1
Bpifc	Nav3	Gm10073
Dscam	Csrp2	Gm10076
Lgals3	Timm13	Nrg2
Sprr1a	Hmg20b	Rps16-ps2
Il31ra	Pofut2	Rps10-ps1
Lamtor4	Hint1	H2-Q7
Sprr2f	Stc2	Gm10086
Atp5k	Tpgs1	Csmd1
Gja1	Mdh1	Dmkn
P4ha3	Ccng1	Irx1
Mtcl1	Nudcd2	Gm11361
Nrk	Hmmr	Cxcl12
Sec61b	Cyfip2	Gm7866
Hunk	Hspa4	Hist1h2ab
Adam12	Pdlim4	Gm5805
Tmem119	Tnip1	Dsg1b
Cntn1	Vdac1	Rps12
St3gal5	Tcn2	Rpl17
Chn1	Ogdh	Ftl1-ps1
Ppp1r14b	Myl7	Rpl9-ps6
Cxcl2	Aebp1	Gm5453
Naa38	Polm	Fabp4
Znhit1	Dbnl	2310039H08Rik
Uqcr10	Gria1	Gm5239
Rgs3	Arsg	AI413582
Mug1	Fam84a	Nrg1
H2afj	Rdh14	Calml3
Chst8	Rsad2	Klk1b27
Myl4	Efr3b	Sorcs3
Pclo	Pxdn	Rps15
Gm10123	Itgb3	1700112E06Rik
Gpx1	Mrc2	C230062I16Rik
Klk1	Asic2	Gm8730
Fbln2	Adap2	Klk1b24
mt-Rnr1	Slc9a3r1	Chchd1
Col4a4	Mif4gd	Rps6-ps1
Agtr2	Ten1	Gm6498
Il3ra	Kif1c	Krt2
Hist1h3b	Pld2	Gm5414
Mesdc1	Slc46a1	Rpl19-ps1
Rbm47	Slc6a4	mt-Rnr2
Trabd2b	Nxn	mt-Ta
1700086L19Rik	Abcc3	mt-Tn
Map3k5	Krt19	mt-Co2
Usmg5	Top2a	mt-Atp6
Fam189a2	Dcakd	mt-Co3
Myo18b	Ston2	Gm26448
C4b	Nova1	Gm26447
Myeov2	Fut8	Snora73a
Adh1	9030617O03Rik	Gm23624
Tnfaip8l3	Fbln5	Gm23925
Gm14005	Lgmn	Snora23
Ly6a	Entpd5	Snord21
Gm24336	Vash1	Snora9
Ly6c1	Traf3	Gm24620
Gm22953	Gng4	Snora7a
Gm12247	Ryr2	Snora41
Gm5526	Sfrp4	Snora44
Gm14866	Tmem14c	Gm22620
C230038L03Rik	Tbc1d7	Gm25788
Gm11978	Aspn	Snora52
Gm12248	Ogn	Gm25813
Gm16277	Nxnl2	Gm24146
1700110K17Rik	Fars2	Gm25852
Sox5os1	Syk	Gm26330
Pet100	Sfxn1	n-R5s193
Gm13031	Prelid1	Gm23442
Gm16559	Txndc15	Snord118
Lrrc10b	Uqcrb	Snora21
Gm20390	Adcy2	Gm23238
Gm17509	Golm1	Rny3
Gm21973	Erap1	Snord15b
Gm26712	Ndufs6	Snora70
Hist1h3d	Mrpl36	Gm22422
Plet1os	Clptm1l	Gm26035
Gm37539	Serf1	Snora3
Gm36993	Elovl7	Gm22362
Gm43109	Ddx4	Rn7sk
Gm44364	Plpp1	Gm24044
Gm42674	Gpx8	Snord22
Gm43809	Fam213a	Gm26493
Gm43708	Spcs1	Snora16a
RP23-23P9.5	Ctsb	Gm26130
RP24-250L13.2	Gata4	Vaultrc5
RP24-294A16.4	Anxa8	Rnu12
	Fgf9	Gm24616
	Wnt5a	Gm25791
	Esd	Gm22973
	Lcp1	Gm23973
	Dnajc15	Gm23245
	Tnfsf11	Gm22058
	Diaph3	Snora34
	Clu	Snora73b
	Ephx2	Gm26397
	Stmn4	Snora74a
	Bmp1	Gm23105
	Uchl3	Snora5c
	Cln5	Gm23734
	Dab2	Rny1
	Lrp10	Gm26168
	Psmb5	Gm26165
	Jph4	Gm22154
	Dhrs4	Gm23037
	Psme1	Snord35a
	Emc9	Gm26316
	Laptm4b	Gm26315
	Zfpm2	n-R5s185
	Emc2	Gm24523
	Mtss1	Gm24447
	Ndufb9	n-R5-8s1
	C1qtnf6	C330021F23Rik
	Ttll1	Gm13611
	Smdt1	Gm12918
	Rapgef3	Gm10263
	Nubp1	Klk1b21
	Fgf12	Gm10175
	Bop1	Gm10180
	Gpaa1	Rps23-ps2
	Gsdmd	Serpinb7
	Ly6h	Rps15a-ps5
	Ly6e	Nipal1
	Lynx1	H2-Q10
	Mapk12	Rps25-ps1
	Alcam	Hist1h4j
	Retnlg	Rpl35a-ps3
	Ccdc80	Krt83
	Snai2	Krt81
	Mrpl40	Gm10221
	Tmem45a	Romo1
	Adgrg7	Rpl31-ps8
	Slc7a4	Lgals1
	B4galt4	Gm11808
	Umps	Gm5879
	Fstl1	Slc4a5
	Itgb5	Rpl34-ps1
	Ndufb4	Hist1h2ac
	Ece2	Hist1h2ae
	Pdia5	Hist1h4f
	Cxadr	Hist1h2bj
	Atp5o	Hist1h2ag
	Ifngr2	Hist1h2br
	Krt7	Dsg1a
	Krt18	Gm10275
	Csad	Rps12-ps9
	Igfbp6	Rps13-ps2
	Prr13	Snora33
	Bsg	Snora57
	Serping1	n-R5s33
	Serinc2	Gm10288
	Scg5	Rps12-ps10
	Parp3	Rps15-ps2
	Tmem176a	Hist1h2ad
	Pigx	Hist1h2ai
	Mpc1	Rpl37rt
	Adgrf4	Gm10443
	Ppil1	Lst1
	Ndufv3	Gm10720
	Emilin2	Gm4149
	Xdh	Gm10800
	Prkd3	Gm10801
	Ttc27	Hist1h2bb
	Eif2ak2	Gpx4
	Qpct	Dio3
	Ndufv2	n-R5s1
	Eci1	n-R5s2
	Epas1	n-R5s64
	Mlst8	Gm24276
	C3	Mir682
	Hn1l	Gm23935
	Fam234a	Gm24270
	Adcyap1	Oxct2a
	Sil1	Gm24119
	C2	Snora17
	Epb41l4a	Rnu11
	Npc1	Gm24233
	Ttc39c	Snora68
	Ap3s1	Gm24888
	Lvrn	Snora64
	Ppp2r2b	Snord17
	Rab27b	Snord83b
	Lox	Rps12l1
	Ppic	Gm16485
	Me2	Rpl23a-ps3
	Fbn2	Capns2
	Isoc1	Gm12184
	Csf1r	Gm2000
	Psat1	Gm12854
	Cyb5a	Nkain1
	Anxa1	9530053A07Rik
	Tmem138	Sec61g
	Fam111a	Tmprss11g
	Ostf1	Col4a3
	Trpm6	Tmsb10
	Prpf19	Rpl39
	Stambpl1	Rpl28-ps3
	Ppp2r5b	Gm25776
	Lipa	Gm25848
	Rab1b	Gm22486
	Rin1	Gm25541
	Aldh3b1	Gm22710
	Pcx	Gm9385
	Papss2	Rpl38-ps2
	Ltbp3	Gm15427
	Rps6ka4	Rpl19-ps11
	Gpr137	Rpl35a-ps2
	Rcor2	Gm14303
	Gpam	Rps13-ps4
	Acsl5	Gm13680
	Prdx3	Rps6-ps4
	Aldh18a1	Gm14165
	Xpnpep1	Gm12338
	Hspa12a	Rpl17-ps5
	Cbr2	Rpl17-ps10
	Rab40b	Gm15536
	Hps1	Gm11960
	Got1	Rpl17-ps8
	Scd2	Pramel
	Sfxn3	Rpl19-ps12
	Hexa	Rpl27-ps2
	Zfhx4	Gm14036
	Maged2	Gm11425
	Abhd6	Rps6-ps3
	Flnb	Gm15464
	Itga7	Rpl13-ps1
	Chmp6	Gm11953
	Cnpy2	Gm14323
	Echs1	Rps15a-ps6
	Fuom	Gm11249
	Prap1	Gm11826
	Psmd13	Gm11539
	Taldo1	Gm6433
	Eps8l2	Gm14044
	Cd151	Gm11263
	Tmem192	Gm13340
	Gusb	Gm14414
	Farp1	Gm14586
	Tmc6	Gm8624
	Shisa5	Gm13436
	Rhbdl1	Rps15a-ps4
	Prps2	Gm4342
	Larp1b	Gm11478
	Ly96	Gm6136
	Atp5c1	Gm15710
	Slco3a1	Rpl3-ps2
	Pgm2	Gm15421
	Nrp1	Gm14541
	Pdia4	Rps15a-ps3
	Cplx2	Tpt1-ps3
	Higd2a	Rpl10a-ps1
	Tspan17	Gm25107
	Myo5b	Gm22988
	Lypla1	Gm25291
	Lactb2	Gm12744
	Idh1	Snhg15
	Casp8	Snhg3
	Ndufb3	Gm12254
	Col5a2	Gm15478
	Col3a1	Snhg17
	Kdelc1	Gm3362
	Il1rl1	4930526A20Rik
	Il18r1	Gm15564
	Mitd1	Gm2830
	2010300C02Rik	Gm15655
	Tmeff2	2410006H16Rik
	Plekhb2	Snhg20
	Sdhaf4	4930481A15Rik
	Smap1	Gm15477
	B3gat2	Gm15501
	Slc11a1	A630031M04Rik
	Fn1	Gm12404
	Glb1l	Rprl2
	Sp100	Gm25117
	Mlph	Snora81
	Serpinb8	Gm24245
	Cln8	Gm25394
	Tnfrsf11a	Gm25395
	Ptprc	Gm25492
	Pigr	Rprl3
	Slc45a3	Mir1949
	Lamc1	Rmrp
	Lamc2	Scarna3b
	Ncf2	Gm23751
	Kif26b	Gm25911
	Desi2	Gm26083
	Fh1	Gm24187
	Ifi211	Gm24727
	Nme7	Gm23262
	Atp1b1	Gm22767
	F5	Snora78
	Cenpf	Scarna6
	Ccdc3	Scarna3a
	Mgst3	Scarna10
	Vim	Gm16580
	Fam188a	Gm3531
	Itga8	Gm15662
	Pfkfb3	Gm5822
	Mastl	Gm10177
	Apbb1ip	Gm17416
	Lcn2	Gm9573
	Galnt5	Rps27
	Gbgt1	Gm17203
	Cytip	Gm17300
	Col5a1	Gm10722
	Ndufa8	Rpl6l
	Psmd14	Gm17214
	Ssna1	Gm10269
	Ly75	Gm7808
	Il1rn	Tma7
	Frzb	Gm4604
	Itga4	Gm9844
	Slc25a12	Hspa1a
	Dync1i2	1110038B12Rik
	Cybrd1	Gm24105
	Zfp385b	Gm24514
	Stk39	Snora24
	Lrp2	Rn7s6
	Ube2l6	Gm26461
	Mtx2	Gm23639
	Ola1	Rpph1
	Nop10	Mir5132
	Lpcat4	Snord8
	Commd9	Gm23153
	Fbn1	Gm22567
	Fgf7	Snora26
	Creb3l1	Snora15
	Map1a	Rpl41
	Snap23	Gm25939
	Chac1	Gm5117
	Spint1	n-R5s124
	Gfra4	Gm24497
	Adam33	Gm23472
	Gpcpd1	Hist1h2bl
	Rasgrp1	Gm11942
	Crls1	Gm24407
	Fahd2a	Gm23143
	Il1a	Snord16a
	Cpxm1	Gm25360
	Snph	Gm24871
	Fam110a	Gm25018
	Snta1	n-R5s194
	Zdbf2	Gm3699
	Atp9a	Rps19-ps2
	Car13	Rpl9-ps4
	Psma7	Gm10718
	Nkain4	Hist1h2bn
	Sla2	Gm5478
	Slc2a10	Gm21738
	Zmat3	Gm7618
	Ndufb5	Gm10243
	Ect2	Gm10719
	Ccna2	Gm24305
	Slc7a11	Gm26243
	Cog6	Gm25099
	Dclk1	Gm25313
	Tm4sf1	CAAA01147332.1
	Ssr3	Gm10717
	Wnt2b	Rnu5g
	Olfml3	n-R5s136
	Syt6	Gm10715
	Gstm4	Gm24265
	S100a11	Snord14c
	Npr1	Gm22513
	Fam198b	Gm11168
	Extl2	Rps19-ps1
	Cyp2u1	Gm25989
	Ccdc109b	Gm17535
	Sfrp2	Gm10736
	Snx7	Rps19-ps6
	Ppa2	Gm26512
	Ifi44	Gm26870
	Lamtor2	C430014B12Rik
	Apoa1bp	Gm26841
	Ctsk	Snhg4
	Bcar3	Gm9625
	Abca4	Gm26578
	Tmem56	Gm42418
	Dapp1	Gm3534
	Cryz	Mir6240
	Clca1	Gm27288
	Gbp3	Mir6236
	Gbp2	Rn7s1
	Pdlim5	Rn7s2
	Slc35a1	Gm8451
	3110043O21Rik	Gm28967
	Tmod1	Rps10-ps2
	Col15a1	Gm28872
	Brinp1	Gm6170
	Ptgr1	Gm29236
	Alad	Rps23-ps1
	Tmem261	Gm9320
	Slc44a1	Gm28437
	B4galt1	Eif4a-ps4
	Chmp5	Gm29216
	Epb41l4b	Hist1h3h
	Dctn3	Gm37108
	Stoml2	Rpl21-ps1
	Creb3	Gm8797
	Glipr2	Gstp-ps
	Hacd4	AC154540.1
	Dnajc6	Gm6394
	Itgb3bp	Gm43712
	Pdpn	AC156953.1
	Gpx7	Mir6516
	Tnfrsf1b	Gm44394
	Podn	AC121821.1
	Scp2	Gm44350
	Lrrc42	Gm44367
	Ppcs	Gm3511
	Mycbp	Gm44297
	Ndufs5	AC157822.1
	Gale	Gm43557
	Hmgcl	AC124457.1
	Fuca1	Gm43556
	Urod	AY036118
	Cmpk1	Rpl36a-ps2
	Akr7a5	AC157822.2
	Hspg2	Mir1843b
	Tinagl1	Gm44454
	Adgrb2	AC099934.1
	Csmd2	AC122546.1
	Slc30a2	Gm6204
	Extl1	Gm44383
	Sh3bgrl3	Gm44359
	Tekt2	Mir1843a
	Trappc3	Gm4332
	Sytl1	Gm44342
	Rspo1	Rn18s-rs5
	Sema3a	Gm44484
	Smpdl3b	AL626808.1
	Arhgef19	Rpl7a-ps7
	Acot7	AC099934.2
	Pgd	AC117240.1
	Park7	Gm43259
	Abcb8	Mir1291
	H6pd	Gm42822
	Angptl7	AC145392.1
	Prkcz	AC154296.1
	Mmp23	Rpl7-ps7
	Nadk	Gm9794
	Bst1	Gm42532
	Htra3	Gm20383
	Man2b2	2900060B14Rik
	Sgcb	Gm6210
	Emilin1	Gm19366
	Dpysl5	Gm44510
	Fam114a1	4930413G21Rik
	Srd5a3	Gm19514
	Gbp9	RP24-63G4.14
	Prkg2	Rps12-ps4
	Cxcl3	3110080E11Rik
	Cxcl1	Gm5905
	Shroom3	RP23-269H21.1
	Naaa	RP23-288C18.3
	Gm996
	Scarb2
	Stx2
	Mmp17
	Cit
	Acads
	Oasl2
	Plbd2
	Ndufa4
	Pomp
	Col1a2
	Limk1
	Eln
	Pcolce
	Pon3
	Plxna4
	Irf5
	Herc6
	Tmem176b
	Aoc1
	Slc23a4
	Ephb6
	Mrps33
	Anxa4
	Prok2
	Olr1
	Wnt5b
	Grin2b
	Arhgdib
	Rerg
	Rad18
	Scnn1a
	Psd3
	Rhpn2
	Pcsk6
	Ctsc
	Psmd8
	Mfge8
	Acan
	Me3
	Fah
	Ndufc2
	Cdipt
	Stard10
	Nupr1
	Rabep2
	Myh14
	Il4ra
	BC017158
	Slc5a2
	Itgam
	Nucb1
	Rgs10
	Gga2
	Vwa3a
	Tpp1
	Trim30a
	Dhx32
	Mki67
	Mrgprf
	Dock11
	Elf4
	Stk26
	Gpc4
	Slc9a9
	Prickle3
	Plp2
	Praf2
	Timm17b
	Slc38a5
	Heph
	Fgf16
	Itm2a
	Srpx2
	Pak3
	Glt28d2
	Gpm6b
	Zfp185
	Grpr
	Vegfd
	G6pdx
	Psmd10
	Gas6
	Rab11fip1
	Col4a1
	Col4a2
	Gpm6a
	Asb5
	Aga
	Dctd
	Hpgd
	Ufsp2
	Got2
	Nudt7
	Coq9
	Adgrg1
	Katnb1
	Kifc3
	Mvb12a
	6430548M08Rik
	Crispld2
	Hsbp1
	Ntpcr
	Ces2g
	Tradd
	Dus2
	Smpd3
	Bmper
	2310022B05Rik
	Trpc6
	Rexo2
	Fdx1
	2310030G06Rik
	Pts
	Plet1
	Mpzl2
	Cd3e
	Slc37a2
	Dpagt1
	Olfm2
	Ccnb2
	Anxa2
	Calml4
	Sh3bgrl2
	Nnmt
	Idh3a
	Thsd4
	Commd4
	Psma4
	Mpi
	Etfa
	Col12a1
	Loxl1
	Lrrc1
	Tmed3
	Plscr1
	Plscr2
	Car12
	Fam96a
	Ppib
	2300009A05Rik
	Me1
	Crtap
	Cmtm7
	Tgfbr2
	Ptgs2
	Nradd
	Lrrc2
	Ltf
	Ephb1
	Rab6b
	Trf
	Acpp
	Mst1r
	Slc25a20
	Klhdc8b
	Oas2
	Mansc1
	Ablim3
	Bet1
	Kap
	Ilvbl
	Smap2
	Ccdc85a
	Styk1
	Slc16a1
	Itgbl1
	Nup93
	Fkbp1a
	Cntnap3
	Triobp
	Apmap
	Atp1a1
	Card10
	Mgll
	Lpcat2
	Kctd17
	Ptprf
	Fbxl8
	Rtp4
	Palmd
	Frrs1
	Arhgap44
	Hacd3
	Qsox1
	Nrxn2
	Alg3
	Mrpl15
	Lgals3bp
	Gucy1a3
	Ndufb7
	Aspm
	Chchd4
	Loxl2
	Exosc4
	Jdp2
	Kif4
	Tkfc
	AI661453
	Gcsh
	Tmem30b
	Gbp8
	Cyb561a3
	Ifit1
	Six4
	Atp5h
	Chst11
	Dbn1
	Sema3f
	Fam171a2
	Fras1
	Grn
	Ttyh2
	Adgrb1
	Sirt6
	Pcdh11x
	Acot11
	Myl12b
	Fam151a
	Mrpl34
	Cobll1
	Tmem106a
	Dpp4
	Egln3
	Tubg1
	Arl6ip5
	Leprot
	Pdk3
	Eogt
	Hpse
	Ssc5d
	Gdpd5
	Ccl2
	Crb2
	Tmem98
	Sstr1
	Myo1d
	Ntng2
	Cep19
	Alg12
	Rnase1
	Cd276
	Chst4
	Dock4
	Fam214b
	Tmem63b
	Zfp57
	Sigmar1
	Myrf
	Mbnl3
	Fam110c
	Pdzrn4
	Ube2r2
	Fstl4
	Lrrn3
	Lzts1
	Arsi
	Lum
	Ppfibp2
	Sh3tc1
	Ndrg4
	Ttyh3
	Fgf1
	Cpz
	Alg5
	Ttll7
	Anln
	Rps27l
	Slitrk2
	Mrpl41
	Mrpl55
	Acaa2
	Rap2b
	Unc93b1
	Xpnpep2
	Wdr62
	Smpd1
	Prkcdbp
	Sh3glb1
	Scd1
	Selenof
	Ndufc1
	Fgf2
	Man1c1
	Paqr7
	Pafah2
	Endod1
	Kcnh3
	BC022687
	Tnfrsf23
	Kcnk2
	Cisd1
	Cpe
	Fgd3
	Card19
	Ninj1
	Ccdc92
	Igsf9
	Tigar
	Fkbp14
	Cdon
	Tmem181a
	Slc43a2
	F11r
	Hoxa7
	Hrc
	Mical2
	Sema7a
	Edem2
	Gmds
	Usp5
	Srcin1
	Tmem255b
	Nos1ap
	Sv2a
	C1rl
	Atp6v0a4
	Polr3k
	Pkhd1l1
	Ephx1
	Ost4
	Ctnnal1
	Gcnt1
	Baiap2l1
	Mrps34
	Bmp6
	Cpq
	Timm8b
	Arhgap18
	Ak5
	Adgrg6
	Il18
	Tbcd
	Tgfb2
	Lyplal1
	Lgi2
	Vstm2b
	Megf9
	BC017643
	Fut11
	Snx22
	Wfs1
	Dse
	Cyp7b1
	Ccser1
	Plekhg5
	Htatip2
	Orai2
	Galnt12
	Cercam
	2600006K01Rik
	Tbc1d2
	Arhgap29
	Mcph1
	Alg14
	Etfbkmt
	Ptger3
	Gpr176
	Abcc8
	Tax1bp3
	Gbp2b
	Ndufa4l2
	Ddx58
	Pex2
	Ppp1ca
	Spns2
	Sgms1
	Cfap69
	Xaf1
	Pitpnm3
	Tex2
	Gstm2
	Ildr2
	Ppip5k2
	Col16a1
	Ap1g2
	Cyp2s1
	Creg1
	Scamp5
	Zmynd15
	Begain
	Osbpl10
	Tmem205
	Npnt
	Irgq
	Ostc
	Ublcp1
	Rap1gap
	Shtn1
	Mdfic
	Serpina3g
	Mbp
	Ccdc64
	Ggact
	Pcca
	Slc39a11
	Coro2b
	Plekha6
	Tram2
	Abca9
	Lman1
	Wipi1
	Agrn
	Pigs
	Cmklr1
	Ammecr1
	Rabif
	Specc1
	Ctf1
	Ikbke
	Gjb5
	Lgalsl
	Fam83g
	Crtac1
	Dhrs7b
	Asb4
	Itpr3
	Atpaf2
	Map3k9
	Ttc9
	Dpm3
	Nmnat2
	Mrap2
	Gpr153
	Serpinb6b
	Greb1l
	Upk3b
	Tmem18
	Il17re
	Lrrn4
	Pyurf
	Hscb
	Adamts3
	Tmem221
	Adamtsl5
	Gm22
	Orai3
	Adgrd1
	Fmn1
	Foxo1
	Aqp5
	Nxpe4
	Il20rb
	Ctla2a
	Dsg2
	Sptssa
	N6amt1
	Rin3
	Swi5
	Pard6b
	Zbtb7c
	Gskip
	Tst
	Tubb2b
	1110012L19Rik
	Rtn4rl1
	Ddx28
	Krt14
	Glb1
	Sh3tc2
	Smtnl2
	Prr15
	Lrtm1
	Ccdc149
	Serpinb9
	Lyrm2
	Cradd
	Clec14a
	Tmem104
	Stard5
	Lrrc8d
	Tmem229b
	Nxph1
	Cd109
	Plaur
	Ccbe1
	Rbp1
	C77370
	C1qtnf2
	Cox17
	Bdh1
	Gjb4
	Slitrk4
	Nxph3
	Fam83h
	Atp10d
	Gpr1
	Nqo2
	Ptgs1
	Flrt2
	Gpr68
	Fam180a
	Lxn
	Flrt1
	A4galt
	Stbd1
	Col6a3
	Amigo2
	Syngr2
	Ankrd46
	Npy4r
	Omd
	Zbtb8b
	Fitm2
	Mlec
	Myof
	Vstm2a
	Efna5
	Ankrd34a
	Kmt5a
	Krt8
	Upk1b
	Tmem202
	Lingo1
	Orai1
	Lig4
	Fzd4
	Slc35c1
	Apol10b
	Nudt6
	D8Ertd82e
	C77080
	Tcf19
	Gm11868
	Prokr2
	Minos1
	Gpd1l
	Vamp8
	Pgbd5
	Tvp23a
	Sgms2
	Fam160a1
	Pddc1
	Hs3st1
	Fbll1
	Mb21d2
	Vtcn1
	Commd3
	Jagn1
	Gdf6
	1500011K16Rik
	Zfp52
	Ncald
	Six1
	Cd14
	Zfp579
	Sox6
	B3glct
	Xkr4
	Tagap1
	Pfdn4
	D630039A03Rik
	Foxo6
	Bre
	Plpp2
	Lrrc15
	Ezr
	Tmco1
	Atp6v1a
	Adam17
	Suclg1
	Oas1a
	C130026L21Rik
	Reep1
	Gas1
	Krcc1
	Cntn2
	Mapk11
	Aldh1a1
	Rab4b
	Nrgn
	Rxfp2
	Lgals7
	Gm9913
	B430305J03Rik
	Sh2d4a
	Slc39a8
	A930004D18Rik
	Spock3
	Ifi205
	Mrps21
	Atpif1
	Mettl7a1
	Ap1s3
	Lrrc8c
	Cadm4
	Usp46
	Nyap2
	Pdlim1
	Adh7
	Ano5
	Klhl25
	Cope
	Rras2
	Tmem150a
	Fez2
	Col8a2
	Pla2g4a
	Adgrf5
	Tmem154
	Rab31
	Ptprn2
	Usp13
	Fxyd3
	Slc44a2
	Musk
	Apol9a
	Yipf1
	Mrpl18
	Fam173a
	Lmcd1
	Megf6
	Ankrd29
	Bak1
	Sema3b
	Zfp809
	Sdhc
	Syt17
	Znrf2
	Gda
	2810428I15Rik
	Kcp
	Eno1b
	Ntrk3
	Slc27a4
	Ptk2b
	Ndufs8
	Adamts14
	Pcnx2
	Pyroxd2
	Kng2
	Samd5
	Tmem219
	Fam78b
	Mfap2
	Galnt13
	Haghl
	Cdh3
	Fam195b
	Cyp4f39
	Nol4l
	Tmem151a
	Smim20
	Cox5b
	Dpp6
	Suclg2
	Iah1
	Btbd3
	Opcml
	Nectin2
	Rpp25
	Serpinb2
	Lilrb4a
	Atp5g2
	Mtap
	Kdr
	Ufc1
	Mrpl42
	Msln
	Wscd2
	Eno1
	Sema3e
	Pcdhb5
	1700027J19Rik
	Dpp3
	Cadm2
	Gm4735
	Ano6
	Ifi27
	Pde6h
	mt-Tp
	Gm24357
	Gm23455
	Mir22
	Slc31a2
	Hmgn3
	Zfp810
	Hes6
	Pi15
	Pex26
	Apol9b
	Htra2
	Dok1
	Efcab1
	Psma5
	Cgn
	Hist1h3c
	Nkain2
	Psmb3
	Tmem100
	B3gnt9
	Fcho1
	Sp140
	Sp110
	Olfr558
	Serpinh1
	Mn1
	Zfp992
	Zfp804a
	Ndufb6
	Rasgrp3
	Nt5dc2
	1810009A15Rik
	Uqcc3
	Lrrn4cl
	Csf2rb
	Serpina1e
	Sod3
	Vamp5
	Uprt
	9130019P16Rik
	Wdfy1
	Apol7d
	Mxra8os
	Cdkn2b
	Mob3b
	Znhit6
	Zfp791
	Ehd2
	S100a16
	Lekr1
	BC029722
	Ctla2b
	Pak6
	Fibin
	Gal3st4
	Sf3b5
	Abracl
	Gm13212
	1110065P20Rik
	Vps25
	Tomm5
	Ifi27l2a
	Prnp
	Gm8818
	Tlr5
	Psme2
	Clec7a
	Nat6
	Ackr4
	B3gnt7
	Phyhd1
	6530402F18Rik
	Muc4
	Ulbp1
	Tmlhe
	Gm15264
	Slc48a1
	Btc
	Mir1903
	Gm15419
	1700060J05Rik
	Gm15958
	2310044K18Rik
	6330418K02Rik
	Gm16796
	Gm16083
	2810430I11Rik
	Gm13032
	Gm13293
	Wipf3
	Gm15829
	Gm16172
	Gm11747
	Gm13372
	Gm16272
	Plxna4os3
	E030013I19Rik
	B230206H07Rik
	4933431E20Rik
	D430001F17Rik
	Gm16062
	Gm15991
	Gm12999
	Gm13856
	Gm12945
	Gm16048
	Gm12426
	Gm13966
	1810012K08Rik
	C330006A16Rik
	Gm16564
	Cbx6
	Shkbp1
	Gm7097
	Timm10b
	E430024P14Rik
	Cfb
	Mndal
	1700071M16Rik
	Gm20425
	Gm17133
	5330438I03Rik
	Gm20538
	Lamtor3
	Gm6548
	Cox16
	A230065N10Rik
	Gm20441
	Gm20402
	2610524H06Rik
	Gm20547
	Mir5114
	Gm20659
	Rnasek
	Gm21451
	Gm14403
	Gm21954
	Itpripl2
	Gm21987
	Gm21983
	Rnaset2a
	Tpbgl
	Snhg18
	Gm2670
	Gm17501
	1010001N08Rik
	Gm26771
	Gm6634
	4933416M07Rik
	Gm16897
	Gm26631
	A130051J06Rik
	Gm4673
	Gm26776
	Gm26809
	Gm26810
	Gm26702
	Gm10605
	Gm10535
	Ptprv
	2310009A05Rik
	Mir1668
	Mir7678
	Mir6950
	Mir7010
	Mir6381
	Gm28154
	Gm29491
	Gm29371
	Gm19461
	9130401M01Rik
	Gm36569
	Gm38050
	Thap6
	Gm7694
	Gm38391
	Gm33051
	Gm42836
	Gm43106
	AC125167.1
	Gm43719
	Gm42609
	4930404A12Rik
	Gm43720
	Mir1892
	Gm42607
	Lhfpl3
	Gm43439
	AC122844.1
	Gm42846
	Gm20186
	Gm17130
	Mrpl33
	Gm43621
	Gm43808
	Gm43278
	Gm42557
	Gm45233
	Gm44250
	Gm44036
	Gm44085
	Gm44243
	Gm7932
	Gm44987
	Krt8-ps
	Gm19410
	Muc16
	Gm45667
	Gm45640
	RP23-248P8.2
	RP23-220F20.4
	B430319F04Rik
	RP23-220F20.2
	RP23-431O7.8
	RP23-284E19.10
	RP23-386F15.2
	RP23-187B11.7
