# Supplementary material
Source: Research Square preprint supplement (doi:10.21203/rs.3.rs-9812305/v1)
Supplement: Supplementary file 5 [file 407f26144c3714fc525f38eb.xlsx]

## Sheet: Sheet1
Table 13. Comparison of upregulated genes upon E2 in ER+ epithelial cells of uterus, vagina, and MG
Common genes in "Uterus epith.", "Vagina epith.", and "ER+LC"	Common genes in "Uterus epith.", and "ER+LC"	Common genes in "Vagina epith.", and "ER+LC"	Common genes in "Uterus epith.", and "Vagina epith."	Genes specifically upregulated in epith. Of uterus	Genes specifically upregulated in epith. Of vagina	Genes specifically upregulated in ER+LC
Crabp2	Mx1	Cdc45	Cox5a	Slc22a18	H19	Igsf5
Ccdc124	Wfdc18	Hddc2	Ckmt1	Slfn4	Cav2	Scnn1g
Pgam1	Scn4a	Galnt1	Pdgfb	Mid2	Zfp385a	Tpd52l1
Mlkl	Ppm1j	Uhrf1	Acp5	Trim25	Atp5f1	Alox12
Perp	Scin	Ube2c	Lamb1	Cdh4	Rpa1	Hk2
Arg1	Fkbp11	Cyp51	Ap1s1	Pparg	S100a4	Slc5a5
Mboat2	Il5ra	Foxm1	Ddx39	Gm2a	S100a6	Efnb2
Itgb4	Itga2	Spag5	Upk3bl	Chmp1a	Nhp2	Akr1b3
Krt6b	Ppdpf	Mcm2	Fbln1	Lgals9	Calm1	Ltbp1
Dsc2	Slpi	Kif20a	Clic1	Mxd1	Hars	Metrn
Ttc39c	Rab32	Fam162a	Gltp	Glmp	Cct3	Cd320
Padi3	Tmcc3	Stat5a	Hist1h2bc	Tspan33	Col18a1	Slc2a3
Padi4	Slc5a8	Spc25	Pde7b	Capns1	Kpnb1	Ier3
Lamc2	Unc5b	Mcm5	Actr2	Ssr4	Itga3	Bid
Gpd2	Stc2	Mthfd2	Aldh1l2	Rhoc	Tubb5	Hdac9
Knstrn	Sar1b	Cdc20	Fam20a	Mdp1	Ell2	Slc1a2
Bcar3	Krt19	Pole	Krt12	Dhrs1	Jup	Crbn
Mfsd2a	Papln	Dio2	Tmem14c	Ndufa11	Fkbp10	Ctr9
Gale	Sftpd	Tmem86a	Sema4d	Rgs19	Eef1e1	Apc
Padi2	Plau	Plcd1	Syk	Mien1	Sipa1l2	Ctns
Pgd	Ero1l	Kif11	Prelid1	Mea1	Ccne1	Shpk
Ssu72	Muc13	Pdzd11	Pdlim7	Adgre5	Celf2	Tuft1
Areg	Ovol1	Ncapg	Glrx	Prkar2b	Ppard	Eps8l1
Tuba8	Gsto1	Brca1	Mrpl36	Elf3	Dbf4	5430419D17Rik
G6pdx	Cbr2	Cdc6	Ppif	Ap1m2	Armc6	Susd2
Tmem266	Mrpl43	Tns4	Uchl3	Pld3	Snrpd1	Ggt1
Atp1b3	Fam20c	Birc5	Psmb5	Ncstn	Tgfb1	Pdk1
Mif	Ifi202b	Gdpd2	Tpi1	Dnase2a	Ggct	Slc5a6
Dhcr24	Lamb3	Cdk1	Hagh	Pde1c	Chaf1a	Gmnn
Tubg1	Lpcat4	Mtfr2	Uqcc2	Ctse	Tomm40	Syn2
Melk	Rprd1b	Nuak1	Celf4	Chn2	Hmgn2	Psen2
5031439G07Rik	Sh3d19	Hint1	Slc39a6	Mapk13	Phyhip	Trnt1
Gng12	Clca1	Nudcd2	Ehd1	Map2k1	Impdh1	Wdfy2
Tnfrsf23	Prom1	Hmmr	Ankrd22	Rasa4	Ercc1	Lama5
Ostc	Plac8	Pttg1	Pola2	Fxyd4	Homer3	Lcorl
Sprr2f	Aoc1	Prr11	Rps6ka4	Ndrg1	Syce2	Tenm1
Sec61b	Usp18	Sdc1	Xpnpep1	Plekha8	Coro1c	Cntnap1
Krt16	Furin	Rrm2	Slc16a3	Reep5	Cnn2	Med24
Tmprss11e	Myh14	Aspa	Urah	Ergic3	Rab11a	Gpx3
Gapdh	Dkkl1	Top2a	Slc16a14	Clint1	Nes	Anxa6
Chst8	Syt8	Diaph3	Bok	Atp6v1b2	Hdgf	Dhx40
Ldha	Ebp	Pbk	Mgst3	Nectin4	Cd44	Dnah11
Gm4735	Gsr	Esco2	Dhrs9	Cyba	Letm1	Mrpl45
Dusp22	Tmed3	Shcbp1	Rasgrp1	B4galnt1	Asf1b	P4ha2
Fam57a	Me1	Atad2	Mall	Sulf2	Ranbp1	Alox15
Tmprss11a	Oas3	Cd200	Fbln7	Slc44a4	Htra1	Aldh3a1
Sprr2a3	Acsl3	Tfrc	Fabp5	Atp1a2	Fblim1	Isyna1
Tmprss11g	Qsox1	Enah	Car2	Stx1a	Gcat	Wasf1
Gm12744	Igsf9b	Racgap1	Sla2	M6pr	Med8	Socs2
Gm13031	Fam110c	Msrb2	Tmem144	Crlf1	Srm	Slc1a4
1500002C15Rik	Rap2b	Cdca3	Lrat	Hmgcll1	Cdt1	Gabrp
	2210407C18Rik	Ndc80	Tmem56	Ap2s1	Aprt	Ccng1
	Tgm2	Dpy30	Uox	Fgfrl1	P3h4	Pdlim4
	Sh2d4b	Psat1	Ak4	Elk3	Psmd2	Limk2
	Fgd3	Incenp	Alpl	Arpc5	Lsm2	Snx13
	Arap2	Fen1	Sh3bgrl3	Rab25	Rad51c	Cmpk2
	Rapgefl1	Kif20b	Ereg	Lpo	Cav1	Rsad2
	Atg9b	Il33	Naaa	Tor2a	Fhl2	Ern1
	Stk32a	Cep55	Cyp3a13	Ick	Scrn3	Atp2a3
	Tax1bp3	Hells	Ahcyl2	Apol7a	Snrpb2	Fut8
	5730559C18Rik	Col17a1	Bhlhe41	Pigyl	Dynll1	Cdca7l
	Sgsm3	Bnc1	Bcat1	Slc5a1	Bcl2l13	Tgfb3
	Tnip3	Arhgap19	Tead4	Mogat1	Slc16a12	Esrrb
	Aqp5	Prim1	Pcsk6	Ptprs	Wnt3a	Irf4
	Hcar2	Col7a1	Tnni2	Fer1l4	Hyal2	Edn1
	Adrb2	Tyms	Plp2	Lypd8	Ifrd2	Tbc1d7
	A430105I19Rik	Nudt5	Efnb1	Pea15a	Nedd8	Gtf2h2
	Bst2	Lancl1	Trex2	Ehmt2	Cars	Emb
	Gprc5a	Sgol2a	Mfap3l	Chp1	Apip	Ngly1
	Cd24a	Il1r2	Sh3bgrl2	Tex261	Adssl1	Anxa8
	Bdnf	Bard1	Pkm	Zdhhc12	Ubxn11	Wnt5a
	Ctxn1	Cenpf	Nmnat3	Golga7	Tmem167	Khdrbs3
	Pls1	Nek2	Strc	Rnf5	Cad	Mtss1
	4930597O21Rik	Mcm10	Alg3	Cacfd1	Pten	Trp63
	B430305J03Rik	Nuf2	Atp2c2	Steap1	Timm23	Atp13a3
	Fam83e	Fam188a	Arhgap27	Aph1a	Cacybp	Gm9747
	Sytl5	Mastl	Chst11	Eps8	Cmc2	Lztr1
	Samd12	Dut	Eva1a	Camk1g	Naf1	Faim2
	1700027J19Rik	Nusap1	Fam124a	Ada	Actn1	Prkd3
	Nipal1	Knl1	Tmprss11b	Ctsa	Psma2	Grm8
	Slc4a11	Bub1	Mbnl3	Mlx	Anp32e	Tap2
	Gm14005	Nop56	Lzts1	Dhx58	Cnih1	Cabyr
	Btc	Snx5	Wnt4	Cyth4	Stard13	Pmaip1
	Gm15657	Tpx2	Prkcdbp	Ypel2	Slmo2	Sncaip
	Ccdc71l	Rbl1	Ankrd35	Slc2a4	Ube2a	Pcx
	Gm20412	Ect2	Trp53inp2	Cldn7	Lnx2	Gfra1
	Itpripl2	Ccna2	Higd1a	Mmp7	Ttll12	P4hb
	Gm1045	Cks1b	March4	Dusp14	Psmd3	Scd2
	Mir7678	Iqgap3	Alg14	Csf2	Slc12a4	Twnk
	A830008E24Rik	F3	Tex2	Natd1	Mybl2	Dgka
	Gm37539	Smc2	Ssr2	Atp6ap1	Uchl5	Cpeb1
	Gm7932	Kif2c	Lad1	Dnase1l1	Zcchc10	Podxl
	E230032D23Rik	Stil	Mapk6	Tmem160	Psmb6	Asnsd1
		Ak2	Ttc9	Atp6v1e1	Pfn1	Gpr39
		Stmn1	Dpy19l1	Etnppl	Kpna2	Lypd1
		Cdca8	Lor	Noxo1	Srsf1	Tmem163
		Cenpa	Mdga1	Calm3	Abi3	Rgs2
		Dck	Mab21l3	Gipc1	C1qbp	Tmem9
		Kntc1	Syt16	Trip10	Cenpv	Glul
		Cit	Sh2d5	Tmc4	Sparc	F5
		Mcm7	Gjb2	Frk	Slc25a39	Soat1
		Mad2l1	Rbp1	Fuca2	Atp5g3	Axdnd1
		Kif22	Kcnk6	Tnfaip3	Avpi1	Tmem141
		Il4ra	Bdh1	Smpdl3a	Rars	Neb
		Plk1	Elfn1	Mgat4c	Ywhah	Itgb6
		Rrm1	Trappc1	Myb	Plod1	Dapl1
		Mki67	Pkp3	Enpp3	Mdh2	Cers6
		Cenpi	Kcnn4	Ddit4	Chtf18	Snap25
		Mpp1	Tmem158	Nav3	Psmc3ip	Smox
		Eif4ebp1	Klhl5	Phlda1	Cops3	Fermt1
		Asb5	Map6	Hmg20b	Cops6	Mal
		Pgr	Ppp1r14b	4930404N11Rik	Arid3a	Samhd1
		Chek1	Capg	Fzr1	Krt10	Wisp2
		Ccnb2	Bak1	D10Wsu102e	Fbxo5	Syt6
		Kif23	Eno1b	Stk10	Rwdd1	Cyp2u1
		Mb21d1	Hist1h4i	Pfkl	P4ha1	Gatb
		Zwilch	Pgk1	Cpeb4	Snrpf	Bnipl
		Map4	Rps4l	Chac2	Ddx21	Cryz
		Slc16a1	Eno1	Tcn2	Ppa1	Coq3
		Nup93	Gpx1	Myo1g	Pno1	Epha7
		C330027C09Rik	Serpinb5	Polm	Srgap1	Tmeff1
		Afap1l1	Gng5	Dbnl	Snrpd3	Zfp618
		Aspm	Sprr2a2	Pik3cg	E2f7	Mycl
		Fancd2	Lrrc8b	Agr2	Csrp2	Zbtb8a
		Jdp2	Ly6a	Trib2	Timm13	Cpsf3l
		Kif4	Dio3	Fam84a	Llph	Slc34a2
		Trim59	Ass1	Slc26a4	Xpo1	Rufy3
		Brip1	Sprr2a1	Slc9a3r1	Cdc34	Bmp3
		Ncaph	Tmsb10	Llgl2	Prss57	Cxcl5
		Epgn	A830036E02Rik	Rflnb	Fstl3	Cxcl15
		Nup37	Arhgap27os2	Rph3al	Hnrnpab	Anxa3
		Pknox2	Gm12868	Pik3r5	Hspa4	Acads
		Greb1	Gm17711	Ntn1	Cnot6	Timp4
		Kif15	Gm26631	Tc2n	Cdkn2aipnl	Tacc2
		Anln	Gm3534	Otub2	Vdac1	Ptpn5
		Tacc3	C330022C24Rik	Akr1c21	Nipal4	Porcn
		Dtl	Gm44383	Akr1c13	Mrpl22	3830417A13Rik
		Nme1	Gm42547	Akr1c18	Myo19	Igbp1
		Ckap2	4930528J11Rik	Net1	Bcap29	Magt1
		H2afz	Gm3375	Numb	Mmp28	Glt28d2
		Ttk	Gm45213	Gng4	Mrc2	Tsc22d3
		Prc1	Gm45667	Trim27	Psmc5	Gpat4
		Timm8b	RP23-284E19.10	Ctsl	Psmd12	Ido1
		Slc7a5	RP23-228B2.3	Slc28a3	Txndc17	Hp
		Nup43	RP23-320D23.6	Golm1	Fam64a	Slc12a3
		Bub1b	RP23-187B11.7	Srd5a1	Tmigd1	Map1lc3b
		2810417H13Rik		Clptm1l	Nme2	Dpep3
		Ppp1r14c		Acot12	Lrrc59	Dus2
		Arhgap11a		Naip1	Aurkb	Taf1d
		Ccnb1		Polk	Stat5b	Abhd12
		Kif14		Iqgap2	Dcakd	D730048I06Rik
		Mcm3		Rnf180	Pole2	Tcf12
		Ncapg2		Parp8	Psma6	Thsd4
		Ammecr1		Oit1	Mthfd1	Rasgrf1
		S100a14		Fam213a	Sgpp1	Plscr4
		Clspn		Pnp	Hif1a	Mras
		Rbm20		Cacna2d3	Eif2s1	Abhd5
		Cenpe		Epsti1	Rdh12	Chsy1
		Mms22l		Lrp10	Erh	Trib3
		E2f8		Cideb	Psmc1	Folr2
		Cd109		Cmbl	Fdft1	Fanca
		Ticrr		Ank	Klc1	Galnt9
		Mis18bp1		Wnt7b	Tpmt	Armcx2
		Mlec		Fam83f	Id4	Myo5c
		Tmprss11f		Csnk1e	Cenpp	Pla2g4c
		Cdca2		Naga	Msx2	Slc26a2
		Ivl		Cyc1	Sfxn1	Zxdc
		Hist1h1a		Tsta3	Mxd3	Ifit1
		H2afx		Gsdmd	Pitx1	Ptpn13
		Bpifc		Ly6e	Cxcl14	Cxcl10
		Sprr1a		Psca	Slc25a48	Ccl5
		Gm42743		Arsa	2210016F16Rik	Plekhh3
		Mb21d2		Alcam	Trip13	Lzts2
		Ercc6l		Adgrg7	Ndufs6	Hacd2
		Bzw1		Sdf2l1	Smn1	Fmnl2
		Rnf7		Tnk2	Hmgcr	Mgat5
		Zfp52		Clcn2	Dhfr	9530077C05Rik
		Gpr87		Pdia5	Cenpk	Arhgap26
		Hist1h1d		Ehhadh	Rgs7bp	Ttll7
		Lgals7		Fam3b	Psmd6	Tmem71
		AU018091		Cbr3	Comtd1	Prr32
		Pard6g		Tmem50b	Dnajc9	Krt80
		Lig1		Ifngr2	Peli2	Itih2
		Dsg3		Gpd1	Eef1akmt1	Ttc13
		Idi1		Krt7	Ska3	Atp11b
		Espl1		Prr13	Mrpl57	Dlgap5
		Krt6a		Bsg	Esd	Esyt3
		Hist1h2bg		Serinc2	Bora	Iars
		Memo1		Ache	Pdlim2	Slc22a23
		Hist1h1b		Wfdc1	Slc7a8	Foxq1
		Krt4		Tmem176a	Oxct1	Dgki
		Fdps		Fam132a	Tgm1	Kif16b
		Cyp4f39		Pigx	Ripk3	Fam117a
		Hist1h2ab		Zfp54	Sema5a	Anpep
		Hist1h2af		Gtpbp2	Ctnnd2	Prune2
		Hist1h2ak		Clic5	Tars	Vstm2b
		Hist1h2bh		Slc37a1	Brix1	Tnfsf10
		Hist1h4k		Ndufv3	Ywhaz	Dusp10
		Gm24357		Lpin2	Fzd6	Ttc36
		Gm23455		Eif2ak2	Dcaf13	Kcne2
		Col4a4		Abca3	Pop1	Mrps6
		Hist1h4j		C3	Sqle	Tph1
		Hist1h3a		Tmem178	Mtbp	Milr1
		Hist1h4b		Psmb8	Mrpl13	Ranbp17
		Hist1h3b		Slc23a1	Fam49b	Gpr155
		Hist1h2ac		Cyp21a1	Gtse1	Agps
		Hist1h2ae		C2	Rangap1	Mgat3
		Hist1h3e		Tnf	Dscc1	Nmnat2
		Hist1h2bj		Aqp4	Tomm22	Trim72
		Hist1h3c		Lama3	Twf1	Trpv3
		Slfn9		Spry4	Nubp1	P2ry4
		Hist1h2ai		Mal2	Bop1	Defb1
		Hist2h3b		Ap3s1	Slurp1	Prkce
		Gas2l3		Lvrn	Mcm4	Ddx28
		4930558J22Rik		Rab27b	Cldnd1	Penk
		Hist1h2bb		Sec11c	Tmem45a	Teddm2
		Gm16485		Anxa1	Tfg	Igfals
		Gm15283		Pcsk5	Umps	Fam19a4
		Pcp4		Ostf1	Rfc4	Unc119b
		Hist1h2al		Lipo3	Psmg1	Pkd1l1
		Hist2h4		Cdc42bpg	Chaf1b	Lrrc75b
		Gm20628		Ppp2r5b	Gart	Ddit4l
		Hist1h2bl		Slc25a45	Mis18a	Tapt1
		Hist1h2bn		Coro1b	Krt75	Emc6
		Hist1h2bm		Rab1b	Cdkn1a	Smgc
		B230344G16Rik		Ehbp1l1	Akirin1	Dmbt1
		Hist1h3d		Prdx5	Rfc2	A4galt
		Hist1h3f		Esrra	Denr	Tmem229a
		Hist1h3h		Add3	Slc26a6	Col6a3
		Hist1h3i		Gsto2	Mrps23	Zbtb8b
		Gm42836		Casp7	Acat2	Pthlh
		Gm44350		Loxl4	Tnfrsf12a	Fam110b
		Gm44335		Cpn1	Adgrf4	Rasd1
		Gm44297		Abhd6	Sgol1	Klk6
		Gm44454		Flnb	Bysl	Lgals3
		Gm44323		Sat1	Ppil1	Krt78
		Hist2h2bb		Padi1	Cpne5	Fam160a1
		AI506816		Il23a	Xdh	Gm4847
		Gm44342		Pip4k2c	Hn1l	Kcnf1
		Gm44341		Avil	Polr2d	Ezr
		Gm44484		Paox	Kifc5b	Nrk
		Gm44492		Fuom	Stard4	Dpep2
		RP24-250L13.2		Prap1	Mrps18b	Iigp1
				Adam8	Lmnb1	Krt15
				Irf7	Fads3	Spcs3
				Taldo1	Fam111a	Mettl7a1
				Gusb	Carnmt1	Phactr1
				Tmc6	Ccdc86	Adh7
				Shisa5	Lipn	Fat2
				Ly96	Cdca5	Fut9
				Pgm2	Mrpl21	Alk
				4833439L19Rik	Eif1ad	Ghr
				Rdh10	Banf1	Abhd16b
				Gsta3	Cst6	Irs1
				Slco5a1	Papss2	Spock1
				Slc40a1	Stip1	Cep70
				Cflar	Maoa	BC043934
				Il18rap	Sfr1	Arhgap24
				2010300C02Rik	Alyref	Ryr3
				Mgat4a	Dus1l	Zfp53
				Plekhb2	Rfng	Ldoc1
				Ptpn18	Erlin1	Mex3b
				Inpp5d	Pa2g4	Chsy3
				Mlph	Shmt2	Rnf207
				Cfh	Hras	Tnfrsf19
				Sctr	Pidd1	Fam78b
				C4bp	Fgf14	Krt79
				Pigr	Cct8	Btbd3
				Slc45a3	Hprt	Tnfrsf11b
				Ncf2	Uqcrc1	Cntn4
				Pycr2	Plk4	Muc5b
				Ifi211	Thoc3	Krt77
				Lcn2	Lypla1	Zfp948
				Olfm1	Cops5	Flnc
				Dolpp1	Lactb2	Trp53i11
				Traf1	Hspd1	Psrc1
				Stom	Tex30	Ampd1
				Agpat2	Smap1	Cyp3a57
				Fcna	Wnt10a	Trabd2b
				Grin1	Cnot9	Spef2
				Lrrc26	Tuba4a	Nfxl1
				Il1rn	Psmd1	Acot1
				Il1f6	Ngef	Gm4951
				Il1f8	Actr3	Btbd19
				Galnt3	Mcm6	Gm10602
				Spint1	Nifk	Znhit6
				Adam33	Dbi	Adh1
				Slc27a2	Pkp1	Fat3
				Sppl2a	Fcamr	Pdzd7
				Il1a	Csrp1	Ccdc162
				Sdcbp2	Desi2	Selenos
				Pag1	Capn2	Nkain1
				Mrgbp	Tagln2	March10
				Acss2	Smyd2	Fam90a1a
				Rpn2	Irf6	Gm8818
				Slc33a1	Plxna2	Gm43302
				Dram2	Hsd17b7	Utp14b
				Ccdc109b	Psmb7	Aox2
				Snx7	Pfkfb3	Gm15821
				Ctso	Ak1	Gm15337
				Ifi44	Phf19	A830012C17Rik
				Efna4	Psmd14	Gm15336
				Gba	Fam166a	Gm15943
				Lamtor2	Nup35	Gm12349
				Pear1	Hat1	Agxt2
				Manba	Mtx2	Gm15810
				Dnase2b	Ola1	Slc5a3
				Clca3a2	Itga6	Gm9513
				Gbp3	Depdc7	A530084C06Rik
				Coro2a	Fbn1	F830016B08Rik
				Bspry	Duoxa1	Fam71a
				Zdhhc21	Hypk	Tnnc1
				Chmp5	Rad51	Ly6g6c
				Car9	Cdc25b	Gm23634
				Gba2	Pcna	Mir5114
				Rgp1	Bfsp1	Vmn1r39
				Plin2	Gins1	Gm2670
				2610528J11Rik	E2f1	Gm26694
				Slc5a9	Aurka	A430010J10Rik
				Laptm5	Car13	Gm19557
				Tnfrsf8	Ahcy	Gm27235
				Ephb2	Map1lc3a	0610031O16Rik
				Fuca1	Procr	Mir8114
				Akr1a1	Eif6	Gm28551
				Pik3r3	Dsn1	Gm37804
				Tspan1	1110008F13Rik	Gm37249
				Pdzk1ip1	Ctnnbl1	A430027C01Rik
				Cmpk1	Fam83d	Gm37660
				Pla2g2e	Pld1	Gm42620
				Cda	Exosc9	Gbp6
				Ddost	Nmd3	Gm43085
				Sema3a	4930579G24Rik	Gm44148
				Acot7	Ptgfrn	Gm44851
				H6pd	Gpsm2	Gm44944
				Arhgef16	Slc27a3	Gm14377
				Mmp23	Pmf1	Rnf223
				Nadk	Rwdd3	RP24-248F14.2
				Hgfac	Eif4e	RP24-286J21.7
				Man2b2	Depdc1a	RP23-184M4.3
				Sel1l3	Cth
				Gbp9	Rpf1
				Spp1	Ctbs
				Hsd17b11	Ccne2
				Cxcl3	Tstd3
				Cxcl1	Ndufaf4
				Ccng2	Ncbp1
				Rhof	Anp32b
				Arpc3	Txn1
				Oasl2	Rad23b
				Arpc1a	Aqp3
				Arpc1b	Stoml2
				Ndufa4	Tpm2
				Fam3c	Usp1
				Gnb2	Orc1
				Tmem176b	Cpt2
				Zc3hav1	Magoh
				Tmem213	Lrp8
				Slc23a4	Ndc1
				Trpv6	Ctps
				Gfpt1	Slc2a1
				Add2	Eif2b3
				Kbtbd8	Toe1
				Ret	Nasp
				Olr1	Mrto4
				Lrmp	Tinagl1
				Cmas	Tmem54
				Pglyrp1	Psmb2
				Rhpn2	Map7d1
				Cib1	Map3k6
				Ctsc	Rpa2
				Tmc5	Rcc1
				Cdipt	Taf12
				Aldoa	Psmc2
				Nupr1	Abcf2
				Dgat2	Vamp3
				Acer3	Slc2a5
				Itgam	Ctnnbip1
				Fbxl19	Fam126a
				Nucb1	Dnajc2
				Scnn1b	Mrpl20
				Trim30a	Sorcs2
				Dhx32	Ppm1g
				Tmem9b	Ugdh
				Slc6a14	Cdc7
				Xlr4c	Prkg2
				Car5b	Rfc5
				Zfp92	Cdk2ap1
				Psmd10	Abcb9
				Rnf128	Ran
				Aga	Psph
				Dusp4	Cct6a
				Plekha2	Aacs
				Slit2	Chek2
				Anxa10	Srsf9
				Tlr3	Psmg3
				Cbr4	Mad1l1
				N4bp1	Lfng
				Irx3	Actb
				B3gnt3	Fscn1
				Hsd17b2	Ung
				Tradd	Aimp2
				Pla2g15	Pdap1
				Smpd3	Polr1d
				Vstm5	Asns
				Egln1	Cald1
				St14	Gars
				Plet1	Hpgds
				Tmprss4	Slc37a3
				Nlrx1	Uba3
				C2cd2l	Ruvbl1
				Dpagt1	Cops7a
				Gcnt3	Plbd1
				Anxa2	Strap
				Fam46a	Dera
				Paqr5	Rad18
				Csk	Kras
				Ctsh	Ttll3
				Car12	Sec13
				Fam96a	Mrpl51
				Ltf	Rad51ap1
				Mst1r	Tspan9
				Oas2	Vasp
				Mansc1	Snrpa1
				Bmp8a	Mphosph10
				Kap	Blm
				Arap1	Rab38
				Polr2f	Psmd8
				Triobp	Psmc4
				Slc7a6os	Prss23os
				Atg9a	Ddias
				Card10	Anapc15
				Gstt2	Klk10
				Rtp4	Nsmce1
				Atp6v0b	Psma1
				Pik3c3	Adm
				Lgals3bp	Pycard
				Cfhr2	Rgs10
				Zdhhc15	Mrpl17
				Vav1	Praf2
				Tspan8	Msn
				Cipc	Pbdc1
				Agpat1	Cox7b
				Zdhhc14	Acsl4
				AI661453	Nsdhl
				Lif	Dusp9
				Tmem30b	Dkc1
				Gbp8	Morf4l2
				Mad2l1bp	Mak16
				Pof1b	Frg1
				Grn	Msmo1
				Adgrb1	Heatr3
				Unc13a	Gins3
				Mfsd12	Lsm6
				Mrpl34	Orc6
				Pip5k1c	Gpt2
				Tjp3	Cenpn
				Egln3	Tpm4
				Leprot	6430548M08Rik
				Pcyt1b	Cotl1
				Gdpd5	Ifi30
				Ptprh	Mphosph6
				Foxa1	Lsm4
				Cdcp1	Lpar2
				Capn5	Has3
				Pcdh17	Nip7
				Muc20	Ankrd49
				Ndufa3	Hephl1
				Kcnc2	Aars
				Isg15	Nectin1
				Krt20	Rexo2
				R3hdm4	Cadm1
				Cep19	Mpzl2
				Krt25	Fam81a
				Misp	Acsbg1
				Cox8a	Psma4
				Cd276	Isl2
				Fam214b	Tipin
				Slc2a6	Rbp2
				Gmip	Mrps22
				Slc18a1	Ptgs2
				Csgalnact1	Topbp1
				Sh3tc1	Traip
				Lgi4	Prkar2a
				Eepd1	Fhl3
				Mgat4b	Kank1
				Micall2	Mdfi
				Unc93b1	Ablim3
				Nfkbid	Ccdc88a
				Clca3b	Troap
				Inhbb	Lama1
				Lrg1	P2ry2
				Lrrc20	Fkbp1a
				Mycn	Duox1
				Galnt6	Noc4l
				Chst7	Pus7l
				Endod1	Reep4
				Gch1	Mnd1
				Cd81	Recql4
				Tspan14	Calm4
				Ankrd13b	Ppp3r1
				Ddx60	Rfc3
				Dnah10	Rxfp1
				Atp6v0a2	Cct2
				Igsf8	Chchd4
				Csf3	Polq
				Atp13a4	Zbed4
				Tlcd2	Smc4
				Bcl9	Csta1
				Lasp1	Pja1
				Pcp4l1	Gcsh
				Gmds	Myo5a
				Atp6v0a4	Ppp1r18
				Rassf7	Bmp2k
				Ctss	Xpot
				Lpar1	Asb16
				Nlrp6	BC030867
				Stap2	Lrr1
				Scgb1c1	Sidt2
				Rap1gap2	Arl4d
				Nipal2	Rrp12
				Slco4a1	1700020L24Rik
				Fam102a	Slc24a5
				Dap	Lsm7
				Nlrc4	Neu3
				1110008P14Rik	Mia2
				Metrnl	Parpbp
				Dcxr	Thyn1
				Wfs1	Fignl1
				Nrtn	Tgfbi
				Mocos	Krt17
				Tbc1d13	Grhpr
				Ncoa7	Polr3g
				Galnt12	Rnf126
				Ifi203	Apex1
				Bahd1	Sigmar1
				Scamp2	Ccdc38
				Slc25a24	Ska1
				Skiv2l	Qsox2
				Sec1	Nudt1
				Wdr47	Cenpt
				Spns2	Tmtc3
				Cblc	Aaas
				Cd79b	Cysrt1
				Bace2	Rps27l
				Apobec1	Ssx2ip
				Plekhg1	Dna2
				Apobec2	Neto2
				Scamp5	Trim17
				Ppp1r13l	Wdr62
				Crocc	Rbmxl1
				Pde9a	Tmprss13
				Otud3	Ndufc1
				Adgrf1	Grhl3
				Cftr	Tmem97
				Meis3	Sf3b6
				Arhgap32	Trmt6
				Mbp	Spon2
				Ccdc64	4930427A07Rik
				Slc39a11	Wdhd1
				Tmem45b	Ephx3
				Oasl1	Cdkn3
				Ptpre	Inf2
				Ankrd13a	Pcdh18
				Rnpep	Sirpa
				Sprr2i	Scarb1
				Sprr2d	Snn
				Sgsm1	Igsf9
				Lyn	Socs1
				Slc26a9	P3h2
				Specc1	Ttc39b
				Ikbke	Nop2
				C1galt1	Arl5c
				Tbc1d10b	Pmepa1
				Zc3h12a	Tfdp1
				Apobr	Rpf2
				Smg7	Atf5
				Muc1	Slc35f1
				D17H6S53E	Bud31
				Rhbdl2	Rccd1
				Pgp	Adrm1
				Unc5cl	Eme1
				Dmrta1	Psmd7
				Slc35g1	Fanci
				Il1f9	Adk
				Bcl2l15	Il18
				Krt84	Tgfb2
				Dsg2	Igfbp2
				Shisa2	Mreg
				2510039O18Rik	Prss23
				Rnf208	Dse
				Serpinb1a	Hs3st6
				Scml4	Exo1
				Tlr1	Polr2j
				Wdr72	Mcph1
				Borcs6	Phtf2
				Ifne	Timeless
				Wdr81	Gjb6
				Glb1	Gm9769
				Cdc42ep2	Cuzd1
				Basp1	Emp3
				Lrtm1	Sema3d
				Gvin1	Mars
				Tmem268	Ltb4r2
				C77370	Dnph1
				Fam46b	Mthfd1l
				Cdc42se1	Hmgn1
				Ppp1r3b	Cyp2s1
				Slc26a1	S100g
				Ankdd1b	Snrpd2
				1700001C19Rik	Pif1
				Cldn2	Elovl6
				Cldn4	Sox15
				Krt87	Slc7a1
				Tssk6	Cirh1a
				Fcgbp	Haus1
				Wbp1l	Wipi1
				Samd9l	Slc16a6
				Utf1	Mvk
				Ccdc88b	S100a10
				Selplg	Igsf3
				Ankrd46	Gm9774
				Amica1	Pm20d1
				Tprn	Stab1
				Atp13a5	Gjb5
				C1galt1c1	Dctpp1
				Prss32	Gm5436
				Bmyc	Notum
				Dtx3l	Fam89a
				Ap5b1	Tuba1c
				Orai1	Eif3j2
				Lig4	Psapl1
				Tmsb4x	E130012A19Rik
				Slc35c1	Fam25c
				Sprr2b	Gls2
				Ces2b	Krt13
				Kcnk12	Lsm8
				Dscam	Cdc25c
				Mrgprb2	Dsc1
				Mmp13	Ackr3
				Gpd1l	AY074887
				Vamp8	Uqcrq
				Trim15	Fzd5
				Ankrd37	Cenph
				Adgb	Krt14
				Hs3st1	Sh3tc2
				Nat2	Mfsd5
				Pcdh1	Pqlc3
				Vamp7	Sbsn
				Cd14	Sprr2g
				Otop1	Fam178b
				Rinl	Fam43a
				Plpp2	Gm7862
				Tbc1d30	Gjb4
				Slc39a1	Gm5424
				Mogat2	Hmga1
				B4galt3	Atp10d
				Tmem171	Fbl
				Oas1a	Ltb4r1
				Cyp2j6	Hist1h2be
				Glis3	Ptgs1
				Chmp3	Gap43
				Mapk11	Sfn
				Fes	Flrt2
				Zfand2a	Xxylt1
				Slc39a8	Fam132b
				1810037I17Rik	Arl4a
				Lrrc36	Dynlrb1
				Ceacam2	Nccrp1
				Ugt1a6a	Cd3eap
				Cadm4	Fancb
				Sprr2e	Cdca4
				Tmem245	Usp14
				Atp10b	Timm8a1
				Ano5	Tenm4
				1700034H15Rik	Gm4737
				Gm14137	Nat8l
				Cldn23	Gpr85
				Nod2	Bcl11b
				Clca3a1	Ckap2l
				S100a9	Tprg
				Trim34a	Gli2
				Ptafr	Sprr1b
				Nbeal2	Fam212b
				Fxyd3	Krt90
				Trim12c	Sephs2
				Apol9a	Oxtr
				Las1l	Gm8186
				Trim30d	Kmt5a
				Zfp809	Rarres1
				Serpina9	Aknad1
				Cxcl2	Ucn2
				Tmed9	Gal3st1
				Gda	Rpl36al
				Abi1	2810025M15Rik
				Cfi	Mrps16
				Fam57b	Gsg2
				Mfsd4a	Prokr2
				Tor4a	Atp5k
				Tmem40	Phospho1
				H2afj	Tvp23a
				Alox5ap	Gja1
				Cxcl17	Cited1
				Pyroxd2	Fam83a
				0610040J01Rik	Tmem199
				Gmfg	Gen1
				Slc4a4	Jagn1
				Spink12	Kif18b
				H2-K1	Arhgef39
				Tmprss11d	Rps19bp1
				Gdpd1	Hist1h1e
				Ppp1r1b	Gm5812
				Dgkk	Pfdn4
				Fabp4	Foxo6
				Clip2	Taf9
				Slc39a4	Cemip
				2010109I03Rik	2610001J05Rik
				Zbtb18	Sae1
				Chil4	Uba2
				Rnf183	9430076C15Rik
				Dpp3	Sv2b
				Pepd	Tarm1
				Scgb3a1	Phgdh
				Ifi27	Tll1
				Chil1	Krt42
				mt-Ts2	Tgm5
				Gm26226	Dusp7
				Mir31	Grwd1
				Kndc1	Skp2
				Serpina1a	Hmgb2
				6030419C18Rik	Lrrc8c
				Rnasel	Set
				Oas1g	Dsp
				Hes6	Slc6a2
				Khdc1a	Spink5
				Xlr4b	Gemin6
				Mkrn2os	Eif3b
				Agtr2	Cfl1
				Phf11d	Npm3
				Dok1	Pla2g4a
				Gm10238	Usp39
				Pnp2	Snrpg
				Fat1	Mrpl18
				Mpzl3	Lypd3
				Mesdc1	E2f6
				Cldn3	Fam136a
				Mrgprb3	Gsta2
				Ntn5	2011-09-01
				Gm4788	Adtrp
				Rnf186	Palld
				Serpina1d	Tpm3-rs7
				Serpina1b	Mrps14
				Naip5	Abce1
				1700086L19Rik	Dhcr7
				Zfp946	Gm12715
				Hpcal1	Eda
				2005-09-01	Cdh24
				Trim6	Nrm
				Slc39a2	Dbp
				Slfn2	Irak4
				Slfn10-ps	Dsc3
				9230020A06Rik	Hist1h4a
				Serpina1e	Serpinb6a
				Gpr27	Ppih
				Gm16401	Trmt61a
				9130019P16Rik	Dmkn
				Trim40	Irx1
				Gm8909	Prcp
				H2-D1	Phf5a
				Ifi204	Cox5b
				Ifi207	Krt5
				Cdkn2b	Wdr61
				Omp	U2af1
				BC030870	Armt1
				Gm10701	Dsg1b
				Bglap3	Gspt1
				Arhgap40	Cks2
				Ccl28	Zfp706
				Fndc10	Acat3
				B3galt5	Nsl1
				Tnk2os	Gm12751
				Gm11545	Hist1h2bk
				Mir686	Hikeshi
				Oxct2a	Gm10123
				F8a	Mrpl42
				Smim24	Tmed5
				Bnip3	Wscd2
				Gm4070	Nhp2l1
				1700024P16Rik	Jakmip1
				9530053A07Rik	Glyat
				Gm5155	Cycs
				Leng1	Gm6498
				Mon1b	Rpl7l1
				Naip6	Gm10143
				Naip2	Fbln2
				Serpina1c	Rab44
				Insl3	Gm5414
				Psme2	Ethe1
				Lemd1	Hhip
				Ifit1bl1	mt-Ta
				Gbp4	mt-Tn
				Muc4	mt-Tc
				2610203C22Rik	Gm12866
				Xlr4a	Cyp4a10
				Brms1	Hmgb1
				Gm14601	Bub3
				Gm11620	Gm3608
				Gm4875	Lyar
				Naip3	Gm7666
				Gm12352	Pcna-ps2
				Mir22hg	Lpar5
				Gm12841	Pi15
				Gm14023	Tcp1
				Gm12146	Cenpm
				Gm12223	Myadm
				Gm16090	Psma5
				Gm16325	Hist2h2ac
				Grin1os	Hist1h2bf
				Tnfsf13os	Hist1h4f
				Gm13032	Hist1h2ag
				1700003D09Rik	Hist1h2ah
				Gm16731	Hist1h2br
				Gm15929	Hist1h4n
				Gm12144	Hist1h2bp
				Gm16933	Hist1h2an
				AV064505	Dsg1a
				B430119L08Rik	Psmb3
				Gm15701	Spdl1
				Gm15482	Capza1
				Gm12147	Gm20634
				Skint6	Serpinh1
				Mroh3	Skint3
				Gm43213	Ptges3
				C430049B03Rik	Ccnb1ip1
				Gm15592	Hist1h2ad
				A230005M16Rik	Klrg2
				Gm15226	Nt5dc2
				Pet100	Fam189a2
				Gm16537	1810009A15Rik
				Ugt1a8	Gm94
				Gm15947	Ppia
				Shkbp1	Ccnf
				Tmem102	Oip5
				Ugt1a5	Myeov2
				Ugt1a1	Hspe1
				Gm16332	Apitd1
				Galnt4	Kti12
				Galnt6os	Mob3b
				Ugt1a7c	Gsta1
				Ugt1a6b	Krtdap
				Gm16285	Gramd2
				Ugt1a10	Ehd2
				Ugt1a2	S100a16
				Ugt1a9	Spc24
				4930503B20Rik	Mafb
				Ifi203-ps	Gm826
				Cfb	Fam83c
				Gm1965	Eif2s2
				Mndal	Ube2n
				Gm17077	Itpa
				BC035947	Pak6
				Gm8893	Ccdc58
				Gm9573	Amd1
				Hspa1b	Cenpw
				Gm8439	Krt76
				Gm17035	Aarsd1
				Gm6548	Mir675
				Gm17099	Selenoh
				H2-Q2	Capns2
				Peg10	Hmga1-rs1
				Bend4	Sf3b5
				Tnxa	Abracl
				Gm20528	Ndufaf8
				Gm20463	Tomt
				Cyp21a2-ps	Tomm5
				Gm20547	Rad54b
				Gm20481	Eif5a
				Gm5294	Prkcg
				Gm3336	Hist3h2a
				Gm8979	Ak6
				Rnaset2a	Gm9531
				Smim22	Col4a3
				Tmem181b-ps	Kifc1
				Gm26880	Ulbp1
				AU022754	Gm15487
				Gm26568	Gm7332
				Gm26877	Fzd10
				Gm26892	Snrpert
				Gm26697	Gm13577
				5830432E09Rik	Gm8822
				Gm26642	Gm11663
				Gm26850	1700064H15Rik
				Gm16938	Gm12696
				Gm26565	Gm11597
				Gm26602	Gm12743
				Gm26857	Gm14866
				Gm26577	1110046J04Rik
				Arl14	Gm16796
				2310009A05Rik	C230038L03Rik
				Mir1668	Gm9855
				Mir6418	Gm12356
				Mir7677	Gm2788
				Mir6978	4930483K19Rik
				Gm28592	Gm15856
				Plet1os	Gm15743
				Mrgprb9-ps	Gm12867
				Gm29200	2810408I11Rik
				Gm37233	Gm16062
				Gm38050	Gm16156
				Gm37939	1500009L16Rik
				Gm30414	Gm11940
				Gm37131	Gm2245
				Gm38316	Clec2f
				4930594C11Rik	Gm4524
				Gm37703	Teddm3
				Gm43057	Gm17122
				Gm43064	A730015C16Rik
				Gm44364	Snrpe
				Gm43305	Gm17134
				Gm43819	Gm17036
				Gm43240	Gm20390
				Gm42793	Aadacl2
				4930404A12Rik	Gm20538
				Gm43791	Tma7
				Gm42528	H60c
				Gm19719	Lsm5
				Gm43949	Hist2h3c1
				Gm44089	Hmgcs1
				Gm29848	Gm21967
				Gm44292	Gm21972
				Gm44751	Gm5478
				Gm31166	Gm21987
				Gm45507	Lbhd1
				Chmp1b	Gm26550
				Gm45397	Gm27029
				RP23-106I21.5	Gm16793
				Gm42031	4933408J17Rik
				RP24-420C18.1	Gm26666
				RP23-276M23.6	Gm26586
				RP23-187B11.10	2610020C07Rik
					Gm26752
					A330033J07Rik
					Gm26765
					Gm26643
					Gm26810
					Gm16894
					Sowahc
					Gm26984
					Mroh6
					Gm27786
					Gm27483
					Hist1h3g
					Gm28154
					Gm28760
					Gm29587
					9130401M01Rik
					Gm38058
					Gm37885
					Gm37347
					Gm4430
					Gm10129
					Gm37988
					Gm42835
					Gm44390
					Gm44394
					Mir5046
					AC147560.1
					AC117232.1
					Gm44367
					Gm42910
					Gm43738
					Gm44356
					Gm44486
					Gm44359
					Gm42538
					Gm44313
					AL603834.1
					Gm44346
					Gm44460
					Gm10459
					Gm42906
					Gm7993
					2010008C14Rik
					Gm43909
					Gm45205
					Gm44876
					Exosc6
					RP23-115O21.3
					RP23-430K5.3
					RP23-162P10.7
					RP24-389J11.1
