# Supplementary material
Source: Research Square preprint supplement (doi:10.21203/rs.3.rs-9812305/v1)
Supplement: Supplementary file 6 [file 5a87eb289d92d77228a16995.xlsx]

## Sheet: Sheet1
Table 9. Comparison of upregulated genes upon treatments in fibroblast cells of uterus
Common genes in "Up by E4low fibro.", "Up by E4Hi fibro." and "Up by E2 fibro."	Common genes in "Up by E2 fibro." and "Up by E4Hi fibro."	Common genes in "Up by E4low fibro." and "Up by E4Hi fibro."	Common genes in "Up by E4low fibro." and "Up by E2 fibro."	Genes specifically upregulated by E2	Genes specifically upregulated by E4low	Genes specifically upregulated by E4Hi
a	Abca9	Adam19	Ackr4	A4galt	Abca1	Ackr1
A2m	Abcb8	Adamtsl2	Adap2	Abca4	Acap3	Ackr3
Abcc3	Abcc8	Adgrb3	Agrn	Ablim3	Adam5	Actn3
Adam12	Abhd6	Angptl2	Arl6ip5	Abracl	Adamts15	Adam23
Adam17	Acaa2	Chst13	Baiap2l1	Acot7	Adamts7	Adamts19
Adamts14	Acads	Cilp	C2	Acpp	Adap2os	Adck1
Adamts2	Acan	Cnot8	Cadm4	Adam33	Agmo	Adora2a
Adamtsl5	Acot11	Col4a3	Chst11	Adgrb1	Aif1l	Adpgk
Adcy1	Acp5	Cyp2j6	Clec11a	Adgrb2	Aldh1l2	Akap2
Adcyap1	Acsl5	Dpt	Cyfip2	Adgrf4	Alox5ap	Ap5s1
Adgrd1	Adamts3	Efcc1	Gbp3	Adgrf5	Ank2	Apol6
Adgre5	Adcy2	Exoc3l4	Gbp9	Adgrg1	Antxr1	Arsa
Adh1	Adcy5	Fes	Gng12	Adgrg6	Arhgap24	Arsj
Adh7	Ahcy	Fndc1	Hacd4	Adgrg7	Aspa	B3galt1
Aebp1	Alad	Fndc5	Ifit1	Aim1	Aspg	Bdkrb1
Aga	Aldh18a1	Fnip2	Itga4	Akr1b3	Atp6v0b	Brinp3
Agt	Alg14	Gabrb2	Itga8	Akr7a5	Atp6v0d2	Ccdc124
Agtr2	Alg5	Gjc2	Itgbl1	Alcam	Atp8a1	Ccl28
Ak1	Angpt4	Gpc2	Lage3	Aldh3b1	Atrnl1	Ccrl2
Ak5	Ankrd46	Grk5	Lig4	Amigo2	B4galnt1	Cd248
Akr1c14	Ankrd55	Grm7	Man2b1	Ammecr1	Bcat1	Chpf2
Akr1cl	Ano6	Gsn	Mki67	Angptl7	Bgn	Chst15
Aldh1a1	Anxa1	Hsd3b7	Muc16	Ankrd29	Bmp3	Cisd3
Aldh1a2	Anxa2	Igsf10	Oas1a	Ankrd34a	C1qtnf3	Cnpy3
Alg12	Anxa6	Lrrc20	Oas2	Anxa4	Camk1g	Cntfr
Alg3	Anxa8	Lrrc32	Oasl2	Ap1s3	Camk2a	Coa3
Alpl	Ap1b1	Mxra8	Pkhd1l1	Apbb1ip	Catip	Coa5
Ampd3	Ap1g2	Myh10	Rnasek	Apoa1bp	Ccdc71l	Commd6
Angptl4	Ap1s1	Nrg1	Rsad2	Apol9a	Cerk	Comtd1
Anln	Apmap	P3h1	Rtp4	Apol9b	Cfl2	Cpa6
Ano5	Apol10b	Pcdha1	Samd5	Arhgap29	Chp2	Ctsd
Anxa3	Apol7a	Pcdha11	Sp100	Arhgap44	Chsy1	Ddah1
Aoc1	Apol7d	Pcdha2	Srcin1	Arhgef19	Clec1a	Dennd2a
Aoc3	Aqp5	Pcdha3	Tinagl1	Asb4	Clec3b	Dnm1
Ap2s1	Arg1	Pcdha4	Trim30a	Asb5	Cmtm3	Dock8
Ap3s1	Atp10d	Pcdha5	Trpc6	Asic2	Col11a1	Dusp14
Arhgap18	Atp5k	Pcdha6	Usp13	Aspm	Col14a1	Epdr1
Arhgdib	B3gat2	Pcdha7	Wdr62	Atp1a1	Col26a1	Gdnf
Arl5c	B3glct	Pcdha8	Zbp1	Atp1b1	Col6a5	Gngt2
Arsg	Bak1	Pcdha9		Atp5c1	Col6a6	Gpr173
Arsi	Bax	Pcdhac1		Atp5g2	Col7a1	Gpr63
Aspn	Bcar3	Pcdhb7		Atp5h	Col8a1	Gstt3
Atox1	Begain	Pcdhb9		Atp5j2	Crabp1	H1f0
Atp5e	Bet1	Phlda1		Atp5o	Crmp1	Htr2a
Atp6v0e	Bmp8a	Prex1		Atp6v0a4	Csgalnact1	Il13ra2
B3gnt9	Bpifc	Rnf144a		Atp6v1a	Ctgf	Kcnb1
Bace2	Bre	Rxfp3		Atp9a	Cthrc1	Kcnh1
Bmp1	Brinp1	Sec16b		Atpaf2	Cxcl5	Kcnv2
Bmp6	Bst1	Sema5b		Atpif1	Cxx1b	Krt87
Bmper	Btc	Slc26a7		B3gnt7	Cyp26b1	Lamb1
Bnc1	Cadm2	Slc29a3		B4galt1	Cyp4b1	Ldoc1l
Bst2	Calml4	Susd2		B4galt4	Dclk3	Lgi4
Btbd3	Capns1	Tnfaip2		B4galt5	Ddx39	Lnx2
C1qtnf1	Car13	Tnfaip3		Bcam	Dhrs3	Lrfn1
C1qtnf2	Card10	Wbscr17		Bdh1	Dio2	Lrp1
C1qtnf6	Card14	Zfp518b		Bop1	Dkk2	Lzts2
C3	Card19			Bsg	Dnah12	Malrd1
C4b	Casp8			C1rl	Dnase2a	Mfsd4b4
Cacna2d3	Cbx6			Cav1	Dnm3os	Mir702
Cacnb3	Ccdc149			Cbr2	Efna4	Mlycd
Car12	Ccdc85a			Ccbe1	Eng	Mmp2
Ccl11	Ccl3			Ccdc109b	Entpd2	Mocs1
Ccl2	Ccl6			Ccdc3	Eva1b	Mpv17l2
Ccl7	Ccser1			Ccdc64	Fcgr2b	Myadm
Ccl8	Cd14			Ccdc80	Flt3l	Ncoa7
Cd276	Cdipt			Ccdc92	Foxs1	Nipa1
Cd320	Cdk5rap3			Ccna2	Fstl3	Nsg1
Cd34	Cenpf			Ccnb2	Fut4	Ntf3
Cercam	Cfap54			Ccng1	Gabra3	Nudt19
Chmp6	Cfb			Cd109	Gabrb3	Olfml2b
Chn1	Chst4			Cd151	Galc	Osgin1
Cisd1	Chst8			Cd3e	Galk2	Pakap
Cldn15	Cib1			Cdh23	Gbp6	Pde10a
Clvs2	Clec14a			Cdh3	Gria2	Phf24
Cmklr1	Clic1			Cdk1	Gucy1b3	Pigk
Cmpk1	Cln5			Cdkn2b	H2-K2	Pigt
Cnpy2	Clptm1l			Cdon	H2-T22	Pik3ap1
Col12a1	Cmah			Celsr1	H2-T23	Plscr4
Col15a1	Cmtm7			Cep19	H2-T24	Pm20d1
Col1a1	Cnih1			Ces2g	Hc	Prkcg
Col1a2	Cntn1			Cfap69	Higd1b	Prr5
Col24a1	Cntn2			Cgn	Hmcn2	Prrx2
Col3a1	Cobl			Chac1	Hrh1	Ptges
Col4a1	Cog6			Chchd4	Hvcn1	Rab15
Col4a2	Col16a1			Chmp5	Icam2	Rcn3
Col4a4	Copz2			Cit	Ifit2	Reln
Col5a1	Cox6a1			Clca1	Ifit3	Rgag1
Col5a2	Cpe			Clcn4	Ifit3b	Rnf145
Col5a3	Cpt1c			Clec7a	Igfbp5	Rps4l
Col6a1	Cradd			Cln8	Il17ra	Rubcnl
Col6a2	Crip1			Clu	Isg15	Selenbp1
Col6a3	Cs			Cntnap3	Itga10	Shank1
Col6a4	Csad			Cobll1	Itih5	Slc16a14
Col8a2	Csf1			Commd4	Kdelr3	Slc39a4
Colgalt2	Ctsb			Commd9	Lpin3	Slc41a3
Commd3	Cxcl3			Comt	Lrig1	Slc43a3
Coq9	Cyb5r3			Cope	Manba	Slitrk3
Coro2b	Cybb			Cops6	Matn4	Smarcd3
Cox6b1	Cyp2u1			Cox16	Med12l	Sppl2b
Cpq	Cyp4f18			Cox17	Mfap4	Sprn
Cpxm1	Cyp7b1			Cox5a	Mfap5	Thbs3
Cpz	Cytip			Cox5b	Mgam	Themis2
Creb3l1	Dapp1			Cox7b	Mir5125	Tlr3
Crispld2	Dbnl			Cplx2	Mmp11	Tnfaip6
Crtac1	Dcakd			Crb2	Ms4a4d	Tnxb
Crtap	Dclk1			Creb3	mt-Ti	Trpc5
Cryab	Dctn3			Creg1	Mx2	Ugt1a1
Cryz	Ddt			Crip2	Myo10	Ugt1a10
Csmd2	Ddx4			Crls1	Nectin1	Ugt1a2
Ctsc	Dhx32			Csf1r	Nespas	Ugt1a5
Ctsh	Dnajc15			Csf2rb	Nid1	Ugt1a6a
Ctsk	Dok1			Csrp2	Nkain1	Ugt1a6b
Cxcl1	Dpagt1			Cstb	Nkain3	Ugt1a7c
Cxcl16	Dsc2			Ctf1	Nox4	Ugt1a8
Cxcl2	Dus2			Ctla2a	Npdc1	Ugt1a9
Cyb5a	Dusp3			Ctla2b	Nrtn	Unc5c
Cybrd1	Ecel1			Ctnnal1	Ntrk1	Unc5d
Dbn1	Echs1			Cxadr	Oaf	Usp46os2
Dbpht2	Efcab1			Cyb561a3	Olfml1	Vcan
Dcbld2	Ehd2			Cyp2s1	Olfr78	Zbtb7b
Ddx58	Elf4			Cyp4f39	P2rx4	Zcchc16
Dhrs1	Elk3			Dab2	Pamr1	Zfp385a
Dhrs4	Elovl1			Dctd	Pcdh12	Zfp618
Dhrs9	Emb			Ddit4l	Pcdha12
Dhx58	Emilin2			Ddr1	Pcdhac2
Dock4	Eml2			Ddx28	Pcdhb10
Dpep1	Emp3			Desi2	Pcdhb11
Dpp3	Eno1b			Dhrs7b	Pcdhb12
Dpp4	Entpd5			Diaph3	Pcdhb2
Dpp6	Ephx2			Dnajc6	Pde1b
Draxin	Eps8l2			Dock11	Pdgfrb
Drp2	Erap1			Dpm3	Pdgfrl
Dscam	Ereg			Dpysl5	Pigc
Dse	Esd			Dsg2	Plac8
E2f3	Etfa			Dusp6	Plcxd2
Ece2	Extl2			Dync1i2	Plekha2
Ecm1	F5			Eci1	Plvap
Edem2	Fah			Ect2	Plxdc1
Ehd1	Fbll1			Efna5	Plxdc2
Eif2ak2	Fbxl8			Efr3b	Ppp2r2c
Eln	Fcho1			Egfl6	Prkcb
Emilin1	Fez2			Egln3	Procr
Epas1	Fgd3			Elmo3	Ptp4a3
Ephb1	Fis1			Elovl7	Rasl12
Ephx1	Fkbp1a			Emc2	Rgs4
Eva1a	Fn1			Emc9	Rgs5
Fahd2a	Folr1			Endod1	Rhod
Fap	Foxo1			Eno1	Rnf135
Fbln2	Frrs1			Eogt	Rnf213
Fbln5	Fstl4			Epb41l4a	Robo2
Fbn1	Fxyd3			Epb41l4b	Rps3a2
Fbn2	Fxyd5			Epha2	Rps3a3
Fbxw17	G6pdx			Ephb6	Saa3
Fcgbp	Galnt5			Esam	Sbk1
Fgf12	Gata4			Etfb	Scn4a
Fgf2	Gata5			Etfbkmt	Scnn1b
Fgf7	Gata6			Exosc4	Sdc1
Fibin	Gdf6			Extl1	Serpinf1
Fkbp10	Gdpd5			Ezr	Sh3bp5
Fkbp11	Gja1			F11r	Slc15a2
Fkbp14	Gjb5			Farp1	Slc16a2
Fkbp7	Glb1l			Fars2	Slc17a5
Flrt2	Glipr2			Fdx1	Slc38a7
Fmn1	Gmds			Fgf1	Slc40a1
Fras1	Golm1			Fgf16	Slc7a2
Frk	Gpr39			Fgf9	Slfn5
Frzb	Gpr68			Fh1	Slfn5os
Fstl1	Gpx1			Fitm2	Slx4ip
Fuca1	Gramd1b			Flnb	Sncaip
Fuca2	Greb1l			Flrt1	Sorcs1
Fut11	Gria1			Foxo6	Srpx
Gal3st4	Gria3			Fuom	Svep1
Galnt13	Grin2b			Fut8	Sytl5
Gas6	Gstm2			Fzd4	Tlcd2
Gbgt1	Gstm4			Gale	Tlr12
Gda	Gstm5			Galnt12	Tmeff1
Gdpd2	Gusb			Gas1	Tnfrsf21
Gfra1	Haghl			Gata3	Tnfrsf26
Gga2	Higd2a			Gbp2	Tnxa
Ggt5	Hmgn3			Gbp2b	Tril
Gjb2	Hoxc8			Gbp8	Trim34a
Glb1	Htatip2			Gcnt1	Trim5
Glmp	Hunk			Gcsh	Trpc3
Got1	Hyal1			Gfra4	Tslp
Gpam	Igf1			Ggact	Ubtd1
Gpcpd1	Igfbp6			Gjb4	Usp18
Gpm6a	Il13ra1			Glt28d2	Vangl2
Gpm6b	Il17re			Gng4	Vgll3
Gpr137	Il1a			Got2	Vnn1
Gpr153	Il1rl1			Gpaa1	Vtn
Gpr83	Il1rn			Gpc4	Wdr66
Gpsm3	Il4ra			Gpd1l	Zim1
Gpx3	Ilvbl			Gpr1
Gpx7	Isoc1			Gpr176
Gpx8	Itga2			Grpr
Greb1	Itgam			Gsdmd
Grem2	Itgb3bp			Gskip
Grn	Itpr3			Gtf3a
Gyg	Itpripl2			Gucy1a3
H2afj	Jdp2			Herc6
H6pd	Kctd17			Hint1
Hacd3	Kdr			Hist1h3b
Heph	Klhl25			Hist1h3c
Hes6	Klk1			Hist1h3d
Hexa	Kmt5a			Hmgcl
Hist1h2bc	Lactb2			Hmmr
Hmg20b	Lamc1			Hn1l
Hmox1	Lamtor2			Hoxa7
Hpgd	Lamtor4			Hoxb6
Hps1	Laptm4b			Hoxc6
Hpse	Lcp1			Hs3st1
Hrc	Lgals7			Hsbp1
Hsd11b2	Lhfpl3			Hscb
Hspg2	Lif			Hspa12a
Htra1	Lilrb4a			Hspa4
Htra3	Limk1			Hspb7
Idh1	Lingo1			Htra2
Ifi205	Lman1			Iah1
Ifi27l2a	Loxl3			Idh3a
Ifi44	Lrp10			Ifi211
Ifngr2	Lrp11			Ifi27
Ikbke	Lrrc10b			Ift43
Il31ra	Lrrc8d			Igsf9
Il3ra	Ly6h			Il10
Inhbb	Lynx1			Il16
Irgq	Lypd1			Il18
Itgb3	Lypla1			Il18r1
Itgb5	Lyrm2			Il20rb
Itm2a	Lzts1			Ildr2
Kcnd1	Maged2			Irf5
Kcnk2	Man2b2			Itga3
Kcp	Map1a			Itga7
Kdelc1	Mb21d2			Jagn1
Klhdc8b	Mboat1			Jph4
Kng2	Mcph1			Kap
Krt19	Mdfic			Katnb1
Krt7	Me1			Kcnh3
Lbp	Megf9			Kif1c
Lcn2	Mesdc1			Kif26b
Leprot	Mlec			Kif4
Lgals3	Mlst8			Kifc3
Lgals3bp	Mmd			Krcc1
Lgi2	Mmp17			Krt14
Lgmn	Mrpl18			Krt18
Lgr6	Mrpl33			Krt8
Lhfpl2	Mrpl42			Krt8-ps
Lipa	Mrps16			Lama5
Lox	Msx1			Lamc2
Loxl1	Mtss1			Lamtor3
Loxl2	Mvb12a			Larp1b
Lpcat4	Myeov2			Lekr1
Lpl	Myh14			Lgals2
Lrat	Myof			Lgalsl
Lrp2	N6amt1			Lmcd1
Lrrc15	Naaa			Lpcat2
Lrrn3	Nadk			Lrrc1
Lrrn4	Nat6			Lrrc2
Ltf	Ndufa1			Lrrc42
Lum	Ndufa4			Lrrc8c
Lvrn	Ndufa8			Lrrn4cl
Lxn	Ndufc2			Lrtm1
Ly6a	Ndufs6			Lsr
Ly6c1	Ndufs8			Ltbp2
Ly6e	Ndufv3			Ltbp3
Lyplal1	Nfasc			Ly75
Man1c1	Ninj1			Ly96
Mast2	Nmnat2			Mansc1
Mastl	Nol4l			Map2k1
Mdp1	Nova1			Map3k5
Me3	Npc1			Map3k9
Mettl7a1	Nppc			Mapk11
Mfap2	Npy4r			Mapk12
Mfge8	Nqo2			Mbnl3
Mgst3	Nradd			Mbp
Mif4gd	Nrp1			Mcts1
Mir1668	Nt5c			Mdh1
Mir1892	Ntng2			Me2
Mir1903	Ntpcr			Med11
Mir5114	Ntrk3			Megf6
Mir6950	Nubp1			Met
Mlkl	Nudt7			Mgll
Mlph	Nxn			Mgst1
Mmp23	Nxnl2			Mical2
Mndal	Ogdh			Minos1
Mrc2	Orai2			Mir22
Mrgprf	Ost4			Mir6381
Mrpl34	Ostf1			Mir7010
Mrpl36	P3h4			Mir7678
Mrps21	Pak3			Mitd1
Msln	Paqr7			Mn1
Msrb2	Pcca			Mob3b
Mst1r	Pclo			Mpc1
Mtcl1	Pcsk5			Mpi
mt-Tp	Pcsk6			Mpp2
Muc4	Pddc1			Mpzl2
Mug1	Pde6h			Mrap2
Mxra8os	Pdzrn4			Mri1
Myl4	Perp			Mrpl15
Myo18b	Pex2			Mrpl2
Myo5b	Pex26			Mrpl32
Myrf	Pfn1			Mrpl40
Myrip	Pgd			Mrpl41
Naglu	Pgm2			Mrpl55
Natd1	Phyhip			Mrps33
Nav3	Pitpnm3			Mrps34
Ncald	Plet1			Mtap
Ncapg	Plet1os			mt-Rnr1
Ndrg4	Plp2			Mtx2
Ndufa3	Plpp2			Musk
Ndufa4l2	Plscr1			Mycbp
Ngfr	Plscr2			Myl12b
Nol3	Plscr3			Myl7
Nrk	Plxna4			Myo1c
Nt5dc2	Plxna4os3			Myo1d
Nucb1	Pofut2			Naa38
Nudcd2	Polm			Ncf2
Nudt6	Polr3k			Ndufa11
Nupr1	Ppdpf			Ndufa12
Nxpe4	Ppib			Ndufa2
Ogn	Prdx3			Ndufa7
Olfml3	Prelid1			Ndufb3
Olr1	Prkcdbp			Ndufb4
Omd	Prkd3			Ndufb5
Opcml	Prok2			Ndufb6
Oxtr	Prokr2			Ndufb7
P2ry14	Prpf19			Ndufb9
P4ha3	Prr15			Ndufc1
Padi1	Psd3			Ndufs5
Padi2	Psmb5			Ndufv2
Pafah2	Psmd10			Nectin2
Papln	Psmd8			Nedd8
Parp3	Ptgr1			Nfib
Pcdh11x	Ptprs			Nfkbid
Pcdhb5	Pyurf			Nkain2
Pcnx2	Rab27b			Nkain4
Pcolce	Rab3d			Nme2
Pdia5	Rab4b			Nme7
Pdzd11	Rab6b			Nnmt
Pgbd5	Rabep2			Nop10
Pgf	Rabif			Nos1ap
Pgls	Rad18			Npnt
Pgr	Rap1gap			Npr1
Phf21b	Rbm47			Nrgn
Phyhd1	Rcor2			Nrxn2
Pi15	Rdh14			Nup93
Pigr	Reep5			Nxph1
Pigs	Rerg			Nxph3
Pigx	Retnlg			Nyap2
Pla1a	Rgs10			Ola1
Pla2g7	Rgs19			Olfm2
Plau	Rhbdf2			Olfr558
Plbd2	Rin1			Orai1
Pld3	Rpp25			Orai3
Plekha6	Rps6ka4			Osbpl10
Plod1	Ryr2			Ostc
Plod2	S100a10			Pak6
Pmepa1	S100a11			Palmd
Pomt1	S100a16			Pank3
Pon3	S100a4			Papss2
Ppfibp1	S100a6			Pard6b
Ppic	Sardh			Park7
Ppp1r14b	Scarb2			Pcx
Ppp2r5b	Scd1			Pdia4
Praf2	Sdf2l1			Pdk3
Prlr	Sdhb			Pdlim1
Prr13	Sdhc			Pdlim4
Prss23	Selenof			Pdlim5
Prss23os	Sema3a			Pdpn
Psma5	Serpina3g			Pet100
Ptgdr2	Serpinb2			Pfdn4
Ptgis	Serpinb9			Pfkfb3
Ptpn5	Sf3b5			Pigyl
Ptprv	Sfxn1			Pla2g4a
Pts	Sfxn3			Plaur
Pxdn	Sgcb			Pld2
Pyroxd2	Sgms2			Plekhb2
Qpct	Sh3bgrl3			Plekhg5
Qsox1	Sh3glb1			Plpp1
Rab31	Sigmar1			Podn
Raly	Sirt6			Pold4
Ramp2	Six1			Polr2i
Ramp3	Slc16a6			Pomp
Rbp1	Slc25a1			Ppa2
Rexo2	Slc25a12			Ppcs
Rgs3	Slc25a35			Ppfibp2
Rhobtb1	Slc25a39			Ppil1
Rin3	Slc2a10			Ppip5k2
Ripk3	Slc30a2			Ppp1ca
Rspo1	Slc35b4			Ppp2r2b
Rxfp2	Slc35c2			Prap1
S100a1	Slc38a5			Prdx5
S100g	Slc44a1			Prg4
S1pr1	Slc45a3			Prickle3
Scamp5	Slc6a4			Prkcz
Scarf2	Slpi			Prkg2
Scd2	Smap1			Prnp
Scn1b	Smdt1			Prps2
Scrn1	Smim20			Psat1
Sdk1	Smpd3			Psma4
Sec61b	Snap23			Psma7
Sema3b	Snta1			Psmb3
Sema3f	Socs2			Psmd13
Serf1	Srd5a3			Psmd14
Serpinb6b	Ssr3			Psme1
Serpinb8	Ssr4			Psme2
Serping1	Sstr1			Ptger3
Serpinh1	St3gal1			Ptgs1
Sfrp4	St3gal5			Ptgs2
Sgsh	St3gal6			Ptk2b
Sh3tc2	Stambpl1			Ptprc
Shisa4	Stard10			Ptprf
Shisa5	Steap1			Ptprn2
Shkbp1	Ston2			Ptprq
Six4	Stx2			Rab11fip1
Slc15a3	Stxbp2			Rab1b
Slc16a12	Suclg1			Rab40b
Slc37a2	Suclg2			Rap2b
Slc39a11	Sult5a1			Rapgef3
Slc43a2	Syk			Rars
Slc46a1	Syt17			Rasgrp1
Slc9a9	Syt6			Rasgrp3
Slco2a1	Tagap			Reep1
Slco5a1	Tagap1			Rhbdl1
Slitrk4	Taldo1			Rhpn2
Smpd1	Tax1bp3			Rmnd5b
Snai2	Tbc1d7			Rnase1
Snhg18	Tbcd			Rnaset2a
Snx22	Tex2			Rpa3
Snx7	Tgfb1			Rpl22l1
Sod3	Tgfb2			Rps27l
Sox5	Tgfbr2			Rps6ka1
Sox5os1	Thsd4			Rras2
Sparc	Timm17b			Rtn4ip1
Specc1	Timp1			Rtn4rl1
Spns2	Tmco1			S100a13
Spock3	Tmeff2			Sbsn
Spon1	Tmlhe			Scand1
Spon2	Tmod1			Scg5
Sprr2f	Tnfrsf1b			Scnn1a
Spta1	Tpbgl			Scp2
Sptssa	Tpp1			Sdc4
Srgap1	Tradd			Sdhaf4
Srpx2	Trem2			Sdhd
Ssc5d	Triobp			Sema3e
Stmn4	Trpv4			Sema7a
Sulf2	Tsen15			Serinc2
Tcn2	Tspo			Serpina1e
Tenm4	Tst			Serpinb1a
Thbs2	Ttc39c			Sfrp2
Thbs4	Ttll1			Sgms1
Timm13	Ttll12			Sh2d4a
Tkfc	Tubg1			Sh3bgrl2
Tmed3	Tvp23a			Sh3tc1
Tnfaip8l3	Ube2r2			Shroom3
Tnfrsf23	Ublcp1			Shtn1
Tomm5	Ufc1			Sil1
Tpgs1	Ulbp1			Sla2
Trabd2b	Uprt			Slc11a1
Tram2	Uqcc2			Slc16a1
Trappc1	Uqcr11			Slc23a4
Trdn	Usp46			Slc25a20
Trf	Usp5			Slc27a4
Trp53inp2	Vash1			Slc31a2
Tspan17	Vdac1			Slc35a1
Ttyh3	Vps25			Slc35c1
Txndc15	Vstm2a			Slc39a8
Uck1	Vstm2b			Slc44a2
Umps	Wfs1			Slc48a1
Unc93b1	Wisp2			Slc4a3
Upk3b	Wnt5b			Slc5a2
Uqcr10	Zbtb8b			Slc6a14
Vamp8	Zfhx4			Slc7a11
Vcam1	Znhit1			Slc7a4
Vegfd	Znhit6			Slc9a3r1
Vim				Slco3a1
Vsir				Slitrk2
Vtcn1				Smap2
Wdfy1				Smpdl3b
Wipi1				Smtnl2
Wnt5a				Snph
Wscd2				Sox6
Xaf1				Sp110
Xdh				Sp140
Xpnpep1				Spcs1
Xpnpep2				Spint1
Zdhhc24				Spire2
Zfp57				Sprr1a
Zfp579				Ssna1
Zfp804a				Stard5
Zfp810				Stbd1
Zfpm2				Stc2
Zmat3				Steap2
Zmynd15				Stk26
				Stk39
				Stoml2
				Styk1
				Sv2a
				Swi5
				Sync
				Syngr2
				Sytl1
				Tbc1d2
				Tbcb
				Tcf19
				Tekt2
				Ten1
				Thap6
				Tiam1
				Tigar
				Timm10b
				Timm8b
				Tlr5
				Tm4sf1
				Tmc6
				Tnfrsf11a
				Tnfsf11
				Tnip1
				Top2a
				Traf3
				Trappc3
				Trpm6
				Ttc27
				Ttc9
				Ttll7
				Ttyh2
				Tubb2b
				Tuft1
				Txn1
				Ube2l6
				Uchl3
				Ufsp2
				Uhrf1
				Upk1b
				Uqcc3
				Uqcrb
				Urod
				Usmg5
				Vamp5
				Vwa3a
				Wipf3
				Wnt2b
				Wwc1
				Xkr4
				Yipf1
				Ypel2
				Zbtb7c
				Zdbf2
				Zfp185
				Zfp385b
				Zfp52
				Zfp791
				Zfp809
				Zfp992
				Znrf2
