# Supplementary material
Source: Research Square preprint supplement (doi:10.21203/rs.3.rs-9812305/v1)
Supplement: Supplementary file 7 [file 7afaaa98ca58cecbda3d3634.xlsx]

## Sheet: Sheet1
Table 4. Comparison of upregulated genes upon treatments in MG in ER- LC
Common genes in "Up by E4low ER-LC", "Up by E4Hi ER-LC" and "Up by E2 ER-LC"	Common genes in "Up by E2 ER-LC" and "Up by E4Hi ER-LC"	Common genes in "Up by E4low ER-LC" and "Up by E4Hi ER-LC"	Common genes in "Up by E4low ER-LC" and "Up by E2 ER-LC"	Genes specifically upregulated by E2	Genes specifically upregulated by E4low	Genes specifically upregulated by E4Hi
Areg	Aoc1	Sprr1a	Epgn	Adig	Anxa3	Pcp4
Cyp1b1	Cxcl15		F3	Anln	Aqp3	Ptpn5
Gpx3	Cyp24a1		Khdrbs3	Arhgap42	Armc4
Slc5a5	Greb1		Nipal1	Aspm	Asns
	Krt4			Brca1	Bcar1
	Tmprss11a			Brca2	Bid
				Bst2	Car2
				Btbd3	Chac1
				Btla	Cldn1
				Bub1	Cnih4
				Bub1b	Creld2
				Ccna2	Crls1
				Ccnb1	Csf1
				Cdc20	Csf3
				Cdc45	Cstb
				Cdc6	Cxcl1
				Cdca3	Cxcl2
				Cdk1	Cxcl5
				Cel	Cyr61
				Cenpe	Denr
				Cenpf	Depdc7
				Cep55	Dmkn
				Chaf1a	Edn1
				Clspn	Eef1e1
				Cmpk2	Eif4ebp1
				Col9a1	Fastkd5
				Csn1s2a	Fermt1
				Csn2	Gas2l3
				Cst3	Gch1
				Cxcl10	Herpud1
				Dhx58	Hivep2
				Diaph3	Hs3st1
				Dio2	Hyou1
				Duoxa1	Icam1
				E2f1	Ier3
				Ect2	Ifngr1
				Ercc6l	Il1rap
				Fen1	Itgb6
				Fkbp11	Klk10
				Gbp3	Klrg2
				Ggt1	Lif
				Hells	Liph
				Hist1h1a	Msmo1
				Hist1h2ab	Mthfd2
				Hist1h2af	Mybl1
				Hmmr	Myo5b
				Hp	Nars
				Ifi27l2a	Nes
				Ifi44	Neto2
				Ifit1	Ngf
				Ifit3	Nrg1
				Ifit3b	Pdia6
				Igtp	Phc2
				Il1r2	Plau
				Il33	Plaur
				Iqgap3	Pno1
				Irf7	Por
				Kif11	Ppp4r2
				Kif15	Prrg4
				Kif4	Prss22
				Knl1	Psat1
				Knstrn	Psg17
				Kntc1	Psg20
				Krt16	Rdh10
				Krt6a	Rps3a2
				Krt78	Rps3a3
				Lao1	Rrp15
				Lbp	S100a8
				Ldhb	Slc25a48
				Lect1	Slc4a11
				Mcm2	Slc6a14
				Mcm3	Slc7a1
				Mcm5	Slc7a5
				Mcm7	Smox
				Melk	Sod2
				Mgam	Stx11
				Mis18bp1	Tars
				Mki67	Tes
				Mlkl	Thbs1
				Mras	Tm4sf1
				Mx1	Tnfaip2
				Ncapg	Trib3
				Nrep	Trmt61a
				Nusap1	Trp53rka
				Oas1a	Trpm6
				Oas2	Ubox5
				Pbk	Uchl3
				Pcdh10	Vkorc1l1
				Penk	Wdr75
				Pfdn4	Zdhhc13
				Pgr	Zfp568
				Phactr1	Zmynd15
				Pole
				Qsox1
				Racgap1
				Rrm2
				Rsad2
				Rtp4
				Scube1
				Slc2a3
				Slc2a9
				Slc5a8
				Slfn9
				Sox4
				Spag5
				Spp1
				Stc1
				Stil
				Stmn1
				Syn2
				Tex2
				Top2a
				Tpx2
				Trabd2b
				Ube2c
				Uhrf1
				Usp18
				Wap
				Wfdc18
				Wfdc3
				Zfp367
