# Supplementary material
Source: Research Square preprint supplement (doi:10.21203/rs.3.rs-9812305/v1)
Supplement: Supplementary file 8 [file 8257e61d84d5b189eabe7088.xlsx]

## Sheet: Table 1 MG RNAseq dataset
Gene.ID	Gene.Name	LCR17_MG_LCERPlus_OVXPlusE4Hi	LCR18_MG_LCERm_OVXPlusE4Hi	LCR19_MG_BC_OVXPlusE4Hi	LCR9_MG_LCERPlus_OVX	LCR10_MG_LCERm_OVX	LCR11_MG_BC_OVX	LCR12_MG_LCERPlus_OVX	LCR13_MG_LCERm_OVX	LCR14_MG_BC_OVX	LCR23_MG_LCERPlus_OVXPlusE2	LCR24_MG_LCERm_OVXPlusE2	LCR25_MG_BC_OVXPlusE2	LCR26_MG_LCERPlus_OVXPlusE2	LCR27_MG_LCERm_OVXPlusE2	LCR28_MG_BC_OVXPlusE2	LCR37_MG_LCERPlus_OVXPlusE4low	LCR38_MG_LCERm_OVXPlusE4low	LCR39_MG_BC_OVXPlusE4low	LCR40_MG_LCERPlus_OVXPlusE4low	LCR41_MG_LCERm_OVXPlusE4low	LCR42_MG_BC_OVXPlusE4low	LCR51_MG_LCERPlus_OVXPlusE4Hi	LCR52_MG_LCERm_OVXPlusE4Hi	LCR53_MG_BC_OVXPlusE4Hi	LCR54_MG_LCERPlus_OVXPlusE4Hi	LCR55_MG_LCERm_OVXPlusE4Hi	LCR56_MG_BC_OVXPlusE4Hi
ENSMUSG00000000001	Gnai3	1249.95	1522.48	1256.35	1531.54	1723.42	1384.41	1078	1610.81	1421.43	2056.83	2057.63	1415.88	1294.27	1617.58	1148.42	1901.77	2177.77	1325.62	1544.06	2689.28	1363.29	1454.06	1464.18	1067.57	2242.82	3159.28	2362.91
ENSMUSG00000000028	Cdc45	70.3642	87.0439	47.5733	29.0427	36.1312	51.5344	24.1686	35.8371	40.7747	119.273	99.6621	53.0481	110.925	105.204	65.7782	40.8412	45.0873	56.3415	56.5734	46.8945	47.6353	65.6664	54.9682	37.5936	51.3035	66.9481	74.5739
ENSMUSG00000000031	H19	214.775	46.5701	619.847	147.578	70.0068	387.352	101.501	63.4101	350.759	98.6841	52.8893	272.185	175.716	67.0025	458.402	65.1268	34.6402	282.282	28.9298	22.1349	87.3612	331.945	144.997	173.592	95.554	23.8208	630.479
ENSMUSG00000000037	Scml2	68.2865	57.65	60.1017	39.8389	45.511	81.0107	50.2302	54.6526	63.8043	80.8307	60.4667	66.1568	56.1608	55.7704	55.4113	39.8454	26.9801	48.9091	34.6919	59.6676	56.9235	35.816	55.9455	59.7611	28.025	40.7121	49.7462
ENSMUSG00000000049	Apoh	23.8796	59.8474	42.6833	30.0549	55.3927	49.0386	24.1686	32.1145	46.9224	27.4083	46.1931	50.8441	27.9689	55.7704	38.4901	26.4273	48.1632	48.9091	33.5566	46.8945	55.8972	15.8406	46.1101	51.8806	31.7763	47.11	39.3343
ENSMUSG00000000056	Narf	149.454	107.538	168.158	107.832	90.6739	176.802	141.278	150.241	209.474	200.346	137.57	178.57	177.837	133.348	178.682	107.818	79.3068	167.384	147.003	90.4766	203.361	216.298	151.648	215.24	147.616	71.0795	131.168
ENSMUSG00000000058	Cav2	1327.29	518.085	1472.22	2016.32	586.671	1582.67	1786.71	967.563	1559.03	1642.92	669.622	1732.26	937.053	480.166	1173.63	2651.01	311.198	967.289	2827.28	634.71	1369.26	2489.08	450.981	1509.26	1187.15	585.088	940.304
ENSMUSG00000000078	Klf6	14986.3	11866.2	8367.73	13060.8	15416.1	9054.87	10940.8	13961.1	8347.96	32632.3	19368	9110.79	19722.4	16300.1	9067.03	27123.8	19459	7982.18	24813	20562.1	7157.96	18339.6	12671.1	4670.46	20098.5	23131.8	12410.8
ENSMUSG00000000085	Scmh1	574.24	336.551	502.575	540.36	367.516	760.005	595.503	384.611	698.389	587.655	288.486	728.923	506.855	274.672	551.229	506.067	272.006	501.399	489.311	287.259	632.295	593.849	353.494	586.834	458.254	188.257	451.363
ENSMUSG00000000088	Cox5a	626.147	465.769	415.072	485.58	294.205	262.522	541.618	411.854	333.253	1102.78	616.369	358.266	736.237	436.404	345.368	659.512	454.182	280.687	674.313	477.831	292.014	964.575	359.174	296.748	740.171	506.172	434.877
ENSMUSG00000000093	Tbx2	99.2628	38.6659	206.414	78.7676	57.4923	175.198	38.8828	37.673	119.33	33.6443	34.4492	132.728	32.7075	45.658	208.009	40.8412	33.5707	172.178	38.061	26.1856	136.496	29.7549	32.959	146.359	28.025	23.8208	97.9583
ENSMUSG00000000094	Tbx4	15.5658	13.7713	27.4417	9.93761	14.3493	27.4723	9.93761	13.3017	21.0038	9.93761	15.2244	20.3245	13.7495	14.0727	30.788	15.2849	9.93761	17.377	17.2759	15.9075	18.5208	13.8391	9.93761	32.0532	19.9208	13.6537	15.836
ENSMUSG00000000120	Ngfr	88.9727	28.1004	633.807	57.6615	44.0844	465.738	35.0106	44.0058	134.583	81.7728	30.3951	374.203	195.853	46.9317	536.095	35.8259	17.0031	299.82	18.7699	20.707	238.238	28.5101	22.0094	179.545	90.4933	28.5536	454.66
ENSMUSG00000000125	Wnt3	13.6667	18.9262	27.4417	15.1536	14.3493	13.1841	16.1572	21.1647	22.4783	15.2595	13.4515	13.7596	9.93761	14.0727	23.7935	9.93761	15.4339	17.377	13.7122	15.9075	13.6175	9.93761	13.5127	23.2588	9.93761	9.93761	13.8362
ENSMUSG00000000126	Wnt9a	54.6998	45.4506	145.737	68.7093	44.0844	340.951	77.2537	40.4025	406.769	32.6245	26.2037	136.998	41.8196	45.658	132.091	44.7961	24.682	157.794	43.5849	32.5214	206.352	29.7549	37.0752	184.646	61.632	43.9237	80.1586
ENSMUSG00000000127	Fer	367.591	247.866	363.865	375.102	233.08	419.348	287.677	246.638	412.603	466.969	235.169	378.452	455.051	238.166	352.434	354.455	213.186	345.248	319.844	188.502	389.554	402.39	214.267	390.925	301.382	220.7	327.15
ENSMUSG00000000131	Xpo6	1218.41	1353.85	1153.99	1278.38	1741.74	1278.08	1291.09	1219.42	898.985	1121.35	1151.6	1195.04	1112.5	1316.24	1207.93	1433.14	2104.37	1369.42	1318.58	1667.63	1277.77	1172.47	1374.31	1088.76	1377.28	1972.87	1757.63
ENSMUSG00000000134	Tfe3	368.61	462.565	508.159	523.298	619.233	508.124	527.249	526.764	434.77	366.685	474.042	362.516	414.872	568.895	538.113	467.701	585.371	582.642	366.639	639.192	492.034	388.082	568.316	579.202	585.043	795.508	567.848
ENSMUSG00000000142	Axin2	59.9452	34.0508	163.489	55.8092	34.6587	149.52	55.1954	55.532	129.892	34.6581	32.4353	176.44	53.9761	37.9269	140.203	27.5097	28.1053	242.413	28.9298	31.2807	307.942	28.5101	28.735	283.168	33.6139	23.8208	186.316
ENSMUSG00000000148	Brat1	92.0625	83.7982	127.964	97.864	99.5878	143.898	167.724	145.113	166.206	87.4189	84.8016	89.9075	108.794	113.78	114.832	81.3301	78.3123	71.0363	83.1063	64.2668	105.455	147.894	105.965	135.283	92.1809	89.5719	55.4426
ENSMUSG00000000149	Gna12	601.721	607.761	901.818	851.032	691.816	918.312	1204.9	780.363	894.32	640.566	632.896	935.975	634.765	695.29	929.528	812.939	707.732	766.612	707.568	933.854	910.786	989.875	525.737	730.98	696.803	759.091	671.132
ENSMUSG00000000154	Slc22a18	147.41	77.2957	47.5733	139.459	39.7724	33.7356	245.721	80.7607	42.0121	147.271	58.5782	46.412	124.761	37.9269	38.4901	195.217	50.2038	18.5256	189.754	57.3606	27.1808	220.707	58.8709	43.0108	164.361	35.2816	23.332
ENSMUSG00000000157	Itgb2l	26.2944	39.8063	16.7818	22.7079	32.4281	13.1841	26.9899	27.3209	9.93761	15.2595	26.2037	9.93761	18.8684	16.2148	13.6478	32.762	33.5707	9.93761	43.5849	23.5173	9.93761	24.6715	32.959	18.8843	14.9269	17.1517	9.93761
ENSMUSG00000000159	Igsf5	919.237	319.46	190.557	121.4	105.065	35.4782	167.724	142.548	51.7843	968.208	176.281	50.8441	753.148	129.681	182.728	493.903	127.733	30.1339	368.719	113.099	46.5945	546.54	193.408	70.1791	866.932	93.6657	74.5739
ENSMUSG00000000167	Pih1d2	40.8608	40.9424	40.7103	41.7477	45.511	32.858	38.8828	36.7568	38.2851	59.9898	58.5782	43.0615	45.1649	64.5157	37.4072	71.8156	41.9898	34.5325	75.7171	36.1898	32.7729	41.7047	36.0538	39.4102	39.0242	39.6347	34.5965
ENSMUSG00000000168	Dlat	357.409	297.025	289.36	336.471	295.563	405.75	443.418	353.96	455.77	643.35	393.221	376.328	429.675	340.353	296.908	447.114	327.851	283.079	384.315	344.447	339.795	548.74	340.241	340.873	374.823	386.764	334.847
ENSMUSG00000000171	Sdhd	272.871	292.751	247.433	296.034	203.178	216.075	316.438	291.792	283.059	457.684	408.836	263.681	346.134	348.865	259.542	330.116	235.74	190.547	303.202	299.596	201.367	455.213	235.117	213.541	257.968	271.354	246.862
ENSMUSG00000000182	Fgf23	18.65	9.93761	24.1619	62.2769	24.6922	31.0881	28.3643	14.9877	22.4783	9.93761	18.0868	21.6926	17.3553	18.0487	45.9677	28.5794	9.93761	52.2221	15.6382	15.9075	61.0177	9.93761	9.93761	14.9767	37.2349	9.93761	75.692
ENSMUSG00000000184	Ccnd2	947.73	162.277	1497.34	398.458	242.592	998.262	124.424	464.63	963.126	585.798	196.533	1766.24	303.824	165.081	1491.36	140.77	59.3139	1214.14	105.175	64.2668	1262.85	78.003	62.7583	1122.68	439.901	69.0151	1915.82
ENSMUSG00000000194	Gpr107	709.6	546.91	578.896	634.646	538.505	613.681	692.49	610.168	592.251	636.853	379.443	498.482	688.672	440.051	519.952	697.87	683.261	535.649	755.372	502.485	566.643	713.765	555.069	610.576	693.467	600.264	413.994
ENSMUSG00000000197	Nalcn	70.3642	28.1004	55.307	21.5836	21.3542	154.337	29.7202	21.1647	158.013	23.0069	9.93761	93.1304	50.687	16.2148	63.7123	27.5097	15.4339	103.32	27.745	17.6362	146.49	27.25	18.2464	109.681	65.0516	15.5452	71.216
ENSMUSG00000000202	Btbd17	13.6667	17.4019	16.7818	21.5836	20.4782	13.1841	17.9712	13.3017	9.93761	15.2595	16.7239	13.7596	13.7495	18.0487	13.6478	25.33	19.7744	17.377	17.2759	9.93761	13.6175	9.93761	18.2464	13.2947	19.9208	13.6537	15.836
ENSMUSG00000000204	Slfn4	249.434	39.8063	298.675	83.3246	65.8486	18.5479	21.2029	30.2201	26.6665	18.1446	33.4452	18.8954	59.4278	31.3005	89.3724	13.4898	34.6402	53.0478	15.6382	22.1349	32.7729	19.1059	28.735	32.0532	51.3035	30.832	28.4926
ENSMUSG00000000214	Th	9.93761	9.93761	9.93761	9.93761	9.93761	16.1637	14.0368	9.93761	19.4663	9.93761	9.93761	13.7596	9.93761	9.93761	9.93761	9.93761	9.93761	9.93761	9.93761	9.93761	9.93761	9.93761	9.93761	9.93761	14.9269	9.93761	9.93761
ENSMUSG00000000215	Ins2	9.93761	9.93761	9.93761	9.93761	9.93761	9.93761	164.12	53.7722	167.377	9.93761	9.93761	9.93761	9.93761	9.93761	9.93761	9.93761	9.93761	9.93761	9.93761	9.93761	9.93761	9.93761	9.93761	9.93761	9.93761	9.93761	9.93761
ENSMUSG00000000216	Scnn1g	214.775	194.394	39.7193	41.7477	205.897	69.6194	52.7171	462.077	94.6264	175.219	151.405	84.5293	296.418	206.512	95.4948	40.8412	52.2377	131.392	31.2626	113.099	97.4224	55.4917	279.641	57.1422	135.885	46.0504	131.168
ENSMUSG00000000223	Drp2	110.557	25.6267	759.441	46.4769	51.8811	639.268	32.3881	54.6526	355.427	31.5981	34.4492	348.704	64.8506	32.6455	703.567	21.9168	21.0573	482.281	17.2759	28.7641	719.824	27.25	25.4544	925.985	44.33	30.832	406.3
ENSMUSG00000000244	Tspan32	46.229	24.3589	54.345	31.0588	34.6587	16.1637	17.9712	30.2201	17.8368	9.93761	15.2244	15.7139	30.3606	19.73	34.1277	9.93761	19.7744	25.5674	15.6382	17.6362	23.6561	17.5467	25.4544	33.9181	9.93761	13.6537	13.8362
ENSMUSG00000000247	Lhx2	15.5658	15.7325	15.2679	15.1536	23.8775	13.1841	9.93761	35.8371	9.93761	9.93761	9.93761	13.7596	13.7495	9.93761	17.1389	13.4898	9.93761	20.6714	9.93761	9.93761	13.6175	9.93761	13.5127	14.9767	9.93761	9.93761	17.5405
ENSMUSG00000000248	Clec2g	39.7775	28.1004	40.7103	31.0588	24.6922	18.5479	19.6336	31.1705	19.4663	16.7707	15.2244	13.7596	21.6556	16.2148	25.0028	35.8259	34.6402	30.1339	34.6919	17.6362	15.4877	20.5748	24.329	21.1371	46.0824	25.0329	27.2339
ENSMUSG00000000253	Gmpr	47.2946	129.035	62.0132	44.5916	124.882	36.344	66.268	169.032	39.5325	36.6706	240.686	76.9832	42.9379	160.202	72.9867	40.8412	72.3362	43.0613	45.7712	66.5602	40.2966	58.8942	117.406	47.4649	33.6139	53.4264	32.1858
ENSMUSG00000000263	Glra1	25.0979	40.9424	25.2718	17.9706	43.3692	17.3959	19.6336	29.2623	9.93761	18.1446	35.4479	37.4065	22.9741	43.0995	36.3196	18.1865	66.3409	29.2372	38.061	32.5214	22.4343	15.8406	31.9151	23.2588	26.097	39.6347	28.4926
ENSMUSG00000000266	Mid2	465.328	832.992	510.952	557.422	958.383	975.077	457.79	856.095	703.054	708.326	930.355	726.799	479.368	764.56	618.825	857.843	917.197	609.721	781.352	1109.74	708.883	549.841	773.619	563.938	1590.75	1425.68	797.482
ENSMUSG00000000275	Trim25	1961.21	1314.36	1612.72	1290.05	1025.53	691.242	1103.14	1027.12	707.719	2046.62	1494	1066.57	1717	2254.27	1518.59	1811.03	1246.05	1605.11	1510.81	1510.8	978.415	1478.26	1266.48	906.485	3498.58	3520.36	2278.33
ENSMUSG00000000276	Dgke	299.358	208.302	366.658	199.819	165.768	201.652	144.887	118.586	168.547	278.438	230.571	299.822	248.799	243.035	280.751	206.469	249.464	291.051	265.752	219.942	273.096	266.98	156.397	327.297	274.668	337.167	381.019
ENSMUSG00000000278	Scpep1	415.445	223.275	587.273	564.606	290.81	669.653	548.803	389.719	771.865	378.758	244.364	428.381	445.535	257.638	473.538	386.281	183.752	487.061	287.599	295.11	496.013	472.819	282.482	440.97	369.817	187.243	492.025
ENSMUSG00000000282	Mnt	491.794	289.545	463.48	498.153	359.372	472.936	431.441	329.266	426.604	545.881	267.347	384.827	444.478	387.775	466.474	500.453	214.167	497.416	397.831	245.754	507.951	494.826	373.372	489.312	371.486	167.966	360.133
ENSMUSG00000000290	Itgb2	369.628	77.2957	618.916	315.804	212.015	74.5089	28.3643	317.344	205.968	20.6643	28.3213	37.4065	195.853	172.396	356.471	60.3295	99.129	540.428	20.1755	56.205	145.49	50.9328	127.88	244.966	78.6554	42.8563	80.1586
ENSMUSG00000000295	Hddc2	137.185	153.705	76.2673	70.542	93.4187	63.0769	77.2537	120.299	63.8043	164.976	187.329	109.211	147.074	162.642	89.3724	101.211	118.868	56.3415	106.223	126.635	57.9487	101.393	132.637	61.5034	73.5656	89.5719	58.841
ENSMUSG00000000296	Tpd52l1	170.905	145.129	55.307	68.7093	86.5529	63.8964	63.8166	109.155	78.0802	203.137	199.294	134.863	136.454	143.118	86.3073	130.426	119.853	66.9708	114.604	137.9	78.2801	93.6125	105.01	56.2676	211.188	115.102	80.1586
ENSMUSG00000000301	Pemt	28.6366	48.8015	37.7272	30.0549	38.322	37.2064	37.599	22.2414	37.0317	46.521	47.1547	41.9384	37.3069	43.0995	31.9094	33.789	38.8647	32.7879	36.9435	46.8945	27.1808	30.9867	32.959	33.9181	35.4323	54.4733	56.5768
ENSMUSG00000000303	Cdh1	6982.61	8266.41	2124.47	10428.7	10432.8	2267.79	8932.1	8481.05	2911.7	10965.8	8466.65	3511.62	7945.7	9669.64	3256.45	14611.5	13279.7	3559.9	11509.4	14441.3	3466.58	9562.47	9547.78	2099.29	16443	17090.6	4680.74
ENSMUSG00000000305	Cdh4	26.2944	23.0641	65.8272	21.5836	17.6806	36.344	24.1686	16.4093	39.5325	18.1446	16.7239	33.953	17.3553	22.842	48.0793	16.8046	26.9801	33.6624	24.0875	22.1349	31.6739	13.8391	18.2464	43.0108	19.9208	13.6537	32.1858
ENSMUSG00000000308	Ckmt1	934.501	661.136	307.989	174.612	351.228	44.0121	293.67	550.594	106.403	408.473	637.487	510.165	171.475	537.294	304.986	89.8636	192.585	53.0478	87.3197	410.585	67.1318	151.208	469.907	76.2248	207.846	329.069	68.9739
ENSMUSG00000000317	Bcl6b	96.1784	26.8726	185.892	99.6777	51.1767	45.6935	37.599	45.7951	46.9224	15.2595	18.0868	35.1106	39.572	31.3005	151.35	38.8463	25.84	193.74	21.5204	19.217	110.47	23.3439	25.4544	165.085	97.2396	21.3093	157.659
ENSMUSG00000000318	Clec10a	343.152	43.2031	472.788	76.0293	65.1544	26.5477	14.0368	106.581	31.9425	35.6667	26.2037	31.6146	370.459	43.0995	103.645	30.6875	26.9801	114.561	20.1755	24.8652	51.779	91.387	53.9898	123.345	44.33	13.6537	59.9711
ENSMUSG00000000320	Alox12	95.1498	44.3283	61.0578	26.9885	24.6922	33.7356	16.1572	23.2926	44.4744	397.33	34.4492	46.412	223.391	37.9269	64.7456	31.7284	22.2966	39.681	60.8522	20.707	49.7107	73.5264	24.329	86.5521	92.1809	26.2234	52.0303
ENSMUSG00000000325	Arvcf	184.174	288.477	263.274	231.306	316.609	385.752	285.28	468.886	420.77	288.659	265.508	283.879	241.39	281.972	271.662	217.718	256.325	312.573	222.04	233.411	334.818	226.217	346.867	313.72	194.472	201.44	163.172
ENSMUSG00000000326	Comt	311.581	329.074	477.443	456.84	323.398	668.054	597.898	524.21	882.658	495.75	432.715	480.426	412.757	329.408	392.807	360.072	275.926	393.854	339.603	271.557	495.018	578.446	389.463	398.56	271.328	330.081	379.92
ENSMUSG00000000339	Rtca	187.235	156.92	212.01	193.519	167.81	206.46	209.74	188.661	256.203	275.65	229.651	233.907	237.155	200.422	209.02	218.655	177.863	168.183	179.334	219.942	201.367	304.421	163.994	200.796	150.966	249.07	283.164
ENSMUSG00000000340	Dbt	194.377	161.205	187.758	219.613	116.005	207.262	261.307	186.101	280.724	419.616	208.495	264.744	280.547	155.323	188.797	313.263	86.2577	176.971	241.818	106.322	189.403	542.139	175.383	261.947	129.176	126.304	279.864
ENSMUSG00000000346	Dazap2	1410.73	1617.47	1559.68	2239.85	2065.24	1732.17	2825.79	2764.52	2528.06	1877.72	2373.4	1436.05	1349.23	1945.65	1394.53	1985.02	1535.75	1246.79	1618.87	2508.92	1415.01	2208.6	2100.78	1330.38	1343.92	1527.83	1152.33
ENSMUSG00000000355	Mcts1	228.029	209.372	194.289	218.714	156.918	149.52	194.14	199.75	189.601	330.463	253.558	178.57	235.038	205.294	167.55	279.552	193.566	149.798	325.044	153.657	161.469	304.421	201.942	178.695	184.438	177.099	190.722
ENSMUSG00000000359	Rem1	60.991	21.735	154.148	32.0554	27.8596	76.1361	21.2029	28.2963	50.5725	9.93761	15.2244	40.8118	36.1666	19.73	118.896	16.8046	15.4339	70.224	20.1755	13.8809	38.1713	13.8391	15.3213	57.1422	19.9208	15.5452	55.4426
ENSMUSG00000000365	Rnf17	15.5658	13.7713	19.45	15.1536	14.3493	13.1841	14.0368	18.9056	13.9743	9.93761	15.2244	13.7596	17.3553	14.0727	15.5357	15.2849	9.93761	18.5256	15.6382	13.8809	18.5208	15.8406	9.93761	16.3947	17.5991	15.5452	13.8362
ENSMUSG00000000374	Trappc10	669.91	926.921	788.289	860.01	1009.25	1082.21	879.264	823.76	961.96	859.617	849.567	950.84	779.572	973.573	931.546	787.68	1102.18	965.697	788.626	1267.7	1025.16	858.973	862.546	859.006	823.567	1293.17	1011.71
ENSMUSG00000000378	Ccm2	213.756	252.141	239.045	188.118	213.374	163.165	197.74	151.095	159.184	182.666	178.123	212.631	209.624	169.958	178.682	241.146	312.178	207.31	208.504	287.259	180.427	231.727	165.892	171.891	271.328	326.032	262.265
ENSMUSG00000000381	Wap	13.6667	39.8063	32.6698	9.93761	17.6806	9.93761	9.93761	16.4093	9.93761	9.93761	34.4492	13.7596	39.572	208.947	161.477	13.4898	18.432	13.1767	9.93761	22.1349	9.93761	9.93761	18.2464	9.93761	14.9269	23.8208	9.93761
ENSMUSG00000000384	Tbrg4	362.5	495.664	324.754	455.044	640.941	326.549	498.508	493.57	353.093	472.539	586.069	409.26	477.253	581.049	421.064	340.414	749.823	463.96	316.724	819.578	447.264	378.177	538.038	311.175	408.198	815.739	531.586
ENSMUSG00000000385	Tmprss2	1024.05	625.909	216.672	2985.85	786.779	242.505	3726	967.563	553.759	1491.65	580.56	194.54	1026.89	537.294	216.096	3774.38	522.717	152.997	3438.23	577.564	160.47	5477.49	1126.48	380.746	987.018	336.155	80.1586
ENSMUSG00000000386	Mx1	103.372	81.6325	119.536	35.9824	41.2157	24.6649	17.9712	39.4955	23.9069	117.404	138.493	108.141	131.141	271.022	109.75	42.8238	37.8155	79.141	47.9472	52.7285	33.8645	25.9718	48.09	37.5936	338.106	475.817	125.643
ENSMUSG00000000392	Fap	119.783	49.9138	407.624	173.712	76.2255	155.139	100.292	47.5775	167.377	80.8307	61.4098	116.701	220.215	108.88	305.996	107.818	83.2808	282.282	95.7312	39.7978	210.338	37.0044	49.0772	166.787	288.026	210.564	356.835
ENSMUSG00000000394	Gcg	17.1791	13.7713	13.479	16.6298	15.565	14.8024	43.9647	16.4093	42.0121	21.852	21.7629	18.8954	26.7514	19.73	19.974	13.4898	15.4339	20.6714	15.6382	13.8809	19.8798	9.93761	9.93761	14.9767	26.097	21.3093	27.2339
ENSMUSG00000000399	Ndufa9	183.153	250.004	235.317	236.702	161.003	209.665	270.897	281.57	238.683	370.4	322.486	261.554	260.441	289.271	180.705	290.79	179.826	128.99	269.914	293.989	177.435	368.271	235.117	193.997	227.899	228.807	186.316
ENSMUSG00000000402	Egfl6	22.6347	15.7325	62.9678	23.8062	29.4019	252.114	21.2029	25.3362	299.403	13.4737	9.93761	181.765	9.93761	14.0727	100.59	9.93761	13.5837	166.585	13.7122	13.8809	231.264	9.93761	16.853	178.695	14.9269	13.6537	110.153
ENSMUSG00000000409	Lck	96.1784	25.6267	124.219	32.0554	27.8596	46.5319	29.7202	36.7568	37.0317	18.1446	18.0868	48.6325	25.5158	35.3033	62.6781	21.9168	22.2966	66.1564	25.3272	39.7978	50.7457	28.5101	24.329	58.8889	29.9153	42.8563	54.3069
ENSMUSG00000000411	Tssk3	22.6347	24.3589	23.0307	26.9885	27.8596	21.7248	29.7202	16.4093	13.9743	23.0069	24.0262	25.5675	36.1666	33.9793	22.5575	30.6875	30.3192	21.6925	49.0318	19.217	22.4343	28.5101	29.8041	22.2107	22.0715	19.9927	24.6581
ENSMUSG00000000416	Cttnbp2	46.229	47.687	235.317	88.7837	63.0697	656.06	97.8733	80.7607	560.757	26.3332	34.4492	407.135	30.3606	39.2283	308.015	31.7284	30.3192	316.558	17.2759	38.6006	397.514	25.9718	37.0752	429.944	29.9153	27.3961	188.519
ENSMUSG00000000420	Galnt1	1085.11	737.992	907.402	764.84	674.858	807.178	591.911	761.642	763.701	1980.73	983.601	832.982	1508.81	793.725	781.244	1325.56	914.261	659.1	1109.72	875.596	676.06	1056.97	672.39	629.231	1825.9	1007.93	943.6
ENSMUSG00000000435	Myf5	23.8796	9.93761	128.9	13.4068	16.6604	122.996	9.93761	33.0525	128.719	9.93761	9.93761	24.3053	13.7495	9.93761	134.12	9.93761	9.93761	38.8302	9.93761	9.93761	54.8697	19.1059	9.93761	193.997	9.93761	9.93761	171.991
ENSMUSG00000000439	Mkrn2	661.768	772.15	683.131	749.576	957.705	782.392	820.599	935.229	788.193	683.264	863.338	826.611	615.738	855.701	694.488	637.058	780.166	666.267	744.98	895.762	715.846	686.262	909.846	719.109	504.969	639.719	628.281
ENSMUSG00000000440	Pparg	111.583	47.687	288.429	96.9568	59.5873	58.9708	41.4333	57.2881	74.5216	57.1232	45.2297	41.9384	59.4278	50.7345	117.88	88.9165	46.1148	184.958	87.3197	49.235	103.448	66.7916	42.1239	111.39	92.1809	33.0718	127.853
ENSMUSG00000000441	Raf1	1104.44	1364.52	1130.73	1350.2	1743.77	1386.01	1538.9	1646.54	1408.6	1121.35	1443.52	1496.57	1098.76	1476.63	1239.2	1163.74	1481.92	1225.29	1302.99	1669.87	1340.42	1192.27	1560.66	1209.15	910.297	1347.79	1234.72
ENSMUSG00000000486	Sept1	68.2865	37.5207	103.592	41.7477	43.3692	41.4767	37.599	35.8371	46.9224	24.1357	51.9372	41.9384	25.5158	41.814	36.3196	25.33	29.2178	48.078	26.5451	45.7202	46.5945	30.9867	49.0772	51	28.025	27.3961	55.4426
ENSMUSG00000000489	Pdgfb	203.557	303.435	478.373	159.297	203.178	578.497	130.446	309.679	551.426	203.137	212.175	364.641	167.234	289.271	483.628	151.107	747.865	516.533	111.462	498.003	484.075	125.779	320.359	519.842	930.311	1297.22	584.33
ENSMUSG00000000530	Acvrl1	253.51	189.044	565.866	291.54	343.083	347.352	233.729	434.838	489.601	58.0797	263.67	191.347	125.825	280.755	376.658	79.4303	176.881	352.42	56.5734	264.826	293.009	83.587	316.572	303.537	137.561	114.083	321.653
ENSMUSG00000000531	Grasp	95.1498	59.8474	222.266	66.8744	93.4187	147.914	51.4748	74.706	124.026	24.1357	57.6326	135.93	65.9324	85.5475	212.053	29.6382	55.2777	184.958	32.4138	84.8025	195.386	24.6715	76.2797	216.09	39.0242	54.4733	179.705
ENSMUSG00000000532	Acvr1b	310.562	321.596	415.072	429.896	360.73	840.758	511.681	444.201	683.227	338.822	283.891	636.54	323.923	313.598	509.862	258.009	415.015	594.589	265.752	226.677	792.431	587.248	403.661	624.992	246.276	264.264	413.994
ENSMUSG00000000538	Tom1l2	496.884	681.418	658.004	644.523	773.892	934.302	765.525	827.164	961.96	430.758	578.724	665.211	441.306	658.831	679.356	890.584	684.24	639.986	1111.8	800.532	749.663	568.545	679.959	721.653	508.305	477.84	440.372
ENSMUSG00000000544	Gpa33	9.93761	13.7713	16.7818	9.93761	14.3493	35.4782	9.93761	9.93761	29.3356	20.6643	9.93761	20.3245	74.56	14.0727	22.5575	26.4273	9.93761	19.6189	13.7122	9.93761	15.4877	13.8391	9.93761	16.3947	29.9153	13.6537	17.5405
ENSMUSG00000000552	Zfp385a	135.139	31.7013	162.555	187.218	43.3692	167.979	250.517	85.9392	197.785	75.1706	29.3629	160.459	72.407	25.7621	174.634	68.9524	23.5026	122.58	59.7842	19.217	166.459	151.208	45.1171	225.434	42.5703	21.3093	64.4802
ENSMUSG00000000555	Itga5	778.803	142.984	1246.11	784.592	311.857	666.455	425.452	281.57	599.249	241.262	79.2118	551.584	436.019	218.689	1239.2	403.128	217.109	1470.54	225.163	98.4059	889.9	274.689	120.264	654.669	1080.42	386.764	2259.65
ENSMUSG00000000560	Gabra2	13.6667	13.7713	15.2679	9.93761	9.93761	13.1841	9.93761	9.93761	9.93761	9.93761	9.93761	15.7139	9.93761	9.93761	13.6478	9.93761	9.93761	16.1484	9.93761	9.93761	9.93761	9.93761	9.93761	14.9767	9.93761	9.93761	13.8362
ENSMUSG00000000561	Wdr77	357.409	514.882	339.654	360.729	524.258	441.744	367.956	393.976	412.603	550.523	557.605	448.562	422.274	520.278	402.899	393.768	1157.97	710.866	288.64	892.401	489.049	415.596	498.296	431.64	543.339	1822.17	1419.28
ENSMUSG00000000562	Adora3	18.65	37.5207	31.641	16.6298	38.322	14.8024	16.1572	79.0324	17.8368	18.1446	22.9076	20.3245	17.3553	21.3178	13.6478	9.93761	21.0573	16.1484	15.6382	15.9075	17.0748	9.93761	24.329	17.6805	19.9208	21.3093	20.5657
ENSMUSG00000000563	Atp5f1	878.532	920.517	725.94	989.295	762.361	826.367	851.728	979.475	953.797	1899.99	1574.78	965.704	1339.72	1059.85	858.917	1381.69	1018.01	728.386	1220.9	1216.17	808.345	1643.25	880.52	698.76	1265.54	1486.36	1346.78
ENSMUSG00000000567	Sox9	2261.38	3021.98	1314.04	4257.01	4297.18	3443.75	6622.94	5136.56	3871.39	3027.55	4460.8	4028.65	2707.23	4961.38	3304.86	6549.61	2785.53	3037.56	4250.75	4696.69	3448.68	5362	4797.53	2569.79	2649.74	5629.18	4342.41
ENSMUSG00000000568	Hnrnpd	992.505	1078.48	960.442	1236.18	1595.92	1413.19	1214.48	1164.97	1104.23	1130.63	1324.18	1357.48	928.598	1068.35	1077.81	760.55	1583.71	1242.01	859.29	1431.26	1194.23	937.075	1276.88	1286.3	596.72	1310.37	1120.47
ENSMUSG00000000579	Dynlt1c	50.4788	31.7013	29.5605	52.0921	17.6806	27.4723	50.2302	28.2963	35.7717	78.0024	30.3951	24.3053	65.9324	21.3178	29.6571	66.0842	17.0031	26.4995	69.3635	30.0289	27.1808	62.2851	33.9963	29.2102	49.5684	23.8208	17.5405
ENSMUSG00000000581	C1d	213.756	212.581	203.616	238.501	147.383	308.144	251.716	198.044	314.578	365.756	231.49	210.503	246.682	195.55	210.031	213.969	184.734	148.198	236.613	176.143	228.275	273.588	171.587	226.283	142.589	159.844	151.04
ENSMUSG00000000594	Gm2a	742.167	1334.64	968.817	699.295	804.415	684.046	758.341	1666.11	1147.38	392.687	1535.31	685.387	598.825	2325.96	974.92	514.489	719.479	548.393	405.109	1042.52	650.199	668.66	1093.37	672.475	561.689	1144.48	557.958
ENSMUSG00000000600	Krit1	660.75	698.497	604.956	599.627	737.942	646.465	555.988	441.648	517.598	500.392	541.995	670.52	495.226	517.847	603.692	930.81	1277.37	865.36	1120.11	837.504	734.744	491.525	689.42	682.65	978.678	1253.73	1039.18
ENSMUSG00000000605	Clcn4	640.395	707.037	691.507	742.393	754.221	909.517	676.925	774.406	780.029	657.274	742.153	911.554	536.456	722.026	678.347	963.551	866.301	818.375	787.587	995.471	913.77	920.574	786.864	755.568	725.159	847.098	949.093
ENSMUSG00000000617	Grm6	9.93761	15.7325	16.7818	15.1536	16.6604	9.93761	14.0368	13.3017	13.9743	13.4737	9.93761	13.7596	13.7495	9.93761	9.93761	9.93761	13.5837	13.1767	9.93761	13.8809	9.93761	9.93761	9.93761	14.9767	14.9269	9.93761	13.8362
ENSMUSG00000000627	Sema4f	40.8608	13.7713	67.7302	21.5836	23.051	327.349	17.9712	13.3017	35.7717	66.6505	15.2244	50.8441	45.1649	24.3197	60.6071	91.757	17.0031	110.549	66.1779	13.8809	62.0388	23.3439	13.5127	31.1123	56.483	18.616	100.178
ENSMUSG00000000628	Hk2	1763.81	693.16	1243.32	1192.19	996.365	1058.22	555.988	568.467	582.919	2435.47	528.221	1402.08	2424.01	853.27	1774.79	1980.34	1048.35	2988.99	1794.47	866.633	1805.84	1313.27	574.939	903.093	2171.11	1057.5	2569.43
ENSMUSG00000000631	Myo18a	2850.52	2380.56	1690.88	1673.39	2255.14	2394.1	1933.95	2664.12	1749.11	3487.85	2572.6	2178.17	2675.52	2802.26	1837.32	3195.39	1716.81	1404.45	2632.98	2149.33	1791.91	3042.33	2496.17	1835.64	2474.63	1620.89	752.436
ENSMUSG00000000632	Sez6	15.5658	9.93761	19.45	9.93761	14.3493	14.8024	9.93761	13.3017	9.93761	13.4737	9.93761	18.8954	15.6976	9.93761	17.1389	9.93761	15.4339	9.93761	9.93761	9.93761	17.0748	13.8391	9.93761	21.1371	9.93761	9.93761	9.93761
ENSMUSG00000000673	Haao	33.1787	20.3612	32.6698	13.4068	15.565	13.1841	16.1572	17.6985	13.9743	9.93761	9.93761	17.377	15.6976	14.0727	15.5357	16.8046	15.4339	13.1767	18.7699	13.8809	9.93761	9.93761	16.853	16.3947	19.9208	9.93761	21.9714
ENSMUSG00000000682	Cd52	73.4761	30.5128	119.536	54.8816	33.1749	19.6446	24.1686	35.8371	35.7717	13.4737	21.7629	20.3245	32.7075	29.9424	36.3196	21.9168	24.682	34.5325	18.7699	22.1349	29.4496	19.1059	27.6548	29.2102	22.0715	17.1517	25.957
ENSMUSG00000000686	Abhd15	118.759	107.538	108.285	174.612	155.556	160.758	162.918	134.851	129.892	151.932	134.802	167.918	149.197	128.459	135.134	161.438	172.954	164.188	159.524	172.771	128.495	164.46	124.073	127.61	182.766	188.257	154.35
ENSMUSG00000000690	Hoxb6	30.927	15.7325	51.4515	24.8835	23.8775	19.6446	19.6336	16.4093	21.0038	13.4737	9.93761	18.8954	18.8684	16.2148	39.5687	9.93761	13.5837	23.6643	9.93761	13.8809	17.0748	15.8406	15.3213	34.8431	19.9208	15.5452	17.5405
ENSMUSG00000000693	Loxl3	103.372	90.2863	353.622	129.53	98.2176	529.716	134.058	80.7607	525.763	83.656	82.0081	407.135	116.249	96.615	417.028	64.1688	50.2038	256.768	50.1143	66.5602	326.855	67.916	54.9682	351.054	68.4625	44.9883	240.261
ENSMUSG00000000706	Btn1a1	199.477	4951.56	410.417	596.035	6865.48	341.751	1168.98	11360.2	839.508	188.25	8704.39	800.066	345.077	10092.5	1492.37	64.1688	2421.46	336.482	51.1949	3060.07	275.088	199.762	6084.89	169.339	112.385	2590.86	175.297
ENSMUSG00000000708	Kat2b	526.402	502.07	537.944	694.806	636.192	629.673	662.556	748.027	571.255	821.563	673.294	445.376	624.194	578.619	493.718	828.842	347.441	548.393	788.626	576.444	570.622	813.871	644.007	524.082	693.467	335.143	389.813
ENSMUSG00000000711	Rab5b	404.246	313.05	414.141	691.214	369.553	646.465	728.409	680.801	805.686	625.714	414.347	455.997	468.795	416.953	422.074	852.23	342.544	415.365	686.783	433.001	515.91	906.274	497.349	545.282	661.775	405.993	300.76
ENSMUSG00000000724	Cryba1	68.2865	75.1243	39.7193	53.9529	83.8027	54.0208	25.5931	43.1083	30.6456	29.5224	64.2343	81.2979	49.587	49.4697	55.4113	49.69	96.1622	68.5982	78.8866	51.5661	70.1789	42.8689	69.5328	78.8105	42.5703	39.6347	49.7462
ENSMUSG00000000730	Dnmt3l	20.0331	9.93761	25.2718	16.6298	12.8948	13.1841	14.0368	14.9877	9.93761	13.4737	13.4515	20.3245	15.6976	9.93761	25.0028	13.4898	9.93761	18.5256	9.93761	9.93761	17.0748	9.93761	9.93761	13.2947	14.9269	9.93761	24.6581
ENSMUSG00000000731	Aire	18.65	20.3612	9.93761	9.93761	16.6604	9.93761	17.9712	16.4093	13.9743	13.4737	15.2244	9.93761	13.7495	16.2148	9.93761	9.93761	15.4339	9.93761	13.7122	15.9075	9.93761	9.93761	16.853	13.2947	9.93761	13.6537	9.93761
ENSMUSG00000000732	Icosl	134.116	52.1325	201.751	83.3246	60.9816	66.3518	52.7171	41.3068	87.5455	37.67	38.417	98.4965	68.0935	39.2283	130.062	54.5437	36.762	124.984	45.7712	46.8945	100.436	33.4184	41.1208	90.8446	37.2349	33.0718	70.0953
ENSMUSG00000000738	Spg7	545.741	360.05	404.831	362.525	311.857	355.352	403.892	312.234	362.428	629.427	344.536	366.766	529.056	367.105	417.028	705.354	315.117	318.949	689.901	300.717	350.742	524.535	301.422	306.083	504.969	257.174	276.565
ENSMUSG00000000739	Sult5a1	30.927	17.4019	51.4515	29.0427	14.3493	26.5477	37.599	21.1647	29.3356	19.4336	15.2244	18.8954	21.6556	19.73	56.4528	16.8046	15.4339	24.6231	9.93761	13.8809	26.025	13.8391	15.3213	34.8431	17.5991	9.93761	23.332
ENSMUSG00000000740	Rpl13	578.311	696.362	542.598	3384.44	3612.2	3008.86	4050.41	5077.85	5246.2	4149.53	5522.84	4212.31	3858.07	5159.44	3306.88	2842.76	3809.21	2524.78	2600.77	5974.85	3269.68	3704.47	4040.82	2927.53	2793.16	3886.5	3402.1
ENSMUSG00000000743	Chmp1a	651.591	424.126	413.21	592.443	405.52	412.949	805.035	610.168	557.258	871.683	479.552	441.127	733.066	530.002	452.347	1008.45	418.932	304.602	805.253	582.046	420.4	1109.77	510.597	418.917	795.213	433.317	241.361
ENSMUSG00000000751	Rpa1	302.413	258.555	364.796	320.297	222.209	475.335	372.748	353.96	505.933	529.171	351.885	351.892	422.274	362.241	280.751	353.519	112.952	204.117	287.599	200.856	326.855	510.231	289.111	362.931	201.159	151.72	141.108
ENSMUSG00000000753	Serpinf1	316.673	52.1325	1852.78	1530.64	214.054	1147.77	1530.52	240.673	1772.43	218.018	50.0288	780.953	574.512	96.615	1288.62	247.704	62.3304	1021.44	70.424	38.6006	951.563	162.252	38.0922	601.249	836.91	50.2763	1958.66
ENSMUSG00000000759	Tubgcp3	533.527	663.271	494.197	543.054	753.543	571.3	588.319	596.551	439.437	610.861	660.44	561.142	613.624	622.372	562.328	685.707	773.314	642.375	787.587	794.93	592.507	547.64	654.414	555.458	556.684	717.615	599.713
ENSMUSG00000000766	Oprm1	17.1791	9.93761	13.479	9.93761	9.93761	13.1841	9.93761	9.93761	9.93761	13.4737	9.93761	15.7139	9.93761	9.93761	9.93761	9.93761	9.93761	13.1767	9.93761	9.93761	9.93761	9.93761	9.93761	13.2947	14.9269	13.6537	9.93761
ENSMUSG00000000776	Polr3d	225.991	300.23	231.588	320.297	353.942	312.945	303.257	302.013	276.054	266.357	355.56	280.69	246.682	351.297	307.005	239.272	424.807	381.105	253.265	501.365	366.666	235.033	328.88	253.457	259.638	569.913	377.721
ENSMUSG00000000782	Tcf7	160.693	104.307	247.433	63.1977	98.9028	253.715	61.3605	66.0242	203.63	78.9455	94.0959	342.329	103.463	105.204	259.542	71.8156	101.106	244.805	80.9973	101.8	293.009	98.0599	90.6735	261.947	59.9185	116.121	345.841
ENSMUSG00000000787	Ddx3x	7854.61	9458.52	9700.11	14590.5	14422.5	16195.3	11246.1	14009.5	14717.1	12681.8	15143.7	19418.4	7784.01	11237	12425.7	11907.4	14683.1	16524.2	9682.77	19686.1	17065.6	10297.2	12028.8	10955.5	12370.6	18000.8	26445.1
ENSMUSG00000000791	Il12rb1	18.65	25.6267	23.0307	16.6298	25.4965	13.1841	14.0368	13.3017	13.9743	19.4336	20.5854	21.6926	17.3553	36.6188	30.788	15.2849	25.84	21.6925	18.7699	19.217	19.8798	17.5467	24.329	16.3947	33.6139	31.9561	27.2339
ENSMUSG00000000792	Slc5a5	4577.23	1079.55	644.975	80.5913	58.8895	30.1947	42.7011	37.673	22.4783	6331.31	439.144	328.515	5696.87	299.002	640.011	8113.53	454.182	212.896	6445.17	270.435	223.293	13539.7	1442.42	945.484	3760.41	173.04	131.168
ENSMUSG00000000794	Kcnn3	43.017	23.0641	100.774	28.021	19.5784	135.863	24.1686	31.1705	66.1923	39.6574	15.2244	29.2373	56.1608	16.2148	74.0141	25.33	23.5026	88.8319	21.5204	13.8809	75.2459	47.4927	20.8034	117.37	53.0339	17.1517	59.9711
ENSMUSG00000000804	Usp32	796.103	826.588	589.134	904.003	746.76	746.412	772.709	671.44	642.405	997.908	808.254	752.284	813.394	774.282	664.223	1191.8	1005.29	771.39	1152.32	1002.19	781.491	1095.47	760.375	669.931	1257.2	1005.91	998.53
ENSMUSG00000000805	Car4	86.9114	21.735	342.448	33.0454	21.3542	25.6124	16.1572	20.056	30.6456	9.93761	9.93761	25.5675	18.8684	19.73	101.609	23.0791	18.432	132.193	13.7122	9.93761	63.059	13.8391	15.3213	123.345	19.9208	15.5452	53.1695
ENSMUSG00000000811	Txnrd3	98.2348	157.991	147.606	154.79	193.659	236.099	147.292	157.93	189.601	98.6841	153.249	233.907	94.9229	146.781	182.728	87.0216	212.206	227.257	75.7171	222.187	223.293	79.1208	163.044	183.796	80.3495	151.72	312.856
ENSMUSG00000000817	Fasl	21.3559	17.4019	21.8734	17.9706	23.8775	14.8024	9.93761	9.93761	13.9743	15.2595	9.93761	24.3053	18.8684	19.73	22.5575	9.93761	19.7744	21.6925	13.7122	15.9075	22.4343	13.8391	13.5127	18.8843	9.93761	17.1517	19.0982
ENSMUSG00000000823	Zfp512b	463.292	459.362	394.59	529.584	462.518	498.528	759.539	416.961	392.767	516.174	344.536	326.39	588.254	463.148	536.095	482.674	368.989	403.414	496.587	378.078	476.116	620.254	560.746	485.072	294.704	261.226	190.722
ENSMUSG00000000826	Dnajc5	1339.5	1445.64	1103.74	1477.68	1849.57	991.067	1560.45	1451.7	1005.11	1667.98	1406.8	980.569	1357.68	1533.74	1063.69	1675.4	1963.44	1308.1	1687.45	2182.94	1180.3	1558.55	1449.99	969.223	2246.16	2301.59	1576.37
ENSMUSG00000000827	Tpd52l2	768.626	668.608	538.875	842.952	611.093	549.709	733.198	634.847	628.409	896.743	674.212	476.178	767.946	544.587	489.682	1330.24	807.573	510.161	1473.4	692.974	567.638	799.571	675.229	496.097	1153.8	688.278	537.08
ENSMUSG00000000838	Fmr1	946.713	1038.99	990.219	946.2	1168.64	1250.1	716.436	866.306	996.946	1269.84	1437.09	1293.78	838.761	1096.3	1075.79	988.808	1333.16	1254.75	1056.73	1515.28	1287.71	835.872	1207.83	1065.87	1225.51	2203.48	2333.25
ENSMUSG00000000861	Bcl11a	111.583	231.83	135.451	42.698	199.779	181.613	50.2302	355.663	204.799	59.9898	266.428	151.932	38.4418	258.855	100.59	18.1865	92.2035	85.6051	20.1755	122.125	141.494	32.2074	275.853	148.062	19.9208	79.3151	43.9942
ENSMUSG00000000869	Il4	36.5022	20.3612	34.7082	36.9521	21.3542	38.9222	36.3085	28.2963	39.5325	28.4708	21.7629	32.788	22.9741	27.1766	28.5152	34.8101	25.84	29.2372	34.6919	22.1349	42.4075	32.2074	25.4544	35.7638	33.6139	34.18	30.9665
ENSMUSG00000000876	Pxmp4	90.0029	135.475	141.062	112.357	92.7327	114.946	159.313	177.568	175.567	127.68	172.597	88.8325	104.529	180.928	111.783	105.931	70.3401	85.6051	115.65	116.485	107.461	186.528	170.638	136.988	61.632	43.9237	39.3343
ENSMUSG00000000881	Dlg3	522.331	440.143	239.045	399.356	545.968	360.952	579.937	704.628	405.602	596.009	408.836	316.826	441.306	536.079	281.761	1024.36	322.953	210.502	696.137	362.384	275.088	1120.77	909.846	306.083	488.285	234.887	130.063
ENSMUSG00000000884	Gnb1l	38.6902	54.3441	46.5995	47.4167	51.1767	78.5746	45.2243	69.5022	102.873	36.6706	62.352	68.3275	39.572	62.0241	56.4528	32.762	39.9099	50.5678	39.1737	44.5429	61.0177	45.1869	56.9216	67.5819	24.119	30.832	24.6581
ENSMUSG00000000889	Dbh	18.65	9.93761	23.0307	9.93761	15.565	13.1841	9.93761	9.93761	9.93761	13.4737	13.4515	13.7596	9.93761	18.0487	22.5575	9.93761	13.5837	9.93761	13.7122	9.93761	9.93761	9.93761	15.3213	13.2947	17.5991	9.93761	15.836
ENSMUSG00000000901	Mmp11	54.6998	32.8803	142.932	94.2343	39.0481	154.337	95.4535	65.1534	230.506	18.1446	32.4353	94.2042	44.0529	35.3033	104.663	34.8101	26.9801	100.908	25.3272	24.8652	116.483	34.6209	37.0752	137.84	24.119	18.616	42.835
ENSMUSG00000000902	Smarcb1	353.335	316.255	382.487	329.283	220.85	408.95	466.173	335.227	477.936	477.181	285.729	366.766	451.879	344.001	376.658	378.793	204.358	290.254	357.281	219.942	376.617	434.305	299.528	422.31	319.745	250.083	187.417
ENSMUSG00000000903	Vpreb3	9.93761	15.7325	16.7818	9.93761	12.8948	18.5479	14.0368	9.93761	23.9069	13.4737	15.2244	13.7596	15.6976	9.93761	15.5357	9.93761	9.93761	13.1767	9.93761	9.93761	17.0748	9.93761	9.93761	17.6805	9.93761	15.5452	13.8362
ENSMUSG00000000915	Hip1r	2842.38	2774.38	1395.92	1816.12	3496.91	752.809	1969.86	2774.73	880.326	2921.76	1920.86	971.013	2867.86	2545.89	1202.88	3483.48	2893.18	1107.44	3024.69	3103.76	1070.91	3266.71	3058.98	907.332	2934.91	2957	667.836
ENSMUSG00000000916	Nsun5	123.88	176.199	170.025	143.97	221.529	176.802	154.506	175.861	167.377	165.907	201.134	193.476	121.57	206.512	201.943	155.804	196.51	217.683	144.915	276.044	201.367	151.208	205.735	169.339	166.034	324.007	266.665
ENSMUSG00000000934	Top1mt	79.6859	96.763	87.6001	80.5913	76.2255	132.648	89.3981	85.0767	129.892	107.115	98.7349	74.8229	110.925	108.88	92.4348	80.3804	84.2735	88.8319	98.8812	72.2785	120.489	122.458	96.4136	111.39	51.3035	62.8051	58.841
ENSMUSG00000000938	Hoxa10	13.6667	9.93761	30.6049	23.8062	9.93761	14.8024	19.6336	20.056	19.4663	15.2595	9.93761	23.016	15.6976	9.93761	22.5575	13.4898	9.93761	16.1484	18.7699	9.93761	13.6175	13.8391	9.93761	28.2472	14.9269	9.93761	21.9714
ENSMUSG00000000942	Hoxa4	13.6667	9.93761	26.3642	13.4068	14.3493	14.8024	17.9712	14.9877	9.93761	13.4737	9.93761	15.7139	9.93761	9.93761	18.6002	9.93761	9.93761	18.5256	9.93761	9.93761	13.6175	9.93761	9.93761	20.0315	14.9269	9.93761	17.5405
ENSMUSG00000000948	Gm38393	131.047	141.912	69.6309	85.1454	111.221	65.5338	99.0827	91.9701	66.1923	178.012	115.402	63.9828	149.197	126.014	68.8714	138.89	93.1936	60.4416	143.871	97.2741	58.9727	165.564	144.997	82.2538	102.293	111.025	50.8893
ENSMUSG00000000957	Mmp14	2244.08	732.655	2551.55	2870.95	685.033	2618.74	3449.47	1072.22	2992.16	2604.37	661.359	2659.1	2645.93	669.769	2976.06	2437.74	343.524	2508.06	2008.51	463.262	2542.73	2990.63	640.223	2163.72	2019.35	280.469	2618.86
ENSMUSG00000000958	Slc7a7	207.637	101.075	198.02	132.239	98.9028	172.792	132.854	122.012	231.674	154.728	108.926	140.199	206.447	91.7001	147.297	154.865	78.3123	120.977	174.122	81.3932	174.442	175.496	115.501	178.695	177.747	53.4264	87.9573
ENSMUSG00000000959	Oxa1l	483.651	455.091	458.825	386.78	409.592	552.907	500.903	629.741	749.706	554.236	608.106	467.681	484.654	618.726	520.961	400.32	233.779	340.467	357.281	412.827	530.832	637.856	510.597	577.506	256.298	279.456	201.735
ENSMUSG00000000976	Heatr6	289.171	307.708	299.607	262.777	330.186	324.948	338.005	330.969	290.064	364.827	316.973	258.365	301.708	358.593	319.121	344.158	450.266	309.384	292.801	367.989	271.105	334.147	377.159	272.134	309.729	537.537	255.664
ENSMUSG00000000982	Ccl3	235.165	77.2957	298.675	129.53	118.737	30.1947	21.2029	107.439	70.9568	27.4083	21.7629	32.788	131.141	67.0025	148.31	44.7961	60.3203	237.627	20.1755	40.9902	100.436	39.3642	44.1218	77.087	109.023	33.0718	126.748
ENSMUSG00000000983	Wfdc18	198.457	3938.75	395.521	104.209	1055.37	56.4993	172.529	1404.9	176.736	337.893	5934.08	656.716	449.764	4481.45	890.188	65.1268	1811.74	331.7	76.7741	2762.09	374.627	129.099	1848.22	58.8889	262.978	3903.69	492.025
ENSMUSG00000001014	Icam4	22.6347	18.9262	33.6919	25.9433	26.2919	39.7761	28.3643	20.056	25.3005	18.1446	19.3652	30.4315	27.9689	18.0487	29.6571	23.0791	33.5707	41.3753	22.8209	23.5173	36.0285	19.1059	22.0094	56.2676	17.5991	22.5819	27.2339
ENSMUSG00000001016	Ilf2	346.207	475.378	420.658	461.331	545.289	498.528	481.742	451.011	458.103	449.328	547.504	559.018	392.666	455.855	523.988	386.281	598.097	591.403	422.782	598.854	498.003	453.012	537.091	496.097	313.068	648.824	653.553
ENSMUSG00000001017	Chtop	1047.46	1127.58	1107.46	1438.18	1336.84	1322.05	1367.71	1299.4	1245.34	1450.81	1277.36	1170.62	1069.16	1123.04	1028.38	1484.58	1434.95	1241.22	1300.91	1556.73	1268.82	1349.56	1103.77	1067.57	1180.48	1934.44	1666.45
ENSMUSG00000001018	Snapin	321.766	253.21	286.566	367.017	224.247	468.937	484.137	290.941	529.263	543.096	321.567	366.766	367.286	213.818	307.005	415.295	159.203	310.979	412.386	216.575	375.622	618.053	326.04	400.256	216.202	165.936	152.143
ENSMUSG00000001020	S100a4	113.634	31.7013	398.314	151.184	79.6725	276.13	57.6662	113.443	239.851	30.5644	31.4189	97.4238	99.1948	86.7789	285.801	51.6356	40.9515	232.841	22.8209	34.9748	150.485	38.1869	41.1208	150.617	49.5684	39.6347	328.25
ENSMUSG00000001021	S100a3	28.6366	26.8726	25.2718	25.9433	33.1749	17.3959	19.6336	22.2414	13.9743	53.2866	39.399	31.6146	38.4418	31.3005	27.3604	25.33	35.7037	23.6643	27.745	30.0289	27.1808	17.5467	28.735	22.2107	33.6139	41.7858	21.9714
ENSMUSG00000001025	S100a6	3215.81	1394.41	1793.23	4082.85	1159.14	1350.03	4642.96	1691.64	2371.8	5459.9	1460.04	1446.67	3311.71	997.876	1360.24	5330.83	1386.01	1065.24	5417.58	1798.7	1230.03	4438.09	1000.66	1167.61	4699.31	2174.15	1417.08
ENSMUSG00000001027	Scn4a	231.088	57.65	58.1867	22.7079	31.6778	9.93761	14.0368	13.3017	17.8368	218.948	61.4098	59.6233	333.442	63.2705	69.9011	102.156	69.3412	50.5678	149.091	37.3982	40.2966	15.8406	16.853	21.1371	469.933	116.121	62.2278
ENSMUSG00000001029	Icam2	171.926	72.9506	153.213	66.8744	56.793	32.858	21.2029	41.3068	40.7747	78.9455	70.8024	62.8944	158.748	68.2444	105.681	51.6356	81.2946	75.0926	86.2669	51.5661	77.2692	27.25	35.0277	78.8105	129.176	47.11	57.7096
ENSMUSG00000001034	Mapk7	171.926	170.845	215.739	198.919	178.697	165.572	207.34	192.926	204.799	145.407	116.327	145.533	162.991	171.177	227.213	192.404	201.415	206.512	177.249	207.593	186.412	178.806	161.145	172.741	284.686	261.226	214.947
ENSMUSG00000001036	Epn2	896.849	505.273	646.836	816.915	438.77	580.896	990.605	599.104	610.913	1022.97	381.28	364.641	748.92	368.321	458.402	1930.76	400.327	393.854	1943.05	355.658	466.167	1663.05	483.155	546.978	1617.43	419.149	234.758
ENSMUSG00000001039	B9d1	104.399	67.5052	63.9216	71.4577	45.511	65.5338	74.8179	53.7722	88.7266	75.1706	55.7386	40.8118	71.3296	53.2568	63.7123	128.544	51.2216	37.9768	175.165	44.5429	42.4075	104.723	50.0627	64.1119	224.558	59.6888	47.4533
ENSMUSG00000001052	Sec24b	1037.28	1080.62	1034.88	1088.05	1290.72	1512.32	1049.27	1039.89	1343.3	1069.37	1081.83	1059.14	925.428	1087.8	1239.2	1111.35	1515.2	1497.62	907.091	1374.13	1396.11	1008.57	1094.31	1183.72	1297.23	1808.01	1532.43
ENSMUSG00000001053	N4bp3	147.41	131.182	209.212	154.79	127.611	132.648	125.629	122.869	108.755	78.9455	102.443	208.375	120.506	113.78	164.514	182.085	127.733	181.763	132.383	173.895	187.409	148.999	109.781	164.235	140.914	133.425	147.73
ENSMUSG00000001054	Rmnd5b	235.165	247.866	264.206	225.91	262.969	210.467	230.132	208.278	232.843	201.276	174.439	216.887	268.908	212.601	266.612	193.341	247.504	238.425	220.999	237.899	227.279	252.66	241.75	230.53	181.093	212.591	208.341
ENSMUSG00000001056	Nhp2	383.883	389.953	286.566	408.339	234.439	204.858	393.112	296.051	276.054	575.587	423.531	264.744	469.853	337.921	226.202	349.775	366.05	225.662	360.4	439.726	202.364	599.35	278.694	176.994	271.328	432.305	432.679
ENSMUSG00000001062	Vps9d1	133.093	172.987	164.422	127.724	170.532	204.858	202.54	197.191	210.643	135.147	148.639	155.13	131.141	176.053	172.611	124.779	170.99	152.197	122.974	152.532	177.435	175.496	200.994	171.891	120.785	116.121	79.0427
ENSMUSG00000001065	Zfp276	176.009	313.05	237.181	164.704	277.23	260.92	192.94	211.689	161.525	172.426	223.213	192.411	207.506	294.136	269.642	207.406	334.708	307.79	207.462	330.993	299.978	165.564	326.04	256.004	251.287	336.155	209.442
ENSMUSG00000001076	C1ql4	13.6667	9.93761	13.479	9.93761	14.3493	9.93761	9.93761	13.3017	9.93761	13.4737	13.4515	9.93761	15.6976	14.0727	13.6478	13.4898	9.93761	9.93761	9.93761	13.8809	13.6175	9.93761	9.93761	9.93761	14.9269	9.93761	9.93761
ENSMUSG00000001082	Mfsd10	203.557	253.21	229.724	187.218	231.722	296.94	255.313	252.603	353.093	211.508	240.686	277.501	220.215	296.569	292.869	202.719	169.026	216.885	213.71	228.921	236.245	219.605	240.803	230.53	211.188	241.979	255.664
ENSMUSG00000001089	Luzp1	2388.57	1421.09	1956.06	2144.69	1623.05	3425.36	1649.04	1201.55	2396.29	2172.83	1197.5	3608.23	1766.67	1359.98	2534.28	2038.33	1680.6	3262.1	1832.91	1514.16	3214.98	1789.54	1378.1	2635.06	2087.73	1533.9	3667.93
ENSMUSG00000001095	Slc13a2	28.6366	322.665	41.6982	61.3554	393.305	43.1689	60.1306	414.407	48.1418	19.4336	331.673	46.412	30.3606	376.832	60.6071	15.2849	141.51	30.1339	22.8209	197.487	30.5665	33.4184	355.387	25.2962	24.119	101.842	20.5657
ENSMUSG00000001098	Kctd10	947.73	520.22	1198.65	827.689	556.144	1023.05	594.306	569.318	1016.77	835.485	434.552	805.375	732.009	600.495	985.007	798.906	678.367	976.049	514.258	779.245	950.568	440.907	488.833	737.763	1552.39	1208.21	1270.98
ENSMUSG00000001100	Poldip2	307.506	452.956	285.634	287.047	431.306	303.342	360.768	482.505	360.095	345.324	463.94	273.249	326.038	504.477	293.879	307.645	390.534	260.755	298.002	375.836	307.942	417.798	450.034	320.509	231.241	342.229	256.764
ENSMUSG00000001103	Sebox	9.93761	9.93761	9.93761	9.93761	19.5784	9.93761	14.0368	9.93761	9.93761	9.93761	15.2244	17.377	13.7495	14.0727	17.1389	9.93761	15.4339	14.7908	13.7122	9.93761	17.0748	17.5467	15.3213	13.2947	14.9269	17.1517	15.836
ENSMUSG00000001105	Ift20	191.316	209.372	258.615	245.694	195.019	266.524	222.935	259.42	284.227	323.032	308.703	243.478	253.033	227.211	211.042	259.883	213.186	220.875	243.899	225.554	206.352	309.926	192.459	202.496	227.899	267.303	304.059
ENSMUSG00000001119	Col6a1	1034.23	142.984	6578.5	2647.41	795.597	6115.41	2287.1	596.551	5145.92	425.187	153.249	1911.69	1514.09	404.796	6379.1	552.852	151.342	4641.18	153.265	117.613	3794.75	265.878	101.191	3028.41	2034.36	127.321	7261.1
ENSMUSG00000001120	Pcbp3	78.6521	46.5701	109.223	115.976	46.2225	114.946	155.708	57.2881	113.457	56.1657	55.7386	87.7572	64.8506	57.0244	121.943	125.721	70.3401	109.746	116.697	71.1364	107.461	104.723	45.1171	101.984	82.0426	65.9136	149.937
ENSMUSG00000001123	Lgals9	327.876	185.833	496.059	397.56	161.684	671.252	390.716	307.975	809.185	440.043	270.104	1027.29	421.217	345.217	769.138	274.869	119.853	485.468	229.327	135.648	656.167	315.431	146.898	541.89	651.767	561.819	994.136
ENSMUSG00000001127	Araf	683.14	684.62	505.367	757.657	774.57	524.119	918.772	708.032	509.432	798.359	513.529	432.629	763.718	564.034	557.283	839.133	649	492.637	909.169	561.877	449.254	887.574	905.116	634.319	605.06	555.748	225.954
ENSMUSG00000001128	Cfp	243.319	57.65	374.107	129.53	109.169	56.4993	40.1607	124.582	61.4119	48.462	46.1931	44.1813	223.391	94.1583	157.426	61.2905	87.2494	197.732	46.8604	60.8191	93.401	50.9328	81.0858	112.245	71.8662	57.6061	70.0953
ENSMUSG00000001131	Timp1	165.799	96.763	472.788	287.047	166.449	286.536	176.132	98.8512	316.912	132.347	85.7322	132.728	151.32	95.3868	329.216	169.887	195.529	542.818	112.509	169.399	278.075	61.1559	103.101	141.248	496.627	305.783	1307.23
ENSMUSG00000001134	Uxt	62.0358	66.4139	48.5453	125.918	100.958	91.5433	102.709	85.9392	88.7266	125.812	106.148	95.2776	105.596	92.9294	87.3293	104.988	98.1403	73.4711	128.202	115.356	84.3374	103.613	100.236	74.4994	102.293	117.14	76.8094
ENSMUSG00000001138	Cnnm3	233.126	250.004	266.069	199.819	241.912	468.937	377.54	454.416	519.931	214.298	303.19	282.816	226.568	272.239	309.025	218.655	161.168	259.957	211.628	166.027	367.661	363.868	324.146	401.104	184.438	162.89	124.537
ENSMUSG00000001143	Lman2l	378.792	278.86	212.942	468.516	310.499	279.332	746.369	425.474	312.243	460.47	279.296	213.695	413.815	299.002	241.359	541.624	248.484	188.95	523.612	224.432	230.268	700.564	352.547	296.748	389.842	248.057	168.684
ENSMUSG00000001150	Mcm3ap	510.116	434.804	524.913	381.391	402.127	695.24	487.73	548.041	671.563	561.662	458.43	516.537	553.37	466.795	512.889	471.445	355.277	408.195	463.324	464.382	563.659	541.039	417.857	524.082	379.83	329.069	285.364
ENSMUSG00000001151	Pcnt	1034.23	1352.78	1023.72	857.317	1492.15	1158.16	817.008	1438.09	1017.94	904.168	1303.98	959.334	1050.14	1302.87	864.97	1170.28	851.619	890.046	1343.52	1217.29	1045.05	669.76	1305.26	936.158	903.625	621.509	465.65
ENSMUSG00000001155	Ftcd	17.1791	9.93761	18.1584	19.2276	9.93761	13.1841	16.1572	9.93761	16.057	9.93761	13.4515	15.7139	13.7495	16.2148	21.2877	13.4898	9.93761	19.6189	9.93761	9.93761	18.5208	9.93761	13.5127	17.6805	14.9269	9.93761	20.5657
ENSMUSG00000001156	Mxd1	1000.65	680.35	790.151	566.402	572.425	484.932	567.963	497.826	400.935	989.555	778.876	725.737	944.452	810.738	891.197	872.81	468.869	874.916	933.07	612.3	794.42	915.074	557.908	590.226	1293.89	822.82	762.325
ENSMUSG00000001157	Gmcl1	254.53	150.489	212.01	181.816	152.832	300.942	202.54	190.367	265.545	356.469	197.453	299.822	240.331	187.021	297.918	241.146	178.844	208.906	202.255	145.781	256.167	291.208	148.798	302.688	351.458	180.142	203.937
ENSMUSG00000001158	Snrnp27	172.947	166.561	147.606	228.608	137.842	224.085	212.139	193.779	218.823	310.027	212.175	150.865	253.033	151.662	159.452	188.652	150.359	126.586	185.587	164.902	156.477	291.208	196.253	178.695	161.013	179.128	137.795
ENSMUSG00000001166	Oas1c	44.0903	44.3283	40.7103	49.2913	32.4281	42.3238	63.8166	52.0083	49.3584	44.5721	32.4353	31.6146	36.1666	40.5238	36.3196	37.8435	24.682	29.2372	44.6795	22.1349	36.0285	48.6417	41.1208	45.6886	37.2349	29.6983	23.332
ENSMUSG00000001168	Oas1h	15.5658	17.4019	16.7818	19.2276	14.3493	9.93761	17.9712	9.93761	9.93761	13.4737	24.0262	20.3245	26.7514	39.2283	19.974	13.4898	24.682	18.5256	18.7699	13.8809	13.6175	15.8406	18.2464	13.2947	44.33	65.9136	27.2339
ENSMUSG00000001173	Ocrl	365.555	336.551	469.065	448.757	352.585	568.901	460.185	428.028	519.931	423.33	375.769	459.184	345.077	317.246	465.465	375.985	246.523	393.057	367.679	334.356	508.946	476.12	382.838	473.198	256.298	213.605	308.458
ENSMUSG00000001175	Calm1	2286.82	2358.15	3913.72	2416.7	3155.1	3325.43	1485.03	3278.4	3401.46	1964.95	3745.72	3150.65	1776.19	2887.31	3247.37	1902.7	3352.18	3699.24	1467.17	4029.05	3224.93	1778.54	2751.56	2743.57	2291.18	5556.35	5646.32
ENSMUSG00000001211	Agpat3	513.17	480.717	512.813	565.504	673.501	685.645	676.925	722.498	581.753	536.598	523.63	345.516	510.027	553.095	444.275	578.114	638.232	468.739	453.969	854.309	503.972	655.459	649.684	410.435	538.334	460.639	310.657
ENSMUSG00000001225	Slc26a3	18.65	23.0641	16.7818	19.2276	17.6806	16.1637	14.0368	16.4093	9.93761	16.7707	26.2037	24.3053	9.93761	14.0727	21.2877	16.8046	24.682	14.7908	22.8209	17.6362	9.93761	13.8391	22.0094	22.2107	14.9269	13.6537	19.0982
ENSMUSG00000001227	Sema6b	159.672	38.6659	380.625	165.604	96.847	76.1361	61.3605	74.706	85.1821	19.4336	33.4452	58.5307	51.7851	51.9968	214.074	44.7961	34.6402	152.997	28.9298	30.0289	132.496	28.5101	39.1052	145.507	37.2349	23.8208	81.274
ENSMUSG00000001228	Uhrf1	139.231	175.128	97.0138	53.0231	62.3741	114.141	58.8991	115.158	81.6335	419.616	330.755	113.492	368.344	292.92	176.658	113.476	48.1632	69.4113	122.974	115.356	94.4067	197.557	104.056	79.6717	98.9246	134.442	75.692
ENSMUSG00000001229	Dpp9	385.919	346.165	415.072	336.471	313.894	356.152	515.273	376.097	389.267	473.468	379.443	327.453	474.082	414.522	454.365	490.16	390.534	362.779	353.122	409.464	321.878	471.719	323.199	356.144	531.661	580.03	361.232
ENSMUSG00000001240	Ramp2	397.119	273.517	650.558	503.541	248.026	386.552	555.988	422.069	596.916	519.887	392.303	303.01	441.306	378.048	469.502	348.839	172.954	282.282	355.201	250.242	349.747	547.64	338.347	434.184	276.337	173.04	191.823
ENSMUSG00000001247	Lsr	1067.81	962.144	423.451	930.04	814.589	474.535	1337.78	991.388	679.728	1787.7	1068.98	664.149	1334.43	1103.59	574.435	1545.38	1116.86	467.943	1211.55	1290.11	538.79	1912.73	987.417	539.346	1679.14	1417.58	634.874
ENSMUSG00000001248	Gramd1a	858.179	609.896	884.138	724.436	645.689	569.7	643.399	513.997	472.103	574.659	305.028	554.77	756.319	522.709	860.935	514.489	355.277	964.104	445.653	313.052	681.033	720.365	546.553	622.448	698.471	197.384	564.551
ENSMUSG00000001249	Hpn	156.607	206.163	88.5425	139.459	141.25	102.854	221.736	209.984	120.504	183.597	208.495	134.863	146.012	222.341	105.681	202.719	105.057	72.6598	169.952	159.28	100.436	295.612	204.787	108.826	125.821	80.3425	54.3069
ENSMUSG00000001270	Ckb	132.07	98.9197	491.405	153.889	117.371	506.525	105.125	129.718	498.934	32.6245	74.5441	731.047	117.314	132.126	625.887	47.738	81.2946	455.197	41.3865	75.7009	520.884	39.3642	72.4272	344.266	54.7603	52.3779	552.464
ENSMUSG00000001280	Sp1	1631.53	1882.15	1947.69	2831.45	2578.64	2914.53	2732.42	2926.17	2818.42	1916.69	2567.09	1926.55	1343.94	2257.92	1865.56	2372.26	2132.75	1926.8	1741.48	2791.22	2244.4	2251.5	2356.17	2127.27	1967.65	2647.5	2214.61
ENSMUSG00000001281	Itgb7	119.783	92.4464	184.959	60.4331	72.0819	51.5344	33.7042	128.862	52.9939	20.6643	29.3629	41.9384	32.7075	55.7704	81.1922	37.8435	44.0575	57.163	53.3509	32.5214	43.4583	15.8406	77.2417	83.114	65.0516	34.18	41.6722
ENSMUSG00000001285	Myg1	162.736	180.481	135.451	149.381	144.657	144.701	219.337	199.75	189.601	173.357	170.755	125.252	164.052	166.3	143.244	147.349	119.853	116.967	163.696	149.156	123.492	206.377	186.768	151.468	130.854	142.575	97.9583
ENSMUSG00000001288	Rarg	581.365	488.19	540.736	576.28	495.085	696.839	929.547	750.58	726.38	988.627	415.265	528.219	673.874	499.615	644.047	652.027	500.199	548.393	551.675	571.962	711.867	906.274	642.115	841.202	886.947	824.843	361.232
ENSMUSG00000001289	Pfdn5	368.61	572.532	462.549	599.627	591.42	582.495	676.925	873.964	1014.44	584.87	824.78	651.406	517.427	604.141	479.592	470.509	496.283	399.431	477.877	725.466	528.842	653.258	567.37	462.173	354.796	411.053	423.886
ENSMUSG00000001300	Efnb2	684.158	444.414	763.164	242.098	487.622	625.675	130.446	531.87	495.434	892.102	676.967	1165.31	480.425	531.217	925.493	383.473	546.213	1092.31	372.878	880.077	1053.01	99.1711	421.643	769.134	1542.38	1010.97	2396.97
ENSMUSG00000001305	Rrp15	118.759	169.774	122.346	140.362	193.659	174.396	112.368	180.128	180.246	188.25	318.81	217.951	126.888	217.471	156.414	127.603	404.244	248.793	124.02	362.384	179.43	106.943	185.82	142.1	189.455	657.929	615.096
ENSMUSG00000001313	Rnd2	167.842	138.694	281.908	260.979	153.513	222.483	297.265	178.421	301.738	175.219	95.9521	192.411	181.017	134.569	238.328	254.262	130.687	288.66	250.143	153.657	223.293	243.847	148.798	223.735	286.356	160.86	216.048
ENSMUSG00000001323	Srr	312.599	447.617	338.723	457.739	695.886	464.138	485.335	507.188	462.77	432.615	600.76	568.575	363.056	571.326	417.028	349.775	859.449	652.728	277.196	951.779	548.738	515.732	582.508	410.435	439.901	1240.58	1030.39
ENSMUSG00000001333	Sync	52.5924	59.8474	76.2673	79.6796	72.0819	131.04	61.3605	69.5022	118.156	60.9436	71.7385	128.457	53.9761	51.9968	87.3293	69.9073	68.3418	88.8319	80.9973	66.5602	129.496	95.8368	74.3544	141.248	59.9185	80.3425	85.7312
ENSMUSG00000001334	Fndc5	30.927	46.5701	32.6698	32.0554	42.6528	27.4723	45.2243	28.2963	45.7	34.6581	41.3533	46.412	42.9379	45.658	33.0223	46.7594	50.2038	35.3987	61.9192	24.8652	33.8645	27.25	30.8638	37.5936	56.483	39.6347	35.7902
ENSMUSG00000001348	Acp5	178.05	118.293	247.433	101.491	78.9835	143.095	86.9731	127.15	197.785	141.677	132.956	250.922	120.506	133.348	173.623	91.757	68.3418	149.798	60.8522	106.322	155.478	84.7025	89.716	155.724	109.023	53.4264	137.795
ENSMUSG00000001349	Cnn1	71.4021	37.5207	1178.18	123.207	161.684	4890.7	156.91	122.012	5624.01	28.4708	34.4492	3985.12	44.0529	67.0025	2577.65	31.7284	30.3192	1929.19	21.5204	40.9902	3781.82	23.3439	49.0772	3589.61	56.483	41.7858	2110.25
ENSMUSG00000001366	Fbxo9	154.564	199.744	254.888	208.818	254.819	343.351	297.265	352.257	351.926	173.357	251.719	229.652	202.209	227.211	208.009	229.902	152.324	245.603	214.751	201.979	292.014	309.926	242.698	282.32	191.127	155.783	216.048
ENSMUSG00000001376	Vps50	371.664	424.126	317.303	349.049	309.821	336.15	359.57	376.097	329.751	414.973	436.389	275.375	448.707	444.914	318.111	410.615	578.518	347.639	467.482	356.779	345.766	401.289	339.294	330.691	426.553	637.696	432.679
ENSMUSG00000001380	Hars	400.173	444.414	351.76	350.846	474.052	437.744	345.194	501.23	462.77	620.144	567.705	440.065	478.311	539.725	393.816	354.455	490.408	479.095	350.002	632.469	463.183	535.537	453.82	387.532	369.817	673.104	656.849
ENSMUSG00000001383	Zmat2	310.562	303.435	317.303	422.71	358.015	394.551	571.555	455.267	570.089	557.949	485.062	341.266	402.183	333.057	316.092	355.392	339.606	291.848	361.44	462.141	370.646	586.148	387.57	364.628	309.729	473.793	311.757
ENSMUSG00000001403	Ube2c	159.672	108.614	87.6001	30.0549	44.7982	62.2569	33.7042	69.5022	57.8136	272.862	150.483	53.0481	323.923	143.118	117.88	84.1772	33.5707	38.8302	73.6016	53.8891	50.7457	89.1603	57.8967	47.4649	144.265	82.3959	54.3069
ENSMUSG00000001415	Smg5	760.485	873.552	634.737	604.116	982.8	613.681	642.201	668.036	546.76	843.839	799.992	699.191	794.369	1001.52	752.998	935.487	1088.48	724.404	860.329	1013.4	628.316	798.471	854.032	613.12	965.336	1130.32	774.41
ENSMUSG00000001416	Cct3	1101.39	1226.84	1040.47	1118.58	1024.17	1218.92	991.802	1181.13	1195.2	1977.94	1529.8	1457.28	1492.96	1293.15	1123.2	1294.69	1533.8	1230.86	1020.36	1632.9	1148.48	1601.45	1017.69	1003.98	1457.33	2592.88	2711.14
ENSMUSG00000001418	Glmp	464.31	480.717	497.921	592.443	505.262	422.547	836.164	680.801	565.423	601.579	534.649	450.687	464.566	550.664	457.393	594.02	380.741	345.248	491.39	472.227	399.504	781.97	575.885	414.676	469.933	404.981	324.951
ENSMUSG00000001419	Mef2d	1204.16	1524.62	1354.05	1413.04	2295.15	1277.28	1359.33	1570.82	1012.11	1203.95	1617.93	1104.79	1021.6	1955.37	1447.99	1154.38	1972.25	1629	1029.71	2218.79	1317.55	1014.07	1988.22	1089.61	1333.92	1447.93	1730.17
ENSMUSG00000001420	Tmem79	148.432	236.106	92.3098	267.272	277.909	74.5089	309.248	317.344	127.546	277.509	249.88	110.282	218.097	277.105	114.832	212.094	200.434	82.3749	175.165	281.652	92.395	327.542	311.838	103.695	221.216	212.591	71.216
ENSMUSG00000001424	Snd1	2183.03	2130.83	1419.18	1450.75	1739.02	1238.11	1605.94	2049.83	1229.01	3056.32	2030.09	1453.04	2811.85	2496.07	1558.94	1890.54	1969.31	1167.16	1824.6	1889.44	1256.88	2379.09	1695.93	1148.96	2598.04	1677.53	1138.05
ENSMUSG00000001435	Col18a1	1024.05	246.797	2353.36	636.442	440.805	6473.55	403.892	308.827	2757.78	368.542	198.374	2351.22	351.423	256.421	3130.37	206.469	143.477	2519.21	147.003	151.407	2066.39	106.943	125.977	1513.5	436.564	240.966	2897.88
ENSMUSG00000001436	Slc19a1	73.4761	67.5052	105.469	77.8552	94.1046	150.323	108.748	98.8512	158.013	79.8883	94.0959	140.199	73.4838	118.676	156.414	67.0409	108.019	152.997	66.1779	109.711	133.496	79.1208	109.781	110.536	100.609	141.559	184.112
ENSMUSG00000001440	Kpnb1	2155.56	2118.02	1970.95	1942.7	2517.6	2560.38	1807.06	1934.12	2303	3212.23	2367.9	2075.18	2364.82	2379.42	2117.72	2477.03	2898.07	2336.87	1791.35	2991.74	2223.51	2838.85	2268.2	2056.91	2911.56	4398.28	3812.93
ENSMUSG00000001441	Npepps	981.311	1380.53	833.888	604.116	1370.07	761.604	485.335	1020.32	707.719	902.312	1099.27	827.673	933.883	1152.2	818.568	716.58	1552.39	1096.29	777.195	1192.64	950.568	531.136	1300.53	862.397	1615.76	1724.06	1222.64
ENSMUSG00000001444	Tbx21	15.5658	15.7325	27.4417	16.6298	19.5784	21.7248	9.93761	16.4093	22.4783	13.4737	9.93761	21.6926	18.8684	16.2148	28.5152	9.93761	9.93761	19.6189	9.93761	9.93761	26.025	9.93761	13.5127	20.0315	9.93761	18.616	20.5657
ENSMUSG00000001445	Mrpl10	280.002	243.59	239.045	239.4	183.458	245.708	407.486	297.755	306.407	338.822	259.993	177.505	263.616	288.054	202.954	346.03	217.109	162.59	307.363	255.852	190.4	456.313	238.908	212.692	236.253	270.341	137.795
ENSMUSG00000001467	Cyp51	232.107	319.46	242.773	189.019	266.365	274.529	184.537	259.42	232.843	773.299	540.158	493.172	419.102	392.638	309.025	340.414	309.239	408.195	342.723	387.046	379.603	337.45	250.277	233.078	459.923	401.945	904.05
ENSMUSG00000001472	Tcf25	2089.42	2537.45	1888.14	2532.51	3299.56	1996.78	2844.94	2563.72	2089.61	2330.6	2352.29	1605.92	2316.21	2722.07	2002.74	2405	3019.43	2099.59	2448.03	3267.31	1907.27	2229.5	2992.76	1757.65	2319.53	2790.11	1625.81
ENSMUSG00000001473	Tubb6	915.167	1294.08	1098.16	812.425	1712.57	1322.05	567.963	999.045	1229.01	651.704	1469.22	2196.22	622.08	1476.63	1601.3	492.031	2708.21	1634.57	352.082	3374.85	1505.5	200.865	1027.15	696.216	640.09	3008.58	1856.5
ENSMUSG00000001482	Def8	122.856	120.443	155.082	164.704	83.8027	257.718	291.273	169.032	251.531	175.219	156.014	210.503	129.015	157.763	178.682	129.485	60.3203	127.388	106.223	99.5376	193.392	206.377	140.245	189.747	75.2635	60.7285	89.0698
ENSMUSG00000001493	Meox1	43.017	15.7325	97.954	54.8816	30.1651	97.202	25.5931	37.673	115.807	15.2595	13.4515	78.0626	31.5389	28.5687	130.062	19.4833	17.0031	63.7104	17.2759	9.93761	77.2692	13.8391	22.0094	79.6717	33.6139	15.5452	49.7462
ENSMUSG00000001494	Sost	13.6667	13.7713	15.2679	9.93761	16.6604	13.1841	9.93761	9.93761	13.9743	15.2595	9.93761	17.377	20.2925	16.2148	9.93761	9.93761	13.5837	13.1767	9.93761	13.8809	17.0748	9.93761	18.2464	16.3947	9.93761	13.6537	9.93761
ENSMUSG00000001497	Pax9	18.65	20.3612	19.45	16.6298	21.3542	20.7004	17.9712	21.1647	13.9743	13.4737	18.0868	21.6926	17.3553	18.0487	22.5575	13.4898	15.4339	21.6925	13.7122	19.217	22.4343	13.8391	13.5127	14.9767	14.9269	15.5452	17.5405
ENSMUSG00000001504	Irx2	680.087	1813.85	786.428	781.899	1842.79	2214.23	1528.13	1906.89	2053.46	1215.08	1975.01	1643.08	899.005	1833.86	1330.98	707.225	1178.52	1394.1	615.074	1630.66	2009.7	1308.87	1945.65	2044.19	997.025	1910.16	1479.7
ENSMUSG00000001506	Col1a1	8080.49	858.609	49111.5	43929.2	8200.16	42052.4	42444.3	4227.05	49666.6	2537.55	808.254	7958.89	12747.7	2965.08	37380.5	5805.06	1671.79	38155.4	1067.12	791.569	28677.7	2360.39	524.791	17187.1	13551.3	861.259	48332.5
ENSMUSG00000001507	Itga3	2758.95	1350.65	1653.66	1188.6	1092.68	3062.42	1160.6	1439.79	2686.65	2034.56	1072.65	4306.8	1256.23	1109.67	2940.75	1868.09	1412.44	2314.57	1512.88	1180.32	2815.21	1594.85	1180.39	2193.39	1717.5	1418.6	3134.06
ENSMUSG00000001508	Sgca	20.0331	9.93761	20.6831	20.4268	15.565	19.6446	16.1572	13.3017	25.3005	9.93761	9.93761	13.7596	9.93761	16.2148	26.1906	16.8046	19.7744	26.4995	15.6382	9.93761	18.5208	9.93761	15.3213	31.1123	14.9269	13.6537	19.0982
ENSMUSG00000001510	Dlx3	20.0331	26.8726	25.2718	9.93761	58.1912	20.7004	26.9899	122.869	25.3005	18.1446	24.0262	23.016	17.3553	25.7621	30.788	18.1865	13.5837	30.1339	9.93761	22.1349	38.1713	17.5467	24.329	28.2472	9.93761	13.6537	24.6581
ENSMUSG00000001517	Foxm1	147.41	111.842	111.099	76.9424	113.271	140.685	47.7332	99.7107	96.9839	218.018	203.895	112.422	206.447	173.615	186.774	95.5411	143.477	140.198	79.9422	188.502	119.487	64.5403	86.8419	84.8335	127.499	188.257	158.761
ENSMUSG00000001518	Itfg2	127.976	208.302	138.257	165.604	237.157	169.583	174.931	214.247	189.601	164.976	202.975	187.088	182.077	255.204	172.611	163.316	232.798	138.597	165.782	232.288	154.48	165.564	237.96	192.297	135.885	173.04	123.432
ENSMUSG00000001520	Nrip2	65.1647	80.549	98.894	77.8552	92.7327	54.0208	58.8991	78.1677	73.334	54.2475	71.7385	69.4117	53.9761	100.298	86.3073	49.69	112.952	79.141	56.5734	89.3425	76.2578	53.2158	115.501	101.984	66.758	100.82	55.4426
ENSMUSG00000001521	Tulp3	176.009	96.763	322.891	139.459	122.151	484.932	220.536	187.807	502.433	109.923	127.416	477.24	103.463	138.234	377.668	94.5954	93.1936	330.904	71.4838	108.582	402.49	122.458	110.734	426.551	70.1652	133.425	262.265
ENSMUSG00000001524	Gtf2h4	62.0358	74.0377	68.6808	75.1158	60.9816	72.8805	83.3323	67.7642	79.2652	86.4786	97.8075	71.5781	86.3656	76.9127	80.1681	57.4411	51.2216	60.4416	67.2405	67.7055	68.1481	99.1711	69.5328	73.6361	70.1652	84.4479	53.1695
ENSMUSG00000001525	Tubb5	1976.48	2098.81	3211.24	1451.64	1321.92	3666.79	1605.94	1930.72	4099.94	2424.33	2442.25	3026.44	2568.79	2658.88	3494.48	1273.18	1103.16	2374.29	1125.31	1455.91	3081.73	1755.44	1422.56	2991.96	1442.32	1955.68	2738.6
ENSMUSG00000001542	Ell2	1601.01	1262.06	793.873	1258.63	1486.05	610.482	790.668	1021.17	497.767	2079.1	1568.36	815.993	1386.22	1193.51	732.822	2328.3	1877.32	1217.33	1926.43	1645.23	706.894	1176.87	913.63	362.083	2811.5	2971.16	2233.29
ENSMUSG00000001552	Jup	3910.77	5384.86	2737.64	3620.53	6482.98	2846.58	4034.85	5158.68	2925.7	5909.99	4644.38	3846.04	4888.43	6259.04	3963.49	5629.21	6521.09	3721.53	4828.45	9262.64	3686.35	4860.45	5854.09	2852.93	6994.01	9310.74	4779.61
ENSMUSG00000001555	Fkbp10	111.583	52.1325	481.166	202.519	96.847	760.005	172.529	85.0767	692.557	55.2071	55.7386	470.867	107.728	91.7001	523.988	57.4411	53.2524	444.841	31.2626	63.1187	492.034	89.1603	60.8163	435.033	109.023	43.9237	463.452
ENSMUSG00000001558	Klhl10	21.3559	21.735	23.0307	25.9433	23.051	17.3959	22.7089	21.1647	17.8368	16.7707	20.5854	30.4315	18.8684	22.842	27.3604	18.1865	26.9801	27.421	18.7699	15.9075	23.6561	15.8406	20.8034	25.2962	19.9208	18.616	23.332
ENSMUSG00000001566	Mnx1	9.93761	9.93761	13.479	15.1536	12.8948	9.93761	9.93761	9.93761	9.93761	9.93761	13.4515	9.93761	9.93761	9.93761	13.6478	9.93761	15.4339	9.93761	9.93761	9.93761	9.93761	9.93761	9.93761	9.93761	9.93761	17.1517	9.93761
ENSMUSG00000001569	Nom1	274.908	360.05	250.228	335.572	432.663	324.948	334.411	320.75	313.411	344.395	416.183	335.953	277.373	340.353	259.542	352.583	613.76	429.705	331.284	585.408	356.714	336.349	336.454	338.327	361.472	816.751	718.377
ENSMUSG00000001576	Ergic1	526.402	459.362	540.736	739.699	403.484	691.242	1160.6	518.253	734.544	722.249	547.504	573.885	532.227	487.459	547.194	585.599	306.3	454.401	512.179	446.451	479.101	728.066	396.089	562.242	494.959	404.981	427.184
ENSMUSG00000001583	Tnk1	599.685	841.531	372.245	1251.44	1263.59	535.314	1248	852.691	435.937	677.695	484.144	476.178	584.026	646.678	512.889	925.197	786.039	607.332	1016.2	736.67	623.342	802.871	1056.47	606.337	635.086	624.544	260.065
ENSMUSG00000001588	Acap1	109.531	32.8803	138.257	26.9885	33.1749	27.4723	26.9899	29.2623	22.4783	59.9898	22.9076	28.0302	40.6978	29.9424	38.4901	26.4273	21.0573	22.6886	28.9298	24.8652	23.6561	19.1059	26.562	35.7638	44.33	25.0329	27.2339
ENSMUSG00000001604	Tcea3	72.4394	53.2391	41.6982	96.0495	39.0481	68.8031	111.162	59.9161	78.0802	90.2383	51.9372	41.9384	90.6467	46.9317	63.7123	85.1256	25.84	43.0613	78.8866	33.7523	51.779	93.6125	52.0291	63.243	31.7763	31.9561	27.2339
ENSMUSG00000001622	Csn3	1405.64	21788.3	2460.37	4030.79	17254	1975.2	4297.01	21318.8	3557.72	970.993	30329	3584.87	2172.49	28983.8	8268.21	380.665	19727.1	3308.28	258.468	21403.4	2304.06	1026.17	18313.3	937.006	1033.72	23595	3157.13
ENSMUSG00000001627	Ifrd1	7683.67	10946.2	7385.19	7863.99	18242.1	5168.9	5957.36	13231.1	3504.08	7323.37	11920.8	5721.99	8004.88	13672	7951.51	7402.66	9904.31	8759.31	9188.19	11499.7	6759.19	3601.08	15653.5	4337.31	5102.88	6533.39	6060.45
ENSMUSG00000001630	Stk38l	407.3	292.751	277.25	646.319	448.948	436.145	711.647	442.499	371.764	594.153	400.569	386.951	464.566	387.775	424.092	548.173	478.66	357.201	628.585	529.38	327.851	725.866	436.785	345.963	720.155	528.431	452.462
ENSMUSG00000001632	Brpf1	495.866	857.542	586.342	811.528	1286.65	593.69	721.225	814.4	489.601	585.798	863.338	614.239	686.559	1007.6	820.585	554.723	1167.76	867.749	514.258	1323.71	729.771	747.868	1129.31	659.756	534.997	1167.75	757.93
ENSMUSG00000001642	Akr1b3	176.009	70.7745	156.95	305.92	124.199	284.935	286.479	168.178	295.901	1756.14	165.228	268.996	1394.67	148.001	364.546	443.37	111.966	337.279	505.942	111.97	279.07	432.104	105.01	252.608	1017.04	171.01	471.145
ENSMUSG00000001655	Hoxc13	9.93761	9.93761	9.93761	9.93761	34.6587	13.1841	9.93761	56.4105	16.057	9.93761	9.93761	13.7596	13.7495	9.93761	9.93761	9.93761	9.93761	9.93761	9.93761	9.93761	9.93761	9.93761	13.5127	16.3947	9.93761	9.93761	9.93761
ENSMUSG00000001657	Hoxc8	38.6902	13.7713	97.954	74.2019	20.4782	63.8964	45.2243	38.5858	62.6087	16.7707	13.4515	25.5675	35.0205	14.0727	60.6071	23.0791	13.5837	61.2597	13.7122	9.93761	41.3537	13.8391	13.5127	52.7601	37.2349	9.93761	41.6722
ENSMUSG00000001661	Hoxc6	32.0571	18.9262	72.4779	42.698	19.5784	41.4767	42.7011	21.1647	52.9939	16.7707	13.4515	23.016	25.5158	14.0727	60.6071	21.9168	9.93761	42.2193	15.6382	9.93761	39.2359	20.5748	15.3213	43.9053	17.5991	9.93761	27.2339
ENSMUSG00000001663	Gstt1	51.5365	95.6842	195.222	200.719	87.2401	277.731	212.139	122.869	332.086	47.4924	152.327	177.505	76.7106	135.791	181.717	81.3301	84.2735	173.776	69.3635	159.28	177.435	76.8847	139.294	206.744	39.0242	83.4221	137.795
ENSMUSG00000001665	Gstt3	193.357	346.165	132.644	414.626	242.592	144.701	660.162	479.1	215.317	409.402	555.768	143.4	255.15	363.457	131.077	403.128	153.307	83.1828	405.109	326.508	125.493	619.153	443.41	143.804	189.455	78.2874	35.7902
ENSMUSG00000001666	Ddt	116.709	89.2059	98.894	95.142	49.0588	50.7036	129.242	72.1059	56.6112	222.668	126.492	67.2425	161.93	113.78	67.841	156.743	57.298	41.3753	137.606	68.8499	55.8972	214.094	78.2033	55.3922	139.237	56.5631	45.1502
ENSMUSG00000001670	Tat	13.6667	18.9262	15.2679	16.6298	30.1651	14.8024	9.93761	25.3362	13.9743	15.2595	20.5854	15.7139	13.7495	22.842	18.6002	9.93761	13.5837	9.93761	9.93761	22.1349	13.6175	13.8391	27.6548	9.93761	19.9208	13.6537	15.836
ENSMUSG00000001672	Marveld3	227.01	375.002	100.774	322.095	372.946	64.7154	318.835	439.945	75.7084	316.529	342.698	79.1415	283.722	435.189	117.88	471.445	351.359	81.5668	461.245	346.689	82.3198	400.189	523.844	76.2248	478.275	310.846	62.2278
ENSMUSG00000001674	Ddx18	125.928	125.814	169.091	217.814	226.965	262.522	245.721	253.455	351.926	364.827	304.109	228.589	305.939	218.689	248.43	253.325	406.202	310.182	216.834	385.925	240.23	304.421	229.432	233.927	314.737	877.444	724.969
ENSMUSG00000001687	Ubl3	981.311	691.025	892.513	660.686	767.109	783.192	528.446	832.269	642.405	1083.29	799.992	907.307	769.003	694.075	746.945	869.068	698.923	887.657	799.018	817.338	845.144	1138.37	679.013	704.695	703.475	684.232	1101.8
ENSMUSG00000001700	Gramd3	461.256	379.274	500.713	480.191	541.219	225.687	393.112	389.719	187.262	344.395	271.024	175.375	226.568	316.03	220.138	595.891	400.327	263.147	706.529	412.827	212.332	251.559	437.732	154.022	506.637	267.303	421.688
ENSMUSG00000001707	Eef1e1	106.452	139.767	96.0734	139.459	107.118	116.557	100.292	121.156	112.282	250.558	161.543	117.77	187.376	130.904	103.645	149.228	236.72	124.183	114.604	231.166	137.495	190.94	108.827	78.8105	129.176	366.522	357.934
ENSMUSG00000001729	Akt1	1514.52	1266.33	1404.29	1720.96	1462.99	1544.3	1960.29	1416.82	1672.14	1852.66	1260.84	1476.39	1711.72	1539.81	1607.35	1674.47	1448.65	1290.59	1398.59	1706.84	1472.69	1936.93	1379.04	1283.75	1719.16	1862.62	1297.34
ENSMUSG00000001739	Cldn15	45.1609	36.3702	114.85	37.9179	43.3692	37.2064	21.2029	25.3362	30.6456	26.3332	27.2688	32.788	22.9741	50.7345	62.6781	39.8454	44.0575	62.894	31.2626	38.6006	54.8697	21.9819	50.0627	84.8335	33.6139	48.1675	46.3031
ENSMUSG00000001741	Il16	123.88	64.2289	243.705	67.7921	60.9816	72.0658	46.4804	66.8944	81.6335	31.5981	38.417	92.0564	78.8593	50.7345	111.783	20.7215	75.3264	95.277	30.1018	48.0661	112.475	24.6715	62.7583	148.062	35.4323	40.7121	50.8893
ENSMUSG00000001750	Tcirg1	720.795	894.9	883.207	807.936	987.548	512.123	843.347	819.505	400.935	681.408	659.522	596.186	866.241	1123.04	1011.23	740.904	558.939	743.517	856.172	704.178	630.305	852.373	1025.26	658.061	439.901	690.302	285.364
ENSMUSG00000001751	Naglu	146.388	111.842	210.144	170.109	90.6739	135.863	245.721	156.222	173.227	132.347	103.369	123.115	193.734	144.339	151.35	153.925	50.2038	86.4121	151.178	64.2668	107.461	233.931	84.9244	126.757	147.616	69.0151	92.4053
ENSMUSG00000001755	Coasy	174.988	198.674	141.997	157.494	140.568	124.606	254.114	235.559	162.695	247.769	232.41	150.865	221.274	229.645	152.363	243.957	101.106	82.3749	226.204	131.142	119.487	338.55	191.511	123.345	176.074	70.0476	54.3069
ENSMUSG00000001761	Smo	505.027	479.649	703.605	745.985	484.229	1188.54	971.45	824.611	1212.69	718.536	660.44	1025.16	576.626	692.86	834.708	486.417	292.583	661.489	449.811	469.986	1026.15	832.572	612.785	969.223	301.382	260.213	462.353
ENSMUSG00000001763	Tspan33	48.358	499.935	63.9216	72.3729	673.501	38.9222	78.4706	487.612	50.5725	38.6655	712.773	102.785	50.687	754.838	120.927	35.8259	599.076	114.561	38.061	829.662	90.3823	47.4927	520.059	29.2102	46.0824	659.952	58.841
ENSMUSG00000001767	Crnkl1	404.246	340.824	311.715	320.297	265.006	352.952	314.042	281.57	294.734	482.752	407.917	299.822	401.126	330.624	299.937	622.088	418.932	326.122	634.821	444.209	324.865	473.92	294.793	356.992	466.596	599.252	412.895
ENSMUSG00000001768	Rin2	2241.03	2029.44	1397.78	3401.49	1911.97	2332.54	4111.46	3044.43	2744.95	2424.33	1858.43	1833.12	1831.14	1971.16	1423.78	5427.17	1607.2	1580.43	4954.17	1668.75	2201.63	5569.88	2629.54	2155.24	3480.24	1986.02	715.081
ENSMUSG00000001773	Folh1	13.6667	9.93761	23.0307	22.7079	9.93761	18.5479	28.3643	13.3017	16.057	13.4737	9.93761	9.93761	22.9741	14.0727	9.93761	15.2849	9.93761	16.1484	13.7122	9.93761	13.6175	13.8391	9.93761	13.2947	17.5991	9.93761	15.836
ENSMUSG00000001774	Chordc1	462.274	412.379	369.452	296.933	317.288	472.136	381.133	323.305	378.765	591.368	429.96	430.505	397.954	362.241	313.063	417.166	611.802	424.925	448.771	517.054	401.495	613.653	388.517	413.828	646.762	1367.01	1096.3
ENSMUSG00000001783	Rtcb	788.979	725.183	588.203	933.631	690.459	755.208	1045.68	957.352	929.307	1345.01	938.617	722.552	915.915	858.131	625.887	914.907	752.759	578.659	843.702	957.38	677.055	1230.77	739.562	631.775	798.549	1102	817.258
ENSMUSG00000001785	Pwp1	240.261	344.028	254.888	280.755	375.661	321.748	268.499	291.792	284.227	334.178	431.797	304.073	299.592	380.48	267.622	245.831	591.245	342.857	235.573	552.912	325.86	294.511	357.28	269.587	341.444	801.577	688.712
ENSMUSG00000001786	Fbxo7	302.413	285.271	260.479	272.665	267.723	321.748	321.231	304.568	195.447	304.453	257.235	198.798	269.966	268.589	224.181	315.136	317.076	203.319	378.077	313.052	202.364	282.398	275.853	228.831	288.026	244.005	141.108
ENSMUSG00000001794	Capns1	1949	2140.43	2222.17	2159.06	2354.15	3174.34	2475.04	2274.45	3723.3	2373.29	2462.45	3148.53	1832.2	2612.71	2814.68	2800.66	2181.69	2195.14	2103.07	2868.51	2782.4	2509.98	2492.38	2797.83	2204.46	2905.41	2395.87
ENSMUSG00000001802	Lrp3	53.6468	31.7013	168.158	73.2876	36.1312	242.505	91.8214	37.673	251.531	30.5644	37.4313	138.065	46.2741	40.5238	221.149	31.7284	23.5026	144.199	18.7699	33.7523	155.478	25.9718	35.0277	181.245	39.0242	30.832	91.2938
ENSMUSG00000001804	Dsg4	15.5658	9.93761	9.93761	9.93761	28.6336	9.93761	9.93761	27.3209	9.93761	13.4737	13.4515	9.93761	9.93761	9.93761	9.93761	9.93761	9.93761	9.93761	9.93761	9.93761	9.93761	13.8391	9.93761	9.93761	9.93761	9.93761	9.93761
ENSMUSG00000001815	Evx2	13.6667	9.93761	9.93761	13.4068	9.93761	16.1637	16.1572	9.93761	13.9743	9.93761	9.93761	9.93761	9.93761	9.93761	9.93761	13.4898	9.93761	9.93761	9.93761	9.93761	9.93761	9.93761	9.93761	13.2947	9.93761	9.93761	9.93761
ENSMUSG00000001819	Hoxd13	13.6667	9.93761	9.93761	9.93761	9.93761	14.8024	14.0368	9.93761	9.93761	13.4737	13.4515	9.93761	9.93761	9.93761	13.6478	13.4898	9.93761	9.93761	9.93761	13.8809	9.93761	9.93761	9.93761	9.93761	9.93761	13.6537	9.93761
ENSMUSG00000001827	Folr1	99.2628	250.004	53.3818	65.0373	292.847	39.7761	95.4535	422.92	60.2138	191.972	324.323	51.947	164.052	426.679	115.849	119.13	264.166	48.078	93.63	253.608	38.1713	165.564	296.687	41.2154	115.746	182.171	47.4533
ENSMUSG00000001829	Clpb	305.469	320.528	233.452	302.325	308.463	328.949	342.798	364.177	326.25	341.609	354.641	279.627	339.788	386.559	252.471	397.512	388.575	251.983	345.843	372.473	275.088	557.542	337.4	244.117	296.373	337.167	278.764
ENSMUSG00000001833	Sept7	1880.83	1579.05	2129.13	1507.3	1626.44	2203.84	960.675	1246.65	1645.32	2396.49	1772.15	2024.22	1722.29	1505.79	1973.49	1932.63	2571.2	2092.42	1821.48	1935.37	1868.49	1774.14	1455.66	1824.62	2289.52	3198.73	3041.79
ENSMUSG00000001844	Zdhhc4	157.629	181.551	184.026	198.019	180.057	204.858	303.257	218.51	262.042	192.903	194.693	184.959	173.596	211.383	188.797	185.838	150.359	136.997	184.545	185.132	198.377	235.033	203.839	185.497	124.142	164.92	102.396
ENSMUSG00000001847	Rac1	4540.6	3172.46	3143.31	6033.57	3576.94	3001.67	5151.72	3377.1	3495.91	7931.22	3756.74	2738.73	4913.8	3115.74	2946.81	10027.3	4128.26	2863.98	7224.44	4043.61	2924.6	6179.22	2939.79	2559.62	10256	5826.4	3766.8
ENSMUSG00000001855	Nup214	708.583	740.127	733.384	852.828	815.946	950.292	1088.77	873.113	901.317	829.917	886.289	863.774	783.8	854.486	804.445	798.906	827.149	745.11	759.529	926.011	823.264	805.071	826.597	831.875	651.767	920.94	781.002
ENSMUSG00000001864	Aif1l	54.6998	32.8803	114.85	115.071	33.1749	131.844	130.446	40.4025	119.33	54.2475	15.2244	174.31	51.7851	31.3005	138.176	290.79	23.5026	123.381	178.292	30.0289	188.406	391.384	52.0291	195.697	24.119	19.9927	155.453
ENSMUSG00000001865	Cpa3	173.967	1383.73	402.969	61.3554	564.963	36.344	28.3643	3771.02	140.444	26.3332	300.433	55.2454	9.93761	127.237	60.6071	20.7215	106.045	63.7104	17.2759	49.235	88.3685	20.5748	313.731	24.2861	66.758	118.158	144.419
ENSMUSG00000001870	Ltbp1	5737.19	2533.18	1680.64	733.414	2255.14	926.307	479.347	2519.48	742.708	7053.31	2764.45	1720.58	3991.22	2336.9	1386.46	2723.96	2570.22	890.842	2418.94	3538.4	823.264	1378.16	1933.35	505.425	5401.39	2206.51	1133.66
ENSMUSG00000001891	Ugp2	412.39	585.343	605.886	545.748	671.466	661.657	439.825	816.102	778.863	700.9	927.601	608.93	572.398	703.797	568.381	426.525	555.023	543.614	383.275	738.911	548.738	522.334	771.727	500.337	464.928	629.603	578.836
ENSMUSG00000001901	Kcnh6	20.0331	18.9262	9.93761	15.1536	20.4782	18.5479	17.9712	16.4093	19.4663	18.1446	26.2037	29.2373	33.8677	25.7621	23.7935	18.1865	18.432	19.6189	32.4138	23.5173	19.8798	21.9819	22.0094	24.2861	40.8021	29.6983	27.2339
ENSMUSG00000001909	Trmt1	311.581	482.852	302.401	340.963	476.088	325.749	479.347	408.448	336.754	343.466	395.977	328.515	368.344	515.416	386.751	305.772	536.423	401.821	308.403	565.238	363.68	406.792	426.375	394.318	289.695	594.194	385.416
ENSMUSG00000001910	Nacc1	788.979	699.565	597.51	894.127	775.248	810.376	1140.25	776.959	732.211	1335.73	714.61	738.48	1054.37	802.232	906.328	957.938	709.69	694.142	727.313	871.115	780.496	1341.86	726.317	764.047	711.815	968.482	751.338
ENSMUSG00000001911	Nfix	1234.69	3460.62	4148.19	2644.72	5451.46	13123.9	3632.63	6507.2	12712.6	1293.04	5833.11	9104.42	1310.13	5330.76	6853.14	1020.61	2119.05	6829.24	861.368	4555.55	10912	1270.37	5040.62	9566.07	743.507	2063.9	3739.33
ENSMUSG00000001918	Slc1a5	216.815	174.057	590.995	379.594	234.439	464.138	284.082	202.309	385.766	183.597	178.123	434.754	253.033	196.768	534.078	211.156	227.896	845.451	173.08	217.697	615.385	233.931	200.994	477.439	338.106	237.926	883.176
ENSMUSG00000001924	Uba1	2438.43	1956.86	2228.68	2170.73	1874.66	2536.4	2405.61	2292.31	2743.79	3654.9	2327.51	2630.44	2829.81	2434.1	2400.14	2897.01	2120.03	2190.36	2266.2	2788.98	2398.54	3356.9	1956.06	2112.86	3501.92	3612.4	2945.12
ENSMUSG00000001930	Vwf	1790.27	277.791	2098.42	2019.91	559.536	303.342	1111.52	655.271	1005.11	461.398	140.338	297.696	932.826	396.285	1547.84	1034.65	103.082	611.314	813.567	73.42	667.108	1187.87	244.593	572.418	811.892	52.3779	327.15
ENSMUSG00000001942	Siae	271.852	277.791	290.292	332.877	267.723	276.13	415.87	373.543	414.936	336.965	357.397	250.922	286.896	344.001	281.761	311.39	237.701	220.077	285.519	290.624	253.179	339.651	330.773	244.117	284.686	267.303	279.864
ENSMUSG00000001943	Vsig2	52.5924	30.5128	144.802	34.0295	30.9236	26.5477	19.6336	17.6985	17.8368	9.93761	21.7629	21.6926	21.6556	35.3033	68.8714	23.0791	29.2178	62.0771	18.7699	26.1856	66.1147	13.8391	20.8034	95.9892	31.7763	22.5819	39.3343
ENSMUSG00000001946	Esam	380.828	72.9506	1006.04	234.904	123.516	129.432	65.0429	104.006	201.292	24.1357	40.3776	107.07	84.2229	110.106	434.183	46.7594	57.298	305.399	47.9472	42.1782	297.987	23.3439	52.0291	447.755	63.343	30.832	188.519
ENSMUSG00000001948	Spa17	26.2944	18.9262	23.0307	43.6459	28.6336	31.0881	47.7332	30.2201	42.0121	32.6245	28.3213	21.6926	27.9689	27.1766	22.5575	46.7594	21.0573	18.5256	40.2821	19.217	15.4877	33.4184	31.9151	26.2917	46.0824	21.3093	24.6581
ENSMUSG00000001962	Fam50a	208.657	206.163	212.01	231.306	243.95	215.273	285.28	284.126	257.371	300.736	251.719	189.218	278.431	251.553	215.085	216.781	151.342	169.781	217.875	199.733	184.417	388.082	272.064	231.379	217.873	200.426	166.48
ENSMUSG00000001964	Emd	395.082	440.143	445.793	392.17	486.265	567.301	407.486	505.486	650.569	518.031	430.878	480.426	377.862	397.501	389.779	355.392	511.947	545.207	318.804	623.505	563.659	458.514	390.41	394.318	391.511	513.254	651.355
ENSMUSG00000001983	Taco1	65.1647	43.2031	56.268	37.9179	36.1312	56.4993	60.1306	44.0058	50.5725	71.3889	42.3261	54.1475	99.1948	48.2022	51.2315	60.3295	32.4946	34.5325	62.9852	37.3982	46.5945	101.393	45.1171	58.016	44.33	52.3779	42.835
ENSMUSG00000001985	Grik3	87.9422	151.561	1338.23	106.021	283.341	6385.61	190.539	286.681	5579.7	34.6581	203.895	4454.37	48.485	206.512	2548.4	28.5794	136.591	3329.78	20.1755	327.629	5775.68	25.9718	200.994	4540.76	26.097	79.3151	1289.65
ENSMUSG00000001986	Gria3	76.5831	32.8803	184.026	83.3246	44.7982	293.739	58.8991	43.1083	162.695	31.5981	31.4189	216.887	53.9761	22.842	141.217	30.6875	24.682	184.958	25.3272	24.8652	171.449	30.9867	19.5543	126.757	56.483	17.1517	245.762
ENSMUSG00000001988	Npas1	13.6667	20.3612	16.7818	9.93761	14.3493	14.8024	17.9712	16.4093	13.9743	9.93761	15.2244	17.377	9.93761	16.2148	18.6002	16.8046	13.5837	19.6189	13.7122	15.9075	18.5208	19.1059	16.853	21.1371	14.9269	18.616	15.836
ENSMUSG00000001995	Sipa1l2	646.502	949.335	762.233	814.221	1412.8	748.811	563.173	540.381	330.919	544.953	945.962	720.428	569.226	1063.49	815.541	666.996	1336.1	1440.28	742.901	2004.82	1088.81	233.931	807.677	424.006	1072.08	1109.08	2338.74
ENSMUSG00000001998	Ap4e1	198.457	221.137	265.138	175.513	192.979	335.35	197.74	175.007	293.566	244.981	177.202	223.27	235.038	195.55	208.009	229.902	339.606	241.615	262.63	221.065	288.031	249.355	237.96	260.249	293.034	308.821	299.66
ENSMUSG00000001999	Blvra	108.505	83.7982	129.836	145.774	78.9835	83.4445	136.465	125.438	102.873	197.555	126.492	111.352	178.897	103.978	109.75	125.721	71.3384	88.0255	130.293	87.0733	101.44	177.703	103.101	105.406	105.659	63.8421	64.4802
ENSMUSG00000002006	Pdzd4	88.9727	119.368	148.541	86.0554	101.642	231.294	86.9731	87.6634	197.785	59.0352	74.5441	154.064	71.3296	73.2025	148.31	108.762	153.307	136.997	109.367	82.5301	178.432	60.0257	91.6307	154.873	114.066	118.158	114.582
ENSMUSG00000002007	Srpk3	29.7873	44.3283	46.5995	19.2276	47.6426	32.858	26.9899	33.9853	22.4783	29.5224	41.3533	37.4065	22.9741	40.5238	44.9084	24.2152	50.2038	53.0478	26.5451	34.9748	37.1023	19.1059	48.09	40.3141	39.0242	40.7121	24.6581
ENSMUSG00000002010	Idh3g	671.945	673.945	677.547	551.136	527.65	719.227	609.872	755.685	879.159	893.03	956.978	717.243	705.584	776.712	733.831	551.916	470.827	497.416	516.336	712.021	655.172	785.27	677.121	650.429	463.259	553.725	470.046
ENSMUSG00000002012	Pnck	21.3559	36.3702	37.7272	28.021	35.3963	147.914	58.8991	53.7722	169.717	13.4737	33.4452	49.7393	20.2925	35.3033	40.6432	21.9168	22.2966	29.2372	20.1755	36.1898	42.4075	27.25	48.09	46.5776	17.5991	19.9927	25.957
ENSMUSG00000002014	Ssr4	457.184	562.924	438.346	349.049	409.592	284.935	384.727	502.932	452.27	683.264	710.937	389.076	590.368	651.54	389.779	416.231	520.759	298.225	446.692	559.636	312.92	550.941	454.766	317.115	476.607	484.923	340.344
ENSMUSG00000002015	Bcap31	793.05	749.734	634.737	835.769	589.385	740.816	764.328	816.102	891.988	1152.9	977.175	882.886	832.419	758.484	620.843	1043.06	701.859	566.712	1013.08	899.123	661.14	1251.67	785.918	632.623	935.315	769.207	742.548
ENSMUSG00000002017	Fam98a	304.451	284.203	283.771	271.766	343.761	344.951	285.28	327.563	332.086	530.099	318.81	303.01	420.159	279.538	279.742	327.307	377.803	318.949	281.358	354.537	283.053	385.881	367.693	265.343	471.602	525.396	650.256
ENSMUSG00000002020	Ltbp2	262.682	897.035	3167.51	599.627	1589.14	14968.2	866.095	1576.77	15855.2	123.01	907.404	10111.9	142.827	904.308	5883.87	205.531	960.263	6175.53	180.376	1138.87	11621	173.289	1171.88	8064.76	150.966	752.01	5468.36
ENSMUSG00000002028	Kmt2a	2846.45	2690.07	2681.81	3490.37	3012	5033.8	3338.14	2781.53	4305.17	2220.16	1941.05	3689.98	2872.09	2414.66	3204	3347.86	3790.62	3786.82	3475.63	3146.33	3953.86	3078.63	2923.71	3971.94	4674.29	3668.03	3101.11
ENSMUSG00000002031	Ift46	329.913	321.596	292.155	351.745	250.743	349.752	482.939	326.711	425.437	397.33	382.199	357.204	344.019	328.192	355.462	411.551	181.789	266.336	450.85	253.608	330.837	427.702	346.867	368.021	266.318	162.89	192.925
ENSMUSG00000002032	Tmem25	39.7775	46.5701	39.7193	51.1599	33.1749	52.3642	61.3605	33.9853	44.4744	37.67	37.4313	43.0615	40.6978	40.5238	43.8466	68.9524	33.5707	41.3753	64.0503	38.6006	42.4075	79.1208	43.1241	51.8806	40.8021	23.8208	27.2339
ENSMUSG00000002033	Cd3g	54.6998	18.9262	59.1446	13.4068	14.3493	13.1841	14.0368	17.6985	28.0102	9.93761	21.7629	17.377	13.7495	21.3178	17.1389	9.93761	13.5837	13.1767	9.93761	13.8809	9.93761	9.93761	13.5127	13.2947	14.9269	13.6537	17.5405
ENSMUSG00000002043	Trappc6a	99.2628	110.766	87.6001	110.548	76.2255	68.8031	142.481	105.723	85.1821	141.677	106.148	65.0702	118.378	102.751	66.81	146.41	63.3342	56.3415	114.604	97.2741	43.4583	155.626	81.0858	58.016	85.4256	60.7285	43.9942
ENSMUSG00000002052	Supt6	2571.72	2899.25	1867.67	3235.42	4065.24	2518.81	2800.65	2849.6	2242.37	2961.66	2847.06	2334.23	2596.26	3050.13	2385.01	2546.24	3354.13	2717.47	2130.08	3816.21	2516.88	2579.27	3471.39	2133.2	2788.15	3760.07	2471.66
ENSMUSG00000002055	Spag5	131.047	133.329	73.4259	39.8389	73.4641	59.7932	38.8828	54.6526	33.2282	219.878	162.464	79.1415	230.803	202.858	102.627	56.4763	47.14	61.2597	64.0503	75.7009	68.1481	72.4057	76.2797	56.2676	85.4256	98.7774	50.8893
ENSMUSG00000002057	Foxn1	15.5658	17.4019	9.93761	17.9706	23.051	13.1841	16.1572	22.2414	9.93761	16.7707	15.2244	17.377	15.6976	16.2148	17.1389	18.1865	36.762	18.5256	17.2759	20.707	9.93761	9.93761	19.5543	16.3947	29.9153	49.2228	13.8362
ENSMUSG00000002058	Unc119	63.0796	80.549	107.347	45.5352	62.3741	160.758	97.8733	111.728	209.474	74.2259	115.402	157.262	64.8506	94.1583	106.698	37.8435	60.3203	96.0819	51.1949	88.2081	146.49	106.943	93.5446	138.692	19.9208	52.3779	64.4802
ENSMUSG00000002059	Rab34	166.821	218.998	232.52	106.927	213.374	308.144	141.278	203.162	327.417	134.214	226.892	298.759	124.761	260.072	266.612	98.377	164.115	294.24	82.052	213.207	345.766	140.158	241.75	318.812	105.659	140.543	176.399
ENSMUSG00000002064	Sdf2	537.599	450.82	344.31	443.368	387.198	250.512	487.73	417.813	313.411	647.991	386.792	330.64	574.512	396.285	294.889	582.792	410.119	302.211	521.533	476.71	279.07	607.052	395.142	254.306	499.964	348.302	345.841
ENSMUSG00000002068	Ccne1	41.9405	34.0508	53.3818	30.0549	31.6778	50.7036	22.7089	24.323	44.4744	61.8966	58.5782	76.9832	76.7106	43.0995	72.9867	31.7284	32.4946	96.8867	30.1018	36.1898	77.2692	53.2158	25.4544	58.016	35.4323	38.5534	54.3069
ENSMUSG00000002076	Hsf2bp	53.6468	49.9138	24.1619	32.0554	36.8637	19.6446	48.9831	38.5858	22.4783	69.4952	45.2297	21.6926	50.687	40.5238	28.5152	94.5954	36.762	22.6886	89.4244	45.7202	22.4343	63.4132	38.0922	25.2962	82.0426	31.9561	19.0982
ENSMUSG00000002083	Bbc3	38.6902	57.65	64.8747	46.4769	81.7384	67.9865	52.7171	72.1059	51.7843	43.5944	49.0724	57.4369	74.56	91.7001	71.9587	45.7788	40.9515	70.224	28.9298	65.414	53.8409	60.0257	71.463	83.9739	54.7603	40.7121	46.3031
ENSMUSG00000002100	Mybpc3	21.3559	29.3131	31.641	24.8835	30.1651	17.3959	16.1572	18.9056	13.9743	23.0069	26.2037	15.7139	26.7514	39.2283	28.5152	47.738	24.682	46.4118	40.2821	19.217	28.3216	19.1059	25.4544	27.2748	31.7763	18.616	19.0982
ENSMUSG00000002102	Psmc3	683.14	829.79	640.321	666.971	731.158	636.87	637.412	840.778	651.736	990.483	1036.85	745.912	835.59	967.497	721.726	693.192	813.446	557.155	705.49	970.824	572.612	833.672	751.86	562.242	791.877	998.828	722.772
ENSMUSG00000002103	Acp2	404.246	246.797	431.829	450.553	320.682	532.116	516.471	473.142	545.594	406.616	333.511	384.827	384.207	294.136	401.89	372.241	186.697	332.497	385.355	263.705	447.264	734.667	369.586	486.768	249.617	121.214	164.275
ENSMUSG00000002104	Rapsn	22.6347	28.1004	42.6833	17.9706	33.1749	39.7761	9.93761	26.3348	35.7717	9.93761	37.4313	31.6146	15.6976	29.9424	29.6571	16.8046	31.4111	26.4995	15.6382	27.484	28.3216	15.8406	36.0538	39.4102	9.93761	35.2816	27.2339
ENSMUSG00000002105	Slc39a13	181.112	231.83	295.881	181.816	298.958	292.138	240.925	221.92	284.227	148.203	184.567	208.375	175.716	224.776	316.092	127.603	294.543	251.186	113.557	251.364	256.167	111.379	276.8	260.249	137.561	304.771	173.093
ENSMUSG00000002107	Celf2	656.679	958.942	1412.67	693.908	1252.74	915.114	498.508	1229.63	530.429	192.903	1233.3	428.381	407.471	1182.58	829.664	361.944	928.942	927.473	237.654	1041.4	759.609	270.284	692.258	525.778	550.011	1328.57	1030.39
ENSMUSG00000002108	Nr1h3	81.7522	35.2138	135.451	56.7358	58.8895	53.193	45.2243	50.2399	73.334	31.5981	43.2963	46.412	37.3069	36.6188	74.0141	42.8238	34.6402	71.8483	26.5451	36.1898	57.9487	47.4927	49.0772	61.5034	35.4323	29.6983	21.9714
ENSMUSG00000002109	Ddb2	201.518	187.973	212.942	255.585	210.655	282.534	302.058	238.968	245.692	191.042	214.935	201.99	205.387	161.422	198.91	183.962	112.952	172.178	223.081	186.255	243.218	291.208	249.33	257.702	114.066	90.5957	90.182
ENSMUSG00000002111	Spi1	155.585	37.5207	212.942	91.51	62.3741	30.1947	14.0368	105.723	70.9568	16.7707	21.7629	25.5675	110.925	57.0244	98.5527	31.7284	33.5707	164.188	18.7699	22.1349	45.5516	42.8689	53.9898	77.9489	56.483	13.6537	53.1695
ENSMUSG00000002129	Sf3a1	613.934	524.49	581.688	537.666	478.802	725.624	769.117	696.118	683.227	868.899	676.967	510.165	677.045	593.203	577.461	625.831	476.701	506.178	485.153	652.638	622.348	799.571	605.216	593.617	570.03	896.664	823.85
ENSMUSG00000002147	Stat6	726.901	1104.1	873.902	750.474	1303.61	846.355	922.364	1221.12	905.982	680.479	821.107	620.611	646.392	1053.77	805.454	524.781	1015.07	628.039	494.508	1120.94	711.867	843.573	1327.02	834.419	413.204	863.283	324.951
ENSMUSG00000002190	Clgn	18.65	9.93761	21.8734	488.274	67.2359	63.8964	681.714	175.007	118.156	9.93761	13.4515	17.377	17.3553	14.0727	15.5357	20.7215	18.432	16.1484	17.2759	13.8809	9.93761	29.7549	15.3213	20.0315	9.93761	15.5452	24.6581
ENSMUSG00000002204	Napsa	66.206	28.1004	77.2136	24.8835	23.8775	14.8024	16.1572	21.1647	25.3005	21.852	13.4515	17.377	22.9741	19.73	27.3604	24.2152	13.5837	29.2372	28.9298	15.9075	21.1789	19.1059	24.329	23.2588	28.025	13.6537	15.836
ENSMUSG00000002205	Vrk3	292.227	357.914	228.792	364.322	330.865	220.08	400.299	414.407	244.524	311.884	336.267	177.505	308.055	342.785	215.085	511.681	245.543	216.088	477.877	317.538	221.3	326.441	343.081	229.681	349.789	188.257	168.684
ENSMUSG00000002210	Smg9	221.913	245.728	218.536	138.557	237.836	171.187	136.465	196.338	163.866	194.764	202.975	155.13	179.957	257.638	204.976	265.503	253.385	194.539	250.143	307.446	182.422	151.208	190.562	150.617	201.159	242.992	154.35
ENSMUSG00000002221	Paxip1	285.096	423.058	334.067	275.362	432.663	359.352	330.817	351.406	279.556	369.471	485.062	386.951	303.824	401.149	364.546	291.726	551.107	425.722	325.044	543.948	335.813	269.182	375.265	334.085	298.043	514.266	457.957
ENSMUSG00000002222	Rmnd5a	2072.12	1325.03	1285.19	1359.18	1199.16	1685.8	1441.93	1433.83	1681.47	4066.94	1679.43	1690.86	2551.88	1346.62	1397.56	3143.01	1010.18	1500	2757.66	1608.26	1896.33	3484.49	1306.21	1712.72	4434.15	1467.15	1952.07
ENSMUSG00000002227	Mov10	342.134	266.036	337.792	269.07	189.579	232.895	372.748	202.309	204.799	339.751	158.779	183.894	437.077	222.341	266.612	282.362	213.186	213.694	338.563	132.269	206.352	460.715	238.908	306.932	294.704	255.148	130.063
ENSMUSG00000002228	Ppm1j	68.2865	46.5701	55.307	50.2263	52.5847	34.6089	48.9831	33.0525	25.3005	108.987	37.4313	38.5462	93.8543	45.658	67.841	94.5954	31.4111	44.7398	80.9973	30.0289	42.4075	93.6125	53.0101	70.1791	85.4256	30.832	30.9665
ENSMUSG00000002233	Rhoc	510.116	291.682	539.806	649.911	372.267	619.278	642.201	382.057	649.403	953.358	323.405	556.894	689.729	317.246	429.138	960.744	254.365	495.026	924.756	285.016	479.101	1128.47	379.998	463.869	915.3	252.109	490.926
ENSMUSG00000002249	Tead3	213.756	241.452	294.018	437.081	334.937	704.835	582.332	345.445	584.086	179.873	160.622	403.949	187.376	215.036	443.265	246.767	201.415	452.011	216.834	218.82	529.837	311.027	308.997	500.337	189.455	143.592	195.127
ENSMUSG00000002250	Ppard	609.863	418.786	464.411	445.165	460.482	402.55	384.727	453.565	383.433	423.33	325.242	317.889	520.598	429.11	445.284	396.576	305.32	430.502	296.961	375.836	340.79	335.248	415.964	329.842	456.586	369.558	331.548
ENSMUSG00000002257	Def6	159.672	116.144	180.293	143.97	103.012	153.534	154.506	121.156	173.227	151	101.516	132.728	146.012	123.569	127.018	107.818	38.8647	96.8867	85.2137	69.9935	151.484	179.91	128.832	188.047	56.483	27.3961	32.1858
ENSMUSG00000002265	Peg3	152.52	167.632	653.35	691.214	232.401	1223.72	321.231	185.248	619.078	103.37	157.857	514.413	322.865	318.463	929.528	156.743	194.547	1054.09	138.65	222.187	991.344	105.833	193.408	945.484	231.241	240.966	657.947
ENSMUSG00000002266	Zim1	40.8608	15.7325	109.223	223.211	27.8596	146.307	108.748	26.3348	131.065	24.1357	16.7239	25.5675	44.0529	14.0727	53.3243	32.762	17.0031	103.32	22.8209	17.6362	98.4272	24.6715	13.5127	74.4994	37.2349	13.6537	33.3954
ENSMUSG00000002274	Metrn	163.757	67.5052	78.1596	30.0549	36.8637	183.217	26.9899	48.4663	79.2652	206.858	70.8024	67.2425	244.565	54.5146	89.3724	81.3301	31.4111	66.9708	72.543	36.1898	74.2336	84.7025	47.101	60.6326	221.216	18.616	59.9711
ENSMUSG00000002279	Lmf1	186.215	216.859	201.751	158.396	169.171	139.078	228.932	222.773	167.377	134.214	225.053	160.459	136.454	286.838	163.501	157.682	127.733	112.154	170.995	200.856	143.492	173.289	234.17	143.804	140.914	148.672	79.0427
ENSMUSG00000002280	Narfl	146.388	130.109	149.475	91.51	110.537	136.667	173.73	156.222	163.866	171.494	153.249	112.422	184.196	122.346	144.257	138.89	114.924	96.8867	130.293	142.404	115.481	168.875	139.294	124.198	124.142	119.177	68.9739
ENSMUSG00000002289	Angptl4	1205.18	1234.31	1478.73	641.83	1411.45	2724.26	438.627	1392.14	2276.18	1703.24	1012.98	2034.84	1135.75	819.245	1374.36	2107.55	1777.49	2345.63	1725.89	1721.4	2960.4	1193.37	1113.23	1876.34	2472.96	1483.33	2633.14
ENSMUSG00000002297	Dbf4	170.905	176.199	137.321	133.142	147.383	112.529	122.014	116.872	99.3402	257.993	298.595	132.728	193.734	188.24	131.077	137.95	194.547	139.398	148.047	251.364	112.475	119.136	126.928	92.5602	130.854	230.834	190.722
ENSMUSG00000002307	Daxx	251.472	279.928	296.812	280.755	260.252	280.933	276.89	266.236	278.389	266.357	333.511	282.816	341.904	474.088	335.273	221.467	249.464	278.296	186.629	309.688	251.187	347.357	321.306	284.866	381.498	591.159	307.358
ENSMUSG00000002308	Cd320	206.617	120.443	108.285	94.2343	44.0844	64.7154	136.465	79.0324	87.5455	414.973	113.552	109.211	375.747	122.346	98.5527	178.333	49.1844	58.8036	142.827	53.8891	68.1481	251.559	79.1645	94.275	171.055	55.5189	85.7312
ENSMUSG00000002319	Ipo4	703.494	807.374	643.113	691.214	761.004	815.173	896.025	721.647	752.038	931.083	786.221	718.304	856.728	1011.24	886.153	738.098	889.791	757.056	704.45	895.762	805.361	935.975	804.839	722.501	891.95	1128.3	692.008
ENSMUSG00000002320	Tm9sf1	563.044	704.902	569.589	581.667	761.682	692.042	733.198	751.431	725.214	680.479	731.135	642.911	614.681	864.207	712.646	664.189	800.721	592.199	599.485	976.426	636.273	839.172	756.591	630.079	620.073	779.323	559.057
ENSMUSG00000002324	Rec8	27.4731	38.6659	29.5605	20.4268	32.4281	25.6124	21.2029	23.2926	13.9743	24.1357	47.1547	46.412	37.3069	51.9968	37.4072	23.0791	51.2216	39.681	31.2626	36.1898	31.6739	17.5467	37.0752	37.5936	54.7603	56.5631	58.841
ENSMUSG00000002325	Irf9	350.281	543.707	462.549	470.312	358.693	427.346	476.952	429.73	348.425	370.4	603.515	561.142	535.399	790.08	631.941	467.701	472.785	492.637	398.871	524.898	417.415	505.83	458.551	418.069	728.495	1252.71	748.042
ENSMUSG00000002326	Gmpr2	145.366	181.551	195.222	183.617	218.811	203.255	183.336	199.75	203.63	185.458	214.935	186.024	174.656	162.642	211.042	137.95	176.881	234.437	142.827	213.207	177.435	167.771	214.267	187.197	139.237	183.186	175.297
ENSMUSG00000002329	Mdp1	124.904	87.0439	140.127	109.643	89.9874	116.557	122.014	116.872	136.927	116.469	93.1675	103.856	111.99	76.9127	100.59	109.705	67.3416	85.6051	119.836	93.8767	103.448	207.48	91.6307	104.551	68.4625	69.0151	67.8518
ENSMUSG00000002332	Dhrs1	204.577	142.984	214.807	185.418	159.641	340.951	254.114	183.541	216.486	293.304	166.15	261.554	251.975	169.958	197.899	243.957	93.1936	184.958	189.754	144.655	206.352	281.297	193.408	235.625	283.016	113.064	164.275
ENSMUSG00000002341	Ncan	13.6667	15.7325	9.93761	9.93761	12.8948	9.93761	14.0368	9.93761	9.93761	13.4737	22.9076	15.7139	13.7495	9.93761	18.6002	20.7215	17.0031	9.93761	17.2759	15.9075	15.4877	13.8391	13.5127	13.2947	19.9208	18.616	19.0982
ENSMUSG00000002342	Tmem161a	156.607	176.199	214.807	171.91	147.383	214.472	240.925	241.525	272.551	209.648	179.043	188.153	168.294	218.689	157.426	201.781	120.838	119.373	177.249	151.407	171.449	262.574	206.683	166.787	103.976	88.5477	86.8444
ENSMUSG00000002343	Armc6	79.6859	88.125	105.469	69.6259	81.05	75.3227	78.4706	85.9392	89.9073	74.2259	78.279	63.9828	81.006	92.9294	76.0673	77.5291	107.032	91.2501	89.4244	100.669	80.3007	60.0257	68.5669	76.2248	100.609	187.243	124.537
ENSMUSG00000002345	Borcs8	149.454	171.916	157.885	146.676	130.34	157.547	218.137	208.278	229.338	178.943	154.17	129.525	151.32	168.739	144.257	128.544	107.032	97.6913	119.836	149.156	123.492	194.249	168.74	149.765	142.589	101.842	75.692
ENSMUSG00000002346	Slc25a42	123.88	112.918	162.555	77.8552	88.614	172.792	97.8733	103.147	135.755	100.559	101.516	142.333	77.7852	112.555	146.284	86.0738	75.3264	134.595	97.8314	73.42	167.457	102.503	93.5446	151.468	44.33	63.8421	72.336
ENSMUSG00000002365	Snx9	597.649	431.6	689.645	877.967	602.274	623.276	721.225	661.228	658.734	615.503	560.359	555.832	571.341	564.034	650.1	879.359	491.387	654.321	665.999	574.203	663.13	703.864	477.478	532.562	703.475	618.474	677.725
ENSMUSG00000002372	Ranbp3	450.058	541.572	453.24	439.776	523.58	456.94	566.765	455.267	564.257	458.613	429.96	449.624	490.997	539.725	540.131	416.231	619.633	495.823	465.403	704.178	516.905	558.642	521.006	484.224	468.265	744.929	520.597
ENSMUSG00000002379	Ndufa11	194.377	202.954	218.536	187.218	130.34	163.165	222.935	181.835	271.383	281.225	211.255	205.183	225.509	194.331	186.774	155.804	151.342	136.196	168.91	157.031	180.427	249.355	123.121	204.195	154.316	143.592	148.833
ENSMUSG00000002384	Bmp8b	98.2348	51.0241	61.0578	59.5101	43.3692	38.9222	71.1588	55.532	50.5725	118.339	59.5229	55.2454	123.698	58.2766	56.4528	70.8617	60.3203	44.7398	69.3635	52.7285	39.2359	80.238	56.9216	52.7601	80.3495	66.9481	42.835
ENSMUSG00000002393	Nr2f6	298.339	325.869	226.927	284.35	299.637	230.493	599.096	358.217	243.356	358.326	257.235	267.933	444.478	397.501	251.461	346.967	286.704	203.319	364.56	328.75	241.226	476.12	308.997	238.173	358.134	233.873	166.48
ENSMUSG00000002395	Use1	473.471	680.35	560.282	426.303	704.704	526.518	511.681	897.789	812.684	549.594	882.617	686.449	516.37	692.86	552.238	420.91	618.654	425.722	361.44	911.447	620.358	536.638	624.139	480.831	298.043	433.317	356.835
ENSMUSG00000002396	Ocel1	346.207	439.075	318.235	388.577	496.442	277.731	607.477	424.623	269.048	389.901	327.998	295.57	443.421	446.13	321.14	386.281	379.761	314.964	474.759	420.672	282.058	434.305	432.053	293.353	429.89	294.645	227.055
ENSMUSG00000002409	Dyrk1b	378.792	300.23	274.455	240.299	175.295	307.344	302.058	233.002	294.734	384.33	140.338	214.759	379.977	239.383	279.742	547.238	177.863	234.437	593.249	172.771	267.121	316.532	208.579	339.176	468.265	166.951	116.795
ENSMUSG00000002413	Braf	1236.72	1177.74	931.596	1523.46	1393.81	1376.41	1240.81	1052.65	1001.61	1277.26	1020.32	1118.6	1052.25	999.091	954.746	1599.64	1460.39	1206.98	1610.56	1276.66	1114.67	1352.86	1053.64	1108.26	1213.84	1156.62	1291.85
ENSMUSG00000002416	Ndufb2	278.984	347.233	265.138	339.166	270.439	219.279	371.55	290.941	271.383	327.676	307.784	291.319	297.476	288.054	221.149	353.519	297.482	184.958	389.513	307.446	209.342	324.239	255.961	209.293	227.899	238.939	277.665
ENSMUSG00000002428	Hltf	464.31	397.429	412.279	471.21	460.482	592.091	411.079	492.719	455.77	503.177	519.039	405.011	462.452	427.895	375.649	478.931	294.543	361.185	563.108	364.626	438.31	619.153	530.468	493.552	446.575	275.405	233.658
ENSMUSG00000002455	Prpf6	512.152	502.07	443.931	498.153	461.161	512.123	667.346	587.19	521.097	673.982	479.552	400.762	621.023	480.166	384.733	616.475	504.115	363.576	487.232	495.761	439.305	902.974	601.431	505.425	469.933	565.866	405.201
ENSMUSG00000002458	Rgs19	114.659	126.888	155.082	74.2019	81.05	147.111	94.2432	130.574	147.474	94.9325	113.552	129.525	86.3656	89.2404	129.048	42.8238	91.2132	108.943	52.2737	85.9381	125.493	85.8175	83.0058	146.359	54.7603	110.005	102.396
ENSMUSG00000002459	Rgs20	129	164.419	50.4843	72.3729	163.045	34.6089	69.9375	97.9917	34.5042	126.746	170.755	71.5781	104.529	154.103	58.5321	223.341	149.376	55.5194	181.418	139.026	42.4075	98.0599	143.096	37.5936	119.106	108.985	39.3343
ENSMUSG00000002475	Abhd3	58.8985	52.1325	58.1867	34.0295	43.3692	112.529	33.7042	40.4025	76.8946	52.3245	42.3261	99.5689	51.7851	41.814	85.285	45.7788	49.1844	72.6598	54.4265	58.5147	84.3374	52.0753	40.1147	70.1791	54.7603	47.11	85.7312
ENSMUSG00000002477	Snrpd1	167.842	261.761	174.693	253.787	262.29	205.659	167.724	243.229	214.148	399.187	488.735	258.365	299.592	303.867	204.976	170.825	372.906	237.627	174.122	385.925	226.283	224.013	223.745	164.235	189.455	563.842	612.898
ENSMUSG00000002486	Tchp	114.659	104.307	123.283	93.3264	103.696	139.078	106.333	92.8309	119.33	83.656	89.4518	100.641	127.952	116.228	122.958	116.304	121.824	125.785	116.697	111.97	114.479	127.992	129.783	139.544	117.426	115.102	61.1
ENSMUSG00000002489	Tiam1	442.932	582.14	454.171	331.978	769.822	798.383	240.925	902.895	553.759	225.457	478.634	1176.99	168.294	635.74	843.786	118.188	602.013	1058.86	104.127	843.106	1048.03	99.1711	621.3	546.978	172.728	548.666	1480.8
ENSMUSG00000002496	Tsc2	1033.21	791.363	960.442	1053.94	926.505	1399.6	1497	1164.97	1374.78	1193.74	846.813	1068.69	1040.63	961.421	1146.4	1030.9	532.507	944.196	864.486	894.642	1203.18	1347.36	1012.96	1193.04	951.993	686.255	618.392
ENSMUSG00000002500	Rpl3l	17.1791	15.7325	20.6831	15.1536	20.4782	16.1637	16.1572	16.4093	16.057	13.4737	19.3652	18.8954	22.9741	18.0487	25.0028	13.4898	17.0031	20.6714	18.7699	20.707	18.5208	9.93761	19.5543	24.2861	14.9269	18.616	13.8362
ENSMUSG00000002504	Slc9a3r2	435.806	294.888	656.142	338.268	294.205	344.951	590.714	610.168	460.437	427.044	347.292	340.204	420.159	429.11	511.88	311.39	125.764	334.888	378.077	237.899	373.632	677.461	415.964	518.146	162.687	133.425	178.603
ENSMUSG00000002524	Puf60	844.95	836.194	793.873	900.412	801.023	1064.62	1115.11	1053.5	1225.52	1060.09	922.093	887.133	997.296	949.27	894.223	987.873	773.314	858.989	869.682	978.666	933.661	1041.57	798.216	871.724	1000.36	936.113	946.896
ENSMUSG00000002546	Golga2	1085.11	849.003	808.762	1022.51	990.261	793.586	1141.45	1123.27	831.344	1474.01	848.649	726.799	1373.54	949.27	750.98	1244.18	624.528	647.153	1105.56	876.716	679.044	1599.25	1094.31	685.194	1045.39	679.174	403.003
ENSMUSG00000002550	Uck1	258.606	197.604	135.451	213.316	236.477	191.233	282.883	299.458	204.799	310.027	204.815	150.865	328.154	224.776	182.728	266.44	156.255	148.998	256.387	239.021	161.469	418.898	273.011	163.384	157.665	169.995	143.315
ENSMUSG00000002565	Scin	673.981	555.451	268.865	234.004	488.979	126.215	186.938	368.435	190.77	792.79	409.754	204.119	673.874	308.733	192.843	804.519	741.992	198.53	802.136	645.915	161.469	407.893	311.838	113.954	1090.42	1303.29	252.364
ENSMUSG00000002578	Ikzf4	218.854	156.92	203.616	474.803	339.689	803.18	589.516	345.445	559.591	199.416	160.622	654.592	184.196	204.076	486.655	173.641	170.008	566.712	154.308	214.329	602.454	293.41	327.933	373.959	107.341	77.2592	497.52
ENSMUSG00000002580	Mien1	173.967	189.044	119.536	210.617	203.858	89.1157	274.493	235.559	147.474	279.367	174.439	92.0564	214.92	156.543	102.627	236.461	132.655	77.5225	264.711	192.995	83.3287	346.256	207.631	94.275	209.517	173.04	86.8444
ENSMUSG00000002588	Pon1	28.6366	13.7713	16.7818	13.4068	15.565	9.93761	16.1572	9.93761	9.93761	18.1446	13.4515	20.3245	18.8684	14.0727	9.93761	25.33	21.0573	9.93761	34.6919	13.8809	13.6175	9.93761	9.93761	13.2947	35.4323	9.93761	13.8362
ENSMUSG00000002602	Axl	1258.09	274.585	2533.87	722.64	310.499	3717.95	590.714	238.116	3607.86	716.679	236.088	3305.66	642.164	234.515	2949.83	336.669	155.273	2378.27	172.037	186.255	2874.88	183.219	124.073	2783.42	648.431	312.87	2815.5
ENSMUSG00000002603	Tgfb1	977.241	356.846	856.221	587.953	335.616	387.352	635.017	446.755	437.104	1048.95	418.939	683.263	864.127	398.717	836.725	854.101	211.225	843.858	554.793	231.166	569.628	968.975	337.4	686.89	860.261	200.426	556.859
ENSMUSG00000002608	Ccdc97	399.155	385.682	338.723	428.099	385.84	353.752	599.096	439.094	383.433	433.544	361.071	309.387	412.757	457.07	448.311	442.435	430.682	418.552	444.613	393.772	330.837	531.136	408.393	407.042	494.959	544.619	339.245
ENSMUSG00000002617	Zfp40	68.2865	64.2289	87.6001	63.1977	64.4599	96.3941	71.1588	66.8944	63.8043	125.812	95.9521	63.9828	99.1948	49.4697	52.2787	123.838	45.0873	63.7104	134.472	46.8945	72.2074	96.9485	78.2033	89.9865	102.293	54.4733	25.957
ENSMUSG00000002625	Akap8l	325.839	395.293	393.659	419.117	375.661	438.544	452.999	443.35	418.436	246.84	319.729	359.329	347.192	330.624	449.32	300.154	330.79	486.264	374.957	402.739	511.931	421.099	474.639	556.306	232.912	314.895	396.408
ENSMUSG00000002633	Shh	13.6667	9.93761	16.7818	9.93761	14.3493	20.7004	9.93761	26.3348	17.8368	9.93761	16.7239	20.3245	13.7495	9.93761	17.1389	13.4898	9.93761	21.6925	9.93761	9.93761	21.1789	9.93761	9.93761	16.3947	9.93761	9.93761	32.1858
ENSMUSG00000002635	Pdcd2l	68.2865	91.3665	91.3683	60.4331	73.4641	74.5089	74.8179	85.0767	67.3848	86.4786	92.2389	84.5293	81.006	96.615	59.5701	66.0842	78.3123	53.8725	80.9973	89.3425	70.1789	72.4057	89.716	71.9084	49.5684	75.2013	70.0953
ENSMUSG00000002658	Gtf2f1	349.262	438.007	327.548	358.932	469.303	401.75	375.144	439.094	362.428	509.675	651.259	600.434	471.967	526.355	516.925	342.286	467.89	582.642	325.044	597.734	449.254	380.378	491.672	396.015	388.174	822.82	693.107
ENSMUSG00000002660	Clpp	122.856	106.461	111.099	89.6927	81.7384	135.059	172.529	129.718	160.354	158.455	136.647	126.32	183.137	123.569	134.12	99.3219	107.032	92.0558	91.5278	97.2741	119.487	186.528	119.312	121.638	82.0426	123.25	100.178
ENSMUSG00000002661	Alkbh7	38.6902	38.6659	55.307	35.9824	29.4019	43.1689	38.8828	53.7722	54.2015	58.0797	51.9372	65.0702	57.2511	55.7704	63.7123	31.7284	32.4946	40.5293	39.1737	42.1782	41.3537	63.4132	45.1171	69.3138	33.6139	43.9237	41.6722
ENSMUSG00000002664	Pspn	13.6667	20.3612	19.45	13.4068	20.4782	9.93761	16.1572	16.4093	19.4663	13.4737	29.3629	30.4315	15.6976	21.3178	23.7935	13.4898	18.432	20.6714	13.7122	17.6362	22.4343	13.8391	20.8034	22.2107	9.93761	18.616	17.5405
ENSMUSG00000002668	Dennd1c	86.9114	113.993	97.0138	158.396	124.882	35.4782	126.834	124.582	42.0121	62.8488	75.4784	30.4315	75.6356	122.346	57.493	171.764	138.559	64.5262	118.79	125.507	37.1023	100.282	151.648	52.7601	112.385	115.102	36.9773
ENSMUSG00000002679	Med6	131.047	146.201	140.127	144.872	162.364	161.56	182.135	149.386	159.184	183.597	254.477	150.865	130.078	185.803	150.337	173.641	214.167	128.189	180.376	214.329	128.495	163.356	163.994	119.931	135.885	212.591	213.846
ENSMUSG00000002688	Prkd1	126.952	60.9443	153.213	170.109	80.3613	280.933	141.278	74.706	208.305	178.012	66.1138	191.347	79.9329	59.5273	166.538	377.857	71.3384	192.144	331.284	75.7009	253.179	416.697	80.1253	260.249	115.746	65.9136	224.854
ENSMUSG00000002699	Lcp2	199.477	71.8629	299.607	121.4	114.638	39.7761	24.1686	179.274	74.5216	21.852	19.3652	25.5675	101.329	57.0244	132.091	42.8238	44.0575	256.768	21.5204	37.3982	75.2459	30.9867	46.1101	88.2697	61.632	28.5536	55.4426
ENSMUSG00000002718	Cse1l	972.153	1333.57	974.4	1061.12	1524.71	1058.22	1058.84	1117.32	1000.44	1367.29	1804.28	1323.51	1114.61	1312.59	1088.9	999.098	1754	1319.25	950.735	1853.59	1231.02	1122.97	1308.1	948.028	1020.37	1942.53	1885.06
ENSMUSG00000002728	Naa20	318.71	294.888	232.52	300.528	259.573	253.715	233.729	203.162	218.823	380.615	323.405	295.57	357.768	249.12	220.138	435.884	404.244	258.363	660.802	230.044	213.328	253.762	256.908	242.419	314.737	553.725	353.537
ENSMUSG00000002731	Prkra	174.988	212.581	182.159	159.297	127.611	195.241	159.313	207.426	260.874	228.247	196.533	175.375	203.269	167.519	150.337	170.825	79.3068	113.759	167.867	119.869	166.459	240.542	182.025	199.946	115.746	60.7285	95.738
ENSMUSG00000002732	Fkbp7	55.7513	34.0508	213.874	111.453	39.0481	284.134	82.1177	48.4663	236.347	38.6655	25.1237	181.765	68.0935	25.7621	198.91	36.8369	32.4946	181.763	31.2626	22.1349	181.425	37.0044	32.959	174.442	83.7345	22.5819	218.249
ENSMUSG00000002733	Plekha3	370.646	177.269	451.378	442.47	209.296	502.526	467.371	240.673	446.437	440.043	194.693	498.482	340.846	194.331	429.138	476.123	187.678	465.553	422.782	200.856	472.137	493.726	184.871	429.944	428.221	236.913	809.567
ENSMUSG00000002741	Ykt6	467.364	615.233	530.498	576.28	811.198	504.925	500.903	570.169	493.101	649.848	689.821	599.372	518.484	728.102	526.006	599.634	926.985	591.403	524.652	1180.32	505.962	563.043	621.3	364.628	626.746	1210.23	865.598
ENSMUSG00000002748	Baz1b	1102.4	1032.59	1336.37	1263.12	1181.53	1739.36	1403.63	1358.11	1634.83	1542.69	1199.33	1161.07	1320.69	1152.2	1193.81	1132.87	1328.27	1310.49	1130.5	1179.2	1382.19	2248.2	1256.07	1508.41	992.021	1420.62	1289.65
ENSMUSG00000002763	Pex6	227.01	276.723	286.566	246.594	291.489	355.352	431.441	479.1	360.095	277.509	267.347	280.69	223.391	378.048	288.83	251.452	169.026	216.885	206.421	212.084	295.996	322.037	337.4	259.4	212.86	166.951	120.114
ENSMUSG00000002767	Mrpl2	148.432	168.703	145.737	140.362	104.381	118.972	221.736	157.076	160.354	170.563	157.857	114.562	166.173	171.177	133.105	141.71	109.993	81.5668	140.739	133.395	114.479	222.911	134.539	126.757	102.293	108.985	73.4553
ENSMUSG00000002768	Mea1	172.947	156.92	158.819	167.406	131.704	145.504	215.738	152.804	207.136	255.205	202.975	161.525	227.627	151.662	141.217	183.024	155.273	111.351	186.629	178.39	148.487	228.421	144.997	148.062	177.747	178.113	119.008
ENSMUSG00000002769	Gnmt	20.0331	30.5128	13.479	19.2276	26.2919	19.6446	17.9712	20.056	13.9743	16.7707	31.4189	30.4315	15.6976	28.5687	26.1906	25.33	29.2178	29.2372	18.7699	23.5173	31.6739	21.9819	28.735	24.2861	17.5991	23.8208	34.5965
ENSMUSG00000002771	Grin2d	44.0903	37.5207	62.9678	82.4138	39.7724	79.3869	147.292	52.0083	70.9568	53.2866	25.1237	54.1475	60.5144	35.3033	57.493	46.7594	38.8647	73.4711	54.4265	31.2807	71.1934	63.4132	32.959	82.2538	54.7603	36.3774	61.1
ENSMUSG00000002778	Kdelr1	682.122	602.423	737.107	642.727	581.244	804.779	858.911	780.363	1002.78	1076.8	729.299	727.861	823.964	843.549	767.121	817.616	470.827	479.892	588.052	633.59	677.055	1195.57	709.287	663.996	840.246	469.746	500.816
ENSMUSG00000002781	Tmem143	86.9114	63.135	78.1596	57.6615	68.6219	67.9865	102.709	84.214	100.518	68.5475	70.8024	63.9828	75.6356	81.8503	60.6071	67.0409	44.0575	48.078	70.424	57.3606	65.0969	98.0599	83.9653	64.1119	54.7603	40.7121	38.1585
ENSMUSG00000002791	Pdxk-ps	17.1791	9.93761	9.93761	15.1536	16.6604	9.93761	16.1572	13.3017	9.93761	15.2595	16.7239	9.93761	17.3553	18.0487	17.1389	18.1865	15.4339	13.1767	17.2759	9.93761	9.93761	17.5467	15.3213	9.93761	14.9269	13.6537	15.836
ENSMUSG00000002797	Ggct	123.88	75.1243	92.3098	69.6259	66.5424	68.8031	51.4748	79.0324	43.2452	118.339	93.1675	127.388	77.7852	89.2404	98.5527	103.1	58.3065	90.4442	110.415	46.8945	85.3456	88.0464	78.2033	101.128	49.5684	49.2228	52.0303
ENSMUSG00000002799	Jag2	602.738	147.273	1116.77	147.578	114.638	2239.81	113.575	125.438	2178.23	353.683	113.552	2339.54	135.391	105.204	1807.06	64.1688	32.4946	1256.34	72.543	69.9935	1984.84	66.7916	83.0058	2029.78	68.4625	37.4678	459.056
ENSMUSG00000002803	Btbd6	98.2348	150.489	127.028	92.4183	135.114	190.432	146.089	194.632	266.713	99.6215	117.251	149.799	115.185	168.739	137.162	90.8104	96.1622	129.791	104.127	119.869	181.425	112.488	178.23	228.831	85.4256	65.9136	67.8518
ENSMUSG00000002804	Nudt14	92.0625	71.8629	66.779	92.4183	41.935	79.3869	149.697	76.4375	106.403	86.4786	82.0081	73.7419	59.4278	73.2025	59.5701	80.3804	31.4111	35.3987	72.543	52.7285	51.779	109.161	45.1171	64.9802	39.0242	22.5819	27.2339
ENSMUSG00000002808	Epdr1	112.608	52.1325	169.091	91.51	36.8637	241.704	85.76	31.1705	228.17	98.6841	32.4353	184.959	120.506	31.3005	191.831	58.4048	18.432	144.999	46.8604	22.1349	206.352	44.0295	27.6548	176.994	207.846	18.616	175.297
ENSMUSG00000002812	Flii	1355.78	1263.13	1332.65	1454.34	1650.86	1548.3	1651.43	1520.62	1459.91	1566.82	1040.52	1016.67	1450.68	1315.02	1298.71	1914.86	1393.84	1199.81	1510.81	1377.49	1207.16	1613.55	1439.58	1204.91	1770.86	1522.78	790.89
ENSMUSG00000002814	Top3a	141.276	147.273	164.422	129.53	154.194	154.337	148.494	136.562	158.013	160.318	167.071	160.459	196.912	165.081	163.501	117.246	135.607	176.971	148.047	179.514	193.392	162.252	176.332	182.946	98.9246	142.575	138.9
ENSMUSG00000002820	Atg4d	257.587	331.21	249.297	363.424	388.555	238.501	449.406	306.272	241.02	257.993	224.133	186.024	302.766	258.855	248.43	332.924	462.994	314.964	312.563	375.836	228.275	375.976	351.601	260.249	278.007	403.969	238.06
ENSMUSG00000002825	Qtrt1	231.088	171.916	127.964	192.619	155.556	95.586	165.321	133.14	96.9839	403.83	193.772	198.798	335.558	168.739	166.538	347.903	229.857	157.794	313.603	192.995	133.496	323.138	165.892	142.952	298.043	232.86	177.501
ENSMUSG00000002831	Plin4	82.7847	58.7493	137.321	85.1454	83.1148	228.09	55.1954	46.6871	208.305	38.6655	44.2641	88.8325	50.687	71.9643	115.849	54.5437	95.1729	139.398	61.9192	53.8891	108.464	52.0753	82.046	150.617	70.1652	49.2228	66.7288
ENSMUSG00000002833	Hdgfrp2	309.543	233.968	307.989	206.118	195.699	356.952	256.511	201.456	255.035	317.458	226.892	284.942	350.365	234.515	323.159	310.454	236.72	333.294	283.438	206.47	272.1	385.881	222.798	335.782	246.276	253.122	217.149
ENSMUSG00000002835	Chaf1a	75.548	116.144	104.531	72.3729	72.7731	93.9694	101.501	75.5719	81.6335	162.181	155.092	84.5293	156.626	160.202	98.5527	71.8156	54.2657	61.2597	74.6596	85.9381	85.3456	105.833	84.9244	85.6929	71.8662	98.7774	63.3545
ENSMUSG00000002844	Adprh	108.505	80.549	176.559	130.433	61.678	175.198	106.333	124.582	191.94	155.66	70.8024	97.4238	153.442	69.4853	136.148	96.4866	37.8155	107.337	75.7171	58.5147	96.4174	115.812	63.7281	119.077	117.426	52.3779	86.8444
ENSMUSG00000002845	Tmem39a	475.507	471.107	435.553	384.984	402.806	400.951	308.05	374.394	374.098	401.045	413.428	390.138	413.815	403.58	444.275	429.333	593.202	448.824	389.513	647.035	410.45	298.916	364.853	349.357	565.025	434.329	579.935
ENSMUSG00000002846	Timmdc1	169.884	147.273	116.725	120.496	111.221	147.111	159.313	182.688	172.057	284.942	197.453	171.114	211.742	152.883	152.363	198.03	123.794	120.175	235.573	131.142	130.496	280.196	162.095	162.533	177.747	164.92	110.153
ENSMUSG00000002847	Pla1a	95.1498	25.6267	420.658	112.357	36.1312	64.7154	57.6662	39.4955	105.226	76.1149	19.3652	89.9075	167.234	29.9424	182.728	86.0738	22.2966	264.742	24.0875	19.217	164.463	32.2074	20.8034	139.544	301.382	25.0329	344.742
ENSMUSG00000002870	Mcm2	208.657	224.345	177.493	143.068	119.42	149.52	171.328	186.101	160.354	498.535	392.303	135.93	429.675	382.911	200.932	202.719	72.3362	85.6051	166.824	173.895	98.4272	307.724	149.748	101.984	154.316	133.425	57.7096
ENSMUSG00000002871	Tpra1	166.821	161.205	184.959	180.015	143.976	159.955	310.447	210.836	212.98	137.013	103.369	100.641	158.748	124.792	163.501	211.156	114.924	138.597	200.172	120.997	154.48	329.744	231.327	192.297	80.3495	86.4984	66.7288
ENSMUSG00000002881	Nab1	846.985	1012.31	915.776	982.112	1172.71	938.299	621.846	921.614	951.464	1653.13	1603.24	1009.24	875.753	1240.9	891.197	1488.32	1875.36	939.418	1218.83	2045.15	888.906	765.469	1018.63	761.503	2194.46	3889.53	1636.79
ENSMUSG00000002885	Adgre5	1182.79	522.355	1649.94	612.198	580.566	402.55	270.897	1078.18	421.937	696.259	357.397	244.542	866.241	511.77	1034.43	1430.33	311.198	882.879	1177.26	359.021	476.116	842.473	396.089	781.852	748.51	534.502	432.679
ENSMUSG00000002897	Il17ra	586.454	471.107	957.651	739.699	621.947	565.702	621.846	486.761	573.588	464.183	451.083	653.53	522.713	459.501	786.287	711.903	752.759	1111.42	593.249	727.707	695.953	423.3	469.907	523.234	675.119	600.264	984.249
ENSMUSG00000002900	Lamb1	2056.86	628.044	3470.83	1080.87	623.303	4885.9	790.668	798.232	4160.58	1744.08	887.207	5404.55	1168.51	582.265	4269.09	655.769	474.743	3665.79	262.63	593.252	4523.68	285.702	381.891	3157.27	1745.85	580.03	5159.69
ENSMUSG00000002908	Kcnn1	27.4731	28.1004	33.6919	26.9885	20.4782	41.4767	33.7042	28.2963	34.5042	32.6245	19.3652	37.4065	36.1666	28.5687	31.9094	28.5794	15.4339	35.3987	30.1018	22.1349	30.5665	48.6417	25.4544	30.1649	35.4323	22.5819	27.2339
ENSMUSG00000002910	Arrdc2	75.548	157.991	119.536	68.7093	139.887	99.625	113.575	126.294	87.5455	53.2866	88.5223	95.2776	95.9912	160.202	117.88	62.2507	76.3221	110.549	85.2137	82.5301	123.492	109.161	150.698	121.638	56.483	62.8051	65.605
ENSMUSG00000002930	Ppp1r17	13.6667	15.7325	9.93761	9.93761	21.3542	9.93761	9.93761	18.9056	9.93761	9.93761	22.9076	9.93761	13.7495	19.73	13.6478	9.93761	17.0031	9.93761	9.93761	17.6362	15.4877	13.8391	23.1823	13.2947	9.93761	13.6537	9.93761
ENSMUSG00000002944	Cd36	3480.36	448.685	9470.3	3098.96	1224.25	807.178	195.34	1347.9	1524.05	106.179	105.222	597.248	661.19	598.065	3304.86	461.151	248.484	5922.33	243.899	164.902	3931.98	140.158	363.907	4445.82	481.612	90.5957	2751.78
ENSMUSG00000002948	Map2k7	545.741	523.423	423.451	505.337	499.834	519.32	621.846	434.838	502.433	534.741	463.94	416.696	553.37	482.597	489.682	694.127	493.346	463.163	646.253	586.529	501.982	499.228	507.758	423.158	498.295	482.9	362.331
ENSMUSG00000002949	Timm44	264.719	299.161	256.752	304.122	243.95	216.876	328.42	244.081	246.86	331.391	301.352	234.97	293.244	264.939	222.16	342.286	294.543	192.144	302.162	301.839	248.199	322.037	272.064	227.133	254.627	269.329	244.662
ENSMUSG00000002957	Ap2a2	852.074	590.68	1490.83	867.193	708.774	1290.07	759.539	963.308	1218.52	761.232	588.824	844.662	943.395	798.586	1271.47	594.956	503.136	1277.05	488.272	565.238	1182.29	777.57	662.929	1117.59	753.514	580.03	1026
ENSMUSG00000002963	Pnkp	155.585	162.277	177.493	130.433	139.205	126.215	150.899	162.201	120.504	159.386	134.802	135.93	159.809	152.883	145.271	156.743	118.868	105.73	133.427	115.356	140.494	224.013	153.548	141.248	103.976	126.304	76.8094
ENSMUSG00000002968	Med25	594.596	499.935	599.372	716.355	548.681	871.14	1142.65	649.314	805.686	868.899	594.333	601.496	812.337	692.86	747.954	884.971	514.884	581.845	826.037	550.671	624.337	1069.07	668.606	697.064	668.447	596.217	512.904
ENSMUSG00000002980	Bcam	1599.99	1671.9	2175.65	731.619	1667.81	2523.61	796.654	2879.37	2774.11	1066.59	1496.76	4060.5	775.344	1637.02	2652.29	525.717	900.558	2645.81	421.743	1345	4274.07	831.472	1521.88	3220	920.304	1010.97	1885.06
ENSMUSG00000002981	Clptm1	954.853	1060.34	994.872	1078.18	1024.85	1038.24	1398.84	1329.18	1280.32	1315.31	1214.94	1167.44	1080.79	1225.1	1156.48	1286.28	1183.42	917.121	1097.25	1457.03	952.557	1709.24	1095.26	934.463	1078.75	1330.6	965.572
ENSMUSG00000002983	Relb	565.08	720.913	592.857	774.716	849.86	364.953	777.498	638.251	379.932	443.757	603.515	309.387	436.019	708.658	502.799	932.681	986.689	709.273	906.052	1088.46	457.213	351.76	602.378	351.902	888.615	818.774	487.629
ENSMUSG00000002984	Tomm40	240.261	300.23	220.401	216.915	260.931	192.035	311.645	232.149	191.94	389.901	237.927	222.206	347.192	328.192	234.286	258.946	411.098	277.499	251.184	348.931	196.383	358.364	284.376	154.022	283.016	476.829	355.735
ENSMUSG00000002985	Apoe	4766.49	1749.81	12374.2	3423.04	2493.86	9338.66	1614.32	4536.74	14419.7	576.515	719.2	13411.5	4466.78	1468.12	9608.65	627.702	1188.31	8453.55	244.94	2131.41	10622.6	921.674	1839.71	10775.8	1275.55	490.994	10214.9
ENSMUSG00000002992	Apoc2	17.1791	9.93761	19.45	13.4068	16.6604	9.93761	9.93761	16.4093	9.93761	9.93761	15.2244	13.7596	13.7495	14.0727	17.1389	9.93761	9.93761	17.377	13.7122	13.8809	9.93761	9.93761	9.93761	13.2947	9.93761	9.93761	9.93761
ENSMUSG00000002996	Hbp1	2234.93	2278.11	1753.22	2183.29	1763.44	1780.13	1757.97	1680.58	1885.54	3461.87	2547.81	1888.33	2140.78	2024.63	1690.06	3398.37	1658.09	2007.22	3719.81	2124.69	2179.76	2042.52	1862.41	1871.25	2833.18	1035.24	1831.23
ENSMUSG00000002997	Prkar2b	230.068	120.443	177.493	1298.13	236.477	341.751	1735.23	423.771	479.102	361.113	128.339	226.461	312.287	108.88	182.728	1133.8	142.493	200.126	1046.33	113.099	208.345	1358.36	182.025	272.134	294.704	69.0151	109.046
ENSMUSG00000003031	Cdkn1b	676.016	664.338	889.721	561.014	613.806	929.505	690.095	807.592	879.159	686.049	569.542	602.558	584.026	587.126	709.62	615.539	464.952	756.259	552.715	630.228	835.199	791.87	734.831	952.267	633.418	600.264	657.947
ENSMUSG00000003032	Klf4	3551.59	3979.3	3934.19	3139.36	5325.99	5042.59	4186.88	8327.91	5493.41	7059.81	14685.6	10773.3	4788.04	9323.35	7122.44	3015.8	1604.26	5277.38	2647.52	4437.93	6115.78	3521.88	4626.32	3252.21	2791.49	2447.24	4541.24
ENSMUSG00000003033	Ap1m1	275.927	190.114	425.313	200.719	170.532	380.152	192.94	212.542	353.093	292.375	181.806	267.933	296.418	208.947	341.33	274.869	200.434	255.97	239.736	162.654	255.171	244.949	167.791	292.504	326.422	227.794	252.364
ENSMUSG00000003037	Rab8a	314.636	361.118	355.485	352.643	407.556	343.351	462.58	478.249	434.77	412.188	511.692	351.892	369.402	470.442	302.967	341.35	458.099	248.793	325.044	459.9	316.901	489.325	422.589	312.023	304.721	486.947	234.758
ENSMUSG00000003038	Hmgn2	60.991	78.3806	82.8838	181.816	143.294	185.622	230.132	162.201	243.356	177.081	211.255	111.352	174.656	165.081	126.003	123.838	95.1729	126.586	111.462	122.125	147.489	137.947	143.096	176.994	93.8678	103.884	112.368
ENSMUSG00000003039	Fam32a	502.991	474.31	472.788	574.484	448.269	529.716	582.332	629.741	648.237	766.801	686.148	566.451	556.541	525.14	429.138	637.058	488.45	382.699	555.833	587.649	527.847	728.066	538.984	483.375	555.016	551.702	418.391
ENSMUSG00000003051	Elf3	482.633	1289.81	214.807	1053.94	2410.44	368.953	1570.03	2436.1	544.427	883.749	1453.61	416.696	1118.84	1714.79	463.447	1514.52	1514.22	412.975	1479.63	1442.46	424.38	1977.62	1881.33	408.739	1467.34	1720.01	200.634
ENSMUSG00000003062	Stard3nl	209.677	229.691	220.401	193.519	178.016	222.483	171.328	221.068	238.683	218.018	249.88	189.218	228.685	221.124	165.526	244.894	224.954	177.77	263.671	227.799	184.417	188.734	193.408	177.844	284.686	189.271	179.705
ENSMUSG00000003068	Stk11	777.785	1038.99	850.638	963.259	1561.33	1110.19	1307.85	1616.76	1143.88	864.258	1055.21	954.025	825.021	1166.78	994.086	756.808	958.305	1047.72	733.549	1258.74	1131.57	1196.67	1549.31	982.788	566.693	806.635	911.74
ENSMUSG00000003070	Efna2	23.8796	25.6267	28.5065	33.0454	30.9236	49.8717	32.3881	28.2963	45.7	27.4083	33.4452	61.8051	29.1712	40.5238	55.4113	21.9168	29.2178	56.3415	21.5204	20.707	57.9487	34.6209	42.1239	76.2248	22.0715	28.5536	58.841
ENSMUSG00000003072	Atp5d	748.273	772.15	613.332	697.499	687.068	587.293	1123.49	900.342	839.508	1073.08	979.011	655.654	841.931	899.448	639.003	797.035	509.01	541.225	601.563	757.957	573.607	1055.87	639.277	602.097	753.514	542.596	451.363
ENSMUSG00000003099	Ppp5c	433.77	366.458	426.244	522.4	391.948	462.538	693.687	474.844	566.59	598.794	408.836	397.575	524.827	391.422	457.393	481.738	324.913	374.731	436.297	422.914	427.365	662.059	379.998	368.869	344.782	421.173	392.011
ENSMUSG00000003119	Cdk12	1378.16	1336.77	1153.99	1560.27	1880.77	1383.61	1250.39	1250.9	1028.43	1412.76	1542.66	1468.96	1521.49	1505.79	1295.68	1575.32	2096.54	2011.2	1494.18	1947.69	1529.37	1071.27	1569.17	1202.37	1912.62	2168.08	2050.93
ENSMUSG00000003123	Lipe	536.581	463.633	605.886	991.988	851.895	249.712	1003.77	611.019	329.751	407.545	209.415	122.046	557.598	452.208	336.283	827.907	799.742	410.585	955.931	534.983	336.809	840.272	522.898	400.256	314.737	410.041	183.011
ENSMUSG00000003131	Pafah1b2	827.65	819.116	806.901	882.456	973.983	1043.03	947.506	821.207	893.154	1176.1	874.355	945.531	911.688	768.206	846.813	848.488	1103.16	953.752	913.326	1120.94	968.47	1265.97	945.794	950.571	955.329	1357.91	1436.86
ENSMUSG00000003134	Tbc1d8	934.501	687.823	543.529	756.759	689.103	304.143	845.741	730.157	369.43	695.331	597.087	428.381	603.053	572.542	448.311	1211.44	476.701	346.045	858.251	512.571	333.823	638.956	674.282	323.903	553.348	361.461	302.96
ENSMUSG00000003135	Cnot11	185.194	237.175	251.16	270.867	272.477	376.152	261.307	287.533	314.578	260.781	322.486	509.103	202.209	261.288	352.434	255.199	328.831	359.592	228.286	304.082	374.627	297.815	257.856	333.236	262.978	404.981	430.481
ENSMUSG00000003153	Slc2a3	1961.21	967.48	695.229	65.0373	53.2877	187.225	24.1686	58.1649	92.2676	4906.8	357.397	220.079	2236.95	121.122	320.13	544.431	46.1148	278.296	568.305	33.7523	248.199	244.949	44.1218	238.173	7432.61	192.314	268.865
ENSMUSG00000003154	Foxj2	477.543	558.654	582.619	519.706	1026.89	947.893	584.727	909.702	889.655	647.991	595.251	719.366	510.027	703.797	679.356	448.05	580.476	665.471	398.871	862.152	745.685	406.792	789.702	657.213	575.034	461.651	593.12
ENSMUSG00000003161	Sri	776.767	444.414	623.569	679.542	491.014	538.513	649.386	621.231	651.736	1089.79	556.687	372.078	706.641	423.032	454.365	1087.97	411.098	375.528	895.66	384.804	388.559	934.875	531.414	472.35	1090.42	455.579	260.065
ENSMUSG00000003166	Dgcr2	868.356	920.517	804.109	859.113	770.5	1011.05	1323.42	1122.42	1145.05	1090.72	983.601	846.785	950.793	1084.15	861.944	1041.19	657.81	653.525	896.7	753.476	829.231	1286.87	932.55	898.006	771.862	637.696	549.167
ENSMUSG00000003184	Irf3	217.834	215.789	250.228	246.594	231.722	248.11	339.204	261.124	232.843	192.903	186.409	177.505	231.862	205.294	234.286	227.09	216.129	200.925	225.163	186.255	223.293	304.421	274.905	293.353	206.174	237.926	121.22
ENSMUSG00000003190	Bcl2l12	96.1784	79.465	92.3098	78.7676	72.0819	91.5433	125.629	93.6914	119.33	111.794	83.8707	60.7147	110.925	84.3156	94.4751	76.5779	81.2946	84.7979	85.2137	75.7009	80.3007	101.393	105.01	107.116	102.293	60.7285	43.9942
ENSMUSG00000003198	Zfp959	77.6178	127.962	81.9396	87.8745	121.468	72.0658	66.268	105.723	73.334	157.523	225.053	122.046	82.0787	137.012	86.3073	163.316	175.899	114.561	156.395	221.065	112.475	83.587	114.548	82.2538	122.464	201.44	196.229
ENSMUSG00000003199	Mpnd	204.577	231.83	264.206	224.111	167.129	236.099	352.382	272.2	325.083	283.084	261.831	273.249	244.565	233.297	246.41	248.641	130.687	185.756	204.338	172.771	244.214	301.118	179.179	246.665	222.887	142.575	159.864
ENSMUSG00000003200	Sh3gl1	317.692	275.654	490.474	345.456	267.044	511.323	464.975	336.93	564.257	319.316	334.43	388.014	440.249	350.081	526.006	304.836	292.583	440.061	234.532	355.658	457.213	422.2	310.891	397.711	401.523	409.029	378.821
ENSMUSG00000003206	Ebi3	34.2929	13.7713	43.6658	21.5836	16.6604	13.1841	14.0368	16.4093	17.8368	9.93761	18.0868	9.93761	24.2585	24.3197	19.974	15.2849	18.432	34.5325	9.93761	9.93761	21.1789	13.8391	15.3213	25.2962	17.5991	13.6537	15.836
ENSMUSG00000003208	Ccdc94	93.0918	101.075	78.1596	93.3264	91.3603	83.4445	85.76	90.248	86.364	110.858	88.5223	68.3275	118.378	111.33	72.9867	133.248	130.687	90.4442	131.338	126.635	72.2074	80.238	83.0058	96.846	125.821	128.339	84.6175
ENSMUSG00000003226	Ranbp2	3839.54	4551.35	3421.52	4839.62	6450.43	4626.89	2981.41	4542.7	3441.11	4483.62	5625.65	4592.39	3541.03	4773.05	3582.23	4366.47	7611.31	5169.09	3821.63	7548.73	4551.52	3552.68	4902.52	3208.13	6175.19	7823.96	7369.85
ENSMUSG00000003227	Edar	29.7873	25.6267	65.8272	17.9706	26.2919	73.6949	17.9712	31.1705	98.1622	21.852	28.3213	110.282	27.9689	37.9269	77.0932	26.4273	25.84	88.8319	28.9298	27.484	135.496	9.93761	23.1823	150.617	28.025	22.5819	41.6722
ENSMUSG00000003228	Grk5	159.672	140.839	385.28	186.318	189.579	385.752	101.501	238.968	344.924	76.1149	148.639	204.119	117.314	127.237	288.83	107.818	173.935	327.716	70.424	123.253	296.992	66.7916	126.928	252.608	177.747	196.37	337.046
ENSMUSG00000003233	Dvl3	413.408	456.159	460.687	358.932	494.406	581.695	466.173	425.474	505.933	490.179	427.205	479.364	461.395	594.419	592.595	373.177	613.76	582.642	282.398	764.68	604.443	475.02	522.898	558.002	486.617	794.496	642.565
ENSMUSG00000003234	Abcf3	255.549	276.723	221.333	193.519	327.471	222.483	267.301	314.789	257.371	270.075	265.508	193.476	266.791	266.155	214.074	205.531	345.483	267.134	227.245	298.474	200.371	359.465	330.773	243.268	227.899	313.883	219.35
ENSMUSG00000003235	Eif2b5	372.682	426.261	330.342	278.957	368.195	317.747	330.817	399.084	349.592	499.463	445.573	377.39	416.987	480.166	354.453	391.896	460.057	320.543	363.52	551.792	345.766	560.843	353.494	307.78	394.848	610.381	315.055
ENSMUSG00000003269	Cyth2	596.632	676.08	487.682	604.116	777.961	512.923	693.687	634.847	468.603	755.663	767.859	535.653	609.395	686.783	688.435	901.81	696.965	681.399	782.391	889.04	599.47	492.626	632.654	475.743	775.198	757.068	588.725
ENSMUSG00000003271	Sult2b1	66.206	40.9424	33.6919	148.479	51.8811	35.4782	230.132	68.6334	62.6087	106.179	37.4313	35.1106	83.151	43.0995	34.1277	144.53	43.025	25.5674	124.02	34.9748	30.5665	186.528	48.09	38.5034	68.4625	54.4733	28.4926
ENSMUSG00000003273	Car11	17.1791	23.0641	32.6698	15.1536	18.6488	35.4782	22.7089	21.1647	34.5042	9.93761	21.7629	37.4065	17.3553	22.842	44.9084	13.4898	17.0031	28.3332	9.93761	19.217	37.1023	13.8391	22.0094	36.6805	9.93761	13.6537	30.9665
ENSMUSG00000003279	Dlgap1	102.345	64.2289	112.975	36.9521	71.3905	122.996	45.2243	44.0058	40.7747	39.6574	38.417	87.7572	101.329	41.814	83.2394	76.5779	109.006	94.4719	129.247	42.1782	132.496	38.1869	48.09	80.5327	115.746	63.8421	105.722
ENSMUSG00000003282	Plag1	37.5986	116.144	46.5995	34.0295	139.205	56.4993	29.7202	141.693	49.3584	25.2432	131.109	44.1813	33.8677	119.899	62.6781	27.5097	79.3068	46.4118	22.8209	120.997	52.8107	24.6715	161.145	50.1182	29.9153	81.3694	28.4926
ENSMUSG00000003283	Hck	78.6521	34.0508	109.223	49.2913	32.4281	22.7241	19.6336	52.0083	40.7747	13.4737	24.0262	23.016	39.572	45.658	63.7123	13.4898	23.5026	56.3415	17.2759	19.217	32.7729	29.7549	39.1052	45.6886	17.5991	17.1517	27.2339
ENSMUSG00000003299	Mrpl4	246.377	242.521	240.909	278.059	273.156	269.726	402.695	348	350.759	284.942	276.538	264.744	280.547	273.455	261.562	318.881	239.661	247.996	212.669	279.408	274.092	366.069	306.156	272.134	164.361	231.847	194.026
ENSMUSG00000003308	Keap1	200.498	266.036	278.181	225.01	260.931	316.947	335.609	305.42	307.574	311.884	259.993	245.605	292.186	300.218	300.947	277.679	326.872	224.864	259.509	387.046	287.036	382.579	274.905	295.899	321.414	433.317	238.06
ENSMUSG00000003309	Ap1m2	393.046	483.92	144.802	376.899	371.589	216.876	578.739	526.764	294.734	752.879	629.223	264.744	575.569	589.557	240.348	551.916	353.318	144.199	570.384	484.555	217.315	785.27	529.522	222.886	474.938	371.583	131.168
ENSMUSG00000003316	Glg1	3534.29	2801.06	3114.47	5046.09	3445.37	5939.54	5689.21	4120.7	5868.88	4266.47	3309.7	5152.94	3373	2986.95	3933.23	5049.29	2917.65	3796.38	4761.95	3706.43	5024.88	5838.25	3041.95	4160.13	4023.9	2965.09	3385.62
ENSMUSG00000003341	Atp8b3	9.93761	18.9262	20.6831	17.9706	19.5784	16.1637	16.1572	14.9877	9.93761	20.6643	18.0868	25.5675	21.6556	28.5687	27.3604	18.1865	21.0573	25.5674	17.2759	24.8652	21.1789	9.93761	22.0094	22.2107	26.097	29.6983	28.4926
ENSMUSG00000003344	Btbd2	295.283	232.899	263.274	278.957	199.779	355.352	508.088	351.406	442.937	404.759	272.862	261.554	310.171	267.372	329.216	309.518	134.623	220.875	331.284	185.132	319.888	578.446	289.111	340.873	226.228	98.7774	109.046
ENSMUSG00000003345	Csnk1g2	674.998	648.326	703.605	761.248	654.507	785.59	880.461	733.561	836.009	837.342	741.235	807.498	616.795	719.596	744.928	653.898	506.073	612.111	583.895	715.382	686.007	827.072	660.091	676.715	506.637	468.734	444.769
ENSMUSG00000003346	Abhd17a	212.736	276.723	290.292	186.318	218.811	210.467	294.868	338.633	325.083	269.145	338.105	251.985	286.896	412.09	291.859	225.216	195.529	160.991	197.047	305.203	194.389	340.752	312.784	239.872	159.339	154.767	121.22
ENSMUSG00000003348	Mob3a	288.152	292.751	301.47	431.692	405.52	288.937	329.619	364.177	285.394	236.614	214.015	234.97	268.908	346.433	321.14	550.045	583.413	271.12	365.599	506.968	254.175	252.66	346.867	220.337	823.567	802.589	352.437
ENSMUSG00000003352	Cacnb3	336.024	187.973	267.001	453.248	176.656	420.948	673.333	244.934	461.603	494.821	201.134	378.452	463.509	262.505	371.612	463.022	104.07	246.401	388.474	178.39	369.651	673.061	186.768	312.872	436.564	131.391	153.247
ENSMUSG00000003354	Ccdc65	32.0571	31.7013	25.2718	22.7079	27.8596	36.344	26.9899	24.323	35.7717	23.0069	30.3951	33.953	22.9741	24.3197	28.5152	42.8238	33.5707	30.1339	47.9472	26.1856	31.6739	28.5101	26.562	39.4102	26.097	28.5536	20.5657
ENSMUSG00000003355	Fkbp11	108.505	138.694	99.8339	48.3548	58.8895	52.3642	50.2302	70.3706	80.4496	149.136	143.106	89.9075	205.387	201.64	94.4751	65.1268	110.979	66.1564	62.9852	110.841	78.2801	56.6273	79.1645	61.5034	145.941	99.799	91.2938
ENSMUSG00000003360	Ddx23	644.466	727.318	781.775	857.317	925.148	926.307	881.659	982.879	989.949	764.017	920.257	759.716	754.205	815.599	811.506	728.742	918.176	773.779	683.666	1157.91	812.323	929.375	890.926	781.852	748.51	1292.16	829.343
ENSMUSG00000003363	Pld3	840.88	467.904	894.374	645.421	406.877	760.804	693.687	651.016	1078.58	811.353	429.042	873.33	755.262	533.648	863.961	630.509	272.006	673.435	485.153	385.925	763.588	934.875	446.249	762.351	845.25	282.494	570.045
ENSMUSG00000003378	Grik5	155.585	177.269	146.672	216.015	179.377	222.483	293.67	239.82	148.645	137.946	125.569	124.183	175.716	169.958	170.587	206.469	141.51	153.796	250.143	197.487	164.463	244.949	201.942	172.741	135.885	96.7334	85.7312
ENSMUSG00000003379	Cd79a	82.7847	28.1004	117.662	20.4268	27.8596	17.3959	9.93761	20.056	17.8368	20.6643	21.7629	31.6146	25.5158	28.5687	29.6571	21.9168	30.3192	38.8302	20.1755	28.7641	23.6561	15.8406	20.8034	28.2472	42.5703	38.5534	40.5054
ENSMUSG00000003380	Rabac1	401.191	530.896	551.905	426.303	511.368	594.49	573.95	825.462	996.946	370.4	477.715	510.165	319.691	588.342	489.682	442.435	502.157	369.95	425.901	653.758	458.208	585.048	604.27	515.602	323.084	380.692	341.443
ENSMUSG00000003382	Etv3	809.333	792.431	949.276	1233.49	1296.83	823.169	1018.14	932.676	752.038	544.024	670.54	706.624	547.027	827.751	763.086	739.969	1066.95	1327.21	556.872	1252.02	942.612	790.77	1002.55	709.783	845.25	1424.66	1026
ENSMUSG00000003402	Prkcsh	809.333	796.7	659.865	626.565	581.923	635.27	784.681	687.608	775.364	1205.8	793.565	746.974	1003.64	923.751	698.523	869.068	577.539	557.951	750.176	783.726	644.231	1172.47	666.714	606.337	972.007	737.847	659.046
ENSMUSG00000003410	Elavl3	20.0331	36.3702	15.2679	23.8062	24.6922	16.1637	9.93761	17.6985	13.9743	21.852	25.1237	26.8079	24.2585	31.3005	26.1906	20.7215	29.2178	31.0242	24.0875	33.7523	23.6561	13.8391	24.329	27.2748	29.9153	55.5189	46.3031
ENSMUSG00000003411	Rab3b	37.5986	20.3612	23.0307	17.9706	16.6604	28.3876	29.7202	17.6985	22.4783	74.2259	22.9076	18.8954	46.2741	19.73	15.5357	36.8369	17.0031	20.6714	30.1018	23.5173	17.0748	37.0044	23.1823	20.0315	63.343	18.616	15.836
ENSMUSG00000003418	St8sia6	103.372	42.0745	206.414	43.6459	32.4281	216.075	16.1572	33.9853	167.377	15.2595	44.2641	291.319	39.572	58.2766	276.712	18.1865	29.2178	149.798	13.7122	17.6362	172.446	17.5467	35.0277	283.168	47.8283	52.3779	332.648
ENSMUSG00000003420	Fcgrt	505.027	130.109	1057.22	539.462	209.975	472.936	484.137	340.336	645.904	92.1166	100.589	359.329	444.478	134.569	528.024	168.948	89.2319	445.638	114.604	109.711	506.956	302.219	150.698	601.249	166.034	48.1675	260.065
ENSMUSG00000003421	Nosip	221.913	208.302	223.198	194.419	152.151	254.516	226.534	260.272	285.394	253.346	227.812	184.959	265.733	194.331	192.843	177.394	116.896	164.188	189.754	173.895	173.444	311.027	193.408	218.638	172.728	116.121	97.9583
ENSMUSG00000003423	Pih1d1	169.884	209.372	198.02	191.719	160.322	189.63	258.909	240.673	270.216	214.298	215.855	198.798	197.972	193.113	192.843	157.682	127.733	154.596	175.165	170.523	208.345	208.582	155.448	172.741	154.316	146.64	103.505
ENSMUSG00000003429	Rps11	1855.39	2236.48	1863.94	1816.12	1604.74	1452.36	1646.64	2230.21	2116.43	2679.54	3136.21	2098.54	2297.19	2379.42	1719.31	1788.59	1935.06	1258.73	1674.98	2812.5	1669.59	2192.1	1885.11	1325.29	1734.17	1961.75	1986.12
ENSMUSG00000003435	Supt5	1282.51	1719.93	1099.09	1632.99	2268.02	1314.06	2011.76	2007.29	1335.13	1615.08	1684.02	1305.46	1563.77	1842.37	1290.64	1654.82	1545.54	1320.05	1508.73	1821.1	1252.9	1867.63	1968.35	1176.93	1368.94	1816.1	1187.49
ENSMUSG00000003436	Dll3	17.1791	21.735	15.2679	16.6298	20.4782	9.93761	16.1572	16.4093	13.9743	13.4737	18.0868	20.3245	22.9741	29.9424	22.5575	18.1865	23.5026	20.6714	13.7122	23.5173	15.4877	9.93761	20.8034	14.9767	17.5991	26.2234	29.736
ENSMUSG00000003437	Paf1	424.607	470.039	484.889	463.127	519.509	626.475	510.483	508.039	536.262	467.897	466.695	601.496	456.108	387.775	631.941	341.35	493.346	725.997	375.997	483.434	635.279	492.626	579.67	687.737	349.789	514.266	617.293
ENSMUSG00000003438	Timm50	164.778	161.205	189.624	134.044	137.842	147.914	180.935	209.131	227.001	305.382	214.015	148.733	224.45	222.341	161.477	186.776	200.434	130.591	162.653	243.51	134.496	254.863	155.448	136.136	176.074	239.953	201.735
ENSMUSG00000003444	Med29	69.3257	92.4464	88.5425	93.3264	118.054	92.3522	164.12	147.677	141.616	138.879	148.639	100.641	137.516	134.569	98.5527	74.6743	139.542	92.0558	87.3197	158.156	98.4272	124.672	129.783	111.39	100.609	186.229	115.689
ENSMUSG00000003452	Bicd1	168.863	59.8474	117.662	120.496	49.7656	304.143	123.219	55.532	146.302	123.01	47.1547	191.347	117.314	43.0995	141.217	229.902	44.0575	156.994	239.736	48.0661	178.432	339.651	63.7281	227.982	105.659	35.2816	171.991
ENSMUSG00000003458	Ncstn	1141.07	980.289	928.804	974.032	992.296	923.109	1139.06	1261.96	1085.58	1216.01	1204.84	1065.51	1011.04	1232.4	1135.3	1112.29	902.515	848.636	1014.12	1239.69	961.508	1309.97	1024.31	879.354	1163.8	880.479	761.226
ENSMUSG00000003464	Pex19	348.244	273.517	335.929	406.542	313.894	479.334	566.765	410.151	490.768	466.969	371.176	390.138	393.724	318.463	276.712	420.91	201.415	289.457	400.95	310.81	362.685	665.36	308.05	383.291	206.174	165.936	207.24
ENSMUSG00000003469	Phyhip	60.991	38.6659	68.6808	13.4068	21.3542	106.887	16.1572	22.2414	95.8053	76.1149	39.399	215.823	37.3069	31.3005	151.35	16.8046	21.0573	94.4719	17.2759	23.5173	153.481	15.8406	24.329	164.235	9.93761	21.3093	48.6009
ENSMUSG00000003476	Crhr2	22.6347	13.7713	23.0307	15.1536	16.6604	17.3959	16.1572	14.9877	13.9743	13.4737	9.93761	20.3245	17.3553	9.93761	27.3604	9.93761	17.0031	18.5256	13.7122	13.8809	15.4877	13.8391	13.5127	18.8843	9.93761	13.6537	19.0982
ENSMUSG00000003477	Inmt	41.9405	17.4019	152.279	102.397	17.6806	39.7761	188.138	40.4025	76.8946	55.2071	15.2244	28.0302	116.249	14.0727	60.6071	28.5794	15.4339	26.4995	18.7699	15.9075	29.4496	60.0257	15.3213	30.1649	28.025	9.93761	25.957
ENSMUSG00000003484	Cyp4f18	60.991	25.6267	75.3206	34.0295	36.1312	17.3959	14.0368	35.8371	17.8368	15.2595	13.4515	15.7139	44.0529	18.0487	25.0028	19.4833	24.682	44.7398	18.7699	17.6362	34.9495	21.9819	24.329	28.2472	26.097	13.6537	21.9714
ENSMUSG00000003500	Impdh1	210.696	373.934	374.107	375.102	530.364	275.33	464.975	549.743	250.363	160.318	329.836	222.206	176.777	468.01	356.471	168.01	368.989	353.217	161.61	445.33	280.066	274.689	446.249	289.958	125.821	303.758	254.564
ENSMUSG00000003505	Psg18	13.6667	9.93761	9.93761	9.93761	9.93761	9.93761	9.93761	9.93761	9.93761	13.4737	9.93761	18.8954	9.93761	9.93761	9.93761	9.93761	13.5837	9.93761	9.93761	9.93761	9.93761	9.93761	9.93761	13.2947	9.93761	9.93761	19.0982
ENSMUSG00000003518	Dusp3	638.36	464.701	933.457	726.231	682.998	549.709	437.429	553.998	605.081	696.259	374.85	294.508	566.055	561.603	593.604	792.358	890.77	761.834	543.36	931.613	499.993	586.148	514.382	546.978	977.011	1120.21	749.14
ENSMUSG00000003526	Prodh	76.5831	141.912	97.954	92.4183	164.407	107.693	131.65	164.762	96.9839	54.2475	116.327	92.0564	61.5999	121.122	102.627	63.2101	115.91	86.4121	77.8306	130.016	96.4174	103.613	175.383	107.971	42.5703	78.2874	53.1695
ENSMUSG00000003527	Dgcr14	148.432	126.888	158.819	158.396	126.929	164.77	176.132	149.386	158.013	164.044	136.647	139.132	155.565	134.569	174.634	197.093	142.493	137.797	188.712	160.405	173.444	154.522	142.146	183.796	150.966	119.177	125.643
ENSMUSG00000003528	Slc25a1	197.437	192.254	244.637	251.988	181.418	289.737	353.58	245.786	347.258	263.569	188.25	237.097	268.908	197.986	234.286	262.693	116.896	183.36	240.777	177.266	287.036	445.309	208.579	280.622	184.438	105.925	116.795
ENSMUSG00000003531	Dgcr6	104.399	96.763	93.251	64.1178	83.1148	93.9694	107.541	86.8014	142.787	66.6505	100.589	98.4965	65.9324	102.751	103.645	70.8617	71.3384	64.5262	69.3635	63.1187	95.4121	86.9321	91.6307	94.275	58.2023	52.3779	43.9942
ENSMUSG00000003534	Ddr1	654.644	860.744	607.748	1038.67	841.042	1467.55	1565.24	1275.58	1525.21	1033.18	885.371	1285.29	915.915	1062.28	1029.39	1374.2	677.388	819.968	1206.36	978.666	1346.39	1331.96	947.686	1110.81	1295.56	847.098	682.12
ENSMUSG00000003541	Ier3	2647.02	3616.44	2368.25	1817.02	3258.87	2876.96	1553.27	3342.21	3371.14	3694.8	4968.41	3487.2	3387.8	5223.83	3475.32	4179.4	6518.15	3598.91	2863.64	10103.9	3633.65	2101.91	4546.87	2202.72	4314.08	7527.61	4547.83
ENSMUSG00000003545	Fosb	9061.36	19451.1	14731	19905.8	37299.8	32984.6	36005.2	46250.6	32002.9	20293.4	51248.6	31370.4	18761.8	45594.5	29000	7241.77	9907.25	15957.2	8837	20078.2	20542.1	19578	42374.8	17457.5	7415.93	13999.7	12816.2
ENSMUSG00000003546	Klc4	240.261	244.659	184.959	198.919	237.157	209.665	292.471	353.109	242.188	262.64	244.364	238.161	277.373	316.03	220.138	215.843	131.671	196.934	253.265	214.329	220.304	355.062	313.731	238.173	226.228	129.356	72.336
ENSMUSG00000003549	Ercc1	255.549	237.175	257.683	218.714	305.068	240.103	177.332	161.346	223.496	239.403	201.134	324.265	204.328	246.686	357.481	305.772	446.349	332.497	181.418	327.629	283.053	162.252	216.163	237.324	421.547	532.478	526.091
ENSMUSG00000003555	Cyp17a1	28.6366	26.8726	18.1584	15.1536	19.5784	13.1841	16.1572	17.6985	9.93761	21.852	19.3652	29.2373	24.2585	18.0487	17.1389	20.7215	24.682	20.6714	27.745	23.5173	17.0748	17.5467	23.1823	24.2861	42.5703	15.5452	15.836
ENSMUSG00000003559	As3mt	85.8802	119.368	110.161	101.491	97.5324	159.153	109.955	138.273	175.567	78.9455	117.251	99.5689	65.9324	110.106	84.2624	61.2905	88.2408	63.7104	59.7842	101.8	94.4067	106.943	125.977	115.662	46.0824	85.4733	49.7462
ENSMUSG00000003573	Homer3	203.557	228.622	258.615	146.676	205.897	222.483	146.089	165.616	216.486	172.426	193.772	271.122	190.555	215.036	250.451	175.518	219.071	259.16	163.696	222.187	238.238	163.356	174.435	213.541	184.438	204.482	229.256
ENSMUSG00000003575	Crtc1	136.162	153.705	187.758	192.619	203.178	243.306	268.499	227.888	204.799	141.677	145.872	174.31	139.641	161.422	237.317	163.316	174.917	238.425	159.524	214.329	209.342	186.528	193.408	238.173	92.1809	106.945	122.326
ENSMUSG00000003581	Rnf215	126.952	130.109	185.892	123.207	126.929	177.604	141.278	143.403	167.377	129.547	146.795	159.394	133.266	140.676	176.658	159.56	140.526	157.794	162.653	142.404	173.444	162.252	128.832	157.427	144.265	120.195	115.689
ENSMUSG00000003585	Sec14l2	96.1784	341.892	78.1596	132.239	464.553	112.529	179.734	463.779	121.678	151	546.586	165.787	110.925	440.051	136.148	127.603	327.851	112.956	145.959	554.033	160.47	193.146	424.482	108.826	117.426	597.229	121.22
ENSMUSG00000003604	Aven	137.185	135.475	87.6001	75.1158	99.5878	122.996	79.6868	105.723	118.156	120.208	109.851	127.388	113.055	97.8429	94.4751	75.6263	189.641	79.9499	88.3722	136.774	92.395	104.723	80.1253	80.5327	124.142	180.142	180.807
ENSMUSG00000003617	Cp	486.704	3186.34	1312.17	984.806	4966.55	4647.68	789.471	5009.79	4723.8	1111.14	6324.2	3052.98	856.728	4553.13	2030.98	223.341	4362.16	1534.24	230.368	4185.88	1600.97	281.297	4431.47	1867.86	992.021	3532.5	2038.85
ENSMUSG00000003623	Crot	337.042	205.093	324.754	242.997	157.599	436.145	246.92	212.542	369.43	326.747	182.726	356.141	276.315	141.897	281.761	340.414	156.255	289.457	369.758	159.28	341.785	407.893	149.748	377.353	274.668	192.314	409.598
ENSMUSG00000003644	Rps6ka1	476.525	530.896	493.267	570.892	461.839	560.904	601.49	605.061	630.741	721.32	455.675	638.663	648.506	556.741	653.126	464.894	454.182	592.199	512.179	540.586	666.114	893.074	586.293	693.673	356.465	448.496	395.309
ENSMUSG00000003660	Snrnp200	1857.43	1809.58	1847.2	1982.2	1890.94	2569.18	2465.46	2714.32	2795.1	2221.09	1908.92	2136.76	1929.42	1918.92	1898.85	1943.86	1469.2	1708.63	1738.36	2123.57	2488.04	2393.39	1937.14	2012.82	1749.18	2012.32	1472.01
ENSMUSG00000003662	Ciao1	179.071	191.184	207.347	173.712	171.893	229.692	238.526	255.159	291.231	218.948	231.49	208.375	182.077	191.895	182.728	183.024	134.623	168.183	159.524	186.255	243.218	307.724	211.423	244.966	139.237	188.257	194.026
ENSMUSG00000003665	Has1	257.587	149.417	778.053	918.368	198.419	600.087	517.668	95.412	623.743	280.296	76.4124	489.985	527.999	139.455	729.796	526.653	202.396	1343.14	238.695	107.452	1038.09	96.9485	69.5328	331.539	1257.2	102.863	1883.96
ENSMUSG00000003680	Taf6l	236.184	238.244	229.724	253.787	201.818	170.385	299.662	245.786	191.94	271.933	258.154	209.439	228.685	227.211	231.255	188.652	165.097	191.345	196.005	182.885	208.345	330.844	276.8	222.036	134.208	126.304	122.326
ENSMUSG00000003721	Insig2	350.281	276.723	346.173	348.151	214.054	436.945	321.231	313.085	439.437	628.498	278.377	357.204	392.666	238.166	322.149	725.936	277.886	357.201	646.253	272.678	451.244	795.171	290.058	503.729	598.388	296.671	421.688
ENSMUSG00000003731	Kpna6	631.236	475.378	550.974	643.625	577.174	787.19	826.586	612.721	852.336	939.437	548.423	555.832	729.895	486.244	584.524	657.64	624.528	624.854	584.934	728.827	701.921	1055.87	632.654	664.844	598.388	827.878	832.639
ENSMUSG00000003746	Man1a	4509.06	1082.75	3263.34	2435.55	790.171	5921.15	1939.94	891.833	5854.89	5044.15	577.805	3657.07	3035.89	493.537	2769.29	4230.84	589.287	3305.9	4678.83	445.33	4406.33	3821.05	357.28	3038.58	4397.46	752.01	5002.6
ENSMUSG00000003752	Itpkc	1700.73	1779.69	901.818	1394.19	2134.42	837.56	1239.62	1854.99	648.237	1153.83	1474.73	1413.75	1453.86	2311.38	1424.79	2560.27	2062.29	1230.07	1931.62	2291.6	1054	1256.07	2707.1	808.983	2806.5	2267.2	1323.71
ENSMUSG00000003762	Coq8b	198.457	239.314	184.026	268.171	205.897	194.44	315.24	209.984	168.547	200.346	239.766	245.605	238.214	285.621	248.43	285.171	291.604	232.841	333.364	231.166	213.328	270.284	268.275	205.895	334.768	358.424	324.951
ENSMUSG00000003778	Brd8	748.273	631.246	572.381	1071.89	633.479	648.864	1196.52	675.695	544.427	771.442	578.724	469.805	826.078	611.434	560.31	1046.81	495.304	573.084	1041.14	485.676	534.811	890.874	747.13	616.512	675.119	446.472	435.976
ENSMUSG00000003779	Kif20a	239.242	137.621	160.687	142.166	109.169	169.583	179.734	138.273	195.447	459.541	234.249	170.049	450.822	190.677	195.876	169.887	84.2735	152.197	187.671	99.5376	196.383	225.115	166.842	191.447	167.708	114.083	104.613
ENSMUSG00000003808	Farsa	254.53	358.982	273.523	280.755	441.484	244.907	315.24	306.272	277.221	332.32	319.729	316.826	354.595	345.217	313.063	284.235	528.591	354.811	249.103	480.072	300.974	318.734	306.156	243.268	354.796	694.348	542.574
ENSMUSG00000003809	Gcdh	107.479	120.443	117.662	101.491	110.537	135.863	103.917	143.403	165.036	126.746	130.186	141.266	153.442	117.452	129.048	112.534	55.2777	86.4121	105.175	96.1419	107.461	160.044	119.312	116.516	125.821	86.4984	80.1586
ENSMUSG00000003810	Mast2	1621.36	847.935	1080.48	1176.03	811.198	1134.97	1238.42	536.977	801.021	2035.48	632.896	1096.3	1719.12	764.56	1267.44	2506.96	1281.29	1269.09	2241.26	934.974	1097.76	1323.17	601.431	903.093	2246.16	1424.66	1568.68
ENSMUSG00000003812	Dnase2a	283.059	226.483	208.279	175.513	158.96	76.1361	200.14	213.394	132.238	289.588	163.386	107.07	282.664	157.763	147.297	221.467	130.687	148.198	248.062	155.906	124.493	333.046	235.117	142.1	246.276	77.2592	74.5739
ENSMUSG00000003813	Rad23a	573.222	527.693	467.203	489.172	500.513	520.92	596.701	550.594	623.743	767.73	662.277	535.653	708.755	621.156	531.051	662.318	441.453	506.974	648.331	486.796	488.055	723.666	494.511	582.594	484.949	500.101	346.94
ENSMUSG00000003814	Calr	3958.59	4878.99	3957.45	4444.63	5069.64	4092.08	4153.36	4814.1	4022.98	5006.1	4809.61	4354.58	4552.38	4742.68	4273.13	4376.76	6341.01	4661.89	3750.98	6503.58	4309.87	4105.93	3807.18	3255.6	5836.65	7815.86	6677.8
ENSMUSG00000003824	Syce2	40.8608	54.3441	39.7193	35.0084	52.5847	42.3238	31.0607	45.7951	56.6112	49.43	69.8658	40.8118	57.2511	60.7764	43.8466	38.8463	51.2216	43.9014	36.9435	58.5147	44.5062	60.0257	57.8967	41.2154	37.2349	43.9237	40.5054
ENSMUSG00000003847	Nfat5	5536.74	5191.69	4557.59	4899.77	6445	5339.17	3110.7	4166.64	3969.34	3534.25	4304.75	6280.42	4126.49	4803.43	5612.56	4717.23	8193.62	8326.16	4753.64	6967.35	6890.45	3509.78	5016.03	5505.47	6040.11	7032.01	11033.3
ENSMUSG00000003848	Nob1	146.388	171.916	186.825	111.453	212.694	194.44	120.809	186.101	200.123	198.485	216.774	238.161	165.113	218.689	210.031	92.7034	301.401	298.225	89.4244	298.474	245.211	122.458	192.459	214.391	202.831	477.84	517.3
ENSMUSG00000003849	Nqo1	64.1226	467.904	108.285	111.453	695.886	192.035	138.872	1054.35	251.531	93.9941	737.562	197.733	86.3656	588.342	152.363	43.8112	384.658	124.183	60.8522	583.167	185.414	61.1559	649.684	125.904	59.9185	321.982	127.853
ENSMUSG00000003863	Ppfia3	48.358	42.0745	33.6919	26.9885	55.3927	36.344	46.4804	33.0525	42.0121	43.5944	38.417	49.7393	55.0692	44.3807	53.3243	35.8259	38.8647	45.5765	52.2737	34.9748	48.674	69.0395	48.09	57.1422	39.0242	34.18	25.957
ENSMUSG00000003865	Gys1	246.377	230.76	255.82	171.01	197.059	290.537	288.876	279.015	278.389	397.33	245.283	292.382	378.919	278.322	312.053	224.279	108.019	212.098	226.204	135.648	286.04	454.113	298.581	386.684	206.174	108.985	111.261
ENSMUSG00000003868	Ruvbl2	260.644	295.956	318.235	228.608	195.699	380.152	329.619	322.453	473.269	419.616	324.323	317.889	404.298	344.001	310.034	262.693	224.954	236.83	225.163	309.688	309.933	407.893	259.75	348.508	267.988	332.106	267.765
ENSMUSG00000003872	Lin7b	18.65	26.8726	24.1619	21.5836	28.6336	31.0881	21.2029	23.2926	22.4783	18.1446	24.0262	33.953	21.6556	22.842	36.3196	18.1865	29.2178	37.9768	24.0875	22.1349	36.0285	20.5748	26.562	41.2154	9.93761	17.1517	20.5657
ENSMUSG00000003873	Bax	135.139	132.256	177.493	122.304	119.42	138.274	162.918	139.983	183.754	196.625	143.106	117.77	207.506	128.459	149.324	168.948	143.477	146.599	159.524	130.016	120.489	259.269	128.832	119.077	137.561	175.069	134.482
ENSMUSG00000003882	Il7r	184.174	39.8063	202.684	109.643	64.4599	31.0881	36.3085	58.1649	61.4119	35.6667	16.7239	29.2373	37.3069	27.1766	62.6781	67.0409	19.7744	104.124	191.838	22.1349	37.1023	23.3439	33.9963	30.1649	51.3035	15.5452	43.9942
ENSMUSG00000003923	Tfam	192.337	236.106	213.874	236.702	209.296	260.12	216.938	261.124	260.874	288.659	357.397	233.907	237.155	223.559	205.987	222.404	276.906	221.673	237.654	313.052	243.218	308.825	240.803	271.285	187.783	327.044	365.629
ENSMUSG00000003929	Zfp81	169.884	162.277	161.621	193.519	150.107	242.505	173.73	159.638	235.179	150.068	179.964	161.525	125.825	128.459	154.388	272.059	191.604	175.374	255.346	187.378	203.361	166.667	143.096	218.638	176.074	255.148	340.344
ENSMUSG00000003934	Efnb3	23.8796	20.3612	42.6833	22.7079	22.2108	75.3227	19.6336	21.1647	80.4496	16.7707	22.9076	80.2199	21.6556	31.3005	62.6781	20.7215	36.762	72.6598	17.2759	30.0289	79.2906	15.8406	19.5543	89.1282	22.0715	42.8563	47.4533
ENSMUSG00000003948	Mmd	98.2348	116.144	308.921	93.3264	209.975	596.888	77.2537	295.199	467.436	46.521	141.261	525.033	48.485	111.33	297.918	34.8101	80.3009	492.637	22.8209	109.711	755.631	32.2074	262.592	571.57	70.1652	61.7673	371.126
ENSMUSG00000003949	Hlf	43.017	305.572	99.8339	148.479	406.199	155.139	236.128	417.813	195.447	28.4708	434.552	149.799	53.9761	494.753	160.464	84.1772	170.008	171.379	52.2737	243.51	193.392	126.886	419.75	146.359	33.6139	122.232	122.326
ENSMUSG00000003955	Fam162a	190.296	152.633	221.333	133.142	99.5878	224.886	135.262	156.222	251.531	362.041	196.533	232.843	247.741	137.012	194.865	162.377	84.2735	173.776	165.782	98.4059	170.451	206.377	110.734	188.047	204.503	121.214	183.011
ENSMUSG00000003970	Rpl8	2940.06	3909.93	3135.87	2588.17	3146.29	2890.55	3314.2	4426.99	4454.43	3581.58	4717.82	3992.55	3076.05	4310.13	2929.66	2551.86	3335.54	2302.63	2273.47	5303.85	2913.66	3370.1	3297.34	2591.83	2436.27	3554.75	3043.98
ENSMUSG00000003974	Grm3	21.3559	9.93761	13.479	15.1536	9.93761	17.3959	9.93761	9.93761	9.93761	13.4737	9.93761	9.93761	9.93761	9.93761	9.93761	9.93761	13.5837	9.93761	9.93761	9.93761	9.93761	9.93761	9.93761	13.2947	14.9269	9.93761	9.93761
ENSMUSG00000003992	Ssbp2	216.815	197.604	340.585	306.818	201.138	668.054	303.257	235.559	647.07	98.6841	195.613	471.93	118.378	172.396	377.668	204.594	184.734	372.341	204.338	201.979	455.223	206.377	206.683	506.273	142.589	152.736	329.349
ENSMUSG00000004018	Fancl	144.343	153.705	126.092	124.111	128.294	143.095	124.424	157.076	172.057	191.042	173.518	114.562	175.716	139.455	129.048	174.579	141.51	86.4121	142.827	149.156	118.486	160.044	131.686	143.804	110.704	110.005	85.7312
ENSMUSG00000004031	Brinp2	21.3559	9.93761	18.1584	13.4068	9.93761	23.703	9.93761	13.3017	9.93761	13.4737	13.4515	15.7139	15.6976	9.93761	13.6478	13.4898	9.93761	21.6925	13.7122	9.93761	15.4877	9.93761	9.93761	9.93761	14.9269	13.6537	27.2339
ENSMUSG00000004032	Gstm5	68.2865	133.329	143.867	92.4183	124.882	272.128	114.781	176.714	381.099	89.2987	214.935	288.13	79.9329	150.442	187.786	85.1256	109.006	163.389	58.7151	146.906	240.23	88.0464	150.698	232.228	63.343	105.925	147.73
ENSMUSG00000004035	Gstm7	17.1791	9.93761	23.0307	9.93761	16.6604	19.6446	22.7089	16.4093	29.3356	23.0069	19.3652	24.3053	25.5158	18.0487	23.7935	16.8046	15.4339	14.7908	15.6382	13.8809	23.6561	20.5748	15.3213	29.2102	22.0715	21.3093	15.836
ENSMUSG00000004038	Gstm3	13.6667	15.7325	21.8734	23.8062	24.6922	25.6124	25.5931	18.9056	25.3005	20.6643	13.4515	9.93761	15.6976	14.0727	13.6478	13.4898	18.432	23.6643	13.7122	19.217	15.4877	15.8406	16.853	22.2107	17.5991	17.1517	20.5657
ENSMUSG00000004040	Stat3	3301.28	5807.49	4093.3	5546.12	7686.77	5543.03	5808.92	6019.69	4540.72	3526.83	6687.7	6220.97	2941.83	6301.57	5271.65	4698.52	7230.62	7315.74	3969.17	8662.22	6869.57	3739.66	6464.19	4592.47	4640.94	8892.01	7666.45
ENSMUSG00000004043	Stat5a	2391.62	1654.82	1146.55	911.186	1136.76	713.63	850.53	897.789	619.078	2486.51	1680.35	1565.58	2573.01	1915.27	1484.3	2641.65	999.413	1035.77	2092.68	791.569	900.84	3928.84	1280.67	1191.35	2269.5	850.132	886.472
ENSMUSG00000004044	Ptrf	2481.17	508.476	5744.83	2182.4	813.233	5257.63	1403.63	858.648	5303.34	1738.51	558.523	3869.4	1614.49	754.838	4630.18	1138.48	281.805	4173.79	842.663	359.021	4932.39	1011.87	349.707	4691.66	2257.83	839.005	4105.13
ENSMUSG00000004054	Map3k11	394.064	638.719	521.19	447.859	754.221	472.936	502.101	712.287	469.77	323.032	474.042	312.575	430.733	717.165	532.06	373.177	543.276	487.061	334.404	873.355	489.049	383.68	805.785	571.57	516.647	553.725	278.764
ENSMUSG00000004056	Akt2	425.625	395.293	562.143	774.716	615.841	755.208	752.355	591.445	636.573	777.94	508.019	587.691	714.04	585.911	728.787	694.127	520.759	736.35	593.249	547.309	655.172	854.573	552.231	602.097	713.483	581.042	734.857
ENSMUSG00000004069	Dnaja3	404.246	479.649	349.897	462.229	465.91	396.151	650.583	558.254	473.269	574.659	572.296	346.579	484.654	482.597	400.881	449.921	408.161	381.902	404.069	533.863	388.559	618.053	430.161	337.479	441.569	514.266	531.586
ENSMUSG00000004070	Hmox2	283.059	269.242	328.479	259.181	318.646	257.718	321.231	361.623	301.738	320.245	351.885	238.161	277.373	342.785	253.481	226.153	272.986	233.639	202.255	347.81	257.163	333.046	344.027	273.832	184.438	263.252	249.063
ENSMUSG00000004071	Cdip1	412.39	556.518	475.581	344.557	571.747	497.728	450.604	554.85	504.766	342.537	540.158	429.443	355.653	543.372	450.329	294.536	577.539	470.333	309.443	700.817	473.132	390.284	596.701	586.834	246.276	499.089	445.868
ENSMUSG00000004085	Zak	1448.38	1037.92	2301.26	2045.04	1656.28	5610.98	1364.12	1463.61	5182.07	1380.28	1325.1	4290.88	1067.05	1130.33	2845.94	1464.94	1647.32	3333.76	1341.44	1767.33	4293.96	773.169	1188.91	3297.14	1855.92	1850.49	4006.27
ENSMUSG00000004096	Cwc15	590.525	409.176	423.451	442.47	347.155	457.74	490.125	439.945	497.767	845.695	668.704	572.823	501.569	408.443	381.705	435.884	415.994	311.776	366.639	534.983	385.573	566.344	392.303	343.418	426.553	567.889	474.442
ENSMUSG00000004098	Col5a3	487.722	57.65	3123.78	879.762	406.199	2137.48	515.273	124.582	1430.76	117.404	54.79	722.552	556.541	219.906	3247.37	254.262	84.2735	2563	62.9852	39.7978	1334.45	90.2738	46.1101	1300.71	951.993	86.4984	2784.74
ENSMUSG00000004099	Dnmt1	1259.11	1987.81	901.818	1879.86	2531.16	1087.8	2303.85	1693.34	1083.24	1884.21	1737.26	926.419	1681.07	1937.14	1094.96	1965.37	1878.29	1291.38	1713.42	2256.87	1161.41	1905.03	1899.3	881.898	908.629	1213.27	921.628
ENSMUSG00000004100	Ppan	144.343	300.23	217.604	179.115	505.262	248.911	168.925	215.1	153.33	134.214	236.088	279.627	170.415	275.889	310.034	126.662	588.308	477.502	104.127	557.395	340.79	146.789	277.747	221.187	231.241	689.29	570.045
ENSMUSG00000004105	Angptl2	263.701	74.0377	1438.72	528.686	224.247	3359.01	450.604	189.514	2804.42	120.208	60.4667	1368.1	284.78	79.3827	1759.66	104.988	73.3334	1482.49	73.6016	50.4017	1796.89	95.8368	54.9682	1468.57	249.617	39.6347	859.006
ENSMUSG00000004110	Cacna1e	32.0571	9.93761	62.9678	28.021	23.051	22.7241	19.6336	13.3017	25.3005	9.93761	15.2244	15.7139	9.93761	16.2148	34.1277	15.2849	9.93761	20.6714	9.93761	9.93761	21.1789	13.8391	15.3213	18.8843	14.9269	13.6537	19.0982
ENSMUSG00000004113	Cacna1b	21.3559	15.7325	25.2718	13.4068	15.565	16.1637	14.0368	16.4093	13.9743	9.93761	13.4515	13.7596	13.7495	9.93761	13.6478	9.93761	9.93761	19.6189	13.7122	9.93761	13.6175	13.8391	9.93761	13.2947	9.93761	13.6537	23.332
ENSMUSG00000004127	Trmt10a	149.454	162.277	109.223	133.142	141.25	159.955	101.501	107.439	100.518	207.788	184.567	165.787	186.316	150.442	152.363	139.83	164.115	214.492	126.111	186.255	151.484	146.789	163.994	125.904	219.545	266.29	309.557
ENSMUSG00000004151	Etv1	109.531	68.5957	182.159	256.484	72.7731	444.143	244.522	101.429	497.767	271.004	101.516	389.076	175.716	115.004	316.092	174.579	51.2216	213.694	206.421	127.762	311.924	247.152	148.798	246.665	139.237	28.5536	200.634
ENSMUSG00000004187	Kifc2	70.3642	32.8803	62.0132	75.1158	65.1544	78.5746	79.6868	47.5775	52.9939	41.6316	36.4418	65.0702	61.5999	51.9968	72.9867	47.738	37.8155	70.224	69.3635	37.3982	82.3198	85.8175	72.4272	85.6929	51.3035	26.2234	27.2339
ENSMUSG00000004207	Psap	6431.12	7531.08	9332.59	7936.71	9468.37	8930.96	6958.12	12020.4	12383.7	4529.1	8921.94	8436.64	5328.05	10186	9124.52	5979.97	7540.85	8403.39	4589.47	11200.6	8772.93	5834.95	9473.06	7353.51	5172.92	7345.55	7957.55
ENSMUSG00000004221	Ikbkg	908.043	446.549	482.097	557.422	363.444	375.352	684.109	515.699	412.603	1283.76	354.641	329.578	1115.67	403.58	378.677	1392.91	392.492	357.998	1328.97	355.658	391.544	1401.26	509.651	410.435	1175.48	428.257	213.846
ENSMUSG00000004231	Pax2	9.93761	9.93761	13.479	22.7079	12.8948	13.1841	14.0368	9.93761	9.93761	9.93761	9.93761	9.93761	9.93761	9.93761	13.6478	13.4898	9.93761	9.93761	9.93761	9.93761	9.93761	13.8391	9.93761	13.2947	9.93761	9.93761	9.93761
ENSMUSG00000004233	Wars2	126.952	151.561	135.451	156.593	161.684	159.955	140.075	157.93	143.959	119.273	120.025	99.5689	135.391	132.126	109.75	247.704	184.734	102.516	276.156	151.407	112.475	116.92	132.637	114.808	211.188	186.229	134.482
ENSMUSG00000004263	Atn1	868.356	1093.43	1140.96	1752.39	1572.18	2010.37	2242.8	1635.48	1969.5	1226.22	1328.77	1250.25	1022.66	1394	1567.01	1077.68	1059.12	1502.39	784.469	1477.19	1517.44	1257.17	1404.58	1376.16	955.329	1288.12	1058.95
ENSMUSG00000004264	Phb2	609.863	812.711	588.203	672.358	785.423	641.667	1200.11	835.673	778.863	1125.06	967.994	702.377	1057.54	1003.95	820.585	898.068	903.494	705.291	731.47	918.169	629.311	1146.07	924.036	675.019	823.567	1153.59	808.468
ENSMUSG00000004266	Ptpn6	254.53	111.842	233.452	225.01	115.321	127.019	270.897	210.836	173.227	215.228	94.0959	76.9832	266.791	113.78	126.003	159.56	60.3203	106.534	151.178	69.9935	101.44	291.208	132.637	159.98	114.066	43.9237	50.8893
ENSMUSG00000004267	Eno2	55.7513	45.4506	93.251	88.7837	58.8895	65.5338	102.709	50.2399	68.5763	21.852	27.2688	53.0481	46.2741	31.3005	101.609	65.1268	69.3412	122.58	43.5849	45.7202	49.7107	60.0257	73.391	66.7152	61.632	49.2228	80.1586
ENSMUSG00000004268	Emg1	392.028	472.175	362.003	516.114	467.267	380.952	546.408	465.481	441.77	488.322	464.859	369.953	462.452	481.382	352.434	410.615	592.224	421.738	401.99	574.203	339.795	542.139	507.758	358.689	349.789	545.631	512.904
ENSMUSG00000004270	Lpcat3	398.137	415.583	403.9	825.893	426.556	449.742	1332.99	591.445	561.924	625.714	350.048	422.007	512.141	443.698	437.211	777.39	448.307	400.227	746.019	392.651	447.264	1119.67	455.712	423.158	488.285	349.314	348.04
ENSMUSG00000004285	Atp6v1f	256.568	357.914	244.637	388.577	345.119	197.645	486.532	448.457	341.422	306.311	456.593	227.525	278.431	350.081	226.202	345.094	331.77	179.367	269.914	466.624	215.321	394.686	331.72	172.741	192.8	301.733	284.264
ENSMUSG00000004296	Il12b	23.8796	18.9262	35.7191	23.8062	18.6488	9.93761	17.9712	18.9056	17.8368	9.93761	20.5854	17.377	9.93761	16.2148	9.93761	13.4898	9.93761	19.6189	13.7122	9.93761	27.1808	9.93761	13.5127	13.2947	9.93761	9.93761	25.957
ENSMUSG00000004317	Clcn5	227.01	175.128	418.796	464.025	240.554	376.952	286.479	277.311	272.551	213.368	227.812	158.328	255.15	295.353	392.807	275.806	293.563	458.384	210.586	305.203	298.983	242.745	231.327	284.017	491.622	322.995	661.244
ENSMUSG00000004319	Clcn3	1251.99	1718.86	679.408	1661.71	2118.14	536.914	1568.83	1601.45	477.936	1908.34	1892.4	530.343	1444.34	1731.8	608.737	2208.57	1978.12	480.688	2576.87	2102.28	508.946	2352.69	1983.49	468.11	1642.45	1650.22	467.848
ENSMUSG00000004328	Hif3a	27.4731	15.7325	30.6049	17.9706	15.565	17.3959	24.1686	16.4093	13.9743	9.93761	13.4515	15.7139	21.6556	16.2148	22.5575	16.8046	15.4339	17.377	17.2759	13.8809	18.5208	15.8406	15.3213	24.2861	14.9269	15.5452	9.93761
ENSMUSG00000004347	Pde1c	51.5365	43.2031	100.774	62.2769	43.3692	93.1609	57.6662	69.5022	79.2652	29.5224	26.2037	36.2615	27.9689	22.842	70.9302	32.762	18.432	43.0613	24.0875	28.7641	55.8972	28.5101	31.9151	80.5327	31.7763	27.3961	34.5965
ENSMUSG00000004356	Utp20	835.791	854.34	671.033	668.767	931.253	1071.82	648.188	769.3	838.341	1276.34	1036.85	1122.84	1036.4	934.688	775.191	908.358	1654.17	913.139	863.447	1322.59	1015.21	937.075	864.438	793.722	1325.58	2472.52	1768.61
ENSMUSG00000004359	Spic	39.7775	13.7713	40.7103	20.4268	18.6488	9.93761	9.93761	16.4093	13.9743	13.4737	16.7239	13.7596	18.8684	18.0487	22.5575	18.1865	13.5837	23.6643	13.7122	9.93761	15.4877	9.93761	15.3213	21.1371	24.119	9.93761	30.9665
ENSMUSG00000004360	9330159F19Rik	18.65	9.93761	25.2718	15.1536	12.8948	46.5319	16.1572	13.3017	22.4783	9.93761	13.4515	20.3245	20.2925	14.0727	25.0028	15.2849	9.93761	23.6643	13.7122	13.8809	27.1808	19.1059	9.93761	28.2472	22.0715	9.93761	28.4926
ENSMUSG00000004364	Cul3	1661.04	1666.56	1420.11	2510.06	2344.66	2201.44	1917.19	1893.28	1766.6	2747.29	2620.33	2233.37	1705.38	1781.61	1779.83	2624.81	2259.98	2147.36	2094.75	2563.81	2049.48	1955.62	1945.65	1586.41	2576.36	2865.97	3193.38
ENSMUSG00000004371	Il11	28.6366	47.687	24.1619	25.9433	30.1651	24.6649	28.3643	17.6985	29.3356	23.0069	54.79	44.1813	30.3606	44.3807	34.1277	31.7284	63.3342	100.104	25.3272	48.0661	53.8409	24.6715	33.9963	30.1649	65.0516	96.7334	341.443
ENSMUSG00000004383	Large1	724.866	378.206	578.896	673.256	429.27	584.094	679.319	424.623	507.099	692.546	349.129	515.475	776.401	402.364	576.452	1485.52	614.739	534.056	2103.07	297.353	588.528	1087.77	365.8	523.234	1308.9	349.314	504.113
ENSMUSG00000004393	Ddx56	204.577	309.845	198.953	188.118	351.906	226.488	233.729	272.2	235.179	300.736	281.134	193.476	249.858	277.105	230.244	177.394	450.266	310.979	207.462	411.706	255.171	268.081	330.773	272.134	237.924	461.651	349.139
ENSMUSG00000004394	Tmed4	304.451	348.301	332.204	345.456	332.222	411.349	407.486	515.699	501.267	391.759	469.45	418.82	350.365	432.757	339.311	402.192	305.32	283.079	342.723	397.134	377.612	648.858	433.946	345.963	222.887	268.316	194.026
ENSMUSG00000004415	Col26a1	15.5658	9.93761	29.5605	17.9706	12.8948	38.9222	17.9712	18.9056	35.7717	13.4737	9.93761	9.93761	18.8684	9.93761	31.9094	9.93761	9.93761	25.5674	9.93761	9.93761	18.5208	15.8406	9.93761	26.2917	9.93761	13.6537	17.5405
ENSMUSG00000004446	Bid	241.281	199.744	102.652	131.336	167.81	87.4963	141.278	180.981	106.403	370.4	220.454	112.422	331.327	197.986	151.35	317.944	521.738	154.596	249.103	403.86	130.496	283.499	194.356	108.826	801.884	1407.47	268.865
ENSMUSG00000004451	Ralb	495.866	832.992	564.005	607.708	758.291	387.352	553.593	677.397	445.27	565.376	727.463	329.578	505.798	801.017	453.356	877.488	1246.05	492.637	680.548	1284.51	393.534	631.255	753.752	363.779	870.268	1942.53	560.156
ENSMUSG00000004455	Ppp1cc	95.1498	134.402	109.223	339.166	503.905	553.707	341.6	474.844	531.596	466.969	529.139	538.84	388.437	489.89	453.356	310.454	567.75	565.916	262.63	511.45	569.628	396.887	464.229	492.704	413.204	637.696	739.252
ENSMUSG00000004460	Dnajb11	497.901	518.085	430.898	531.38	605.666	426.547	484.137	472.291	439.437	629.427	537.404	350.829	495.226	544.587	369.593	564.08	959.284	506.178	503.863	1029.08	395.524	472.819	369.586	289.11	595.052	813.716	522.794
ENSMUSG00000004462	Tbccd1	107.479	108.614	121.41	109.643	107.802	152.731	161.717	126.294	143.959	110.858	127.416	102.785	89.5769	105.204	98.5527	138.89	109.993	100.104	119.836	118.741	115.481	150.104	124.073	119.931	97.2396	100.82	75.692
ENSMUSG00000004473	Clec11a	27.4731	17.4019	103.592	129.53	33.1749	105.274	142.481	25.3362	104.049	31.5981	28.3213	54.1475	56.1608	25.7621	69.9011	31.7284	22.2966	53.8725	18.7699	17.6362	75.2459	32.2074	27.6548	50.1182	58.2023	18.616	128.958
ENSMUSG00000004500	Zfp324	87.9422	71.8629	88.5425	73.2876	65.8486	109.306	96.6636	77.3028	108.755	70.4423	49.0724	57.4369	97.0593	64.5157	85.285	66.0842	53.2524	71.0363	75.7171	34.9748	68.1481	141.263	82.046	122.491	90.4933	47.11	52.0303
ENSMUSG00000004508	Gab2	307.506	479.649	511.883	317.602	480.837	232.094	218.137	459.523	203.63	114.599	418.939	132.728	254.091	478.951	281.761	203.656	504.115	354.014	178.292	383.683	217.315	190.94	393.249	190.597	166.034	324.007	240.261
ENSMUSG00000004530	Coro1c	773.714	542.64	925.082	966.85	461.161	622.477	775.103	508.89	623.743	976.561	478.634	625.92	873.639	533.648	748.963	1127.25	594.181	540.428	938.265	524.898	528.842	774.269	411.232	557.154	1035.38	839.005	453.561
ENSMUSG00000004535	Tax1bp1	4127.5	3283.46	2862.32	4453.61	3509.8	3925.8	3356.1	3309.88	3365.31	5878.44	4782.99	4359.88	3734.42	3544.65	3393.62	5420.62	3474.51	3714.37	5277.31	3892.38	3993.64	4251.11	3098.7	3247.97	5256.31	3953.25	4079.87
ENSMUSG00000004540	Psg17	17.1791	52.1325	16.7818	20.4268	69.3145	13.1841	26.9899	59.9161	9.93761	19.4336	38.417	15.7139	17.3553	57.0244	21.2877	32.762	381.72	71.8483	30.1018	319.78	47.6353	13.8391	55.9455	9.93761	54.7603	956.344	57.7096
ENSMUSG00000004542	Psg19	13.6667	9.93761	9.93761	9.93761	9.93761	9.93761	9.93761	9.93761	9.93761	9.93761	9.93761	9.93761	9.93761	9.93761	9.93761	9.93761	21.0573	9.93761	9.93761	13.8809	9.93761	9.93761	9.93761	9.93761	9.93761	21.3093	9.93761
ENSMUSG00000004552	Ctse	150.476	51.0241	37.7272	176.413	36.8637	24.6649	305.653	78.1677	45.7	942.221	46.1931	17.377	263.616	27.1766	33.0223	345.094	32.4946	21.6925	421.743	31.2807	33.8645	1075.67	70.4982	98.5592	164.361	13.6537	13.8362
ENSMUSG00000004558	Ndrg2	494.848	141.912	537.944	172.811	100.273	875.138	171.328	133.14	1029.6	263.569	81.0764	373.141	452.936	79.3827	407.945	142.65	48.1632	306.196	106.223	61.9694	394.529	140.158	103.101	480.831	328.091	28.5536	175.297
ENSMUSG00000004561	Mettl17	98.2348	122.592	129.836	86.9651	121.468	127.823	105.125	100.57	91.0876	116.469	81.0764	59.6233	161.93	103.978	127.018	104.988	120.838	124.984	108.319	96.1419	124.493	127.992	105.01	159.98	119.106	127.321	83.5034
ENSMUSG00000004562	Arhgef40	407.3	873.552	965.095	331.08	1007.22	1648.23	311.645	684.205	1321.14	217.088	613.615	1319.26	326.038	899.448	1376.37	213.031	1301.84	1386.14	211.628	1104.14	1641.75	158.939	1029.04	1543.17	278.007	1307.33	728.265
ENSMUSG00000004565	Pnpla6	387.955	313.05	376.9	343.659	289.452	320.948	419.463	276.459	237.515	352.754	172.597	245.605	524.827	260.072	331.235	471.445	249.464	308.587	528.809	209.839	364.675	418.898	362.013	396.863	321.414	159.844	135.587
ENSMUSG00000004567	Mcoln1	323.802	246.797	301.47	285.249	225.606	244.907	375.144	242.377	271.383	333.249	225.053	268.996	376.804	250.337	308.015	328.243	150.359	230.448	352.082	153.657	279.07	346.256	248.382	250.061	309.729	143.592	158.761
ENSMUSG00000004568	Arhgef18	562.027	642.989	583.55	548.442	746.76	819.171	811.021	1210.91	857.001	509.675	519.039	516.537	488.883	675.846	549.212	574.372	416.974	461.57	637.938	557.395	698.937	776.469	1008.23	644.494	571.698	433.317	229.256
ENSMUSG00000004591	Pkn2	1563.36	1703.92	1299.15	1608.75	1964.87	1730.57	1323.42	1430.43	1408.6	2289.77	2064.97	1935.04	1645.14	1826.57	1468.16	2289.02	2480.18	1796.21	2191.39	2487.64	1777	1713.64	1764.98	1488.07	2529.66	3273.57	2871.52
ENSMUSG00000004609	Cd33	164.778	51.0241	239.977	77.8552	63.0697	23.703	17.9712	123.725	46.9224	23.0069	20.5854	21.6926	105.596	43.0995	114.832	32.762	39.9099	141.799	31.2626	22.1349	67.1318	39.3642	45.1171	95.9892	40.8021	26.2234	32.1858
ENSMUSG00000004610	Etfb	344.171	236.106	255.82	343.659	209.975	224.886	400.299	343.742	339.088	568.16	317.892	242.415	450.822	234.515	199.921	424.653	189.641	158.593	411.346	243.51	195.386	623.554	232.275	181.245	299.713	186.229	169.787
ENSMUSG00000004612	Nkg7	17.1791	9.93761	30.6049	13.4068	12.8948	9.93761	9.93761	14.9877	13.9743	9.93761	9.93761	13.7596	9.93761	14.0727	15.5357	13.4898	9.93761	9.93761	13.7122	9.93761	13.6175	9.93761	13.5127	9.93761	9.93761	9.93761	13.8362
ENSMUSG00000004626	Stxbp2	714.689	713.441	380.625	577.178	558.179	413.749	703.266	662.93	491.934	845.695	577.805	442.189	802.825	624.802	393.816	772.712	488.45	308.587	788.626	533.863	464.178	1041.57	756.591	465.565	576.702	403.969	156.556
ENSMUSG00000004630	Pcp2	28.6366	30.5128	27.4417	38.8801	28.6336	24.6649	50.2302	34.9134	37.0317	47.4924	42.3261	28.0302	42.9379	24.3197	26.1906	28.5794	34.6402	19.6189	45.7712	32.5214	24.8513	49.7884	35.0277	30.1649	42.5703	43.9237	19.0982
ENSMUSG00000004631	Sgce	85.8802	24.3589	305.195	126.821	50.4715	219.279	78.4706	52.0083	176.736	49.43	33.4452	97.4238	93.8543	33.9793	221.149	45.7788	24.682	197.732	24.0875	19.217	144.491	25.9718	22.0094	131.021	124.142	27.3961	279.864
ENSMUSG00000004633	Chn2	92.0625	105.384	125.156	82.4138	67.9291	76.1361	31.0607	97.132	56.6112	19.4336	125.569	63.9828	26.7514	154.103	87.3293	25.33	54.2657	88.0255	20.1755	115.356	97.4224	17.5467	76.2797	65.848	22.0715	64.8782	53.1695
ENSMUSG00000004637	Wwox	177.03	217.928	176.559	174.612	193.659	176	198.94	195.485	189.601	149.136	199.294	177.505	165.113	201.64	186.774	192.404	260.246	137.797	250.143	168.275	163.465	216.298	165.892	179.545	117.426	119.177	101.287
ENSMUSG00000004642	Slbp	384.901	587.478	467.203	315.804	632.122	536.914	336.807	461.226	444.104	621.072	823.862	736.356	527.999	626.018	584.524	435.884	633.338	836.691	477.877	838.624	765.577	416.697	592.916	719.957	376.492	809.67	824.948
ENSMUSG00000004651	Tyr	9.93761	9.93761	13.479	9.93761	12.8948	16.1637	9.93761	29.2623	13.9743	9.93761	18.0868	15.7139	9.93761	16.2148	9.93761	9.93761	9.93761	9.93761	9.93761	9.93761	18.5208	9.93761	9.93761	14.9767	9.93761	13.6537	9.93761
ENSMUSG00000004654	Ghrhr	15.5658	9.93761	19.45	9.93761	16.6604	9.93761	9.93761	13.3017	13.9743	9.93761	9.93761	9.93761	13.7495	9.93761	9.93761	9.93761	9.93761	14.7908	13.7122	9.93761	13.6175	9.93761	9.93761	16.3947	9.93761	13.6537	13.8362
ENSMUSG00000004655	Aqp1	2285.8	399.565	4889.75	1685.06	1061.48	676.05	314.042	1252.6	1222.02	58.0797	208.495	416.696	448.707	619.941	2384	261.756	199.453	1390.12	132.383	504.727	1301.63	57.7614	323.199	1296.47	309.729	155.783	1027.09
ENSMUSG00000004661	Arid3b	215.795	110.766	139.192	176.413	123.516	84.2553	161.717	126.294	74.5216	200.346	71.7385	87.7572	232.92	123.569	90.3935	377.857	101.106	76.7128	363.52	113.099	61.0177	126.886	146.898	98.5592	234.582	85.4733	41.6722
ENSMUSG00000004665	Cnn2	326.858	134.402	889.721	265.474	178.016	1736.96	239.725	187.807	1899.53	172.426	164.307	1397.83	157.687	143.118	999.129	284.235	209.263	802.448	191.838	152.532	1330.47	283.499	140.245	1476.2	221.216	180.142	456.858
ENSMUSG00000004667	Polr2e	264.719	275.654	261.411	194.419	200.459	219.279	255.313	312.234	286.562	316.529	341.78	204.119	297.476	286.838	184.751	183.962	196.51	180.965	188.712	263.705	206.352	320.936	289.111	208.444	152.641	206.509	165.377
ENSMUSG00000004668	Abca13	20.0331	9.93761	16.7818	9.93761	14.3493	9.93761	19.6336	13.3017	9.93761	13.4737	9.93761	9.93761	15.6976	9.93761	9.93761	9.93761	9.93761	9.93761	9.93761	13.8809	13.6175	9.93761	13.5127	13.2947	14.9269	9.93761	23.332
ENSMUSG00000004677	Myo9b	1610.17	1548.1	1712.28	1118.58	1643.39	1464.35	982.224	1155.61	1027.27	1184.46	993.699	1478.52	1451.74	1281	1688.04	1309.66	2020.2	1650.5	1129.46	1355.08	1445.84	836.972	1257.02	1394.81	1640.78	1616.84	1100.7
ENSMUSG00000004698	Hdac9	162.736	58.7493	184.959	46.4769	30.9236	35.4782	21.2029	30.2201	40.7747	765.873	65.1744	36.2615	582.969	68.2444	93.4551	59.3676	19.7744	62.0771	121.928	20.707	41.3537	101.393	31.9151	58.8889	217.873	33.0718	99.0681
ENSMUSG00000004707	Ly9	86.9114	23.0641	111.099	57.6615	44.7982	20.7004	14.0368	42.2087	35.7717	15.2595	13.4515	17.377	46.2741	27.1766	41.7142	16.8046	18.432	66.9708	13.7122	13.8809	31.6739	20.5748	22.0094	33.9181	24.119	9.93761	25.957
ENSMUSG00000004709	Cd244	29.7873	13.7713	27.4417	23.8062	24.6922	13.1841	9.93761	17.6985	17.8368	13.4737	9.93761	9.93761	9.93761	14.0727	17.1389	15.2849	15.4339	37.9768	9.93761	9.93761	21.1789	13.8391	15.3213	14.9767	24.119	17.1517	17.5405
ENSMUSG00000004730	Adgre1	402.209	76.2102	634.737	223.211	171.212	46.5319	28.3643	300.31	149.816	19.4336	26.2037	26.8079	202.209	78.148	219.128	52.6063	38.8647	357.998	33.5566	20.707	131.496	67.916	79.1645	164.235	68.4625	18.616	65.605
ENSMUSG00000004748	Mtfp1	23.8796	23.0641	19.45	22.7079	21.3542	18.5479	28.3643	23.2926	19.4663	26.3332	20.5854	23.016	25.5158	27.1766	23.7935	23.0791	19.7744	18.5256	18.7699	17.6362	19.8798	46.3412	20.8034	17.6805	17.5991	13.6537	23.332
ENSMUSG00000004768	Rab23	98.2348	110.766	194.289	176.413	121.468	313.746	174.931	142.548	314.578	109.923	95.0241	183.894	114.12	83.0832	186.774	124.779	159.203	185.756	126.111	115.356	213.328	144.579	121.216	235.625	145.941	201.44	189.62
ENSMUSG00000004771	Rab11a	897.867	746.532	760.372	943.507	867.495	664.056	795.457	787.17	699.555	1501.86	896.388	583.443	961.362	701.367	632.949	1206.77	1284.22	671.842	1013.08	1126.55	625.332	1129.57	785.918	658.061	1292.22	1357.91	799.679
ENSMUSG00000004788	Eif2b2	163.757	211.511	170.959	143.97	186.859	133.452	218.137	243.229	187.262	232.895	284.81	157.262	247.741	232.08	160.464	165.194	194.547	111.351	166.824	233.411	131.496	241.643	206.683	160.831	184.438	260.213	146.626
ENSMUSG00000004789	Dlst	802.209	747.599	717.564	768.431	836.973	872.739	753.552	725.051	830.178	1057.31	725.627	792.633	788.028	760.914	854.882	907.423	1035.63	874.916	753.294	1077.25	882.938	909.574	745.238	774.221	1035.38	1380.16	1114.98
ENSMUSG00000004791	Pgf	30.927	31.7013	163.489	32.0554	40.4949	188.829	29.7202	33.0525	216.486	19.4336	34.4492	274.312	24.2585	45.658	188.797	15.2849	54.2657	98.4958	13.7122	89.3425	113.477	13.8391	51.0466	169.339	49.5684	52.3779	79.0427
ENSMUSG00000004798	Ulk2	650.573	524.49	698.021	619.381	596.847	1209.33	546.408	703.777	1098.4	701.828	655.85	836.167	680.216	652.755	781.244	816.681	456.14	789.707	865.525	625.746	1077.87	728.066	620.354	933.615	866.932	517.301	795.285
ENSMUSG00000004814	Ccl24	52.5924	15.7325	73.4259	28.021	27.0793	16.1637	9.93761	45.7951	22.4783	23.0069	13.4515	13.7596	50.687	18.0487	37.4072	20.7215	13.5837	57.9837	13.7122	9.93761	27.1808	21.9819	20.8034	30.1649	17.5991	9.93761	32.1858
ENSMUSG00000004815	Dgkq	225.991	214.72	255.82	205.219	239.195	222.483	233.729	203.162	198.954	164.044	149.561	212.631	224.45	154.103	262.572	198.968	262.206	270.323	229.327	172.771	265.13	243.847	263.539	289.11	167.708	159.844	163.172
ENSMUSG00000004837	Grap	67.2466	26.8726	101.713	23.8062	22.2108	20.7004	14.0368	29.2623	25.3005	13.4737	13.4515	18.8954	27.9689	16.2148	29.6571	18.1865	13.5837	43.9014	18.7699	13.8809	38.1713	9.93761	18.2464	45.6886	24.119	13.6537	23.332
ENSMUSG00000004842	Pou1f1	33.1787	56.5494	21.8734	35.0084	64.4599	23.703	21.2029	26.3348	22.4783	33.6443	52.8893	45.298	39.572	43.0995	33.0223	60.3295	90.2227	31.9087	95.7312	46.8945	29.4496	21.9819	49.0772	20.0315	51.3035	48.1675	32.1858
ENSMUSG00000004843	Chmp2b	718.76	1061.41	556.559	1189.5	1119.13	811.176	1091.17	1273.87	919.977	1222.51	1510.53	782.015	786.971	1163.13	615.799	1437.81	1153.08	577.067	1222.98	1448.06	720.819	1319.87	1135.93	702.152	1438.98	1744.28	828.244
ENSMUSG00000004846	Plod3	519.277	352.573	669.171	377.797	326.113	701.637	479.347	435.689	671.563	511.532	339.942	580.257	510.027	450.992	679.356	421.846	250.444	580.252	385.355	292.867	610.411	437.606	314.678	512.21	601.724	420.161	740.351
ENSMUSG00000004849	Ap1s1	177.03	139.767	149.475	152.987	105.749	159.955	230.132	167.324	184.924	282.154	185.488	133.795	229.744	173.615	145.271	221.467	109.993	94.4719	200.172	126.635	117.484	276.892	151.648	108.826	161.013	166.951	82.389
ENSMUSG00000004864	Mapk13	165.799	330.142	97.954	228.608	398.734	140.685	402.695	479.951	187.262	168.701	316.973	158.328	190.555	334.273	137.162	243.957	248.484	106.534	220.999	366.868	142.493	352.861	368.64	122.491	115.746	291.608	101.287
ENSMUSG00000004865	Srpk1	846.985	1013.38	697.09	1224.51	1199.84	720.826	1232.43	787.17	630.741	1047.1	855.994	757.593	873.639	775.497	757.033	1371.4	1847.96	1106.64	1061.92	1238.57	822.269	1223.07	907.008	715.718	1205.5	2095.26	1741.15
ENSMUSG00000004872	Pax3	15.5658	9.93761	16.7818	13.4068	12.8948	19.6446	9.93761	17.6985	16.057	9.93761	9.93761	15.7139	9.93761	9.93761	22.5575	13.4898	9.93761	18.5256	9.93761	9.93761	19.8798	9.93761	9.93761	17.6805	9.93761	9.93761	19.0982
ENSMUSG00000004880	Lbr	650.573	832.992	904.61	596.933	955.67	581.695	424.254	905.447	531.596	740.812	1148.84	625.92	545.97	988.155	706.594	535.074	1058.14	687.77	536.085	1240.81	652.188	400.189	885.25	566.482	504.969	989.724	1055.66
ENSMUSG00000004885	Crabp2	245.358	315.187	103.592	55.8092	281.304	67.1694	60.1306	347.148	80.4496	336.036	390.466	148.733	246.682	391.422	162.489	56.4763	269.066	120.977	43.5849	361.263	87.3612	58.8942	418.804	79.6717	155.99	283.507	162.07
ENSMUSG00000004891	Nes	199.477	251.072	523.983	111.453	188.219	924.708	50.2302	77.3028	250.363	70.4423	281.134	434.754	91.7162	345.217	595.621	63.2101	496.283	671.842	45.7712	341.083	507.951	38.1869	163.044	324.751	97.2396	455.579	695.304
ENSMUSG00000004892	Bcan	13.6667	13.7713	21.8734	15.1536	18.6488	18.5479	16.1572	13.3017	13.9743	13.4737	16.7239	13.7596	18.8684	19.73	18.6002	16.8046	25.84	21.6925	9.93761	20.707	23.6561	9.93761	23.1823	16.3947	17.5991	17.1517	23.332
ENSMUSG00000004894	Hapln2	9.93761	13.7713	9.93761	13.4068	14.3493	14.8024	9.93761	13.3017	16.057	9.93761	9.93761	15.7139	13.7495	9.93761	15.5357	9.93761	9.93761	14.7908	13.7122	9.93761	13.6175	13.8391	13.5127	16.3947	14.9269	13.6537	13.8362
ENSMUSG00000004895	Prcc	289.171	421.99	356.416	330.181	389.233	457.74	455.394	482.505	516.431	488.322	571.378	488.923	348.25	525.14	442.256	278.615	392.492	371.544	244.94	532.742	438.31	438.707	406.5	356.144	301.382	549.678	634.874
ENSMUSG00000004896	Rrnad1	307.506	383.546	282.839	345.456	445.555	268.125	328.42	352.257	320.414	343.466	361.99	317.889	312.287	369.537	285.801	359.136	475.722	335.685	380.156	426.277	326.855	351.76	432.053	308.629	323.084	391.825	301.86
ENSMUSG00000004897	Hdgf	935.519	1014.44	699.882	811.528	1129.98	739.216	1052.86	1021.17	739.209	1870.29	1194.74	715.119	1367.2	1140.05	754.007	1054.29	1107.08	766.612	796.94	1341.64	701.921	1424.36	1047.96	641.95	1137.12	1595.6	1235.82
ENSMUSG00000004902	Slc25a18	65.1647	107.538	73.4259	38.8801	77.6049	25.6124	45.2243	59.9161	22.4783	38.6655	73.6094	63.9828	71.3296	76.9127	64.7456	61.2905	109.006	47.2455	88.3722	74.5608	43.4583	45.1869	87.8002	51	56.483	54.4733	42.835
ENSMUSG00000004929	Thop1	191.316	176.199	184.026	224.111	167.81	238.501	417.068	234.706	295.901	312.813	231.49	187.088	418.044	233.297	225.192	230.839	104.07	127.388	204.338	150.282	172.446	281.297	169.689	166.787	262.978	187.243	158.761
ENSMUSG00000004931	Apba3	177.03	232.899	202.684	175.513	224.247	228.09	269.698	286.681	277.221	205.927	181.806	162.591	241.39	233.297	234.286	169.887	219.071	195.337	145.959	237.899	184.417	246.05	235.117	191.447	199.487	309.833	163.172
ENSMUSG00000004933	Matk	69.3257	72.9506	67.7302	65.0373	69.3145	25.6124	65.0429	41.3068	29.3356	58.0797	51.9372	33.953	56.1608	89.2404	44.9084	64.1688	91.2132	69.4113	70.424	91.6103	33.8645	24.6715	79.1645	31.1123	82.0426	102.863	42.835
ENSMUSG00000004934	Pias4	209.677	230.76	225.063	172.811	224.927	198.447	225.334	185.248	201.292	169.632	188.25	205.183	249.858	229.645	239.338	227.09	254.365	237.627	194.963	277.165	199.374	216.298	266.381	225.434	234.582	284.519	256.764
ENSMUSG00000004936	Map2k1	558.973	338.688	454.171	358.033	278.588	546.51	455.394	298.606	551.426	871.683	381.28	531.405	590.368	381.696	439.229	534.138	292.583	483.874	555.833	330.993	469.152	695.063	286.27	479.135	610.065	487.959	733.759
ENSMUSG00000004937	Sgta	426.643	411.311	479.304	459.535	378.375	553.707	778.695	575.275	738.043	612.718	525.466	483.613	629.479	499.615	532.06	509.81	334.708	395.447	432.138	519.295	436.32	733.566	429.214	454.54	424.884	476.829	360.133
ENSMUSG00000004939	Nmrk2	20.0331	30.5128	18.1584	21.5836	37.5939	21.7248	14.0368	18.9056	19.4663	21.852	30.3951	45.298	37.3069	33.9793	33.0223	25.33	28.1053	26.4995	40.2821	26.1856	22.4343	9.93761	32.959	28.2472	31.7763	34.18	45.1502
ENSMUSG00000004945	Tmem242	150.476	183.692	175.626	170.109	148.745	176	161.717	202.309	249.195	174.288	248.042	167.918	144.951	185.803	118.896	165.194	144.46	115.363	158.481	218.82	156.477	162.252	168.74	131.874	109.023	123.25	128.958
ENSMUSG00000004947	Dtx2	293.246	301.298	261.411	221.412	278.588	188.829	266.102	219.363	170.887	222.668	216.774	216.887	243.507	299.002	249.441	269.25	291.604	351.623	326.084	370.231	210.338	279.094	259.75	205.045	293.034	289.583	299.66
ENSMUSG00000004951	Hspb1	721.813	575.735	811.554	1061.12	657.221	1160.56	1289.9	927.571	1758.44	1074.94	1035.01	1303.34	1022.66	1076.86	1204.9	735.291	650.958	1017.46	601.563	1086.22	1097.76	797.371	838.895	998.049	1780.87	1667.41	1470.91
ENSMUSG00000004952	Rasa4	663.803	130.109	675.686	272.665	133.75	112.529	53.9573	111.728	169.717	167.77	53.8402	284.942	224.45	117.452	503.808	94.5954	57.298	368.357	80.9973	57.3606	218.311	83.587	62.7583	219.488	100.609	38.5534	221.552
ENSMUSG00000004961	Syt5	13.6667	9.93761	13.479	15.1536	14.3493	20.7004	9.93761	13.3017	17.8368	16.7707	13.4515	20.3245	13.7495	16.2148	15.5357	15.2849	15.4339	23.6643	20.1755	13.8809	18.5208	20.5748	15.3213	18.8843	22.0715	21.3093	35.7902
ENSMUSG00000004980	Hnrnpa2b1	4569.09	4833.1	4562.24	4708.56	5970.95	5645.35	4160.54	4453.36	3809.59	6917.82	5442.98	4996.88	5040.61	4914	4985.2	4981.94	6341.01	6876.22	4565.57	5376.66	5861.2	5285.01	6201.23	6298.94	5733.26	9133.74	10154.5
ENSMUSG00000004988	Fxyd4	140.253	201.884	97.0138	89.6927	173.934	74.5089	48.9831	91.9701	39.5325	131.414	162.464	159.394	152.381	171.177	102.627	162.377	309.239	126.586	301.122	180.637	137.495	129.099	117.406	107.116	192.8	157.814	163.172
ENSMUSG00000004994	Ccdc130	78.6521	70.7745	64.8747	63.1977	63.765	78.5746	85.76	61.6644	91.0876	76.1149	72.6742	63.9828	93.8543	69.4853	83.2394	80.3804	65.3394	55.5194	91.5278	76.8405	75.2459	102.503	95.4575	78.8105	75.2635	84.4479	45.1502
ENSMUSG00000004996	Mri1	90.0029	106.461	71.5294	75.1158	92.7327	70.4352	117.193	112.586	81.6335	110.858	95.0241	99.5689	91.7162	103.978	76.0673	72.769	76.3221	61.2597	72.543	79.1179	74.2336	95.8368	106.919	88.2697	63.343	62.8051	57.7096
ENSMUSG00000005034	Prkacb	733.007	689.957	1247.97	764.84	769.144	1685	624.241	865.455	1407.43	579.3	709.101	1229.02	542.799	624.802	1312.83	501.389	846.725	1191.85	422.782	757.957	1351.36	615.853	618.462	1349.88	471.602	1184.94	1401.7
ENSMUSG00000005043	Sgsh	159.672	154.776	252.092	190.819	156.237	216.075	272.095	233.854	198.954	143.542	138.493	175.375	124.761	189.458	197.899	170.825	64.3372	124.183	190.796	101.8	212.332	246.05	173.486	215.24	73.5656	48.1675	72.336
ENSMUSG00000005045	Chd5	37.5986	28.1004	38.725	24.8835	30.9236	59.7932	25.5931	18.9056	44.4744	16.7707	21.7629	47.5234	35.0205	24.3197	62.6781	20.7215	39.9099	67.7847	18.7699	20.707	54.8697	13.8391	22.0094	47.4649	37.2349	70.0476	58.841
ENSMUSG00000005054	Cstb	768.626	1001.64	622.639	755.861	791.527	416.148	564.37	739.517	561.924	837.342	1381.09	681.139	593.539	1158.27	623.87	922.39	1622.86	682.992	764.725	1692.28	584.549	675.261	754.698	362.083	690.131	1968.83	779.903
ENSMUSG00000005057	Sh2b2	127.976	90.2863	197.087	94.2343	105.065	148.717	51.4748	99.7107	128.719	60.9436	105.222	238.161	77.7852	144.339	224.181	53.5756	175.899	376.325	52.2737	134.522	273.096	41.7047	99.2809	181.245	65.0516	224.753	287.563
ENSMUSG00000005069	Pex5	343.152	605.626	387.142	349.049	738.62	405.75	381.133	551.445	309.909	354.611	474.96	395.45	361.999	613.864	444.275	331.052	556.981	489.45	309.443	682.89	491.039	532.236	603.324	374.808	301.382	420.161	560.156
ENSMUSG00000005078	Jkamp	143.321	133.329	165.356	163.803	109.853	240.904	178.533	197.191	248.028	267.287	165.228	217.951	220.215	167.519	188.797	275.806	109.006	147.399	259.509	123.253	179.43	291.208	155.448	205.895	247.946	129.356	184.112
ENSMUSG00000005087	Cd44	4001.32	9365.67	4857.19	3702.23	18207.5	4347.89	1790.3	12489.2	3065.63	3173.25	11333.3	6131.79	2454.65	7418.18	6492.06	1648.28	23789.5	10263.4	1318.58	13181.1	5286.42	741.267	13483.6	2752.05	6457.03	30056.9	20910.9
ENSMUSG00000005089	Slc1a2	130.023	259.623	117.662	68.7093	446.234	89.1157	37.599	126.294	45.7	128.614	327.998	417.758	157.687	235.732	178.682	53.5756	615.718	194.539	97.8314	243.51	131.496	19.1059	182.025	51	152.641	248.057	242.461
ENSMUSG00000005102	Eif2ak4	447.004	754.004	563.074	710.968	1003.15	643.266	617.057	622.082	561.924	366.685	699.92	715.119	479.368	644.248	578.47	409.679	943.624	699.716	521.533	930.493	678.049	424.4	733.885	633.471	341.444	626.568	605.207
ENSMUSG00000005103	Wdr1	4263.84	3188.47	2713.45	4225.59	4432.82	3032.84	3286.67	2782.38	2896.55	4009.4	2211.85	2966.99	3672.07	3130.32	3079.94	5847.15	7409.71	3242.99	4799.36	4665.33	2924.6	3306.3	2793.18	2310.38	7034.04	6479.78	3745.93
ENSMUSG00000005107	Slc2a9	85.8802	197.604	91.3683	37.9179	113.955	49.0386	47.7332	115.158	45.7	38.6655	229.651	96.3508	82.0787	378.048	109.75	47.738	79.3068	39.681	51.1949	88.2081	42.4075	34.6209	93.5446	51	71.8662	108.985	52.0303
ENSMUSG00000005124	Wisp1	99.2628	145.129	233.452	159.297	307.784	338.551	80.9025	103.147	249.195	117.404	137.57	354.016	131.141	135.791	272.672	78.4799	133.639	333.294	102.029	82.5301	184.417	38.1869	115.501	165.936	154.316	102.863	673.33
ENSMUSG00000005125	Ndrg1	3077.43	4558.82	3409.42	2324.24	5795.98	2196.64	1301.87	4704.35	1910.03	4536.52	5092.33	2560.37	3325.45	5947.99	3727.47	3159.85	4632.27	4976.4	2850.14	5339.69	3254.76	1160.37	3487.47	1571.15	8203.07	8378.21	9472.37
ENSMUSG00000005131	4930550C14Rik	13.6667	15.7325	24.1619	22.7079	17.6806	14.8024	17.9712	13.3017	16.057	20.6643	13.4515	13.7596	17.3553	21.3178	17.1389	16.8046	15.4339	17.377	20.1755	9.93761	15.4877	15.8406	20.8034	23.2588	14.9269	17.1517	20.5657
ENSMUSG00000005142	Man2b1	685.176	450.82	934.387	723.538	521.544	448.942	651.78	607.614	623.743	348.11	440.981	459.184	613.624	556.741	696.506	375.049	439.495	694.142	351.042	361.263	568.633	439.807	433	552.066	473.27	490.994	495.322
ENSMUSG00000005148	Klf5	1323.22	1658.03	648.697	1334.04	2137.13	773.597	928.35	1056.91	531.596	2419.69	2289.87	2184.54	1181.19	2358.77	1497.41	2144.97	2985.18	1590.78	1743.56	4110.83	1309.59	679.661	1591.88	511.362	4090.61	5026.37	3043.98
ENSMUSG00000005150	Wdr83	191.316	298.093	194.289	250.19	308.463	258.519	286.479	301.162	306.407	336.965	360.153	264.744	263.616	317.246	276.712	243.02	285.725	245.603	243.899	305.203	272.1	302.219	297.634	255.155	234.582	289.583	210.543
ENSMUSG00000005161	Prdx2	757.432	713.441	663.588	584.361	411.627	588.892	799.049	617.827	762.535	1180.74	811.009	718.304	1007.86	715.95	707.602	933.616	347.441	491.043	853.055	472.227	671.087	1309.97	641.169	820.853	791.877	428.257	516.201
ENSMUSG00000005198	Polr2a	2510.67	1856.54	2077.02	2384.38	2359.58	2240.61	2927.54	2564.58	2231.87	3653.97	2549.65	2163.3	2785.43	2274.93	2427.37	2793.18	1903.74	2994.57	2662.07	2753.13	2589.47	2627.67	2262.53	2018.76	3048.31	2540.29	2467.27
ENSMUSG00000005202	Shbg	13.6667	13.7713	9.93761	9.93761	18.6488	9.93761	14.0368	9.93761	9.93761	9.93761	9.93761	13.7596	15.6976	16.2148	13.6478	9.93761	15.4339	9.93761	9.93761	9.93761	9.93761	9.93761	13.5127	13.2947	17.5991	13.6537	9.93761
ENSMUSG00000005204	Senp3	389.992	477.513	385.28	481.089	579.209	480.933	538.026	540.381	549.093	558.877	523.63	472.992	445.535	521.493	444.275	459.279	649.979	467.146	388.474	658.24	466.167	559.743	578.724	435.033	381.498	734.813	494.223
ENSMUSG00000005220	Corin	18.65	21.735	19.45	21.5836	21.3542	16.1637	17.9712	41.3068	25.3005	16.7707	31.4189	20.3245	20.2925	22.842	23.7935	15.2849	25.84	19.6189	17.2759	28.7641	22.4343	17.5467	27.6548	21.1371	19.9208	25.0329	20.5657
ENSMUSG00000005225	Plekha8	173.967	155.848	170.959	176.413	201.138	196.844	201.34	156.222	184.924	191.972	156.014	114.562	181.017	174.834	159.452	188.652	248.484	173.776	201.213	254.73	172.446	214.094	192.459	179.545	184.438	206.509	179.705
ENSMUSG00000005232	G6pc2	9.93761	13.7713	15.2679	9.93761	9.93761	9.93761	17.9712	9.93761	28.0102	19.4336	9.93761	9.93761	17.3553	16.2148	9.93761	13.4898	9.93761	13.1767	9.93761	9.93761	9.93761	9.93761	9.93761	9.93761	19.9208	9.93761	9.93761
ENSMUSG00000005233	Spc25	72.4394	46.5701	35.7191	35.0084	28.6336	41.4767	22.7089	33.9853	35.7717	150.068	108.926	41.9384	105.596	65.7596	49.1319	51.6356	26.9801	38.8302	93.63	37.3982	31.6739	54.3546	39.1052	32.9883	58.2023	46.0504	48.6009
ENSMUSG00000005237	Dnah2	43.017	25.6267	52.4173	34.0295	49.7656	49.8717	28.3643	39.4955	30.6456	25.2432	34.4492	45.298	29.1712	39.2283	45.9677	45.7788	39.9099	47.2455	34.6919	30.0289	32.7729	44.0295	41.1208	44.7979	28.025	37.4678	39.3343
ENSMUSG00000005251	Ripk4	809.333	1009.11	431.829	1170.65	1184.92	674.451	1058.84	1147.1	657.567	1267.05	1023.08	886.071	1167.45	1153.41	695.497	1462.13	956.348	690.956	1190.77	1349.48	895.867	1762.04	1221.07	787.787	1602.42	1116.16	941.403
ENSMUSG00000005262	Ufd1l	387.955	324.801	348.966	406.542	399.413	364.953	388.321	359.069	412.603	466.969	399.651	392.263	419.102	351.297	329.216	503.26	459.078	359.592	487.232	437.484	342.78	535.537	411.232	327.297	349.789	440.4	468.947
ENSMUSG00000005267	Zfp287	46.229	32.8803	85.7144	62.2769	40.4949	129.432	78.4706	63.4101	121.678	43.5944	38.417	49.7393	38.4418	29.9424	59.5701	45.7788	28.1053	77.5225	46.8604	27.484	98.4272	62.2851	53.0101	105.406	39.0242	28.5536	46.3031
ENSMUSG00000005268	Prlr	19983.2	4868.32	3124.71	33374.9	3793.96	2377.31	37639.2	9627.08	6195.39	25207.2	2708.45	1338.37	17513.8	1705.06	2107.64	47826.1	2669.07	970.475	42297.7	1961.13	1397.11	72863.1	6978.75	4279.66	23085.3	1032.21	508.509
ENSMUSG00000005299	Letm1	491.794	442.278	402.969	386.78	446.234	391.352	415.87	367.583	421.937	636.853	509.856	529.281	533.284	500.83	448.311	550.98	616.697	471.926	429.02	598.854	412.44	620.254	335.507	381.594	524.988	720.65	588.725
ENSMUSG00000005312	Ubqln1	1100.37	1312.22	910.193	1659.92	1488.08	1153.36	1955.5	1547.85	1244.17	2135.71	1685.86	1134.52	1635.63	1666.18	1110.09	1948.54	1531.84	1116.99	1429.76	1733.73	1049.03	2231.7	1489.72	948.876	1702.49	2569.62	1866.38
ENSMUSG00000005320	Fgfr4	25.0979	18.9262	238.113	9.93761	20.4782	209.665	14.0368	27.3209	111.106	13.4737	15.2244	56.3419	9.93761	14.0727	245.4	13.4898	15.4339	101.712	13.7122	17.6362	98.4272	13.8391	15.3213	266.192	14.9269	23.8208	65.605
ENSMUSG00000005338	Cadm3	156.607	44.3283	342.448	356.237	100.273	161.56	264.903	91.1092	297.068	32.6245	20.5854	67.2425	135.391	57.0244	310.034	88.9165	32.4946	240.02	33.5566	22.1349	215.321	39.3642	29.8041	160.831	150.966	25.0329	132.273
ENSMUSG00000005339	Fcer1a	9.93761	32.8803	23.0307	9.93761	24.6922	9.93761	9.93761	122.869	16.057	9.93761	19.3652	13.7596	9.93761	18.0487	13.6478	9.93761	13.5837	19.6189	9.93761	9.93761	17.0748	9.93761	23.1823	9.93761	14.9269	9.93761	13.8362
ENSMUSG00000005354	Txn2	283.059	333.347	319.166	290.642	231.042	315.346	390.716	309.679	400.935	387.116	347.292	251.985	301.708	351.297	263.582	263.63	314.137	196.934	206.421	310.81	237.242	378.177	284.376	243.268	246.276	432.305	316.155
ENSMUSG00000005355	Casp14	9.93761	15.7325	13.479	9.93761	9.93761	9.93761	9.93761	9.93761	21.0038	13.4737	13.4515	9.93761	9.93761	16.2148	13.6478	9.93761	9.93761	14.7908	13.7122	13.8809	9.93761	9.93761	13.5127	16.3947	14.9269	17.1517	15.836
ENSMUSG00000005357	Slc1a6	15.5658	9.93761	13.479	9.93761	9.93761	19.6446	9.93761	9.93761	19.4663	9.93761	9.93761	15.7139	13.7495	9.93761	13.6478	9.93761	9.93761	17.377	9.93761	9.93761	13.6175	9.93761	9.93761	17.6805	9.93761	9.93761	9.93761
ENSMUSG00000005360	Slc1a3	32.0571	18.9262	126.092	48.3548	23.051	122.996	52.7171	25.3362	146.302	25.2432	20.5854	132.728	31.5389	24.3197	110.766	23.0791	18.432	101.712	15.6382	13.8809	99.4317	17.5467	22.0094	94.275	31.7763	19.9927	267.765
ENSMUSG00000005362	Crbn	796.103	438.007	456.033	374.204	351.228	464.938	314.042	349.703	458.103	1022.04	499.755	502.73	732.009	363.457	362.528	899.004	425.786	361.185	769.921	420.672	459.203	686.262	416.911	446.059	850.253	506.172	498.619
ENSMUSG00000005364	Il5ra	402.209	78.3806	77.2136	15.1536	15.565	14.8024	9.93761	24.323	13.9743	612.718	59.5229	44.1813	619.966	50.7345	79.1436	576.243	28.1053	26.4995	278.237	20.707	18.5208	156.731	26.562	28.2472	1050.39	35.2816	41.6722
ENSMUSG00000005370	Msh6	354.354	468.972	396.452	493.662	466.589	542.512	452.999	408.448	419.603	404.759	520.875	542.026	368.344	435.189	423.083	333.86	480.618	497.416	295.921	471.107	530.832	431.003	448.142	403.649	212.86	410.041	445.868
ENSMUSG00000005371	Fbxo11	1497.22	1347.45	1397.78	1384.31	1702.4	1712.98	1044.48	1270.47	1450.58	1464.73	1740.94	2040.15	990.955	1417.09	1651.73	1076.74	1778.47	2036.68	894.621	2019.39	1928.16	931.575	1418.77	1456.7	1479.01	2193.37	2529.88
ENSMUSG00000005373	Mlxipl	18.65	58.7493	44.6459	21.5836	63.0697	44.0121	35.0106	45.7951	44.4744	25.2432	51.9372	47.5234	31.5389	69.4853	49.1319	21.9168	45.0873	49.739	26.5451	72.2785	46.5945	21.9819	80.1253	47.4649	17.5991	50.2763	41.6722
ENSMUSG00000005374	Tbl2	146.388	123.666	177.493	196.219	124.199	259.319	302.058	153.659	278.389	271.004	123.721	159.394	239.272	151.662	208.009	154.865	63.3342	180.965	161.61	101.8	183.42	326.441	116.454	222.036	152.641	79.3151	148.833
ENSMUSG00000005378	Wbscr22	168.863	222.206	181.226	161.099	169.851	176	214.538	204.867	188.432	199.416	192.852	182.829	211.742	196.768	192.843	168.948	231.818	184.958	157.438	247.998	173.444	260.371	217.111	168.488	132.531	238.939	163.172
ENSMUSG00000005397	Nid1	1119.7	141.912	4821.83	3177.07	708.096	5766.06	2430.75	721.647	3534.39	501.32	117.251	2114.47	1259.4	375.616	4522.25	752.131	148.393	4873.69	220.999	101.8	3411.88	297.815	104.056	2479.93	2169.44	137.493	5745.19
ENSMUSG00000005410	Mcm5	193.357	316.255	192.423	84.2352	144.657	120.582	89.3981	152.804	131.065	471.611	452.002	159.394	360.941	491.106	203.965	139.83	122.809	110.549	135.517	239.021	137.495	188.734	144.047	101.984	155.99	205.495	121.22
ENSMUSG00000005413	Hmox1	1006.75	510.611	1341.95	772.92	839.008	432.146	194.14	522.508	451.104	336.965	573.214	631.23	858.842	1223.89	1510.52	738.098	1398.73	3223.88	478.917	1637.39	1195.22	263.675	501.135	465.565	2439.61	2164.03	6095.6
ENSMUSG00000005417	Mprip	4203.81	4473.44	3674.6	4994.93	6100.48	4104.87	4519.67	5303.32	3514.57	4223.78	4464.47	3620.97	4333.62	5120.55	4086.54	5733.97	6449.64	4108.5	5735.52	6091.35	3547.13	5521.49	5401.95	3289.51	4887.75	5740.43	3889.83
ENSMUSG00000005442	Cic	1702.76	1484.06	1564.33	2114.17	1753.94	2429.28	2455.89	2044.73	2038.3	1663.34	1388.44	1703.6	1556.37	1726.94	1919.02	1545.38	790.933	1644.13	1275.98	1244.18	1883.41	1886.33	1637.28	1886.51	1002.03	619.486	927.121
ENSMUSG00000005447	Pafah1b3	144.343	146.201	90.4266	141.264	113.955	118.167	180.935	150.241	180.246	218.018	160.622	141.266	217.038	177.272	110.766	168.948	88.2408	92.0558	163.696	127.762	105.455	186.528	146.898	115.662	169.382	91.6193	52.0303
ENSMUSG00000005465	Il27ra	54.6998	24.3589	103.592	33.0454	23.8775	20.7004	17.9712	29.2623	26.6665	15.2595	13.4515	26.8079	22.9741	22.842	41.7142	19.4833	13.5837	28.3332	9.93761	9.93761	29.4496	9.93761	15.3213	25.2962	17.5991	9.93761	25.957
ENSMUSG00000005469	Prkaca	380.828	349.369	410.417	380.492	336.295	564.103	566.765	445.053	699.555	600.65	494.245	476.178	492.054	457.07	460.42	414.359	262.206	353.217	301.122	450.934	490.044	667.56	464.229	472.35	373.154	355.388	293.062
ENSMUSG00000005470	Asf1b	45.1609	51.0241	44.6459	28.021	29.4019	31.0881	33.7042	35.8371	31.9425	79.8883	66.1138	20.3245	90.6467	70.7252	41.7142	35.8259	31.4111	24.6231	39.1737	39.7978	29.4496	47.4927	32.959	27.2748	26.097	35.2816	23.332
ENSMUSG00000005481	Ddx39	750.308	630.179	756.649	471.21	661.291	296.14	358.372	632.294	285.394	777.011	493.327	268.996	963.476	626.018	616.808	815.745	820.297	598.571	737.705	788.208	390.549	668.66	571.154	486.768	723.491	1379.15	573.342
ENSMUSG00000005483	Dnajb1	1569.46	1523.55	1712.28	1764.06	1705.11	1842.49	1719.67	1958.79	1975.33	2019.71	1854.76	2534.89	1883.98	1748.81	2204.46	1714.69	1009.2	1863.1	1583.54	1583.61	1968.93	2258.1	1479.31	1826.32	2101.07	1506.59	2216.81
ENSMUSG00000005493	Msh4	25.0979	42.0745	34.7082	22.7079	49.7656	29.2948	26.9899	27.3209	17.8368	21.852	37.4313	33.953	32.7075	44.3807	36.3196	24.2152	47.14	37.1206	32.4138	38.6006	32.7729	21.9819	35.0277	40.3141	22.0715	54.4733	35.7902
ENSMUSG00000005501	Usp40	339.079	498.867	333.135	235.803	409.592	335.35	269.698	288.385	258.538	279.367	331.673	338.079	286.896	324.544	286.811	290.79	608.865	303.008	377.037	332.114	312.92	285.702	397.035	368.021	323.084	375.631	296.361
ENSMUSG00000005505	Kbtbd4	135.139	189.044	138.257	182.717	207.257	132.648	185.737	198.044	143.959	170.563	191.931	127.388	146.012	166.3	128.033	131.367	208.282	136.997	134.472	216.575	125.493	204.172	197.201	131.874	134.208	199.412	177.501
ENSMUSG00000005506	Celf1	1548.1	1410.42	1239.6	1424.71	1346.34	1387.61	1623.9	1161.56	1358.46	2067.96	1255.33	1356.42	1597.58	1301.66	1271.47	2006.53	1920.38	1385.34	1748.75	1706.84	1355.34	1967.72	1387.56	1280.36	2134.42	2837.65	2331.05
ENSMUSG00000005510	Ndufs3	164.778	176.199	188.691	250.19	227.645	260.12	387.123	300.31	332.086	385.258	327.998	290.256	294.302	307.516	268.632	282.362	216.129	196.135	275.116	277.165	232.26	459.615	274.905	272.983	214.531	248.057	188.519
ENSMUSG00000005514	Por	496.884	414.515	572.381	581.667	532.399	428.946	672.135	493.57	502.433	413.116	286.648	359.329	351.423	432.757	491.7	586.535	1116.86	896.417	458.127	974.185	544.759	724.766	388.517	321.357	773.53	1222.37	1253.4
ENSMUSG00000005533	Igf1r	729.954	2194.86	1991.42	783.694	2857.38	3903.41	676.925	3019.76	3425.95	335.107	2665.31	3804.64	434.962	2164.36	2798.54	231.776	2309.89	3030.4	212.669	3564.16	3897.18	227.319	2735.48	2852.93	398.186	2040.64	2801.22
ENSMUSG00000005534	Insr	1407.67	954.672	1490.83	1504.61	1028.92	1319.65	1111.52	1289.19	1217.35	1142.69	930.355	1199.29	987.784	876.359	1240.2	1306.85	753.738	1152.83	1340.4	931.613	1456.77	1434.26	1053.64	1356.66	1017.04	630.614	940.304
ENSMUSG00000005540	Fcer2a	161.714	53.2391	193.356	28.021	28.6336	14.8024	17.9712	21.1647	16.057	20.6643	21.7629	21.6926	18.8684	22.842	21.2877	25.33	40.9515	21.6925	34.6919	22.1349	19.8798	17.5467	28.735	29.2102	42.5703	44.9883	25.957
ENSMUSG00000005553	Atp4a	13.6667	23.0641	13.479	16.6298	17.6806	17.3959	14.0368	14.9877	13.9743	9.93761	15.2244	9.93761	20.2925	21.3178	18.6002	9.93761	22.2966	26.4995	18.7699	15.9075	22.4343	13.8391	16.853	22.2107	14.9269	19.9927	23.332
ENSMUSG00000005566	Trim28	1330.34	1410.42	1309.38	984.806	1206.62	1768.14	1403.63	1462.76	1651.15	2023.42	1726.25	2022.1	1727.57	1900.69	1911.96	1366.72	1294.99	1817.71	1302.99	1620.58	1925.17	1807.13	1279.72	1503.32	1452.33	1944.55	2560.64
ENSMUSG00000005575	Ube2m	402.209	279.928	333.135	349.948	320.682	354.552	451.801	354.812	381.099	777.011	381.28	391.201	598.825	403.58	364.546	449.921	343.524	331.7	403.029	273.8	369.651	693.963	323.199	326.448	426.553	423.197	297.461
ENSMUSG00000005580	Adcy9	197.437	247.866	254.888	252.887	284.699	464.138	281.684	295.199	388.1	83.656	138.493	299.822	136.454	208.947	325.178	183.024	170.99	334.888	214.751	231.166	392.539	195.351	237.96	379.049	137.561	118.158	155.453
ENSMUSG00000005583	Mef2c	768.626	117.219	1262.86	336.471	161.003	840.758	61.3605	169.885	638.906	30.5644	31.4189	461.308	206.447	103.978	694.488	47.738	24.682	554.765	34.6919	24.8652	619.364	64.5403	76.2797	1050.61	82.0426	25.0329	267.765
ENSMUSG00000005609	Ctr9	7601.25	2256.76	1423.83	936.324	769.144	1036.64	1130.68	860.349	958.462	15978.1	2073.24	1897.88	11395	1257.91	1786.89	3510.61	935.794	1056.48	3075.61	971.945	1180.3	9878.14	1719.58	1529.61	5281.32	1290.14	1245.71
ENSMUSG00000005610	Eif4g2	12795.6	11184.2	9968.08	10770.8	13583.6	15060.1	9060.19	10999.4	13001.8	21500.7	15836.7	18543.6	14598.1	12384	13043.9	14697.5	15810.5	15290	12193	18283.6	15460.6	16307	11775.3	11741.3	20875.6	22165.9	25986
ENSMUSG00000005611	Mrvi1	165.799	30.5128	623.569	127.724	87.9271	1337.24	62.5892	87.6634	1064.58	34.6581	24.0262	932.79	62.6845	54.5146	820.585	31.7284	23.5026	609.721	28.9298	22.1349	1220.08	29.7549	23.1823	1067.57	31.7763	22.5819	257.864
ENSMUSG00000005615	Pcyt1a	542.688	445.481	630.084	684.031	655.864	577.697	560.778	639.102	557.258	584.87	555.768	499.544	542.799	547.018	567.372	719.387	560.897	623.261	536.085	775.884	556.696	509.13	519.113	418.069	705.143	741.894	682.12
ENSMUSG00000005621	Zfp592	518.259	718.779	671.033	635.544	867.495	736.818	680.517	681.652	663.399	535.669	646.668	596.186	548.084	753.623	731.814	697.87	938.73	815.986	563.108	1019	775.523	570.745	745.238	608.881	840.246	1186.97	934.811
ENSMUSG00000005625	Psmd4	747.255	671.811	563.074	593.341	562.928	455.34	606.28	606.763	531.596	885.605	679.721	563.265	791.199	686.783	506.835	809.197	700.88	449.621	751.215	793.81	460.198	986.575	621.3	396.863	648.431	775.276	565.65
ENSMUSG00000005628	Tmod4	47.2946	42.0745	35.7191	47.4167	44.7982	31.9757	45.2243	46.6871	26.6665	34.6581	37.4313	32.788	36.1666	40.5238	40.6432	60.3295	52.2377	56.3415	66.1779	48.0661	47.6353	38.1869	56.9216	54.5158	85.4256	76.2305	25.957
ENSMUSG00000005640	Insrr	13.6667	9.93761	42.6833	15.1536	9.93761	9.93761	25.5931	17.6985	17.8368	9.93761	15.2244	13.7596	13.7495	14.0727	17.1389	13.4898	15.4339	9.93761	9.93761	9.93761	17.0748	9.93761	9.93761	14.9767	14.9269	15.5452	35.7902
ENSMUSG00000005656	Snx6	839.862	476.446	528.636	667.869	411.627	533.715	693.687	470.589	624.91	1242.92	508.019	414.571	1013.15	418.169	434.183	954.196	551.107	389.073	806.292	517.054	432.34	1137.27	499.242	483.375	1210.5	680.185	438.174
ENSMUSG00000005667	Mthfd2	147.41	120.443	119.536	64.1178	82.4267	93.1609	46.4804	59.9161	43.2452	137.013	73.6094	113.492	129.015	88.0099	119.912	145.47	441.453	309.384	119.836	360.142	137.495	145.684	50.0627	64.9802	529.993	867.329	1165.51
ENSMUSG00000005672	Kit	494.848	10806.4	927.874	1083.56	11701	580.096	1139.06	13387.6	890.822	405.688	13978.8	1078.25	686.559	11273.5	1540.78	104.988	4232.98	577.863	137.606	10184.6	938.633	457.414	13093.9	307.78	216.202	2008.27	217.149
ENSMUSG00000005674	Tomm40l	102.345	79.465	97.954	96.9568	85.8656	114.141	118.399	106.581	135.755	111.794	71.7385	104.928	107.728	94.1583	107.715	103.1	55.2777	74.282	90.4762	72.2785	84.3374	132.418	78.2033	109.681	54.7603	56.5631	56.5768
ENSMUSG00000005677	Nr1i3	91.0328	69.6855	81.9396	79.6796	78.9835	101.24	103.917	90.248	119.33	93.9941	60.4667	90.9821	95.9912	83.0832	96.5144	87.9692	48.1632	65.3415	87.3197	69.9935	76.2578	120.243	68.5669	94.275	47.8283	46.0504	49.7462
ENSMUSG00000005681	Apoa2	13.6667	15.7325	19.45	15.1536	12.8948	9.93761	9.93761	13.3017	9.93761	9.93761	9.93761	9.93761	9.93761	9.93761	9.93761	9.93761	15.4339	14.7908	9.93761	9.93761	13.6175	9.93761	13.5127	13.2947	9.93761	9.93761	15.836
ENSMUSG00000005682	Pan2	456.166	452.956	382.487	421.812	542.575	295.34	400.299	428.879	259.706	421.473	400.569	260.491	501.569	465.579	420.055	674.481	490.408	361.185	761.607	515.933	344.771	377.076	626.031	351.054	670.115	513.254	247.963
ENSMUSG00000005683	Cs	1260.13	1223.64	1146.55	1151.79	1132.01	1199.73	1373.7	1639.74	1260.5	1916.69	1540.82	1308.64	1523.61	1567.76	1226.08	1492.07	1169.71	952.159	1256.23	1666.51	1082.84	1996.32	1407.42	1107.41	1445.66	1357.91	1225.94
ENSMUSG00000005686	Ampd3	307.506	135.475	362.934	1120.37	411.627	488.931	320.033	215.952	306.407	210.578	171.676	147.666	326.038	245.469	323.159	623.024	159.203	494.23	438.376	111.97	294.005	315.431	156.397	304.386	448.243	133.425	230.356
ENSMUSG00000005687	Bcas2	484.669	610.963	399.245	434.387	630.765	426.547	351.184	501.23	351.926	592.296	620.96	497.42	443.421	517.847	426.11	396.576	530.549	465.553	422.782	559.636	417.415	451.912	605.216	368.869	358.134	543.608	671.132
ENSMUSG00000005696	Sh2d1a	77.6178	20.3612	25.2718	19.2276	9.93761	14.8024	16.1572	9.93761	17.8368	58.0797	20.5854	17.377	42.9379	9.93761	18.6002	79.4303	13.5837	13.1767	54.4265	9.93761	15.4877	60.0257	15.3213	14.9767	68.4625	13.6537	15.836
ENSMUSG00000005698	Ctcf	450.058	484.987	618.916	651.707	603.631	910.317	724.817	749.729	929.307	774.227	766.023	745.912	609.395	673.415	637.994	510.746	561.876	673.435	520.494	728.827	780.496	795.171	620.354	797.113	576.702	907.791	770.015
ENSMUSG00000005699	Pard6a	33.1787	38.6659	44.6459	40.7947	31.6778	42.3238	48.9831	39.4955	49.3584	40.646	37.4313	33.953	53.9761	44.3807	43.8466	32.762	22.2966	36.2613	31.2626	31.2807	33.8645	53.2158	41.1208	38.5034	33.6139	18.616	25.957
ENSMUSG00000005705	Agrp	23.8796	24.3589	24.1619	22.7079	22.2108	25.6124	26.9899	26.3348	30.6456	19.4336	19.3652	23.016	24.2585	21.3178	21.2877	20.7215	31.4111	19.6189	25.3272	22.1349	27.1808	19.1059	22.0094	36.6805	19.9208	13.6537	23.332
ENSMUSG00000005716	Pvalb	20.0331	9.93761	21.8734	9.93761	9.93761	9.93761	9.93761	21.1647	16.057	9.93761	9.93761	13.7596	13.7495	9.93761	13.6478	9.93761	9.93761	9.93761	9.93761	9.93761	9.93761	9.93761	9.93761	9.93761	19.9208	15.5452	9.93761
ENSMUSG00000005718	Tfap4	51.5365	54.3441	76.2673	41.7477	62.3741	138.274	67.4921	79.0324	154.501	58.0797	60.4667	70.4953	65.9324	76.9127	64.7456	16.8046	23.5026	54.6964	27.745	19.217	91.3888	52.0753	83.9653	120.784	24.119	26.2234	39.3343
ENSMUSG00000005732	Ranbp1	595.614	606.693	486.751	587.953	524.936	487.331	551.198	565.913	559.591	1226.22	879.863	503.792	903.233	605.357	557.283	592.149	747.865	503.788	472.68	751.235	451.244	808.371	537.091	408.739	635.086	1072.67	839.231
ENSMUSG00000005763	Cd247	165.799	132.256	185.892	150.283	146.701	176.802	106.333	132.285	109.931	143.542	97.8075	108.141	118.378	113.78	111.783	134.189	139.542	128.189	147.003	125.507	121.49	142.369	132.637	167.638	117.426	113.064	132.273
ENSMUSG00000005774	Rfx5	433.77	284.203	282.839	514.318	346.476	337.751	526.051	311.382	269.048	310.955	230.571	186.024	323.923	290.487	284.791	481.738	321.974	292.645	550.636	260.339	298.983	428.802	440.571	287.412	324.753	232.86	145.523
ENSMUSG00000005779	Psmb4	776.767	788.161	756.649	730.721	607.023	557.705	711.647	769.3	850.004	1306.96	903.732	780.953	989.898	881.22	582.506	857.843	681.303	530.074	829.154	982.027	634.284	1052.57	606.162	552.914	755.182	886.548	779.903
ENSMUSG00000005800	Mmp8	23.8796	9.93761	20.6831	13.4068	9.93761	14.8024	16.1572	16.4093	13.9743	13.4737	9.93761	17.377	20.2925	9.93761	15.5357	9.93761	9.93761	13.1767	9.93761	9.93761	13.6175	9.93761	9.93761	18.8843	14.9269	9.93761	24.6581
ENSMUSG00000005802	Slc30a4	1254.02	865.013	855.291	1550.4	1041.81	1158.96	891.236	828.015	973.622	1680.04	1029.5	1488.07	1077.62	897.017	1098.99	2391.91	1283.25	1081.16	1967.99	1266.58	1191.24	1413.36	865.384	858.158	2114.41	1406.46	2299.2
ENSMUSG00000005803	Sqrdl	383.883	167.632	251.16	352.643	146.701	138.274	435.034	251.751	250.363	493.893	174.439	128.457	373.632	149.222	158.439	744.646	114.924	123.381	712.764	146.906	126.494	566.344	174.435	159.98	575.034	104.904	95.738
ENSMUSG00000005804	Bloc1s6	313.618	221.137	257.683	349.948	221.529	252.914	352.382	309.679	299.403	428.901	343.617	211.567	308.055	272.239	222.16	425.589	215.148	193.74	448.771	230.044	234.253	462.916	285.323	280.622	338.106	300.721	180.807
ENSMUSG00000005813	Metap1	854.109	917.315	538.875	1142.82	961.096	496.128	910.392	668.036	502.433	1151.97	743.989	582.381	836.647	639.386	558.292	1244.18	1245.08	804.041	1136.74	1066.05	612.401	1108.67	799.162	552.914	900.29	1121.22	1124.87
ENSMUSG00000005823	Gpr108	333.987	364.322	343.379	354.44	356.657	392.151	523.656	480.803	430.104	463.255	420.776	385.889	445.535	431.542	340.321	410.615	287.684	229.65	381.196	344.447	329.841	579.547	436.785	313.72	379.83	266.29	201.735
ENSMUSG00000005824	Tnfsf14	34.2929	15.7325	42.6833	21.5836	19.5784	9.93761	9.93761	20.056	16.057	15.2595	9.93761	9.93761	31.5389	18.0487	25.0028	24.2152	22.2966	61.2597	9.93761	9.93761	17.0748	9.93761	15.3213	16.3947	28.025	15.5452	25.957
ENSMUSG00000005836	Gata6	53.6468	23.0641	128.9	84.2352	34.6587	66.3518	80.9025	24.323	79.2652	19.4336	13.4515	35.1106	30.3606	19.73	66.81	24.2152	19.7744	73.4711	15.6382	15.9075	49.7107	23.3439	13.5127	45.6886	35.4323	15.5452	66.7288
ENSMUSG00000005846	Rsl1d1	808.315	914.112	571.45	671.46	859.356	733.619	596.701	756.536	594.584	1580.74	1392.11	944.469	1058.6	886.081	732.822	871.875	1418.31	1069.22	800.057	1470.47	854.096	1116.37	798.216	581.746	1003.7	2084.13	2412.34
ENSMUSG00000005871	Apc	15456.3	4348.57	3063.3	4789.35	2715.63	2460.45	3816.98	2379.95	2087.28	22110.4	3123.36	2625.13	17602.5	2409.8	2920.58	20652	3156.44	2711.9	13009.7	3169.85	2603.39	11508.2	2566.16	2398.55	17733.7	3421.24	3249.4
ENSMUSG00000005873	Reep5	711.636	853.272	1005.11	574.484	790.849	1419.58	529.644	1046.69	1482.07	880.964	1339.78	1422.25	707.698	1158.27	1017.29	507.003	670.536	886.064	444.613	1062.69	1275.78	511.331	996.877	1098.09	718.487	953.309	1107.29
ENSMUSG00000005881	Ergic3	391.01	393.157	430.898	404.746	417.056	578.497	566.765	580.381	654.068	512.46	546.586	624.859	498.398	502.046	513.898	435.884	379.761	321.34	419.663	454.296	460.198	587.248	463.283	472.35	543.339	388.788	440.372
ENSMUSG00000005882	Uqcc1	162.736	171.916	154.148	206.118	175.975	199.248	228.932	240.673	215.317	238.474	175.36	136.998	188.436	188.24	151.35	243.02	259.266	130.591	251.184	210.961	157.475	314.33	233.222	155.724	154.316	262.239	146.626
ENSMUSG00000005883	Spo11	15.5658	9.93761	18.1584	20.4268	9.93761	19.6446	16.1572	9.93761	13.9743	15.2595	13.4515	18.8954	13.7495	9.93761	18.6002	15.2849	9.93761	14.7908	20.1755	9.93761	17.0748	15.8406	13.5127	18.8843	14.9269	13.6537	19.0982
ENSMUSG00000005886	Ncoa2	1727.18	1392.27	1399.64	2170.73	1760.05	1894.45	2010.56	1895.83	1879.71	1911.13	1726.25	1748.19	1501.41	1612.72	1492.37	1829.74	1005.29	1323.23	1798.63	1266.58	1513.46	1931.43	1593.77	1489.76	1494.02	1051.43	816.159
ENSMUSG00000005892	Trh	15.5658	9.93761	19.45	15.1536	9.93761	23.703	9.93761	9.93761	19.4663	9.93761	9.93761	89.9075	13.7495	9.93761	33.0223	9.93761	13.5837	60.4416	9.93761	13.8809	79.2906	9.93761	9.93761	28.2472	9.93761	13.6537	49.7462
ENSMUSG00000005893	Nr2c2	955.871	1258.86	914.846	1032.39	1087.93	1051.83	1004.97	907.149	877.993	811.353	907.404	962.519	829.248	1033.12	855.891	1268.5	1911.57	1004.72	1307.15	1339.4	1023.17	919.474	1005.39	1020.09	1337.25	1465.12	1131.46
ENSMUSG00000005897	Nr2c1	204.577	225.414	221.333	204.319	210.655	366.553	185.737	225.33	328.584	304.453	267.347	308.324	223.391	250.337	278.732	326.371	289.644	215.29	279.277	271.557	325.86	246.05	273.011	323.903	236.253	296.671	165.377
ENSMUSG00000005899	Smpd4	360.463	417.719	291.223	394.865	461.161	385.752	388.321	424.623	339.088	381.544	440.981	371.016	317.576	450.992	379.686	396.576	608.865	347.639	381.196	537.224	406.47	367.17	471.8	328.994	251.287	560.807	309.557
ENSMUSG00000005907	Pex1	333.987	364.322	248.365	285.249	362.766	268.926	252.915	307.124	256.203	346.253	424.449	313.638	334.5	361.025	295.899	371.305	471.806	314.964	461.245	446.451	268.117	464.016	419.75	315.417	331.43	317.933	257.864
ENSMUSG00000005917	Otx1	9.93761	17.4019	15.2679	13.4068	15.565	18.5479	14.0368	13.3017	9.93761	9.93761	13.4515	13.7596	17.3553	9.93761	17.1389	9.93761	17.0031	18.5256	13.7122	9.93761	15.4877	9.93761	13.5127	9.93761	9.93761	9.93761	13.8362
ENSMUSG00000005936	Kctd20	492.812	331.21	564.935	585.259	471.338	579.296	523.656	462.077	538.595	555.164	463.022	453.873	483.597	459.501	499.772	627.702	403.264	488.654	594.288	456.537	487.06	548.74	492.618	522.386	781.869	607.346	567.848
ENSMUSG00000005947	Itgae	40.8608	34.0508	66.779	19.2276	23.051	19.6446	22.7089	32.1145	23.9069	18.1446	22.9076	20.3245	24.2585	29.9424	23.7935	24.2152	35.7037	21.6925	26.5451	23.5173	17.0748	20.5748	29.8041	18.8843	40.8021	29.6983	20.5657
ENSMUSG00000005949	Ctns	3183.25	1099.83	745.482	244.795	339.01	268.125	210.939	267.088	248.028	6720.16	721.954	496.358	4671.79	487.459	666.241	2636.04	487.471	348.436	2322.31	375.836	371.642	3141.32	483.155	473.198	2898.22	349.314	211.644
ENSMUSG00000005950	P2rx5	52.5924	57.65	41.6982	35.0084	83.8027	24.6649	28.3643	43.1083	21.0038	58.0797	50.0288	47.5234	76.7106	63.2705	38.4901	64.1688	132.655	70.224	56.5734	69.9935	49.7107	28.5101	49.0772	36.6805	70.1652	99.799	55.4426
ENSMUSG00000005951	Shpk	399.155	123.666	137.321	35.0084	45.511	59.7932	55.1954	46.6871	45.7	668.413	113.552	101.713	487.826	84.3156	110.766	610.861	39.9099	63.7104	388.474	51.5661	80.3007	539.938	67.6005	79.6717	373.154	46.0504	32.1858
ENSMUSG00000005952	Trpv1	85.8802	24.3589	35.7191	16.6298	16.6604	9.93761	9.93761	16.4093	19.4663	75.1706	20.5854	18.8954	91.7162	21.3178	27.3604	78.4799	22.2966	23.6643	82.052	13.8809	15.4877	29.7549	18.2464	24.2861	110.704	29.6983	24.6581
ENSMUSG00000005958	Ephb3	402.209	1147.86	585.411	675.052	2036.08	1007.86	696.082	1484.88	1077.41	415.902	927.601	840.414	566.055	1638.24	931.546	683.836	1433.97	844.655	749.137	1953.29	1010.24	682.962	1916.33	883.593	593.384	1376.11	510.707
ENSMUSG00000005968	Tuft1	1382.24	610.963	277.25	525.992	435.377	119.777	421.859	370.137	139.272	1075.87	296.757	156.196	1373.54	406.012	271.662	1501.42	1094.35	224.066	1439.11	672.806	136.496	833.672	468.015	122.491	2059.37	659.952	180.807
ENSMUSG00000005973	Rcn1	296.302	208.302	645.905	534.074	244.63	748.012	514.076	294.348	790.525	441.9	242.525	672.644	351.423	188.24	575.443	291.726	195.529	517.329	259.509	250.242	633.289	553.141	252.172	602.945	309.729	259.2	1060.05
ENSMUSG00000005980	Dnase1	87.9422	83.7982	59.1446	64.1178	57.4923	69.6194	50.2302	60.7906	57.8136	70.4423	89.4518	74.8229	81.006	97.8429	75.0409	85.1256	103.082	61.2597	72.543	83.6665	74.2336	72.4057	75.3172	70.1791	97.2396	72.1108	74.5739
ENSMUSG00000005981	Trap1	579.329	652.596	599.372	516.114	497.12	614.48	528.446	650.165	630.741	809.497	828.452	744.851	743.636	741.47	710.629	608.99	597.118	464.756	570.384	619.023	595.491	798.471	659.145	530.018	540.002	690.302	550.266
ENSMUSG00000005982	Naa60	382.864	314.118	498.851	465.822	301.674	389.752	516.471	429.73	504.766	403.83	340.861	360.391	363.056	401.149	388.77	376.921	309.239	320.543	347.922	305.203	383.583	536.638	326.04	446.059	293.034	334.13	244.662
ENSMUSG00000005983	1700037C18Rik	163.757	120.443	184.026	185.418	125.564	151.928	165.321	163.055	167.377	175.219	146.795	152.998	142.827	161.422	165.526	166.132	148.393	132.193	156.395	134.522	139.495	210.787	137.392	165.085	119.106	152.736	100.178
ENSMUSG00000005986	Ankrd13d	91.0328	101.075	76.2673	119.592	98.2176	75.3227	185.737	102.288	79.2652	122.076	89.4518	78.0626	116.249	96.615	84.2624	138.89	119.853	75.9028	176.207	91.6103	83.3287	184.322	132.637	88.2697	140.914	119.177	72.336
ENSMUSG00000005994	Tyrp1	18.65	13.7713	19.45	9.93761	9.93761	20.7004	9.93761	33.9853	23.9069	9.93761	9.93761	9.93761	13.7495	9.93761	19.974	9.93761	9.93761	9.93761	9.93761	9.93761	15.4877	9.93761	13.5127	13.2947	14.9269	9.93761	13.8362
ENSMUSG00000006005	Tpr	2794.56	2168.18	2550.62	2931.99	2506.75	3378.99	2403.21	2710.06	2803.26	3903.61	3447.4	3081.65	2925.98	2374.56	2675.49	3015.8	2650.47	3106.04	2406.47	2777.77	3019.08	3095.12	2520.76	2770.7	3762.08	4115.08	3290.05
ENSMUSG00000006007	Pdc	9.93761	17.4019	15.2679	9.93761	14.3493	13.1841	9.93761	9.93761	9.93761	13.4737	15.2244	17.377	17.3553	9.93761	13.6478	13.4898	13.5837	14.7908	9.93761	9.93761	15.4877	9.93761	9.93761	9.93761	9.93761	9.93761	13.8362
ENSMUSG00000006010	BC003331	305.469	288.477	286.566	317.602	281.983	409.749	329.619	343.742	389.267	381.544	402.406	351.892	338.731	283.188	262.572	367.56	191.604	310.182	322.964	260.339	329.841	344.054	306.156	344.266	229.57	203.468	267.765
ENSMUSG00000006014	Prg4	151.498	99.9977	254.888	287.945	122.834	158.35	117.193	82.4879	180.246	118.339	100.589	131.66	191.615	115.004	250.451	136.069	111.966	297.428	94.6808	104.061	231.264	82.4711	89.716	195.697	201.159	131.391	283.164
ENSMUSG00000006019	Dhx34	131.047	147.273	158.819	164.704	148.064	180.811	249.318	224.478	186.093	159.386	112.627	118.839	179.957	160.202	169.575	175.518	70.3401	121.778	160.567	113.099	131.496	151.208	156.397	150.617	166.034	71.0795	52.0303
ENSMUSG00000006021	Kptn	112.608	126.888	112.037	78.7676	129.658	89.1157	105.125	133.996	122.852	83.656	125.569	122.046	114.12	154.103	117.88	88.9165	168.044	96.8867	104.127	143.529	94.4067	111.379	157.347	106.261	130.854	111.025	87.9573
ENSMUSG00000006024	Napa	1100.37	1174.54	1025.58	1281.07	1549.12	914.314	1494.61	1256.86	954.963	1197.45	945.044	831.92	1027.95	1216.6	1103.02	1247.92	1365.46	1027.81	1173.11	1312.51	904.819	1528.85	1496.34	870.028	1088.75	1188.99	928.22
ENSMUSG00000006050	Sra1	434.788	454.023	443.931	461.331	518.152	330.549	448.208	364.177	339.088	515.246	428.123	281.753	522.713	440.051	438.22	510.746	634.317	466.35	561.03	510.33	376.617	532.236	504.92	356.144	506.637	504.148	343.642
ENSMUSG00000006057	Atp5g1	81.7522	112.918	93.251	216.015	224.927	180.811	262.506	249.195	212.98	366.685	351.885	170.049	341.904	335.489	193.854	223.341	292.583	170.58	220.999	366.868	199.374	345.155	273.958	184.646	244.606	337.167	225.954
ENSMUSG00000006058	Snf8	217.834	332.279	204.549	288.844	309.821	176	278.089	268.792	198.954	235.685	316.054	189.218	236.096	277.105	180.705	280.489	287.684	185.756	273.035	337.72	191.398	249.355	330.773	158.278	242.935	298.696	196.229
ENSMUSG00000006095	Tbcb	260.644	171.916	216.672	250.19	133.069	212.87	250.517	204.014	301.738	357.398	186.409	223.27	275.257	167.519	178.682	299.218	189.641	172.178	241.818	201.979	178.432	384.781	144.997	194.847	247.946	197.384	180.807
ENSMUSG00000006127	Inpp5k	409.336	533.031	442.069	369.712	552.752	410.549	383.529	591.445	431.27	340.68	508.019	427.318	331.327	606.572	444.275	390.96	460.057	344.451	471.64	446.451	391.544	413.395	639.277	438.425	346.451	256.161	213.846
ENSMUSG00000006134	Crkl	413.408	557.586	494.197	627.463	585.315	764.802	637.412	550.594	686.726	381.544	623.714	655.654	421.217	574.972	572.417	431.205	622.57	661.489	384.315	806.134	725.792	533.337	531.414	588.53	696.803	936.113	1146.84
ENSMUSG00000006143	Upk3bl	17.1791	9.93761	16.7818	9.93761	14.3493	9.93761	14.0368	9.93761	13.9743	15.2595	13.4515	9.93761	18.8684	9.93761	13.6478	13.4898	15.4339	14.7908	13.7122	9.93761	9.93761	13.8391	9.93761	9.93761	39.0242	13.6537	13.8362
ENSMUSG00000006154	Eps8l1	416.463	598.153	223.198	420.914	1049.95	254.516	396.705	570.169	155.671	1410.91	426.286	385.889	1118.84	537.294	384.733	1337.72	713.605	502.992	1342.48	523.777	396.519	1160.37	831.327	450.299	1940.97	467.722	252.364
ENSMUSG00000006169	Clint1	1519.6	1792.5	1368.93	1770.34	2310.07	1932.83	1491.02	2165.54	1882.04	2059.61	2706.62	2274.78	1470.76	2276.14	1666.86	1824.13	2205.17	1653.68	1601.2	2597.42	1893.35	1823.63	2289.96	1633.88	2232.82	3104.67	2488.14
ENSMUSG00000006179	Prss16	30.927	65.3218	29.5605	35.0084	77.6049	66.3518	48.9831	91.9701	86.364	26.3332	76.4124	57.4369	38.4418	68.2444	41.7142	21.9168	51.2216	47.2455	31.2626	63.1187	43.4583	40.5366	108.827	59.7611	17.5991	41.7858	27.2339
ENSMUSG00000006191	Cdkal1	248.415	318.392	219.469	329.283	318.646	304.943	367.956	316.492	300.57	226.387	349.129	300.885	253.033	285.621	254.492	294.536	349.4	212.098	335.443	323.144	280.066	301.118	327.933	299.294	204.503	291.608	231.457
ENSMUSG00000006204	5430419D17Rik	593.578	155.848	108.285	15.1536	17.6806	13.1841	14.0368	9.93761	13.9743	277.509	45.2297	35.1106	275.257	37.9269	50.1826	2462.06	441.453	201.723	2028.26	150.282	89.3756	10761.4	2001.46	477.439	150.966	21.3093	34.5965
ENSMUSG00000006205	Htra1	1182.79	272.448	1326.13	780.103	171.893	750.41	605.083	173.3	1135.72	705.541	191.011	1114.35	574.512	128.459	987.025	175.518	57.298	696.531	82.052	89.3425	553.712	113.596	61.7877	457.084	605.06	178.113	1247.91
ENSMUSG00000006215	Zbtb17	246.377	313.05	239.977	230.407	277.909	230.493	262.506	256.011	236.347	241.262	210.335	183.894	257.266	272.239	250.451	267.376	325.892	268.728	218.916	327.629	251.187	259.269	287.217	250.91	237.924	309.833	228.155
ENSMUSG00000006216	Clcnkb	9.93761	13.7713	9.93761	9.93761	16.6604	9.93761	9.93761	9.93761	9.93761	13.4737	9.93761	17.377	15.6976	14.0727	9.93761	9.93761	9.93761	14.7908	9.93761	9.93761	9.93761	13.8391	9.93761	9.93761	9.93761	9.93761	15.836
ENSMUSG00000006218	Fam131c	13.6667	20.3612	16.7818	17.9706	25.4965	9.93761	19.6336	20.056	17.8368	9.93761	18.0868	13.7596	9.93761	22.842	17.1389	16.8046	15.4339	16.1484	15.6382	23.5173	18.5208	17.5467	18.2464	13.2947	14.9269	17.1517	13.8362
ENSMUSG00000006219	Fblim1	183.153	112.918	929.735	160.198	174.614	2410.89	126.834	137.418	2264.52	78.9455	141.261	2648.49	89.5769	201.64	1744.53	78.4799	280.825	1774.72	53.3509	154.782	2686.93	50.9328	110.734	2121.33	166.034	205.495	1292.95
ENSMUSG00000006221	Hspb7	30.927	17.4019	40.7103	31.0588	18.6488	23.703	17.9712	24.323	29.3356	9.93761	9.93761	25.5675	20.2925	22.842	44.9084	13.4898	9.93761	29.2372	9.93761	15.9075	27.1808	15.8406	15.3213	25.2962	9.93761	15.5452	21.9714
ENSMUSG00000006235	Epor	17.1791	17.4019	42.6833	23.8062	17.6806	18.5479	19.6336	22.2414	17.8368	9.93761	9.93761	17.377	17.3553	16.2148	34.1277	15.2849	15.4339	34.5325	15.6382	15.9075	23.6561	17.5467	16.853	38.5034	19.9208	15.5452	20.5657
ENSMUSG00000006241	Ccdc159	58.8985	31.7013	40.7103	84.2352	41.935	34.6089	77.2537	44.9014	25.3005	44.5721	30.3951	32.788	48.485	40.5238	27.3604	67.0409	32.4946	42.2193	59.7842	33.7523	38.1713	79.1208	51.0466	41.2154	46.0824	21.3093	24.6581
ENSMUSG00000006262	Mob1b	1068.82	1353.85	938.11	1133.84	1643.39	1283.68	799.049	1286.64	944.467	1886.07	1903.41	1537.97	1195.99	1370.92	1212.97	1503.29	2332.4	1451.43	1314.42	2636.63	1412.02	1311.07	1397.02	1094.7	2009.34	3115.79	2924.25
ENSMUSG00000006269	Atp6v1b1	208.657	3635.65	348.035	411.932	4795.65	348.152	669.741	5989.91	528.096	129.547	3948.59	589.815	251.975	4297.97	743.919	68.9524	2142.54	379.512	68.3024	4118.67	409.455	203.07	4889.28	241.57	112.385	2003.21	200.634
ENSMUSG00000006270	Vax1	9.93761	9.93761	15.2679	13.4068	14.3493	13.1841	14.0368	13.3017	9.93761	9.93761	9.93761	21.6926	9.93761	9.93761	15.5357	9.93761	9.93761	9.93761	15.6382	9.93761	13.6175	9.93761	13.5127	9.93761	9.93761	9.93761	13.8362
ENSMUSG00000006273	Atp6v1b2	730.972	776.42	740.829	766.635	784.066	472.136	538.026	796.53	543.261	843.839	834.878	454.935	754.205	972.358	618.825	812.939	1264.65	819.968	736.666	1479.43	559.68	775.369	882.412	429.944	995.357	1830.26	1185.29
ENSMUSG00000006276	Eps15l1	765.573	835.127	689.645	710.968	744.046	688.843	807.429	694.416	622.577	614.574	624.633	707.686	698.185	690.429	755.016	590.277	1088.48	792.096	680.548	718.743	706.894	635.656	720.64	700.456	666.779	802.589	752.436
ENSMUSG00000006281	Tep1	518.259	371.798	604.025	662.481	377.697	483.332	797.851	556.552	487.268	466.04	293.081	287.067	477.253	328.192	430.147	509.81	194.547	347.639	505.942	261.461	366.666	610.352	404.607	421.462	401.523	172.025	136.691
ENSMUSG00000006288	Ttc5	157.629	148.345	154.148	158.396	123.516	168.781	212.139	170.739	189.601	191.042	140.338	132.728	172.536	155.323	129.048	151.107	130.687	103.32	168.91	137.9	145.49	217.4	180.128	176.994	88.8049	86.4984	79.0427
ENSMUSG00000006289	Osgep	155.585	133.329	163.489	164.704	122.834	126.215	177.332	126.294	154.501	171.494	145.872	159.394	155.565	145.56	160.464	212.094	134.623	123.381	234.532	128.889	128.495	210.787	133.588	146.359	169.382	113.064	111.261
ENSMUSG00000006299	Aamp	736.06	823.385	672.894	675.052	942.105	742.415	805.035	816.953	622.577	949.646	790.811	738.48	764.775	926.181	847.821	787.68	837.916	816.783	751.215	964.102	771.545	1077.87	867.276	770.83	721.823	830.913	816.159
ENSMUSG00000006301	Tmbim1	948.748	1662.29	1075.83	1090.74	1838.72	981.473	966.661	1595.49	967.791	730.602	1030.42	827.673	655.905	1485.14	1152.45	1179.64	1934.08	1430.73	1138.82	1403.25	1075.88	1031.67	1934.3	1009.92	1092.09	1998.16	1384.13
ENSMUSG00000006304	Arpc2	1844.2	1293.01	1637.84	1837.67	1630.51	1263.69	1616.71	1629.53	1584.68	2632.21	1794.18	1761.99	1739.2	1488.78	1532.71	2157.13	1993.78	1566.09	1768.49	2128.05	1503.52	1940.22	1368.64	1359.21	2347.89	3026.79	2301.39
ENSMUSG00000006307	Kmt2b	936.536	1028.32	923.221	911.186	1258.84	1075.01	1183.35	1203.25	889.655	833.629	823.862	691.758	1094.53	1058.63	1054.61	863.455	1101.2	1047.72	859.29	1125.43	1075.88	1373.76	1258.91	1047.22	1023.71	1116.16	784.298
ENSMUSG00000006310	Zbtb32	30.927	32.8803	21.8734	35.9824	38.322	20.7004	45.2243	35.8371	22.4783	26.3332	27.2688	25.5675	33.8677	33.9793	30.788	49.69	33.5707	34.5325	33.5566	32.5214	33.8645	57.7614	39.1052	28.2472	42.5703	28.5536	25.957
ENSMUSG00000006311	Etv2	9.93761	9.93761	9.93761	9.93761	9.93761	9.93761	9.93761	13.3017	9.93761	9.93761	13.4515	9.93761	9.93761	16.2148	13.6478	9.93761	9.93761	9.93761	9.93761	13.8809	13.6175	9.93761	18.2464	13.2947	9.93761	9.93761	13.8362
ENSMUSG00000006313	Upk1a	20.0331	32.8803	19.45	23.8062	32.4281	16.1637	26.9899	31.1705	13.9743	24.1357	27.2688	17.377	18.8684	36.6188	18.6002	15.2849	38.8647	27.421	28.9298	37.3982	24.8513	23.3439	36.0538	22.2107	28.025	37.4678	23.332
ENSMUSG00000006315	Tmem147	161.714	241.452	197.087	176.413	154.875	179.207	250.517	215.952	258.538	284.013	290.324	171.114	240.331	251.553	167.55	160.499	170.008	129.791	175.165	203.102	126.494	305.522	222.798	175.293	137.561	151.72	115.689
ENSMUSG00000006333	Rps9	2683.65	4204.49	2879.07	2928.4	3791.25	3017.65	3149	5250.57	4946.52	4304.51	6917.18	4314.23	3870.75	5398.8	3406.73	2986.8	4729.16	2843.28	2949.88	6851.97	3689.34	3751.76	4361.47	3029.26	2813.17	4429.63	4049.11
ENSMUSG00000006335	Tfpt	74.5123	83.7982	86.6574	78.7676	65.1544	82.6334	86.9731	90.248	94.6264	103.37	95.0241	87.7572	100.262	69.4853	87.3293	58.4048	71.3384	77.5225	78.8866	91.6103	81.3104	92.4999	93.5446	83.114	73.5656	90.5957	115.689
ENSMUSG00000006342	Susd2	202.537	76.2102	387.142	163.803	58.1912	184.82	140.075	65.1534	189.601	499.463	66.1138	148.733	394.781	79.3827	326.188	88.9165	50.2038	126.586	73.6016	37.3982	98.4272	86.9321	45.1171	123.345	272.998	59.6888	160.967
ENSMUSG00000006344	Ggt5	172.947	102.153	394.59	98.7709	78.9835	121.387	69.9375	81.6244	141.616	86.4786	114.477	155.13	209.624	144.339	287.82	57.4411	40.9515	136.196	32.4138	27.484	134.496	38.1869	69.5328	128.463	142.589	59.6888	158.761
ENSMUSG00000006345	Ggt1	835.791	325.869	334.067	50.2263	89.3008	442.543	85.76	111.728	381.099	1397.91	203.895	697.067	1309.07	291.704	535.086	1542.58	80.3009	318.152	1701.99	89.3425	519.889	2193.2	208.579	529.17	1509.03	92.6427	352.437
ENSMUSG00000006356	Crip2	806.28	1296.22	1013.48	2059.41	1463.67	1236.51	3128.65	2171.5	1834.23	833.629	1478.4	1230.08	538.57	1476.63	1212.97	1415.36	1089.46	874.119	1239.61	1879.36	1243.95	1535.45	1419.72	1228.65	911.965	1810.03	1198.47
ENSMUSG00000006360	Crip1	686.193	549.045	873.902	667.869	654.507	417.748	636.215	939.483	677.395	983.986	633.814	270.059	899.005	492.322	605.71	853.165	347.441	444.841	964.244	596.613	389.554	923.874	439.624	418.917	751.846	666.022	449.165
ENSMUSG00000006362	Cbfa2t3	169.884	76.2102	404.831	106.021	84.4905	89.1157	46.4804	161.346	105.226	29.5224	28.3213	50.8441	55.0692	55.7704	241.359	35.8259	37.8155	165.786	27.745	30.0289	127.495	47.4927	51.0466	228.831	39.0242	26.2234	73.4553
ENSMUSG00000006369	Fbln1	315.655	55.4475	976.261	950.689	126.929	720.826	1285.11	224.478	1139.22	260.781	74.5441	877.577	361.999	75.6767	793.349	227.09	40.9515	757.852	70.424	51.5661	1061.96	131.311	33.9963	616.512	501.632	41.7858	1068.84
ENSMUSG00000006373	Pgrmc1	808.315	941.864	786.428	1116.78	1023.5	1058.22	1067.22	1265.37	1142.72	1344.08	1255.33	1044.27	901.119	958.991	817.559	1235.76	1082.61	854.211	1151.28	1433.5	921.726	1516.75	1081.07	811.527	1002.03	1123.24	1269.88
ENSMUSG00000006378	Gcat	50.4788	48.8015	78.1596	28.021	28.6336	58.9708	61.3605	62.5376	72.1458	60.9436	42.3261	83.4526	64.8506	41.814	78.1186	29.6382	23.5026	58.8036	28.9298	32.5214	58.9727	46.3412	38.0922	88.2697	28.025	31.9561	41.6722
ENSMUSG00000006386	Tek	403.227	64.2289	942.762	371.509	129.658	135.059	95.4535	142.548	270.216	29.5224	35.4479	83.4526	143.889	101.525	412.991	73.7219	41.9898	302.211	59.7842	37.3982	272.1	34.6209	53.9898	499.489	92.1809	26.2234	195.127
ENSMUSG00000006389	Mpl	13.6667	15.7325	18.1584	9.93761	14.3493	17.3959	17.9712	14.9877	19.4663	19.4336	9.93761	18.8954	13.7495	14.0727	9.93761	16.8046	13.5837	17.377	9.93761	15.9075	19.8798	13.8391	15.3213	17.6805	9.93761	9.93761	9.93761
ENSMUSG00000006390	Elovl1	733.007	501.002	499.782	564.606	411.627	371.353	675.727	461.226	540.928	1250.35	456.593	452.811	925.428	502.046	565.354	878.423	537.402	428.112	717.96	524.898	409.455	1113.07	466.122	432.488	943.654	689.29	509.608
ENSMUSG00000006392	Med8	151.498	182.622	130.772	194.419	163.726	120.582	176.132	146.822	131.065	253.346	155.092	114.562	214.92	143.118	120.927	215.843	255.345	147.399	216.834	227.799	94.4067	216.298	124.073	104.551	221.216	280.469	179.705
ENSMUSG00000006395	Hyi	64.1226	83.7982	93.251	57.6615	88.614	111.724	76.0361	96.2721	136.927	75.1706	88.5223	88.8325	62.6845	80.6168	87.3293	73.7219	67.3416	86.4121	51.1949	89.3425	102.444	57.7614	107.873	107.116	44.33	50.2763	42.835
ENSMUSG00000006398	Cdc20	216.815	123.666	100.774	50.2263	53.2877	86.6864	47.7332	64.282	75.7084	327.676	121.873	93.1304	406.413	127.237	128.033	56.4763	46.1148	78.3319	57.6449	58.5147	77.2692	104.723	62.7583	65.848	112.385	61.7673	49.7462
ENSMUSG00000006403	Adamts4	1250.97	184.763	2279.86	2299.1	816.624	1724.17	435.034	455.267	1096.07	64.751	105.222	1353.24	418.044	286.838	1910.95	560.337	232.798	3236.62	163.696	109.711	1737.22	66.7916	63.7281	563.09	1335.58	648.824	3455.92
ENSMUSG00000006411	Nectin4	441.914	581.072	135.451	802.549	658.577	93.9694	1075.61	1081.58	195.447	755.663	551.177	84.5293	631.594	715.95	156.414	895.262	252.405	72.6598	926.835	411.706	92.395	1033.87	902.278	113.099	583.375	181.157	43.9942
ENSMUSG00000006412	Pfdn2	191.316	181.551	138.257	254.686	222.209	176	287.677	168.178	222.328	300.736	197.453	159.394	267.849	174.834	138.176	228.027	253.385	163.389	210.586	256.974	149.486	384.781	196.253	157.427	155.99	222.727	250.163
ENSMUSG00000006418	Rnf114	646.502	633.381	628.223	879.762	619.911	548.109	960.675	814.4	650.569	741.741	530.058	474.054	625.251	577.403	475.556	774.583	514.884	482.281	697.176	622.385	530.832	1232.97	637.384	565.634	598.388	673.104	603.009
ENSMUSG00000006423	C330007P06Rik	295.283	339.756	331.273	362.525	423.163	530.516	396.705	496.123	502.433	370.4	472.205	521.847	300.65	459.501	337.292	295.472	444.391	426.518	307.363	466.624	495.018	392.485	469.907	474.046	283.016	407.005	422.787
ENSMUSG00000006435	Neurl1a	81.7522	65.3218	65.8272	83.3246	54.6916	67.1694	73.5989	51.1247	38.2851	40.646	54.79	95.2776	82.0787	59.5273	84.2624	120.072	55.2777	56.3415	122.974	32.5214	62.0388	58.8942	47.101	64.1119	98.9246	34.18	58.841
ENSMUSG00000006442	Srm	194.377	191.184	218.536	203.419	182.098	288.937	279.287	175.007	272.551	267.287	216.774	257.301	322.865	235.732	254.492	157.682	339.606	298.225	145.959	283.895	251.187	240.542	154.498	184.646	274.668	668.046	755.732
ENSMUSG00000006445	Epha2	3527.17	5285.61	1848.13	3323.39	9783.72	2394.9	2182.95	5675.12	1605.67	3588.08	5017.06	3231.34	3012.64	6412.14	3088.01	5860.25	7731.69	3846.54	4099.05	10749.2	3186.14	1316.57	5935.43	1215.93	5995.08	7703.6	4664.27
ENSMUSG00000006456	Rbm14	454.13	528.761	424.382	355.338	534.434	410.549	576.345	443.35	426.604	505.033	369.339	375.265	484.654	523.924	483.628	412.487	656.831	553.172	446.692	437.484	457.213	410.094	486.94	473.198	595.052	695.36	731.561
ENSMUSG00000006457	Actn3	28.6366	20.3612	75.3206	15.1536	20.4782	57.3239	16.1572	37.673	55.4072	13.4737	16.7239	18.8954	25.5158	22.842	85.285	9.93761	15.4339	33.6624	15.6382	15.9075	34.9495	17.5467	19.5543	58.8889	9.93761	21.3093	30.9665
ENSMUSG00000006462	A530013C23Rik	51.5365	152.633	124.219	62.2769	169.171	257.718	47.7332	94.5518	101.695	47.4924	88.5223	214.759	63.768	118.676	277.722	41.8339	91.2132	404.211	56.5734	83.6665	385.573	45.1869	171.587	458.781	59.9185	82.3959	231.457
ENSMUSG00000006463	Zdhhc24	69.3257	60.9443	74.3735	62.2769	59.5873	56.4993	118.399	98.8512	74.5216	70.4423	55.7386	41.9384	65.9324	74.44	53.3243	67.0409	45.0873	43.9014	73.6016	48.0661	42.4075	99.1711	82.046	60.6326	54.7603	52.3779	36.9773
ENSMUSG00000006464	Bbs1	67.2466	81.6325	98.894	87.8745	87.9271	175.198	156.91	127.15	184.924	41.6316	86.6625	95.2776	51.7851	99.0704	126.003	88.9165	60.3203	92.0558	70.424	88.2081	119.487	111.379	121.216	134.431	59.9185	72.1108	56.5768
ENSMUSG00000006469	Slc34a3	22.6347	9.93761	9.93761	16.6298	14.3493	9.93761	14.0368	14.9877	9.93761	30.5644	13.4515	13.7596	31.5389	14.0727	15.5357	31.7284	13.5837	13.1767	33.5566	13.8809	13.6175	28.5101	13.5127	14.9767	29.9153	13.6537	9.93761
ENSMUSG00000006471	Ndor1	419.517	438.007	334.067	391.272	349.191	304.143	500.903	452.714	265.545	419.616	273.781	179.635	406.413	385.343	298.928	530.395	421.87	259.957	458.127	385.925	269.113	646.657	553.177	340.873	341.444	475.817	242.461
ENSMUSG00000006476	Nsmf	276.946	638.719	463.48	352.643	560.892	553.707	388.321	376.949	423.103	260.781	363.827	371.016	295.36	523.924	556.274	295.472	574.603	527.684	259.509	539.465	559.68	207.48	573.047	501.185	257.968	575.983	318.354
ENSMUSG00000006494	Pdk1	581.365	252.141	307.989	356.237	271.797	256.117	376.342	281.57	219.991	761.232	488.735	419.883	733.066	385.343	363.537	497.646	175.899	263.944	650.41	390.409	324.865	580.647	297.634	292.504	633.418	182.171	205.038
ENSMUSG00000006498	Ptbp1	3099.81	3760.52	3522.01	2883.51	4497.24	5004.22	2938.31	3912.25	4464.93	4489.19	5002.38	6308.02	3637.2	5278.51	5828.4	2567.76	3703.52	6195.44	2088.52	5416.99	6045.18	3034.63	4189.32	4297.46	3650.34	5703.01	7269.89
ENSMUSG00000006517	Mvd	51.5365	60.9443	47.5733	33.0454	58.8895	35.4782	38.8828	43.1083	29.3356	73.2807	50.9837	41.9384	65.9324	81.8503	64.7456	50.6636	84.2735	53.8725	35.8207	72.2785	36.0285	61.1559	50.0627	37.5936	29.9153	67.982	50.8893
ENSMUSG00000006519	Cyba	132.07	157.991	217.604	144.872	149.426	94.7778	100.292	182.688	132.238	69.4952	130.186	84.5293	106.662	133.348	113.816	90.8104	190.622	117.769	82.052	172.771	77.2692	83.587	132.637	82.2538	71.8662	203.468	116.795
ENSMUSG00000006522	Itih3	25.0979	20.3612	35.7191	19.2276	23.8775	16.1637	16.1572	18.9056	13.9743	18.1446	24.0262	21.6926	20.2925	16.2148	22.5575	19.4833	30.3192	20.6714	17.2759	22.1349	19.8798	13.8391	20.8034	14.9767	17.5991	21.3093	25.957
ENSMUSG00000006526	Tmem110	150.476	191.184	197.087	180.916	305.068	168.781	208.54	256.011	188.432	144.474	213.095	148.733	131.141	247.903	168.562	167.071	201.415	145.799	183.502	256.974	164.463	240.542	279.641	144.656	78.6554	101.842	90.182
ENSMUSG00000006527	Sfmbt1	482.633	458.294	372.245	659.788	754.221	438.544	673.333	566.764	350.759	466.04	478.634	408.198	483.597	493.537	444.275	499.517	648.021	616.889	523.612	636.951	488.055	842.473	599.539	329.842	374.823	483.912	573.342
ENSMUSG00000006529	Itih1	9.93761	13.7713	9.93761	9.93761	15.565	13.1841	14.0368	9.93761	9.93761	13.4737	16.7239	13.7596	13.7495	16.2148	13.6478	13.4898	15.4339	9.93761	9.93761	9.93761	15.4877	9.93761	9.93761	9.93761	14.9269	15.5452	19.0982
ENSMUSG00000006538	Ihh	20.0331	18.9262	15.2679	9.93761	19.5784	16.1637	14.0368	13.3017	16.057	15.2595	9.93761	20.3245	9.93761	16.2148	15.5357	15.2849	17.0031	17.377	17.2759	17.6362	9.93761	15.8406	15.3213	13.2947	19.9208	13.6537	9.93761
ENSMUSG00000006542	Prkag3	13.6667	9.93761	16.7818	13.4068	12.8948	13.1841	9.93761	13.3017	13.9743	13.4737	9.93761	17.377	9.93761	9.93761	18.6002	9.93761	15.4339	18.5256	9.93761	9.93761	13.6175	9.93761	9.93761	16.3947	9.93761	15.5452	19.0982
ENSMUSG00000006567	Atp7b	35.4005	21.735	25.2718	17.9706	14.3493	24.6649	9.93761	14.9877	30.6456	42.6143	19.3652	31.6146	39.572	24.3197	31.9094	64.1688	13.5837	24.6231	44.6795	17.6362	32.7729	54.3546	19.5543	27.2748	31.7763	15.5452	33.3954
ENSMUSG00000006574	Slc4a1	33.1787	17.4019	38.725	16.6298	21.3542	9.93761	17.9712	22.2414	13.9743	9.93761	13.4515	18.8954	21.6556	27.1766	18.6002	9.93761	17.0031	14.7908	15.6382	15.9075	9.93761	13.8391	15.3213	9.93761	19.9208	15.5452	17.5405
ENSMUSG00000006575	Rundc3a	213.756	66.4139	66.779	115.976	38.322	34.6089	142.481	37.673	42.0121	146.339	36.4418	33.953	183.137	41.814	55.4113	124.779	36.762	34.5325	138.65	39.7978	42.4075	201.967	51.0466	40.3141	161.013	34.18	35.7902
ENSMUSG00000006576	Slc4a3	132.07	82.7156	177.493	182.717	89.3008	290.537	238.526	85.9392	248.028	79.8883	66.1138	195.604	116.249	71.9643	260.552	94.5954	64.3372	188.95	107.271	77.9794	223.293	129.099	82.046	254.306	87.1156	47.11	93.5165
ENSMUSG00000006585	Cdt1	168.863	321.596	190.557	107.832	368.195	118.167	100.292	262.828	98.1622	211.508	353.722	131.66	171.475	402.364	191.831	94.5954	200.434	164.987	84.1602	374.715	144.491	134.63	333.614	109.681	103.976	137.493	140.004
ENSMUSG00000006586	Runx1t1	91.0328	30.5128	253.956	137.655	44.0844	105.274	91.8214	41.3068	114.632	27.4083	18.0868	40.8118	57.2511	36.6188	157.426	24.2152	15.4339	92.0558	13.7122	13.8809	85.3456	17.5467	16.853	122.491	29.9153	18.616	58.841
ENSMUSG00000006587	Snai3	39.7775	30.5128	28.5065	13.4068	44.0844	14.8024	17.9712	25.3362	9.93761	25.2432	22.9076	26.8079	21.6556	45.658	35.2266	15.2849	62.3304	34.5325	15.6382	38.6006	27.1808	13.8391	41.1208	16.3947	26.097	50.2763	27.2339
ENSMUSG00000006589	Aprt	227.01	250.004	213.874	223.211	193.659	181.613	210.939	207.426	224.665	465.112	218.614	146.6	328.154	194.331	209.02	181.147	196.51	169.781	144.915	251.364	169.453	284.601	224.693	193.997	261.308	230.834	329.349
ENSMUSG00000006599	Gtf2h1	427.661	492.461	375.038	417.321	552.752	372.152	349.986	400.787	332.086	589.511	661.359	449.624	484.654	519.063	364.546	462.087	661.726	499.806	440.455	705.298	446.269	566.344	495.457	426.551	548.343	1050.42	904.05
ENSMUSG00000006611	Hfe	63.0796	52.1325	127.964	100.584	65.8486	68.8031	123.219	100.57	82.8168	58.0797	40.3776	51.947	71.3296	73.2025	76.0673	51.6356	35.7037	67.7847	38.061	59.6676	58.9727	67.916	71.463	66.7152	33.6139	21.3093	40.5054
ENSMUSG00000006638	Abhd1	159.672	182.622	153.213	115.071	327.471	141.488	125.629	183.541	118.156	151.932	140.338	150.865	141.765	179.71	162.489	110.648	231.818	224.066	141.783	234.533	185.414	145.684	196.253	141.248	162.687	122.232	146.626
ENSMUSG00000006641	Slc5a6	600.703	297.025	239.977	335.572	204.537	211.268	423.057	252.603	281.892	779.796	228.731	205.183	834.533	279.538	270.652	3121.5	225.935	287.862	4214.38	316.416	330.837	3833.15	460.444	372.263	648.431	164.92	275.465
ENSMUSG00000006642	Tcf23	13.6667	13.7713	19.45	13.4068	17.6806	16.1637	16.1572	14.9877	17.8368	13.4737	9.93761	33.953	17.3553	16.2148	15.5357	13.4898	9.93761	29.2372	9.93761	9.93761	27.1808	9.93761	9.93761	20.0315	14.9269	15.5452	17.5405
ENSMUSG00000006649	Nphs1	37.5986	46.5701	45.6237	25.9433	19.5784	13.1841	25.5931	22.2414	29.3356	26.3332	30.3951	30.4315	25.5158	32.6455	19.974	15.2849	25.84	21.6925	17.2759	23.5173	21.1789	23.3439	23.1823	20.0315	14.9269	30.832	25.957
ENSMUSG00000006651	Aplp1	38.6902	67.5052	117.662	36.9521	56.793	248.11	61.3605	63.4101	249.195	25.2432	59.5229	260.491	30.3606	69.4853	195.876	41.8339	89.2319	203.319	35.8207	89.3425	249.195	73.5264	59.844	198.247	42.5703	78.2874	211.644
ENSMUSG00000006673	Qrich1	1366.97	1695.38	1404.29	1645.56	1894.33	1684.2	1573.62	1587.83	1479.73	1777.49	2123.72	1878.77	1525.72	1831.43	1683	1510.77	1834.25	1773.92	1366.38	2333.05	1706.39	1413.36	1663.77	1426.18	1699.15	2150.88	2068.51
ENSMUSG00000006675	P4htm	38.6902	56.5494	73.4259	50.2263	78.9835	54.8478	62.5892	72.1059	48.1418	29.5224	74.5441	80.2199	37.3069	73.2025	66.81	27.5097	50.2038	49.739	31.2626	48.0661	55.8972	28.5101	61.7877	67.5819	31.7763	42.8563	30.9665
ENSMUSG00000006676	Usp19	1432.1	1380.53	1236.8	1259.52	1497.58	1533.91	1615.52	1604	1476.23	1522.27	1351.72	1398.89	1438	1656.46	1557.93	1376.08	1302.82	1324.83	1236.49	1621.7	1521.42	1645.45	1598.5	1333.77	1460.67	1678.54	1253.4
ENSMUSG00000006678	Pola1	219.873	399.565	287.497	189.019	358.693	404.15	147.292	354.812	335.587	410.33	511.692	341.266	336.615	461.933	276.712	183.962	364.092	225.662	178.292	434.122	317.897	215.196	329.827	306.083	192.8	336.155	280.964
ENSMUSG00000006699	Cdc42	3769.33	3217.29	3607.61	3549.62	3422.31	3135.97	2767.13	3585.54	3421.28	4977.33	4570.95	3309.9	3516.73	3626.06	2995.22	4757.45	4300.5	3109.22	3835.14	4706.78	2985.27	3925.54	3134.65	2472.3	4629.26	6069.14	4730.18
ENSMUSG00000006705	Pknox1	243.319	231.83	333.135	293.338	256.856	376.152	353.58	321.602	393.934	264.499	252.638	263.681	233.979	244.252	310.034	337.605	322.953	380.309	292.801	307.446	361.69	337.45	236.065	343.418	288.026	385.752	450.264
ENSMUSG00000006711	D130043K22Rik	20.0331	23.0641	20.6831	19.2276	39.7724	20.7004	9.93761	22.2414	17.8368	18.1446	21.7629	33.953	26.7514	29.9424	28.5152	23.0791	26.9801	27.421	28.9298	17.6362	21.1789	20.5748	30.8638	34.8431	31.7763	25.0329	25.957
ENSMUSG00000006715	Gmnn	66.206	66.4139	53.3818	30.0549	37.5939	41.4767	22.7089	48.4663	34.5042	123.01	95.9521	36.2615	107.728	75.6767	39.5687	49.69	46.1148	36.2613	67.2405	58.5147	47.6353	72.4057	47.101	36.6805	47.8283	40.7121	29.736
ENSMUSG00000006717	Acot13	192.337	166.561	138.257	187.218	135.796	106.887	203.74	194.632	132.238	253.346	214.015	157.262	179.957	157.763	106.698	249.578	129.702	136.196	296.961	146.906	132.496	339.651	176.332	136.988	171.055	115.102	103.505
ENSMUSG00000006720	Zfp184	38.6902	62.0402	38.725	96.0495	77.6049	89.1157	72.3793	92.8309	96.9839	46.521	113.552	54.1475	59.4278	69.4853	49.1319	35.8259	57.298	43.9014	38.061	81.3932	68.1481	42.8689	83.9653	65.848	26.097	35.2816	55.4426
ENSMUSG00000006724	Cyp27b1	18.65	38.6659	20.6831	33.0454	32.4281	24.6649	17.9712	24.323	21.0038	24.1357	22.9076	24.3053	32.7075	18.0487	27.3604	31.7284	76.3221	36.2613	27.745	49.235	28.3216	20.5748	36.0538	20.0315	53.0339	48.1675	36.9773
ENSMUSG00000006728	Cdk4	1038.3	858.609	907.402	628.361	482.872	852.751	873.278	805.891	988.783	1699.53	1100.19	976.322	1309.07	1006.38	908.345	876.552	475.722	593.792	711.725	672.806	793.426	1364.96	738.615	786.939	793.545	603.299	592.021
ENSMUSG00000006731	B4galnt1	400.173	969.615	416.003	796.264	912.939	373.752	1313.84	1394.69	517.598	606.22	967.076	472.992	497.34	1112.1	498.763	717.516	470.827	309.384	633.781	797.171	357.709	928.275	1289.18	344.266	671.783	416.113	176.399
ENSMUSG00000006732	Mettl1	103.372	144.057	97.0138	97.864	122.834	92.3522	113.575	133.14	113.457	124.879	136.647	82.3755	124.761	137.012	98.5527	117.246	194.547	92.8613	104.127	190.748	93.401	133.524	144.047	88.2697	125.821	226.78	107.938
ENSMUSG00000006736	Tspan31	623.094	449.752	534.221	455.942	349.87	426.547	603.885	559.956	567.756	983.986	542.913	520.785	744.693	514.201	476.565	608.054	338.626	370.747	473.719	433.001	358.704	907.374	505.866	401.953	571.698	365.51	489.827
ENSMUSG00000006740	Kif5b	2989.92	2219.41	2350.57	3421.24	2729.2	3085.61	2679.74	2563.72	2539.72	4736.97	3128.87	3293.98	3125.72	2376.99	2516.13	4847.25	3405.02	2947.59	3677.21	3743.4	2883.83	4306.11	2206.72	2325.64	5061.19	5171	4845.52
ENSMUSG00000006763	Saal1	141.276	105.384	121.41	113.262	94.7903	131.04	106.333	130.574	148.645	191.972	113.552	95.2776	177.837	117.452	102.627	104.988	96.1622	82.3749	114.604	108.582	102.444	142.369	118.359	108.826	130.854	100.82	92.4053
ENSMUSG00000006764	Tph2	25.0979	17.4019	13.479	13.4068	16.6604	16.1637	14.0368	13.3017	9.93761	18.1446	13.4515	17.377	20.2925	21.3178	15.5357	18.1865	23.5026	20.6714	32.4138	22.1349	15.4877	9.93761	15.3213	17.6805	26.097	23.8208	21.9714
ENSMUSG00000006777	Krt23	39.7775	39.8063	120.473	20.4268	30.9236	132.648	9.93761	39.4955	154.501	39.6574	50.9837	289.193	25.5158	55.7704	201.943	18.1865	24.682	208.108	20.1755	49.235	283.053	23.3439	57.8967	253.457	28.025	25.0329	179.705
ENSMUSG00000006782	Cnp	288.152	186.903	535.152	211.517	158.96	866.343	290.074	171.593	815.016	379.686	234.249	890.319	335.558	251.553	541.14	273.933	170.008	470.333	269.914	181.761	779.501	392.485	187.717	613.968	247.946	230.834	371.126
ENSMUSG00000006784	Ttc25	38.6902	36.3702	26.3642	57.6615	30.1651	25.6124	65.0429	27.3209	30.6456	28.4708	27.2688	33.953	35.0205	29.9424	34.1277	66.0842	19.7744	24.6231	68.3024	26.1856	24.8513	46.3412	32.959	32.9883	22.0715	19.9927	23.332
ENSMUSG00000006800	Sulf2	664.821	3267.45	996.733	846.543	3570.84	758.406	766.722	3708.91	742.708	978.418	4495.68	727.861	1364.02	3989.36	1350.15	527.588	2760.08	868.545	449.811	4338.23	702.916	437.606	3684.21	448.603	768.526	2735.49	666.737
ENSMUSG00000006818	Sod2	505.027	748.667	725.009	814.221	1042.49	855.949	854.122	868.858	802.188	559.806	1110.29	932.79	522.713	938.333	798.393	578.114	2259	1309.7	479.956	2055.23	958.524	712.665	847.41	640.254	943.654	4208.13	2237.68
ENSMUSG00000006850	Tmco6	82.7847	92.4464	97.0138	78.7676	78.2943	82.6334	156.91	111.728	94.6264	84.5972	90.3811	57.4369	98.1272	80.6168	89.3724	84.1772	50.2038	57.9837	94.6808	55.0479	69.1639	95.8368	107.873	80.5327	73.5656	74.1717	32.1858
ENSMUSG00000006906	Stambp	176.009	162.277	194.289	233.105	189.579	247.31	305.653	265.384	313.411	252.417	182.726	127.388	168.294	155.323	161.477	255.199	152.324	152.997	238.695	173.895	191.398	324.239	265.434	245.816	164.361	162.89	149.937
ENSMUSG00000006920	Ezh1	598.667	467.904	593.787	722.64	529.685	880.735	882.856	772.704	975.955	495.75	369.339	423.069	558.655	361.025	464.456	816.681	414.036	530.074	833.311	334.356	674.071	751.168	697.935	818.31	835.242	340.204	251.263
ENSMUSG00000006930	Hap1	245.358	311.982	105.469	603.218	370.91	114.141	848.136	300.31	150.987	277.509	310.541	227.525	337.673	392.638	182.728	457.408	251.424	179.367	509.061	219.942	176.437	688.462	369.586	146.359	314.737	175.069	131.168
ENSMUSG00000006931	P3h4	124.904	115.068	223.198	161.099	107.802	339.351	281.684	168.178	392.767	167.77	123.721	300.885	141.765	137.012	253.481	157.682	85.2658	198.53	137.606	111.97	247.203	227.319	142.146	237.324	120.785	64.8782	179.705
ENSMUSG00000006932	Ctnnb1	5855.22	5198.09	5321.48	4473.36	5142.2	5717.3	4493.33	6523.36	5853.73	8610.53	5870.74	5909.9	6270.7	5906.68	5162.72	6500.03	5448.47	5317.19	5810.33	7276.52	5810.49	6442.09	4954.55	5192.66	8920.16	8591.62	6789.85
ENSMUSG00000006941	Eif1b	72.4394	87.0439	155.082	77.8552	93.4187	205.659	100.292	116.015	183.754	70.4423	99.6621	118.839	83.151	75.6767	129.048	33.789	70.3401	122.58	39.1737	84.8025	122.491	58.8942	98.3253	131.874	88.8049	132.408	212.745
ENSMUSG00000006958	Chrd	46.229	32.8803	63.9216	32.0554	24.6922	43.1689	43.9647	20.056	42.0121	33.6443	27.2688	59.6233	67.0133	24.3197	68.8714	37.8435	22.2966	60.4416	22.8209	19.217	70.1789	38.1869	22.0094	55.3922	66.758	18.616	43.9942
ENSMUSG00000006998	Psmd2	1215.36	1000.57	970.678	1264.91	1157.11	1251.7	1245.6	1231.33	1157.88	2392.78	1315.92	1298.03	1722.29	1403.72	1187.75	1764.27	1496.6	1225.29	1593.93	1806.54	1329.48	2237.2	1148.23	1049.76	2019.35	2332.94	1929
ENSMUSG00000007021	Syngr3	13.6667	20.3612	21.8734	16.6298	20.4782	25.6124	16.1572	14.9877	25.3005	13.4737	15.2244	35.1106	13.7495	16.2148	30.788	15.2849	19.7744	25.5674	13.7122	17.6362	23.6561	13.8391	27.6548	38.5034	9.93761	19.9927	28.4926
ENSMUSG00000007029	Vars	384.901	528.761	451.378	454.146	415.699	612.081	612.267	560.807	650.569	647.991	663.195	538.84	616.795	754.838	612.772	465.83	456.14	486.264	381.196	508.089	583.554	665.36	525.737	541.042	396.517	515.278	476.64
ENSMUSG00000007030	Vwa7	65.1647	31.7013	72.4779	23.8062	21.3542	211.268	26.9899	18.9056	218.823	58.0797	20.5854	115.631	39.572	25.7621	112.8	25.33	19.7744	79.9499	35.8207	22.1349	124.493	28.5101	22.0094	144.656	87.1156	23.8208	67.8518
ENSMUSG00000007033	Hspa1l	20.0331	30.5128	35.7191	29.0427	33.1749	33.7356	29.7202	34.9134	23.9069	28.4708	26.2037	38.5462	29.1712	40.5238	44.9084	33.789	37.8155	47.2455	31.2626	37.3982	41.3537	48.6417	30.8638	36.6805	49.5684	47.11	46.3031
ENSMUSG00000007034	Slc44a4	228.029	89.2059	66.779	168.307	43.3692	28.3876	286.479	89.3867	61.4119	221.738	46.1931	23.016	282.664	51.9968	64.7456	471.445	48.1632	27.421	395.752	42.1782	34.9495	770.969	109.781	76.2248	299.713	35.2816	30.9665
ENSMUSG00000007035	Msh5	66.206	51.0241	67.7302	45.5352	49.0588	28.3876	50.2302	33.9853	30.6456	85.538	45.2297	40.8118	94.9229	62.0241	61.6431	90.8104	68.3418	48.078	104.127	42.1782	47.6353	93.6125	62.7583	41.2154	109.023	62.8051	34.5965
ENSMUSG00000007036	Abhd16a	254.53	307.708	337.792	355.338	341.725	347.352	521.261	496.974	364.762	328.605	304.109	238.161	292.186	330.624	293.879	401.256	251.424	262.35	378.077	327.629	299.978	513.532	327.933	271.285	262.978	234.887	173.093
ENSMUSG00000007038	Neu1	281.021	271.379	354.553	261.878	315.93	192.035	288.876	279.015	219.991	195.694	198.374	189.218	275.257	306.3	246.41	262.693	226.916	269.526	224.122	279.408	275.088	374.875	308.997	276.378	226.228	138.509	167.582
ENSMUSG00000007039	Ddah2	107.479	176.199	218.536	172.811	210.655	262.522	167.724	169.885	327.417	119.273	156.935	171.114	118.378	163.861	193.854	119.13	92.2035	175.374	119.836	125.507	192.395	163.356	200.994	233.927	109.023	85.4733	80.1586
ENSMUSG00000007041	Clic1	1308.97	1260.99	880.416	1207.45	1101.49	655.261	873.278	1047.55	855.835	2274.92	1318.67	769.273	1722.29	1096.3	858.917	2085.1	1494.65	754.667	1547.17	1472.71	659.151	1774.14	1068.77	642.798	2192.79	2043.67	915.036
ENSMUSG00000007050	Lsm2	125.928	129.035	104.531	113.262	101.642	91.5433	140.075	116.872	112.282	205.927	130.186	110.282	153.442	143.118	117.88	136.069	183.752	89.6382	87.3197	203.102	102.444	131.311	111.688	92.5602	140.914	244.005	185.214
ENSMUSG00000007080	Pole	158.65	256.417	112.037	65.9562	104.381	96.3941	61.3605	98.8512	73.334	315.6	318.81	119.909	264.675	330.624	136.148	97.4319	76.3221	62.894	131.338	108.582	100.436	112.488	127.88	85.6929	129.176	145.624	76.8094
ENSMUSG00000007097	Atp1a2	96.1784	17.4019	370.383	86.9651	52.5847	555.306	100.292	57.2881	195.447	27.4083	19.3652	195.604	49.587	32.6455	251.461	30.6875	22.2966	230.448	20.1755	19.217	222.297	21.9819	18.2464	125.051	44.33	23.8208	219.35
ENSMUSG00000007107	Atp1a4	20.0331	15.7325	20.6831	17.9706	19.5784	18.5479	21.2029	25.3362	13.9743	16.7707	24.0262	20.3245	20.2925	18.0487	17.1389	23.0791	18.432	17.377	13.7122	17.6362	13.6175	9.93761	19.5543	16.3947	22.0715	15.5452	17.5405
ENSMUSG00000007122	Casq1	38.6902	48.8015	33.6919	36.9521	35.3963	19.6446	16.1572	42.2087	9.93761	29.5224	45.2297	41.9384	37.3069	37.9269	47.0246	42.8238	44.0575	23.6643	53.3509	37.3982	29.4496	19.1059	40.1147	38.5034	37.2349	22.5819	30.9665
ENSMUSG00000007207	Stx1a	60.991	48.8015	69.6309	62.2769	41.2157	57.3239	50.2302	35.8371	55.4072	50.3963	30.3951	40.8118	62.6845	36.6188	70.9302	63.2101	40.9515	53.8725	56.5734	45.7202	56.9235	40.5366	44.1218	58.8889	85.4256	69.0151	41.6722
ENSMUSG00000007216	Zfp775	30.927	18.9262	45.6237	36.9521	20.4782	58.1477	40.1607	24.323	59.0144	42.6143	20.5854	29.2373	47.3807	19.73	40.6432	24.2152	17.0031	27.421	26.5451	20.707	41.3537	40.5366	23.1823	51	53.0339	19.9927	19.0982
ENSMUSG00000007279	Scube2	18.65	20.3612	35.7191	22.7079	24.6922	31.9757	17.9712	20.056	31.9425	15.2595	15.2244	28.0302	20.2925	16.2148	22.5575	9.93761	19.7744	35.3987	22.8209	17.6362	51.779	28.5101	16.853	41.2154	28.025	28.5536	66.7288
ENSMUSG00000007338	Mrpl49	236.184	204.023	180.293	143.97	198.419	161.56	166.523	184.395	187.262	208.718	219.534	170.049	231.862	212.601	173.623	223.341	192.585	200.925	265.752	244.632	181.425	260.371	197.201	181.245	149.291	223.74	164.275
ENSMUSG00000007379	Dennd2c	873.444	245.728	370.383	474.803	202.498	388.952	342.798	166.47	326.25	837.342	270.104	975.26	530.113	196.768	548.203	463.958	205.339	585.031	534.006	213.207	519.889	318.734	160.196	380.746	643.426	200.426	1619.21
ENSMUSG00000007411	Mark3	1149.21	1717.79	837.61	902.208	2063.88	972.678	843.347	1124.12	771.865	1383.99	1732.67	1175.93	1070.22	1683.19	1037.46	1082.35	2238.45	1098.68	1006.85	2424.91	1014.22	895.274	1377.15	786.091	1410.63	2543.32	1602.74
ENSMUSG00000007415	Gatad1	449.04	431.6	443	453.248	424.52	581.695	594.306	542.083	698.389	658.202	552.095	525.033	487.826	588.342	435.192	596.827	528.591	441.655	409.267	559.636	482.085	636.756	485.048	502.881	464.928	589.135	451.363
ENSMUSG00000007440	Pcdha11	146.388	43.2031	62.0132	2553.15	252.102	255.316	3803.81	637.4	658.734	107.115	40.3776	120.977	46.2741	22.842	65.7782	219.592	37.8155	66.9708	106.223	32.5214	61.0177	302.219	62.7583	72.7724	83.7345	21.3093	47.4533
ENSMUSG00000007458	M6pr	848.003	1247.12	976.261	1305.31	1516.57	1465.95	1265.95	1520.62	1491.39	1175.17	1471.05	1444.54	908.517	1193.51	1064.69	1136.61	1772.6	1090.72	1039.06	1858.07	1180.3	1414.46	1484.99	1109.96	890.283	2070.98	1267.68
ENSMUSG00000007476	Lrrc8a	945.695	950.403	1430.35	1002.76	1089.29	1427.58	933.139	1031.38	1294.32	495.75	612.696	1132.4	608.338	916.46	1410.67	946.712	1108.05	1374.99	626.506	1107.5	1434.9	739.067	887.142	1177.78	1190.49	1279.01	1286.36
ENSMUSG00000007480	Mc5r	20.0331	51.0241	19.45	16.6298	49.0588	17.3959	16.1572	26.3348	9.93761	16.7707	56.6861	32.788	20.2925	57.0244	26.1906	16.8046	76.3221	29.2372	22.8209	60.8191	22.4343	17.5467	35.0277	14.9767	14.9269	40.7121	27.2339
ENSMUSG00000007564	Ppp2r1a	1758.73	1773.29	1747.64	1898.72	1847.54	1963.21	2057.25	2253.18	2208.55	2463.31	2146.67	2050.77	1857.56	2155.85	1822.19	2259.08	1782.38	1529.47	1756.02	2511.16	1760.09	2340.59	1901.19	1614.38	1892.6	1929.38	1753.24
ENSMUSG00000007570	Fance	103.372	127.962	145.737	84.2352	112.588	174.396	132.854	164.762	190.77	102.433	142.183	161.525	97.0593	184.584	156.414	72.769	86.2577	133.795	109.367	109.711	159.472	124.672	141.195	172.741	59.9185	61.7673	100.178
ENSMUSG00000007589	Tinf2	125.928	157.991	215.739	136.752	222.888	208.864	135.262	156.222	154.501	97.7465	163.386	136.998	120.506	183.366	171.599	90.8104	187.678	225.662	83.1063	203.102	194.389	96.9485	192.459	165.085	75.2635	163.905	146.626
ENSMUSG00000007591	Tssk4	18.65	15.7325	9.93761	21.5836	18.6488	19.6446	22.7089	17.6985	16.057	15.2595	18.0868	21.6926	15.6976	21.3178	23.7935	21.9168	24.682	19.6189	20.1755	22.1349	18.5208	9.93761	24.329	18.8843	28.025	22.5819	20.5657
ENSMUSG00000007594	Hapln4	22.6347	18.9262	19.45	15.1536	19.5784	17.3959	14.0368	16.4093	21.0038	15.2595	25.1237	18.8954	22.9741	25.7621	25.0028	18.1865	21.0573	19.6189	25.3272	22.1349	27.1808	21.9819	13.5127	14.9767	35.4323	36.3774	21.9714
ENSMUSG00000007603	Dus3l	197.437	273.517	240.909	214.216	218.131	221.682	250.517	226.183	234.011	226.387	217.694	221.142	220.215	284.405	239.338	169.887	174.917	236.032	191.838	214.329	238.238	229.523	238.908	232.228	145.941	146.64	141.108
ENSMUSG00000007610	Gtpbp3	98.2348	113.993	124.219	84.2352	71.3905	118.167	119.604	116.015	107.579	98.6841	94.0959	95.2776	123.698	108.88	104.663	72.769	69.3412	71.0363	90.4762	68.8499	90.3823	142.369	107.873	127.61	66.758	87.5232	55.4426
ENSMUSG00000007613	Tgfbr1	677.034	1290.88	1001.39	998.273	1824.48	1711.38	657.767	1090.09	1311.81	650.776	1782.24	2534.89	441.306	1418.31	1443.95	752.131	2457.67	2156.92	746.019	2549.25	1972.91	290.107	1057.42	1317.66	780.201	2250.01	3669.03
ENSMUSG00000007617	Homer1	843.932	922.651	740.829	501.745	1151.01	850.353	209.74	429.73	279.556	559.806	895.47	1709.97	637.936	1005.17	1318.88	774.583	1513.24	2219.02	877.995	1399.89	1587.05	266.98	664.821	814.918	1203.83	2064.91	3784.37
ENSMUSG00000007646	Rad51c	36.5022	34.0508	38.725	20.4268	25.4965	42.3238	41.4333	26.3348	37.0317	29.5224	34.4492	31.6146	29.1712	37.9269	31.9094	21.9168	18.432	30.1339	22.8209	15.9075	34.9495	41.7047	32.959	41.2154	14.9269	27.3961	29.736
ENSMUSG00000007653	Gabrb2	15.5658	9.93761	20.6831	13.4068	9.93761	13.1841	14.0368	9.93761	9.93761	9.93761	9.93761	13.7596	13.7495	9.93761	19.974	13.4898	13.5837	18.5256	9.93761	9.93761	17.0748	9.93761	9.93761	14.9767	9.93761	9.93761	17.5405
ENSMUSG00000007655	Cav1	1740.41	255.348	4110.04	2095.32	653.151	3478.92	1892.05	843.331	3669.66	474.396	194.693	2141.01	581.912	384.127	3013.37	2202.02	164.115	2575.74	2371.14	199.733	3013.11	1047.07	201.942	3304.77	1233.85	497.065	3777.78
ENSMUSG00000007656	Arpp19	433.77	428.397	442.069	455.942	445.555	779.194	432.638	461.226	666.898	723.177	616.369	709.81	465.624	516.632	519.952	507.003	622.57	463.163	468.522	617.903	634.284	555.342	434.892	574.114	590.047	936.113	896.36
ENSMUSG00000007659	Bcl2l1	312.599	488.19	382.487	958.77	579.887	417.748	925.956	721.647	496.601	441.9	324.323	268.996	350.365	420.601	299.937	1217.05	587.329	343.654	845.781	391.53	330.837	867.773	600.485	381.594	965.336	478.852	239.16
ENSMUSG00000007670	Khsrp	887.691	1036.86	859.013	957.872	1187.63	1367.62	1450.31	1270.47	1307.15	1344.08	1256.25	1171.68	1055.42	1243.33	1104.03	915.842	945.581	1019.85	726.274	1209.45	1145.5	1258.27	1117.96	1049.76	901.958	1292.16	986.446
ENSMUSG00000007682	Dio2	332.968	110.766	275.386	50.2263	33.1749	107.693	52.7171	36.7568	75.7084	646.135	145.872	551.584	231.862	103.978	365.556	33.789	50.2038	329.31	24.0875	64.2668	248.199	33.4184	37.0752	111.39	176.074	100.82	1425.87
ENSMUSG00000007721	Ccdc124	203.557	133.329	209.212	141.264	119.42	164.77	178.533	171.593	207.136	372.257	172.597	189.218	370.459	166.3	178.682	221.467	122.809	124.183	211.628	155.906	149.486	350.659	152.598	161.682	209.517	180.142	115.689
ENSMUSG00000007739	Cct4	1848.27	2239.69	1643.42	1682.36	1861.1	1803.32	1446.72	2267.64	1749.11	2947.74	2958.13	2257.79	2026.65	2229.97	1764.7	2384.42	2196.37	1698.27	2170.6	2745.29	1873.46	2525.38	2107.4	1577.08	2146.09	2962.05	3052.77
ENSMUSG00000007777	0610009B22Rik	84.8488	68.5957	57.2278	76.0293	49.0588	89.9251	122.014	75.5719	83.9997	195.694	96.8799	75.9033	133.266	58.2766	67.841	79.4303	49.1844	61.2597	96.7815	61.9694	56.9235	199.762	76.2797	73.6361	63.343	55.5189	58.841
ENSMUSG00000007783	Cpt1c	72.4394	43.2031	120.473	86.0554	49.7656	144.701	132.854	45.7951	108.755	56.1657	32.4353	97.4238	61.5999	54.5146	143.244	79.4303	49.1844	113.759	87.3197	36.1898	138.495	124.672	45.1171	119.077	54.7603	23.8208	63.3545
ENSMUSG00000007805	Twist2	37.5986	17.4019	66.779	57.6615	25.4965	42.3238	56.4317	21.1647	54.2015	16.7707	18.0868	24.3053	33.8677	25.7621	55.4113	26.4273	17.0031	61.2597	18.7699	13.8809	49.7107	19.1059	9.93761	32.9883	159.339	15.5452	177.501
ENSMUSG00000007812	Zfp655	1666.13	2053.98	1273.09	2377.2	2581.35	1334.84	1423.98	1593.79	974.788	1852.66	2473.46	2179.23	1858.62	2257.92	1699.14	2627.62	3415.79	2472.23	2943.65	3009.66	1886.39	1506.86	2054.43	1187.11	2751.47	2823.49	2944.02
ENSMUSG00000007815	Rhoa	3888.38	2867.23	3506.19	4031.69	3275.82	3465.33	4220.39	3969.26	4299.34	6470.52	4228.56	3653.88	4234.28	3232.39	3239.3	4516.13	3149.59	2995.36	3864.23	3922.63	3243.82	4686.67	2934.12	2906.34	5276.32	4901.96	4562.11
ENSMUSG00000007817	Zmiz1	6250.01	5195.96	4177.97	4218.41	5612.87	6907.63	4109.07	4468.68	6147.58	7626.83	6409.57	5521.34	5551.04	5997.81	5408.82	9553.99	5853.64	6040.97	7356.39	8098.75	6523.5	9993.63	4525.11	5354.58	3028.3	5325.75	3042.89
ENSMUSG00000007827	Ankrd26	119.783	136.548	182.159	155.692	150.789	392.951	183.336	200.603	294.734	124.879	182.726	223.27	115.185	126.014	187.786	73.7219	96.1622	204.117	70.424	109.711	226.283	103.613	172.537	214.391	44.33	91.6193	148.833
ENSMUSG00000007833	Aldh16a1	249.434	274.585	255.82	228.608	248.705	251.313	321.231	327.563	286.562	289.588	256.316	217.951	294.302	365.889	231.255	251.452	196.51	192.144	270.954	272.678	230.268	338.55	274.905	226.283	236.253	180.142	100.178
ENSMUSG00000007836	Hnrnpa0	1508.41	1497.93	1522.46	1633.88	1776.32	2067.93	2012.96	1953.69	2011.48	2183.04	1955.74	2168.61	1584.9	2093.89	1786.89	1677.27	1760.85	1573.26	1351.83	2623.18	1982.85	1999.62	1642.96	1632.18	1597.42	2185.27	2058.62
ENSMUSG00000007837	Prrg2	151.498	108.614	109.223	123.207	100.958	117.362	173.73	135.707	141.616	152.864	140.338	127.388	149.197	143.118	149.324	124.779	94.1834	101.712	143.871	125.507	121.49	222.911	119.312	154.873	98.9246	82.3959	72.336
ENSMUSG00000007850	Hnrnph1	4182.44	5759.46	4745.53	3906.9	9118.42	5423.91	3025.7	3828.87	2652.83	4621.9	5744.07	5516.03	3771.41	5067.09	6189.48	3647.17	8433.39	9017.29	4278.8	6763.47	7240.5	2522.08	6799.03	6464.25	5309.67	10601.3	9093.39
ENSMUSG00000007867	Ift43	429.698	371.798	195.222	421.812	358.015	221.682	447.011	501.23	298.236	607.148	501.591	276.438	434.962	346.433	219.128	607.119	278.866	140.198	545.439	341.083	217.315	637.856	388.517	203.345	321.414	223.74	115.689
ENSMUSG00000007872	Id3	693.317	205.093	979.984	431.692	148.064	527.317	555.988	240.673	574.755	544.953	105.222	518.661	1085.02	132.126	755.016	341.35	62.3304	857.396	304.243	76.8405	1100.74	1369.36	182.974	831.875	788.541	89.5719	282.064
ENSMUSG00000007877	Tcap	13.6667	17.4019	9.93761	9.93761	15.565	9.93761	14.0368	16.4093	9.93761	13.4737	13.4515	13.7596	17.3553	9.93761	9.93761	20.7215	9.93761	9.93761	17.2759	9.93761	9.93761	13.8391	9.93761	14.9767	9.93761	9.93761	9.93761
ENSMUSG00000007880	Arid1a	2010.05	2186.32	2144.01	2563.03	2729.2	3215.11	3352.51	2892.14	2845.24	2335.24	2606.56	2533.83	2431.4	2748.8	2896.37	1657.63	1802.94	2677.66	1543.02	2421.55	2875.88	3125.92	2876.42	2611.33	2327.87	2320.81	1956.46
ENSMUSG00000007888	Crlf1	22.6347	21.735	89.4847	21.5836	19.5784	156.745	19.6336	28.2963	80.4496	15.2595	20.5854	104.928	17.3553	18.0487	133.105	19.4833	17.0031	106.534	18.7699	20.707	98.4272	17.5467	19.5543	73.6361	22.0715	19.9927	144.419
ENSMUSG00000007891	Ctsd	5399.37	3874.71	3958.38	3127.69	3212.07	2239.81	2957.47	4974.06	3245.21	5693.76	4157.88	3395.9	5061.75	4193.48	3316.97	5979.04	2524.22	2477.01	5458.1	3485.75	2798.31	7495.79	3337.07	2437.54	6495.38	2836.64	2418.94
ENSMUSG00000007892	Rplp1	2344.82	3356.03	2570.16	4044.25	3311.09	2458.85	6072.28	5068.49	5283.51	3720.79	5453.08	3140.04	3513.56	4708.66	2709.78	3114.01	4094.98	1928.39	2865.72	5779.93	2562.62	3753.96	3755.16	2067.93	2749.8	3410.12	3049.48
ENSMUSG00000007908	Hmgcll1	17.1791	21.735	26.3642	17.9706	28.6336	115.751	16.1572	37.673	81.6335	13.4737	16.7239	40.8118	9.93761	27.1766	30.788	9.93761	18.432	44.7398	13.7122	22.1349	46.5945	9.93761	27.6548	40.3141	9.93761	17.1517	24.6581
ENSMUSG00000007944	Ttc9b	13.6667	23.0641	26.3642	24.8835	22.2108	21.7248	25.5931	18.9056	21.0038	19.4336	19.3652	20.3245	20.2925	9.93761	18.6002	16.8046	18.432	25.5674	18.7699	17.6362	21.1789	9.93761	19.5543	20.0315	22.0715	21.3093	29.736
ENSMUSG00000007946	Phox2a	90.0029	47.687	50.4843	86.9651	43.3692	52.3642	69.9375	50.2399	50.5725	104.306	46.1931	28.0302	91.7162	33.9793	40.6432	147.349	31.4111	48.078	104.127	37.3982	56.9235	166.667	46.1101	58.016	73.5656	27.3961	38.1585
ENSMUSG00000007950	Abhd8	98.2348	47.687	115.788	50.2263	50.4715	125.41	73.5989	70.3706	129.892	67.5993	38.417	100.641	74.56	43.0995	107.715	58.4048	28.1053	70.224	54.4265	31.2807	108.464	101.393	52.0291	106.261	49.5684	23.8208	54.3069
ENSMUSG00000007987	Ift22	101.318	80.549	83.8276	126.821	60.9816	132.648	147.292	111.728	170.887	112.729	75.4784	79.1415	118.378	88.0099	99.5716	117.246	50.2038	65.3415	89.4244	56.205	78.2801	152.313	100.236	89.1282	73.5656	78.2874	41.6722
ENSMUSG00000007989	Fzd3	83.8169	122.592	257.683	165.604	141.25	774.397	214.538	143.403	647.07	52.3245	177.202	608.93	56.1608	157.763	365.556	120.072	130.687	524.498	99.9307	181.761	736.733	172.186	137.392	650.429	71.8662	151.72	507.41
ENSMUSG00000008028	1700008O03Rik	15.5658	13.7713	13.479	16.6298	17.6806	17.3959	21.2029	17.6985	16.057	9.93761	19.3652	18.8954	13.7495	14.0727	22.5575	18.1865	17.0031	16.1484	13.7122	9.93761	22.4343	17.5467	15.3213	17.6805	17.5991	13.6537	13.8362
ENSMUSG00000008035	Mid1ip1	124.904	93.5259	272.591	263.676	134.432	398.551	384.727	228.74	378.765	148.203	61.4098	189.218	178.897	83.0832	213.063	118.188	73.3334	231.246	115.65	98.4059	216.318	350.659	133.588	276.378	107.341	198.398	205.038
ENSMUSG00000008036	Ap2s1	319.729	246.797	300.538	236.702	150.107	208.063	388.321	270.496	383.433	450.257	232.41	221.142	375.747	233.297	244.389	301.091	150.359	147.399	244.94	187.378	194.389	378.177	192.459	217.789	256.298	226.78	142.212
ENSMUSG00000008090	Fgfrl1	98.2348	194.394	304.264	130.433	249.385	773.597	153.304	307.975	787.026	105.243	233.33	803.251	111.99	267.372	596.63	125.721	179.826	401.821	97.8314	243.51	585.543	131.311	303.316	488.464	115.746	174.055	320.553
ENSMUSG00000008129	4930432K21Rik	15.5658	34.0508	20.6831	20.4268	27.8596	19.6446	25.5931	24.323	21.0038	24.1357	27.2688	18.8954	20.2925	29.9424	23.7935	16.8046	23.5026	23.6643	21.5204	31.2807	18.5208	17.5467	26.562	34.8431	22.0715	19.9927	15.836
ENSMUSG00000008136	Fhl2	681.105	259.623	334.067	380.492	338.331	247.31	178.533	219.363	244.524	444.686	248.961	528.219	399.011	271.022	380.695	566.887	957.327	434.485	412.386	540.586	377.612	75.7658	160.196	237.324	865.264	745.94	764.522
ENSMUSG00000008140	Emc10	412.39	501.002	557.49	558.32	457.09	733.619	776.301	708.883	984.118	477.181	556.687	665.211	432.847	649.109	570.399	518.231	394.451	467.943	416.544	583.167	615.385	600.45	479.37	549.522	438.232	429.269	533.783
ENSMUSG00000008153	Clstn3	15.5658	13.7713	32.6698	17.9706	16.6604	36.344	16.1572	13.3017	60.2138	9.93761	9.93761	35.1106	18.8684	16.2148	33.0223	13.4898	17.0031	39.681	13.7122	9.93761	38.1713	13.8391	16.853	40.3141	9.93761	9.93761	33.3954
ENSMUSG00000008167	Fbxw9	247.396	302.367	195.222	238.501	209.975	185.622	328.42	221.068	245.692	272.862	217.694	217.951	248.799	283.188	229.234	298.281	263.186	180.166	306.323	239.021	192.395	294.511	242.698	196.547	353.127	220.7	138.9
ENSMUSG00000008193	Spib	63.0796	23.0641	105.469	19.2276	21.3542	9.93761	17.9712	29.2623	22.4783	13.4737	15.2244	15.7139	22.9741	14.0727	28.5152	13.4898	13.5837	18.5256	13.7122	17.6362	17.0748	13.8391	18.2464	29.2102	19.9208	13.6537	39.3343
ENSMUSG00000008200	Fnbp4	909.061	1143.59	936.248	1046.75	1448.75	799.183	948.703	827.164	564.257	777.94	1121.3	1122.84	971.931	1223.89	1199.86	646.414	1503.46	1554.15	747.058	1310.27	1145.5	761.068	1270.26	1007.37	873.604	1894.99	1684.03
ENSMUSG00000008206	Cers4	133.093	45.4506	307.058	103.303	70.0068	301.742	88.1858	102.288	288.896	27.4083	36.4418	226.461	41.8196	43.0995	211.042	31.7284	29.2178	212.896	42.4874	30.0289	241.226	55.4917	47.101	300.991	39.0242	25.0329	105.722
ENSMUSG00000008226	Scrn3	109.531	63.135	76.2673	98.7709	49.0588	90.7343	85.76	70.3706	69.767	166.838	71.7385	82.3755	118.378	46.9317	71.9587	89.8636	24.682	56.3415	89.4244	43.3624	62.0388	154.522	64.6972	84.8335	88.8049	38.5534	39.3343
ENSMUSG00000008301	Phax	184.174	164.419	200.818	195.319	201.818	264.123	221.736	288.385	312.243	280.296	308.703	305.136	195.853	206.512	236.307	202.719	206.32	207.31	165.782	278.287	262.142	271.385	229.432	259.4	197.816	338.18	370.026
ENSMUSG00000008305	Tle1	320.747	576.802	530.498	331.978	655.864	919.911	390.716	534.424	655.235	502.248	742.153	1348.99	348.25	582.265	827.646	244.894	524.675	1136.9	248.062	569.721	1111.68	315.431	480.316	759.808	408.198	653.883	1316.02
ENSMUSG00000008307	1700109H08Rik	232.107	230.76	130.772	144.872	207.936	93.1609	88.1858	133.14	49.3584	121.142	194.693	194.54	170.415	196.768	117.88	230.839	437.537	160.192	339.603	180.637	125.493	78.003	192.459	119.931	219.545	201.44	171.991
ENSMUSG00000008318	Relt	57.8506	105.384	111.099	46.4769	122.834	93.1609	38.8828	65.1534	62.6087	29.5224	97.8075	126.32	61.5999	127.237	121.943	41.8339	155.273	167.384	38.061	130.016	114.479	28.5101	83.0058	90.8446	51.3035	91.6193	134.482
ENSMUSG00000008333	Snrpb2	243.319	200.814	194.289	252.887	221.529	207.262	208.54	245.786	229.338	466.969	374.85	230.716	298.534	215.036	170.587	304.836	259.266	183.36	275.116	301.839	212.332	301.118	201.942	163.384	202.831	375.631	337.046
ENSMUSG00000008348	Ubc	1661.04	1456.31	1515.02	2019.01	1899.08	1983.99	1523.34	1791.18	2164.24	1931.54	2154.02	1739.69	1600.75	1825.36	1626.52	1374.2	1225.5	1360.66	1243.76	1635.14	1626.83	1457.36	1339.31	1258.32	945.322	887.56	1167.71
ENSMUSG00000008373	Prpf31	244.338	245.728	190.557	219.613	169.851	201.652	239.725	214.247	250.363	470.682	271.024	195.604	411.7	236.949	198.91	287.981	214.167	190.547	242.858	197.487	230.268	375.976	226.589	196.547	234.582	266.29	231.457
ENSMUSG00000008384	Sertad1	454.13	807.374	645.905	613.096	883.774	885.532	582.332	1022.02	954.963	590.439	1428.83	1184.42	468.795	1057.42	807.471	532.267	760.59	788.114	565.187	1416.7	893.878	296.714	788.756	517.298	409.867	526.408	620.59
ENSMUSG00000008393	Carhsp1	460.238	467.904	617.985	458.637	586.671	927.106	474.556	573.573	1114.73	638.709	800.91	893.504	608.338	678.276	810.498	567.822	789.954	857.396	491.39	1059.33	991.344	451.912	593.862	730.98	1027.05	1149.54	1021.6
ENSMUSG00000008398	Elk3	565.08	224.345	956.72	425.405	231.042	568.101	311.645	253.455	608.58	285.871	149.561	503.792	340.846	187.021	719.708	205.531	210.244	575.474	173.08	139.026	566.643	266.98	179.179	758.112	177.747	105.925	279.864
ENSMUSG00000008429	Herpud2	755.396	716.644	738.037	854.623	831.546	936.7	730.804	771.853	783.528	934.796	977.175	978.446	653.791	841.118	789.314	1210.51	899.579	937.029	1133.62	1040.28	918.742	852.373	725.371	686.89	1435.65	1264.85	1649.97
ENSMUSG00000008435	Rdh13	174.988	164.419	178.426	183.617	180.737	270.527	190.539	133.14	202.461	235.685	143.106	267.933	206.447	146.781	220.138	183.962	193.566	300.617	213.71	180.637	265.13	314.33	190.562	263.645	358.134	239.953	515.102
ENSMUSG00000008438	Adam21	20.0331	29.3131	15.2679	17.9706	18.6488	14.8024	16.1572	16.4093	9.93761	13.4737	20.5854	13.7596	18.8684	19.73	15.5357	18.1865	29.2178	18.5256	21.5204	20.707	13.6175	17.5467	18.2464	20.0315	17.5991	19.9927	17.5405
ENSMUSG00000008450	Nutf2	34.2929	42.0745	48.5453	92.4183	92.0465	110.112	129.242	96.2721	114.632	176.15	132.956	95.2776	158.748	129.681	96.5144	104.044	131.671	99.3001	93.63	123.253	88.3685	142.369	101.191	95.9892	130.854	186.229	189.62
ENSMUSG00000008461	Fut1	9.93761	15.7325	15.2679	9.93761	12.8948	9.93761	14.0368	17.6985	13.9743	9.93761	9.93761	9.93761	13.7495	14.0727	9.93761	9.93761	15.4339	14.7908	9.93761	13.8809	13.6175	9.93761	13.5127	16.3947	9.93761	9.93761	17.5405
ENSMUSG00000008475	Arpc5	1407.67	1306.89	1206.1	1186.81	1164.57	834.362	875.672	1199	851.17	1848.95	1559.18	1116.47	1347.12	1321.1	1028.38	1726.85	1575.88	1025.42	1455.74	1706.84	1038.09	1320.97	1239.99	907.332	2009.34	2212.58	1485.19
ENSMUSG00000008482	Rnf151	20.0331	15.7325	13.479	16.6298	16.6604	13.1841	14.0368	13.3017	9.93761	15.2595	15.2244	15.7139	21.6556	22.842	19.974	13.4898	13.5837	14.7908	15.6382	20.707	17.0748	13.8391	15.3213	14.9767	14.9269	25.0329	19.0982
ENSMUSG00000008489	Elavl2	15.5658	13.7713	13.479	16.6298	9.93761	9.93761	14.0368	13.3017	13.9743	20.6643	9.93761	15.7139	20.2925	14.0727	13.6478	16.8046	9.93761	13.1767	18.7699	9.93761	15.4877	17.5467	9.93761	13.2947	24.119	9.93761	9.93761
ENSMUSG00000008496	Pou2f2	81.7522	53.2391	110.161	40.7947	39.7724	25.6124	17.9712	44.9014	25.3005	20.6643	34.4492	46.412	46.2741	44.3807	60.6071	26.4273	50.2038	71.8483	28.9298	40.9902	39.2359	24.6715	42.1239	47.4649	44.33	61.7673	52.0303
ENSMUSG00000008540	Mgst1	1172.62	2991.03	1037.68	715.457	1978.43	958.287	678.122	2706.66	1340.96	1126.91	5043.68	1665.38	623.137	3651.57	1244.24	312.327	2134.71	835.895	265.752	2986.13	1078.86	436.506	2834.8	739.459	299.713	1690.68	827.146
ENSMUSG00000008575	Nfib	3781.54	7333.64	4739.95	5728.35	9228.97	9959.01	5253.48	10323	8583.51	4479.91	11425.1	10274.4	2978.82	9059.69	7223.3	2939.1	4684.14	6021.86	2475.04	7865.75	8902.21	3636.27	10099.2	7556.97	2189.46	4335.57	6383.41
ENSMUSG00000008601	Rab25	238.223	372.866	80.9951	281.654	282.662	68.8031	511.681	461.226	163.866	478.11	398.732	88.8325	349.307	370.753	103.645	373.177	217.109	57.9837	333.364	373.594	62.0388	603.751	416.911	89.1282	304.721	218.673	36.9773
ENSMUSG00000008604	Ubqln4	327.876	459.362	323.823	349.049	529.685	421.748	492.52	512.295	449.937	433.544	506.183	345.516	403.241	609.003	421.064	316.072	669.557	537.242	293.841	638.071	430.35	472.819	573.047	421.462	401.523	857.213	798.581
ENSMUSG00000008658	Rbfox1	9.93761	20.3612	24.1619	15.1536	12.8948	31.9757	14.0368	25.3362	9.93761	9.93761	15.2244	13.7596	13.7495	9.93761	15.5357	9.93761	13.5837	18.5256	9.93761	9.93761	9.93761	9.93761	13.5127	17.6805	9.93761	15.5452	19.0982
ENSMUSG00000008668	Rps18	114.659	157.991	116.725	1090.74	1110.31	903.921	1236.03	1472.12	1603.34	1597.45	1997.96	1377.66	1460.2	1651.6	1117.15	1104.8	1448.65	860.582	1129.46	1896.16	1026.15	1471.66	1209.72	846.289	943.654	1275.98	1189.68
ENSMUSG00000008682	Rpl10	377.773	647.258	420.658	4409.62	6090.31	4526.16	4557.97	7479.66	6174.4	6995.78	8720	5915.21	5815.23	7527.54	5413.86	5393.5	6795.11	4250.23	4988.46	8999.4	5029.85	6517.99	6623.1	4296.62	5966.73	6958.18	5346.43
ENSMUSG00000008683	Rps15a	891.761	1339.97	875.763	1901.41	2074.06	1708.18	1650.23	2320.39	2442.94	3073.95	3783.36	2883.12	2404.98	3219.02	2324.49	1988.76	3140.78	1826.47	2019.94	3346.84	2248.37	2236.1	2152.8	1678.81	2116.08	2722.34	2686.97
ENSMUSG00000008690	Ncaph2	624.111	761.476	552.836	623.871	583.958	544.111	694.884	776.108	668.064	941.293	871.6	647.159	851.444	831.397	590.577	698.805	668.578	471.129	637.938	822.939	548.738	879.874	736.723	513.906	578.37	719.639	541.475
ENSMUSG00000008730	Hipk1	4121.39	4873.65	3656.92	5539.83	7791.89	4040.92	4343.69	5262.48	3362.98	4739.76	5912.05	3731.38	3439.58	5940.7	4176.3	6792.8	6405.6	4723.99	5712.66	7880.31	4347.66	4232.41	5161.7	3197.11	6570.43	11685.5	6618.49
ENSMUSG00000008734	Gprc5b	169.884	167.632	686.853	214.216	304.389	1569.08	209.74	435.689	1620.83	47.4924	219.534	1104.79	100.262	307.516	849.839	48.7149	70.3401	801.652	33.5566	159.28	1398.1	46.3412	334.56	1368.53	112.385	60.7285	376.622
ENSMUSG00000008763	Man1a2	1162.44	1351.71	1070.24	1543.21	1328.02	2099.11	1690.94	1446.6	1880.88	1674.47	1636.29	1931.86	1259.4	1459.62	1488.33	1836.29	1523.03	1566.89	1610.56	1582.49	1803.85	2114.01	1355.39	1587.25	1680.81	2054.8	2231.09
ENSMUSG00000008822	Acyp1	37.5986	46.5701	41.6982	40.7947	30.1651	43.1689	40.1607	52.0083	50.5725	49.43	51.9372	61.8051	51.7851	33.9793	38.4901	37.8435	26.9801	31.0242	42.4874	33.7523	37.1023	73.5264	44.1218	38.5034	31.7763	23.8208	25.957
ENSMUSG00000008843	Cldn13	13.6667	13.7713	15.2679	13.4068	9.93761	9.93761	14.0368	17.6985	9.93761	9.93761	9.93761	13.7596	21.6556	14.0727	9.93761	15.2849	13.5837	14.7908	15.6382	9.93761	9.93761	15.8406	16.853	13.2947	9.93761	13.6537	9.93761
ENSMUSG00000008845	Cd163	387.955	102.153	513.744	107.832	124.199	36.344	25.5931	215.1	38.2851	101.496	89.4518	41.9384	508.97	146.781	181.717	45.7788	54.2657	338.873	36.9435	82.5301	151.484	104.723	159.246	145.507	73.5656	34.18	59.9711
ENSMUSG00000008855	Hdac5	730.972	980.289	834.818	1016.23	967.879	800.782	1177.36	1247.5	879.159	625.714	816.517	749.098	719.325	951.7	896.24	860.649	552.086	792.096	861.368	755.717	738.722	845.773	1057.42	785.243	846.918	402.957	588.725
ENSMUSG00000008859	Rala	427.661	347.233	312.646	381.391	284.02	376.952	371.55	301.162	400.935	790.006	508.019	361.454	457.165	334.273	295.899	677.287	410.119	284.674	596.367	399.376	309.933	587.248	270.17	296.748	905.293	771.23	530.487
ENSMUSG00000008892	Vdac3	227.01	231.83	219.469	352.643	369.553	420.948	364.362	399.084	482.602	633.14	541.077	381.64	418.044	431.542	282.771	448.985	520.759	314.167	396.791	529.38	366.666	484.923	380.945	347.66	508.305	804.612	461.254
ENSMUSG00000008932	Slc1a7	15.5658	13.7713	19.45	13.4068	15.565	14.8024	9.93761	13.3017	13.9743	9.93761	9.93761	15.7139	13.7495	14.0727	13.6478	9.93761	9.93761	13.1767	17.2759	13.8809	13.6175	9.93761	9.93761	9.93761	17.5991	9.93761	17.5405
ENSMUSG00000008958	Vps72	240.261	223.275	194.289	223.211	174.614	230.493	296.066	233.854	251.531	267.287	235.169	175.375	224.45	179.71	206.998	266.44	181.789	132.994	284.479	185.132	185.414	264.777	232.275	208.444	244.606	172.025	121.22
ENSMUSG00000008976	Gabpa	712.654	743.33	807.832	728.925	720.305	1198.13	558.383	809.294	1073.91	983.058	1034.09	1000.74	622.08	820.46	765.103	827.907	808.552	886.064	754.333	980.907	997.312	637.856	766.051	845.441	1165.47	1096.94	1288.55
ENSMUSG00000008999	Bmp7	51.5365	25.6267	242.773	33.0454	27.8596	447.342	42.7011	44.0058	423.103	48.462	31.4189	887.133	29.1712	22.842	511.88	26.4273	18.432	397.837	17.2759	19.217	615.385	32.2074	22.0094	510.513	37.2349	19.9927	568.946
ENSMUSG00000009013	Dynll1	1004.72	681.418	1011.62	856.419	518.152	1140.57	973.844	612.721	1241.84	1835.03	1063.47	1496.57	1464.42	751.192	1161.53	987.873	622.57	1148.85	1020.36	764.68	1250.91	1417.76	509.651	1065.87	1365.6	1390.27	1896.04
ENSMUSG00000009030	Pdcl	310.562	299.161	331.273	226.809	257.535	436.945	225.334	313.085	392.767	487.394	443.736	446.438	342.961	342.785	316.092	386.281	299.442	340.467	361.44	440.847	472.137	374.875	319.412	350.205	406.529	365.51	462.353
ENSMUSG00000009035	Tmem184b	520.295	428.397	790.151	571.79	444.198	644.866	587.121	425.474	627.242	383.401	327.998	464.495	447.65	461.933	758.042	510.746	391.513	639.189	494.508	424.035	609.417	442.008	397.982	691.977	601.724	631.626	466.749
ENSMUSG00000009070	Rsph14	13.6667	20.3612	13.479	13.4068	18.6488	9.93761	9.93761	9.93761	13.9743	13.4737	18.0868	13.7596	13.7495	16.2148	15.5357	15.2849	40.9515	14.7908	9.93761	13.8809	9.93761	13.8391	13.5127	13.2947	14.9269	17.1517	13.8362
ENSMUSG00000009073	Nf2	1158.37	713.441	759.441	1147.3	802.38	1366.82	1453.91	1005	1255.83	1328.31	710.019	1068.69	1171.68	762.129	879.092	1152.51	754.717	897.213	998.535	697.455	1184.28	1351.76	809.569	985.332	1073.74	726.72	741.45
ENSMUSG00000009075	Cabp7	26.2944	29.3131	26.3642	36.9521	23.051	31.0881	32.3881	28.2963	35.7717	31.5981	22.9076	21.6926	29.1712	25.7621	33.0223	30.6875	17.0031	18.5256	35.8207	20.707	24.8513	37.0044	27.6548	25.2962	19.9208	22.5819	20.5657
ENSMUSG00000009076	Zmat5	65.1647	49.9138	61.0578	60.4331	39.0481	63.8964	66.268	74.706	80.4496	78.9455	55.7386	49.7393	64.8506	36.6188	68.8714	56.4763	29.2178	38.8302	74.6596	39.7978	43.4583	93.6125	60.8163	53.6384	56.483	33.0718	24.6581
ENSMUSG00000009079	Ewsr1	2048.72	2081.73	1775.55	2331.42	2723.09	2173.46	2338.57	1963.9	1822.57	2854.94	2381.67	2100.67	2527.57	2347.83	2227.66	2301.17	2475.29	2504.88	2343.09	2645.59	2336.88	2195.4	2648.46	2132.35	2321.2	2690.99	2543.07
ENSMUSG00000009090	Ap1b1	896.849	816.981	870.18	728.027	784.066	540.912	929.547	1071.37	594.584	892.102	784.385	569.637	919.086	867.853	717.69	801.713	598.097	531.667	733.549	791.569	547.743	1088.87	830.381	574.114	620.073	702.441	395.309
ENSMUSG00000009092	Derl3	23.8796	56.5494	21.8734	24.8835	28.6336	24.6649	22.7089	30.2201	21.0038	15.2595	49.0724	23.016	18.8684	63.2705	36.3196	27.5097	44.0575	26.4995	31.2626	48.0661	26.025	27.25	45.1171	24.2861	29.9153	35.2816	21.9714
ENSMUSG00000009093	Gstt4	13.6667	13.7713	9.93761	9.93761	9.93761	9.93761	9.93761	9.93761	13.9743	9.93761	9.93761	9.93761	9.93761	14.0727	13.6478	13.4898	9.93761	13.1767	9.93761	9.93761	9.93761	9.93761	9.93761	9.93761	9.93761	13.6537	15.836
ENSMUSG00000009097	Tbx1	18.65	15.7325	30.6049	16.6298	15.565	13.1841	16.1572	24.323	13.9743	13.4737	9.93761	13.7596	9.93761	14.0727	21.2877	9.93761	15.4339	17.377	13.7122	13.8809	17.0748	9.93761	16.853	28.2472	22.0715	17.1517	23.332
ENSMUSG00000009108	Gnat2	43.017	42.0745	38.725	25.9433	39.0481	27.4723	28.3643	23.2926	23.9069	23.0069	34.4492	28.0302	38.4418	43.0995	35.2266	53.5756	54.2657	42.2193	77.8306	49.235	32.7729	25.9718	41.1208	32.0532	37.2349	31.9561	42.835
ENSMUSG00000009112	Bcl2l13	683.14	791.363	476.512	558.32	805.771	436.945	520.063	659.526	430.104	933.868	838.551	522.909	733.066	920.106	557.283	671.674	917.197	497.416	615.074	1013.4	527.847	709.364	849.302	378.201	696.803	1055.47	716.18
ENSMUSG00000009114	2610028H24Rik	13.6667	28.1004	15.2679	20.4268	41.935	20.7004	25.5931	51.1247	23.9069	16.7707	27.2688	17.377	21.6556	25.7621	18.6002	16.8046	28.1053	17.377	15.6382	26.1856	19.8798	25.9718	31.9151	21.1371	17.5991	28.5536	13.8362
ENSMUSG00000009145	Dqx1	81.7522	59.8474	44.6459	68.7093	55.3927	28.3876	79.6868	44.9014	25.3005	104.306	38.417	44.1813	115.185	54.5146	40.6432	114.419	49.1844	44.7398	110.415	52.7285	41.3537	108.052	71.463	45.6886	127.499	69.0151	48.6009
ENSMUSG00000009185	Ccl8	901.937	119.368	1167.95	311.311	150.789	79.3869	69.9375	103.147	152.159	79.8883	45.2297	60.7147	996.239	102.751	336.283	80.3804	39.9099	248.793	31.2626	28.7641	161.469	134.63	55.9455	192.297	252.957	26.2234	240.261
ENSMUSG00000009207	Lnpk1	249.434	369.662	271.66	269.969	410.27	272.128	203.74	272.2	156.842	286.8	325.242	215.823	243.507	318.463	254.492	284.235	539.36	265.539	354.161	504.727	282.058	241.643	313.731	244.117	336.437	476.829	422.787
ENSMUSG00000009210	Prr29	66.206	39.8063	32.6698	22.7079	26.2919	9.93761	9.93761	18.9056	9.93761	60.9436	37.4313	45.298	84.2229	41.814	34.1277	48.7149	55.2777	21.6925	51.1949	32.5214	27.1808	15.8406	18.2464	25.2962	85.4256	33.0718	25.957
ENSMUSG00000009214	Tmem8c	13.6667	15.7325	24.1619	9.93761	14.3493	23.703	16.1572	14.9877	21.0038	9.93761	9.93761	13.7596	9.93761	9.93761	49.1319	9.93761	9.93761	18.5256	9.93761	9.93761	9.93761	9.93761	9.93761	24.2861	9.93761	9.93761	32.1858
ENSMUSG00000009216	Fam163b	15.5658	9.93761	13.479	9.93761	9.93761	9.93761	9.93761	9.93761	9.93761	9.93761	9.93761	9.93761	9.93761	14.0727	15.5357	9.93761	13.5837	9.93761	9.93761	9.93761	9.93761	9.93761	9.93761	9.93761	9.93761	13.6537	15.836
ENSMUSG00000009246	Trpm5	46.229	118.293	57.2278	47.4167	146.02	36.344	48.9831	60.7906	28.0102	25.2432	63.2935	78.0626	35.0205	92.9294	66.81	20.7215	78.3123	65.3415	26.5451	52.7285	72.2074	19.1059	114.548	66.7152	31.7763	78.2874	57.7096
ENSMUSG00000009248	Ascl2	15.5658	15.7325	19.45	9.93761	14.3493	26.5477	14.0368	9.93761	30.6456	13.4737	13.4515	23.016	9.93761	9.93761	19.974	9.93761	13.5837	24.6231	9.93761	9.93761	27.1808	9.93761	9.93761	22.2107	9.93761	9.93761	23.332
ENSMUSG00000009281	Rarres2	189.276	57.65	861.804	429.896	91.3603	295.34	329.619	122.012	636.573	70.4423	63.2935	165.787	220.215	74.44	341.33	101.211	39.9099	387.48	41.3865	32.5214	317.897	72.4057	46.1101	229.681	209.517	21.3093	386.515
ENSMUSG00000009291	Pttg1ip	1883.88	2357.08	1814.63	2041.45	3444.69	2082.32	1838.18	2490.55	1993.99	1512.06	1991.54	2080.49	1254.11	2929.84	2091.5	2802.54	5730.33	2662.53	2124.89	5671.27	2135	1617.95	2648.46	1609.29	3123.36	8102.1	4964.16
ENSMUSG00000009292	Trpm2	26.2944	20.3612	34.7082	9.93761	21.3542	18.5479	16.1572	21.1647	9.93761	15.2595	13.4515	20.3245	18.8684	18.0487	21.2877	13.4898	21.0573	18.5256	9.93761	13.8809	15.4877	9.93761	15.3213	22.2107	14.9269	13.6537	19.0982
ENSMUSG00000009293	Ube2g2	359.445	361.118	364.796	390.374	417.056	259.319	335.609	322.453	288.896	320.245	254.477	227.525	322.865	336.705	317.101	472.38	499.22	349.233	383.275	489.038	260.15	465.117	343.081	214.391	598.388	617.463	501.915
ENSMUSG00000009350	Mpo	9.93761	13.7713	13.479	17.9706	12.8948	9.93761	9.93761	9.93761	16.057	13.4737	15.2244	18.8954	9.93761	14.0727	21.2877	9.93761	9.93761	13.1767	9.93761	9.93761	9.93761	9.93761	20.8034	23.2588	19.9208	9.93761	21.9714
ENSMUSG00000009356	Lpo	15.5658	20.3612	16.7818	13.4068	14.3493	20.7004	16.1572	13.3017	21.0038	21.852	24.0262	36.2615	22.9741	41.814	39.5687	19.4833	18.432	19.6189	9.93761	19.217	29.4496	9.93761	13.5127	26.2917	9.93761	18.616	23.332
ENSMUSG00000009376	Met	923.307	3452.08	703.605	1506.41	6019.78	1055.83	1119.9	5377.34	912.98	669.341	4250.59	1118.6	572.398	4700.15	1179.68	1651.08	8315.95	1674.39	1536.78	7976.65	1401.08	832.572	5331.96	599.553	2002.67	15742.3	3207.66
ENSMUSG00000009378	Slc16a12	54.6998	25.6267	109.223	113.262	30.1651	56.4993	90.6099	26.3348	50.5725	51.3611	27.2688	33.953	57.2511	29.9424	67.841	81.3301	26.9801	48.9091	51.1949	30.0289	43.4583	118.028	30.8638	52.7601	54.7603	34.18	61.1
ENSMUSG00000009394	Syn2	326.858	171.916	130.772	72.3729	42.6528	81.8222	130.446	47.5775	100.518	868.899	164.307	141.266	550.198	112.555	136.148	1141.29	76.3221	83.1828	1267.66	67.7055	89.3756	3341.5	374.319	218.638	605.06	51.328	61.1
ENSMUSG00000009406	Elk1	156.607	136.548	174.693	180.015	136.478	172.792	201.34	139.983	172.057	107.115	117.251	155.13	136.454	157.763	177.67	114.419	190.622	172.178	129.247	132.269	144.491	133.524	168.74	156.576	144.265	189.271	168.684
ENSMUSG00000009418	Nav1	1667.15	347.233	2179.37	1453.44	512.725	1104.59	1122.3	594.849	1054.09	1545.47	202.054	967.828	2230.61	292.92	1788.91	857.843	256.325	1979.35	722.117	207.593	1663.63	1351.76	271.117	1557.58	693.467	119.177	1146.84
ENSMUSG00000009470	Tnpo1	2881.05	2452.07	2197.98	3940.12	2922.48	3459.74	3004.15	2361.23	2644.67	4246.05	3172.01	3200.55	2878.43	2748.8	2696.67	5017.48	3089.89	3428.52	4778.57	3570.88	3509.34	3561.48	2446.03	2685.08	5379.71	4170.71	6296.63
ENSMUSG00000009471	Myod1	9.93761	9.93761	29.5605	9.93761	9.93761	80.1989	9.93761	18.9056	66.1923	9.93761	9.93761	15.7139	13.7495	9.93761	34.1277	13.4898	9.93761	63.7104	9.93761	9.93761	54.8697	9.93761	9.93761	36.6805	14.9269	9.93761	47.4533
ENSMUSG00000009487	Otog	13.6667	13.7713	9.93761	9.93761	9.93761	9.93761	14.0368	9.93761	13.9743	18.1446	13.4515	18.8954	17.3553	9.93761	13.6478	16.8046	9.93761	16.1484	15.6382	9.93761	9.93761	9.93761	9.93761	9.93761	24.119	15.5452	13.8362
ENSMUSG00000009535	Rnmt	430.716	721.981	385.28	420.914	815.268	330.549	309.248	405.043	241.02	457.684	730.217	458.122	379.977	645.463	379.686	446.178	1018.01	459.977	470.601	698.576	383.583	373.774	670.498	356.144	433.227	712.557	526.091
ENSMUSG00000009545	Kcnq1	49.4194	155.848	64.8747	38.8801	172.573	31.9757	40.1607	180.128	26.6665	31.5981	179.964	35.1106	38.4418	179.71	50.1826	26.4273	139.542	51.3955	36.9435	186.255	44.5062	23.3439	132.637	37.5936	26.097	101.842	38.1585
ENSMUSG00000009549	Srp14	462.274	315.187	405.762	408.339	258.894	322.548	424.254	384.611	427.77	723.177	394.14	383.764	515.313	341.569	320.13	550.045	255.345	286.268	534.006	299.596	319.888	811.671	326.04	329.842	406.529	288.57	319.454
ENSMUSG00000009551	6330409D20Rik	34.2929	17.4019	55.307	20.4268	21.3542	13.1841	14.0368	18.9056	16.057	9.93761	15.2244	13.7596	15.6976	16.2148	36.3196	18.1865	15.4339	30.1339	15.6382	17.6362	26.025	15.8406	13.5127	32.0532	9.93761	17.1517	28.4926
ENSMUSG00000009555	Cdk9	423.589	583.207	481.166	550.238	764.395	470.536	585.924	653.569	453.437	397.33	589.742	413.509	462.452	606.572	538.113	378.793	631.38	526.888	389.513	778.124	510.936	576.246	674.282	429.095	426.553	642.754	483.233
ENSMUSG00000009563	Tor2a	131.047	182.622	144.802	185.418	151.47	131.04	258.909	218.51	169.717	164.044	173.518	118.839	188.436	202.858	135.134	173.641	134.623	113.759	167.867	158.156	113.477	276.892	197.201	131.874	112.385	94.6885	100.178
ENSMUSG00000009566	Fpgs	134.116	134.402	188.691	245.694	201.138	162.363	352.382	192.073	205.968	164.976	132.033	150.865	151.32	190.677	214.074	132.307	175.899	201.723	191.838	178.39	201.367	237.236	186.768	205.895	102.293	150.704	200.634
ENSMUSG00000009569	Mkl2	1336.45	1809.58	1385.68	1651.84	2720.38	1312.46	1417.99	2842.79	1435.42	1147.33	1860.27	1067.63	953.964	1815.64	1322.91	1221.73	1187.33	1132.12	1227.14	1586.97	1264.84	987.675	2514.14	1287.14	1273.88	1303.29	772.213
ENSMUSG00000009575	Cbx5	771.679	565.059	888.791	853.726	505.262	1190.14	1112.72	895.237	965.459	923.658	761.433	605.744	790.142	718.38	728.787	651.091	411.098	546.8	528.809	483.434	636.273	894.174	630.762	761.503	693.467	697.383	516.201
ENSMUSG00000009580	Odam	9.93761	9.93761	9.93761	9.93761	12.8948	9.93761	14.0368	17.6985	9.93761	9.93761	13.4515	9.93761	9.93761	14.0727	9.93761	9.93761	13.5837	9.93761	9.93761	9.93761	9.93761	9.93761	15.3213	9.93761	9.93761	13.6537	9.93761
ENSMUSG00000009585	Apobec3	327.876	387.818	268.865	395.763	319.325	439.344	496.113	424.623	456.937	334.178	421.694	304.073	274.199	432.757	293.879	382.537	140.526	210.502	340.643	170.523	309.933	419.999	597.647	451.996	172.728	114.083	117.902
ENSMUSG00000009588	St6galnac1	35.4005	232.899	44.6459	24.8835	171.893	25.6124	35.0106	185.248	25.3005	18.1446	220.454	49.7393	32.7075	406.012	109.75	25.33	78.3123	31.0242	21.5204	67.7055	19.8798	24.6715	313.731	26.2917	66.758	113.064	20.5657
ENSMUSG00000009596	Taf7l	13.6667	9.93761	25.2718	9.93761	12.8948	25.6124	17.9712	9.93761	9.93761	9.93761	9.93761	21.6926	13.7495	9.93761	19.974	9.93761	13.5837	23.6643	9.93761	9.93761	26.025	13.8391	13.5127	33.9181	9.93761	13.6537	20.5657
ENSMUSG00000009614	Sardh	74.5123	116.144	165.356	73.2876	81.7384	178.406	79.6868	105.723	152.159	80.8307	110.777	158.328	71.3296	165.081	165.526	37.8435	48.1632	112.956	25.3272	80.2558	130.496	46.3412	75.3172	160.831	49.5684	40.7121	103.505
ENSMUSG00000009621	Vav2	395.082	626.976	524.913	505.337	889.878	611.282	643.399	900.342	546.76	327.676	571.378	496.358	258.325	709.873	492.709	317.944	471.806	519.719	263.671	621.264	634.284	319.835	961.876	523.234	209.517	325.019	256.764
ENSMUSG00000009628	Tex15	135.139	42.0745	48.5453	453.248	66.5424	81.0107	486.532	108.297	86.364	187.319	43.2963	88.8325	124.761	37.9269	57.493	172.702	57.298	75.9028	168.91	73.42	76.2578	247.152	49.0772	66.7152	107.341	60.7285	65.605
ENSMUSG00000009630	Ppp2cb	839.862	808.442	567.728	1012.64	1010.61	886.331	1009.76	919.062	891.988	1528.77	1138.74	1136.65	916.972	938.333	877.075	1294.69	1187.33	882.879	1085.82	1453.66	889.9	1064.67	891.872	595.313	1298.89	1517.72	1526.94
ENSMUSG00000009633	G0s2	33.1787	51.0241	66.779	20.4268	28.6336	54.8478	17.9712	41.3068	64.9988	13.4737	28.3213	24.3053	18.8684	51.9968	31.9094	9.93761	17.0031	30.1339	13.7122	27.484	33.8645	9.93761	33.9963	32.9883	14.9269	27.3961	21.9714
ENSMUSG00000009640	Dmap1	107.479	94.6052	114.85	106.927	81.7384	109.306	156.91	134.851	104.049	118.339	108.926	117.77	95.9912	105.204	102.627	92.7034	85.2658	69.4113	93.63	87.0733	104.452	146.789	122.169	103.695	88.8049	127.321	55.4426
ENSMUSG00000009646	Pla2g12b	15.5658	17.4019	15.2679	9.93761	12.8948	13.1841	9.93761	9.93761	9.93761	15.2595	9.93761	21.6926	17.3553	9.93761	15.5357	13.4898	15.4339	13.1767	18.7699	13.8809	17.0748	9.93761	13.5127	18.8843	14.9269	9.93761	17.5405
ENSMUSG00000009647	Mcu	409.336	258.555	292.155	272.665	206.577	302.542	296.066	249.195	327.417	479.038	223.213	310.45	383.149	253.987	304.986	618.346	368.989	280.687	761.607	234.533	280.066	337.45	191.511	251.759	655.103	318.945	332.648
ENSMUSG00000009654	Oit3	30.927	17.4019	21.8734	9.93761	16.6604	25.6124	16.1572	14.9877	13.9743	18.1446	16.7239	23.016	13.7495	9.93761	18.6002	24.2152	19.7744	17.377	24.0875	15.9075	17.0748	15.8406	13.5127	30.1649	17.5991	17.1517	24.6581
ENSMUSG00000009670	Tex11	15.5658	15.7325	16.7818	15.1536	15.565	9.93761	21.2029	13.3017	13.9743	24.1357	16.7239	13.7596	17.3553	14.0727	9.93761	54.5437	13.5837	13.1767	36.9435	9.93761	15.4877	17.5467	16.853	14.9767	58.2023	15.5452	15.836
ENSMUSG00000009681	Bcr	1504.34	1477.66	1247.97	2312.57	1970.97	1509.12	2246.39	1543.59	1380.61	2119.01	1140.58	1289.53	1678.96	1515.51	1497.41	3097.18	2531.07	1604.32	2776.36	2340.89	1492.58	2573.77	1240.94	1036.2	2001.01	3378.76	1599.44
ENSMUSG00000009687	Fxyd5	402.209	120.443	751.996	353.541	152.151	195.241	83.3323	274.755	293.566	89.2987	63.2935	86.6816	254.091	122.346	425.101	87.9692	85.2658	320.543	71.4838	63.1187	201.367	54.3546	73.391	250.061	150.966	111.025	231.457
ENSMUSG00000009731	Kcnd1	27.4731	26.8726	80.9951	38.8801	25.4965	62.2569	37.599	20.056	52.9939	25.2432	24.0262	56.3419	37.3069	24.3197	57.493	27.5097	23.5026	53.0478	26.5451	19.217	69.1639	23.3439	27.6548	64.1119	37.2349	22.5819	32.1858
ENSMUSG00000009733	Tfcp2	110.557	94.6052	115.788	106.021	68.6219	176.802	164.12	125.438	173.227	102.433	77.3459	116.701	105.596	84.3156	118.896	93.6495	64.3372	82.3749	104.127	61.9694	119.487	144.579	120.264	125.904	61.632	46.0504	50.8893
ENSMUSG00000009734	Pou6f2	15.5658	15.7325	13.479	9.93761	9.93761	13.1841	9.93761	9.93761	9.93761	18.1446	9.93761	9.93761	18.8684	9.93761	9.93761	34.8101	13.5837	16.1484	35.8207	9.93761	13.6175	28.5101	9.93761	13.2947	24.119	9.93761	9.93761
ENSMUSG00000009739	Pou6f1	151.498	201.884	247.433	269.07	281.304	336.95	273.294	283.274	216.486	95.8707	179.964	220.079	127.952	215.036	269.642	134.189	147.41	292.645	150.134	210.961	318.892	215.196	266.381	238.173	107.341	92.6427	149.937
ENSMUSG00000009741	Ubp1	1109.53	1172.41	966.026	1048.55	1269.7	912.715	1027.72	711.436	598.083	949.646	1004.72	971.013	873.639	1003.95	1030.4	1063.64	1632.64	1244.4	1198.04	1338.28	1087.81	773.169	1117.02	1009.07	1043.72	1653.25	1497.28
ENSMUSG00000009772	Nuak2	198.457	84.8805	190.557	172.811	147.383	86.6864	214.538	161.346	73.334	70.4423	59.5229	101.713	183.137	85.5475	169.575	83.2285	84.2735	190.547	118.79	93.8767	170.451	353.962	109.781	134.431	87.1156	75.2013	141.108
ENSMUSG00000009828	Ick	330.932	218.998	348.035	285.249	197.739	620.078	373.946	287.533	532.762	283.084	290.324	425.194	295.36	263.722	417.028	341.35	115.91	371.544	293.841	172.771	450.249	374.875	275.853	431.64	713.483	154.767	302.96
ENSMUSG00000009863	Sdhb	457.184	348.301	372.245	381.391	267.044	349.752	403.892	359.069	461.603	715.751	507.101	412.447	579.797	412.09	329.216	519.167	265.146	273.512	385.355	419.552	300.974	556.442	324.146	291.656	383.167	326.032	265.565
ENSMUSG00000009876	Cox4i2	41.9405	30.5128	59.1446	29.0427	32.4281	43.1689	26.9899	26.3348	35.7717	16.7707	39.399	40.8118	29.1712	29.9424	63.7123	56.4763	59.3139	39.681	55.5006	37.3982	37.1023	19.1059	37.0752	47.4649	40.8021	26.2234	25.957
ENSMUSG00000009894	Snap47	259.625	186.903	221.333	179.115	141.25	355.352	342.798	260.272	413.77	402.902	208.495	300.885	279.489	165.081	242.369	247.704	105.057	168.982	211.628	160.405	294.005	460.715	204.787	345.963	241.265	92.6427	125.643
ENSMUSG00000009905	Kdsr	687.211	720.913	511.883	454.146	661.969	472.936	444.615	528.466	412.603	758.448	855.994	702.377	542.799	718.38	558.292	841.004	818.34	651.136	921.639	899.123	648.21	667.56	624.139	503.729	671.783	569.913	728.265
ENSMUSG00000009907	Vps4b	1186.86	1267.4	895.304	1320.57	1488.08	954.29	1160.6	1079.88	861.666	1468.45	1321.42	960.396	1106.15	1256.7	823.611	1628.63	1671.79	993.568	1609.52	1625.06	940.623	1274.77	1334.58	836.962	1415.64	1333.63	1110.59
ENSMUSG00000009927	Rps25	666.857	775.352	616.124	2276.66	2343.3	2200.64	2072.81	2852.15	2930.36	3398.76	4032.12	3021.13	2688.2	3000.31	2386.01	2019.63	2726.81	1967.41	1871.36	3201.22	2316	2404.39	2211.45	1932.29	2179.45	2646.49	2804.51
ENSMUSG00000009941	Nxf2	13.6667	15.7325	16.7818	9.93761	12.8948	19.6446	14.0368	14.9877	17.8368	15.2595	9.93761	9.93761	9.93761	14.0727	13.6478	16.8046	9.93761	13.1767	9.93761	19.217	17.0748	13.8391	15.3213	13.2947	9.93761	9.93761	13.8362
ENSMUSG00000009995	Taz	280.002	293.819	254.888	331.978	326.113	212.87	399.101	302.865	235.179	285.871	263.67	180.7	298.534	288.054	210.031	346.03	194.547	193.74	421.743	206.47	188.406	468.418	414.072	241.57	166.034	118.158	97.9583
ENSMUSG00000010021	Kif19a	23.8796	15.7325	37.7272	57.6615	23.051	24.6649	72.3793	36.7568	25.3005	16.7707	15.2244	20.3245	13.7495	21.3178	26.1906	27.5097	22.2966	22.6886	21.5204	22.1349	22.4343	30.9867	28.735	25.2962	9.93761	15.5452	23.332
ENSMUSG00000010025	Aldh3a2	1638.66	483.92	711.05	1059.32	324.755	516.121	1124.69	508.89	609.747	2408.55	444.654	685.387	1738.14	262.505	630.932	2875.49	299.442	444.045	2546.74	342.205	486.065	2502.28	451.927	516.45	3003.29	294.645	538.179
ENSMUSG00000010044	Zmynd10	20.0331	24.3589	19.45	19.2276	30.9236	19.6446	17.9712	22.2414	19.4663	9.93761	22.9076	29.2373	17.3553	24.3197	30.788	25.33	23.5026	37.9768	25.3272	17.6362	40.2966	17.5467	28.735	32.9883	22.0715	29.6983	21.9714
ENSMUSG00000010045	Tmem115	180.092	260.692	266.069	220.513	303.032	296.14	309.248	338.633	330.919	225.457	187.329	246.668	219.156	247.903	244.389	190.528	327.851	296.631	163.696	385.925	287.036	282.398	310.891	253.457	231.241	357.412	304.059
ENSMUSG00000010047	Hyal2	147.41	110.766	246.501	113.262	108.486	240.904	148.494	112.586	274.886	115.534	90.3811	222.206	136.454	146.781	245.4	77.5291	114.924	311.776	71.4838	139.026	366.666	154.522	142.146	331.539	181.093	187.243	318.354
ENSMUSG00000010048	Ifrd2	143.321	196.534	151.344	159.297	197.059	175.198	226.534	238.968	168.547	178.943	211.255	149.799	196.912	263.722	159.452	150.168	233.779	178.569	105.175	228.921	181.425	185.425	219.954	165.936	166.034	261.226	217.149
ENSMUSG00000010051	Hyal1	199.477	126.888	266.069	157.494	132.386	765.602	170.126	148.532	731.045	135.147	142.183	427.318	144.951	197.986	383.723	114.419	118.868	508.568	111.462	163.778	701.921	144.579	184.871	566.482	264.648	113.064	286.463
ENSMUSG00000010054	Tusc2	115.684	138.694	127.964	151.184	141.25	135.863	210.939	155.367	139.272	133.281	118.176	135.93	162.991	154.103	158.439	173.641	176.881	170.58	159.524	209.839	168.455	214.094	202.891	171.891	147.616	237.926	192.925
ENSMUSG00000010057	Nprl2	110.557	87.0439	101.713	107.832	97.5324	95.586	126.834	116.015	121.678	106.179	107.074	85.6057	121.57	85.5475	103.645	109.705	66.3409	98.4958	139.695	83.6665	99.4317	171.082	110.734	101.984	76.9601	78.2874	85.7312
ENSMUSG00000010064	Slc38a3	17.1791	32.8803	30.6049	26.9885	18.6488	27.4723	26.9899	28.2963	31.9425	9.93761	27.2688	36.2615	9.93761	46.9317	38.4901	15.2849	18.432	31.9087	9.93761	22.1349	19.8798	15.8406	28.735	32.0532	26.097	18.616	40.5054
ENSMUSG00000010066	Cacna2d2	23.8796	21.735	26.3642	17.9706	24.6922	19.6446	24.1686	18.9056	22.4783	15.2595	25.1237	28.0302	13.7495	21.3178	26.1906	13.4898	18.432	21.6925	15.6382	23.5173	32.7729	23.3439	29.8041	27.2748	9.93761	18.616	19.0982
ENSMUSG00000010067	Rassf1	733.007	890.63	902.749	1005.45	1374.82	1163.76	723.62	865.455	846.505	488.322	644.832	1187.61	537.513	990.585	1024.35	785.809	1475.07	1275.46	614.035	1329.32	1096.76	578.446	1134.04	898.854	723.491	1218.32	805.173
ENSMUSG00000010080	Epn3	312.599	263.898	118.599	404.746	370.231	118.167	638.609	476.547	158.013	402.902	234.249	98.4965	441.306	267.372	148.31	362.88	213.186	132.994	330.244	281.652	142.493	675.261	454.766	159.98	304.721	195.356	38.1585
ENSMUSG00000010086	Rnf112	9.93761	9.93761	9.93761	16.6298	12.8948	13.1841	17.9712	13.3017	9.93761	9.93761	9.93761	9.93761	9.93761	9.93761	9.93761	13.4898	9.93761	13.1767	9.93761	9.93761	9.93761	9.93761	9.93761	9.93761	9.93761	9.93761	9.93761
ENSMUSG00000010095	Slc3a2	1839.11	3370.97	2385.93	1491.14	4270.73	3498.11	1431.16	5088.06	3802.59	1875.86	3283.08	2913.9	1449.63	3118.17	2437.45	1203.96	3707.43	2820.19	1140.89	4964.42	3260.73	1534.35	3572.6	2471.45	1947.64	3241.21	3269.18
ENSMUSG00000010097	Nxf1	1415.81	1798.91	1521.53	1740.72	2360.26	1508.32	1695.72	1472.12	1241.84	1283.76	1843.75	1735.45	1482.39	1830.22	1900.87	1502.35	2188.54	2472.23	1570.03	2153.81	2119.09	1368.26	2123.48	1685.59	1365.6	2310.69	2633.14
ENSMUSG00000010110	Stx5a	743.184	919.449	702.674	664.277	935.322	600.087	709.252	667.185	571.255	723.177	750.415	646.097	677.045	794.941	709.62	750.26	895.664	812.004	833.311	906.966	777.512	580.647	861.6	694.521	730.163	561.819	521.696
ENSMUSG00000010122	Slc47a1	13.6667	9.93761	15.2679	15.1536	9.93761	14.8024	14.0368	9.93761	9.93761	9.93761	9.93761	15.7139	9.93761	9.93761	13.6478	9.93761	9.93761	19.6189	13.7122	9.93761	15.4877	9.93761	9.93761	9.93761	9.93761	13.6537	17.5405
ENSMUSG00000010136	Pifo	15.5658	13.7713	13.479	9.93761	9.93761	9.93761	14.0368	13.3017	9.93761	9.93761	9.93761	9.93761	13.7495	16.2148	15.5357	20.7215	15.4339	9.93761	13.7122	13.8809	9.93761	15.8406	13.5127	13.2947	9.93761	13.6537	9.93761
ENSMUSG00000010142	Tnfrsf13b	48.358	25.6267	55.307	33.0454	29.4019	22.7241	17.9712	26.3348	25.3005	18.1446	18.0868	20.3245	25.5158	22.842	27.3604	18.1865	15.4339	28.3332	20.1755	19.217	22.4343	13.8391	23.1823	34.8431	17.5991	13.6537	19.0982
ENSMUSG00000010154	Spire2	49.4194	36.3702	36.7253	50.2263	27.8596	49.8717	100.292	38.5858	31.9425	59.0352	30.3951	26.8079	72.407	31.3005	39.5687	84.1772	31.4111	32.7879	71.4838	36.1898	37.1023	71.2844	35.0277	27.2748	102.293	46.0504	21.9714
ENSMUSG00000010175	Prox1	214.775	228.622	243.705	196.219	276.551	208.063	176.132	151.95	186.093	134.214	332.592	93.1304	166.173	260.072	289.84	214.906	156.255	162.59	235.573	224.432	176.437	226.217	197.201	268.738	95.554	123.25	169.787
ENSMUSG00000010205	Raver1	623.094	759.341	631.945	602.32	800.345	669.653	783.484	725.902	575.921	830.845	848.649	681.139	716.154	907.954	788.305	711.903	985.711	726.793	623.388	1050.37	627.321	701.664	741.454	558.85	651.767	1160.67	867.795
ENSMUSG00000010277	2610507B11Rik	2913.61	3014.51	2279.86	3083.7	3313.8	2507.62	3396.8	3355.83	2514.07	3267.91	3295.94	2063.51	3193.35	3663.72	2560.51	3034.51	2700.38	2359.96	2508.29	3277.39	2310.03	3530.68	3372.07	2201.87	3078.33	3246.26	1788.39
ENSMUSG00000010290	AI597479	135.139	101.075	133.579	162.901	116.005	291.338	174.931	136.562	222.328	215.228	121.873	165.787	130.078	110.106	137.162	199.906	141.51	169.781	203.296	131.142	218.311	188.734	130.734	193.997	186.111	173.04	138.9
ENSMUSG00000010307	Tmem86a	2419.1	655.798	510.021	49.2913	39.7724	81.0107	52.7171	48.4663	94.6264	4127.26	250.8	138.065	3334.96	185.803	396.844	2211.38	66.3409	97.6913	1156.48	56.205	124.493	2750.86	231.327	230.53	1350.59	53.4264	74.5739
ENSMUSG00000010311	Optc	15.5658	13.7713	18.1584	19.2276	18.6488	38.0657	14.0368	22.2414	40.7747	16.7707	25.1237	38.5462	13.7495	33.9793	42.7819	15.2849	13.5837	29.2372	13.7122	13.8809	30.5665	15.8406	64.6972	43.9053	14.9269	23.8208	21.9714
ENSMUSG00000010342	Tex14	27.4731	32.8803	35.7191	24.8835	30.9236	37.2064	21.2029	29.2623	22.4783	34.6581	37.4313	49.7393	40.6978	41.814	33.0223	20.7215	43.025	41.3753	31.2626	26.1856	43.4583	19.1059	29.8041	33.9181	40.8021	36.3774	32.1858
ENSMUSG00000010358	Ifi35	310.562	288.477	359.209	347.252	228.324	200.851	360.768	241.525	244.524	369.471	253.558	234.97	375.747	359.809	294.889	423.718	241.622	228.853	380.156	239.021	173.444	455.213	227.536	225.434	431.558	540.572	287.563
ENSMUSG00000010362	Rdm1	70.3642	44.3283	80.9951	87.8745	59.5873	83.4445	94.2432	80.7607	113.457	74.2259	54.79	56.3419	58.34	53.2568	51.2315	59.3676	41.9898	44.7398	58.7151	49.235	85.3456	80.238	62.7583	73.6361	54.7603	34.18	27.2339
ENSMUSG00000010376	Nedd8	346.207	297.025	331.273	369.712	254.139	373.752	408.684	371.84	516.431	673.054	434.552	385.889	468.795	396.285	336.283	394.704	248.484	259.957	336.483	337.72	350.742	576.246	292.899	339.176	406.529	426.233	454.66
ENSMUSG00000010392	Gosr1	445.986	370.73	376.9	574.484	442.841	485.732	589.516	480.803	425.437	493.893	482.307	356.141	356.711	415.738	339.311	656.705	471.806	399.431	569.344	644.794	443.284	574.046	434.892	390.925	524.988	674.115	581.033
ENSMUSG00000010406	Mrpl52	250.453	260.692	229.724	344.557	185.499	188.027	491.323	245.786	327.417	393.616	270.104	199.862	273.14	206.512	169.575	365.688	233.779	124.984	318.804	243.51	155.478	382.579	207.631	154.873	219.545	198.398	166.48
ENSMUSG00000010453	Kansl3	858.179	939.729	777.122	886.047	1150.33	758.406	807.429	851.84	675.062	577.443	671.458	824.487	710.869	876.359	838.743	994.421	1272.48	1006.31	1027.63	1244.18	824.258	656.559	902.278	855.615	943.654	1035.24	812.863
ENSMUSG00000010461	Eya4	25.0979	18.9262	70.5804	49.2913	27.0793	58.1477	26.9899	16.4093	48.1418	15.2595	15.2244	23.016	21.6556	16.2148	39.5687	23.0791	17.0031	52.2221	9.93761	20.707	44.5062	9.93761	16.853	32.0532	29.9153	15.5452	39.3343
ENSMUSG00000010476	Ebf3	152.52	32.8803	417.865	168.307	64.4599	93.1609	55.1954	66.8944	126.373	18.1446	18.0868	63.9828	68.0935	50.7345	259.542	31.7284	21.0573	152.197	18.7699	20.707	149.486	13.8391	28.735	205.045	31.7763	13.6537	115.689
ENSMUSG00000010492	Uckl1os	115.684	108.614	110.161	148.479	111.904	122.192	236.128	104.864	119.33	137.013	90.3811	80.2199	129.015	103.978	102.627	116.304	85.2658	104.927	135.517	84.8025	136.496	171.082	137.392	127.61	107.341	85.4733	56.5768
ENSMUSG00000010505	Myt1	9.93761	9.93761	9.93761	26.9885	16.6604	9.93761	25.5931	17.6985	9.93761	9.93761	9.93761	9.93761	17.3553	9.93761	15.5357	13.4898	13.5837	13.1767	15.6382	13.8809	9.93761	17.5467	13.5127	9.93761	9.93761	9.93761	15.836
ENSMUSG00000010517	Faf1	814.421	748.667	605.886	820.506	737.942	596.888	821.797	788.872	609.747	1336.66	999.207	676.892	1001.52	837.473	584.524	1140.35	867.279	445.638	1215.71	748.994	532.821	1210.97	729.155	507.121	960.332	907.791	501.915
ENSMUSG00000010529	Gm266	23.8796	244.659	42.6833	16.6298	72.0819	18.5479	32.3881	131.429	28.0102	27.4083	331.673	41.9384	29.1712	243.035	42.7819	15.2849	43.025	21.6925	9.93761	108.582	26.025	21.9819	198.149	20.0315	22.0715	69.0151	20.5657
ENSMUSG00000010538	Tsacc	34.2929	34.0508	28.5065	36.9521	34.6587	31.0881	35.0106	41.3068	31.9425	36.6706	47.1547	33.953	25.5158	31.3005	28.5152	41.8339	40.9515	33.6624	31.2626	31.2807	32.7729	42.8689	47.101	27.2748	22.0715	43.9237	34.5965
ENSMUSG00000010554	Mettl16	228.029	331.21	289.36	260.08	350.549	368.153	306.852	328.414	361.261	385.258	418.939	363.579	322.865	344.001	257.522	234.587	552.086	334.888	282.398	509.209	283.053	385.881	347.814	332.388	378.161	809.67	641.466
ENSMUSG00000010601	Apol7a	37.5986	72.9506	21.8734	13.4068	67.9291	16.1637	19.6336	72.1059	17.8368	71.3889	82.0081	26.8079	72.407	119.899	52.2787	57.4411	41.9898	25.5674	67.2405	56.205	28.3216	66.7916	84.9244	25.2962	85.4256	72.1108	21.9714
ENSMUSG00000010607	Pigyl	48.358	67.5052	55.307	34.0295	43.3692	39.7761	71.1588	67.7642	69.767	59.9898	67.0527	36.2615	51.7851	57.0244	37.4072	38.8463	28.1053	23.6643	47.9472	45.7202	33.8645	80.238	60.8163	33.9181	28.025	31.9561	24.6581
ENSMUSG00000010608	Rbm25	3133.39	3460.62	2412.91	3201.3	3876.7	2490.03	2643.83	2681.14	1904.2	3150.05	3835.68	2739.79	2991.5	2860.58	2701.71	3410.53	5193.04	3520.88	3576.42	3850.94	2965.38	2693.66	3460.04	2822.41	3311.81	5079.97	3960.13
ENSMUSG00000010609	Psen2	325.839	201.884	225.063	206.118	106.433	114.141	210.939	184.395	186.093	513.389	152.327	133.795	451.879	148.001	156.414	294.536	81.2946	128.99	307.363	96.1419	143.492	464.016	138.343	142.952	316.406	111.025	116.795
ENSMUSG00000010651	Acaa1b	28.6366	63.135	26.3642	22.7079	36.1312	21.7248	26.9899	44.0058	13.9743	19.4336	53.8402	38.5462	17.3553	40.5238	27.3604	25.33	55.2777	17.377	27.745	60.8191	22.4343	23.3439	45.1171	18.8843	22.0715	34.18	25.957
ENSMUSG00000010660	Plcd1	300.376	276.723	267.933	174.612	232.401	226.488	140.075	150.241	278.389	325.818	104.296	197.733	348.25	165.081	292.869	311.39	248.484	291.051	379.116	214.329	266.125	192.043	229.432	318.812	411.535	259.2	280.964
ENSMUSG00000010663	Fads1	249.434	2147.9	902.749	261.878	1789.21	1748.96	355.976	2490.55	1808.58	123.01	2749.76	1753.5	231.862	2920.12	1306.78	75.6263	910.346	896.417	46.8604	1822.22	1469.7	135.736	2254.96	1076.05	92.1809	807.647	568.946
ENSMUSG00000010721	Lmbr1	298.339	257.486	301.47	293.338	218.131	353.752	300.86	266.236	362.428	284.013	221.374	266.87	276.315	225.993	247.42	351.647	222.013	250.388	408.227	206.47	314.911	382.579	269.223	297.597	204.503	134.442	185.214
ENSMUSG00000010751	Tnfrsf22	85.8802	29.3131	103.592	65.9562	38.322	96.3941	61.3605	43.1083	86.364	90.2383	38.417	63.9828	69.1729	25.7621	88.351	45.7788	26.9801	59.6229	45.7712	30.0289	67.1318	50.9328	32.959	75.3623	63.343	34.18	128.958
ENSMUSG00000010755	Cars	730.972	616.301	446.724	395.763	497.12	278.532	335.609	294.348	243.356	553.307	289.405	325.327	609.395	384.127	351.424	581.857	1514.22	778.558	650.41	810.615	432.34	433.204	280.588	260.249	1212.17	1472.2	1136.95
ENSMUSG00000010760	Phlda2	74.5123	64.2289	60.1017	69.6259	83.8027	49.0386	100.292	79.8967	52.9939	77.0588	64.2343	86.6816	52.8814	50.7345	66.81	61.2905	115.91	66.1564	58.7151	123.253	65.0969	56.6273	83.9653	40.3141	70.1652	58.648	57.7096
ENSMUSG00000010797	Wnt2	27.4731	9.93761	51.4515	69.6259	19.5784	47.3688	40.1607	17.6985	68.5763	16.7707	9.93761	35.1106	27.9689	16.2148	37.4072	25.33	15.4339	54.6964	15.6382	15.9075	48.674	21.9819	9.93761	41.2154	31.7763	9.93761	47.4533
ENSMUSG00000010803	Gabra1	9.93761	9.93761	20.6831	9.93761	9.93761	9.93761	17.9712	9.93761	9.93761	9.93761	9.93761	9.93761	9.93761	9.93761	13.6478	9.93761	9.93761	9.93761	9.93761	9.93761	9.93761	9.93761	9.93761	14.9767	9.93761	9.93761	9.93761
ENSMUSG00000010825	Grid2ip	17.1791	17.4019	15.2679	9.93761	12.8948	9.93761	22.7089	14.9877	9.93761	13.4737	13.4515	15.7139	15.6976	14.0727	21.2877	9.93761	9.93761	23.6643	17.2759	9.93761	18.5208	9.93761	13.5127	16.3947	22.0715	9.93761	9.93761
ENSMUSG00000010830	Kdelr3	125.928	122.592	287.497	143.068	122.834	236.099	124.424	76.4375	229.338	93.0555	88.5223	201.99	124.761	101.525	231.255	114.419	109.993	200.126	119.836	118.741	195.386	75.7658	118.359	167.638	140.914	96.7334	241.361
ENSMUSG00000010841	1700006E09Rik	18.65	17.4019	20.6831	13.4068	21.3542	14.8024	16.1572	17.6985	16.057	18.1446	13.4515	15.7139	20.2925	21.3178	13.6478	15.2849	25.84	14.7908	18.7699	17.6362	19.8798	19.1059	15.3213	18.8843	17.5991	13.6537	15.836
ENSMUSG00000010911	Apip	85.8802	79.465	87.6001	60.4331	63.0697	85.8762	77.2537	79.8967	91.0876	102.433	125.569	84.5293	107.728	78.148	88.351	67.9969	54.2657	65.3415	49.0318	66.5602	72.2074	99.1711	87.8002	83.9739	51.3035	50.2763	74.5739
ENSMUSG00000010914	Pdhx	121.832	156.92	127.028	174.612	167.129	128.628	160.515	161.346	120.504	173.357	191.931	171.114	161.93	178.491	158.439	155.804	166.079	136.196	185.587	233.411	155.478	141.263	150.698	129.316	93.8678	183.186	191.823
ENSMUSG00000010936	Vac14	281.021	282.066	310.784	255.585	299.637	267.325	300.86	306.272	258.538	263.569	352.804	239.224	294.302	348.865	314.073	253.325	368.989	271.918	276.156	372.473	272.1	230.625	290.058	256.004	246.276	432.305	269.965
ENSMUSG00000011008	Mcoln2	79.6859	21.735	108.285	81.5027	40.4949	44.0121	37.599	29.2623	42.0121	38.6655	16.7239	33.953	69.1729	22.842	88.351	42.8238	28.1053	260.755	24.0875	23.5173	74.2336	23.3439	25.4544	42.1142	93.8678	23.8208	96.8483
ENSMUSG00000011034	Slc5a1	46.229	428.397	48.5453	80.5913	723.019	47.3688	69.9375	611.87	37.0317	35.6667	458.43	47.5234	45.1649	503.261	88.351	28.5794	1122.74	128.189	25.3272	977.546	94.4067	44.0295	766.997	32.0532	71.8662	2344.07	180.807
ENSMUSG00000011052	1700049J03Rik	9.93761	13.7713	9.93761	9.93761	14.3493	14.8024	17.9712	13.3017	13.9743	13.4737	13.4515	13.7596	17.3553	16.2148	15.5357	13.4898	9.93761	18.5256	9.93761	15.9075	9.93761	13.8391	13.5127	14.9767	9.93761	9.93761	17.5405
ENSMUSG00000011096	Akt1s1	256.568	283.134	243.705	225.01	218.131	299.341	407.486	324.156	351.926	306.311	299.514	229.652	267.849	311.165	256.512	279.552	177.863	225.662	191.838	240.144	253.179	361.667	268.275	224.584	314.737	239.953	229.256
ENSMUSG00000011114	Tbrg1	591.543	615.233	555.628	630.157	529.007	470.536	743.974	594.849	596.916	745.453	559.441	465.557	653.791	582.265	515.916	657.64	659.768	408.195	548.557	662.722	389.554	642.257	580.616	399.408	796.881	955.333	618.392
ENSMUSG00000011118	Panx3	13.6667	9.93761	9.93761	15.1536	16.6604	9.93761	9.93761	14.9877	9.93761	9.93761	15.2244	9.93761	13.7495	14.0727	15.5357	9.93761	9.93761	9.93761	13.7122	13.8809	9.93761	9.93761	13.5127	13.2947	9.93761	9.93761	13.8362
ENSMUSG00000011148	Adssl1	79.6859	57.65	74.3735	120.496	58.8895	69.6194	126.834	84.214	81.6335	45.5476	59.5229	79.1415	63.768	70.7252	72.9867	95.5411	52.2377	61.2597	113.557	59.6676	65.0969	114.704	72.4272	83.114	37.2349	30.832	39.3343
ENSMUSG00000011154	Cfap161	13.6667	13.7713	13.479	9.93761	9.93761	9.93761	9.93761	9.93761	13.9743	9.93761	9.93761	9.93761	9.93761	9.93761	9.93761	9.93761	9.93761	9.93761	9.93761	9.93761	9.93761	9.93761	13.5127	9.93761	17.5991	17.1517	19.0982
ENSMUSG00000011158	Brf1	370.646	408.108	386.211	330.181	458.447	437.744	400.299	428.879	390.434	347.181	337.186	393.325	354.595	443.698	446.293	318.881	385.637	408.195	381.196	381.441	438.31	415.596	444.356	483.375	303.051	423.197	251.263
ENSMUSG00000011171	Vipr2	29.7873	18.9262	60.1017	37.9179	16.6604	36.344	36.3085	20.056	44.4744	13.4737	16.7239	18.8954	24.2585	27.1766	60.6071	13.4898	19.7744	48.9091	15.6382	17.6362	37.1023	13.8391	16.853	36.6805	22.0715	19.9927	29.736
ENSMUSG00000011179	Odc1	572.205	486.055	991.15	1043.16	1180.17	2298.17	805.035	1238.99	1764.27	982.13	1692.28	3675.11	833.476	1387.93	2167.14	593.084	919.155	3004.12	512.179	1034.68	2694.88	594.95	795.378	1194.74	995.357	2090.2	5790.22
ENSMUSG00000011254	Thg1l	109.531	122.592	110.161	80.5913	96.1616	112.529	91.8214	100.57	140.444	137.946	176.281	115.631	111.99	126.014	94.4751	144.53	150.359	104.124	114.604	228.921	143.492	79.1208	101.191	84.8335	145.941	229.82	197.33
ENSMUSG00000011256	Adam19	181.112	29.3131	566.797	282.553	120.103	672.052	156.91	85.0767	357.761	23.0069	22.9076	171.114	144.951	51.9968	467.483	69.9073	25.84	460.773	20.1755	24.8652	293.009	46.3412	40.1147	298.445	147.616	18.616	460.155
ENSMUSG00000011257	Pabpc4	606.809	819.116	481.166	908.492	1969.61	803.98	894.828	1422.77	704.22	1188.17	1717.07	968.89	940.224	1809.56	938.607	939.229	1657.11	1177.51	928.913	1928.65	986.372	785.27	1554.99	724.197	978.678	1951.63	1636.79
ENSMUSG00000011263	Exoc3l2	79.6859	21.735	148.541	53.9529	30.9236	29.2948	22.7089	31.1705	33.2282	18.1446	20.5854	36.2615	29.1712	36.6188	91.4143	19.4833	15.4339	36.2613	18.7699	19.217	30.5665	15.8406	25.4544	111.39	14.9269	18.616	32.1858
ENSMUSG00000011267	Zfp296	72.4394	122.592	75.3206	85.1454	122.151	103.661	112.368	113.443	101.695	68.5475	107.074	114.562	122.634	96.615	122.958	61.2905	95.1729	168.982	99.9307	126.635	223.293	143.474	100.236	125.904	82.0426	105.925	109.046
ENSMUSG00000011305	Plin5	30.927	36.3702	21.8734	30.0549	35.3963	16.1637	19.6336	31.1705	13.9743	16.7707	32.4353	31.6146	26.7514	39.2283	30.788	27.5097	38.8647	21.6925	28.9298	33.7523	22.4343	13.8391	44.1218	30.1649	22.0715	29.6983	25.957
ENSMUSG00000011306	Sugp1	269.814	243.59	236.249	272.665	249.385	284.935	308.05	267.94	301.738	319.316	257.235	301.947	316.518	253.987	275.702	238.335	262.206	276.701	262.63	240.144	309.933	349.558	288.164	296.748	249.617	334.13	236.959
ENSMUSG00000011382	Dhdh	76.5831	71.8629	136.386	97.864	87.2401	114.946	118.399	104.006	120.504	36.6706	92.2389	74.8229	45.1649	80.6168	100.59	39.8454	43.025	82.3749	49.0318	56.205	110.47	63.4132	110.734	97.7027	42.5703	48.1675	50.8893
ENSMUSG00000011427	Zfp790	99.2628	87.0439	127.028	86.0554	83.8027	189.63	89.3981	133.996	197.785	99.6215	84.8016	94.2042	93.8543	80.6168	106.698	86.0738	105.057	120.977	94.6808	117.613	143.492	162.252	114.548	169.339	157.665	155.783	168.684
ENSMUSG00000011486	Slc25a41	9.93761	15.7325	9.93761	13.4068	14.3493	9.93761	16.1572	13.3017	9.93761	9.93761	13.4515	13.7596	9.93761	18.0487	9.93761	13.4898	17.0031	14.7908	9.93761	15.9075	9.93761	9.93761	16.853	17.6805	9.93761	9.93761	9.93761
ENSMUSG00000011589	Fsd1	49.4194	45.4506	23.0307	48.3548	36.8637	26.5477	58.8991	25.3362	25.3005	28.4708	36.4418	32.788	38.4418	35.3033	31.9094	114.419	53.2524	39.681	121.928	45.7202	34.9495	44.0295	40.1147	22.2107	53.0339	46.0504	23.332
ENSMUSG00000011632	Pinlyp	21.3559	21.735	16.7818	17.9706	17.6806	14.8024	14.0368	16.4093	16.057	13.4737	26.2037	17.377	13.7495	21.3178	17.1389	16.8046	22.2966	16.1484	24.0875	22.1349	26.025	13.8391	20.8034	23.2588	14.9269	18.616	9.93761
ENSMUSG00000011658	Fuz	222.932	213.65	221.333	264.575	184.138	275.33	382.331	258.568	273.719	305.382	179.964	215.823	257.266	205.294	246.41	331.988	177.863	175.374	300.082	164.902	225.286	378.177	238.908	217.789	221.216	104.904	111.261
ENSMUSG00000011751	Sptbn4	25.0979	23.0641	52.4173	19.2276	22.2108	76.9492	29.7202	21.1647	57.8136	19.4336	15.2244	80.2199	21.6556	18.0487	57.493	21.9168	22.2966	67.7847	18.7699	17.6362	88.3685	20.5748	23.1823	83.114	24.119	19.9927	43.9942
ENSMUSG00000011752	Pgam1	87.9422	49.9138	95.1328	190.819	143.976	254.516	208.54	157.93	252.699	518.031	186.409	293.445	450.822	189.458	269.642	295.472	142.493	264.742	260.549	155.906	259.154	377.076	149.748	276.378	338.106	202.454	421.688
ENSMUSG00000011831	Evi5	802.209	478.581	721.286	1030.59	504.583	1181.34	894.828	542.934	1007.44	991.411	524.548	1010.3	745.75	437.62	793.349	1121.64	713.605	894.028	1121.15	612.3	1056.98	1492.56	456.659	964.136	1140.46	808.658	1261.09
ENSMUSG00000011832	Evi5l	160.693	208.302	280.044	173.712	241.233	379.352	220.536	221.068	349.592	101.496	149.561	360.391	164.052	191.895	344.358	134.189	233.779	271.918	129.247	231.166	274.092	184.322	227.536	309.477	140.914	186.229	184.112
ENSMUSG00000011837	Snapc2	109.531	140.839	125.156	82.4138	109.169	146.307	141.278	143.403	173.227	151.932	163.386	131.66	136.454	182.147	131.077	84.1772	95.1729	112.154	79.9422	137.9	101.44	152.313	119.312	153.171	61.632	95.7111	89.0698
ENSMUSG00000011877	Git1	627.165	742.262	1073.04	868.989	807.128	871.94	992.999	762.493	773.031	589.511	644.832	566.451	636.879	796.156	941.633	600.569	819.318	890.842	468.522	924.891	817.296	700.564	725.371	762.351	633.418	989.724	721.673
ENSMUSG00000011884	Gltp	332.968	103.23	425.313	278.957	118.054	212.87	274.493	170.739	258.538	343.466	115.402	183.894	332.384	94.1583	326.188	243.02	37.8155	189.748	184.545	63.1187	162.467	308.825	77.2417	217.789	254.627	60.7285	131.168
ENSMUSG00000011958	Bnip2	875.479	600.288	814.346	811.528	617.198	915.913	539.223	434.838	774.197	1101.86	532.812	934.913	790.142	508.123	779.226	961.68	789.954	884.472	896.7	595.493	933.661	620.254	538.984	825.94	1087.09	963.425	1294.05
ENSMUSG00000011960	Ccnt1	1075.95	1132.92	997.664	1085.36	1372.79	930.304	957.083	1009.26	724.047	773.299	1042.35	779.891	702.413	1099.95	891.197	1183.38	1661.03	1369.42	967.361	1517.52	1097.76	1072.37	1359.18	847.984	1388.95	2266.19	2253.06
ENSMUSG00000012017	Scarf2	130.023	42.0745	475.581	234.904	76.2255	645.665	351.184	103.147	701.888	69.4952	27.2688	444.314	164.052	39.2283	536.095	167.071	37.8155	379.512	140.739	30.0289	516.905	154.522	44.1218	435.881	95.554	18.616	242.461
ENSMUSG00000012042	4930579F01Rik	13.6667	9.93761	13.479	9.93761	18.6488	9.93761	16.1572	9.93761	16.057	19.4336	15.2244	13.7596	18.8684	18.0487	9.93761	13.4898	18.432	16.1484	20.1755	13.8809	18.5208	13.8391	9.93761	9.93761	14.9269	13.6537	19.0982
ENSMUSG00000012076	Brms1l	163.757	148.345	155.082	131.336	147.383	244.107	129.242	95.412	204.799	167.77	121.873	194.54	165.113	108.88	187.786	171.764	242.602	208.108	159.524	152.532	193.392	155.626	144.997	205.895	201.159	222.727	235.859
ENSMUSG00000012114	Med15	809.333	654.731	725.009	822.302	695.886	688.843	911.589	707.181	780.029	832.701	648.505	571.761	850.387	669.769	773.173	1121.64	874.131	675.824	889.425	831.902	639.257	891.974	592.916	613.968	848.586	695.36	482.134
ENSMUSG00000012117	Dhdds	216.815	269.242	195.222	227.709	248.705	259.319	312.843	263.68	320.414	248.699	255.396	228.589	229.744	257.638	235.296	234.587	243.583	198.53	245.981	280.53	217.315	295.612	238.908	208.444	309.729	197.384	156.556
ENSMUSG00000012123	Aim1l	30.927	57.65	42.6833	49.2913	65.1544	20.7004	46.4804	52.0083	28.0102	29.5224	50.0288	20.3245	35.0205	50.7345	33.0223	29.6382	63.3342	35.3987	33.5566	50.4017	30.5665	38.1869	50.0627	25.2962	33.6139	67.982	28.4926
ENSMUSG00000012126	Ubxn11	168.863	108.614	200.818	143.97	80.3613	94.7778	170.126	110.871	149.816	115.534	77.3459	89.9075	109.859	79.3827	121.943	130.426	52.2377	95.277	134.472	57.3606	94.4067	142.369	96.4136	100.272	119.106	60.7285	82.389
ENSMUSG00000012187	Mogat1	17.1791	9.93761	13.479	9.93761	9.93761	16.1637	9.93761	16.4093	9.93761	20.6643	16.7239	20.3245	13.7495	14.0727	17.1389	9.93761	9.93761	16.1484	9.93761	9.93761	9.93761	13.8391	15.3213	14.9767	14.9269	9.93761	13.8362
ENSMUSG00000012211	Tex22	15.5658	9.93761	9.93761	16.6298	15.565	9.93761	14.0368	14.9877	9.93761	9.93761	9.93761	13.7596	17.3553	9.93761	13.6478	18.1865	13.5837	13.1767	15.6382	15.9075	13.6175	13.8391	13.5127	13.2947	17.5991	9.93761	13.8362
ENSMUSG00000012282	Wnt8a	13.6667	17.4019	13.479	9.93761	12.8948	13.1841	9.93761	13.3017	16.057	13.4737	9.93761	9.93761	13.7495	9.93761	15.5357	15.2849	9.93761	9.93761	15.6382	13.8809	13.6175	9.93761	16.853	13.2947	14.9269	13.6537	13.8362
ENSMUSG00000012296	Tjap1	206.617	256.417	240.909	273.564	274.514	259.319	275.691	213.394	281.892	143.542	234.249	209.439	157.687	262.505	265.602	209.281	318.055	214.492	181.418	379.199	264.134	105.833	250.277	216.939	242.935	291.608	225.954
ENSMUSG00000012350	Ehf	663.803	2867.23	334.998	961.463	3200.54	208.063	778.695	3204.38	311.076	1189.1	3899.02	478.302	896.891	3323.51	560.31	2089.78	2256.07	388.276	1742.52	3548.48	447.264	635.656	3293.56	148.062	2644.73	3143.1	280.964
ENSMUSG00000012396	Nanog	13.6667	9.93761	16.7818	9.93761	9.93761	19.6446	9.93761	9.93761	23.9069	9.93761	13.4515	9.93761	9.93761	14.0727	13.6478	9.93761	9.93761	13.1767	9.93761	9.93761	18.5208	9.93761	9.93761	17.6805	9.93761	9.93761	9.93761
ENSMUSG00000012405	Rpl15	403.227	399.565	418.796	1500.12	1467.74	1570.68	1398.84	1853.29	1848.23	2630.35	2697.44	2124.02	1927.31	2121.83	1598.28	1516.39	1469.2	1278.64	1405.86	1934.25	1644.73	2092.01	1473.64	1393.96	1415.64	1850.49	2156.39
ENSMUSG00000012422	Tmem167	389.992	333.347	402.038	358.033	322.04	362.552	298.463	288.385	299.403	515.246	393.221	286.004	387.379	329.408	320.13	396.576	617.675	364.373	425.901	440.847	318.892	399.088	308.05	334.085	556.684	650.848	510.707
ENSMUSG00000012428	Steap4	641.413	941.864	1726.24	782.797	1431.11	1196.53	787.076	3024.86	1535.71	575.587	1903.41	1063.39	338.731	1277.35	1377.38	456.472	1774.55	1231.66	260.549	1287.87	894.873	196.454	1360.12	855.615	3565.29	5869.89	2550.76
ENSMUSG00000012429	Mplkip	179.071	216.859	151.344	162	185.499	163.165	125.629	168.178	170.887	159.386	199.294	163.656	131.141	173.615	158.439	191.466	292.583	147.399	224.122	221.065	168.455	161.148	199.098	171.04	231.241	264.264	252.364
ENSMUSG00000012443	Kif11	230.068	230.76	125.156	86.9651	109.169	104.467	66.268	128.006	70.9568	472.539	387.71	111.352	338.731	303.867	151.35	156.743	60.3203	66.1564	154.308	117.613	76.2578	150.104	102.146	72.7724	196.144	127.321	75.692
ENSMUSG00000012483	Rpa3	94.1209	105.384	83.8276	113.262	62.3741	81.0107	122.014	75.5719	95.8053	216.158	166.15	111.352	114.12	100.298	88.351	113.476	56.2884	48.078	128.202	51.5661	59.9957	157.835	84.9244	81.3934	82.0426	50.2763	55.4426
ENSMUSG00000012519	Mlkl	190.296	133.329	145.737	142.166	76.9154	102.047	96.6636	82.4879	70.9568	320.245	164.307	86.6816	295.36	165.081	157.426	159.56	109.993	132.994	113.557	100.669	81.3104	130.205	86.8419	80.5327	301.382	400.933	154.35
ENSMUSG00000012535	Tnpo3	841.897	918.382	754.788	745.985	1115.74	934.302	749.96	936.931	796.356	1085.15	1066.22	963.581	915.915	923.751	873.04	895.262	1417.33	1019.05	856.172	1216.17	941.617	919.474	982.687	874.267	1075.41	1736.19	1269.88
ENSMUSG00000012609	Ttll5	608.845	555.451	318.235	476.599	566.998	332.95	542.816	447.606	333.253	531.028	517.202	464.495	706.641	530.002	374.64	607.119	613.76	328.513	877.995	391.53	303.96	380.378	461.39	326.448	513.31	391.825	313.956
ENSMUSG00000012640	Zfp715	212.736	287.408	287.497	202.519	314.573	252.914	159.313	239.82	212.98	159.386	272.862	211.567	194.793	266.155	248.43	267.376	488.45	335.685	296.961	374.715	305.951	239.44	334.56	328.145	252.957	518.313	488.728
ENSMUSG00000012705	Retn	9.93761	13.7713	21.8734	15.1536	12.8948	17.3959	14.0368	13.3017	13.9743	13.4737	9.93761	9.93761	13.7495	16.2148	13.6478	9.93761	15.4339	13.1767	15.6382	15.9075	18.5208	9.93761	16.853	16.3947	17.5991	19.9927	20.5657
ENSMUSG00000012777	Acpt	58.8985	105.384	74.3735	69.6259	133.75	76.9492	71.1588	79.8967	57.8136	70.4423	142.183	97.4238	47.3807	130.904	100.59	47.738	173.935	147.399	61.9192	153.657	119.487	56.6273	125.025	101.128	51.3035	147.656	114.582
ENSMUSG00000012819	Cdh23	70.3642	37.5207	278.181	26.9885	51.8811	101.24	25.5931	35.8371	67.3848	32.6245	32.4353	104.928	45.1649	51.9968	163.501	21.9168	55.2777	147.399	24.0875	31.2807	101.44	25.9718	48.09	192.297	35.4323	26.2234	93.5165
ENSMUSG00000012848	Rps5	3776.46	5167.14	4048.64	3002.01	3494.88	3283.06	3145.41	5098.27	5250.86	4693.36	6297.58	4382.18	4449.87	5333.19	3851.53	2930.68	4362.16	2592.46	2767.01	6612.24	3704.25	4011.34	4121.22	2908.03	3186.73	4166.66	3949.15
ENSMUSG00000012889	Podnl1	23.8796	24.3589	28.5065	22.7079	27.0793	24.6649	29.7202	24.323	22.4783	18.1446	24.0262	29.2373	22.9741	19.73	25.0028	30.6875	25.84	16.1484	30.1018	22.1349	24.8513	17.5467	26.562	23.2588	24.119	21.3093	23.332
ENSMUSG00000013033	Adgrl1	159.672	136.548	517.467	207.918	132.386	622.477	212.139	140.838	432.437	114.599	96.8799	626.982	153.442	162.642	707.602	144.53	101.106	647.153	83.1063	101.8	798.399	168.875	105.965	728.436	154.316	105.925	472.244
ENSMUSG00000013076	Amotl1	1946.97	1874.68	2674.37	1024.31	2418.58	6685.39	923.561	1976.66	5693.97	1633.64	1740.02	5268.66	1468.65	2246.98	3965.5	497.646	3587.06	4709.66	275.116	2529.09	5802.53	559.743	1974.97	4885.79	1320.57	3999.78	4163.35
ENSMUSG00000013089	Etv5	132.07	138.694	309.852	115.976	135.796	572.899	153.304	193.779	542.094	128.614	293.081	873.33	125.825	236.949	687.426	105.931	106.045	259.16	90.4762	210.961	317.897	89.1603	306.156	351.902	127.499	160.86	455.759
ENSMUSG00000013091	Tmem190	29.7873	47.687	21.8734	30.0549	44.7982	20.7004	36.3085	36.7568	17.8368	19.4336	35.4479	43.0615	26.7514	58.2766	26.1906	30.6875	63.3342	41.3753	30.1018	46.8945	26.025	17.5467	37.0752	21.1371	33.6139	87.5232	38.1585
ENSMUSG00000013150	Gfod2	72.4394	63.135	63.9216	94.2343	53.2877	58.9708	105.125	72.1059	69.767	60.9436	50.9837	61.8051	81.006	76.9127	52.2787	88.9165	91.2132	68.5982	107.271	75.7009	55.8972	109.161	73.391	59.7611	145.941	106.945	94.6274
ENSMUSG00000013155	Enkd1	37.5986	49.9138	45.6237	35.0084	32.4281	54.0208	63.8166	48.4663	68.5763	50.3963	44.2641	57.4369	58.34	55.7704	54.3685	52.6063	39.9099	52.2221	45.7712	32.5214	44.5062	44.0295	36.0538	53.6384	40.8021	33.0718	29.736
ENSMUSG00000013158	4933405L10Rik	17.1791	23.0641	18.1584	9.93761	17.6806	20.7004	25.5931	18.9056	23.9069	21.852	20.5854	15.7139	21.6556	28.5687	22.5575	25.33	29.2178	21.6925	32.4138	30.0289	15.4877	15.8406	24.329	26.2917	35.4323	19.9927	17.5405
ENSMUSG00000013160	Atp6v0d1	577.294	428.397	609.609	490.968	369.553	459.339	624.241	576.977	580.587	708.326	501.591	428.381	555.484	444.914	485.646	550.045	262.206	435.281	543.36	346.689	420.4	766.569	417.857	419.765	576.702	324.007	423.886
ENSMUSG00000013236	Ptprs	3527.17	1404.01	3971.41	851.93	873.6	6204.94	721.225	913.956	4889.38	2351.02	1243.4	7725.33	1423.21	1106.02	6018.02	735.291	466.911	4454.07	542.321	745.633	6753.22	491.525	685.635	5428.33	1328.91	671.081	3916.19
ENSMUSG00000013275	Slc41a1	316.673	1148.93	711.05	762.146	2074.73	1234.11	751.158	1917.1	986.45	240.333	1090.09	932.79	277.373	1232.4	944.659	317.008	1340.99	1165.57	220.999	1844.63	1054.99	356.163	1592.82	726.74	288.026	1481.31	1146.84
ENSMUSG00000013338	Fer1l4	904.99	172.987	146.672	677.746	100.273	63.0769	887.645	148.532	104.049	1029.46	88.5223	62.8944	1267.85	54.5146	104.663	1182.44	75.3264	54.6964	1366.38	50.4017	52.8107	1249.47	130.734	126.757	898.622	36.3774	38.1585
ENSMUSG00000013367	Iglon5	18.65	9.93761	92.3098	52.0921	22.2108	136.667	41.4333	25.3362	80.4496	18.1446	20.5854	70.4953	20.2925	14.0727	95.4948	18.1865	17.0031	62.894	15.6382	15.9075	77.2692	15.8406	15.3213	71.9084	22.0715	18.616	47.4533
ENSMUSG00000013415	Igf2bp1	15.5658	17.4019	15.2679	15.1536	12.8948	9.93761	22.7089	14.9877	13.9743	13.4737	15.2244	9.93761	13.7495	22.842	9.93761	13.4898	23.5026	14.7908	13.7122	23.5173	9.93761	13.8391	16.853	9.93761	19.9208	25.0329	15.836
ENSMUSG00000013418	B4galnt2	17.1791	18.9262	16.7818	13.4068	14.3493	16.1637	21.2029	14.9877	17.8368	13.4737	9.93761	15.7139	9.93761	14.0727	15.5357	18.1865	17.0031	18.5256	13.7122	13.8809	15.4877	13.8391	15.3213	23.2588	9.93761	13.6537	19.0982
ENSMUSG00000013419	Zfp651	183.153	225.414	311.715	180.916	184.819	531.316	233.729	142.548	484.935	77.0588	133.879	403.949	137.516	204.076	375.649	154.865	187.678	322.934	206.421	135.648	462.188	79.1208	136.441	390.925	186.111	103.884	186.316
ENSMUSG00000013465	Nelfb	424.607	444.414	415.072	327.486	368.195	459.339	472.161	456.97	512.932	417.759	319.729	359.329	405.356	407.227	421.064	379.729	368.009	337.279	392.633	385.925	453.234	527.835	417.857	450.299	419.878	390.813	306.259
ENSMUSG00000013483	Card14	86.9114	224.345	84.7711	134.947	215.413	81.8222	129.242	249.195	73.334	89.2987	149.561	68.3275	99.1948	300.218	109.75	239.272	70.3401	62.0771	261.59	108.582	88.3685	208.582	265.434	92.5602	63.343	55.5189	40.5054
ENSMUSG00000013495	Tmem175	187.235	212.581	253.956	206.118	212.694	272.128	246.92	278.163	281.892	214.298	214.935	248.795	212.802	201.64	233.276	182.085	188.66	206.512	215.793	150.282	230.268	238.338	206.683	286.563	139.237	102.863	154.35
ENSMUSG00000013523	Bcas1	62.0358	34.0508	57.2278	42.698	23.051	72.0658	22.7089	18.9056	88.7266	103.37	29.3629	71.5781	62.6845	25.7621	48.0793	99.3219	21.0573	32.7879	54.4265	20.707	46.5945	54.3546	25.4544	57.1422	56.483	21.3093	33.3954
ENSMUSG00000013539	Tango2	74.5123	65.3218	80.0503	85.1454	57.4923	80.1989	103.917	88.5251	69.767	77.0588	47.1547	53.0481	76.7106	57.0244	54.3685	116.304	58.3065	45.5765	127.157	48.0661	44.5062	95.8368	59.844	76.2248	147.616	50.2763	42.835
ENSMUSG00000013584	Aldh1a2	23.8796	17.4019	30.6049	17.9706	18.6488	23.703	9.93761	31.1705	26.6665	15.2595	16.7239	23.016	18.8684	18.0487	26.1906	13.4898	21.0573	28.3332	15.6382	15.9075	21.1789	15.8406	9.93761	21.1371	22.0715	23.8208	40.5054
ENSMUSG00000013593	Ndufs2	628.182	471.107	767.817	666.971	430.627	720.027	705.66	611.019	843.006	868.899	680.639	787.324	611.51	641.817	755.016	685.707	304.34	698.123	558.951	464.382	693.964	795.171	413.125	556.306	560.021	404.981	644.763
ENSMUSG00000013611	Snx31	15.5658	17.4019	9.93761	9.93761	21.3542	9.93761	16.1572	14.9877	9.93761	13.4737	21.7629	23.016	9.93761	21.3178	22.5575	15.2849	28.1053	20.6714	18.7699	20.707	23.6561	9.93761	23.1823	21.1371	14.9269	26.2234	28.4926
ENSMUSG00000013622	Atraid	217.834	280.997	340.585	331.08	279.267	402.55	390.716	359.069	496.601	310.955	424.449	410.322	269.966	344.001	317.101	258.946	259.266	252.781	279.277	324.265	380.598	374.875	308.05	348.508	154.316	214.619	278.764
ENSMUSG00000013629	Cad	1166.51	498.867	619.847	1015.33	342.404	937.5	1285.11	617.827	869.83	1420.19	453.838	607.868	1546.86	591.988	741.901	1318.08	355.277	563.526	954.891	385.925	655.172	1512.35	470.853	621.6	1200.5	408.017	472.244
ENSMUSG00000013643	Lypd8	13.6667	9.93761	9.93761	17.9706	12.8948	9.93761	14.0368	13.3017	9.93761	19.4336	9.93761	17.377	13.7495	9.93761	9.93761	13.4898	9.93761	13.1767	15.6382	13.8809	9.93761	9.93761	9.93761	9.93761	17.5991	9.93761	15.836
ENSMUSG00000013646	Sh3bp5l	232.107	220.067	141.997	162.901	276.551	142.291	148.494	259.42	149.816	188.25	166.15	126.32	191.615	285.621	162.489	282.362	479.639	179.367	306.323	337.72	173.444	190.94	260.698	159.129	369.817	300.721	164.275
ENSMUSG00000013653	1810065E05Rik	13.6667	23.0641	9.93761	13.4068	18.6488	9.93761	14.0368	9.93761	9.93761	9.93761	36.4418	15.7139	9.93761	27.1766	13.6478	9.93761	9.93761	9.93761	9.93761	13.8809	9.93761	9.93761	16.853	9.93761	9.93761	17.1517	13.8362
ENSMUSG00000013662	Atad1	771.679	703.834	634.737	864.499	687.746	812.775	866.095	826.313	780.029	1268.91	1015.73	849.971	821.85	705.012	706.594	1040.26	917.197	592.996	954.891	980.907	773.534	1204.37	699.827	630.079	945.322	1269.91	1266.58
ENSMUSG00000013663	Pten	2168.79	1370.93	2487.35	1799.97	1570.83	3053.63	1462.29	1562.31	2098.94	3622.42	1807.95	2249.3	2404.98	1519.16	2239.76	1821.32	1382.1	2306.61	1646.92	1566.81	2321.96	2469.28	1361.07	2024.69	2264.5	1867.68	2819.89
ENSMUSG00000013698	Pea15a	485.686	399.565	976.261	632.85	475.409	700.837	569.16	526.764	537.428	415.902	326.161	289.193	408.528	368.321	537.104	521.039	444.391	526.888	465.403	467.745	432.34	419.999	458.551	435.033	413.204	442.424	468.947
ENSMUSG00000013701	Timm23	146.388	200.814	111.099	297.832	366.838	211.268	258.909	321.602	207.136	376.9	456.593	310.45	306.997	344.001	229.234	204.594	538.381	283.876	269.914	503.606	270.109	300.017	313.731	186.347	234.582	562.831	487.629
ENSMUSG00000013707	Tnfaip8l2	39.7775	21.735	46.5995	30.0549	18.6488	18.5479	9.93761	30.2201	26.6665	18.1446	15.2244	17.377	50.687	22.842	41.7142	15.2849	17.0031	31.9087	9.93761	17.6362	24.8513	19.1059	20.8034	33.9181	17.5991	13.6537	19.0982
ENSMUSG00000013736	Trnt1	1662.06	654.731	534.221	441.572	393.984	411.349	320.033	363.326	396.268	2228.52	620.96	468.743	1671.56	421.816	468.492	1582.8	586.35	503.788	1120.11	577.564	463.183	1076.77	461.39	457.932	1373.94	706.488	796.383
ENSMUSG00000013766	Ly6g6e	90.0029	52.1325	24.1619	59.5101	39.7724	21.7248	62.5892	58.1649	22.4783	103.37	61.4098	21.6926	123.698	35.3033	28.5152	161.438	33.5707	14.7908	168.91	40.9902	22.4343	196.454	45.1171	30.1649	102.293	13.6537	15.836
ENSMUSG00000013787	Ehmt2	1296.76	1008.04	1075.83	873.478	793.562	1001.46	1083.99	1146.25	1069.25	1656.84	990.945	917.925	1640.91	1153.41	1112.1	1152.51	438.516	742.721	1099.33	695.214	996.317	1839.03	1017.69	1056.55	901.958	444.448	365.629
ENSMUSG00000013822	Elof1	141.276	162.277	141.062	138.557	105.749	127.019	186.938	184.395	205.968	206.858	225.972	158.328	185.256	189.458	128.033	161.438	151.342	93.6667	153.265	187.378	104.452	150.104	136.441	139.544	201.159	185.214	89.0698
ENSMUSG00000013833	Med16	245.358	279.928	312.646	296.034	341.725	388.952	484.137	422.92	461.603	334.178	332.592	359.329	319.691	368.321	337.292	317.008	318.055	250.388	252.225	445.33	339.795	324.239	316.572	317.963	264.648	256.161	170.889
ENSMUSG00000013846	St3gal1	1174.65	748.667	1409.88	1643.76	1210.01	823.968	1538.9	736.113	831.344	1443.39	440.062	744.851	1203.38	571.326	1108.07	2623.88	1422.22	1655.28	2677.66	1316.99	1164.39	2306.49	528.575	814.918	1507.36	1928.37	1882.86
ENSMUSG00000013858	Tmem259	602.738	553.316	645.905	622.973	680.284	694.44	994.196	681.652	735.71	745.453	625.551	649.282	783.8	813.169	832.69	708.161	609.844	627.243	668.077	679.528	682.028	878.774	677.121	601.249	603.392	579.018	561.255
ENSMUSG00000013878	Rnf170	104.399	122.592	77.2136	121.4	117.371	145.504	128.038	108.297	128.719	149.136	129.263	142.333	111.99	118.676	100.59	158.621	124.779	108.14	163.696	158.156	141.494	162.252	156.397	148.914	154.316	123.25	121.22
ENSMUSG00000013921	Clip3	86.9114	25.6267	496.059	116.88	61.678	1080.61	105.125	50.2399	928.14	39.6574	26.2037	659.901	76.7106	32.6455	624.879	31.7284	24.682	558.748	21.5204	20.707	925.704	24.6715	19.5543	890.376	47.8283	18.616	266.665
ENSMUSG00000013928	Thap8	20.0331	18.9262	21.8734	22.7079	19.5784	22.7241	14.0368	21.1647	23.9069	18.1446	21.7629	9.93761	24.2585	29.9424	28.5152	20.7215	17.0031	26.4995	24.0875	13.8809	22.4343	19.1059	16.853	21.1371	26.097	13.6537	23.332
ENSMUSG00000013936	Myl2	9.93761	9.93761	9.93761	9.93761	9.93761	13.1841	9.93761	9.93761	13.9743	9.93761	13.4515	15.7139	9.93761	9.93761	9.93761	13.4898	9.93761	13.1767	13.7122	13.8809	13.6175	13.8391	9.93761	9.93761	9.93761	13.6537	9.93761
ENSMUSG00000013973	Dedd	271.852	272.448	282.839	293.338	290.131	344.951	263.704	267.94	294.734	298.878	225.053	240.288	300.65	284.405	247.42	316.072	308.259	269.526	273.035	270.435	288.031	397.988	312.784	312.872	376.492	361.461	266.665
ENSMUSG00000013974	Mcemp1	28.6366	17.4019	35.7191	17.9706	18.6488	13.1841	9.93761	14.9877	13.9743	13.4737	9.93761	13.7596	17.3553	16.2148	18.6002	13.4898	18.432	16.1484	13.7122	13.8809	17.0748	9.93761	16.853	13.2947	9.93761	9.93761	13.8362
ENSMUSG00000013997	Nit1	385.919	349.369	321.96	437.081	374.303	455.34	441.022	377.8	426.604	492.964	339.023	322.139	429.675	354.945	308.015	481.738	333.729	328.513	423.822	317.538	377.612	691.763	403.661	366.324	418.21	371.583	285.364
ENSMUSG00000014030	Pax5	322.784	65.3218	405.762	38.8801	24.6922	13.1841	14.0368	18.9056	13.9743	9.93761	9.93761	13.7596	17.3553	9.93761	17.1389	9.93761	15.4339	14.7908	9.93761	13.8809	15.4877	13.8391	13.5127	31.1123	14.9269	17.1517	20.5657
ENSMUSG00000014039	Prdm15	168.863	196.534	193.356	171.91	213.374	229.692	201.34	224.478	212.98	159.386	178.123	174.31	215.979	191.895	180.705	157.682	233.779	221.673	159.524	173.895	224.29	193.146	216.163	205.895	284.686	350.327	252.364
ENSMUSG00000014074	Rnf168	155.585	223.275	203.616	274.463	224.247	272.928	226.534	248.342	258.538	231.036	320.648	244.542	221.274	244.252	192.843	284.235	255.345	197.732	277.196	329.872	238.238	286.803	250.277	206.744	229.57	266.29	290.863
ENSMUSG00000014075	Tctex1d2	35.4005	31.7013	70.5804	64.1178	41.2157	72.0658	63.8166	41.3068	61.4119	39.6574	30.3951	51.947	29.1712	44.3807	60.6071	58.4048	35.7037	46.4118	33.5566	27.484	69.1639	61.1559	23.1823	62.3735	29.9153	27.3961	50.8893
ENSMUSG00000014077	Chp1	1089.18	1060.34	783.637	1383.41	1288.01	836.761	1207.29	1177.73	905.982	1664.26	1497.68	864.836	1118.84	1430.46	889.179	1766.14	1545.54	1005.51	1502.49	2103.4	1032.12	2023.82	1134.99	767.438	1807.55	2404.76	1637.89
ENSMUSG00000014158	Trpv4	146.388	54.3441	273.523	81.5027	53.99	546.51	60.1306	63.4101	537.428	45.5476	44.2641	414.571	87.4364	49.4697	439.229	44.7961	23.5026	335.685	32.4138	34.9748	405.475	34.6209	36.0538	428.247	47.8283	38.5534	201.735
ENSMUSG00000014164	Klhl3	65.1647	44.3283	60.1017	87.8745	47.6426	67.1694	115.987	66.0242	74.5216	35.6667	31.4189	60.7147	40.6978	29.9424	56.4528	73.7219	31.4111	57.9837	78.8866	34.9748	64.0783	57.7614	44.1218	71.9084	35.4323	23.8208	30.9665
ENSMUSG00000014177	Tvp23b	276.946	256.417	200.818	302.325	255.498	256.918	299.662	326.711	272.551	461.398	349.129	233.907	296.418	275.889	181.717	400.32	227.896	180.965	336.483	291.746	231.264	470.619	295.74	210.143	358.134	253.122	227.055
ENSMUSG00000014195	Dnajc7	709.6	616.301	557.49	793.571	594.133	676.85	819.402	628.89	727.546	1075.87	803.664	706.624	827.134	655.185	654.135	840.068	704.796	627.243	738.745	706.419	688.991	1042.67	696.042	742.002	741.839	1063.56	816.159
ENSMUSG00000014198	Zfp385c	41.9405	30.5128	32.6698	31.0588	23.8775	31.0881	25.5931	23.2926	34.5042	31.5981	30.3951	26.8079	36.1666	27.1766	26.1906	30.6875	31.4111	27.421	28.9298	23.5173	18.5208	28.5101	31.9151	32.9883	26.097	33.0718	24.6581
ENSMUSG00000014226	Cacybp	408.318	377.138	406.693	435.285	346.476	468.937	405.09	413.556	539.761	704.613	684.312	531.405	551.256	447.345	440.238	408.743	526.633	432.095	388.474	529.38	444.279	624.654	400.821	443.514	486.617	1093.91	1114.98
ENSMUSG00000014232	Cluap1	137.185	146.201	129.836	179.115	125.564	171.99	176.132	163.055	174.397	122.076	158.779	142.333	154.504	149.222	130.062	223.341	162.15	102.516	202.255	126.635	131.496	205.275	163.044	163.384	115.746	118.158	110.153
ENSMUSG00000014243	Zswim7	44.0903	45.4506	53.3818	47.4167	60.9816	43.1689	69.9375	49.3538	50.5725	64.751	65.1744	54.1475	60.5144	43.0995	52.2787	53.5756	44.0575	59.6229	56.5734	56.205	46.5945	70.1623	58.8709	47.4649	42.5703	31.9561	55.4426
ENSMUSG00000014245	Pigl	67.2466	62.0402	59.1446	81.5027	58.8895	50.7036	103.917	73.8397	69.767	93.9941	50.9837	35.1106	59.4278	58.2766	57.493	104.988	58.3065	37.9768	106.223	50.4017	46.5945	110.27	74.3544	58.016	46.0824	59.6888	34.5965
ENSMUSG00000014294	Ndufa2	266.757	248.935	271.66	231.306	170.532	186.424	348.788	272.2	361.261	372.257	316.054	246.668	292.186	249.12	205.987	265.503	183.752	139.398	253.265	227.799	226.283	367.17	201.942	174.442	212.86	197.384	169.787
ENSMUSG00000014301	Pam16	46.229	85.9624	59.1446	109.643	140.568	77.7621	106.333	189.514	119.33	112.729	197.453	96.3508	103.463	190.677	97.5337	90.8104	151.342	76.7128	85.2137	120.997	78.2801	110.27	171.587	68.4481	87.1156	100.82	80.1586
ENSMUSG00000014303	Glis2	134.116	349.369	354.553	286.148	371.589	393.751	311.645	409.3	377.598	108.987	330.755	215.823	146.012	404.796	377.668	128.544	425.786	389.87	108.319	401.618	377.612	124.672	425.429	382.442	134.208	436.353	251.263
ENSMUSG00000014313	Cox6c	737.078	640.854	680.339	725.334	468.624	491.33	575.147	602.508	703.054	1243.85	904.65	674.768	851.444	636.956	522.979	866.262	536.423	448.824	796.94	617.903	650.199	911.774	510.597	484.224	720.155	537.537	805.173
ENSMUSG00000014329	Bicc1	194.377	37.5207	749.205	543.952	122.151	564.103	407.486	113.443	581.753	246.84	34.4492	348.704	295.36	53.2568	597.639	168.01	43.025	584.235	80.9973	24.8652	546.748	127.992	30.8638	405.346	232.912	25.0329	492.025
ENSMUSG00000014349	Ube2z	903.973	1040.06	660.796	801.651	1093.36	868.742	866.095	988.835	827.845	1176.1	1038.68	858.465	869.411	1137.62	804.445	1191.8	1410.48	828.728	932.03	1636.27	848.128	1065.77	1026.2	734.371	1303.9	1635.05	1118.28
ENSMUSG00000014351	Gip	17.1791	13.7713	9.93761	15.1536	15.565	9.93761	9.93761	9.93761	9.93761	9.93761	16.7239	9.93761	13.7495	18.0487	13.6478	15.2849	19.7744	14.7908	9.93761	15.9075	13.6175	9.93761	18.2464	9.93761	9.93761	17.1517	17.5405
ENSMUSG00000014353	Tmem87b	741.149	907.708	790.151	842.054	1137.44	1013.45	687.701	810.996	823.18	800.216	959.732	1025.16	614.681	858.131	739.884	1029.03	1179.5	1015.86	1099.33	1039.16	952.557	652.158	872.952	791.178	990.353	894.64	964.474
ENSMUSG00000014355	Anapc1	1759.74	1296.22	1758.8	1502.81	1216.79	2282.18	1637.07	1551.25	2016.14	2030.84	1331.52	1935.04	1836.42	1304.09	1603.32	1604.31	1128.61	1487.26	1606.4	1288.99	2042.52	1875.33	1350.66	1956.02	1720.83	1258.78	1529.14
ENSMUSG00000014361	Mertk	239.242	129.035	319.166	134.044	127.611	174.396	58.8991	102.288	148.645	83.656	128.339	152.998	164.052	133.348	223.17	50.6636	117.882	226.459	57.6449	140.152	195.386	40.5366	105.965	237.324	80.3495	72.1108	114.582
ENSMUSG00000014402	Tsg101	520.295	388.886	303.332	586.157	382.447	358.552	633.82	453.565	378.765	1242.92	533.731	364.641	799.654	461.933	369.593	1127.25	578.518	324.528	1110.76	540.586	327.851	1037.17	412.179	350.205	861.929	774.265	487.629
ENSMUSG00000014418	Hps5	388.974	321.596	416.003	338.268	347.834	319.347	354.778	433.987	326.25	328.605	318.81	346.579	371.517	345.217	316.092	379.729	338.626	377.122	425.901	364.626	362.685	437.606	359.174	365.476	299.713	317.933	341.443
ENSMUSG00000014426	Map3k4	871.409	551.18	549.113	493.662	554.108	1073.41	676.925	699.522	877.993	1116.7	598.006	829.796	968.76	596.849	703.567	592.149	297.482	679.01	588.052	416.189	868.02	850.173	670.498	770.83	461.591	261.226	351.338
ENSMUSG00000014444	Piezo1	2376.36	6235.45	2565.51	2321.54	11877.3	1498.73	1762.76	6224.73	1169.54	1836.88	3968.78	1285.29	2109.08	7040.31	3265.53	1452.78	11800	3789.21	1743.56	11107.6	2383.62	1278.07	7897.21	1393.12	3576.97	11697.7	3362.55
ENSMUSG00000014453	Blk	72.4394	15.7325	85.7144	17.9706	14.3493	14.8024	9.93761	16.4093	13.9743	9.93761	9.93761	9.93761	9.93761	9.93761	17.1389	15.2849	9.93761	14.7908	9.93761	9.93761	9.93761	9.93761	9.93761	14.9767	17.5991	13.6537	20.5657
ENSMUSG00000014470	Rnf166	205.597	198.674	197.087	183.617	191.619	186.424	269.698	217.658	219.991	179.873	175.36	155.13	143.889	224.776	213.063	174.579	251.424	158.593	143.871	244.632	180.427	207.48	231.327	182.946	139.237	165.936	126.748
ENSMUSG00000014496	Ankrd28	1038.3	1182.01	952.998	1426.51	1587.1	955.089	939.125	842.48	551.426	1164.97	1321.42	1029.41	995.182	1298.01	1136.31	1774.55	2070.12	1777.9	1827.72	1880.48	1047.04	1009.67	1056.47	723.349	1373.94	2304.62	2414.54
ENSMUSG00000014498	Ankrd52	858.179	835.127	822.721	719.048	908.192	1002.26	949.9	739.517	813.85	1138.05	603.515	891.38	1093.47	826.536	1095.96	891.52	1045.41	1177.51	776.156	989.87	1121.63	990.975	921.198	1093	1162.14	1059.52	1080.92
ENSMUSG00000014503	Pkd2l2	217.834	333.347	200.818	278.059	380.411	351.352	203.74	377.8	323.916	239.403	358.316	349.766	210.683	291.704	298.928	279.552	439.495	322.137	261.59	420.672	347.757	181.013	385.677	250.061	429.89	511.231	430.481
ENSMUSG00000014504	Srp19	331.95	227.553	185.892	185.418	205.217	159.955	152.101	133.996	126.373	371.328	276.538	167.918	276.315	233.297	187.786	245.831	279.845	208.108	254.306	235.655	197.38	237.236	212.371	176.994	261.308	346.278	345.841
ENSMUSG00000014529	Tmbim7	21.3559	30.5128	19.45	13.4068	23.8775	13.1841	16.1572	16.4093	9.93761	23.0069	24.0262	24.3053	20.2925	21.3178	15.5357	21.9168	33.5707	22.6886	32.4138	23.5173	17.0748	9.93761	23.1823	17.6805	31.7763	29.6983	23.332
ENSMUSG00000014543	Klra17	25.0979	17.4019	32.6698	21.5836	17.6806	9.93761	17.9712	32.1145	21.0038	9.93761	9.93761	9.93761	9.93761	14.0727	9.93761	13.4898	15.4339	9.93761	9.93761	9.93761	17.0748	9.93761	16.853	16.3947	14.9269	9.93761	9.93761
ENSMUSG00000014547	Wdfy2	397.119	326.938	257.683	198.019	362.087	189.63	263.704	501.23	188.432	568.16	271.943	181.765	536.456	335.489	240.348	359.136	146.426	195.337	342.723	214.329	173.444	329.744	354.441	204.195	706.811	226.78	135.587
ENSMUSG00000014550	Rbsn	325.839	380.342	382.487	412.83	427.235	478.534	387.123	462.928	434.77	376.9	451.083	425.194	328.154	390.206	338.302	357.264	396.41	373.934	328.164	455.417	416.42	413.395	397.982	368.021	346.451	390.813	457.957
ENSMUSG00000014551	Mrps25	459.22	580.005	457.895	464.923	472.017	474.535	490.125	424.623	399.768	459.541	426.286	436.878	401.126	436.404	380.695	574.372	772.336	455.994	589.092	613.421	444.279	470.619	444.356	494.4	613.401	663.999	562.353
ENSMUSG00000014554	Dguok	132.07	104.307	138.257	143.97	83.8027	173.594	224.135	141.693	201.292	149.136	99.6621	107.07	153.442	79.3827	123.973	179.271	56.2884	69.4113	239.736	53.8891	126.494	217.4	119.312	148.062	98.9246	57.6061	45.1502
ENSMUSG00000014592	Camta1	192.337	318.392	451.378	176.413	325.434	1835.3	134.058	206.573	1711.79	112.729	245.283	982.693	121.57	228.428	634.967	127.603	384.658	936.233	161.61	278.287	1355.34	88.0464	273.011	1281.21	122.464	200.426	382.118
ENSMUSG00000014599	Csf1	265.738	410.244	1066.52	556.524	746.081	1349.23	487.73	454.416	1298.98	145.407	260.912	888.195	357.768	731.748	1228.1	346.967	2131.77	1918.84	178.292	1496.23	1240.97	178.806	707.395	889.528	2189.46	4345.68	4468.74
ENSMUSG00000014601	Strip1	285.096	416.651	361.071	377.797	523.58	427.346	520.063	350.554	455.77	336.036	322.486	402.886	345.077	409.659	407.945	378.793	467.89	471.129	357.281	484.555	444.279	382.579	460.444	446.059	329.76	469.746	396.408
ENSMUSG00000014602	Kif1a	68.2865	26.8726	198.02	43.6459	41.935	241.704	53.9573	41.3068	119.33	15.2595	16.7239	446.438	22.9741	22.842	300.947	48.7149	25.84	569.898	36.9435	22.1349	536.801	39.3642	22.0094	295.051	46.0824	26.2234	609.602
ENSMUSG00000014603	Alx3	13.6667	15.7325	9.93761	9.93761	14.3493	9.93761	9.93761	13.3017	17.8368	9.93761	13.4515	15.7139	9.93761	16.2148	13.6478	9.93761	15.4339	13.1767	9.93761	9.93761	9.93761	9.93761	9.93761	13.2947	9.93761	9.93761	9.93761
ENSMUSG00000014606	Slc25a11	364.537	346.165	299.607	400.255	316.609	383.352	581.134	553.147	502.433	539.383	418.02	366.766	422.274	424.248	320.13	459.279	246.523	237.627	432.138	381.441	345.766	689.562	423.536	379.049	308.06	203.468	140.004
ENSMUSG00000014609	Chrne	18.65	21.735	18.1584	21.5836	24.6922	9.93761	17.9712	21.1647	13.9743	13.4737	16.7239	18.8954	17.3553	19.73	19.974	15.2849	21.0573	16.1484	22.8209	15.9075	17.0748	13.8391	22.0094	18.8843	17.5991	17.1517	23.332
ENSMUSG00000014633	Cmc2	56.8016	65.3218	67.7302	32.0554	46.9331	51.5344	48.9831	62.5376	79.2652	90.2383	77.3459	37.4065	81.006	60.7764	53.3243	44.7961	34.6402	36.2613	43.5849	44.5429	57.9487	72.4057	54.9682	54.5158	33.6139	51.328	43.9942
ENSMUSG00000014668	Chfr	324.821	221.137	283.771	236.702	189.579	225.687	268.499	177.568	194.278	460.47	176.281	243.478	420.159	207.73	251.461	359.136	229.857	269.526	414.465	182.885	243.218	433.204	226.589	288.261	299.713	178.113	207.24
ENSMUSG00000014686	Ceacam16	22.6347	20.3612	23.0307	25.9433	29.4019	16.1637	28.3643	21.1647	13.9743	21.852	19.3652	13.7596	18.8684	16.2148	15.5357	39.8454	25.84	20.6714	34.6919	17.6362	21.1789	21.9819	20.8034	17.6805	28.025	17.1517	13.8362
ENSMUSG00000014704	Hoxa2	22.6347	13.7713	29.5605	20.4268	12.8948	19.6446	16.1572	13.3017	19.4663	9.93761	9.93761	15.7139	9.93761	9.93761	25.0028	9.93761	9.93761	23.6643	9.93761	9.93761	19.8798	9.93761	15.3213	29.2102	14.9269	9.93761	19.0982
ENSMUSG00000014725	Adam28	63.0796	28.1004	20.6831	21.5836	9.93761	17.3959	16.1572	13.3017	19.4663	47.4924	21.7629	37.4065	26.7514	16.2148	34.1277	25.33	15.4339	14.7908	20.1755	15.9075	9.93761	19.1059	15.3213	14.9767	33.6139	15.5452	13.8362
ENSMUSG00000014747	Ankrd53	18.65	32.8803	18.1584	13.4068	37.5939	18.5479	14.0368	27.3209	13.9743	9.93761	28.3213	20.3245	20.2925	57.0244	22.5575	9.93761	28.1053	21.6925	13.7122	22.1349	23.6561	17.5467	136.441	25.2962	17.5991	28.5536	29.736
ENSMUSG00000014748	Tex261	331.95	299.161	403.9	396.661	349.191	419.348	533.236	454.416	377.598	465.112	379.443	281.753	378.919	425.463	370.602	411.551	268.086	299.022	345.843	354.537	327.851	577.346	487.887	368.021	283.016	269.329	299.66
ENSMUSG00000014763	Fam120b	178.05	232.899	237.181	245.694	243.271	436.145	322.429	334.375	421.937	239.403	237.008	224.334	220.215	252.77	226.202	279.552	324.913	279.093	237.654	285.016	291.018	257.066	284.376	333.236	289.695	319.957	191.823
ENSMUSG00000014767	Tbp	237.204	294.888	225.995	210.617	256.856	235.298	285.28	261.124	260.874	244.051	329.836	230.716	267.849	241.817	238.328	265.503	384.658	228.853	308.403	302.96	240.23	311.027	313.731	261.947	293.034	576.995	427.184
ENSMUSG00000014769	Psmb1	1004.72	931.19	878.555	845.645	566.998	641.667	784.681	899.491	953.797	1752.43	1389.35	997.557	1210.78	983.294	760.059	1091.71	696.965	488.654	1036.98	911.447	710.873	1425.46	753.752	625.839	953.661	812.705	850.217
ENSMUSG00000014771	Pdcd2	100.29	123.666	75.3206	74.2019	91.3603	76.9492	119.604	97.9917	100.518	122.076	125.569	93.1304	102.396	101.525	76.0673	107.818	118.868	75.0926	124.02	93.8767	77.2692	150.104	107.873	77.087	92.1809	223.74	138.9
ENSMUSG00000014773	Dll1	247.396	96.763	899.027	158.396	183.458	2510.82	93.0325	130.574	1967.17	107.115	90.3811	2499.85	90.6467	113.78	1715.28	59.3676	103.082	2082.87	65.1146	116.485	2359.75	29.7549	75.3172	1527.06	110.704	172.025	2591.4
ENSMUSG00000014776	Nol3	50.4788	52.1325	71.5294	102.397	39.7724	60.6151	112.368	60.7906	62.6087	55.2071	57.6326	47.5234	81.006	55.7704	61.6431	85.1256	39.9099	61.2597	77.8306	36.1898	61.0177	104.723	45.1171	54.5158	68.4625	40.7121	42.835
ENSMUSG00000014778	Fhod1	255.549	365.39	344.31	405.644	402.127	206.46	486.532	312.234	173.227	170.563	205.735	138.065	328.154	301.435	336.283	262.693	331.77	277.499	302.162	245.754	200.371	510.231	372.426	295.899	202.831	317.933	140.004
ENSMUSG00000014782	Plekhg4	22.6347	26.8726	39.7193	22.7079	27.8596	23.703	31.0607	13.3017	29.3356	25.2432	27.2688	26.8079	32.7075	35.3033	45.9677	37.8435	43.025	37.9768	32.4138	33.7523	32.7729	21.9819	20.8034	25.2962	40.8021	48.1675	34.5965
ENSMUSG00000014786	Slc9a5	78.6521	70.7745	57.2278	140.362	87.2401	49.0386	164.12	57.2881	33.2282	71.3889	55.7386	57.4369	105.596	73.2025	71.9587	133.248	105.057	79.141	115.65	59.6676	45.5516	102.503	74.3544	57.1422	90.4933	118.158	62.2278
ENSMUSG00000014791	Elmo3	315.655	376.07	174.693	419.117	381.09	247.31	561.975	504.635	295.901	352.754	327.08	231.779	331.327	325.76	185.763	462.087	265.146	173.776	477.877	341.083	234.253	494.826	490.726	237.324	244.606	184.2	83.5034
ENSMUSG00000014813	Stc1	156.607	292.751	212.942	256.484	175.975	76.1361	67.4921	158.784	76.8946	70.4423	804.582	116.701	105.596	589.557	222.16	72.769	127.733	240.818	43.5849	143.529	157.475	98.0599	153.548	95.9892	232.912	632.638	503.014
ENSMUSG00000014837	4931428F04Rik	83.8169	87.0439	82.8838	118.688	59.5873	72.8805	128.038	91.9701	68.5763	78.9455	94.0959	67.2425	88.5068	81.8503	72.9867	94.5954	65.3394	71.8483	88.3722	75.7009	94.4067	102.503	79.1645	81.3934	114.066	79.3151	42.835
ENSMUSG00000014846	Tppp3	328.895	239.314	724.078	491.866	357.336	689.643	569.16	616.125	947.966	385.258	395.977	503.792	273.14	305.084	586.541	453.664	179.826	401.024	488.272	231.166	443.284	313.229	234.17	460.477	301.382	273.38	465.65
ENSMUSG00000014850	Msh3	310.562	231.83	210.144	197.119	191.619	259.319	243.323	198.044	232.843	340.68	203.895	251.985	329.211	232.08	217.106	159.56	155.273	204.117	188.712	158.156	249.195	215.196	207.631	251.759	296.373	107.965	144.419
ENSMUSG00000014852	Adamts13	9.93761	18.9262	19.45	15.1536	24.6922	17.3959	21.2029	23.2926	19.4663	16.7707	20.5854	18.8954	17.3553	25.7621	18.6002	13.4898	24.682	16.1484	15.6382	19.217	22.4343	13.8391	29.8041	21.1371	9.93761	19.9927	21.9714
ENSMUSG00000014856	Tmem208	165.799	217.928	184.026	201.619	171.893	127.823	238.526	204.867	153.33	240.333	199.294	135.93	208.565	205.294	161.477	249.578	221.032	128.189	223.081	192.995	113.477	295.612	200.994	154.022	194.472	219.686	151.04
ENSMUSG00000014859	E2f4	282.04	302.367	280.976	328.384	387.198	317.747	372.748	296.051	305.24	333.249	325.242	256.238	352.48	333.057	347.387	275.806	478.66	307.79	248.062	456.537	246.207	344.054	322.253	282.32	324.753	652.871	445.868
ENSMUSG00000014867	Surf4	1801.46	2141.5	1818.35	1479.47	2112.71	1700.99	1625.09	2260.83	1851.72	2708.31	2317.41	1786.41	2214.76	2633.37	1854.47	1991.56	2770.85	1648.11	1585.62	3088.07	1638.76	2057.92	1882.27	1237.13	2968.26	2942.84	2383.78
ENSMUSG00000014873	Surf2	265.738	333.347	278.181	260.08	349.87	343.351	278.089	296.051	309.909	279.367	295.838	316.826	250.916	316.03	324.168	258.009	347.441	364.373	291.76	316.416	338.799	259.269	340.241	310.326	429.89	391.825	400.805
ENSMUSG00000014905	Dnajb9	966.047	1357.05	1037.68	732.517	1635.93	1211.72	390.716	1167.52	960.794	1562.18	2736.91	2086.86	841.931	1407.37	1430.84	1263.83	1718.77	1718.18	1167.91	2457.39	1790.92	513.532	1026.2	840.354	2169.44	1685.62	3997.48
ENSMUSG00000014907	Naf1	221.913	289.545	277.25	476.599	453.019	460.939	369.154	399.935	391.601	310.027	431.797	403.949	206.447	371.969	379.686	259.883	534.465	422.535	183.502	521.536	399.504	230.625	363.907	318.812	226.228	677.15	849.118
ENSMUSG00000014932	Yes1	721.813	787.094	764.094	824.995	884.452	747.212	594.306	736.964	679.728	819.707	862.42	907.307	603.053	691.644	749.972	801.713	1125.67	939.418	898.778	1061.57	973.443	714.865	664.821	867.484	835.242	1059.52	1236.92
ENSMUSG00000014956	Ppp1cb	3427.45	5566.29	3240.08	4681.63	5399.92	4001.74	3726	6040.96	3583.37	5007.96	8320.7	4277.07	3146.85	6311.29	3271.58	4839.76	5850.7	3487.44	4995.73	7238.44	3923.03	5541.28	6615.53	3175.07	4519.2	6739.71	5671.59
ENSMUSG00000014959	Gorasp2	926.36	1145.72	848.777	799.856	1129.98	932.703	876.87	959.905	897.819	1308.82	1310.41	1107.98	1021.6	1244.55	998.121	1059.9	1897.87	1016.66	893.582	1902.88	941.617	935.975	965.66	691.129	1320.57	1973.88	1499.47
ENSMUSG00000014980	Tsen15	75.548	102.153	103.592	96.9568	127.611	118.972	107.541	132.285	139.272	83.656	132.033	94.2042	100.262	107.655	109.75	90.8104	143.477	80.7585	106.223	126.635	116.483	113.596	133.588	148.062	70.1652	161.875	97.9583
ENSMUSG00000015001	Oc90	30.927	21.735	19.45	20.4268	17.6806	13.1841	16.1572	13.3017	13.9743	19.4336	18.0868	23.016	15.6976	18.0487	21.2877	27.5097	28.1053	18.5256	44.6795	20.707	18.5208	17.5467	15.3213	9.93761	24.119	26.2234	15.836
ENSMUSG00000015002	Efr3a	1121.74	1131.85	986.497	1035.98	980.766	1343.64	776.301	961.606	1114.73	1396.98	1266.35	1362.79	1067.05	1075.64	1091.93	1515.45	1391.88	1214.14	1463.01	1411.09	1276.77	1122.97	995.931	1108.26	1715.83	2017.37	1763.12
ENSMUSG00000015013	Trappc2l	86.9114	92.4464	98.894	106.021	68.6219	84.2553	137.668	116.015	135.755	124.879	88.5223	82.3755	119.442	83.0832	97.5337	94.5954	52.2377	57.9837	87.3197	75.7009	65.0969	122.458	88.7582	76.2248	71.8662	56.5631	67.8518
ENSMUSG00000015016	Acsf3	103.372	125.814	86.6574	129.53	94.7903	95.586	153.304	149.386	100.518	131.414	127.416	71.5781	143.889	134.569	104.663	115.361	103.082	53.8725	113.557	82.5301	77.2692	140.158	163.044	73.6361	76.9601	86.4984	32.1858
ENSMUSG00000015023	Ddx19a	356.39	331.21	330.342	284.35	290.131	441.744	315.24	387.165	469.77	489.251	506.183	546.274	348.25	402.364	399.871	290.79	259.266	304.602	307.363	337.72	410.45	389.183	326.986	394.318	281.347	430.281	372.225
ENSMUSG00000015027	Galns	95.1498	109.69	99.8339	111.453	111.904	86.6864	143.684	123.725	129.892	96.8087	120.025	75.9033	126.888	126.014	112.8	90.8104	69.3412	77.5225	75.7171	123.253	75.2459	131.311	123.121	71.044	71.8662	70.0476	77.9264
ENSMUSG00000015053	Gata2	102.345	154.776	234.384	80.5913	118.054	36.344	25.5931	497.826	55.4072	13.4737	39.399	29.2373	32.7075	55.7704	88.351	21.9168	25.84	100.908	26.5451	24.8652	75.2459	17.5467	54.9682	123.345	31.7763	21.3093	72.336
ENSMUSG00000015083	C8g	26.2944	30.5128	28.5065	26.9885	29.4019	28.3876	36.3085	32.1145	34.5042	29.5224	30.3951	28.0302	31.5389	41.814	31.9094	34.8101	22.2966	20.6714	34.6919	24.8652	22.4343	44.0295	39.1052	30.1649	24.119	30.832	15.836
ENSMUSG00000015085	Entpd2	86.9114	95.6842	256.752	193.519	83.1148	312.945	300.86	147.677	231.674	75.1706	93.1675	149.799	142.827	115.004	218.117	96.4866	49.1844	163.389	73.6016	99.5376	208.345	161.148	128.832	135.283	98.9246	47.11	179.705
ENSMUSG00000015087	Rabl6	492.812	594.95	487.682	499.949	597.525	489.73	603.885	548.892	512.932	687.905	540.158	481.489	600.939	605.357	515.916	536.01	631.38	491.84	491.39	614.541	453.234	748.968	653.468	474.046	545.007	620.498	446.967
ENSMUSG00000015090	Ptgds	9.93761	13.7713	16.7818	9.93761	12.8948	17.3959	14.0368	18.9056	19.4663	9.93761	13.4515	13.7596	18.8684	16.2148	18.6002	13.4898	15.4339	16.1484	15.6382	9.93761	13.6175	15.8406	15.3213	17.6805	17.5991	9.93761	9.93761
ENSMUSG00000015092	Edf1	393.046	426.261	401.107	413.728	350.549	432.945	528.446	479.1	493.101	636.853	495.163	488.923	624.194	455.855	388.77	573.436	357.236	283.876	519.455	400.497	365.671	863.373	415.018	395.167	616.737	552.713	306.259
ENSMUSG00000015093	Clic3	43.017	37.5207	29.5605	39.8389	37.5939	19.6446	43.9647	16.4093	23.9069	71.3889	25.1237	23.016	63.768	37.9269	29.6571	48.7149	19.7744	21.6925	51.1949	20.707	19.8798	72.4057	31.9151	31.1123	87.1156	29.6983	23.332
ENSMUSG00000015094	Npdc1	479.579	582.14	667.31	664.277	410.949	606.484	1000.18	617.827	715.883	470.682	485.062	451.749	523.77	595.634	664.223	585.599	311.198	409.788	499.706	418.431	495.018	824.872	528.575	456.236	533.329	299.708	364.53
ENSMUSG00000015095	Fbxw5	333.987	278.86	298.675	369.712	226.965	417.748	581.134	347.148	465.103	431.687	278.377	322.139	379.977	272.239	366.565	462.087	144.46	225.662	443.573	184.008	305.951	680.762	285.323	335.782	251.287	99.799	123.432
ENSMUSG00000015112	Slc25a13	146.388	391.021	156.016	166.505	368.874	308.144	190.539	184.395	251.531	215.228	331.673	436.878	190.555	307.516	281.761	155.804	592.224	343.654	151.178	631.349	362.685	179.91	209.527	264.494	130.854	368.546	479.937
ENSMUSG00000015120	Ube2i	573.222	699.565	553.767	995.579	1096.75	884.732	955.886	659.526	704.22	1096.29	911.076	946.593	836.647	797.371	929.528	887.778	1081.63	1104.25	906.052	1010.04	863.047	775.369	977.012	801.353	881.943	1190	1305.03
ENSMUSG00000015126	Tsr3	77.6178	76.2102	80.0503	70.542	56.0931	54.8478	113.575	61.6644	67.3848	89.2987	61.4098	65.0702	103.463	80.6168	62.6781	66.0842	72.3362	66.9708	83.1063	72.2785	72.2074	92.4999	77.2417	73.6361	54.7603	102.863	90.182
ENSMUSG00000015127	Unkl	187.235	216.859	204.549	161.099	203.178	274.529	162.918	162.201	257.371	122.076	152.327	209.439	135.391	212.601	209.02	206.469	208.282	258.363	208.504	199.733	254.175	139.053	186.768	267.041	169.382	206.509	203.937
ENSMUSG00000015133	Lrrk1	1297.78	305.572	861.804	1070.99	207.936	851.952	1325.81	307.124	797.523	1119.49	168.913	712.995	1002.58	222.341	668.259	1314.34	132.655	581.049	1138.82	126.635	656.167	1059.17	200.046	693.673	925.308	139.526	228.155
ENSMUSG00000015134	Aldh1a3	113.634	1833.06	219.469	119.592	1777	126.215	194.14	2129.81	190.77	109.923	2758.94	398.637	221.274	3421.93	471.52	87.0216	1582.73	308.587	122.974	4123.15	404.48	74.6464	3104.38	102.84	279.677	5768.75	385.416
ENSMUSG00000015143	Actn1	2112.82	1476.59	2762.76	2926.6	1993.35	6687.79	2927.54	1702.7	5819.91	2707.38	1755.62	6879.19	2133.39	1859.38	4791.55	2480.77	3674.16	5118.13	2054.23	2331.93	6021.31	2392.29	1545.53	5007.86	4275.72	5522.98	5973.67
ENSMUSG00000015149	Sirt2	349.262	353.641	585.411	395.763	402.806	717.628	484.137	622.933	787.026	337.893	461.185	480.426	334.5	437.62	576.452	340.414	320.015	494.23	259.509	430.76	608.422	369.372	437.732	570.722	239.594	332.106	390.912
ENSMUSG00000015165	Hnrnpl	2921.75	3484.1	2682.74	2658.19	4238.18	2897.74	2661.79	3383.9	2553.72	3609.42	3739.3	2790.75	3272.61	3730.55	3111.21	2437.74	2951.9	3000.94	2310.88	3908.07	2844.05	2755.26	3658.67	2663.04	2212.8	2465.44	1991.61
ENSMUSG00000015176	Nolc1	429.698	565.059	482.097	589.749	936.679	851.952	617.057	662.93	728.713	660.058	889.961	845.723	574.512	664.908	757.033	341.35	1085.54	1186.27	291.76	1294.59	876.971	601.551	694.15	593.617	608.397	1870.72	2101.47
ENSMUSG00000015189	Casd1	409.336	345.097	413.21	486.478	356.657	683.246	500.903	445.053	487.268	512.46	412.51	525.033	381.034	419.385	464.456	440.563	335.688	392.26	348.962	374.715	481.091	560.843	362.96	475.743	374.823	374.619	444.769
ENSMUSG00000015202	Cnksr3	183.153	287.408	429.967	195.319	362.766	997.462	159.313	298.606	662.233	164.976	357.397	897.751	175.716	435.189	706.594	166.132	260.246	997.549	127.157	300.717	921.726	99.1711	358.227	553.762	117.426	297.683	735.956
ENSMUSG00000015214	Mtmr1	794.068	954.672	439.277	1092.54	1178.81	449.742	880.461	736.964	432.437	1290.26	1075.4	428.381	851.444	882.435	510.871	1681.02	1338.05	507.771	1600.17	1443.58	534.811	1296.77	857.816	431.64	1018.71	1822.17	621.689
ENSMUSG00000015217	Hmgb3	133.093	166.561	72.4779	200.719	203.178	228.09	180.935	209.984	224.665	355.54	335.348	275.375	239.272	264.939	192.843	228.965	234.759	191.345	248.062	258.095	235.249	216.298	227.536	189.747	303.051	242.992	257.864
ENSMUSG00000015222	Map2	233.126	1572.64	617.985	287.945	1742.41	1884.86	299.662	1690.79	1329.3	145.407	2092.51	1732.26	168.294	1568.98	1088.9	121.955	1283.25	1025.42	121.928	2029.47	1541.31	173.289	1857.68	1352.42	182.766	1215.29	1058.95
ENSMUSG00000015224	Cyp2j9	72.4394	17.4019	168.158	37.9179	25.4965	382.552	42.7011	28.2963	279.556	33.6443	20.5854	205.183	22.9741	16.2148	168.562	18.1865	9.93761	166.585	9.93761	15.9075	201.367	19.1059	15.3213	192.297	33.6139	13.6537	96.8483
ENSMUSG00000015242	Nipsnap3a	26.2944	29.3131	20.6831	17.9706	25.4965	19.6446	14.0368	13.3017	17.8368	13.4737	24.0262	28.0302	15.6976	18.0487	26.1906	15.2849	24.682	27.421	9.93761	9.93761	19.8798	9.93761	16.853	14.9767	17.5991	13.6537	27.2339
ENSMUSG00000015243	Abca1	3295.17	3268.52	6021.17	3312.62	3839.4	4979.43	1400.03	4510.37	4778.6	355.54	2600.14	4698.55	1505.64	3095.09	5056.82	970.099	1636.56	6363.44	761.607	2512.28	5603.64	1160.37	4107.97	5656.37	1555.73	1120.21	4513.77
ENSMUSG00000015247	Nipsnap3b	269.814	274.585	239.977	298.73	272.477	185.622	231.331	284.978	189.601	336.036	301.352	208.375	279.489	253.987	221.149	406.871	268.086	215.29	359.361	322.023	190.4	276.892	272.064	182.096	293.034	309.833	222.652
ENSMUSG00000015289	Lage3	69.3257	77.2957	70.5804	68.7093	63.765	71.2507	113.575	90.248	115.807	120.208	117.251	67.2425	110.925	84.3156	59.5701	71.8156	45.0873	43.0613	80.9973	69.9935	55.8972	118.028	83.9653	75.3623	51.3035	43.9237	40.5054
ENSMUSG00000015290	Ubl4a	247.396	313.05	219.469	291.54	381.768	249.712	328.42	416.961	361.261	364.827	347.292	238.161	329.211	361.025	257.522	308.581	360.174	208.906	229.327	465.503	285.044	396.887	400.821	238.173	288.026	411.053	328.25
ENSMUSG00000015291	Gdi1	1225.53	901.304	897.166	1341.22	992.974	960.686	1414.4	1095.19	1026.1	1667.05	863.338	779.891	1191.76	735.394	941.633	1759.59	801.7	804.837	1641.73	936.094	861.058	2213	1037.55	853.919	1108.77	781.346	601.911
ENSMUSG00000015305	Sash1	1768.9	2173.52	2854.88	2494.8	3243.95	3578.05	1842.97	3340.51	3063.3	1117.63	3183.95	3333.26	1200.21	2671.03	3036.57	1779.23	1489.75	3313.06	1764.34	2917.8	3450.67	1166.97	3277.48	2558.77	1585.75	1638.08	2226.7
ENSMUSG00000015312	Gadd45b	785.926	641.921	1157.71	710.07	1148.97	1868.87	641.004	1236.44	1662.81	347.181	764.187	1249.19	712.983	658.831	1350.15	599.634	791.912	1924.41	548.557	1176.96	1934.12	554.242	701.719	1026.03	720.155	683.22	867.795
ENSMUSG00000015314	Slamf6	69.3257	25.6267	112.975	24.8835	19.5784	9.93761	9.93761	17.6985	16.057	9.93761	9.93761	15.7139	15.6976	16.2148	22.5575	9.93761	15.4339	13.1767	9.93761	9.93761	9.93761	9.93761	13.5127	21.1371	17.5991	13.6537	15.836
ENSMUSG00000015316	Slamf1	33.1787	17.4019	44.6459	19.2276	14.3493	14.8024	9.93761	18.9056	9.93761	9.93761	13.4515	9.93761	13.7495	9.93761	9.93761	15.2849	9.93761	18.5256	13.7122	9.93761	9.93761	9.93761	13.5127	14.9767	17.5991	9.93761	19.0982
ENSMUSG00000015335	Zdhhc12	72.4394	57.65	50.4843	35.9824	43.3692	45.6935	57.6662	39.4955	50.5725	82.7146	27.2688	47.5234	86.3656	43.0995	57.493	35.8259	37.8155	38.8302	43.5849	30.0289	46.5945	92.4999	50.0627	66.7152	44.33	39.6347	41.6722
ENSMUSG00000015337	Endog	68.2865	88.125	86.6574	68.7093	63.0697	85.8762	117.193	69.5022	78.0802	62.8488	76.4124	81.2979	75.6356	102.751	88.351	48.7149	66.3409	73.4711	56.5734	66.5602	67.1318	92.4999	66.6334	64.9802	42.5703	81.3694	55.4426
ENSMUSG00000015340	Cybb	812.385	140.839	1177.25	518.808	306.426	88.3061	28.3643	376.097	204.799	30.5644	34.4492	50.8441	281.606	202.858	482.619	106.875	72.3362	877.305	38.061	38.6006	278.075	79.1208	149.748	298.445	97.2396	25.0329	113.475
ENSMUSG00000015341	Golga7	481.615	591.748	410.417	569.096	704.704	744.014	488.927	586.339	633.074	631.283	564.951	670.52	560.77	633.31	672.294	567.822	819.318	721.219	472.68	673.926	622.348	480.522	655.36	551.218	613.401	919.929	932.614
ENSMUSG00000015342	Xk	108.505	52.1325	50.4843	92.4183	51.1767	129.432	112.368	69.5022	116.981	179.873	66.1138	71.5781	116.249	64.5157	70.9302	187.714	80.3009	57.9837	180.376	79.1179	79.2906	309.926	85.8833	98.5592	212.86	101.842	77.9264
ENSMUSG00000015354	Pcolce2	65.1647	9.93761	154.148	263.676	34.6587	80.1989	267.301	28.2963	237.515	38.6655	18.0868	45.298	90.6467	21.3178	60.6071	62.2507	17.0031	100.908	33.5566	17.6362	118.486	57.7614	15.3213	83.9739	105.659	18.616	119.008
ENSMUSG00000015355	Cd48	83.8169	39.8063	117.662	48.3548	32.4281	23.703	14.0368	60.7906	33.2282	15.2595	13.4515	9.93761	74.56	37.9269	58.5321	23.0791	18.432	55.5194	9.93761	15.9075	28.3216	29.7549	30.8638	41.2154	26.097	13.6537	21.9714
ENSMUSG00000015357	Clpx	485.686	504.205	384.349	882.456	495.085	486.531	793.062	709.734	516.431	771.442	687.066	461.308	609.395	538.51	367.574	688.514	509.989	356.404	678.47	545.068	427.365	774.269	622.246	457.932	518.315	460.639	450.264
ENSMUSG00000015363	Trabd	469.399	545.843	300.538	308.616	436.734	221.682	339.204	475.696	250.363	529.171	341.78	197.733	568.169	450.992	288.83	536.01	462.015	228.055	478.917	484.555	230.268	592.749	462.337	236.475	585.043	371.583	207.24
ENSMUSG00000015365	Mov10l1	15.5658	9.93761	15.2679	9.93761	9.93761	9.93761	19.6336	13.3017	13.9743	13.4737	13.4515	9.93761	9.93761	14.0727	9.93761	9.93761	15.4339	14.7908	13.7122	9.93761	15.4877	9.93761	16.853	13.2947	9.93761	13.6537	13.8362
ENSMUSG00000015377	Dennd6b	108.505	110.766	102.652	104.209	116.688	122.996	130.446	78.1677	93.4471	97.7465	67.9909	75.9033	134.329	106.43	133.105	124.779	116.896	112.956	99.9307	74.5608	113.477	100.282	128.832	113.954	135.885	93.6657	61.1
ENSMUSG00000015396	Cd83	665.839	93.5259	998.594	390.374	205.897	64.7154	29.7202	348	139.272	31.5981	33.4452	46.412	160.87	97.8429	216.096	50.6636	53.2524	449.621	36.9435	57.3606	194.389	39.3642	65.6656	144.656	78.6554	21.3093	112.368
ENSMUSG00000015405	Ace2	18.65	17.4019	18.1584	16.6298	14.3493	13.1841	16.1572	22.2414	16.057	18.1446	13.4515	15.7139	15.6976	9.93761	22.5575	16.8046	13.5837	16.1484	9.93761	13.8809	9.93761	9.93761	9.93761	16.3947	19.9208	9.93761	17.5405
ENSMUSG00000015437	Gzmb	33.1787	24.3589	31.641	23.8062	39.0481	9.93761	9.93761	18.9056	9.93761	9.93761	15.2244	9.93761	9.93761	21.3178	17.1389	9.93761	25.84	14.7908	9.93761	22.1349	13.6175	9.93761	9.93761	13.2947	9.93761	13.6537	21.9714
ENSMUSG00000015451	C4a	100.29	131.182	217.604	111.453	208.616	285.735	135.262	133.996	244.524	46.521	112.627	145.533	105.596	130.904	169.575	57.4411	158.221	192.942	55.5006	185.132	284.049	50.9328	135.49	132.726	93.8678	130.374	187.417
ENSMUSG00000015452	Ager	26.2944	44.3283	25.2718	29.0427	32.4281	20.7004	32.3881	22.2414	13.9743	27.4083	27.2688	29.2373	38.4418	37.9269	30.788	31.7284	28.1053	31.0242	32.4138	19.217	29.4496	34.6209	45.1171	42.1142	28.025	19.9927	21.9714
ENSMUSG00000015461	Atf6b	275.927	216.859	320.097	232.206	221.529	304.943	393.112	297.755	382.266	369.471	238.847	315.763	361.999	318.463	343.349	215.843	174.917	216.088	199.13	218.82	257.163	444.209	201.942	296.748	272.998	240.966	231.457
ENSMUSG00000015467	Egfl8	33.1787	49.9138	78.1596	42.698	53.2877	169.583	68.7153	52.0083	75.7084	61.8966	47.1547	79.1415	47.3807	43.0995	82.216	52.6063	44.0575	88.8319	41.3865	44.5429	87.3612	70.1623	66.6334	73.6361	54.7603	46.0504	114.582
ENSMUSG00000015468	Notch4	188.255	62.0402	483.028	116.88	91.3603	87.4963	47.7332	77.3028	92.2676	26.3332	54.79	49.7393	52.8814	97.8429	257.522	34.8101	46.1148	273.512	40.2821	73.42	238.238	39.3642	90.6735	355.296	63.343	34.18	94.6274
ENSMUSG00000015474	Ppt2	93.0918	82.7156	168.158	99.6777	88.614	132.648	166.523	132.285	142.787	106.179	83.8707	101.713	108.794	89.2404	135.134	86.0738	52.2377	98.4958	79.9422	50.4017	132.496	186.528	131.686	161.682	44.33	37.4678	66.7288
ENSMUSG00000015476	Prrt1	23.8796	23.0641	37.7272	66.8744	16.6604	36.344	119.604	33.9853	42.0121	25.2432	13.4515	25.5675	22.9741	14.0727	37.4072	41.8339	17.0031	25.5674	35.8207	15.9075	37.1023	70.1623	27.6548	37.5936	17.5991	13.6537	20.5657
ENSMUSG00000015478	Rnf5	140.253	137.621	129.836	136.752	105.749	115.751	220.536	194.632	133.41	263.569	177.202	88.8325	231.862	188.24	124.988	226.153	86.2577	67.7847	196.005	109.711	83.3287	347.357	155.448	113.954	197.816	70.0476	56.5768
ENSMUSG00000015484	Fam163a	21.3559	20.3612	18.1584	9.93761	23.8775	14.8024	16.1572	9.93761	9.93761	16.7707	18.0868	24.3053	21.6556	25.7621	19.974	9.93761	23.5026	19.6189	18.7699	15.9075	18.5208	13.8391	20.8034	18.8843	14.9269	15.5452	19.0982
ENSMUSG00000015488	Cacfd1	568.133	509.544	364.796	531.38	442.841	376.152	479.347	382.908	384.6	673.982	350.048	328.515	619.966	444.914	420.055	688.514	654.874	417.755	614.035	540.586	451.244	648.858	495.457	406.194	630.082	511.231	272.165
ENSMUSG00000015501	Hivep2	2850.52	2092.4	2125.4	2407.72	2484.37	2349.33	1202.51	1323.22	2004.48	2519.92	2105.36	2738.73	1841.71	2394	2604.89	4111.12	4688.05	4239.88	3466.28	4763.91	2882.84	1172.47	1307.15	1484.67	5154.58	6029.7	7334.7
ENSMUSG00000015519	2310057J18Rik	9.93761	9.93761	15.2679	9.93761	9.93761	9.93761	17.9712	14.9877	13.9743	13.4737	16.7239	13.7596	9.93761	16.2148	9.93761	9.93761	9.93761	9.93761	9.93761	13.8809	9.93761	9.93761	9.93761	9.93761	9.93761	17.1517	9.93761
ENSMUSG00000015522	Arnt	946.713	732.655	1092.58	712.763	790.849	1106.99	684.109	908	1065.75	960.783	869.764	875.454	853.558	770.636	950.711	676.352	635.296	933.844	618.192	735.549	905.813	648.858	859.708	976.854	873.604	533.49	711.785
ENSMUSG00000015533	Itga2	579.329	583.207	272.591	120.496	446.912	334.55	73.5989	279.867	222.328	398.259	519.957	649.282	373.632	600.495	404.917	727.807	1415.37	433.688	631.703	574.203	302.965	192.043	425.429	232.228	1122.11	2227.75	527.19
ENSMUSG00000015536	Mocs2	324.821	373.934	311.715	260.979	339.01	389.752	206.14	238.116	281.892	302.595	331.673	444.314	277.373	324.544	335.273	331.988	587.329	370.747	343.763	299.596	301.969	274.689	287.217	388.381	241.265	553.725	331.548
ENSMUSG00000015542	Nat9	93.0918	104.307	88.5425	84.2352	85.1781	75.3227	95.4535	91.1092	95.8053	120.208	80.1443	72.6603	95.9912	90.4704	81.1922	82.2794	64.3372	53.8725	115.65	68.8499	62.0388	120.243	114.548	74.4994	58.2023	40.7121	33.3954
ENSMUSG00000015568	Lpl	1810.62	367.526	3072.6	2052.23	601.596	716.829	675.727	1164.97	1660.48	831.773	282.972	448.562	1225.58	427.895	1320.9	643.607	154.29	2219.02	371.838	108.582	1386.17	1373.76	271.117	1177.78	1088.75	93.6657	1256.7
ENSMUSG00000015575	Atp6v0e	656.679	513.814	525.844	582.565	417.735	376.952	637.412	565.062	453.437	819.707	578.724	436.878	705.584	559.172	478.583	899.004	586.35	380.309	690.94	550.671	380.598	915.074	556.015	323.054	763.522	563.842	516.201
ENSMUSG00000015597	Zfp318	344.171	300.23	439.277	380.492	380.411	681.647	405.09	478.249	556.092	285.871	407.917	467.681	276.315	352.513	500.781	272.059	287.684	464.756	260.549	325.387	565.649	372.674	364.853	577.506	264.648	384.74	394.21
ENSMUSG00000015599	Ttbk1	13.6667	9.93761	16.7818	9.93761	12.8948	9.93761	17.9712	17.6985	9.93761	15.2595	15.2244	9.93761	18.8684	14.0727	13.6478	18.1865	13.5837	9.93761	9.93761	9.93761	15.4877	20.5748	13.5127	13.2947	17.5991	15.5452	19.0982
ENSMUSG00000015605	Srf	673.981	521.288	765.025	1369.05	1157.79	1324.45	1355.74	852.691	1219.68	652.633	471.287	1139.83	554.427	769.421	1042.5	754.937	1590.56	953.752	511.139	1442.46	1101.74	399.088	669.552	842.049	1348.93	1247.66	694.205
ENSMUSG00000015619	Gata3	1960.2	1421.09	744.552	1184.11	1631.19	1815.31	3578.76	2351.87	1921.69	2095.81	1240.64	1113.29	2770.63	1250.62	1250.29	986.937	812.467	1219.72	1277.01	1078.37	1727.27	7363.8	2116.86	2051.82	1228.85	1423.65	779.903
ENSMUSG00000015627	Gata5	9.93761	9.93761	9.93761	9.93761	14.3493	9.93761	16.1572	13.3017	9.93761	9.93761	13.4515	15.7139	9.93761	9.93761	15.5357	9.93761	13.5837	9.93761	13.7122	9.93761	13.6175	9.93761	9.93761	9.93761	9.93761	13.6537	13.8362
ENSMUSG00000015647	Lama5	14042	5033.74	3883.95	4180.7	2347.37	2290.17	4925.48	1976.66	2164.24	16059.7	2221.94	4321.66	20281.5	2376.99	4501.07	14035.3	3147.64	3211.94	14644.1	2361.05	4552.52	13137.1	2785.61	3780.35	14588.5	4097.88	2462.88
ENSMUSG00000015652	Steap1	28.6366	30.5128	33.6919	170.109	30.9236	31.9757	144.887	33.0525	45.7	44.5721	29.3629	29.2373	32.7075	27.1766	30.788	113.476	40.9515	30.1339	76.7741	36.1898	36.0285	81.3548	26.562	31.1123	40.8021	48.1675	77.9264
ENSMUSG00000015653	Steap2	349.262	131.182	274.455	1097.03	186.859	703.236	1562.84	456.118	826.679	411.259	143.106	583.443	248.799	99.0704	452.347	791.422	176.881	396.244	867.603	152.532	502.977	1066.87	202.891	574.962	388.174	110.005	546.97
ENSMUSG00000015656	Hspa8	1129.88	1407.21	1736.47	4739.08	6246.29	7121.88	4112.66	7217.62	6984.82	7145.19	10629.3	8867.67	6292.9	8386.56	7746.76	4223.36	6295.99	8022	3409.14	8560.28	7879.92	5041.93	5959.08	5610.59	6442.02	17144.2	12538.3
ENSMUSG00000015659	Serac1	210.696	261.761	131.708	227.709	201.818	118.972	162.918	192.926	94.6264	146.339	153.249	136.998	190.555	188.24	157.426	266.44	278.866	169.781	385.355	190.748	142.493	185.425	285.323	163.384	234.582	188.257	109.046
ENSMUSG00000015668	Pdzd11	169.884	127.962	103.592	87.8745	106.433	93.1609	91.8214	108.297	126.373	237.544	116.327	99.5689	205.387	117.452	103.645	148.289	89.2319	79.9499	143.871	90.4766	80.3007	196.454	116.454	98.5592	162.687	100.82	66.7288
ENSMUSG00000015671	Psma2	649.555	603.491	510.952	724.436	461.161	469.736	613.464	653.569	615.579	1390.49	906.486	614.239	906.403	590.772	533.069	866.262	613.76	394.65	880.073	710.9	474.126	1150.47	544.661	403.649	775.198	764.149	782.101
ENSMUSG00000015672	Mrpl32	180.092	204.023	146.672	169.208	135.796	127.019	160.515	152.804	159.184	298.878	271.943	150.865	222.332	205.294	137.162	214.906	177.863	144.199	197.047	206.47	128.495	296.714	147.848	136.136	157.665	259.2	294.162
ENSMUSG00000015697	Setdb1	431.734	477.513	438.346	324.79	512.725	575.298	338.005	507.188	526.93	613.646	540.158	494.234	549.141	489.89	441.247	373.177	653.895	412.975	397.831	483.434	529.837	472.819	575.885	501.185	545.007	787.415	441.471
ENSMUSG00000015702	Anxa9	85.8802	108.614	53.3818	50.2263	98.9028	38.9222	67.4921	122.869	42.0121	77.0588	72.6742	35.1106	75.6356	76.9127	52.2787	72.769	71.3384	47.2455	88.3722	100.669	40.2966	86.9321	137.392	44.7979	75.2635	49.2228	29.736
ENSMUSG00000015709	Arnt2	28.6366	30.5128	64.8747	20.4268	14.3493	80.1989	19.6336	28.2963	45.7	13.4737	19.3652	45.298	20.2925	25.7621	59.5701	13.4898	32.4946	63.7104	9.93761	26.1856	68.1481	15.8406	15.3213	56.2676	19.9208	37.4678	40.5054
ENSMUSG00000015711	Prune1	293.246	181.551	164.422	134.947	143.294	189.63	221.736	246.638	257.371	391.759	207.575	178.57	246.682	179.71	180.705	243.957	115.91	120.175	236.613	152.532	168.455	454.113	234.17	185.497	140.914	132.408	89.0698
ENSMUSG00000015714	Cers2	1202.13	1097.7	949.276	916.573	1129.3	846.355	994.196	1140.29	857.001	1850.8	1129.56	696.005	1483.45	1142.48	895.232	1675.4	1216.69	753.87	1562.76	1327.08	799.393	2148.11	1191.75	768.286	1592.42	1289.13	748.042
ENSMUSG00000015733	Capza2	1337.46	1478.72	1570.85	1489.35	1620.34	1538.7	952.294	1461.91	1427.26	1530.63	1841.91	1502.94	1187.53	1364.84	1339.05	1523.87	2026.08	1574.85	1397.55	1846.87	1601.97	1485.96	1279.72	1396.51	1605.76	2917.55	2244.27
ENSMUSG00000015745	Plekho1	123.88	39.8063	273.523	102.397	60.2847	171.187	36.3085	80.7607	105.226	18.1446	33.4452	86.6816	84.2229	59.5273	194.865	37.8435	35.7037	140.998	38.061	32.5214	136.496	38.1869	48.09	184.646	35.4323	28.5536	113.475
ENSMUSG00000015747	Vps45	114.659	118.293	117.662	161.099	93.4187	138.274	153.304	136.562	107.579	186.389	159.7	108.141	135.391	130.904	115.849	168.948	89.2319	89.6382	188.712	97.2741	91.3888	177.703	121.216	121.638	105.659	106.945	66.7288
ENSMUSG00000015748	Prpf3	149.454	205.093	138.257	177.314	219.49	148.717	158.112	169.885	183.754	157.523	211.255	152.998	162.991	193.113	151.35	165.194	313.157	240.02	169.952	319.78	181.425	187.631	195.305	158.278	274.668	584.077	397.507
ENSMUSG00000015749	Anp32e	554.902	494.596	492.336	511.623	589.385	792.786	561.975	641.655	700.721	970.993	775.204	618.487	668.589	591.988	599.657	467.701	657.81	652.728	395.752	830.782	724.798	759.968	592.916	571.57	521.651	1113.13	1191.88
ENSMUSG00000015750	Aph1a	164.778	187.973	164.422	259.181	286.058	278.532	417.068	473.993	348.425	375.972	385.873	240.288	275.257	385.343	273.682	370.369	250.444	210.502	283.438	359.021	235.249	459.615	405.554	277.227	274.668	254.135	155.453
ENSMUSG00000015755	Tab2	1884.9	1671.9	1520.6	2121.35	2159.51	2099.91	1874.09	1992.83	1945.01	2559.82	2277.02	2125.08	1732.86	1924.99	1837.32	2482.64	1782.38	2074.11	1840.19	2349.85	1962.96	2401.09	2040.24	1623.71	2271.17	2808.32	2602.39
ENSMUSG00000015757	Ppil4	521.313	565.059	450.447	849.236	720.305	704.035	676.925	563.36	629.575	647.991	765.105	642.911	514.255	542.156	561.319	765.228	674.451	774.576	750.176	837.504	805.361	707.164	750.914	718.262	630.082	999.839	1242.41
ENSMUSG00000015759	Cnih1	346.207	290.614	435.553	274.463	223.568	398.551	262.506	265.384	435.937	671.197	440.062	444.314	476.196	303.867	441.247	400.32	338.626	326.122	337.523	375.836	372.637	442.008	229.432	311.175	486.617	497.065	657.947
ENSMUSG00000015766	Eps8	1214.34	248.935	1172.6	1707.5	337.652	1384.41	1470.67	394.827	1077.41	1168.68	127.416	1671.75	972.988	178.491	1274.5	1717.5	125.764	1264.31	1381.96	117.613	1407.05	1741.14	251.224	1291.38	903.625	94.6885	1167.71
ENSMUSG00000015776	Med22	326.858	394.225	296.812	390.374	471.338	376.952	547.606	406.746	327.417	320.245	311.46	347.641	298.534	440.051	360.509	415.295	404.244	389.073	407.188	527.139	389.554	576.246	414.072	334.933	246.276	376.643	484.332
ENSMUSG00000015790	Surf1	209.677	250.004	219.469	245.694	278.588	279.332	285.28	293.496	305.24	241.262	244.364	226.461	222.332	233.297	231.255	214.906	178.844	208.108	228.286	194.118	245.211	266.98	234.17	232.228	162.687	179.128	196.229
ENSMUSG00000015804	Med28	212.736	205.093	225.995	308.616	207.257	229.692	372.748	273.052	311.076	328.605	296.757	249.858	292.186	246.686	204.976	310.454	255.345	203.319	341.683	272.678	223.293	413.395	208.579	229.681	279.677	328.056	265.565
ENSMUSG00000015806	Qdpr	148.432	168.703	171.892	156.593	136.478	151.928	214.538	178.421	187.262	167.77	175.36	152.998	165.113	196.768	142.23	137.95	103.082	117.769	126.111	124.38	100.436	199.762	147.848	121.638	93.8678	110.005	81.274
ENSMUSG00000015812	Gnrh1	58.8985	58.7493	32.6698	44.5916	50.4715	24.6649	29.7202	27.3209	19.4663	45.5476	38.417	35.1106	37.3069	33.9793	34.1277	98.377	146.426	49.739	157.438	59.6676	32.7729	19.1059	43.1241	25.2962	102.293	90.5957	59.9711
ENSMUSG00000015829	Tnr	85.8802	20.3612	24.1619	184.517	26.2919	31.9757	156.91	44.9014	50.5725	130.481	26.2037	29.2373	86.3656	18.0487	18.6002	185.838	28.1053	24.6231	153.265	19.217	26.025	61.1559	20.8034	25.2962	157.665	15.5452	17.5405
ENSMUSG00000015837	Sqstm1	4668.81	6146.87	3837.43	3707.61	8577.91	3378.99	3323.78	7704.27	3881.89	4668.3	7704.77	3301.41	4967.69	8612.56	4227.74	8294.06	8590.95	5194.57	6396.34	10927.3	3554.09	3750.66	6223.93	2455.34	9794.02	12839.6	6030.79
ENSMUSG00000015839	Nfe2l2	1125.81	1194.82	1588.53	982.112	972.627	1126.18	1030.11	893.535	1374.78	1515.78	1240.64	1556.02	867.298	898.232	1388.48	891.52	1240.18	1789.84	874.877	1644.11	1677.55	1181.27	856.87	1336.32	1585.75	2375.42	4234.76
ENSMUSG00000015843	Rxrg	15.5658	15.7325	65.8272	9.93761	12.8948	84.2553	14.0368	13.3017	25.3005	13.4737	13.4515	36.2615	13.7495	16.2148	47.0246	9.93761	9.93761	37.9768	9.93761	9.93761	55.8972	9.93761	9.93761	25.2962	14.9269	9.93761	45.1502
ENSMUSG00000015846	Rxra	703.494	586.41	748.274	589.749	771.857	1139.77	839.755	1146.25	1091.41	775.155	831.206	1075.06	524.827	890.941	922.467	494.838	264.166	682.992	488.272	568.6	1032.12	941.475	764.159	961.593	274.668	189.271	277.665
ENSMUSG00000015850	Adamtsl4	260.644	309.845	279.113	279.856	277.909	296.94	293.67	227.035	350.759	115.534	231.49	248.795	188.436	307.516	283.781	233.65	317.076	271.918	315.684	233.411	298.983	115.812	242.698	317.963	187.783	218.673	195.127
ENSMUSG00000015852	Fcrls	219.873	37.5207	316.372	60.4331	56.0931	23.703	14.0368	71.2385	33.2282	18.1446	20.5854	21.6926	166.173	46.9317	98.5527	27.5097	19.7744	83.9904	20.1755	19.217	45.5516	35.816	32.959	78.8105	42.5703	13.6537	46.3031
ENSMUSG00000015854	Cd5l	90.0029	34.0508	170.025	79.6796	89.3008	29.2948	33.7042	92.8309	107.579	15.2595	15.2244	15.7139	50.687	32.6455	60.6071	16.8046	9.93761	43.9014	13.7122	17.6362	19.8798	13.8391	18.2464	25.2962	14.9269	9.93761	19.0982
ENSMUSG00000015869	Prpsap1	260.644	242.521	339.654	213.316	214.054	480.933	312.843	281.57	537.428	349.968	293.081	451.749	393.724	289.271	409.963	218.655	197.491	315.761	180.376	207.593	417.415	353.962	239.855	452.844	254.627	254.135	273.265
ENSMUSG00000015879	Fam184b	39.7775	54.3441	44.6459	37.9179	53.2877	23.703	16.1572	24.323	23.9069	31.5981	53.8402	63.9828	39.572	59.5273	51.2315	38.8463	67.3416	35.3987	62.9852	45.7202	39.2359	24.6715	33.9963	35.7638	70.1652	61.7673	54.3069
ENSMUSG00000015880	Ncapg	345.189	198.674	122.346	70.542	71.3905	80.1989	53.9573	76.4375	49.3584	384.33	188.25	76.9832	413.815	146.781	135.134	202.719	117.882	83.1828	210.586	83.6665	71.1934	176.6	69.5328	68.4481	354.796	143.592	113.475
ENSMUSG00000015882	Lcorl	1586.76	724.116	590.995	323.892	375.661	338.551	244.522	309.679	242.188	1783.98	548.423	349.766	1571.16	453.423	493.718	879.359	642.148	469.536	769.921	415.068	348.752	819.372	405.554	427.399	1717.5	522.36	540.376
ENSMUSG00000015889	Lta4h	344.171	259.623	403.9	348.151	262.29	392.151	444.615	406.746	456.937	454.899	327.998	378.452	475.139	329.408	373.63	289.854	221.032	274.309	268.873	250.242	331.832	549.841	352.547	413.828	328.091	273.38	238.06
ENSMUSG00000015890	Amdhd1	20.0331	15.7325	20.6831	13.4068	17.6806	39.7761	14.0368	13.3017	38.2851	16.7707	13.4515	60.7147	13.7495	9.93761	25.0028	9.93761	15.4339	40.5293	13.7122	13.8809	52.8107	13.8391	13.5127	27.2748	14.9269	9.93761	24.6581
ENSMUSG00000015932	Dstn	3623.83	2324	3384.3	4470.66	2748.86	7735.83	4040.83	3079.31	8798.07	6590.23	3459.33	9800.86	4483.68	2819.27	5448.15	5993.07	5211.64	5061.6	4893.91	4198.2	7224.59	5343.3	2684.4	6140.42	9957.45	6857.04	8808.88
ENSMUSG00000015937	H2afy	974.188	907.708	760.372	820.506	968.557	716.029	711.647	936.931	739.209	1376.57	1304.9	797.942	1159	1174.07	742.91	986.937	955.369	660.693	829.154	1052.61	648.21	1171.37	978.904	643.646	951.993	1107.06	720.574
ENSMUSG00000015942	Gtf2ird2	164.778	154.776	225.995	181.816	175.295	188.027	186.938	198.897	194.278	131.414	166.15	151.932	161.93	172.396	188.797	130.426	206.32	220.077	137.606	213.207	175.44	136.841	194.356	202.496	159.339	199.412	210.543
ENSMUSG00000015943	Bola1	54.6998	63.135	53.3818	48.3548	36.8637	56.4993	85.76	59.0409	59.0144	110.858	96.8799	51.947	127.952	53.2568	52.2787	67.0409	30.3192	36.2613	62.9852	46.8945	48.674	109.161	62.7583	56.2676	80.3495	36.3774	29.736
ENSMUSG00000015944	Gatsl2	229.049	70.7745	228.792	367.916	78.9835	292.138	524.853	160.492	323.916	169.632	53.8402	190.282	199.031	43.0995	200.932	327.307	49.1844	231.246	358.321	48.0661	302.965	318.734	63.7281	249.212	176.074	42.8563	100.178
ENSMUSG00000015947	Fcgr1	90.0029	24.3589	124.219	50.2263	32.4281	22.7241	14.0368	45.7951	30.6456	24.1357	15.2244	33.953	64.8506	19.73	61.6431	15.2849	17.0031	37.9768	15.6382	19.217	37.1023	23.3439	22.0094	42.1142	31.7763	15.5452	32.1858
ENSMUSG00000015950	Ncf1	191.316	51.0241	349.897	172.811	81.7384	49.8717	25.5931	161.346	111.106	16.7707	26.2037	31.6146	104.529	92.9294	182.728	31.7284	39.9099	200.925	27.745	36.1898	67.1318	42.8689	74.3544	146.359	35.4323	18.616	38.1585
ENSMUSG00000015957	Wnt11	158.65	57.65	170.959	207.018	58.1912	237.7	150.899	77.3028	235.179	111.794	52.8893	363.579	95.9912	58.2766	278.732	214.906	53.2524	504.585	118.79	56.205	376.617	69.0395	39.1052	261.947	172.728	51.328	437.075
ENSMUSG00000015961	Adss	1528.76	1396.54	945.554	2038.76	1673.24	912.715	1577.21	1147.95	812.684	2155.2	1582.13	978.446	1460.2	1321.1	1051.58	2464.87	2153.3	1356.68	2592.46	1984.66	1230.03	2060.12	1314.72	949.723	1849.24	2299.57	1736.76
ENSMUSG00000015962	1700016C15Rik	60.991	54.3441	31.641	40.7947	54.6916	23.703	28.3643	54.6526	19.4663	39.6574	70.8024	38.5462	37.3069	45.658	23.7935	64.1688	102.094	40.5293	96.7815	49.235	26.025	27.25	35.0277	23.2588	51.3035	41.7858	28.4926
ENSMUSG00000015966	Il17rb	47.2946	71.8629	39.7193	70.542	68.6219	65.5338	62.5892	38.5858	57.8136	75.1706	45.2297	92.0564	57.2511	57.0244	74.0141	66.0842	56.2884	89.6382	96.7815	49.235	155.478	61.1559	72.4272	101.984	63.343	47.11	48.6009
ENSMUSG00000015968	Cacna1d	133.093	129.035	302.401	147.578	143.294	484.132	132.854	160.492	350.759	222.668	126.492	725.737	131.141	117.452	459.411	147.349	78.3123	528.481	208.504	101.8	655.172	133.524	129.783	634.319	252.957	67.982	472.244
ENSMUSG00000015970	Chdh	406.282	524.49	315.441	413.728	583.958	762.404	666.148	886.728	834.843	1081.44	504.346	573.885	734.123	633.31	423.083	791.422	301.401	639.986	1093.09	437.484	1204.17	722.566	771.727	904.789	1730.84	331.093	323.852
ENSMUSG00000015971	Actr8	140.253	200.814	173.759	147.578	173.934	254.516	210.939	249.195	292.399	181.735	172.597	191.347	149.197	161.422	169.575	151.107	153.307	136.997	153.265	127.762	182.422	214.094	172.537	193.997	83.7345	167.966	121.22
ENSMUSG00000015980	Lrrc27	44.0903	20.3612	33.6919	46.4769	27.8596	37.2064	47.7332	30.2201	31.9425	35.6667	31.4189	32.788	32.7075	28.5687	42.7819	29.6382	24.682	31.0242	34.6919	34.9748	27.1808	34.6209	40.1147	33.9181	29.9153	30.832	32.1858
ENSMUSG00000015981	Stk32c	27.4731	29.3131	29.5605	16.6298	20.4782	18.5479	21.2029	18.9056	17.8368	15.2595	21.7629	21.6926	21.6556	27.1766	28.5152	23.0791	29.2178	34.5325	15.6382	26.1856	24.8513	13.8391	24.329	22.2107	24.119	34.18	58.841
ENSMUSG00000015994	Fnta	332.968	448.685	409.486	370.611	494.406	598.488	348.788	485.91	605.081	510.604	585.151	546.274	415.93	480.166	450.329	464.894	576.56	429.705	443.573	638.071	516.905	388.082	499.242	491.856	429.89	511.231	556.859
ENSMUSG00000016018	Skiv2l2	552.866	624.841	510.952	599.627	687.068	650.463	527.249	589.743	610.913	682.336	743.071	638.663	549.141	600.495	526.006	507.003	821.276	636.8	480.996	939.455	659.151	625.754	619.408	595.313	511.642	1023.1	938.107
ENSMUSG00000016024	Lbp	243.319	902.371	848.777	422.71	630.765	293.739	329.619	753.983	585.252	120.208	1397.62	270.059	422.274	1872.74	841.769	119.13	555.023	391.463	46.8604	755.717	426.37	109.161	651.576	363.779	221.216	776.288	466.749
ENSMUSG00000016028	Celsr1	588.489	275.654	425.313	812.425	215.413	1016.65	1202.51	486.761	947.966	903.24	367.502	898.813	666.475	285.621	668.259	729.678	135.607	534.853	638.978	185.132	889.9	949.175	243.645	791.178	358.134	100.82	250.163
ENSMUSG00000016087	Fli1	371.664	71.8629	766.886	262.777	128.294	119.777	41.4333	163.908	155.671	38.6655	27.2688	114.562	148.136	67.0025	351.424	38.8463	24.682	328.513	28.9298	22.1349	260.15	39.3642	50.0627	341.721	59.9185	22.5819	188.519
ENSMUSG00000016128	Stard13	1019.98	259.623	942.762	514.318	208.616	1320.45	326.024	349.703	378.765	937.58	193.772	700.253	575.569	126.014	877.075	1422.85	107.032	1158.4	1139.85	83.6665	731.76	363.868	89.716	317.115	1262.2	98.7774	1418.18
ENSMUSG00000016150	Tenm1	452.094	84.8805	62.9678	106.021	15.565	31.0881	53.9573	20.056	23.9069	426.116	49.0724	41.9384	268.908	18.0487	54.3685	412.487	30.3192	31.9087	346.882	20.707	44.5062	378.177	35.0277	40.3141	518.315	33.0718	38.1585
ENSMUSG00000016179	Camk1g	125.928	39.8063	45.6237	17.9706	23.8775	38.9222	24.1686	27.3209	29.3356	92.1166	39.399	128.457	50.687	36.6188	55.4113	60.3295	61.3258	57.9837	82.052	30.0289	50.7457	17.5467	27.6548	52.7601	127.499	71.0795	82.389
ENSMUSG00000016181	Diexf	144.343	176.199	158.819	91.51	140.568	216.075	101.501	112.586	155.671	117.404	143.106	184.959	119.442	134.569	171.599	132.307	251.424	236.83	126.111	223.31	186.412	139.053	134.539	190.597	236.253	304.771	435.976
ENSMUSG00000016194	Hsd11b1	64.1226	25.6267	108.285	89.6927	28.6336	64.7154	107.541	49.3538	105.226	47.4924	35.4479	31.6146	84.2229	28.5687	51.2315	33.789	34.6402	67.7847	22.8209	38.6006	51.779	30.9867	35.0277	77.9489	90.4933	21.3093	84.6175
ENSMUSG00000016200	Syt14	32.0571	15.7325	16.7818	38.8801	18.6488	17.3959	84.5464	48.4663	16.057	18.1446	9.93761	15.7139	18.8684	14.0727	17.1389	29.6382	15.4339	13.1767	22.8209	15.9075	13.6175	30.9867	20.8034	18.8843	33.6139	13.6537	13.8362
ENSMUSG00000016206	H2-M3	85.8802	40.9424	140.127	81.5027	32.4281	67.9865	63.8166	52.8908	100.518	44.5721	35.4479	76.9832	57.2511	48.2022	77.0932	48.7149	28.1053	73.4711	60.8522	24.8652	71.1934	72.4057	47.101	68.4481	61.632	27.3961	56.5768
ENSMUSG00000016239	Lonrf3	105.426	175.128	121.41	104.209	294.884	117.362	72.3793	157.076	78.0802	93.0555	237.008	238.161	92.7854	275.889	254.492	126.662	444.391	385.089	140.739	550.671	257.163	91.387	250.277	148.914	182.766	536.525	431.58
ENSMUSG00000016252	Atp5e	316.673	275.654	276.318	257.383	165.768	183.217	299.662	227.888	369.43	407.545	335.348	239.224	311.229	205.294	163.501	272.996	182.771	132.994	230.368	170.523	162.467	283.499	117.406	145.507	237.924	161.875	183.011
ENSMUSG00000016253	Nelfcd	155.585	146.201	148.541	177.314	156.237	178.406	251.716	168.178	198.954	195.694	157.857	152.998	181.017	157.763	175.646	154.865	115.91	151.397	120.882	142.404	160.47	219.605	169.689	156.576	124.142	131.391	83.5034
ENSMUSG00000016255	Tubb1	15.5658	9.93761	13.479	15.1536	12.8948	13.1841	14.0368	9.93761	13.9743	13.4737	9.93761	13.7596	13.7495	9.93761	9.93761	9.93761	15.4339	16.1484	9.93761	13.8809	9.93761	9.93761	13.5127	14.9767	9.93761	13.6537	17.5405
ENSMUSG00000016256	Ctsz	636.324	394.225	946.484	606.81	419.77	608.083	535.631	551.445	752.038	440.972	372.095	514.413	543.856	486.244	763.086	357.264	270.046	604.146	287.599	329.872	518.894	527.835	385.677	556.306	436.564	414.089	487.629
ENSMUSG00000016257	Slmo2	275.927	216.859	195.222	283.451	207.936	192.035	239.725	191.22	172.057	430.758	209.415	184.959	282.664	193.113	194.865	338.541	272.986	192.942	310.483	281.652	147.489	404.591	199.098	143.804	304.721	360.449	335.946
ENSMUSG00000016262	Sertad4	167.842	589.613	270.728	307.717	882.417	724.025	286.479	901.193	778.863	192.903	972.584	478.302	148.136	1023.39	388.77	183.962	767.441	379.512	136.562	1119.82	483.08	90.2738	931.604	404.497	85.4256	477.84	295.262
ENSMUSG00000016283	H2-M2	46.229	35.2138	126.092	29.0427	17.6806	16.1637	14.0368	31.1705	23.9069	15.2595	20.5854	31.6146	25.5158	28.5687	42.7819	18.1865	15.4339	38.8302	15.6382	9.93761	26.025	19.1059	20.8034	32.0532	28.025	18.616	58.841
ENSMUSG00000016308	Ube2a	256.568	257.486	252.092	202.519	258.894	276.931	221.736	244.934	273.719	354.611	332.592	379.515	263.616	326.976	304.986	261.756	372.906	294.24	258.468	374.715	318.892	284.601	285.323	252.608	251.287	463.674	529.388
ENSMUSG00000016319	Slc25a5	1459.57	1408.28	1368.93	1553.99	1275.12	1282.08	1482.64	1651.65	1380.61	2617.36	2253.15	2105.97	2017.14	1988.18	1624.5	1575.32	1710.94	1511.15	1447.42	2109	1598.99	2207.5	1161.48	1092.15	1652.45	2497.81	3476.79
ENSMUSG00000016327	Atp1b4	26.2944	15.7325	15.2679	13.4068	14.3493	13.1841	14.0368	16.4093	9.93761	9.93761	9.93761	17.377	21.6556	16.2148	13.6478	23.0791	17.0031	14.7908	30.1018	13.8809	19.8798	15.8406	13.5127	14.9767	22.0715	9.93761	17.5405
ENSMUSG00000016344	Ppdpf	130.023	105.384	118.599	110.548	73.4641	131.04	132.854	133.996	170.887	268.216	127.416	116.701	249.858	123.569	130.062	205.531	47.14	92.0558	179.334	87.0733	100.436	247.152	99.2809	131.874	120.785	60.7285	52.0303
ENSMUSG00000016346	Kcnq2	13.6667	13.7713	9.93761	9.93761	9.93761	9.93761	19.6336	9.93761	9.93761	13.4737	9.93761	9.93761	9.93761	9.93761	9.93761	9.93761	9.93761	13.1767	15.6382	9.93761	9.93761	9.93761	9.93761	13.2947	9.93761	15.5452	9.93761
ENSMUSG00000016349	Eef1a2	15.5658	9.93761	19.45	15.1536	9.93761	13.1841	9.93761	21.1647	13.9743	13.4737	9.93761	9.93761	20.2925	14.0727	19.974	9.93761	9.93761	13.1767	9.93761	9.93761	13.6175	9.93761	13.5127	9.93761	19.9208	9.93761	13.8362
ENSMUSG00000016356	Col20a1	102.345	102.153	486.751	82.4138	114.638	253.715	89.3981	99.7107	162.695	64.751	86.6625	138.065	87.4364	128.459	471.52	97.4319	150.359	180.965	126.111	109.711	122.491	60.0257	103.101	143.804	102.293	138.509	207.24
ENSMUSG00000016382	Pls3	859.197	803.105	1416.39	707.376	1017.39	2309.36	623.043	1376.83	2419.61	862.402	1224.12	2179.23	515.313	1046.48	1519.6	690.385	1084.56	1410.03	463.324	1116.46	1933.13	599.35	1068.77	1699.16	831.907	1420.62	1922.41
ENSMUSG00000016386	Mpped2	43.017	72.9506	26.3642	56.7358	47.6426	20.7004	90.6099	50.2399	29.3356	27.4083	63.2935	26.8079	36.1666	57.0244	23.7935	71.8156	32.4946	21.6925	59.7842	45.7202	29.4496	79.1208	53.0101	17.6805	19.9208	23.8208	19.0982
ENSMUSG00000016409	Nkap	214.775	194.394	210.144	260.08	190.939	287.336	272.095	249.195	252.699	200.346	225.053	222.206	188.436	189.458	201.943	258.009	216.129	218.481	229.327	241.266	253.179	305.522	234.17	239.022	181.093	267.303	242.461
ENSMUSG00000016427	Ndufa1	152.52	109.69	154.148	165.604	90.6739	103.661	123.219	112.586	112.282	201.276	141.261	145.533	134.329	116.228	89.3724	159.56	86.2577	82.3749	155.351	101.8	96.4174	205.275	74.3544	76.2248	120.785	78.2874	130.063
ENSMUSG00000016458	Wt1	15.5658	13.7713	34.7082	25.9433	15.565	24.6649	29.7202	13.3017	21.0038	13.4737	9.93761	18.8954	20.2925	14.0727	21.2877	18.1865	17.0031	40.5293	17.2759	13.8809	27.1808	9.93761	9.93761	18.8843	19.9208	9.93761	48.6009
[truncated: 29,089 more rows]
