# Supplementary material
Source: Research Square preprint supplement (doi:10.21203/rs.3.rs-9812305/v1)
Supplement: Supplementary file 9 [file 9347eacd375eb06e9b6cb6d4.xlsx]

## Sheet: Sheet1
Table 7. List of upregulated genes in uterus
Upregulated genes upon E2 in epith. Of uterus			Upregulated genes upon E4low in epith. Of uterus			Upregulated genes upon E4Hi in epith. Of uterus			Upregulated genes upon E2 in fibro. Of uterus			Upregulated genes upon E4low in fibro. Of uterus			Upregulated genes upon E4Hi in fibro. Of uterus
Gene-ID	Gene-Name	Fold change E2/OVX	Gene-ID	Gene-Name	Fold change E4low/OVX	Gene-ID	Gene-Name	Fold change E4Hi/OVX	Gene-ID	Gene-Name	Fold change E2/OVX	Gene-ID	Gene-Name	Fold change E4low/OVX	Gene-ID	Gene-Name	Fold change E4Hi/OVX
ENSMUSG00000000088	Cox5a	2.91194	ENSMUSG00000000088	Cox5a	2.95988	ENSMUSG00000000088	Cox5a	2.73581	ENSMUSG00000000088	Cox5a	2.74532	ENSMUSG00000000120	Ngfr	42.3945	ENSMUSG00000000120	Ngfr	61.2431
ENSMUSG00000000154	Slc22a18	2.81699	ENSMUSG00000000154	Slc22a18	3.06536	ENSMUSG00000000154	Slc22a18	2.33333	ENSMUSG00000000120	Ngfr	35.3646	ENSMUSG00000000223	Drp2	3.63946	ENSMUSG00000000223	Drp2	4.8322
ENSMUSG00000000204	Slfn4	11.1176	ENSMUSG00000000171	Sdhd	2.16499	ENSMUSG00000000295	Hddc2	2.52523	ENSMUSG00000000171	Sdhd	2.57564	ENSMUSG00000000392	Fap	15.4386	ENSMUSG00000000392	Fap	24.1404
ENSMUSG00000000266	Mid2	2.18955	ENSMUSG00000000202	Btbd17	3.84	ENSMUSG00000000305	Cdh4	8.9932	ENSMUSG00000000223	Drp2	3.86168	ENSMUSG00000000753	Serpinf1	3.89013	ENSMUSG00000000552	Zfp385a	2.65734
ENSMUSG00000000275	Trim25	3.23382	ENSMUSG00000000204	Slfn4	15.2059	ENSMUSG00000000308	Ckmt1	16.2828	ENSMUSG00000000326	Comt	2.56917	ENSMUSG00000000901	Mmp11	4.56271	ENSMUSG00000000693	Loxl3	2.39119
ENSMUSG00000000305	Cdh4	2.86395	ENSMUSG00000000275	Trim25	2.79698	ENSMUSG00000000386	Mx1	9.43836	ENSMUSG00000000355	Mcts1	2.61125	ENSMUSG00000001027	Scn4a	14.8125	ENSMUSG00000000739	Sult5a1	8.91667
ENSMUSG00000000308	Ckmt1	13.7954	ENSMUSG00000000308	Ckmt1	12.4069	ENSMUSG00000000532	Acvr1b	2.52716	ENSMUSG00000000392	Fap	27.5526	ENSMUSG00000001029	Icam2	4.08333	ENSMUSG00000000982	Ccl3	53.1172
ENSMUSG00000000386	Mx1	19.6849	ENSMUSG00000000386	Mx1	28.2603	ENSMUSG00000000631	Myo18a	2.51204	ENSMUSG00000000402	Egfl6	2.3481	ENSMUSG00000001119	Col6a1	8.41461	ENSMUSG00000001020	S100a4	36.125
ENSMUSG00000000440	Pparg	5.16667	ENSMUSG00000000440	Pparg	2.88596	ENSMUSG00000000743	Chmp1a	2.62308	ENSMUSG00000000605	Clcn4	2.40223	ENSMUSG00000001240	Ramp2	4.29875	ENSMUSG00000001025	S100a6	3.45117
ENSMUSG00000000489	Pdgfb	2.59288	ENSMUSG00000000489	Pdgfb	2.56234	ENSMUSG00000000753	Serpinf1	4.02865	ENSMUSG00000000690	Hoxb6	4.43396	ENSMUSG00000001334	Fndc5	4.69048	ENSMUSG00000001119	Col6a1	9.65325
ENSMUSG00000000594	Gm2a	2.35506	ENSMUSG00000000743	Chmp1a	2.43553	ENSMUSG00000000983	Wfdc18	27.5833	ENSMUSG00000000693	Loxl3	2.10314	ENSMUSG00000001418	Glmp	2.76724	ENSMUSG00000001131	Timp1	2.24703
ENSMUSG00000000743	Chmp1a	2.30658	ENSMUSG00000000753	Serpinf1	3.26218	ENSMUSG00000001027	Scn4a	4.69474	ENSMUSG00000000739	Sult5a1	8.69444	ENSMUSG00000001506	Col1a1	20.9672	ENSMUSG00000001240	Ramp2	4.08318
ENSMUSG00000000983	Wfdc18	98.25	ENSMUSG00000000983	Wfdc18	62.0833	ENSMUSG00000001123	Lgals9	3.07843	ENSMUSG00000000982	Ccl3	53.1172	ENSMUSG00000001555	Fkbp10	3.18963	ENSMUSG00000001334	Fndc5	3.43452
ENSMUSG00000001027	Scn4a	6.23684	ENSMUSG00000001027	Scn4a	5.71053	ENSMUSG00000001156	Mxd1	3.45101	ENSMUSG00000001020	S100a4	117.708	ENSMUSG00000001739	Cldn15	11.3103	ENSMUSG00000001348	Acp5	46.0909
ENSMUSG00000001123	Lgals9	6.46078	ENSMUSG00000001120	Pcbp3	2.73967	ENSMUSG00000001348	Acp5	17.2292	ENSMUSG00000001025	S100a6	5.61824	ENSMUSG00000001751	Naglu	3.53546	ENSMUSG00000001418	Glmp	2.65805
ENSMUSG00000001156	Mxd1	9.92886	ENSMUSG00000001123	Lgals9	11.3529	ENSMUSG00000001418	Glmp	3.12705	ENSMUSG00000001054	Rmnd5b	2.50892	ENSMUSG00000001864	Aif1l	3.39768	ENSMUSG00000001506	Col1a1	11.1314
ENSMUSG00000001348	Acp5	21.0521	ENSMUSG00000001156	Mxd1	5.93244	ENSMUSG00000001420	Tmem79	2.56347	ENSMUSG00000001119	Col6a1	7.22867	ENSMUSG00000002266	Zim1	5.14583	ENSMUSG00000001555	Fkbp10	4.22756
ENSMUSG00000001418	Glmp	2.70355	ENSMUSG00000001247	Lsr	2.14264	ENSMUSG00000001763	Tspan33	8.25466	ENSMUSG00000001131	Timp1	3.09026	ENSMUSG00000002289	Angptl4	3.74399	ENSMUSG00000001657	Hoxc8	19.1429
ENSMUSG00000001763	Tspan33	10.0062	ENSMUSG00000001348	Acp5	21.1458	ENSMUSG00000001924	Uba1	2.21716	ENSMUSG00000001228	Uhrf1	2.40146	ENSMUSG00000002308	Cd320	4.14912	ENSMUSG00000001665	Gstt3	2.04348
ENSMUSG00000001794	Capns1	2.37368	ENSMUSG00000001418	Glmp	3.28552	ENSMUSG00000002014	Ssr4	2.48226	ENSMUSG00000001240	Ramp2	2.78354	ENSMUSG00000002329	Mdp1	2.08989	ENSMUSG00000001666	Ddt	2.17986
ENSMUSG00000002014	Ssr4	2.6117	ENSMUSG00000001420	Tmem79	2.31579	ENSMUSG00000002228	Ppm1j	4.46	ENSMUSG00000001247	Lsr	13.8621	ENSMUSG00000002332	Dhrs1	2.18386	ENSMUSG00000001739	Cldn15	44.6782
ENSMUSG00000002228	Ppm1j	8.42	ENSMUSG00000001506	Col1a1	4.3322	ENSMUSG00000002329	Mdp1	2.48927	ENSMUSG00000001333	Sync	2.95227	ENSMUSG00000002550	Uck1	4.739	ENSMUSG00000001751	Naglu	6.41135
ENSMUSG00000002233	Rhoc	3.04949	ENSMUSG00000001642	Akr1b3	3.33718	ENSMUSG00000002332	Dhrs1	3.26794	ENSMUSG00000001348	Acp5	80.4545	ENSMUSG00000002732	Fkbp7	2.5625	ENSMUSG00000001794	Capns1	2.68712
ENSMUSG00000002329	Mdp1	2.62232	ENSMUSG00000001750	Tcirg1	2.5556	ENSMUSG00000002379	Ndufa11	2.50992	ENSMUSG00000001418	Glmp	2.52874	ENSMUSG00000002847	Pla1a	83.7045	ENSMUSG00000001827	Folr1	67.7778
ENSMUSG00000002332	Dhrs1	4.33971	ENSMUSG00000001751	Naglu	2.47343	ENSMUSG00000002580	Mien1	2.00813	ENSMUSG00000001506	Col1a1	9.46865	ENSMUSG00000002885	Adgre5	7.99536	ENSMUSG00000001986	Gria3	2.73455
ENSMUSG00000002379	Ndufa11	3.18056	ENSMUSG00000001763	Tspan33	9.31677	ENSMUSG00000002733	Plekha3	2.30865	ENSMUSG00000001507	Itga3	4.40202	ENSMUSG00000002897	Il17ra	2.02221	ENSMUSG00000002014	Ssr4	2.15156
ENSMUSG00000002458	Rgs19	2.61453	ENSMUSG00000002014	Ssr4	2.72387	ENSMUSG00000002885	Adgre5	8.62661	ENSMUSG00000001555	Fkbp10	4.49305	ENSMUSG00000003228	Grk5	2.8016	ENSMUSG00000002289	Angptl4	3.17067
ENSMUSG00000002565	Scin	2.67748	ENSMUSG00000002228	Ppm1j	7.32	ENSMUSG00000002900	Lamb1	4.63427	ENSMUSG00000001642	Akr1b3	3.13553	ENSMUSG00000003352	Cacnb3	2.76393	ENSMUSG00000002308	Cd320	6.68421
ENSMUSG00000002580	Mien1	2.4607	ENSMUSG00000002233	Rhoc	2.46569	ENSMUSG00000002997	Prkar2b	3.47159	ENSMUSG00000001657	Hoxc8	36.1429	ENSMUSG00000003355	Fkbp11	4.41538	ENSMUSG00000002329	Mdp1	2.97753
ENSMUSG00000002768	Mea1	2.06331	ENSMUSG00000002307	Daxx	2.12743	ENSMUSG00000003051	Elf3	2.23318	ENSMUSG00000001661	Hoxc6	6.57944	ENSMUSG00000003363	Pld3	2.7267	ENSMUSG00000002332	Dhrs1	3.38565
ENSMUSG00000002885	Adgre5	5.39325	ENSMUSG00000002329	Mdp1	2.4206	ENSMUSG00000003309	Ap1m2	2.41984	ENSMUSG00000001666	Ddt	2.2446	ENSMUSG00000003810	Mast2	2.55098	ENSMUSG00000002458	Rgs19	4.60484
ENSMUSG00000002900	Lamb1	3.70465	ENSMUSG00000002332	Dhrs1	3.55024	ENSMUSG00000003346	Abhd17a	2.13014	ENSMUSG00000001739	Cldn15	70.4483	ENSMUSG00000003812	Dnase2a	2.46053	ENSMUSG00000002550	Uck1	4.61912
ENSMUSG00000002997	Prkar2b	4.96023	ENSMUSG00000002379	Ndufa11	2.47817	ENSMUSG00000003354	Ccdc65	2.73418	ENSMUSG00000001741	Il16	3.15818	ENSMUSG00000004098	Col5a3	5.9636	ENSMUSG00000002603	Tgfb1	2.33214
ENSMUSG00000003051	Elf3	2.67599	ENSMUSG00000002580	Mien1	2.13279	ENSMUSG00000003355	Fkbp11	13.7975	ENSMUSG00000001751	Naglu	5.56383	ENSMUSG00000004105	Angptl2	2.73618	ENSMUSG00000002732	Fkbp7	2.15203
ENSMUSG00000003309	Ap1m2	2.3497	ENSMUSG00000002778	Kdelr1	2.22715	ENSMUSG00000003363	Pld3	2.73212	ENSMUSG00000001794	Capns1	2.89059	ENSMUSG00000004415	Col26a1	3.91176	ENSMUSG00000002808	Epdr1	2.4397
ENSMUSG00000003355	Fkbp11	9.73418	ENSMUSG00000002885	Adgre5	6.31182	ENSMUSG00000003458	Ncstn	3.19524	ENSMUSG00000001827	Folr1	176.444	ENSMUSG00000004473	Clec11a	3.14167	ENSMUSG00000002847	Pla1a	70.3409
ENSMUSG00000003363	Pld3	2.22887	ENSMUSG00000002900	Lamb1	2.93758	ENSMUSG00000003469	Phyhip	10.5	ENSMUSG00000001946	Esam	7.41096	ENSMUSG00000004791	Pgf	6.04762	ENSMUSG00000002885	Adgre5	5.43155
ENSMUSG00000003458	Ncstn	3.17815	ENSMUSG00000002997	Prkar2b	5.36364	ENSMUSG00000003617	Cp	5.6505	ENSMUSG00000001986	Gria3	2.43455	ENSMUSG00000005043	Sgsh	2.51351	ENSMUSG00000002900	Lamb1	2.15804
ENSMUSG00000003812	Dnase2a	3.05221	ENSMUSG00000003051	Elf3	2.56229	ENSMUSG00000003812	Dnase2a	4.11647	ENSMUSG00000002014	Ssr4	2.47903	ENSMUSG00000005142	Man2b1	2.45553	ENSMUSG00000003228	Grk5	2.3952
ENSMUSG00000004347	Pde1c	2.2193	ENSMUSG00000003309	Ap1m2	2.58918	ENSMUSG00000003865	Gys1	2.60963	ENSMUSG00000002017	Fam98a	2.80587	ENSMUSG00000005268	Prlr	8.70098	ENSMUSG00000003352	Cacnb3	2.79178
ENSMUSG00000004552	Ctse	7.12658	ENSMUSG00000003346	Abhd17a	2.03653	ENSMUSG00000003934	Efnb3	6.36538	ENSMUSG00000002020	Ltbp2	6.45	ENSMUSG00000005397	Nid1	2.59079	ENSMUSG00000003355	Fkbp11	3.70769
ENSMUSG00000004633	Chn2	13.297	ENSMUSG00000003355	Fkbp11	5.56962	ENSMUSG00000004221	Ikbkg	2.46943	ENSMUSG00000002289	Angptl4	3.54018	ENSMUSG00000005413	Hmox1	6.97147	ENSMUSG00000003363	Pld3	3.67594
ENSMUSG00000004849	Ap1s1	4.47143	ENSMUSG00000003363	Pld3	2.35761	ENSMUSG00000004347	Pde1c	2.58772	ENSMUSG00000002308	Cd320	8.00877	ENSMUSG00000005481	Ddx39	3.53905	ENSMUSG00000003469	Phyhip	26.5143
ENSMUSG00000004864	Mapk13	2.90216	ENSMUSG00000003402	Prkcsh	2.01318	ENSMUSG00000004552	Ctse	9.35443	ENSMUSG00000002329	Mdp1	3.51685	ENSMUSG00000005686	Ampd3	4.8546	ENSMUSG00000003484	Cyp4f18	133.831
ENSMUSG00000004885	Crabp2	4.60265	ENSMUSG00000003458	Ncstn	3.32367	ENSMUSG00000004626	Stxbp2	2.15865	ENSMUSG00000002332	Dhrs1	4.287	ENSMUSG00000006205	Htra1	9.00675	ENSMUSG00000003518	Dusp3	2.32544
ENSMUSG00000004936	Map2k1	3.47288	ENSMUSG00000003617	Cp	5.71516	ENSMUSG00000004633	Chn2	3.40099	ENSMUSG00000002379	Ndufa11	2.31231	ENSMUSG00000006342	Susd2	3.14	ENSMUSG00000003528	Slc25a1	2.48077
ENSMUSG00000004952	Rasa4	34.0425	ENSMUSG00000003644	Rps6ka1	2.54631	ENSMUSG00000004849	Ap1s1	3.76857	ENSMUSG00000002458	Rgs19	6.04839	ENSMUSG00000006344	Ggt5	8.42708	ENSMUSG00000003810	Mast2	3.35131
ENSMUSG00000004988	Fxyd4	3.03702	ENSMUSG00000003812	Dnase2a	2.72691	ENSMUSG00000004864	Mapk13	2.97403	ENSMUSG00000002489	Tiam1	2.59459	ENSMUSG00000006463	Zdhhc24	2.12264	ENSMUSG00000003873	Bax	2.24903
ENSMUSG00000005125	Ndrg1	2.83667	ENSMUSG00000003865	Gys1	2.42424	ENSMUSG00000004885	Crabp2	5.40397	ENSMUSG00000002550	Uck1	3.81335	ENSMUSG00000006731	B4galnt1	2.88362	ENSMUSG00000003948	Mmd	2.27874
ENSMUSG00000005225	Plekha8	2.55893	ENSMUSG00000004552	Ctse	6.63291	ENSMUSG00000004936	Map2k1	5.0942	ENSMUSG00000002603	Tgfb1	2.4098	ENSMUSG00000006800	Sulf2	5.66538	ENSMUSG00000003955	Fam162a	2.16892
ENSMUSG00000005364	Il5ra	21150	ENSMUSG00000004633	Chn2	9.22277	ENSMUSG00000004952	Rasa4	32.4324	ENSMUSG00000002732	Fkbp7	2.10304	ENSMUSG00000007440	Pcdha11	4.60894	ENSMUSG00000004032	Gstm5	5.20792
ENSMUSG00000005481	Ddx39	2.50678	ENSMUSG00000004849	Ap1s1	4.07429	ENSMUSG00000005043	Sgsh	3.54	ENSMUSG00000002767	Mrpl2	2.10698	ENSMUSG00000007653	Gabrb2	16.3385	ENSMUSG00000004098	Col5a3	5.55207
ENSMUSG00000005873	Reep5	2.43236	ENSMUSG00000004864	Mapk13	3.4658	ENSMUSG00000005078	Jkamp	2.07635	ENSMUSG00000002847	Pla1a	56.1818	ENSMUSG00000007682	Dio2	4.71372	ENSMUSG00000004105	Angptl2	2.26643
ENSMUSG00000005881	Ergic3	2.00307	ENSMUSG00000004885	Crabp2	3.2649	ENSMUSG00000005364	Il5ra	19450	ENSMUSG00000002885	Adgre5	4.0495	ENSMUSG00000008036	Ap2s1	2.66535	ENSMUSG00000004626	Stxbp2	3.41502
ENSMUSG00000006143	Upk3bl	23.94	ENSMUSG00000004936	Map2k1	3.40723	ENSMUSG00000005481	Ddx39	3.22216	ENSMUSG00000002980	Bcam	6.35183	ENSMUSG00000009185	Ccl8	60.7222	ENSMUSG00000004791	Pgf	14.2857
ENSMUSG00000006169	Clint1	2.63663	ENSMUSG00000004952	Rasa4	37.1467	ENSMUSG00000005553	Atp4a	18.6667	ENSMUSG00000003352	Cacnb3	2.89523	ENSMUSG00000009378	Slc16a12	14.9722	ENSMUSG00000004849	Ap1s1	2.88261
ENSMUSG00000006273	Atp6v1b2	3.11212	ENSMUSG00000005125	Ndrg1	2.68115	ENSMUSG00000005609	Ctr9	3.07787	ENSMUSG00000003355	Fkbp11	4.4	ENSMUSG00000009731	Kcnd1	3.23846	ENSMUSG00000005043	Sgsh	4.58559
ENSMUSG00000006369	Fbln1	2.8634	ENSMUSG00000005142	Man2b1	2.07514	ENSMUSG00000005823	Gpr108	2.51163	ENSMUSG00000003363	Pld3	3.51182	ENSMUSG00000010307	Tmem86a	12.005	ENSMUSG00000005268	Prlr	51.2941
ENSMUSG00000006411	Nectin4	2.63146	ENSMUSG00000005364	Il5ra	13500	ENSMUSG00000005881	Ergic3	2.01126	ENSMUSG00000003469	Phyhip	42.0571	ENSMUSG00000010830	Kdelr3	3.82853	ENSMUSG00000005413	Hmox1	4.8716
ENSMUSG00000006519	Cyba	5.60553	ENSMUSG00000005481	Ddx39	3.0607	ENSMUSG00000005951	Shpk	5.04688	ENSMUSG00000003484	Cyp4f18	147.761	ENSMUSG00000011256	Adam19	2.88299	ENSMUSG00000005683	Cs	2.24274
ENSMUSG00000006731	B4galnt1	11.5251	ENSMUSG00000005609	Ctr9	2.21054	ENSMUSG00000006143	Upk3bl	10.82	ENSMUSG00000003518	Dusp3	2.98291	ENSMUSG00000012017	Scarf2	4.33305	ENSMUSG00000005686	Ampd3	5.15404
ENSMUSG00000006800	Sulf2	2.47393	ENSMUSG00000005674	Tomm40l	2.33333	ENSMUSG00000006169	Clint1	2.61893	ENSMUSG00000003528	Slc25a1	2.52115	ENSMUSG00000012519	Mlkl	2.89908	ENSMUSG00000005836	Gata6	8.5931
ENSMUSG00000007034	Slc44a4	7.63525	ENSMUSG00000005677	Nr1i3	2.48193	ENSMUSG00000006273	Atp6v1b2	2.52967	ENSMUSG00000003534	Ddr1	4.91921	ENSMUSG00000013584	Aldh1a2	9.26352	ENSMUSG00000005873	Reep5	2.02837
ENSMUSG00000007041	Clic1	2.43858	ENSMUSG00000005873	Reep5	2.50942	ENSMUSG00000006315	Tmem147	2.06222	ENSMUSG00000003644	Rps6ka1	5.35526	ENSMUSG00000014776	Nol3	4.30189	ENSMUSG00000006205	Htra1	4
ENSMUSG00000007097	Atp1a2	2.43514	ENSMUSG00000005881	Ergic3	2.12999	ENSMUSG00000006369	Fbln1	2.61374	ENSMUSG00000003810	Mast2	3.33039	ENSMUSG00000014837	4931428F04Rik	2.33071	ENSMUSG00000006315	Tmem147	2.42991
ENSMUSG00000007207	Stx1a	3.7234	ENSMUSG00000006143	Upk3bl	11.91	ENSMUSG00000006471	Ndor1	2.15809	ENSMUSG00000003873	Bax	2.5214	ENSMUSG00000015085	Entpd2	3.09651	ENSMUSG00000006342	Susd2	2.59091
ENSMUSG00000007458	M6pr	2.81763	ENSMUSG00000006169	Clint1	2.93436	ENSMUSG00000006519	Cyba	3.92211	ENSMUSG00000003948	Mmd	4.18846	ENSMUSG00000015094	Npdc1	2.05556	ENSMUSG00000006344	Ggt5	10.362
ENSMUSG00000007721	Ccdc124	2.15779	ENSMUSG00000006205	Htra1	2.42548	ENSMUSG00000006731	B4galnt1	13.4883	ENSMUSG00000003955	Fam162a	2.38514	ENSMUSG00000015243	Abca1	2.2799	ENSMUSG00000006360	Crip1	8.19811
ENSMUSG00000007888	Crlf1	30.4667	ENSMUSG00000006273	Atp6v1b2	3.44129	ENSMUSG00000007034	Slc44a4	8.97814	ENSMUSG00000004032	Gstm5	10.9842	ENSMUSG00000015289	Lage3	3.08955	ENSMUSG00000006390	Elovl1	2.59921
ENSMUSG00000007908	Hmgcll1	2.45652	ENSMUSG00000006369	Fbln1	4.65377	ENSMUSG00000007097	Atp1a2	5.04054	ENSMUSG00000004098	Col5a3	4.53084	ENSMUSG00000015568	Lpl	8.28864	ENSMUSG00000006457	Actn3	3.3
ENSMUSG00000008036	Ap2s1	2.26151	ENSMUSG00000006519	Cyba	4.57789	ENSMUSG00000007458	M6pr	2.95251	ENSMUSG00000004473	Clec11a	3.85	ENSMUSG00000015575	Atp6v0e	2.40028	ENSMUSG00000006463	Zdhhc24	3.16981
ENSMUSG00000008090	Fgfrl1	3.71731	ENSMUSG00000006731	B4galnt1	7.64548	ENSMUSG00000007721	Ccdc124	2.12167	ENSMUSG00000004610	Etfb	2.92338	ENSMUSG00000015668	Pdzd11	2.14094	ENSMUSG00000006800	Sulf2	8.23269
ENSMUSG00000008398	Elk3	2.61612	ENSMUSG00000006800	Sulf2	3.20432	ENSMUSG00000007817	Zmiz1	2.56425	ENSMUSG00000004626	Stxbp2	5.89328	ENSMUSG00000015880	Ncapg	3.08108	ENSMUSG00000006931	P3h4	3.87216
ENSMUSG00000008475	Arpc5	3.34152	ENSMUSG00000007034	Slc44a4	8.21858	ENSMUSG00000007888	Crlf1	80.0667	ENSMUSG00000004791	Pgf	8.97619	ENSMUSG00000016024	Lbp	8.25445	ENSMUSG00000007041	Clic1	3.14883
ENSMUSG00000008601	Rab25	2.98936	ENSMUSG00000007041	Clic1	2.50422	ENSMUSG00000008035	Mid1ip1	2.50236	ENSMUSG00000004849	Ap1s1	3.74783	ENSMUSG00000016179	Camk1g	2.4065	ENSMUSG00000007440	Pcdha11	3.32402
ENSMUSG00000009356	Lpo	114.083	ENSMUSG00000007207	Stx1a	3.60638	ENSMUSG00000008036	Ap2s1	2.22099	ENSMUSG00000004936	Map2k1	3.0168	ENSMUSG00000016252	Atp5e	2.68722	ENSMUSG00000007653	Gabrb2	4.4
ENSMUSG00000009563	Tor2a	3.55634	ENSMUSG00000007458	M6pr	3.16185	ENSMUSG00000008090	Fgfrl1	3.36219	ENSMUSG00000004996	Mri1	2.90667	ENSMUSG00000016477	E2f3	2.48315	ENSMUSG00000007721	Ccdc124	2.0843
ENSMUSG00000009828	Ick	3.83801	ENSMUSG00000007888	Crlf1	30.8667	ENSMUSG00000008398	Elk3	2.43297	ENSMUSG00000005043	Sgsh	4.6036	ENSMUSG00000016487	Ppfibp1	4.02357	ENSMUSG00000007783	Cpt1c	2.39938
ENSMUSG00000010601	Apol7a	32.4516	ENSMUSG00000007891	Ctsd	2.1312	ENSMUSG00000008475	Arpc5	2.53999	ENSMUSG00000005054	Cstb	2.09449	ENSMUSG00000016494	Cd34	2.48128	ENSMUSG00000007891	Ctsd	2.24262
ENSMUSG00000010607	Pigyl	3.18705	ENSMUSG00000007908	Hmgcll1	2.60145	ENSMUSG00000008601	Rab25	3.05623	ENSMUSG00000005142	Man2b1	4.70823	ENSMUSG00000016624	Phf21b	22.5714	ENSMUSG00000008036	Ap2s1	3.53937
ENSMUSG00000011034	Slc5a1	19.339	ENSMUSG00000008036	Ap2s1	2.53407	ENSMUSG00000009090	Ap1b1	2.00096	ENSMUSG00000005268	Prlr	30.2402	ENSMUSG00000016995	Matn4	3.80184	ENSMUSG00000008398	Elk3	2.85994
ENSMUSG00000011752	Pgam1	4.8587	ENSMUSG00000008090	Fgfrl1	3.52297	ENSMUSG00000009356	Lpo	220.667	ENSMUSG00000005413	Hmox1	5.17639	ENSMUSG00000017344	Vtn	3.93734	ENSMUSG00000009090	Ap1b1	2.13298
ENSMUSG00000011884	Gltp	2.30365	ENSMUSG00000008398	Elk3	2.55751	ENSMUSG00000009563	Tor2a	3.78169	ENSMUSG00000005683	Cs	2.26183	ENSMUSG00000017417	Plxdc1	2.5256	ENSMUSG00000009185	Ccl8	99.3889
ENSMUSG00000012187	Mogat1	14.9877	ENSMUSG00000008475	Arpc5	2.9771	ENSMUSG00000009575	Cbx5	2.25923	ENSMUSG00000005686	Ampd3	4.64718	ENSMUSG00000017446	C1qtnf1	3.40835	ENSMUSG00000009378	Slc16a12	14.6389
ENSMUSG00000012519	Mlkl	4.32515	ENSMUSG00000008601	Rab25	3.19757	ENSMUSG00000010307	Tmem86a	3.43784	ENSMUSG00000005836	Gata6	13.1747	ENSMUSG00000017830	Dhx58	9.04762	ENSMUSG00000009614	Sardh	4.26913
ENSMUSG00000013236	Ptprs	4.6884	ENSMUSG00000009356	Lpo	85.4167	ENSMUSG00000010601	Apol7a	40.6452	ENSMUSG00000005873	Reep5	2.24887	ENSMUSG00000017969	Ptgis	4.69957	ENSMUSG00000009687	Fxyd5	4.37612
ENSMUSG00000013338	Fer1l4	48.8793	ENSMUSG00000009563	Tor2a	3.15845	ENSMUSG00000010607	Pigyl	3.58993	ENSMUSG00000005968	Tuft1	3.37793	ENSMUSG00000018102	Hist1h2bc	2.40972	ENSMUSG00000009731	Kcnd1	3.70769
ENSMUSG00000013643	Lypd8	7.51287	ENSMUSG00000009828	Ick	3.8567	ENSMUSG00000011034	Slc5a1	9.77966	ENSMUSG00000006014	Prg4	3.27984	ENSMUSG00000018339	Gpx3	2.25244	ENSMUSG00000009863	Sdhb	2.51456
ENSMUSG00000013698	Pea15a	5.22545	ENSMUSG00000010307	Tmem86a	2.37838	ENSMUSG00000011752	Pgam1	4.19565	ENSMUSG00000006095	Tbcb	2.37529	ENSMUSG00000018585	Atox1	2.43842	ENSMUSG00000010051	Hyal1	2.17108
ENSMUSG00000013787	Ehmt2	2.23744	ENSMUSG00000010358	Ifi35	2.45392	ENSMUSG00000011884	Gltp	3.17048	ENSMUSG00000006205	Htra1	2.54385	ENSMUSG00000018593	Sparc	13.3153	ENSMUSG00000010307	Tmem86a	7.56281
ENSMUSG00000014077	Chp1	4.1573	ENSMUSG00000010601	Apol7a	34.2903	ENSMUSG00000013236	Ptprs	5.00312	ENSMUSG00000006221	Hspb7	6.16863	ENSMUSG00000018920	Cxcl16	7.29681	ENSMUSG00000010601	Apol7a	55.3616
ENSMUSG00000014748	Tex261	2.27989	ENSMUSG00000011034	Slc5a1	16.5339	ENSMUSG00000013338	Fer1l4	50.319	ENSMUSG00000006315	Tmem147	2.96885	ENSMUSG00000018931	Natd1	3.23659	ENSMUSG00000011256	Adam19	2.88029
ENSMUSG00000015335	Zdhhc12	3.78689	ENSMUSG00000011752	Pgam1	4.46377	ENSMUSG00000013643	Lypd8	27.2039	ENSMUSG00000006344	Ggt5	8.43663	ENSMUSG00000019055	Plod1	5.65212	ENSMUSG00000012017	Scarf2	6.31879
ENSMUSG00000015341	Golga7	2.32267	ENSMUSG00000012187	Mogat1	9.14815	ENSMUSG00000013698	Pea15a	7.63764	ENSMUSG00000006356	Crip2	2.31476	ENSMUSG00000019124	Scrn1	2.57415	ENSMUSG00000012519	Mlkl	3.36697
ENSMUSG00000015478	Rnf5	2.30655	ENSMUSG00000012519	Mlkl	5.60123	ENSMUSG00000013787	Ehmt2	2.16037	ENSMUSG00000006360	Crip1	16.4764	ENSMUSG00000019194	Scn1b	2.52899	ENSMUSG00000013236	Ptprs	4.35601
ENSMUSG00000015488	Cacfd1	2.6048	ENSMUSG00000013236	Ptprs	4.76904	ENSMUSG00000014077	Chp1	3.65132	ENSMUSG00000006390	Elovl1	2.71561	ENSMUSG00000019278	Dpep1	19.225	ENSMUSG00000013483	Card14	3.72603
ENSMUSG00000015533	Itga2	3.95714	ENSMUSG00000013338	Fer1l4	57.0431	ENSMUSG00000014158	Trpv4	2.64052	ENSMUSG00000006445	Epha2	5.8441	ENSMUSG00000019326	Aoc3	2.87931	ENSMUSG00000013584	Aldh1a2	6.21433
ENSMUSG00000015652	Steap1	8.03922	ENSMUSG00000013698	Pea15a	5.02661	ENSMUSG00000014748	Tex261	2.32457	ENSMUSG00000006463	Zdhhc24	2.91509	ENSMUSG00000019359	Gdpd2	32.7672	ENSMUSG00000013846	St3gal1	3.52146
ENSMUSG00000015750	Aph1a	2.39552	ENSMUSG00000014077	Chp1	4.29844	ENSMUSG00000014867	Surf4	2.01036	ENSMUSG00000006576	Slc4a3	2.29711	ENSMUSG00000019528	Gyg	2.79003	ENSMUSG00000014158	Trpv4	5.08333
ENSMUSG00000015766	Eps8	4.474	ENSMUSG00000014748	Tex261	2.32326	ENSMUSG00000015027	Galns	3.11633	ENSMUSG00000006800	Sulf2	5.16	ENSMUSG00000019779	Frk	5.29368	ENSMUSG00000014599	Csf1	5.78471
ENSMUSG00000016179	Camk1g	2.9913	ENSMUSG00000014867	Surf4	2.31362	ENSMUSG00000015335	Zdhhc12	3.4918	ENSMUSG00000006931	P3h4	6.16082	ENSMUSG00000019785	Clvs2	2.07246	ENSMUSG00000014776	Nol3	6.35849
ENSMUSG00000016344	Ppdpf	2.71074	ENSMUSG00000015247	Nipsnap3b	2.37589	ENSMUSG00000015341	Golga7	2.19403	ENSMUSG00000007041	Clic1	3.36379	ENSMUSG00000019787	Trdn	16.25	ENSMUSG00000014837	4931428F04Rik	2.54331
ENSMUSG00000017002	Slpi	5.89264	ENSMUSG00000015341	Golga7	2.30277	ENSMUSG00000015363	Trabd	2.14024	ENSMUSG00000007655	Cav1	5.3338	ENSMUSG00000019810	Fuca2	5.03947	ENSMUSG00000014980	Tsen15	2.07077
ENSMUSG00000017697	Ada	9.52778	ENSMUSG00000015451	C4a	2.69534	ENSMUSG00000015478	Rnf5	2.69345	ENSMUSG00000007777	0610009B22Rik	2.64286	ENSMUSG00000019850	Tnfaip3	2.7209	ENSMUSG00000015340	Cybb	22.7778
ENSMUSG00000017760	Ctsa	2.70442	ENSMUSG00000015478	Rnf5	2.35417	ENSMUSG00000015519	2310057J18Rik	25905	ENSMUSG00000007783	Cpt1c	2.3808	ENSMUSG00000019944	Rhobtb1	2.45306	ENSMUSG00000015533	Itga2	3.33583
ENSMUSG00000017801	Mlx	2.06562	ENSMUSG00000015488	Cacfd1	2.86717	ENSMUSG00000015575	Atp6v0e	2.25949	ENSMUSG00000007867	Ift43	2.0396	ENSMUSG00000019997	Ctgf	3.73858	ENSMUSG00000015568	Lpl	18.6099
ENSMUSG00000017830	Dhx58	5.15038	ENSMUSG00000015575	Atp6v0e	2.22547	ENSMUSG00000015750	Aph1a	2.41604	ENSMUSG00000008036	Ap2s1	3.94882	ENSMUSG00000020100	Slc29a3	2.45681	ENSMUSG00000015575	Atp6v0e	3.18845
ENSMUSG00000018008	Cyth4	14.9362	ENSMUSG00000015652	Steap1	11.8627	ENSMUSG00000015766	Eps8	3.33066	ENSMUSG00000008398	Elk3	2.39032	ENSMUSG00000020101	Vsir	2.29086	ENSMUSG00000015627	Gata5	26.2857
ENSMUSG00000018102	Hist1h2bc	2.51877	ENSMUSG00000015653	Steap2	3.75231	ENSMUSG00000016179	Camk1g	4.58696	ENSMUSG00000008540	Mgst1	4.46773	ENSMUSG00000020121	Srgap1	3.70651	ENSMUSG00000015652	Steap1	26.5455
ENSMUSG00000018427	Ypel2	3.00138	ENSMUSG00000015750	Aph1a	2.64179	ENSMUSG00000016319	Slc25a5	2.49512	ENSMUSG00000008575	Nfib	3.15622	ENSMUSG00000020181	Nav3	3.06309	ENSMUSG00000015668	Pdzd11	2.26174
ENSMUSG00000018566	Slc2a4	4.68889	ENSMUSG00000015766	Eps8	4.30677	ENSMUSG00000016344	Ppdpf	2.62397	ENSMUSG00000009090	Ap1b1	2.50157	ENSMUSG00000020205	Phlda1	2.02789	ENSMUSG00000015759	Cnih1	3.1793
ENSMUSG00000018569	Cldn7	2.86825	ENSMUSG00000015944	Gatsl2	3.47015	ENSMUSG00000016520	Lnx2	2.68802	ENSMUSG00000009185	Ccl8	65.2222	ENSMUSG00000020219	Timm13	2.44755	ENSMUSG00000015880	Ncapg	3.18919
ENSMUSG00000018623	Mmp7	56.0625	ENSMUSG00000016319	Slc25a5	2.25195	ENSMUSG00000016942	Tmprss6	2.45783	ENSMUSG00000009376	Met	2.11396	ENSMUSG00000020232	Hmg20b	2.91079	ENSMUSG00000016024	Lbp	7.3452
ENSMUSG00000018648	Dusp14	2.8241	ENSMUSG00000016344	Ppdpf	2.58678	ENSMUSG00000017002	Slpi	3.72699	ENSMUSG00000009378	Slc16a12	15.4167	ENSMUSG00000020241	Col6a2	12.6938	ENSMUSG00000016252	Atp5e	3.13216
ENSMUSG00000018916	Csf2	35950	ENSMUSG00000016942	Tmprss6	5.07229	ENSMUSG00000017697	Ada	14.1694	ENSMUSG00000009614	Sardh	4.34037	ENSMUSG00000020256	Aldh1l2	7.05926	ENSMUSG00000016344	Ppdpf	2.43448
ENSMUSG00000018931	Natd1	3.63082	ENSMUSG00000017002	Slpi	4.95399	ENSMUSG00000017760	Ctsa	2.54338	ENSMUSG00000009687	Fxyd5	2.93134	ENSMUSG00000020308	Tpgs1	2.81699	ENSMUSG00000016427	Ndufa1	2.44388
ENSMUSG00000019087	Atp6ap1	3.03315	ENSMUSG00000017652	Cd40	6.21622	ENSMUSG00000017830	Dhx58	2.58647	ENSMUSG00000009731	Kcnd1	2.67692	ENSMUSG00000020325	Fstl3	2.29023	ENSMUSG00000016477	E2f3	3.42135
ENSMUSG00000019088	Dnase1l1	2.16232	ENSMUSG00000017697	Ada	10.3778	ENSMUSG00000018008	Cyth4	33.7447	ENSMUSG00000009863	Sdhb	2.56553	ENSMUSG00000020328	Nudcd2	3.80612	ENSMUSG00000016487	Ppfibp1	3.96864
ENSMUSG00000019158	Tmem160	3.02899	ENSMUSG00000017760	Ctsa	3.04156	ENSMUSG00000018339	Gpx3	7.43431	ENSMUSG00000010051	Hyal1	2.50265	ENSMUSG00000020340	Cyfip2	3.03084	ENSMUSG00000016494	Cd34	6.39082
ENSMUSG00000019210	Atp6v1e1	2.2147	ENSMUSG00000017801	Mlx	2.31759	ENSMUSG00000018623	Mmp7	98.6667	ENSMUSG00000010154	Spire2	163.184	ENSMUSG00000020431	Adcy1	10.6618	ENSMUSG00000016520	Lnx2	2.56591
ENSMUSG00000019232	Etnppl	6.02941	ENSMUSG00000017830	Dhx58	9.67669	ENSMUSG00000018648	Dusp14	2.7494	ENSMUSG00000010307	Tmem86a	7.15578	ENSMUSG00000020432	Tcn2	3.68982	ENSMUSG00000016624	Phf21b	18.9474
ENSMUSG00000019320	Noxo1	4.21569	ENSMUSG00000018008	Cyth4	16.3191	ENSMUSG00000018916	Csf2	20200	ENSMUSG00000010376	Nedd8	2.36541	ENSMUSG00000020473	Aebp1	2.86344	ENSMUSG00000016756	Cmah	16.4444
ENSMUSG00000019370	Calm3	2.18243	ENSMUSG00000018566	Slc2a4	8.44444	ENSMUSG00000018931	Natd1	3.32616	ENSMUSG00000010601	Apol7a	118.703	ENSMUSG00000020515	Cnot8	2.41826	ENSMUSG00000016757	Ttll12	2.47627
ENSMUSG00000019433	Gipc1	2.76872	ENSMUSG00000018569	Cldn7	3.03705	ENSMUSG00000019066	Rab3d	2.18284	ENSMUSG00000010607	Pigyl	7.44681	ENSMUSG00000020592	Sdc1	3.93885	ENSMUSG00000017002	Slpi	17.8438
ENSMUSG00000019487	Trip10	2.88586	ENSMUSG00000018623	Mmp7	77.3542	ENSMUSG00000019087	Atp6ap1	2.92472	ENSMUSG00000012017	Scarf2	3.73322	ENSMUSG00000020604	Arsg	3.29231	ENSMUSG00000017057	Il13ra1	3.3711
ENSMUSG00000019734	Tmc4	3.37303	ENSMUSG00000018648	Dusp14	3.38795	ENSMUSG00000019139	Isyna1	4.06477	ENSMUSG00000012483	Rpa3	2.39344	ENSMUSG00000020607	Fam84a	3.41897	ENSMUSG00000017188	Coa3	2.18797
ENSMUSG00000019779	Frk	2.13176	ENSMUSG00000018916	Csf2	19750	ENSMUSG00000019210	Atp6v1e1	2.47079	ENSMUSG00000012519	Mlkl	4.18349	ENSMUSG00000020614	Fam20a	2.59503	ENSMUSG00000017446	C1qtnf1	3.85693
ENSMUSG00000019810	Fuca2	2.48477	ENSMUSG00000018924	Alox15	5.29747	ENSMUSG00000019312	Grb7	2.32394	ENSMUSG00000012819	Cdh23	8.9	ENSMUSG00000020641	Rsad2	8.18868	ENSMUSG00000017664	Slc35c2	2.64017
ENSMUSG00000019832	Rab32	6.5619	ENSMUSG00000018931	Natd1	4.07527	ENSMUSG00000019320	Noxo1	6.01307	ENSMUSG00000013236	Ptprs	3.00756	ENSMUSG00000020642	Rnf144a	2.7701	ENSMUSG00000017721	Pigt	2.39742
ENSMUSG00000019850	Tnfaip3	6.23607	ENSMUSG00000019055	Plod1	2.26271	ENSMUSG00000019433	Gipc1	2.73877	ENSMUSG00000013483	Card14	3.73973	ENSMUSG00000020674	Pxdn	3.64167	ENSMUSG00000017830	Dhx58	6.16667
ENSMUSG00000019851	Perp	2.59204	ENSMUSG00000019066	Rab3d	2.22388	ENSMUSG00000019734	Tmc4	3.36384	ENSMUSG00000013584	Aldh1a2	5.34039	ENSMUSG00000020676	Ccl11	11.2077	ENSMUSG00000017969	Ptgis	18.2403
ENSMUSG00000019872	Smpdl3a	4.68845	ENSMUSG00000019087	Atp6ap1	2.60843	ENSMUSG00000019810	Fuca2	2.50761	ENSMUSG00000013846	St3gal1	3.50499	ENSMUSG00000020689	Itgb3	4.6713	ENSMUSG00000018042	Cyb5r3	2.96147
ENSMUSG00000019888	Mgat4c	1170.06	ENSMUSG00000019139	Isyna1	2.4534	ENSMUSG00000019832	Rab32	5.18413	ENSMUSG00000014158	Trpv4	6.46667	ENSMUSG00000020695	Mrc2	3.31861	ENSMUSG00000018102	Hist1h2bc	3.34722
ENSMUSG00000019982	Myb	7.36145	ENSMUSG00000019158	Tmem160	3.2029	ENSMUSG00000019850	Tnfaip3	4.41045	ENSMUSG00000014294	Ndufa2	2.16701	ENSMUSG00000020707	Rnf135	3.16216	ENSMUSG00000018293	Pfn1	2.08913
ENSMUSG00000019987	Arg1	219.504	ENSMUSG00000019210	Atp6v1e1	2.12658	ENSMUSG00000019863	Qrsl1	2.78519	ENSMUSG00000014599	Csf1	4.98043	ENSMUSG00000020709	Adap2	6.792	ENSMUSG00000018339	Gpx3	6.85656
ENSMUSG00000019989	Enpp3	3.48542	ENSMUSG00000019320	Noxo1	5.57516	ENSMUSG00000019872	Smpdl3a	3.10199	ENSMUSG00000014776	Nol3	7.71698	ENSMUSG00000020743	Mif4gd	2.10545	ENSMUSG00000018340	Anxa6	2.92615
ENSMUSG00000019990	Pde7b	5.54079	ENSMUSG00000019370	Calm3	2.4444	ENSMUSG00000019888	Mgat4c	1476.85	ENSMUSG00000014791	Elmo3	4.83478	ENSMUSG00000020774	Aspa	2.82828	ENSMUSG00000018585	Atox1	3.60099
ENSMUSG00000020023	Tmcc3	4.92694	ENSMUSG00000019433	Gipc1	2.87687	ENSMUSG00000019982	Myb	6.76305	ENSMUSG00000014837	4931428F04Rik	2.91339	ENSMUSG00000020829	Slc46a1	2.65979	ENSMUSG00000018593	Sparc	10.0358
ENSMUSG00000020062	Slc5a8	332.233	ENSMUSG00000019487	Trip10	2.60348	ENSMUSG00000019987	Arg1	159.081	ENSMUSG00000014980	Tsen15	2.77846	ENSMUSG00000020865	Abcc3	3.7	ENSMUSG00000018648	Dusp14	2.2662
ENSMUSG00000020099	Unc5b	6.11779	ENSMUSG00000019528	Gyg	2.26873	ENSMUSG00000019989	Enpp3	3.44689	ENSMUSG00000015289	Lage3	3.38806	ENSMUSG00000020900	Myh10	2.55526	ENSMUSG00000018669	Cdk5rap3	2.16288
ENSMUSG00000020108	Ddit4	2.84459	ENSMUSG00000019734	Tmc4	3.38682	ENSMUSG00000019990	Pde7b	10.4172	ENSMUSG00000015340	Cybb	26.8889	ENSMUSG00000020911	Krt19	3.14343	ENSMUSG00000018672	Copz2	2.51923
ENSMUSG00000020152	Actr2	2.52005	ENSMUSG00000019810	Fuca2	3.50127	ENSMUSG00000020023	Tmcc3	3.49059	ENSMUSG00000015533	Itga2	2.5985	ENSMUSG00000020928	Higd1b	6.71429	ENSMUSG00000018677	Slc25a39	2.83165
ENSMUSG00000020181	Nav3	4.12766	ENSMUSG00000019832	Rab32	8.29524	ENSMUSG00000020062	Slc5a8	151.7	ENSMUSG00000015568	Lpl	24.149	ENSMUSG00000021003	Galc	2.45755	ENSMUSG00000018740	Slc25a35	3.00662
ENSMUSG00000020205	Phlda1	2.75309	ENSMUSG00000019850	Tnfaip3	6.49426	ENSMUSG00000020087	Tysnd1	3.05172	ENSMUSG00000015575	Atp6v0e	3.63411	ENSMUSG00000021185	9030617O03Rik	2.33613	ENSMUSG00000018920	Cxcl16	13.1845
ENSMUSG00000020232	Hmg20b	2.21845	ENSMUSG00000019863	Qrsl1	2.49259	ENSMUSG00000020108	Ddit4	4.02293	ENSMUSG00000015619	Gata3	10.6364	ENSMUSG00000021186	Fbln5	4.95385	ENSMUSG00000018927	Ccl6	253.731
ENSMUSG00000020234	4930404N11Rik	4.65152	ENSMUSG00000019872	Smpdl3a	2.90837	ENSMUSG00000020152	Actr2	2.42986	ENSMUSG00000015627	Gata5	52.7143	ENSMUSG00000021190	Lgmn	3.92971	ENSMUSG00000018931	Natd1	2.88644
ENSMUSG00000020235	Fzr1	2.01374	ENSMUSG00000019888	Mgat4c	657.884	ENSMUSG00000020225	Tmbim4	2.02556	ENSMUSG00000015647	Lama5	4.29247	ENSMUSG00000021223	Papln	7.16519	ENSMUSG00000018999	Slc35b4	2.56158
ENSMUSG00000020255	D10Wsu102e	2.59845	ENSMUSG00000019979	Apaf1	3.30035	ENSMUSG00000020232	Hmg20b	2.46676	ENSMUSG00000015652	Steap1	80.0909	ENSMUSG00000021280	Exoc3l4	3.25	ENSMUSG00000019054	Fis1	2.04414
ENSMUSG00000020256	Aldh1l2	8.33333	ENSMUSG00000019982	Myb	6.21687	ENSMUSG00000020234	4930404N11Rik	3.21212	ENSMUSG00000015653	Steap2	3.6022	ENSMUSG00000021281	Tnfaip2	3.40255	ENSMUSG00000019055	Plod1	6.54278
ENSMUSG00000020272	Stk10	5.33143	ENSMUSG00000019987	Arg1	180.844	ENSMUSG00000020238	Ncln	2.18182	ENSMUSG00000015668	Pdzd11	3.36913	ENSMUSG00000021319	Sfrp4	2.82115	ENSMUSG00000019066	Rab3d	3.65583
ENSMUSG00000020277	Pfkl	2.71717	ENSMUSG00000019989	Enpp3	3.6219	ENSMUSG00000020256	Aldh1l2	5.95455	ENSMUSG00000015672	Mrpl32	2.27178	ENSMUSG00000021388	Aspn	13.4229	ENSMUSG00000019124	Scrn1	3.4428
ENSMUSG00000020300	Cpeb4	2.64989	ENSMUSG00000019990	Pde7b	4.13986	ENSMUSG00000020272	Stk10	5.39184	ENSMUSG00000015759	Cnih1	3.94461	ENSMUSG00000021390	Ogn	19.7494	ENSMUSG00000019189	Rnf145	2.04257
ENSMUSG00000020303	Stc2	5.59028	ENSMUSG00000020023	Tmcc3	4.31845	ENSMUSG00000020277	Pfkl	2.21763	ENSMUSG00000015880	Ncapg	3.54054	ENSMUSG00000021497	Txndc15	2.41772	ENSMUSG00000019194	Scn1b	3.93841
ENSMUSG00000020309	Chac2	5.38983	ENSMUSG00000020062	Slc5a8	183.533	ENSMUSG00000020300	Cpeb4	2.91091	ENSMUSG00000016024	Lbp	3.99644	ENSMUSG00000021607	Mrpl36	2.74436	ENSMUSG00000019278	Dpep1	36.2
ENSMUSG00000020386	Sar1b	2.1034	ENSMUSG00000020099	Unc5b	3.62907	ENSMUSG00000020303	Stc2	8.63889	ENSMUSG00000016028	Celsr1	7.63729	ENSMUSG00000021643	Serf1	2.64835	ENSMUSG00000019326	Aoc3	4.75862
ENSMUSG00000020432	Tcn2	2.59355	ENSMUSG00000020152	Actr2	2.58878	ENSMUSG00000020308	Tpgs1	2.53378	ENSMUSG00000016252	Atp5e	4.81938	ENSMUSG00000021702	Thbs4	9.24348	ENSMUSG00000019359	Gdpd2	81.3187
ENSMUSG00000020437	Myo1g	4.53691	ENSMUSG00000020159	Gabrp	2.49397	ENSMUSG00000020309	Chac2	8.32203	ENSMUSG00000016344	Ppdpf	2.37931	ENSMUSG00000021760	Gpx8	3.38213	ENSMUSG00000019461	Plscr3	2.39619
ENSMUSG00000020474	Polm	3.55346	ENSMUSG00000020234	4930404N11Rik	3.56061	ENSMUSG00000020328	Nudcd2	2.53886	ENSMUSG00000016427	Ndufa1	3.58673	ENSMUSG00000021822	Plau	3.7714	ENSMUSG00000019528	Gyg	2.7719
ENSMUSG00000020476	Dbnl	2.32981	ENSMUSG00000020238	Ncln	2.24151	ENSMUSG00000020346	Mgat1	2.37688	ENSMUSG00000016477	E2f3	4.00562	ENSMUSG00000021879	Dnah12	7.57724	ENSMUSG00000019539	Rcn3	2.11974
ENSMUSG00000020573	Pik3cg	5.53315	ENSMUSG00000020256	Aldh1l2	6.25758	ENSMUSG00000020386	Sar1b	2.33639	ENSMUSG00000016487	Ppfibp1	3.43927	ENSMUSG00000021892	Sh3bp5	2.77214	ENSMUSG00000019779	Frk	4.26394
ENSMUSG00000020581	Agr2	11.6615	ENSMUSG00000020261	Slc36a1	2.52258	ENSMUSG00000020432	Tcn2	3.39871	ENSMUSG00000016494	Cd34	4.14298	ENSMUSG00000021991	Cacna2d3	4.12371	ENSMUSG00000019785	Clvs2	4.01932
ENSMUSG00000020601	Trib2	4.38506	ENSMUSG00000020272	Stk10	2.98939	ENSMUSG00000020474	Polm	4.90881	ENSMUSG00000016503	Gtf3a	2.74503	ENSMUSG00000021994	Wnt5a	5.31813	ENSMUSG00000019787	Trdn	187.208
ENSMUSG00000020607	Fam84a	2.35957	ENSMUSG00000020277	Pfkl	2.98806	ENSMUSG00000020476	Dbnl	2.5	ENSMUSG00000016529	Il10	4.75817	ENSMUSG00000022044	Stmn4	10.8642	ENSMUSG00000019796	Lrp11	3.22727
ENSMUSG00000020614	Fam20a	3.61417	ENSMUSG00000020303	Stc2	3.65509	ENSMUSG00000020570	Sypl	2.2845	ENSMUSG00000016624	Phf21b	14.8346	ENSMUSG00000022098	Bmp1	3.19663	ENSMUSG00000019810	Fuca2	2.99342
ENSMUSG00000020646	Mboat2	4.97341	ENSMUSG00000020308	Tpgs1	2.32432	ENSMUSG00000020573	Pik3cg	5.09945	ENSMUSG00000016756	Cmah	29.4444	ENSMUSG00000022210	Dhrs4	2.21229	ENSMUSG00000019850	Tnfaip3	3.52822
ENSMUSG00000020651	Slc26a4	104.866	ENSMUSG00000020309	Chac2	6.15254	ENSMUSG00000020581	Agr2	17.3385	ENSMUSG00000016757	Ttll12	2.80668	ENSMUSG00000022221	Ripk3	2.99512	ENSMUSG00000019851	Perp	5.9375
ENSMUSG00000020733	Slc9a3r1	2.90515	ENSMUSG00000020330	Hmmr	2.28326	ENSMUSG00000020601	Trib2	6.06322	ENSMUSG00000017002	Slpi	51.625	ENSMUSG00000022272	Myo10	3.63486	ENSMUSG00000019944	Rhobtb1	2.79984
ENSMUSG00000020758	Itgb4	2.11625	ENSMUSG00000020346	Mgat1	2.29313	ENSMUSG00000020605	Hs1bp3	2.17931	ENSMUSG00000017009	Sdc4	2.71493	ENSMUSG00000022306	Zfpm2	2.43087	ENSMUSG00000019987	Arg1	21.4198
ENSMUSG00000020782	Llgl2	2.19217	ENSMUSG00000020386	Sar1b	2.38482	ENSMUSG00000020646	Mboat2	6.56869	ENSMUSG00000017057	Il13ra1	4.4745	ENSMUSG00000022371	Col14a1	2.63106	ENSMUSG00000020014	Cfap54	14.5439
ENSMUSG00000020846	Rflnb	6.03561	ENSMUSG00000020432	Tcn2	3.79355	ENSMUSG00000020651	Slc26a4	54.7683	ENSMUSG00000017314	Mpp2	2.21854	ENSMUSG00000022408	Fam83f	3.54839	ENSMUSG00000020027	Socs2	5.25165
ENSMUSG00000020847	Rph3al	3.21118	ENSMUSG00000020437	Myo1g	5.24832	ENSMUSG00000020669	Sh3yl1	2.33152	ENSMUSG00000017446	C1qtnf1	2.90909	ENSMUSG00000022440	C1qtnf6	8.63492	ENSMUSG00000020053	Igf1	3.39857
ENSMUSG00000020901	Pik3r5	4.63488	ENSMUSG00000020474	Polm	3.44969	ENSMUSG00000020733	Slc9a3r1	2.46793	ENSMUSG00000017664	Slc35c2	2.76987	ENSMUSG00000022489	Pde1b	3.86275	ENSMUSG00000020100	Slc29a3	2.38214
ENSMUSG00000020902	Ntn1	4.17846	ENSMUSG00000020476	Dbnl	2.49231	ENSMUSG00000020758	Itgb4	2.28416	ENSMUSG00000017774	Myo1c	2.50256	ENSMUSG00000022523	Fgf12	6.44444	ENSMUSG00000020101	Vsir	3.6242
ENSMUSG00000020911	Krt19	5.43406	ENSMUSG00000020520	Galnt10	2.65049	ENSMUSG00000020798	Spns3	8.26415	ENSMUSG00000017830	Dhx58	7.28571	ENSMUSG00000022587	Ly6e	7.39718	ENSMUSG00000020121	Srgap1	5.22844
ENSMUSG00000020912	Krt12	20.4561	ENSMUSG00000020573	Pik3cg	6.41713	ENSMUSG00000020846	Rflnb	4.97033	ENSMUSG00000017929	B4galt5	2.64986	ENSMUSG00000022676	Snai2	2.17467	ENSMUSG00000020163	Uqcr11	3.35326
ENSMUSG00000021187	Tc2n	3.02891	ENSMUSG00000020581	Agr2	20.4	ENSMUSG00000020847	Rph3al	3.68944	ENSMUSG00000017969	Ptgis	32.1845	ENSMUSG00000022754	Tmem45a	2.55703	ENSMUSG00000020173	Cobl	6.86111
ENSMUSG00000021203	Otub2	4.05727	ENSMUSG00000020601	Trib2	5.61494	ENSMUSG00000020902	Ntn1	8.34003	ENSMUSG00000018042	Cyb5r3	4.671	ENSMUSG00000022814	Umps	2.55483	ENSMUSG00000020178	Adora2a	3.62264
ENSMUSG00000021207	Akr1c21	41.5121	ENSMUSG00000020607	Fam84a	2.11776	ENSMUSG00000020911	Krt19	3.06251	ENSMUSG00000018102	Hist1h2bc	5.73611	ENSMUSG00000022816	Fstl1	2.59734	ENSMUSG00000020181	Nav3	4.93691
ENSMUSG00000021213	Akr1c13	2.32237	ENSMUSG00000020614	Fam20a	3.77953	ENSMUSG00000020912	Krt12	6.07018	ENSMUSG00000018293	Pfn1	2.49447	ENSMUSG00000022817	Itgb5	3.30706	ENSMUSG00000020205	Phlda1	2.27304
ENSMUSG00000021214	Akr1c18	21.3256	ENSMUSG00000020638	Cmpk2	6.52532	ENSMUSG00000021054	Sgpp1	2.41137	ENSMUSG00000018339	Gpx3	4.94704	ENSMUSG00000022842	Ece2	2.31178	ENSMUSG00000020219	Timm13	3.4965
ENSMUSG00000021215	Net1	2.08671	ENSMUSG00000020641	Rsad2	7.78351	ENSMUSG00000021114	Atp6v1d	2.1499	ENSMUSG00000018340	Anxa6	2.75307	ENSMUSG00000022844	Pdia5	6.56034	ENSMUSG00000020232	Hmg20b	3.60996
ENSMUSG00000021223	Papln	18.044	ENSMUSG00000020646	Mboat2	3.6514	ENSMUSG00000021187	Tc2n	3.28836	ENSMUSG00000018427	Ypel2	2.8523	ENSMUSG00000022899	Slc15a2	7.57143	ENSMUSG00000020241	Col6a2	14.3005
ENSMUSG00000021224	Numb	2.18864	ENSMUSG00000020651	Slc26a4	182.854	ENSMUSG00000021203	Otub2	6.64317	ENSMUSG00000018585	Atox1	4.17241	ENSMUSG00000022965	Ifngr2	2.28975	ENSMUSG00000020260	Pofut2	2.79472
ENSMUSG00000021303	Gng4	29.4595	ENSMUSG00000020669	Sh3yl1	2.01902	ENSMUSG00000021207	Akr1c21	31.8117	ENSMUSG00000018593	Sparc	13.047	ENSMUSG00000023039	Krt7	4.18919	ENSMUSG00000020308	Tpgs1	3.30065
ENSMUSG00000021326	Trim27	2.21739	ENSMUSG00000020733	Slc9a3r1	2.76603	ENSMUSG00000021214	Akr1c18	11.5349	ENSMUSG00000018669	Cdk5rap3	2.48674	ENSMUSG00000023048	Prr13	2.35034	ENSMUSG00000020328	Nudcd2	4.28571
ENSMUSG00000021361	Tmem14c	3.07353	ENSMUSG00000020798	Spns3	5.32075	ENSMUSG00000021223	Papln	23.8864	ENSMUSG00000018672	Copz2	2.35897	ENSMUSG00000023094	Msrb2	3.15577	ENSMUSG00000020402	Vdac1	2.50976
ENSMUSG00000021451	Sema4d	2.12194	ENSMUSG00000020846	Rflnb	5.14243	ENSMUSG00000021303	Gng4	53.3784	ENSMUSG00000018677	Slc25a39	3.00504	ENSMUSG00000023224	Serping1	2.26823	ENSMUSG00000020431	Adcy1	5.85714
ENSMUSG00000021457	Syk	4.37681	ENSMUSG00000020869	Lrrc59	2.29152	ENSMUSG00000021361	Tmem14c	3.41807	ENSMUSG00000018740	Slc25a35	2.97351	ENSMUSG00000023249	Parp3	2.58768	ENSMUSG00000020432	Tcn2	3.79746
ENSMUSG00000021477	Ctsl	7.89078	ENSMUSG00000020901	Pik3r5	5.37139	ENSMUSG00000021457	Syk	3.95169	ENSMUSG00000018846	Pank3	2.96407	ENSMUSG00000023341	Mx2	3.06957	ENSMUSG00000020456	Ogdh	2.07487
ENSMUSG00000021486	Prelid1	2.25926	ENSMUSG00000020902	Ntn1	4.31492	ENSMUSG00000021497	Txndc15	2.71274	ENSMUSG00000018848	Rars	2.98665	ENSMUSG00000023367	Tmem176a	3.025	ENSMUSG00000020473	Aebp1	4.43545
ENSMUSG00000021493	Pdlim7	2.62479	ENSMUSG00000020911	Krt19	4.94102	ENSMUSG00000021550	2210016F16Rik	2.312	ENSMUSG00000018849	Wwc1	4.29518	ENSMUSG00000023791	Pigx	2.82743	ENSMUSG00000020474	Polm	2.25271
ENSMUSG00000021553	Slc28a3	6.86535	ENSMUSG00000020912	Krt12	17.0351	ENSMUSG00000021553	Slc28a3	7.91268	ENSMUSG00000018920	Cxcl16	10.8946	ENSMUSG00000023885	Thbs2	2.81911	ENSMUSG00000020476	Dbnl	2.55381
ENSMUSG00000021556	Golm1	11.2465	ENSMUSG00000021094	Dhrs7	2.29003	ENSMUSG00000021556	Golm1	9.66597	ENSMUSG00000018923	Med11	2.78182	ENSMUSG00000023913	Pla2g7	2.02073	ENSMUSG00000020515	Cnot8	2.69427
ENSMUSG00000021591	Glrx	2.62873	ENSMUSG00000021187	Tc2n	2.53002	ENSMUSG00000021607	Mrpl36	3.63855	ENSMUSG00000018927	Ccl6	213.433	ENSMUSG00000023915	Tnfrsf21	4.64804	ENSMUSG00000020524	Gria1	2.79775
ENSMUSG00000021594	Srd5a1	2.52675	ENSMUSG00000021203	Otub2	2.67401	ENSMUSG00000021610	Clptm1l	2.68535	ENSMUSG00000018931	Natd1	3.17035	ENSMUSG00000024066	Xdh	2.75417	ENSMUSG00000020604	Arsg	4.87692
ENSMUSG00000021607	Mrpl36	3.09639	ENSMUSG00000021214	Akr1c18	9.06977	ENSMUSG00000021621	Zcchc9	2.04722	ENSMUSG00000018999	Slc35b4	2.40999	ENSMUSG00000024079	Eif2ak2	3.15697	ENSMUSG00000020607	Fam84a	9.19763
ENSMUSG00000021610	Clptm1l	2.54057	ENSMUSG00000021223	Papln	19.2784	ENSMUSG00000021640	Naip1	72.3014	ENSMUSG00000019054	Fis1	2.30139	ENSMUSG00000024084	Qpct	4.35868	ENSMUSG00000020621	Rdh14	2.4878
ENSMUSG00000021620	Acot12	6.28889	ENSMUSG00000021303	Gng4	16.4054	ENSMUSG00000021665	Hexb	2.94337	ENSMUSG00000019055	Plod1	4.8068	ENSMUSG00000024140	Epas1	2.74502	ENSMUSG00000020642	Rnf144a	2.60427
ENSMUSG00000021640	Naip1	49.226	ENSMUSG00000021326	Trim27	2.39013	ENSMUSG00000021668	Polk	2.71314	ENSMUSG00000019066	Rab3d	4	ENSMUSG00000024164	C3	3.6042	ENSMUSG00000020674	Pxdn	3.44927
ENSMUSG00000021668	Polk	3.54167	ENSMUSG00000021361	Tmem14c	2.70588	ENSMUSG00000021703	Serinc5	3.91598	ENSMUSG00000019124	Scrn1	3.70551	ENSMUSG00000024187	Fam234a	3.26146	ENSMUSG00000020676	Ccl11	20.2661
ENSMUSG00000021676	Iqgap2	3.02381	ENSMUSG00000021451	Sema4d	2.05632	ENSMUSG00000021720	Rnf180	9.7662	ENSMUSG00000019158	Tmem160	6.06818	ENSMUSG00000024256	Adcyap1	42.515	ENSMUSG00000020689	Itgb3	6.65565
ENSMUSG00000021720	Rnf180	9.05352	ENSMUSG00000021457	Syk	4.21256	ENSMUSG00000021725	Parp8	6.58315	ENSMUSG00000019194	Scn1b	3.09783	ENSMUSG00000024371	C2	3.05538	ENSMUSG00000020695	Mrc2	3.18586
ENSMUSG00000021725	Parp8	5.20334	ENSMUSG00000021477	Ctsl	6.67102	ENSMUSG00000021728	Emb	3.23929	ENSMUSG00000019278	Dpep1	20.25	ENSMUSG00000024379	Tslp	29.1667	ENSMUSG00000020736	Nt5c	5.57143
ENSMUSG00000021749	Oit1	5.38531	ENSMUSG00000021486	Prelid1	2.57963	ENSMUSG00000021749	Oit1	4.87684	ENSMUSG00000019326	Aoc3	3.46207	ENSMUSG00000024437	Gm8615	2.71154	ENSMUSG00000020743	Mif4gd	3.79636
ENSMUSG00000021792	Fam213a	58.6422	ENSMUSG00000021493	Pdlim7	2.6448	ENSMUSG00000021751	Acox2	19.3571	ENSMUSG00000019359	Gdpd2	63.3367	ENSMUSG00000024440	Pcdh12	4.37984	ENSMUSG00000020806	Rhbdf2	2.46596
ENSMUSG00000021795	Sftpd	18.4259	ENSMUSG00000021508	Cxcl14	2.19737	ENSMUSG00000021782	Dlg5	2.86529	ENSMUSG00000019461	Plscr3	2.16851	ENSMUSG00000024480	Ap3s1	2.23917	ENSMUSG00000020829	Slc46a1	2.53608
ENSMUSG00000021822	Plau	9.31122	ENSMUSG00000021553	Slc28a3	6.87268	ENSMUSG00000021786	Oxsm	2.07353	ENSMUSG00000019494	Cops6	2.65113	ENSMUSG00000024481	Lvrn	5.56557	ENSMUSG00000020838	Slc6a4	16.3333
ENSMUSG00000021831	Ero1l	5.36756	ENSMUSG00000021556	Golm1	11.9433	ENSMUSG00000021792	Fam213a	61.5829	ENSMUSG00000019528	Gyg	2.23565	ENSMUSG00000024529	Lox	5.6694	ENSMUSG00000020844	Nxn	2.73029
ENSMUSG00000021868	Ppif	3.42105	ENSMUSG00000021591	Glrx	2.6477	ENSMUSG00000021795	Sftpd	16.7513	ENSMUSG00000019738	Polr2i	2.17341	ENSMUSG00000024534	Sncaip	2.93955	ENSMUSG00000020865	Abcc3	22.1571
ENSMUSG00000021871	Pnp	2.98776	ENSMUSG00000021607	Mrpl36	3.53012	ENSMUSG00000021822	Plau	3.03053	ENSMUSG00000019779	Frk	4.72119	ENSMUSG00000024538	Ppic	4.70682	ENSMUSG00000020900	Myh10	2.57666
ENSMUSG00000021991	Cacna2d3	54.6364	ENSMUSG00000021610	Clptm1l	2.85522	ENSMUSG00000021831	Ero1l	5.36161	ENSMUSG00000019785	Clvs2	2.38164	ENSMUSG00000024598	Fbn2	17.9084	ENSMUSG00000020911	Krt19	35.1554
ENSMUSG00000022014	Epsti1	3.78342	ENSMUSG00000021640	Naip1	55.9589	ENSMUSG00000021871	Pnp	2.48776	ENSMUSG00000019787	Trdn	247.958	ENSMUSG00000024617	Camk2a	3.37662	ENSMUSG00000020935	Dcakd	2.43156
ENSMUSG00000022111	Uchl3	2.39909	ENSMUSG00000021668	Polk	4.03526	ENSMUSG00000021981	Cab39l	2.41187	ENSMUSG00000019796	Lrp11	3.92424	ENSMUSG00000024620	Pdgfrb	2.38215	ENSMUSG00000020961	Ston2	2.99777
ENSMUSG00000022175	Lrp10	2.39117	ENSMUSG00000021676	Iqgap2	2.37998	ENSMUSG00000021991	Cacna2d3	50.5455	ENSMUSG00000019810	Fuca2	2.80263	ENSMUSG00000024646	Cyb5a	2.31573	ENSMUSG00000021044	Adck1	2.06748
ENSMUSG00000022193	Psmb5	3.38261	ENSMUSG00000021720	Rnf180	8.75775	ENSMUSG00000021994	Wnt5a	4.36692	ENSMUSG00000019851	Perp	10.9931	ENSMUSG00000024678	Ms4a4d	5.15147	ENSMUSG00000021047	Nova1	5.43534
ENSMUSG00000022219	Cideb	4.78571	ENSMUSG00000021725	Parp8	5.03849	ENSMUSG00000022014	Epsti1	2.92781	ENSMUSG00000019864	Rtn4ip1	2.79518	ENSMUSG00000024736	Tmem132a	4.56821	ENSMUSG00000021062	Rab15	4.19231
ENSMUSG00000022235	Cmbl	9.5641	ENSMUSG00000021749	Oit1	4.45989	ENSMUSG00000022096	Hr	3.82493	ENSMUSG00000019866	Aim1	4.03614	ENSMUSG00000024737	Slc15a3	2.72061	ENSMUSG00000021185	9030617O03Rik	3.11765
ENSMUSG00000022265	Ank	6.76169	ENSMUSG00000021792	Fam213a	46.9095	ENSMUSG00000022098	Bmp1	3.05473	ENSMUSG00000019942	Cdk1	8.02857	ENSMUSG00000024772	Ehd1	2.74692	ENSMUSG00000021186	Fbln5	3.5956
ENSMUSG00000022382	Wnt7b	5.11357	ENSMUSG00000021795	Sftpd	15.1349	ENSMUSG00000022175	Lrp10	2.75169	ENSMUSG00000019944	Rhobtb1	3.24282	ENSMUSG00000024777	Ppp2r5b	2.30833	ENSMUSG00000021190	Lgmn	2.28685
ENSMUSG00000022408	Fam83f	2.81818	ENSMUSG00000021822	Plau	7.61832	ENSMUSG00000022186	Oxct1	3.06913	ENSMUSG00000019960	Dusp6	6.32656	ENSMUSG00000024781	Lipa	3.18942	ENSMUSG00000021223	Papln	7.15634
ENSMUSG00000022433	Csnk1e	2.16855	ENSMUSG00000021831	Ero1l	4.6369	ENSMUSG00000022193	Psmb5	3.19565	ENSMUSG00000019987	Arg1	33.9012	ENSMUSG00000024958	Gpr137	3.16049	ENSMUSG00000021236	Entpd5	2.09916
ENSMUSG00000022453	Naga	2.37	ENSMUSG00000021868	Ppif	2.47661	ENSMUSG00000022219	Cideb	3.875	ENSMUSG00000020014	Cfap54	13.4035	ENSMUSG00000024978	Gpam	6.03978	ENSMUSG00000021256	Vash1	18.4706
ENSMUSG00000022551	Cyc1	2.0304	ENSMUSG00000021991	Cacna2d3	44.197	ENSMUSG00000022235	Cmbl	18.1026	ENSMUSG00000020022	Ndufa12	2.52151	ENSMUSG00000025027	Xpnpep1	2.24258	ENSMUSG00000021280	Exoc3l4	4.10526
ENSMUSG00000022570	Tsta3	2.40057	ENSMUSG00000022014	Epsti1	4.84759	ENSMUSG00000022265	Ank	8.26281	ENSMUSG00000020027	Socs2	6.30116	ENSMUSG00000025089	Gfra1	6.55217	ENSMUSG00000021281	Tnfaip2	3.38006
ENSMUSG00000022575	Gsdmd	2.46829	ENSMUSG00000022175	Lrp10	2.40784	ENSMUSG00000022382	Wnt7b	3.79794	ENSMUSG00000020053	Igf1	4.55217	ENSMUSG00000025105	Bnc1	4.85915	ENSMUSG00000021313	Ryr2	5.93276
ENSMUSG00000022587	Ly6e	2.7118	ENSMUSG00000022193	Psmb5	3.92609	ENSMUSG00000022453	Naga	2.98571	ENSMUSG00000020101	Vsir	3.0695	ENSMUSG00000025171	Ubtd1	2.26966	ENSMUSG00000021319	Sfrp4	6.08834
ENSMUSG00000022598	Psca	9.24382	ENSMUSG00000022216	Psme1	2.06871	ENSMUSG00000022526	Zfp251	2.85185	ENSMUSG00000020121	Srgap1	4.32526	ENSMUSG00000025188	Hps1	2.64865	ENSMUSG00000021361	Tmem14c	3.25
ENSMUSG00000022620	Arsa	4.31048	ENSMUSG00000022219	Cideb	5.23214	ENSMUSG00000022561	Gpaa1	2.44902	ENSMUSG00000020163	Uqcr11	4.72283	ENSMUSG00000025190	Got1	2.17988	ENSMUSG00000021368	Tbc1d7	3.19588
ENSMUSG00000022636	Alcam	5.24485	ENSMUSG00000022221	Ripk3	2.7151	ENSMUSG00000022570	Tsta3	2.84375	ENSMUSG00000020173	Cobl	12.6574	ENSMUSG00000025203	Scd2	2.5137	ENSMUSG00000021388	Aspn	10.9167
ENSMUSG00000022755	Adgrg7	30.6115	ENSMUSG00000022235	Cmbl	6.79487	ENSMUSG00000022620	Arsa	8.14919	ENSMUSG00000020181	Nav3	3.70032	ENSMUSG00000025232	Hexa	3.18153	ENSMUSG00000021390	Ogn	26.987
ENSMUSG00000022769	Sdf2l1	2.35191	ENSMUSG00000022265	Ank	6.29027	ENSMUSG00000022636	Alcam	5.00749	ENSMUSG00000020186	Csrp2	3.54655	ENSMUSG00000025329	Padi1	8.63077	ENSMUSG00000021396	Nxnl2	14.7059
ENSMUSG00000022791	Tnk2	2.37718	ENSMUSG00000022382	Wnt7b	4.61799	ENSMUSG00000022755	Adgrg7	12.6799	ENSMUSG00000020219	Timm13	3.86713	ENSMUSG00000025371	Chmp6	2.1118	ENSMUSG00000021457	Syk	37.8235
ENSMUSG00000022824	Muc13	23.549	ENSMUSG00000022433	Csnk1e	2.04827	ENSMUSG00000022769	Sdf2l1	3.30792	ENSMUSG00000020232	Hmg20b	3.67012	ENSMUSG00000025381	Cnpy2	2.64404	ENSMUSG00000021474	Sfxn1	2.78326
ENSMUSG00000022843	Clcn2	3.10214	ENSMUSG00000022453	Naga	2.69571	ENSMUSG00000022797	Tfrc	2.23827	ENSMUSG00000020241	Col6a2	10.2876	ENSMUSG00000025647	Shisa5	2.26299	ENSMUSG00000021486	Prelid1	2.22018
ENSMUSG00000022844	Pdia5	2.43137	ENSMUSG00000022551	Cyc1	2.09119	ENSMUSG00000022824	Muc13	25.5686	ENSMUSG00000020260	Pofut2	2.36296	ENSMUSG00000025650	Col7a1	5.68265	ENSMUSG00000021497	Txndc15	2.79747
ENSMUSG00000022853	Ehhadh	3.19444	ENSMUSG00000022561	Gpaa1	2.50108	ENSMUSG00000022843	Clcn2	3.10765	ENSMUSG00000020267	Hint1	2.10499	ENSMUSG00000025780	Itih5	3.24471	ENSMUSG00000021536	Adcy2	6.66312
ENSMUSG00000022938	Fam3b	40800	ENSMUSG00000022570	Tsta3	3.18466	ENSMUSG00000022853	Ehhadh	2.77778	ENSMUSG00000020303	Stc2	7.87153	ENSMUSG00000025784	Clec3b	5.51182	ENSMUSG00000021556	Golm1	3.00966
ENSMUSG00000022947	Cbr3	4.22523	ENSMUSG00000022575	Gsdmd	3.21951	ENSMUSG00000022861	Dgkg	5.72183	ENSMUSG00000020308	Tpgs1	3.28758	ENSMUSG00000025875	Tspan17	3.36145	ENSMUSG00000021583	Erap1	2.10317
ENSMUSG00000022964	Tmem50b	2.38736	ENSMUSG00000022587	Ly6e	3.47608	ENSMUSG00000022938	Fam3b	29800	ENSMUSG00000020321	Mdh1	2.17411	ENSMUSG00000025885	Myo5b	4.55285	ENSMUSG00000021606	Ndufs6	2.66321
ENSMUSG00000022965	Ifngr2	3.94598	ENSMUSG00000022620	Arsa	3.31048	ENSMUSG00000022947	Cbr3	5.66667	ENSMUSG00000020326	Ccng1	2.14798	ENSMUSG00000025938	Slco5a1	4.10331	ENSMUSG00000021607	Mrpl36	3.64662
ENSMUSG00000023019	Gpd1	4.76271	ENSMUSG00000022636	Alcam	4.57824	ENSMUSG00000022964	Tmem50b	3.05799	ENSMUSG00000020328	Nudcd2	6.76531	ENSMUSG00000025950	Idh1	5.81462	ENSMUSG00000021610	Clptm1l	2.38928
ENSMUSG00000023039	Krt7	4.95742	ENSMUSG00000022755	Adgrg7	23.5558	ENSMUSG00000022965	Ifngr2	3.42714	ENSMUSG00000020330	Hmmr	18.7273	ENSMUSG00000025955	Akr1cl	93.7656	ENSMUSG00000021614	Vcan	2.5243
ENSMUSG00000023041	Krt6b	17.3853	ENSMUSG00000022769	Sdf2l1	2.30499	ENSMUSG00000023019	Gpd1	5.83051	ENSMUSG00000020340	Cyfip2	2.4695	ENSMUSG00000025993	Slc40a1	3.18851	ENSMUSG00000021643	Serf1	2.6044
ENSMUSG00000023048	Prr13	3.00697	ENSMUSG00000022797	Tfrc	2.31631	ENSMUSG00000023020	Cox14	2.199	ENSMUSG00000020361	Hspa4	2.50203	ENSMUSG00000026042	Col5a2	4.47178	ENSMUSG00000021702	Thbs4	9.18261
ENSMUSG00000023175	Bsg	2.72522	ENSMUSG00000022824	Muc13	23.4118	ENSMUSG00000023039	Krt7	4.23357	ENSMUSG00000020388	Pdlim4	2.16156	ENSMUSG00000026043	Col3a1	13.6595	ENSMUSG00000021728	Emb	18.6489
ENSMUSG00000023232	Serinc2	7.4183	ENSMUSG00000022843	Clcn2	2.89358	ENSMUSG00000023041	Krt6b	6.59633	ENSMUSG00000020400	Tnip1	2.47585	ENSMUSG00000026047	Kdelc1	2.29412	ENSMUSG00000021758	Ddx4	129.25
ENSMUSG00000023328	Ache	2.67778	ENSMUSG00000022844	Pdia5	3.41176	ENSMUSG00000023074	Mospd1	2.63514	ENSMUSG00000020402	Vdac1	3.24483	ENSMUSG00000026185	Igfbp5	2.69522	ENSMUSG00000021760	Gpx8	3.8902
ENSMUSG00000023336	Wfdc1	4.12791	ENSMUSG00000022906	Parp9	2.81692	ENSMUSG00000023175	Bsg	2.33351	ENSMUSG00000020431	Adcy1	4.37318	ENSMUSG00000026222	Sp100	3.18677	ENSMUSG00000021773	Comtd1	2.12879
ENSMUSG00000023367	Tmem176a	3.13072	ENSMUSG00000022938	Fam3b	30650	ENSMUSG00000023232	Serinc2	5.95985	ENSMUSG00000020432	Tcn2	3.22114	ENSMUSG00000026303	Mlph	17.7333	ENSMUSG00000021822	Plau	6.7022
ENSMUSG00000023456	Tpi1	2.97759	ENSMUSG00000022947	Cbr3	4.45045	ENSMUSG00000023336	Wfdc1	3.01163	ENSMUSG00000020456	Ogdh	2.16559	ENSMUSG00000026315	Serpinb8	3.10204	ENSMUSG00000021939	Ctsb	2.79533
ENSMUSG00000023571	Fam132a	2.38192	ENSMUSG00000022964	Tmem50b	2.64907	ENSMUSG00000023367	Tmem176a	4.989	ENSMUSG00000020469	Myl7	74.6507	ENSMUSG00000026417	Pigr	9.08235	ENSMUSG00000021944	Gata4	84.0399
ENSMUSG00000023791	Pigx	2.25767	ENSMUSG00000022965	Ifngr2	4.70226	ENSMUSG00000023456	Tpi1	2.66183	ENSMUSG00000020473	Aebp1	4.01283	ENSMUSG00000026532	Spta1	31.1875	ENSMUSG00000021950	Anxa8	217.818
ENSMUSG00000023882	Zfp54	2.40323	ENSMUSG00000023010	Tmbim6	2.03907	ENSMUSG00000023791	Pigx	2.33129	ENSMUSG00000020474	Polm	3.00722	ENSMUSG00000026556	Vangl2	2.02137	ENSMUSG00000021991	Cacna2d3	7.9433
ENSMUSG00000023952	Gtpbp2	2.48782	ENSMUSG00000023019	Gpd1	4.79944	ENSMUSG00000023995	Tspo2	12350	ENSMUSG00000020476	Dbnl	2.71522	ENSMUSG00000026574	Dpt	2.30006	ENSMUSG00000021994	Wnt5a	3.50536
ENSMUSG00000023959	Clic5	4.56969	ENSMUSG00000023039	Krt7	4.02456	ENSMUSG00000024036	Slc37a1	6.40632	ENSMUSG00000020524	Gria1	2.73034	ENSMUSG00000026589	Sec16b	6.82555	ENSMUSG00000021996	Esd	2.18081
ENSMUSG00000024036	Slc37a1	6.25534	ENSMUSG00000023041	Krt6b	3.65138	ENSMUSG00000024038	Ndufv3	2.87692	ENSMUSG00000020604	Arsg	4.10769	ENSMUSG00000026656	Fcgr2b	13.8636	ENSMUSG00000021998	Lcp1	9.21277
ENSMUSG00000024038	Ndufv3	2.45714	ENSMUSG00000023048	Prr13	2.61882	ENSMUSG00000024039	Cbs	3.74437	ENSMUSG00000020607	Fam84a	15.4427	ENSMUSG00000026678	Rgs5	4.10684	ENSMUSG00000022013	Dnajc15	3.34177
ENSMUSG00000024052	Lpin2	3.83461	ENSMUSG00000023175	Bsg	2.72784	ENSMUSG00000024079	Eif2ak2	2.4047	ENSMUSG00000020621	Rdh14	2.5935	ENSMUSG00000026688	Mgst3	2.09615	ENSMUSG00000022040	Ephx2	3.02679
ENSMUSG00000024079	Eif2ak2	2.58232	ENSMUSG00000023232	Serinc2	7.26984	ENSMUSG00000024096	Ralbp1	2.67662	ENSMUSG00000020641	Rsad2	9.32075	ENSMUSG00000026698	Pigc	2.27232	ENSMUSG00000022044	Stmn4	9.04938
ENSMUSG00000024130	Abca3	2.34397	ENSMUSG00000023336	Wfdc1	3.06977	ENSMUSG00000024130	Abca3	2.65941	ENSMUSG00000020658	Efr3b	3.99701	ENSMUSG00000026728	Vim	2.19129	ENSMUSG00000022098	Bmp1	3.85479
ENSMUSG00000024158	Hagh	2.12097	ENSMUSG00000023341	Mx2	2.26752	ENSMUSG00000024164	C3	69.7852	ENSMUSG00000020674	Pxdn	3.33082	ENSMUSG00000026748	Plxdc2	2.23293	ENSMUSG00000022125	Cln5	2.55951
ENSMUSG00000024164	C3	78.3048	ENSMUSG00000023367	Tmem176a	4.0647	ENSMUSG00000024331	Dsc2	3.18277	ENSMUSG00000020676	Ccl11	11.2782	ENSMUSG00000026768	Itga8	3.53971	ENSMUSG00000022144	Gdnf	4.9598
ENSMUSG00000024208	Uqcc2	2.30857	ENSMUSG00000023456	Tpi1	2.93195	ENSMUSG00000024365	Cyp21a1	103.83	ENSMUSG00000020689	Itgb3	5.36638	ENSMUSG00000026779	Mastl	5.5503	ENSMUSG00000022175	Lrp10	3.09993
ENSMUSG00000024245	Tmem178	22.75	ENSMUSG00000023791	Pigx	2.17485	ENSMUSG00000024371	C2	5.03599	ENSMUSG00000020695	Mrc2	2.49231	ENSMUSG00000026814	Eng	2.31581	ENSMUSG00000022193	Psmb5	3.18966
ENSMUSG00000024268	Celf4	3.80435	ENSMUSG00000023952	Gtpbp2	2.37394	ENSMUSG00000024401	Tnf	29.459	ENSMUSG00000020704	Asic2	3.48107	ENSMUSG00000026817	Ak1	8.08434	ENSMUSG00000022210	Dhrs4	3.2067
ENSMUSG00000024270	Slc39a6	4.82395	ENSMUSG00000024006	Stk38	2.42062	ENSMUSG00000024424	Ttc39c	2.45913	ENSMUSG00000020709	Adap2	2.808	ENSMUSG00000026822	Lcn2	11.8211	ENSMUSG00000022221	Ripk3	3.72683
ENSMUSG00000024331	Dsc2	3.97672	ENSMUSG00000024036	Slc37a1	7.11462	ENSMUSG00000024427	Spry4	2.79684	ENSMUSG00000020733	Slc9a3r1	12.6542	ENSMUSG00000026829	Gbgt1	2.72358	ENSMUSG00000022257	Laptm4b	2.39123
ENSMUSG00000024338	Psmb8	2.51316	ENSMUSG00000024038	Ndufv3	2.09231	ENSMUSG00000024471	Myot	13650	ENSMUSG00000020736	Nt5c	8.48571	ENSMUSG00000026837	Col5a1	5.98635	ENSMUSG00000022306	Zfpm2	8.81672
ENSMUSG00000024354	Slc23a1	2.27047	ENSMUSG00000024039	Cbs	2.40203	ENSMUSG00000024479	Mal2	3.12178	ENSMUSG00000020743	Mif4gd	4.6	ENSMUSG00000026874	Hc	3.85897	ENSMUSG00000022353	Mtss1	9.66894
ENSMUSG00000024365	Cyp21a1	111.792	ENSMUSG00000024052	Lpin2	3.19316	ENSMUSG00000024480	Ap3s1	2.44803	ENSMUSG00000020778	Ten1	2.5	ENSMUSG00000026879	Gsn	2.54116	ENSMUSG00000022440	C1qtnf6	15.2857
ENSMUSG00000024371	C2	4.80206	ENSMUSG00000024079	Eif2ak2	3.39903	ENSMUSG00000024481	Lvrn	100.948	ENSMUSG00000020806	Rhbdf2	2.75117	ENSMUSG00000027004	Frzb	3.89585	ENSMUSG00000022442	Ttll1	4.8125
ENSMUSG00000024401	Tnf	41.2459	ENSMUSG00000024096	Ralbp1	2.25267	ENSMUSG00000024511	Rab27b	3.07258	ENSMUSG00000020821	Kif1c	2.14163	ENSMUSG00000027009	Itga4	3.38484	ENSMUSG00000022452	Smdt1	2.36267
ENSMUSG00000024411	Aqp4	51.9623	ENSMUSG00000024130	Abca3	2.5943	ENSMUSG00000024516	Sec11c	3.98777	ENSMUSG00000020828	Pld2	2.53501	ENSMUSG00000027015	Cybrd1	3.07579	ENSMUSG00000022503	Nubp1	2.18485
ENSMUSG00000024421	Lama3	5.63429	ENSMUSG00000024164	C3	77.909	ENSMUSG00000024570	Rbfa	2.26871	ENSMUSG00000020829	Slc46a1	2.56701	ENSMUSG00000027068	Dhrs9	4.52083	ENSMUSG00000022523	Fgf12	11.8889
ENSMUSG00000024424	Ttc39c	2.85577	ENSMUSG00000024245	Tmem178	17.4167	ENSMUSG00000024621	Csf1r	3.38617	ENSMUSG00000020838	Slc6a4	47.4583	ENSMUSG00000027070	Lrp2	4.74699	ENSMUSG00000022577	Ly6h	14.0896
ENSMUSG00000024427	Spry4	2.77372	ENSMUSG00000024270	Slc39a6	3.4531	ENSMUSG00000024661	Fth1	2.25391	ENSMUSG00000020844	Nxn	2.1114	ENSMUSG00000027134	Lpcat4	2.04098	ENSMUSG00000022587	Ly6e	5.04454
ENSMUSG00000024479	Mal2	5.79386	ENSMUSG00000024331	Dsc2	4.66317	ENSMUSG00000024725	Ostf1	3.26812	ENSMUSG00000020857	Nme2	2.16311	ENSMUSG00000027188	Pamr1	2.34065	ENSMUSG00000022594	Lynx1	2.63459
ENSMUSG00000024480	Ap3s1	2.69242	ENSMUSG00000024338	Psmb8	3.81579	ENSMUSG00000024769	Cdc42bpg	2.96464	ENSMUSG00000020865	Abcc3	28.7143	ENSMUSG00000027204	Fbn1	2.81174	ENSMUSG00000022620	Arsa	2.15926
ENSMUSG00000024481	Lvrn	49.8621	ENSMUSG00000024339	Tap2	2.4687	ENSMUSG00000024772	Ehd1	3.37347	ENSMUSG00000020911	Krt19	66.7092	ENSMUSG00000027207	Galk2	2.01987	ENSMUSG00000022651	Retnlg	114.428
ENSMUSG00000024511	Rab27b	3.0746	ENSMUSG00000024349	Tmem173	2.42997	ENSMUSG00000024773	Atg2a	2.69197	ENSMUSG00000020914	Top2a	3.95928	ENSMUSG00000027208	Fgf7	2.64528	ENSMUSG00000022676	Snai2	4.34
ENSMUSG00000024516	Sec11c	3.60856	ENSMUSG00000024365	Cyp21a1	85.7736	ENSMUSG00000024774	Ankrd22	3.40909	ENSMUSG00000020935	Dcakd	2.51852	ENSMUSG00000027230	Creb3l1	6.45427	ENSMUSG00000022747	St3gal6	2.35031
ENSMUSG00000024659	Anxa1	4.63554	ENSMUSG00000024371	C2	2.76607	ENSMUSG00000024777	Ppp2r5b	2.90179	ENSMUSG00000020961	Ston2	2.72768	ENSMUSG00000027281	Slx4ip	2.08252	ENSMUSG00000022754	Tmem45a	4.40684
ENSMUSG00000024713	Pcsk5	2.09021	ENSMUSG00000024401	Tnf	48.1475	ENSMUSG00000024835	Coro1b	2.0849	ENSMUSG00000021047	Nova1	5.43238	ENSMUSG00000027346	Gpcpd1	2.70017	ENSMUSG00000022769	Sdf2l1	3.45161
ENSMUSG00000024725	Ostf1	3.53043	ENSMUSG00000024411	Aqp4	26.4906	ENSMUSG00000024870	Rab1b	2.63696	ENSMUSG00000021065	Fut8	2.42399	ENSMUSG00000027371	Fahd2a	3.0125	ENSMUSG00000022814	Umps	3.2291
ENSMUSG00000024766	Lipo3	2.65126	ENSMUSG00000024421	Lama3	4.81693	ENSMUSG00000024907	Gal	10.7049	ENSMUSG00000021185	9030617O03Rik	2.80672	ENSMUSG00000027408	Cpxm1	3.83556	ENSMUSG00000022816	Fstl1	2.82128
ENSMUSG00000024769	Cdc42bpg	2.72823	ENSMUSG00000024479	Mal2	4.7808	ENSMUSG00000024937	Ehbp1l1	2.21516	ENSMUSG00000021186	Fbln5	2.16374	ENSMUSG00000027412	Lpin3	8.48205	ENSMUSG00000022817	Itgb5	4.23905
ENSMUSG00000024772	Ehd1	4.97779	ENSMUSG00000024480	Ap3s1	2.53652	ENSMUSG00000024952	Rps6ka4	2.77078	ENSMUSG00000021190	Lgmn	2.59864	ENSMUSG00000027459	Fam110a	2.33962	ENSMUSG00000022840	Adcy5	3.65026
ENSMUSG00000024774	Ankrd22	3.40909	ENSMUSG00000024481	Lvrn	53.8276	ENSMUSG00000024953	Prdx5	3.24088	ENSMUSG00000021223	Papln	5.22419	ENSMUSG00000027514	Zbp1	10.6951	ENSMUSG00000022842	Ece2	4.36028
ENSMUSG00000024777	Ppp2r5b	2.6875	ENSMUSG00000024511	Rab27b	2.75605	ENSMUSG00000024955	Esrra	5.39711	ENSMUSG00000021236	Entpd5	2.51055	ENSMUSG00000027593	Raly	2.663	ENSMUSG00000022844	Pdia5	6.25
ENSMUSG00000024818	Slc25a45	2.63063	ENSMUSG00000024516	Sec11c	4.30887	ENSMUSG00000024960	Plcb3	2.14529	ENSMUSG00000021256	Vash1	27.2941	ENSMUSG00000027596	a	3.33708	ENSMUSG00000022965	Ifngr2	2.86749
ENSMUSG00000024833	Pola2	2.44053	ENSMUSG00000024610	Cd74	4	ENSMUSG00000024997	Prdx3	2.3713	ENSMUSG00000021277	Traf3	2.24144	ENSMUSG00000027611	Procr	5.66147	ENSMUSG00000023039	Krt7	25.5045
ENSMUSG00000024835	Coro1b	2.33596	ENSMUSG00000024659	Anxa1	3.85541	ENSMUSG00000025026	Add3	3.27265	ENSMUSG00000021290	2010107E04Rik	2.41795	ENSMUSG00000027663	Zmat3	2.16548	ENSMUSG00000023044	Csad	2.31442
ENSMUSG00000024870	Rab1b	2.46413	ENSMUSG00000024725	Ostf1	3.2	ENSMUSG00000025027	Xpnpep1	5.42885	ENSMUSG00000021303	Gng4	3.04587	ENSMUSG00000027716	Trpc3	6.02752	ENSMUSG00000023046	Igfbp6	2.85447
ENSMUSG00000024922	Ovol1	5.84507	ENSMUSG00000024727	Trpm6	2.22905	ENSMUSG00000025068	Gsto1	5.6621	ENSMUSG00000021313	Ryr2	3.90517	ENSMUSG00000027848	Olfml3	4.4808	ENSMUSG00000023048	Prr13	3.57823
ENSMUSG00000024937	Ehbp1l1	2.29503	ENSMUSG00000024769	Cdc42bpg	2.79175	ENSMUSG00000025069	Gsto2	3.30966	ENSMUSG00000021319	Sfrp4	3.68305	ENSMUSG00000027955	Fam198b	4.875	ENSMUSG00000023094	Msrb2	3.81923
ENSMUSG00000024952	Rps6ka4	3.90349	ENSMUSG00000024772	Ehd1	4.16715	ENSMUSG00000025076	Casp7	3.37931	ENSMUSG00000021361	Tmem14c	4.29412	ENSMUSG00000027962	Vcam1	8.09908	ENSMUSG00000023224	Serping1	2.19762
ENSMUSG00000024953	Prdx5	3.38004	ENSMUSG00000024777	Ppp2r5b	2.8125	ENSMUSG00000025150	Cbr2	8.49477	ENSMUSG00000021368	Tbc1d7	3.70103	ENSMUSG00000027966	Col11a1	2.62939	ENSMUSG00000023249	Parp3	2.9739
ENSMUSG00000024955	Esrra	4.41877	ENSMUSG00000024816	Frmd8	2.11294	ENSMUSG00000025161	Slc16a3	2.62774	ENSMUSG00000021388	Aspn	13.0062	ENSMUSG00000028003	Lrat	16.3924	ENSMUSG00000023367	Tmem176a	7.03409
ENSMUSG00000025026	Add3	2.84143	ENSMUSG00000024818	Slc25a45	2.96396	ENSMUSG00000025184	R3hcc1l	2.01517	ENSMUSG00000021390	Ogn	26.225	ENSMUSG00000028005	Gucy1b3	3.10432	ENSMUSG00000023791	Pigx	2.84956
ENSMUSG00000025027	Xpnpep1	4.60673	ENSMUSG00000024835	Coro1b	2.2923	ENSMUSG00000025185	Loxl4	8.52344	ENSMUSG00000021396	Nxnl2	27	ENSMUSG00000028007	Snx7	2.89109	ENSMUSG00000023868	Pde10a	2.57191
ENSMUSG00000025068	Gsto1	4.86352	ENSMUSG00000024870	Rab1b	2.32391	ENSMUSG00000025196	Cpn1	12.475	ENSMUSG00000021420	Fars2	2.13199	ENSMUSG00000028031	Dkk2	2.42319	ENSMUSG00000023885	Thbs2	15.9837
ENSMUSG00000025069	Gsto2	3.32544	ENSMUSG00000024922	Ovol1	5.02492	ENSMUSG00000025208	Mrpl43	2.77574	ENSMUSG00000021457	Syk	49.5294	ENSMUSG00000028037	Ifi44	7.30909	ENSMUSG00000023913	Pla2g7	3.90523
ENSMUSG00000025076	Casp7	2.97414	ENSMUSG00000024952	Rps6ka4	3.47721	ENSMUSG00000025277	Abhd6	4.09536	ENSMUSG00000021474	Sfxn1	3.92181	ENSMUSG00000028040	Efna4	8.07407	ENSMUSG00000023973	Cnpy3	2.25386
ENSMUSG00000025150	Cbr2	6.99767	ENSMUSG00000024953	Prdx5	3.03359	ENSMUSG00000025283	Sat1	3.33654	ENSMUSG00000021486	Prelid1	2.88257	ENSMUSG00000028072	Ntrk1	3.79412	ENSMUSG00000023992	Trem2	591.542
ENSMUSG00000025161	Slc16a3	4.47445	ENSMUSG00000024955	Esrra	4.67148	ENSMUSG00000025321	Itgb8	3.56673	ENSMUSG00000021497	Txndc15	2.77215	ENSMUSG00000028108	Ecm1	2.59126	ENSMUSG00000024038	Ndufv3	2.49576
ENSMUSG00000025185	Loxl4	8.15625	ENSMUSG00000024960	Plcb3	2.21609	ENSMUSG00000025328	Padi3	13.5312	ENSMUSG00000021520	Uqcrb	2.39319	ENSMUSG00000028111	Ctsk	12.2209	ENSMUSG00000024053	Emilin2	3.16206
ENSMUSG00000025196	Cpn1	8.525	ENSMUSG00000024972	Lgals12	5.36842	ENSMUSG00000025329	Padi1	33.7276	ENSMUSG00000021536	Adcy2	4.04255	ENSMUSG00000028164	Manba	2.40741	ENSMUSG00000024066	Xdh	2.94795
ENSMUSG00000025208	Mrpl43	2.42647	ENSMUSG00000024997	Prdx3	2.14201	ENSMUSG00000025330	Padi4	8.52159	ENSMUSG00000021556	Golm1	4.75523	ENSMUSG00000028197	Col24a1	3.7403	ENSMUSG00000024070	Prkd3	2.44527
ENSMUSG00000025277	Abhd6	3.17268	ENSMUSG00000025026	Add3	2.96417	ENSMUSG00000025417	Pip4k2c	2.34505	ENSMUSG00000021583	Erap1	2.57185	ENSMUSG00000028199	Cryz	2.44828	ENSMUSG00000024079	Eif2ak2	3.17284
ENSMUSG00000025278	Flnb	2.63904	ENSMUSG00000025027	Xpnpep1	4.71442	ENSMUSG00000025466	Fuom	14.1375	ENSMUSG00000021606	Ndufs6	4.14508	ENSMUSG00000028238	Atp6v0d2	20.35	ENSMUSG00000024084	Qpct	8.74545
ENSMUSG00000025283	Sat1	3.41942	ENSMUSG00000025068	Gsto1	3.3968	ENSMUSG00000025467	Prap1	25.4748	ENSMUSG00000021607	Mrpl36	4.03759	ENSMUSG00000028268	Gbp3	6.21586	ENSMUSG00000024140	Epas1	2.71737
ENSMUSG00000025328	Padi3	12.0312	ENSMUSG00000025069	Gsto2	2.97633	ENSMUSG00000025481	Urah	3.45035	ENSMUSG00000021610	Clptm1l	2.26469	ENSMUSG00000028339	Col15a1	3.59407	ENSMUSG00000024142	Mlst8	2.49635
ENSMUSG00000025329	Padi1	25.7967	ENSMUSG00000025076	Casp7	3.97845	ENSMUSG00000025503	Taldo1	4.38928	ENSMUSG00000021643	Serf1	2.56044	ENSMUSG00000028347	Tmeff1	2.24671	ENSMUSG00000024164	C3	10.9692
ENSMUSG00000025330	Padi4	4.8273	ENSMUSG00000025089	Gfra1	4.53333	ENSMUSG00000025534	Gusb	5.50721	ENSMUSG00000021696	Elovl7	5.39474	ENSMUSG00000028369	Svep1	2.09889	ENSMUSG00000024187	Fam234a	7.20883
ENSMUSG00000025383	Il23a	6.42105	ENSMUSG00000025150	Cbr2	6.3875	ENSMUSG00000025572	Tmc6	2.57692	ENSMUSG00000021702	Thbs4	8.06957	ENSMUSG00000028497	Hacd4	2.09437	ENSMUSG00000024208	Uqcc2	5.94
ENSMUSG00000025417	Pip4k2c	2.31166	ENSMUSG00000025161	Slc16a3	3.29684	ENSMUSG00000025647	Shisa5	2.99869	ENSMUSG00000021728	Emb	11.8245	ENSMUSG00000028597	Gpx7	3.33333	ENSMUSG00000024256	Adcyap1	53.0938
ENSMUSG00000025432	Avil	6.73981	ENSMUSG00000025185	Loxl4	3.89844	ENSMUSG00000025779	Ly96	3.23377	ENSMUSG00000021758	Ddx4	160.75	ENSMUSG00000028641	P3h1	2.8583	ENSMUSG00000024331	Dsc2	5.5
ENSMUSG00000025464	Paox	3.84864	ENSMUSG00000025196	Cpn1	8.6125	ENSMUSG00000025791	Pgm2	2.92073	ENSMUSG00000021759	Plpp1	2.28214	ENSMUSG00000028673	Fuca1	2.52988	ENSMUSG00000024413	Npc1	2.20644
ENSMUSG00000025466	Fuom	54.9577	ENSMUSG00000025283	Sat1	3.46422	ENSMUSG00000025823	Pdia4	2.29335	ENSMUSG00000021760	Gpx8	5.3563	ENSMUSG00000028713	Cyp4b1	3.2695	ENSMUSG00000024424	Ttc39c	2.54693
ENSMUSG00000025467	Prap1	104.673	ENSMUSG00000025321	Itgb8	2.92899	ENSMUSG00000025854	Fam20c	3.4531	ENSMUSG00000021792	Fam213a	4.04148	ENSMUSG00000028719	Cmpk1	2.83619	ENSMUSG00000024480	Ap3s1	2.7194
ENSMUSG00000025473	Adam8	4.59712	ENSMUSG00000025328	Padi3	13.1562	ENSMUSG00000025871	4833439L19Rik	2.7312	ENSMUSG00000021822	Plau	4.74885	ENSMUSG00000028763	Hspg2	2.93132	ENSMUSG00000024481	Lvrn	10.2951
ENSMUSG00000025481	Urah	6.2014	ENSMUSG00000025329	Padi1	24.4849	ENSMUSG00000025903	Lypla1	2.36633	ENSMUSG00000021917	Spcs1	2.33626	ENSMUSG00000028766	Alpl	5.45205	ENSMUSG00000024511	Rab27b	11.3684
ENSMUSG00000025498	Irf7	5.9697	ENSMUSG00000025330	Padi4	4.8168	ENSMUSG00000025921	Rdh10	6.54185	ENSMUSG00000021939	Ctsb	2.62322	ENSMUSG00000028776	Tinagl1	3.30238	ENSMUSG00000024529	Lox	6.455
ENSMUSG00000025503	Taldo1	3.84833	ENSMUSG00000025359	Pmel	3.27523	ENSMUSG00000025934	Gsta3	15.0625	ENSMUSG00000021944	Gata4	334.913	ENSMUSG00000028804	Csmd2	36.75	ENSMUSG00000024538	Ppic	4.07614
ENSMUSG00000025534	Gusb	5.42548	ENSMUSG00000025383	Il23a	5.96053	ENSMUSG00000025938	Slco5a1	2.3561	ENSMUSG00000021950	Anxa8	615	ENSMUSG00000028871	Rspo1	3.08357	ENSMUSG00000024598	Fbn2	11.1548
ENSMUSG00000025572	Tmc6	2.65976	ENSMUSG00000025417	Pip4k2c	2.24546	ENSMUSG00000025993	Slc40a1	5.3465	ENSMUSG00000021974	Fgf9	18.5245	ENSMUSG00000028927	Padi2	31.6585	ENSMUSG00000024601	Isoc1	2.40171
ENSMUSG00000025647	Shisa5	3.9954	ENSMUSG00000025432	Avil	7.47022	ENSMUSG00000026090	2010300C02Rik	3.34778	ENSMUSG00000021991	Cacna2d3	9.12371	ENSMUSG00000028980	H6pd	2.25705	ENSMUSG00000024646	Cyb5a	2.93685
ENSMUSG00000025779	Ly96	3.61688	ENSMUSG00000025464	Paox	4.22084	ENSMUSG00000026110	Mgat4a	4.89357	ENSMUSG00000021994	Wnt5a	2.60525	ENSMUSG00000029005	Draxin	3.58125	ENSMUSG00000024659	Anxa1	2.45364
ENSMUSG00000025791	Pgm2	3.35976	ENSMUSG00000025466	Fuom	30.574	ENSMUSG00000026123	Plekhb2	4.10532	ENSMUSG00000021996	Esd	2.83303	ENSMUSG00000029033	Acap3	2.54254	ENSMUSG00000024691	Fam111a	2.5354
ENSMUSG00000025854	Fam20c	4.17329	ENSMUSG00000025467	Prap1	53.802	ENSMUSG00000026126	Ptpn18	3.40777	ENSMUSG00000021998	Lcp1	7.78723	ENSMUSG00000029061	Mmp23	4.01527	ENSMUSG00000024713	Pcsk5	3.59097
ENSMUSG00000025871	4833439L19Rik	2.40111	ENSMUSG00000025473	Adam8	3.45204	ENSMUSG00000026220	Slc16a14	34.0377	ENSMUSG00000022013	Dnajc15	4.29114	ENSMUSG00000029070	Mxra8	2.74915	ENSMUSG00000024725	Ostf1	2.20153
ENSMUSG00000025921	Rdh10	4.59071	ENSMUSG00000025481	Urah	6.15804	ENSMUSG00000026288	Inpp5d	4.58442	ENSMUSG00000022015	Tnfsf11	40.1667	ENSMUSG00000029096	Htra3	3.54646	ENSMUSG00000024735	Prpf19	2.79819
ENSMUSG00000025934	Gsta3	9.1875	ENSMUSG00000025498	Irf7	7.8125	ENSMUSG00000026303	Mlph	2.43672	ENSMUSG00000022021	Diaph3	10.0682	ENSMUSG00000029120	Ppp2r2c	9.68182	ENSMUSG00000024736	Tmem132a	6.68354
ENSMUSG00000025938	Slco5a1	2.25772	ENSMUSG00000025503	Taldo1	3.79676	ENSMUSG00000026365	Cfh	3.92467	ENSMUSG00000022037	Clu	6.50217	ENSMUSG00000029121	Crmp1	4.91667	ENSMUSG00000024737	Slc15a3	3.23359
ENSMUSG00000025993	Slc40a1	4.82492	ENSMUSG00000025534	Gusb	6.7476	ENSMUSG00000026387	Sctr	30250	ENSMUSG00000022040	Ephx2	2.67857	ENSMUSG00000029163	Emilin1	3.06789	ENSMUSG00000024772	Ehd1	3.71367
ENSMUSG00000026031	Cflar	2.69173	ENSMUSG00000025572	Tmc6	2.70858	ENSMUSG00000026405	C4bp	25.6411	ENSMUSG00000022044	Stmn4	3.80247	ENSMUSG00000029298	Gbp9	5.42105	ENSMUSG00000024776	Stambpl1	2.83497
ENSMUSG00000026068	Il18rap	5.46739	ENSMUSG00000025647	Shisa5	3.86268	ENSMUSG00000026417	Pigr	16.0833	ENSMUSG00000022098	Bmp1	3.20115	ENSMUSG00000029322	Plac8	4.27669	ENSMUSG00000024777	Ppp2r5b	3.55
ENSMUSG00000026090	2010300C02Rik	2.65738	ENSMUSG00000025779	Ly96	4.12338	ENSMUSG00000026430	Rassf5	2.6875	ENSMUSG00000022111	Uchl3	2.47718	ENSMUSG00000029335	Bmp3	5.87071	ENSMUSG00000024781	Lipa	3.52925
ENSMUSG00000026110	Mgat4a	6.85147	ENSMUSG00000025791	Pgm2	2.90549	ENSMUSG00000026435	Slc45a3	6.77966	ENSMUSG00000022125	Cln5	2.87017	ENSMUSG00000029371	Cxcl5	14.0667	ENSMUSG00000024883	Rin1	2.5885
ENSMUSG00000026123	Plekhb2	4.08897	ENSMUSG00000025823	Pdia4	2.18709	ENSMUSG00000026437	Cdk18	2.70633	ENSMUSG00000022150	Dab2	2.5588	ENSMUSG00000029380	Cxcl1	3.27412	ENSMUSG00000024952	Rps6ka4	2.80072
ENSMUSG00000026126	Ptpn18	2.32147	ENSMUSG00000025854	Fam20c	4.01192	ENSMUSG00000026520	Pycr2	2.40426	ENSMUSG00000022175	Lrp10	3.05225	ENSMUSG00000029442	Wdr66	3.99371	ENSMUSG00000024958	Gpr137	3.98765
ENSMUSG00000026220	Slc16a14	27.2524	ENSMUSG00000025871	4833439L19Rik	2.65042	ENSMUSG00000026535	Ifi202b	6.36364	ENSMUSG00000022193	Psmb5	4.05172	ENSMUSG00000029470	P2rx4	2.27376	ENSMUSG00000024968	Rcor2	3.41667
ENSMUSG00000026278	Bok	3.94805	ENSMUSG00000025875	Tspan17	4.53846	ENSMUSG00000026579	F5	4.13475	ENSMUSG00000022208	Jph4	3.0177	ENSMUSG00000029484	Anxa3	9.86649	ENSMUSG00000024978	Gpam	8.37849
ENSMUSG00000026288	Inpp5d	3.86364	ENSMUSG00000025903	Lypla1	2.06105	ENSMUSG00000026617	Bpnt1	2.53179	ENSMUSG00000022210	Dhrs4	4.98883	ENSMUSG00000029510	Gpc2	3.35025	ENSMUSG00000024981	Acsl5	2.44278
ENSMUSG00000026303	Mlph	3.4388	ENSMUSG00000025921	Rdh10	4.79446	ENSMUSG00000026639	Lamb3	5.05318	ENSMUSG00000022216	Psme1	2.26741	ENSMUSG00000029561	Oasl2	5.94617	ENSMUSG00000024997	Prdx3	2.15652
ENSMUSG00000026365	Cfh	3.86016	ENSMUSG00000025934	Gsta3	7.25	ENSMUSG00000026688	Mgst3	3.95541	ENSMUSG00000022217	Emc9	2.67333	ENSMUSG00000029598	Plbd2	2.7243	ENSMUSG00000025007	Aldh18a1	2.11122
ENSMUSG00000026387	Sctr	11850	ENSMUSG00000025993	Slc40a1	6.25289	ENSMUSG00000026755	Arpc5l	2.10132	ENSMUSG00000022221	Ripk3	3.99024	ENSMUSG00000029661	Col1a2	21.6712	ENSMUSG00000025017	Pik3ap1	7.81481
ENSMUSG00000026405	C4bp	11.3684	ENSMUSG00000026043	Col3a1	3.28061	ENSMUSG00000026820	Ptges2	2.39702	ENSMUSG00000022257	Laptm4b	3.22719	ENSMUSG00000029675	Eln	9.87129	ENSMUSG00000025027	Xpnpep1	3.21291
ENSMUSG00000026417	Pigr	11.7203	ENSMUSG00000026068	Il18rap	9.46739	ENSMUSG00000026822	Lcn2	27.5044	ENSMUSG00000022306	Zfpm2	9.48553	ENSMUSG00000029718	Pcolce	6.25408	ENSMUSG00000025089	Gfra1	43.5261
ENSMUSG00000026435	Slc45a3	7.9548	ENSMUSG00000026090	2010300C02Rik	2.48091	ENSMUSG00000026827	Gpd2	2.48019	ENSMUSG00000022337	Emc2	2.30135	ENSMUSG00000029759	Pon3	2.36604	ENSMUSG00000025105	Bnc1	33.6761
ENSMUSG00000026479	Lamc2	2.47344	ENSMUSG00000026104	Stat1	2.27067	ENSMUSG00000026833	Olfm1	15.6381	ENSMUSG00000022353	Mtss1	8.50974	ENSMUSG00000029810	Tmem176b	2.24345	ENSMUSG00000025188	Hps1	3.24324
ENSMUSG00000026480	Ncf2	3.34496	ENSMUSG00000026110	Mgat4a	5.97474	ENSMUSG00000026856	Dolpp1	3.50718	ENSMUSG00000022354	Ndufb9	3.09011	ENSMUSG00000029811	Aoc1	91.375	ENSMUSG00000025190	Got1	2.37041
ENSMUSG00000026520	Pycr2	2.57979	ENSMUSG00000026123	Plekhb2	3.81255	ENSMUSG00000026875	Traf1	4.90244	ENSMUSG00000022440	C1qtnf6	9.09524	ENSMUSG00000029878	Dbpht2	3.78704	ENSMUSG00000025203	Scd2	3.4706
ENSMUSG00000026535	Ifi202b	14.5275	ENSMUSG00000026166	Ccl20	13.5215	ENSMUSG00000026922	Agpat2	5.41828	ENSMUSG00000022442	Ttll1	7.33333	ENSMUSG00000030029	Lrig1	2.5814	ENSMUSG00000025212	Sfxn3	2.82014
ENSMUSG00000026536	Ifi211	13.1458	ENSMUSG00000026209	Dnpep	2.25714	ENSMUSG00000026938	Fcna	29.1013	ENSMUSG00000022452	Smdt1	2.70667	ENSMUSG00000030107	Usp18	3.84167	ENSMUSG00000025232	Hexa	2.72395
ENSMUSG00000026639	Lamb3	6.53964	ENSMUSG00000026220	Slc16a14	29.25	ENSMUSG00000026961	Lrrc26	4.47872	ENSMUSG00000022469	Rapgef3	3.32184	ENSMUSG00000030111	A2m	298.661	ENSMUSG00000025236	Adpgk	2.0944
ENSMUSG00000026688	Mgst3	7.21656	ENSMUSG00000026288	Inpp5d	3.76623	ENSMUSG00000026981	Il1rn	8.52778	ENSMUSG00000022503	Nubp1	2.3303	ENSMUSG00000030116	Mfap5	3.73769	ENSMUSG00000025255	Zfhx4	4.8087
ENSMUSG00000026822	Lcn2	29.1608	ENSMUSG00000026303	Mlph	5.4305	ENSMUSG00000026984	Il1f6	10.6548	ENSMUSG00000022523	Fgf12	9.46296	ENSMUSG00000030162	Olr1	10.36	ENSMUSG00000025268	Maged2	2.27503
ENSMUSG00000026827	Gpd2	2.74358	ENSMUSG00000026365	Cfh	3.8817	ENSMUSG00000026985	Il1f8	38.8889	ENSMUSG00000022557	Bop1	2.24838	ENSMUSG00000030220	Arhgdib	3.62069	ENSMUSG00000025277	Abhd6	2.62281
ENSMUSG00000026833	Olfm1	23.0628	ENSMUSG00000026405	C4bp	5.36364	ENSMUSG00000026986	Hnmt	3.41935	ENSMUSG00000022561	Gpaa1	2.26244	ENSMUSG00000030268	Bcat1	3.85465	ENSMUSG00000025329	Padi1	28.0462
ENSMUSG00000026856	Dolpp1	3.2823	ENSMUSG00000026417	Pigr	15.6282	ENSMUSG00000026994	Galnt3	3.06708	ENSMUSG00000022575	Gsdmd	2.6843	ENSMUSG00000030560	Ctsc	4.99816	ENSMUSG00000025371	Chmp6	2.03106
ENSMUSG00000026875	Traf1	5.27051	ENSMUSG00000026420	Il24	5.28571	ENSMUSG00000027068	Dhrs9	5.15087	ENSMUSG00000022577	Ly6h	6.52239	ENSMUSG00000030562	Nox4	4	ENSMUSG00000025381	Cnpy2	2.64954
ENSMUSG00000026880	Stom	2.34766	ENSMUSG00000026435	Slc45a3	8.15819	ENSMUSG00000027070	Lrp2	6.09715	ENSMUSG00000022587	Ly6e	8.05568	ENSMUSG00000030605	Mfge8	3.0235	ENSMUSG00000025465	Echs1	2.38028
ENSMUSG00000026922	Agpat2	3.44044	ENSMUSG00000026480	Ncf2	2.94961	ENSMUSG00000027134	Lpcat4	19.9718	ENSMUSG00000022594	Lynx1	2.3417	ENSMUSG00000030621	Me3	4.45293	ENSMUSG00000025503	Taldo1	3.12617
ENSMUSG00000026938	Fcna	29.3866	ENSMUSG00000026520	Pycr2	2.89894	ENSMUSG00000027274	Mkks	2.40084	ENSMUSG00000022610	Mapk12	2.42424	ENSMUSG00000030623	Prss23os	8.73893	ENSMUSG00000025504	Eps8l2	4.50746
ENSMUSG00000026959	Grin1	4.32857	ENSMUSG00000026525	Opn3	2.75	ENSMUSG00000027315	Spint1	2.56165	ENSMUSG00000022636	Alcam	2.83172	ENSMUSG00000030717	Nupr1	6.14122	ENSMUSG00000025534	Gusb	3.25403
ENSMUSG00000026961	Lrrc26	5.76596	ENSMUSG00000026535	Ifi202b	9.59937	ENSMUSG00000027316	Gfra4	6.41509	ENSMUSG00000022651	Retnlg	144.279	ENSMUSG00000030824	Nucb1	2.14142	ENSMUSG00000025647	Shisa5	2.48172
ENSMUSG00000026981	Il1rn	18.3333	ENSMUSG00000026536	Ifi211	9.08333	ENSMUSG00000027318	Adam33	9.68323	ENSMUSG00000022665	Ccdc80	2.20121	ENSMUSG00000030854	Ptpn5	57.122	ENSMUSG00000025791	Pgm2	4.39935
ENSMUSG00000026984	Il1f6	24.6468	ENSMUSG00000026639	Lamb3	4.72969	ENSMUSG00000027347	Rasgrp1	14.7136	ENSMUSG00000022676	Snai2	4.50667	ENSMUSG00000030865	Chp2	4.75701	ENSMUSG00000025810	Nrp1	6.04944
ENSMUSG00000026985	Il1f8	45.4444	ENSMUSG00000026688	Mgst3	6.47134	ENSMUSG00000027359	Slc27a2	6.53879	ENSMUSG00000022706	Mrpl40	2.39855	ENSMUSG00000030872	Gga2	2.17379	ENSMUSG00000025868	Higd2a	2.26367
ENSMUSG00000026994	Galnt3	4.03687	ENSMUSG00000026822	Lcn2	29.5151	ENSMUSG00000027366	Sppl2a	2.47619	ENSMUSG00000022747	St3gal6	2.77831	ENSMUSG00000030873	Scnn1b	3.93966	ENSMUSG00000025875	Tspan17	4.27711
ENSMUSG00000027068	Dhrs9	8.7207	ENSMUSG00000026827	Gpd2	2.55139	ENSMUSG00000027386	Fbln7	3.53814	ENSMUSG00000022754	Tmem45a	4.55133	ENSMUSG00000030921	Trim30a	4.97802	ENSMUSG00000025885	Myo5b	42.6098
ENSMUSG00000027134	Lpcat4	17.5254	ENSMUSG00000026833	Olfm1	10.5753	ENSMUSG00000027399	Il1a	39.5012	ENSMUSG00000022755	Adgrg7	22	ENSMUSG00000031004	Mki67	3.25967	ENSMUSG00000025903	Lypla1	2.26167
ENSMUSG00000027315	Spint1	3.95436	ENSMUSG00000026856	Dolpp1	3.77512	ENSMUSG00000027456	Sdcbp2	6.6131	ENSMUSG00000022756	Slc7a4	6.42169	ENSMUSG00000031070	Mrgprf	3.0125	ENSMUSG00000025937	Lactb2	2.07572
ENSMUSG00000027318	Adam33	5.13665	ENSMUSG00000026875	Traf1	4.41907	ENSMUSG00000027508	Pag1	4.69508	ENSMUSG00000022769	Sdf2l1	3.17419	ENSMUSG00000031129	Slc9a9	5.53191	ENSMUSG00000025938	Slco5a1	4.30994
ENSMUSG00000027331	Knstrn	2.39271	ENSMUSG00000026896	Ifih1	2.37196	ENSMUSG00000027533	Fabp5	64.2793	ENSMUSG00000022793	B4galt4	4.33663	ENSMUSG00000031149	Praf2	2.86667	ENSMUSG00000025950	Idh1	11.3551
ENSMUSG00000027347	Rasgrp1	7.13146	ENSMUSG00000026938	Fcna	32.097	ENSMUSG00000027546	Atp9a	2.44603	ENSMUSG00000022814	Umps	2.55809	ENSMUSG00000031209	Heph	2.70805	ENSMUSG00000025955	Akr1cl	130.673
ENSMUSG00000027359	Slc27a2	4.05603	ENSMUSG00000026961	Lrrc26	5.24468	ENSMUSG00000027562	Car2	5.5961	ENSMUSG00000022816	Fstl1	2.11631	ENSMUSG00000031239	Itm2a	4.36541	ENSMUSG00000025964	Adam23	5.07143
ENSMUSG00000027366	Sppl2a	2.33794	ENSMUSG00000026981	Il1rn	10.9236	ENSMUSG00000027605	Acss2	4.47697	ENSMUSG00000022817	Itgb5	2.27924	ENSMUSG00000031253	Srpx2	49.3333	ENSMUSG00000026029	Casp8	2.90196
ENSMUSG00000027377	Mall	3.62406	ENSMUSG00000026984	Il1f6	15.0794	ENSMUSG00000027642	Rpn2	2.58627	ENSMUSG00000022820	Ndufb4	3.02299	ENSMUSG00000031342	Gpm6b	2.16368	ENSMUSG00000026042	Col5a2	4.24806
ENSMUSG00000027386	Fbln7	3.63983	ENSMUSG00000026985	Il1f8	39.3333	ENSMUSG00000027651	Rprd1b	10.2436	ENSMUSG00000022840	Adcy5	2.37162	ENSMUSG00000031343	Gabra3	3.11111	ENSMUSG00000026043	Col3a1	8.07732
ENSMUSG00000027399	Il1a	71.0847	ENSMUSG00000026986	Hnmt	3.5914	ENSMUSG00000027663	Zmat3	3.47917	ENSMUSG00000022842	Ece2	2.80139	ENSMUSG00000031375	Bgn	2.36135	ENSMUSG00000026047	Kdelc1	2.36585
ENSMUSG00000027456	Sdcbp2	18.1726	ENSMUSG00000026994	Galnt3	3.63287	ENSMUSG00000027808	Serp1	2.45276	ENSMUSG00000022844	Pdia5	6.11207	ENSMUSG00000031380	Vegfd	3.76131	ENSMUSG00000026069	Il1rl1	83
ENSMUSG00000027508	Pag1	3.15966	ENSMUSG00000027068	Dhrs9	6.81796	ENSMUSG00000027822	Slc33a1	4.50386	ENSMUSG00000022865	Cxadr	7.32956	ENSMUSG00000031451	Gas6	2.76596	ENSMUSG00000026090	2010300C02Rik	17.7727
ENSMUSG00000027533	Fabp5	29.5045	ENSMUSG00000027134	Lpcat4	16.5028	ENSMUSG00000027845	Dclre1b	3.2383	ENSMUSG00000022956	Atp5o	2.24065	ENSMUSG00000031502	Col4a1	4.16212	ENSMUSG00000026109	Tmeff2	7.05155
ENSMUSG00000027562	Car2	6.85644	ENSMUSG00000027314	Dll4	2.88081	ENSMUSG00000027849	Syt6	4.05042	ENSMUSG00000022965	Ifngr2	2.5371	ENSMUSG00000031503	Col4a2	4.99102	ENSMUSG00000026112	Coa5	2.158
ENSMUSG00000027569	Mrgbp	2.05568	ENSMUSG00000027315	Spint1	3.31825	ENSMUSG00000027900	Dram2	3.14536	ENSMUSG00000023039	Krt7	51.4595	ENSMUSG00000031517	Gpm6a	4.64744	ENSMUSG00000026155	Smap1	2.36015
ENSMUSG00000027605	Acss2	3.01316	ENSMUSG00000027317	Ppp1r14d	45.9082	ENSMUSG00000027901	Dennd2d	2.09774	ENSMUSG00000023043	Krt18	4.95556	ENSMUSG00000031521	Aga	2.62802	ENSMUSG00000026156	B3gat2	2.32148
ENSMUSG00000027636	Sla2	2.25957	ENSMUSG00000027318	Adam33	2.68323	ENSMUSG00000027956	Tmem144	3.19643	ENSMUSG00000023044	Csad	2.28369	ENSMUSG00000031554	Adam5	2.23529	ENSMUSG00000026193	Fn1	2.17979
ENSMUSG00000027642	Rpn2	2.39239	ENSMUSG00000027331	Knstrn	2.8583	ENSMUSG00000027997	Casp6	2.39164	ENSMUSG00000023046	Igfbp6	3.19726	ENSMUSG00000031557	Plekha2	2.24101	ENSMUSG00000026200	Glb1l	2.26179
ENSMUSG00000027651	Rprd1b	9.12946	ENSMUSG00000027347	Rasgrp1	3.89202	ENSMUSG00000028003	Lrat	30.6444	ENSMUSG00000023048	Prr13	5.46259	ENSMUSG00000031595	Pdgfrl	4.38462	ENSMUSG00000026220	Slc16a14	16.35
ENSMUSG00000027822	Slc33a1	2.9126	ENSMUSG00000027359	Slc27a2	3.09052	ENSMUSG00000028007	Snx7	4.1528	ENSMUSG00000023094	Msrb2	3.40385	ENSMUSG00000031596	Slc7a2	4.41598	ENSMUSG00000026241	Nppc	20.3987
ENSMUSG00000027900	Dram2	2.54511	ENSMUSG00000027366	Sppl2a	2.61751	ENSMUSG00000028015	Ctso	2.07014	ENSMUSG00000023175	Bsg	2.77188	ENSMUSG00000031613	Hpgd	3.38861	ENSMUSG00000026247	Ecel1	38.5556
ENSMUSG00000027956	Tmem144	3.22321	ENSMUSG00000027377	Mall	3.96241	ENSMUSG00000028037	Ifi44	4.51592	ENSMUSG00000023224	Serping1	2.52118	ENSMUSG00000031782	Coq9	2.14839	ENSMUSG00000026303	Mlph	10.0667
ENSMUSG00000027994	Ccdc109b	8.56338	ENSMUSG00000027386	Fbln7	6.29661	ENSMUSG00000028040	Efna4	3.06923	ENSMUSG00000023232	Serinc2	3.32824	ENSMUSG00000031807	Pgls	3.22652	ENSMUSG00000026315	Serpinb8	3.5102
ENSMUSG00000028003	Lrat	17.8778	ENSMUSG00000027399	Il1a	49.1953	ENSMUSG00000028048	Gba	2.75345	ENSMUSG00000023236	Scg5	3.25	ENSMUSG00000031824	6430548M08Rik	4.01093	ENSMUSG00000026343	Gpr39	11.1429
ENSMUSG00000028007	Snx7	6.77353	ENSMUSG00000027423	Snx5	2.39886	ENSMUSG00000028062	Lamtor2	2.71642	ENSMUSG00000023249	Parp3	2.97182	ENSMUSG00000031825	Crispld2	3.8217	ENSMUSG00000026344	Lypd1	11.2791
ENSMUSG00000028015	Ctso	2.21763	ENSMUSG00000027456	Sdcbp2	11.9583	ENSMUSG00000028064	Sema4a	4.29833	ENSMUSG00000023367	Tmem176a	12.3614	ENSMUSG00000031870	Pgr	2.98748	ENSMUSG00000026417	Pigr	20.8706
ENSMUSG00000028037	Ifi44	11.1975	ENSMUSG00000027508	Pag1	3.51261	ENSMUSG00000028073	Pear1	2.45494	ENSMUSG00000023791	Pigx	2.80531	ENSMUSG00000031875	Cmtm3	2.12333	ENSMUSG00000026435	Slc45a3	3.17188
ENSMUSG00000028040	Efna4	2.53077	ENSMUSG00000027514	Zbp1	4.04595	ENSMUSG00000028082	Sh3d19	2.36544	ENSMUSG00000023861	Mpc1	2	ENSMUSG00000031891	Hsd11b2	65.5954	ENSMUSG00000026442	Nfasc	3.98454
ENSMUSG00000028048	Gba	2.80862	ENSMUSG00000027533	Fabp5	41.4234	ENSMUSG00000028121	Bcar3	2.70487	ENSMUSG00000023885	Thbs2	15.1593	ENSMUSG00000031932	Gpr83	21.2917	ENSMUSG00000026478	Lamc1	2.16848
ENSMUSG00000028062	Lamtor2	2.65672	ENSMUSG00000027562	Car2	6.86954	ENSMUSG00000028132	Tmem56	14.1661	ENSMUSG00000023913	Pla2g7	3.4768	ENSMUSG00000031963	Bmper	3.96296	ENSMUSG00000026483	Fam129a	2.08425
ENSMUSG00000028073	Pear1	3.64807	ENSMUSG00000027605	Acss2	4.64145	ENSMUSG00000028185	Dnase2b	23700	ENSMUSG00000023918	Adgrf4	16.5556	ENSMUSG00000031980	Agt	14.2353	ENSMUSG00000026532	Spta1	78.5625
ENSMUSG00000028082	Sh3d19	2.41784	ENSMUSG00000027636	Sla2	2.65532	ENSMUSG00000028186	Uox	249.245	ENSMUSG00000023992	Trem2	770.149	ENSMUSG00000031983	2310022B05Rik	2.54479	ENSMUSG00000026574	Dpt	2.09981
ENSMUSG00000028121	Bcar3	4.24928	ENSMUSG00000027642	Rpn2	2.87834	ENSMUSG00000028255	Clca1	12.4286	ENSMUSG00000024007	Ppil1	2.93333	ENSMUSG00000031997	Trpc6	3.46643	ENSMUSG00000026579	F5	12.0638
ENSMUSG00000028132	Tmem56	6.92203	ENSMUSG00000027651	Rprd1b	9.36543	ENSMUSG00000028262	Clca3a2	4.38213	ENSMUSG00000024038	Ndufv3	2.63559	ENSMUSG00000032012	Nectin1	2.21336	ENSMUSG00000026589	Sec16b	3.12461
ENSMUSG00000028164	Manba	2.23191	ENSMUSG00000027692	Tnik	2.24431	ENSMUSG00000028293	Slc35a1	2.68016	ENSMUSG00000024053	Emilin2	3.46996	ENSMUSG00000032014	Oaf	2.27764	ENSMUSG00000026605	Cenpf	7.87097
ENSMUSG00000028185	Dnase2b	32400	ENSMUSG00000027808	Serp1	2.30221	ENSMUSG00000028328	Tmod1	2.08176	ENSMUSG00000024066	Xdh	2.34296	ENSMUSG00000032026	Rexo2	2.47141	ENSMUSG00000026688	Mgst3	2.17308
ENSMUSG00000028186	Uox	242.612	ENSMUSG00000027822	Slc33a1	3.41645	ENSMUSG00000028337	Coro2a	2.57967	ENSMUSG00000024070	Prkd3	2.11874	ENSMUSG00000032060	Cryab	3.77564	ENSMUSG00000026728	Vim	3.12144
ENSMUSG00000028255	Clca1	43.4468	ENSMUSG00000027900	Dram2	2.86341	ENSMUSG00000028392	Bspry	2.2471	ENSMUSG00000024078	Ttc27	2.73221	ENSMUSG00000032067	Pts	3.12121	ENSMUSG00000026779	Mastl	4.85207
ENSMUSG00000028262	Clca3a2	4.57804	ENSMUSG00000027956	Tmem144	3.27679	ENSMUSG00000028419	Chmp5	2.81024	ENSMUSG00000024079	Eif2ak2	4.33862	ENSMUSG00000032122	Slc37a2	3.92105	ENSMUSG00000026817	Ak1	14.747
ENSMUSG00000028268	Gbp3	4.09937	ENSMUSG00000027994	Ccdc109b	7.43662	ENSMUSG00000028454	Pigo	2.3219	ENSMUSG00000024084	Qpct	5.4562	ENSMUSG00000032291	Crabp1	5.76471	ENSMUSG00000026822	Lcn2	21
ENSMUSG00000028337	Coro2a	2.80499	ENSMUSG00000027995	Tlr2	3.72768	ENSMUSG00000028466	Creb3	2.26514	ENSMUSG00000024099	Ndufv2	2.21046	ENSMUSG00000032332	Col12a1	3.34795	ENSMUSG00000026825	Dnm1	2.43773
ENSMUSG00000028392	Bspry	3.13385	ENSMUSG00000027997	Casp6	2.54308	ENSMUSG00000028467	Gba2	2.63174	ENSMUSG00000024132	Eci1	2.09852	ENSMUSG00000032334	Loxl1	3.95012	ENSMUSG00000026828	Galnt5	22.85
ENSMUSG00000028403	Zdhhc21	2.42911	ENSMUSG00000028003	Lrat	12.8	ENSMUSG00000028468	Rgp1	2.53435	ENSMUSG00000024140	Epas1	2.76958	ENSMUSG00000032353	Tmed3	4.92153	ENSMUSG00000026829	Gbgt1	3.86179
ENSMUSG00000028419	Chmp5	2.95634	ENSMUSG00000028007	Snx7	7.40655	ENSMUSG00000028494	Plin2	2.36561	ENSMUSG00000024142	Mlst8	2.71533	ENSMUSG00000032359	Ctsh	3.41695	ENSMUSG00000026832	Cytip	10.4167
ENSMUSG00000028463	Car9	3.352	ENSMUSG00000028037	Ifi44	19.7197	ENSMUSG00000028527	Ak4	2.48387	ENSMUSG00000024164	C3	16.9826	ENSMUSG00000032363	Adamts7	2.44981	ENSMUSG00000026837	Col5a1	6.30484
ENSMUSG00000028467	Gba2	2.11826	ENSMUSG00000028048	Gba	3.19138	ENSMUSG00000028536	2610528J11Rik	5.26744	ENSMUSG00000024165	Hn1l	3.12397	ENSMUSG00000032373	Car12	10.3091	ENSMUSG00000026879	Gsn	3.00055
ENSMUSG00000028468	Rgp1	2.2341	ENSMUSG00000028073	Pear1	3.75393	ENSMUSG00000028544	Slc5a9	21.2732	ENSMUSG00000024187	Fam234a	10.9593	ENSMUSG00000032374	Plod2	4.4136	ENSMUSG00000026895	Ndufa8	2.76471
ENSMUSG00000028494	Plin2	2.66502	ENSMUSG00000028121	Bcar3	3.58739	ENSMUSG00000028555	Ttc39a	2.38195	ENSMUSG00000024208	Uqcc2	11.58	ENSMUSG00000032431	Crtap	2.27884	ENSMUSG00000026981	Il1rn	31.2222
ENSMUSG00000028527	Ak4	4.48387	ENSMUSG00000028132	Tmem56	4.74576	ENSMUSG00000028563	Tm2d1	2.42662	ENSMUSG00000024256	Adcyap1	41.3174	ENSMUSG00000032496	Ltf	11.7375	ENSMUSG00000027004	Frzb	5.00408
ENSMUSG00000028536	2610528J11Rik	3.44186	ENSMUSG00000028185	Dnase2b	21400	ENSMUSG00000028581	Laptm5	2.62469	ENSMUSG00000024331	Dsc2	8.54167	ENSMUSG00000032500	Dclk3	21.9	ENSMUSG00000027010	Slc25a12	2.75835
ENSMUSG00000028544	Slc5a9	11.1561	ENSMUSG00000028186	Uox	215.449	ENSMUSG00000028602	Tnfrsf8	106.188	ENSMUSG00000024357	Sil1	2.42173	ENSMUSG00000032537	Ephb1	6.02703	ENSMUSG00000027015	Cybrd1	13.1491
ENSMUSG00000028581	Laptm5	2.85894	ENSMUSG00000028243	Ubxn2b	2.18214	ENSMUSG00000028618	Tmem59	2.2635	ENSMUSG00000024371	C2	5.74604	ENSMUSG00000032548	Slco2a1	14.7436	ENSMUSG00000027068	Dhrs9	27.2292
ENSMUSG00000028602	Tnfrsf8	75.8483	ENSMUSG00000028255	Clca1	25.5816	ENSMUSG00000028621	Cyb5rl	2.46104	ENSMUSG00000024376	Epb41l4a	2.76978	ENSMUSG00000032554	Trf	5.07035	ENSMUSG00000027070	Lrp2	20.0241
ENSMUSG00000028655	Mfsd2a	2.35971	ENSMUSG00000028262	Clca3a2	4.31109	ENSMUSG00000028645	Slc2a1	2.44985	ENSMUSG00000024413	Npc1	2.11969	ENSMUSG00000032572	Col6a4	28.2115	ENSMUSG00000027074	Slc43a3	3.28786
ENSMUSG00000028664	Ephb2	2.18845	ENSMUSG00000028268	Gbp3	4.89852	ENSMUSG00000028671	Gale	11.2545	ENSMUSG00000024424	Ttc39c	3.65049	ENSMUSG00000032584	Mst1r	2.31948	ENSMUSG00000027134	Lpcat4	5.13934
ENSMUSG00000028671	Gale	13.3636	ENSMUSG00000028327	Stra6l	6.01429	ENSMUSG00000028672	Hmgcl	2.61176	ENSMUSG00000024480	Ap3s1	2.81921	ENSMUSG00000032609	Klhdc8b	3.9949	ENSMUSG00000027204	Fbn1	4.39545
ENSMUSG00000028673	Fuca1	4.83713	ENSMUSG00000028337	Coro2a	3.11593	ENSMUSG00000028673	Fuca1	5.32934	ENSMUSG00000024481	Lvrn	23.8197	ENSMUSG00000032640	Chsy1	2.85452	ENSMUSG00000027208	Fgf7	3.68302
ENSMUSG00000028692	Akr1a1	2.00982	ENSMUSG00000028392	Bspry	3.82754	ENSMUSG00000028692	Akr1a1	2.12118	ENSMUSG00000024500	Ppp2r2b	9.81333	ENSMUSG00000032649	Colgalt2	12.5062	ENSMUSG00000027230	Creb3l1	5.84195
ENSMUSG00000028698	Pik3r3	2.73022	ENSMUSG00000028419	Chmp5	2.53401	ENSMUSG00000028698	Pik3r3	3.6045	ENSMUSG00000024511	Rab27b	26.2105	ENSMUSG00000032690	Oas2	49.4722	ENSMUSG00000027254	Map1a	2.99641
ENSMUSG00000028699	Tspan1	10.126	ENSMUSG00000028463	Car9	4.528	ENSMUSG00000028699	Tspan1	7.6748	ENSMUSG00000024529	Lox	6.34737	ENSMUSG00000032826	Ank2	2.33892	ENSMUSG00000027287	Snap23	2.04582
ENSMUSG00000028716	Pdzk1ip1	6.75105	ENSMUSG00000028468	Rgp1	2.12723	ENSMUSG00000028716	Pdzk1ip1	7.51055	ENSMUSG00000024538	Ppic	4.33409	ENSMUSG00000032925	Itgbl1	2.81379	ENSMUSG00000027346	Gpcpd1	2.05155
ENSMUSG00000028719	Cmpk1	3.27388	ENSMUSG00000028494	Plin2	2.37253	ENSMUSG00000028719	Cmpk1	2.95397	ENSMUSG00000024556	Me2	4.16418	ENSMUSG00000033082	Clec1a	3.93333	ENSMUSG00000027371	Fahd2a	6.375
ENSMUSG00000028751	Pla2g2e	76500	ENSMUSG00000028527	Ak4	5.35484	ENSMUSG00000028751	Pla2g2e	11900	ENSMUSG00000024598	Fbn2	7.85466	ENSMUSG00000033355	Rtp4	8.64626	ENSMUSG00000027399	Il1a	13.5
ENSMUSG00000028755	Cda	8.48649	ENSMUSG00000028536	2610528J11Rik	2.89535	ENSMUSG00000028755	Cda	9.75676	ENSMUSG00000024601	Isoc1	3.2887	ENSMUSG00000033379	Atp6v0b	2.07942	ENSMUSG00000027408	Cpxm1	6.31358
ENSMUSG00000028757	Ddost	2.26089	ENSMUSG00000028544	Slc5a9	20.2634	ENSMUSG00000028757	Ddost	2.38589	ENSMUSG00000024621	Csf1r	5.60156	ENSMUSG00000033420	Antxr1	2.20315	ENSMUSG00000027459	Fam110a	4.58491
ENSMUSG00000028766	Alpl	172.38	ENSMUSG00000028555	Ttc39a	2.69963	ENSMUSG00000028766	Alpl	208.06	ENSMUSG00000024640	Psat1	7.16629	ENSMUSG00000033453	Adamts15	6.33196	ENSMUSG00000027460	Angpt4	57.6667
ENSMUSG00000028843	Sh3bgrl3	2.81075	ENSMUSG00000028602	Tnfrsf8	79.2415	ENSMUSG00000028843	Sh3bgrl3	2.12617	ENSMUSG00000024646	Cyb5a	3.42857	ENSMUSG00000033488	BC026585	2.42857	ENSMUSG00000027488	Snta1	3.61379
ENSMUSG00000028883	Sema3a	2.9905	ENSMUSG00000028655	Mfsd2a	2.91127	ENSMUSG00000028909	Ptpru	2.27422	ENSMUSG00000024659	Anxa1	2.82039	ENSMUSG00000033569	Adgrb3	6.5	ENSMUSG00000027555	Car13	3.50773
ENSMUSG00000028927	Padi2	53.9779	ENSMUSG00000028664	Ephb2	2.47677	ENSMUSG00000028927	Padi2	73.0524	ENSMUSG00000024666	Tmem138	2.16981	ENSMUSG00000033578	Tmem35a	3.59574	ENSMUSG00000027593	Raly	4.05225
ENSMUSG00000028937	Acot7	2.47561	ENSMUSG00000028671	Gale	11.1091	ENSMUSG00000028961	Pgd	3.36006	ENSMUSG00000024691	Fam111a	3.9469	ENSMUSG00000033629	Hacd3	2.50093	ENSMUSG00000027596	a	4.603
ENSMUSG00000028961	Pgd	3.10821	ENSMUSG00000028673	Fuca1	5.14731	ENSMUSG00000028980	H6pd	5.95202	ENSMUSG00000024713	Pcsk5	5.6021	ENSMUSG00000033676	Gabrb3	3.86869	ENSMUSG00000027597	Ahcy	4.33748
ENSMUSG00000028980	H6pd	4.92172	ENSMUSG00000028692	Akr1a1	2.17139	ENSMUSG00000029038	Ssu72	2.75284	ENSMUSG00000024725	Ostf1	2.78061	ENSMUSG00000033684	Qsox1	2.48084	ENSMUSG00000027656	Wisp2	60
ENSMUSG00000029032	Arhgef16	2.40035	ENSMUSG00000028698	Pik3r3	2.42548	ENSMUSG00000029063	Nadk	3.20475	ENSMUSG00000024727	Trpm6	5.525	ENSMUSG00000033715	Akr1c14	17.8159	ENSMUSG00000027661	Slc2a10	4.26389
ENSMUSG00000029038	Ssu72	2.89038	ENSMUSG00000028699	Tspan1	9.94824	ENSMUSG00000029086	Prom1	5.18677	ENSMUSG00000024735	Prpf19	2.61408	ENSMUSG00000033809	Alg3	3.36667	ENSMUSG00000027663	Zmat3	3.95238
ENSMUSG00000029061	Mmp23	2.8	ENSMUSG00000028716	Pdzk1ip1	4.92827	ENSMUSG00000029102	Hgfac	64.1944	ENSMUSG00000024736	Tmem132a	5.48523	ENSMUSG00000033880	Lgals3bp	11.4364	ENSMUSG00000027742	Cog6	2.2678
ENSMUSG00000029063	Nadk	2.71416	ENSMUSG00000028719	Cmpk1	3.18527	ENSMUSG00000029119	Man2b2	3.15049	ENSMUSG00000024737	Slc15a3	2.95115	ENSMUSG00000033965	Slc16a2	2.64422	ENSMUSG00000027797	Dclk1	6.10424
ENSMUSG00000029086	Prom1	5.43853	ENSMUSG00000028751	Pla2g2e	61850	ENSMUSG00000029120	Ppp2r2c	14.0035	ENSMUSG00000024772	Ehd1	4.14347	ENSMUSG00000033981	Gria2	18.8	ENSMUSG00000027828	Ssr3	2.28387
ENSMUSG00000029102	Hgfac	39.4583	ENSMUSG00000028755	Cda	10.7297	ENSMUSG00000029175	Slc35f6	3.26161	ENSMUSG00000024776	Stambpl1	3.39882	ENSMUSG00000034040	Wbscr17	2.57267	ENSMUSG00000027848	Olfml3	8.18556
ENSMUSG00000029119	Man2b2	3.01477	ENSMUSG00000028757	Ddost	2.99669	ENSMUSG00000029189	Sel1l3	3.46974	ENSMUSG00000024777	Ppp2r5b	4.3625	ENSMUSG00000034117	Ptgdr2	4.64224	ENSMUSG00000027849	Syt6	4.56452
ENSMUSG00000029189	Sel1l3	3.96893	ENSMUSG00000028766	Alpl	133.15	ENSMUSG00000029304	Spp1	7.16871	ENSMUSG00000024781	Lipa	3.2883	ENSMUSG00000034205	Loxl2	6.85714	ENSMUSG00000027890	Gstm4	3.24
ENSMUSG00000029298	Gbp9	3.14795	ENSMUSG00000028837	Psmb2	2.64635	ENSMUSG00000029311	Hsd17b11	5.78744	ENSMUSG00000024854	Pold4	2.11382	ENSMUSG00000034371	Tkfc	2.44961	ENSMUSG00000027907	S100a11	2.23377
ENSMUSG00000029304	Spp1	26.8681	ENSMUSG00000028843	Sh3bgrl3	2.59579	ENSMUSG00000029322	Plac8	16.428	ENSMUSG00000024870	Rab1b	2.0563	ENSMUSG00000034435	Tmem30b	8.5	ENSMUSG00000027955	Fam198b	16.8059
ENSMUSG00000029311	Hsd17b11	4.26156	ENSMUSG00000028883	Sema3a	2.98575	ENSMUSG00000029385	Ccng2	4.12286	ENSMUSG00000024883	Rin1	2.88496	ENSMUSG00000034459	Ifit1	7.11602	ENSMUSG00000027962	Vcam1	34.0826
ENSMUSG00000029322	Plac8	26.1673	ENSMUSG00000028909	Ptpru	2.95061	ENSMUSG00000029413	Naaa	3.24766	ENSMUSG00000024885	Aldh3b1	4.74648	ENSMUSG00000034460	Six4	2.88235	ENSMUSG00000027963	Extl2	2.14501
ENSMUSG00000029377	Ereg	6.83505	ENSMUSG00000028927	Padi2	43.329	ENSMUSG00000029465	Arpc3	2.3326	ENSMUSG00000024892	Pcx	2.82199	ENSMUSG00000034612	Chst11	2.75048	ENSMUSG00000027983	Cyp2u1	5.45652
ENSMUSG00000029378	Areg	8.22677	ENSMUSG00000028961	Pgd	3.37531	ENSMUSG00000029602	Rasal1	2.25733	ENSMUSG00000024899	Papss2	4.52414	ENSMUSG00000034675	Dbn1	3.35258	ENSMUSG00000028003	Lrat	41.6835
ENSMUSG00000029379	Cxcl3	6.9901	ENSMUSG00000028980	H6pd	6.09007	ENSMUSG00000029672	Fam3c	7.14034	ENSMUSG00000024940	Ltbp3	2.46266	ENSMUSG00000034684	Sema3f	2.39269	ENSMUSG00000028007	Snx7	5.58416
ENSMUSG00000029380	Cxcl1	3.71485	ENSMUSG00000029032	Arhgef16	2.71213	ENSMUSG00000029713	Gnb2	2.0545	ENSMUSG00000024952	Rps6ka4	2.77717	ENSMUSG00000034687	Fras1	4.54292	ENSMUSG00000028037	Ifi44	3.70909
ENSMUSG00000029385	Ccng2	8.70678	ENSMUSG00000029038	Ssu72	2.7456	ENSMUSG00000029727	Cyp3a13	40.959	ENSMUSG00000024953	Prdx5	2.24977	ENSMUSG00000034708	Grn	3.33061	ENSMUSG00000028042	Zbtb7b	2.03218
ENSMUSG00000029413	Naaa	3.50703	ENSMUSG00000029063	Nadk	2.85663	ENSMUSG00000029759	Pon3	2.28018	ENSMUSG00000024958	Gpr137	4.42593	ENSMUSG00000034755	Pcdh11x	9.55844	ENSMUSG00000028047	Thbs3	2.02495
ENSMUSG00000029449	Rhof	9.50877	ENSMUSG00000029086	Prom1	5.87706	ENSMUSG00000029772	Ahcyl2	8.82316	ENSMUSG00000024968	Rcor2	3.34524	ENSMUSG00000034786	Gpsm3	3.36765	ENSMUSG00000028062	Lamtor2	2.67213
ENSMUSG00000029465	Arpc3	2.48297	ENSMUSG00000029102	Hgfac	31.3889	ENSMUSG00000029810	Tmem176b	4.10499	ENSMUSG00000024978	Gpam	10.5333	ENSMUSG00000034845	Plvap	3.25758	ENSMUSG00000028108	Ecm1	3.67781
ENSMUSG00000029561	Oasl2	6.09281	ENSMUSG00000029119	Man2b2	3.08579	ENSMUSG00000029811	Aoc1	4068.89	ENSMUSG00000024981	Acsl5	3.33959	ENSMUSG00000034880	Mrpl34	4.36508	ENSMUSG00000028111	Ctsk	8.1686
ENSMUSG00000029621	Arpc1a	2.23584	ENSMUSG00000029149	Krtcap3	2.65495	ENSMUSG00000029829	Tmem213	22.9065	ENSMUSG00000024997	Prdx3	2.8087	ENSMUSG00000034947	Tmem106a	3.72072	ENSMUSG00000028121	Bcar3	2.65144
ENSMUSG00000029622	Arpc1b	2.04195	ENSMUSG00000029175	Slc35f6	3.18093	ENSMUSG00000029847	Slc23a4	13.3774	ENSMUSG00000025007	Aldh18a1	2.14797	ENSMUSG00000035000	Dpp4	4.81595	ENSMUSG00000028132	Tmem56	3.71299
ENSMUSG00000029632	Ndufa4	2.25352	ENSMUSG00000029188	Slc34a2	2.34574	ENSMUSG00000029868	Trpv6	17.6321	ENSMUSG00000025027	Xpnpep1	3.15183	ENSMUSG00000035104	Eva1a	3.23711	ENSMUSG00000028159	Dapp1	3.07831
ENSMUSG00000029672	Fam3c	4.34821	ENSMUSG00000029189	Sel1l3	3.92983	ENSMUSG00000029878	Dbpht2	23.4832	ENSMUSG00000025089	Gfra1	17.6565	ENSMUSG00000035107	Dcbld2	2.94912	ENSMUSG00000028194	Ddah1	3.43011
ENSMUSG00000029713	Gnb2	2.08872	ENSMUSG00000029304	Spp1	46.7883	ENSMUSG00000029992	Gfpt1	2.25316	ENSMUSG00000025092	Hspa12a	4.29868	ENSMUSG00000035184	Fam124a	3.7188	ENSMUSG00000028197	Col24a1	5.92537
ENSMUSG00000029727	Cyp3a13	41.4585	ENSMUSG00000029311	Hsd17b11	2.92888	ENSMUSG00000030000	Add2	116.27	ENSMUSG00000025105	Bnc1	67.662	ENSMUSG00000035199	Arl6ip5	2.26245	ENSMUSG00000028199	Cryz	3.48851
ENSMUSG00000029772	Ahcyl2	7.95943	ENSMUSG00000029322	Plac8	35.1946	ENSMUSG00000030031	Kbtbd8	5.55	ENSMUSG00000025150	Cbr2	4.18519	ENSMUSG00000035212	Leprot	2.06061	ENSMUSG00000028328	Tmod1	3.43277
ENSMUSG00000029810	Tmem176b	2.70172	ENSMUSG00000029377	Ereg	4.51546	ENSMUSG00000030137	Tuba8	25.9655	ENSMUSG00000025170	Rab40b	3.37209	ENSMUSG00000035273	Hpse	4.04808	ENSMUSG00000028339	Col15a1	4.09263
ENSMUSG00000029811	Aoc1	2988.94	ENSMUSG00000029378	Areg	3.61338	ENSMUSG00000030228	Pik3c2g	15.6842	ENSMUSG00000025188	Hps1	2.91351	ENSMUSG00000035279	Ssc5d	6.89382	ENSMUSG00000028351	Brinp1	10950
ENSMUSG00000029826	Zc3hav1	2.18384	ENSMUSG00000029379	Cxcl3	4.27723	ENSMUSG00000030256	Bhlhe41	9.52964	ENSMUSG00000025190	Got1	2.76331	ENSMUSG00000035373	Ccl7	5.36789	ENSMUSG00000028358	Zfp618	2.94358
ENSMUSG00000029829	Tmem213	16.5252	ENSMUSG00000029380	Cxcl1	3.41196	ENSMUSG00000030263	Lrmp	12	ENSMUSG00000025203	Scd2	3.13631	ENSMUSG00000035385	Ccl2	3.76627	ENSMUSG00000028378	Ptgr1	2.23438
ENSMUSG00000029847	Slc23a4	17.5849	ENSMUSG00000029385	Ccng2	4.65928	ENSMUSG00000030268	Bcat1	7.91667	ENSMUSG00000025212	Sfxn3	3.24985	ENSMUSG00000035413	Tmem98	3.5137	ENSMUSG00000028393	Alad	5.69825
ENSMUSG00000029868	Trpv6	22.4458	ENSMUSG00000029413	Naaa	3.03984	ENSMUSG00000030413	Pglyrp1	90.2234	ENSMUSG00000025232	Hexa	2.39098	ENSMUSG00000035674	Ndufa3	2.53623	ENSMUSG00000028412	Slc44a1	2.71107
ENSMUSG00000029992	Gfpt1	2.65894	ENSMUSG00000029449	Rhof	5.2924	ENSMUSG00000030513	Pcsk6	12.1775	ENSMUSG00000025255	Zfhx4	7.53913	ENSMUSG00000035692	Isg15	3.78846	ENSMUSG00000028444	Cntfr	6.60606
ENSMUSG00000030000	Add2	202.973	ENSMUSG00000029465	Arpc3	2.45024	ENSMUSG00000030538	Cib1	5.98745	ENSMUSG00000025268	Maged2	2.22733	ENSMUSG00000035845	Alg12	2.74436	ENSMUSG00000028447	Dctn3	2.73077
ENSMUSG00000030031	Kbtbd8	5.6	ENSMUSG00000029561	Oasl2	11.7309	ENSMUSG00000030560	Ctsc	4.10486	ENSMUSG00000025277	Abhd6	3.44298	ENSMUSG00000035891	Cerk	2.11192	ENSMUSG00000028480	Glipr2	4.6129
ENSMUSG00000030107	Usp18	6.27368	ENSMUSG00000029622	Arpc1b	2.09961	ENSMUSG00000030650	Tmc5	5.87931	ENSMUSG00000025278	Flnb	2.9407	ENSMUSG00000035914	Cd276	2.99782	ENSMUSG00000028549	Itgb3bp	2.33171
ENSMUSG00000030110	Ret	13.0941	ENSMUSG00000029661	Col1a2	3.9356	ENSMUSG00000030682	Cdipt	2.3526	ENSMUSG00000025329	Padi1	15.9692	ENSMUSG00000035954	Dock4	3.09524	ENSMUSG00000028597	Gpx7	3.99444
ENSMUSG00000030137	Tuba8	18.0345	ENSMUSG00000029672	Fam3c	4.10041	ENSMUSG00000030695	Aldoa	2.19648	ENSMUSG00000025348	Itga7	4.34798	ENSMUSG00000036026	Tmem63b	2.12034	ENSMUSG00000028599	Tnfrsf1b	4.29977
ENSMUSG00000030162	Olr1	3.26908	ENSMUSG00000029713	Gnb2	2.33777	ENSMUSG00000030739	Myh14	3.62346	ENSMUSG00000025371	Chmp6	2.3913	ENSMUSG00000036036	Zfp57	3.13189	ENSMUSG00000028641	P3h1	2.53453
ENSMUSG00000030256	Bhlhe41	3.4585	ENSMUSG00000029727	Cyp3a13	21.6783	ENSMUSG00000030747	Dgat2	4.14447	ENSMUSG00000025381	Cnpy2	3.34495	ENSMUSG00000036040	Adamtsl2	3.76316	ENSMUSG00000028673	Fuca1	3.52789
ENSMUSG00000030263	Lrmp	36.1667	ENSMUSG00000029762	Akr1b8	4.83673	ENSMUSG00000030757	Zkscan2	6.08772	ENSMUSG00000025465	Echs1	3.10423	ENSMUSG00000036098	Myrf	5.11818	ENSMUSG00000028719	Cmpk1	3.93643
ENSMUSG00000030268	Bcat1	6.4822	ENSMUSG00000029772	Ahcyl2	8.61442	ENSMUSG00000030760	Acer3	2.10601	ENSMUSG00000025466	Fuom	8.07407	ENSMUSG00000036295	Lrrn3	3.29487	ENSMUSG00000028763	Hspg2	2.51552
ENSMUSG00000030282	Cmas	2.06809	ENSMUSG00000029810	Tmem176b	3.36863	ENSMUSG00000030762	Aqp8	18.6667	ENSMUSG00000025467	Prap1	130.444	ENSMUSG00000036334	Igsf10	3.13073	ENSMUSG00000028766	Alpl	17.4247
ENSMUSG00000030353	Tead4	3.03761	ENSMUSG00000029811	Aoc1	3032.81	ENSMUSG00000030786	Itgam	152.873	ENSMUSG00000025487	Psmd13	2.63768	ENSMUSG00000036356	Csgalnact1	2.84722	ENSMUSG00000028804	Csmd2	94.4167
ENSMUSG00000030413	Pglyrp1	86.7128	ENSMUSG00000029826	Zc3hav1	2.25079	ENSMUSG00000030811	Fbxl19	2.37439	ENSMUSG00000025503	Taldo1	4.18458	ENSMUSG00000036372	Tmem258	2.55497	ENSMUSG00000028836	Slc30a2	73.7518
ENSMUSG00000030494	Rhpn2	2.73532	ENSMUSG00000029829	Tmem213	15.8417	ENSMUSG00000030824	Nucb1	6.43556	ENSMUSG00000025504	Eps8l2	7.80597	ENSMUSG00000036381	P2ry14	13.5579	ENSMUSG00000028843	Sh3bgrl3	2.74654
ENSMUSG00000030513	Pcsk6	13.4186	ENSMUSG00000029847	Slc23a4	17	ENSMUSG00000030854	Ptpn5	4.77143	ENSMUSG00000025510	Cd151	3.81941	ENSMUSG00000036402	Gng12	2.51963	ENSMUSG00000028871	Rspo1	4.30737
ENSMUSG00000030530	Furin	2.23593	ENSMUSG00000029868	Trpv6	24.533	ENSMUSG00000030986	Dhx32	4.1956	ENSMUSG00000025521	Tmem192	2	ENSMUSG00000036412	Arsi	8.78814	ENSMUSG00000028883	Sema3a	2.65544
ENSMUSG00000030538	Cib1	5.67364	ENSMUSG00000029992	Gfpt1	2.72558	ENSMUSG00000031021	Tmem9b	3.58085	ENSMUSG00000025534	Gusb	3.13775	ENSMUSG00000036446	Lum	2.62719	ENSMUSG00000028927	Padi2	62.5
ENSMUSG00000030560	Ctsc	3.37625	ENSMUSG00000030000	Add2	202.243	ENSMUSG00000031097	Tnni2	7.6	ENSMUSG00000025555	Farp1	2.67219	ENSMUSG00000036523	Greb1	4.47774	ENSMUSG00000028949	Smarcd3	2.13742
ENSMUSG00000030650	Tmc5	6.41379	ENSMUSG00000030029	Lrig1	3.24845	ENSMUSG00000031098	Syt8	21.6296	ENSMUSG00000025572	Tmc6	3.06591	ENSMUSG00000036534	Slc38a7	2.44944	ENSMUSG00000028961	Pgd	3.28247
ENSMUSG00000030682	Cdipt	2.09711	ENSMUSG00000030107	Usp18	8.25263	ENSMUSG00000031168	Ebp	2.6214	ENSMUSG00000025647	Shisa5	2.42527	ENSMUSG00000036545	Adamts2	14.779	ENSMUSG00000028973	Abcb8	3.16854
ENSMUSG00000030695	Aldoa	2.70442	ENSMUSG00000030110	Ret	9.68706	ENSMUSG00000031284	Pak3	3.34226	ENSMUSG00000025735	Rhbdl1	3.04639	ENSMUSG00000036564	Ndrg4	2.19583	ENSMUSG00000028980	H6pd	2.71327
ENSMUSG00000030717	Nupr1	2.7156	ENSMUSG00000030111	A2m	30.5333	ENSMUSG00000031298	Adgrg2	3.12828	ENSMUSG00000025742	Prps2	6.38638	ENSMUSG00000036565	Ttyh3	3.05126	ENSMUSG00000029005	Draxin	10.5437
ENSMUSG00000030739	Myh14	3.01799	ENSMUSG00000030137	Tuba8	13.8276	ENSMUSG00000031349	Nsdhl	2.42905	ENSMUSG00000025762	Larp1b	2.7494	ENSMUSG00000036596	Cpz	83.6333	ENSMUSG00000029061	Mmp23	3.86641
ENSMUSG00000030747	Dgat2	3.73326	ENSMUSG00000030223	Ptpro	3.78351	ENSMUSG00000031353	Rbbp7	2.08501	ENSMUSG00000025779	Ly96	2.49655	ENSMUSG00000036751	Cox6b1	2.02247	ENSMUSG00000029063	Nadk	2.1465
ENSMUSG00000030760	Acer3	3.09347	ENSMUSG00000030256	Bhlhe41	2.9249	ENSMUSG00000031372	Trex2	21.8158	ENSMUSG00000025781	Atp5c1	2.19443	ENSMUSG00000036777	Anln	3.42424	ENSMUSG00000029070	Mxra8	2.69046
ENSMUSG00000030786	Itgam	148.291	ENSMUSG00000030263	Lrmp	32.25	ENSMUSG00000031373	Car5b	5.52907	ENSMUSG00000025790	Slco3a1	2.69452	ENSMUSG00000036908	Unc93b1	3.76375	ENSMUSG00000029082	Bst1	21.0714
ENSMUSG00000030792	Dkkl1	3.20536	ENSMUSG00000030268	Bcat1	6.51953	ENSMUSG00000031374	Zfp92	5.02326	ENSMUSG00000025791	Pgm2	4.93831	ENSMUSG00000037005	Xpnpep2	6.13402	ENSMUSG00000029096	Htra3	4.51289
ENSMUSG00000030811	Fbxl19	2.4684	ENSMUSG00000030353	Tead4	2.34359	ENSMUSG00000031400	G6pdx	6.31434	ENSMUSG00000025810	Nrp1	4.16263	ENSMUSG00000037020	Wdr62	3.36264	ENSMUSG00000029119	Man2b2	2.29958
ENSMUSG00000030824	Nucb1	4.32873	ENSMUSG00000030413	Pglyrp1	73.4149	ENSMUSG00000031429	Psmd10	2.42941	ENSMUSG00000025823	Pdia4	2.0966	ENSMUSG00000037035	Inhbb	20.6168	ENSMUSG00000029126	Nsg1	2.53354
ENSMUSG00000030873	Scnn1b	3.16505	ENSMUSG00000030494	Rhpn2	2.27398	ENSMUSG00000031438	Rnf128	3.4707	ENSMUSG00000025867	Cplx2	4.15469	ENSMUSG00000037049	Smpd1	2.59705	ENSMUSG00000029156	Sgcb	2.21408
ENSMUSG00000030921	Trim30a	2.78443	ENSMUSG00000030513	Pcsk6	8.57396	ENSMUSG00000031483	Erlin2	2.1781	ENSMUSG00000025868	Higd2a	2.6881	ENSMUSG00000037151	Lrrc20	2.37692	ENSMUSG00000029163	Emilin1	3.31825
ENSMUSG00000030986	Dhx32	4.67802	ENSMUSG00000030538	Cib1	6.09623	ENSMUSG00000031521	Aga	2.75419	ENSMUSG00000025875	Tspan17	4.66265	ENSMUSG00000037225	Fgf2	2.08851	ENSMUSG00000029185	Fam114a1	2.29605
ENSMUSG00000031021	Tmem9b	2.82553	ENSMUSG00000030560	Ctsc	3.92059	ENSMUSG00000031557	Plekha2	4.02824	ENSMUSG00000025885	Myo5b	80.0488	ENSMUSG00000037306	Man1c1	2.58669	ENSMUSG00000029233	Srd5a3	2.88328
ENSMUSG00000031089	Slc6a14	5.7079	ENSMUSG00000030591	Psmd8	2.19877	ENSMUSG00000031584	Gsr	2.57446	ENSMUSG00000025903	Lypla1	2.79587	ENSMUSG00000037366	Pafah2	2.4129	ENSMUSG00000029377	Ereg	85.3125
ENSMUSG00000031097	Tnni2	18.5333	ENSMUSG00000030650	Tmc5	13.7931	ENSMUSG00000031639	Tlr3	3.78371	ENSMUSG00000025937	Lactb2	2.02872	ENSMUSG00000037379	Spon2	8.55214	ENSMUSG00000029379	Cxcl3	19950
ENSMUSG00000031098	Syt8	72.3333	ENSMUSG00000030695	Aldoa	2.44944	ENSMUSG00000031641	Cbr4	3.11736	ENSMUSG00000025938	Slco5a1	4.45809	ENSMUSG00000037440	Vnn1	2.67143	ENSMUSG00000029380	Cxcl1	3.84667
ENSMUSG00000031146	Plp2	2.51726	ENSMUSG00000030717	Nupr1	3.32416	ENSMUSG00000031647	Mfap3l	3.76894	ENSMUSG00000025950	Idh1	13.3211	ENSMUSG00000037613	Tnfrsf23	4.51887	ENSMUSG00000029413	Naaa	2.05263
ENSMUSG00000031168	Ebp	2.4321	ENSMUSG00000030739	Myh14	2.42235	ENSMUSG00000031667	Aktip	3.01523	ENSMUSG00000025955	Akr1cl	94.015	ENSMUSG00000037624	Kcnk2	7.64401	ENSMUSG00000029426	Scarb2	2.54738
ENSMUSG00000031217	Efnb1	2.11261	ENSMUSG00000030747	Dgat2	2.99338	ENSMUSG00000031722	Hp	25.8974	ENSMUSG00000026029	Casp8	3.88725	ENSMUSG00000037685	Atp8a1	2.35927	ENSMUSG00000029428	Stx2	2.29485
ENSMUSG00000031362	Xlr4c	61.2774	ENSMUSG00000030748	Il4ra	3.20335	ENSMUSG00000031723	Txnl4b	4.22727	ENSMUSG00000026032	Ndufb3	2.61905	ENSMUSG00000037686	Aspg	6.07737	ENSMUSG00000029436	Mmp17	3.72082
ENSMUSG00000031372	Trex2	17.2105	ENSMUSG00000030760	Acer3	2.90339	ENSMUSG00000031734	Irx3	5.29412	ENSMUSG00000026042	Col5a2	4.71192	ENSMUSG00000037710	Cisd1	2.58333	ENSMUSG00000029484	Anxa3	16.5236
ENSMUSG00000031373	Car5b	8.06686	ENSMUSG00000030786	Itgam	128.873	ENSMUSG00000031788	Kifc3	3.01303	ENSMUSG00000026043	Col3a1	6.31824	ENSMUSG00000037816	Fbxw17	3.79668	ENSMUSG00000029510	Gpc2	2.56853
ENSMUSG00000031374	Zfp92	7.2093	ENSMUSG00000030792	Dkkl1	2.76786	ENSMUSG00000031803	B3gnt3	7.94304	ENSMUSG00000026047	Kdelc1	2.28264	ENSMUSG00000038074	Fkbp14	2.87801	ENSMUSG00000029545	Acads	2.37829
ENSMUSG00000031400	G6pdx	4.36397	ENSMUSG00000030824	Nucb1	3.68411	ENSMUSG00000031813	Mvb12a	2.23642	ENSMUSG00000026069	Il1rl1	109	ENSMUSG00000038156	Spon1	8.03733	ENSMUSG00000029598	Plbd2	4.31995
ENSMUSG00000031429	Psmd10	2.32941	ENSMUSG00000030854	Ptpn5	3.21429	ENSMUSG00000031824	6430548M08Rik	2.64416	ENSMUSG00000026070	Il18r1	15.913	ENSMUSG00000038178	Slc43a2	6.43333	ENSMUSG00000029632	Ndufa4	3.85539
ENSMUSG00000031438	Rnf128	4.08228	ENSMUSG00000030873	Scnn1b	4.36893	ENSMUSG00000031827	Cotl1	2.32771	ENSMUSG00000026088	Mitd1	3.06962	ENSMUSG00000038217	Tlcd2	2.27778	ENSMUSG00000029661	Col1a2	14.2859
ENSMUSG00000031521	Aga	2.19553	ENSMUSG00000030921	Trim30a	4.34132	ENSMUSG00000031842	Pde4c	3.19946	ENSMUSG00000026090	2010300C02Rik	28.2576	ENSMUSG00000038239	Hrc	5.77778	ENSMUSG00000029674	Limk1	2.53261
ENSMUSG00000031530	Dusp4	2.87668	ENSMUSG00000030986	Dhx32	3.93077	ENSMUSG00000031844	Hsd17b2	42.8947	ENSMUSG00000026109	Tmeff2	14.701	ENSMUSG00000038311	2410017I17Rik	6.86207	ENSMUSG00000029675	Eln	10.2376
ENSMUSG00000031557	Plekha2	3.50064	ENSMUSG00000031021	Tmem9b	2.89574	ENSMUSG00000031887	Tradd	2.88827	ENSMUSG00000026123	Plekhb2	3.22017	ENSMUSG00000038312	Edem2	2.32673	ENSMUSG00000029718	Pcolce	10.6897
ENSMUSG00000031558	Slit2	2.75642	ENSMUSG00000031089	Slc6a14	5.41451	ENSMUSG00000031903	Pla2g15	6.72464	ENSMUSG00000026154	Sdhaf4	5.73333	ENSMUSG00000038352	Arl5c	2.95652	ENSMUSG00000029759	Pon3	4.86792
ENSMUSG00000031584	Gsr	2.23645	ENSMUSG00000031097	Tnni2	14.4	ENSMUSG00000031906	Smpd3	62.9576	ENSMUSG00000026155	Smap1	2.52834	ENSMUSG00000038375	Trp53inp2	3.68633	ENSMUSG00000029765	Plxna4	18.1991
ENSMUSG00000031635	Anxa10	77.5561	ENSMUSG00000031098	Syt8	52.6111	ENSMUSG00000031918	Mtmr2	2.63745	ENSMUSG00000026156	B3gat2	2.44808	ENSMUSG00000038400	Pmepa1	4.79257	ENSMUSG00000029810	Tmem176b	4.83708
ENSMUSG00000031639	Tlr3	2.77247	ENSMUSG00000031145	Prickle3	2.08399	ENSMUSG00000031987	Egln1	3.05236	ENSMUSG00000026177	Slc11a1	3.66667	ENSMUSG00000038453	Srcin1	5.06977	ENSMUSG00000029811	Aoc1	197.062
ENSMUSG00000031641	Cbr4	4.59339	ENSMUSG00000031146	Plp2	2.60951	ENSMUSG00000032062	2310030G06Rik	3.45876	ENSMUSG00000026193	Fn1	2.85256	ENSMUSG00000038457	Tmem255b	2.94262	ENSMUSG00000029878	Dbpht2	5.17593
ENSMUSG00000031647	Mfap3l	2.70076	ENSMUSG00000031168	Ebp	2.79012	ENSMUSG00000032068	Plet1	5.7686	ENSMUSG00000026200	Glb1l	2.60488	ENSMUSG00000038530	Rgs4	3.79053	ENSMUSG00000030069	Prok2	10.2667
ENSMUSG00000031652	N4bp1	2.01256	ENSMUSG00000031217	Efnb1	2.31081	ENSMUSG00000032091	Tmprss4	11.43	ENSMUSG00000026222	Sp100	3.32879	ENSMUSG00000038725	Pkhd1l1	3.60177	ENSMUSG00000030089	Slc41a3	2.39608
ENSMUSG00000031734	Irx3	7.30882	ENSMUSG00000031257	Nox1	2.35088	ENSMUSG00000032092	Mpzl2	2.34067	ENSMUSG00000026241	Nppc	16.6709	ENSMUSG00000038776	Ephx1	2.64291	ENSMUSG00000030111	A2m	62.8348
ENSMUSG00000031803	B3gnt3	11.6835	ENSMUSG00000031349	Nsdhl	2.8277	ENSMUSG00000032109	Nlrx1	5.39881	ENSMUSG00000026247	Ecel1	28.2222	ENSMUSG00000038859	Baiap2l1	2.61505	ENSMUSG00000030162	Olr1	78.84
ENSMUSG00000031844	Hsd17b2	51.0526	ENSMUSG00000031353	Rbbp7	2.17967	ENSMUSG00000032120	C2cd2l	3.31694	ENSMUSG00000026303	Mlph	11.4333	ENSMUSG00000039004	Bmp6	5.38889	ENSMUSG00000030170	Wnt5b	2.76453
ENSMUSG00000031887	Tradd	2.7095	ENSMUSG00000031367	Ap1s2	6.64355	ENSMUSG00000032123	Dpagt1	2.65578	ENSMUSG00000026315	Serpinb8	5.4898	ENSMUSG00000039007	Cpq	2.66967	ENSMUSG00000030209	Grin2b	5.37931
ENSMUSG00000031903	Pla2g15	5.21739	ENSMUSG00000031373	Car5b	7.43605	ENSMUSG00000032261	Sh3bgrl2	5.10931	ENSMUSG00000026317	Cln8	2.03268	ENSMUSG00000039031	Arhgap18	2.9251	ENSMUSG00000030220	Arhgdib	11.7241
ENSMUSG00000031906	Smpd3	31.8136	ENSMUSG00000031400	G6pdx	4.42157	ENSMUSG00000032265	Fam46a	6.96738	ENSMUSG00000026321	Tnfrsf11a	2.26042	ENSMUSG00000039058	Ak5	7.63333	ENSMUSG00000030222	Rerg	4.80493
ENSMUSG00000031937	Vstm5	13.7368	ENSMUSG00000031438	Rnf128	4.07524	ENSMUSG00000032306	Mpi	4.25439	ENSMUSG00000026343	Gpr39	16.6667	ENSMUSG00000039246	Lyplal1	2.48	ENSMUSG00000030254	Rad18	2.95041
ENSMUSG00000031987	Egln1	2.96073	ENSMUSG00000031521	Aga	2.20112	ENSMUSG00000032313	Tmem266	4.30303	ENSMUSG00000026344	Lypd1	10.9767	ENSMUSG00000039252	Lgi2	4.91852	ENSMUSG00000030465	Psd3	2.65958
ENSMUSG00000031995	St14	2.58386	ENSMUSG00000031557	Plekha2	3.83825	ENSMUSG00000032349	Elovl5	2.66052	ENSMUSG00000026395	Ptprc	17.1429	ENSMUSG00000039254	Pomt1	3.76596	ENSMUSG00000030513	Pcsk6	3.47222
ENSMUSG00000032068	Plet1	6.08422	ENSMUSG00000031558	Slit2	2.75642	ENSMUSG00000032353	Tmed3	3.7137	ENSMUSG00000026417	Pigr	9.07059	ENSMUSG00000039357	Fut11	2.48	ENSMUSG00000030538	Cib1	3.17143
ENSMUSG00000032091	Tmprss4	18.0489	ENSMUSG00000031584	Gsr	3.45093	ENSMUSG00000032359	Ctsh	2.57372	ENSMUSG00000026435	Slc45a3	3.90625	ENSMUSG00000039405	Prss23	8.44469	ENSMUSG00000030560	Ctsc	3.67403
ENSMUSG00000032109	Nlrx1	3.81548	ENSMUSG00000031608	Galnt7	2.43894	ENSMUSG00000032373	Car12	14.9496	ENSMUSG00000026442	Nfasc	2.15464	ENSMUSG00000039452	Snx22	2.24848	ENSMUSG00000030591	Psmd8	2.25947
ENSMUSG00000032120	C2cd2l	2.29144	ENSMUSG00000031628	Casp3	2.38843	ENSMUSG00000032381	Fam96a	2.85894	ENSMUSG00000026478	Lamc1	2.22598	ENSMUSG00000039481	Nrtn	3.64286	ENSMUSG00000030600	Lrfn1	2.92079
ENSMUSG00000032123	Dpagt1	2.31407	ENSMUSG00000031634	Ufsp2	2.27628	ENSMUSG00000032412	Atp1b3	2.9947	ENSMUSG00000026479	Lamc2	2.25765	ENSMUSG00000039497	Dse	2.10087	ENSMUSG00000030605	Mfge8	3.62013
ENSMUSG00000032226	Gcnt3	2.41655	ENSMUSG00000031635	Anxa10	114.464	ENSMUSG00000032418	Me1	2.28401	ENSMUSG00000026480	Ncf2	4.25581	ENSMUSG00000039621	Prex1	3.44614	ENSMUSG00000030607	Acan	5.88571
ENSMUSG00000032231	Anxa2	3.00997	ENSMUSG00000031637	Lrp2bp	4.04167	ENSMUSG00000032456	Nmnat3	3.16316	ENSMUSG00000026494	Kif26b	3.95368	ENSMUSG00000039683	Sdk1	5.76949	ENSMUSG00000030621	Me3	6.71501
ENSMUSG00000032261	Sh3bgrl2	4.17398	ENSMUSG00000031639	Tlr3	3.56742	ENSMUSG00000032496	Ltf	27.2858	ENSMUSG00000026502	Desi2	2.40335	ENSMUSG00000039787	Cercam	5.23404	ENSMUSG00000030623	Prss23os	13.1181
ENSMUSG00000032265	Fam46a	8.13191	ENSMUSG00000031641	Cbr4	3.38678	ENSMUSG00000032528	Vipr1	9.12381	ENSMUSG00000026526	Fh1	2.12444	ENSMUSG00000039798	2600006K01Rik	5.49153	ENSMUSG00000030630	Fah	3.19661
ENSMUSG00000032278	Paqr5	4	ENSMUSG00000031652	N4bp1	2.37426	ENSMUSG00000032584	Mst1r	9.84302	ENSMUSG00000026532	Spta1	40.125	ENSMUSG00000040026	Saa3	34.9501	ENSMUSG00000030647	Ndufc2	2.23276
ENSMUSG00000032294	Pkm	2.55449	ENSMUSG00000031667	Aktip	2.67174	ENSMUSG00000032612	Usp4	2.44291	ENSMUSG00000026536	Ifi211	2.74132	ENSMUSG00000040280	Ndufa4l2	5.23944	ENSMUSG00000030682	Cdipt	2.04587
ENSMUSG00000032312	Csk	2.21304	ENSMUSG00000031734	Irx3	5.45588	ENSMUSG00000032661	Oas3	15.9167	ENSMUSG00000026575	Nme7	2.47706	ENSMUSG00000040296	Ddx58	3.14081	ENSMUSG00000030688	Stard10	2.65163
ENSMUSG00000032313	Tmem266	3.63636	ENSMUSG00000031803	B3gnt3	12.7089	ENSMUSG00000032690	Oas2	3.95719	ENSMUSG00000026576	Atp1b1	4.69011	ENSMUSG00000040447	Spns2	3.375	ENSMUSG00000030717	Nupr1	3.5229
ENSMUSG00000032353	Tmed3	3.23926	ENSMUSG00000031824	6430548M08Rik	3.17922	ENSMUSG00000032718	Mansc1	4.67181	ENSMUSG00000026579	F5	7.95745	ENSMUSG00000040483	Xaf1	4.97129	ENSMUSG00000030727	Rabep2	2.54196
ENSMUSG00000032359	Ctsh	2.52082	ENSMUSG00000031844	Hsd17b2	48.1579	ENSMUSG00000032726	Bmp8a	13.1683	ENSMUSG00000026605	Cenpf	11.7097	ENSMUSG00000040540	Gm9770	3.17333	ENSMUSG00000030739	Myh14	7.50224
ENSMUSG00000032373	Car12	14.4273	ENSMUSG00000031887	Tradd	2.29609	ENSMUSG00000032735	Ablim3	2.57292	ENSMUSG00000026676	Ccdc3	9.29474	ENSMUSG00000040569	Slc26a7	15.6703	ENSMUSG00000030748	Il4ra	2.52004
ENSMUSG00000032381	Fam96a	3.08816	ENSMUSG00000031891	Hsd11b2	5.0597	ENSMUSG00000032758	Kap	459150	ENSMUSG00000026688	Mgst3	2.73718	ENSMUSG00000040605	Bace2	7.48113	ENSMUSG00000030780	BC017158	2.73653
ENSMUSG00000032412	Atp1b3	2.58824	ENSMUSG00000031897	Psmb10	2.31165	ENSMUSG00000032812	Arap1	2.88145	ENSMUSG00000026728	Vim	2.74385	ENSMUSG00000040722	Scamp5	2.48031	ENSMUSG00000030786	Itgam	11.9583
ENSMUSG00000032418	Me1	2.29833	ENSMUSG00000031906	Smpd3	35.4492	ENSMUSG00000032860	P2ry2	3.03977	ENSMUSG00000026767	Fam188a	4.00397	ENSMUSG00000040808	S100g	13.6538	ENSMUSG00000030824	Nucb1	3.08175
ENSMUSG00000032456	Nmnat3	2.34737	ENSMUSG00000031987	Egln1	2.6716	ENSMUSG00000032883	Acsl3	2.41699	ENSMUSG00000026768	Itga8	3.50729	ENSMUSG00000040829	Zmynd15	13.7689	ENSMUSG00000030844	Rgs10	3.44
ENSMUSG00000032496	Ltf	26.5584	ENSMUSG00000031995	St14	2.45178	ENSMUSG00000033088	Triobp	2.68758	ENSMUSG00000026773	Pfkfb3	3.83395	ENSMUSG00000041037	Irgq	2.29145	ENSMUSG00000030854	Ptpn5	27.5122
ENSMUSG00000032584	Mst1r	10.0174	ENSMUSG00000032059	Alg9	2.08356	ENSMUSG00000033124	Atg9a	3.56539	ENSMUSG00000026779	Mastl	4.6213	ENSMUSG00000041046	Ramp3	15.8268	ENSMUSG00000030872	Gga2	2.65728
ENSMUSG00000032661	Oas3	80.4583	ENSMUSG00000032062	2310030G06Rik	2.65979	ENSMUSG00000033170	Card10	5.23497	ENSMUSG00000026786	Apbb1ip	2.62259	ENSMUSG00000041540	Sox5	2.23656	ENSMUSG00000030894	Tpp1	2.19027
ENSMUSG00000032690	Oas2	15.8226	ENSMUSG00000032068	Plet1	5.40346	ENSMUSG00000033307	Mif	2.30553	ENSMUSG00000026817	Ak1	15.3012	ENSMUSG00000041654	Slc39a11	3.55556	ENSMUSG00000030930	Chst15	2.25806
ENSMUSG00000032718	Mansc1	2.90749	ENSMUSG00000032091	Tmprss4	18.3844	ENSMUSG00000033318	Gstt2	2.9529	ENSMUSG00000026822	Lcn2	15.6911	ENSMUSG00000041696	Rasl12	2.88797	ENSMUSG00000030986	Dhx32	3.18361
ENSMUSG00000032726	Bmp8a	10.2475	ENSMUSG00000032109	Nlrx1	4.6131	ENSMUSG00000033335	Dnm2	2.39008	ENSMUSG00000026828	Galnt5	11.95	ENSMUSG00000041729	Coro2b	3.56831	ENSMUSG00000031070	Mrgprf	3.395
ENSMUSG00000032758	Kap	1169150	ENSMUSG00000032123	Dpagt1	3.01256	ENSMUSG00000033498	Strc	14.6471	ENSMUSG00000026829	Gbgt1	3.79675	ENSMUSG00000041757	Plekha6	4.77515	ENSMUSG00000031103	Elf4	2.71418
ENSMUSG00000032812	Arap1	2.42882	ENSMUSG00000032226	Gcnt3	2.418	ENSMUSG00000033589	Reep4	2.64737	ENSMUSG00000026832	Cytip	11.25	ENSMUSG00000041779	Tram2	2.23874	ENSMUSG00000031129	Slc9a9	8.70213
ENSMUSG00000032883	Acsl3	2.64973	ENSMUSG00000032231	Anxa2	2.71098	ENSMUSG00000033628	Pik3c3	6.08569	ENSMUSG00000026837	Col5a1	4.65619	ENSMUSG00000041794	Myrip	15.1368	ENSMUSG00000031146	Plp2	2.26489
ENSMUSG00000033020	Polr2f	2.3125	ENSMUSG00000032261	Sh3bgrl2	4.08468	ENSMUSG00000033684	Qsox1	4.76276	ENSMUSG00000026895	Ndufa8	3.53846	ENSMUSG00000041845	Rhod	3.04808	ENSMUSG00000031149	Praf2	3.02828
ENSMUSG00000033088	Triobp	2.61876	ENSMUSG00000032265	Fam46a	11.4908	ENSMUSG00000033809	Alg3	3.82292	ENSMUSG00000026914	Psmd14	2.06066	ENSMUSG00000041889	Shisa4	3.52344	ENSMUSG00000031158	Timm17b	2.16402
ENSMUSG00000033106	Slc7a6os	2.57413	ENSMUSG00000032278	Paqr5	3.29288	ENSMUSG00000033880	Lgals3bp	4.93211	ENSMUSG00000026966	Ssna1	3.18182	ENSMUSG00000041895	Wipi1	3.30065	ENSMUSG00000031170	Slc38a5	21.8689
ENSMUSG00000033124	Atg9a	2.67768	ENSMUSG00000032294	Pkm	2.49661	ENSMUSG00000034112	Atp2c2	99.5882	ENSMUSG00000026980	Ly75	3.37705	ENSMUSG00000041936	Agrn	2.90688	ENSMUSG00000031209	Heph	6.28682
ENSMUSG00000033170	Card10	8.48998	ENSMUSG00000032300	1700017B05Rik	2.53921	ENSMUSG00000034116	Vav1	5.2	ENSMUSG00000026981	Il1rn	45.7778	ENSMUSG00000041958	Pigs	2.34375	ENSMUSG00000031239	Itm2a	8.96374
ENSMUSG00000033307	Mif	3.23253	ENSMUSG00000032306	Mpi	2.58772	ENSMUSG00000034157	Cipc	2.30226	ENSMUSG00000027004	Frzb	3.58543	ENSMUSG00000042190	Cmklr1	14.1083	ENSMUSG00000031253	Srpx2	11.5455
ENSMUSG00000033318	Gstt2	3.4529	ENSMUSG00000032312	Csk	2.2337	ENSMUSG00000034247	Plekhm1	2.83572	ENSMUSG00000027009	Itga4	5.00292	ENSMUSG00000042254	Cilp	5.42044	ENSMUSG00000031284	Pak3	7.25105
ENSMUSG00000033355	Rtp4	5.16477	ENSMUSG00000032353	Tmed3	3.63599	ENSMUSG00000034254	Agpat1	2.70508	ENSMUSG00000027010	Slc25a12	3.77417	ENSMUSG00000042289	Hsd3b7	2.59124	ENSMUSG00000031289	Il13ra2	4.66071
ENSMUSG00000033379	Atp6v0b	2.197	ENSMUSG00000032359	Ctsh	2.40416	ENSMUSG00000034255	Arhgap27	6.03638	ENSMUSG00000027012	Dync1i2	2.19771	ENSMUSG00000042331	Specc1	4.66467	ENSMUSG00000031342	Gpm6b	5.187
ENSMUSG00000033498	Strc	15.0588	ENSMUSG00000032373	Car12	15.2184	ENSMUSG00000034265	Zdhhc14	3.22222	ENSMUSG00000027015	Cybrd1	19.9315	ENSMUSG00000042349	Ikbke	3.41624	ENSMUSG00000031380	Vegfd	7.66332
ENSMUSG00000033628	Pik3c3	5.72036	ENSMUSG00000032381	Fam96a	3.09068	ENSMUSG00000034271	Jdp2	3.89744	ENSMUSG00000027016	Zfp385b	2.77154	ENSMUSG00000042401	Crtac1	152.471	ENSMUSG00000031400	G6pdx	2.91749
ENSMUSG00000033684	Qsox1	6.80556	ENSMUSG00000032412	Atp1b3	2.42475	ENSMUSG00000034308	Sdr42e1	3	ENSMUSG00000027030	Stk39	2.44226	ENSMUSG00000042436	Mfap4	4.41412	ENSMUSG00000031429	Psmd10	4.08475
ENSMUSG00000033809	Alg3	2.78125	ENSMUSG00000032456	Nmnat3	2.45263	ENSMUSG00000034394	Lif	5.34259	ENSMUSG00000027068	Dhrs9	96.9583	ENSMUSG00000042793	Lgr6	16.0703	ENSMUSG00000031451	Gas6	8.43453
ENSMUSG00000033880	Lgals3bp	9.72629	ENSMUSG00000032487	Ptgs2	4.89968	ENSMUSG00000034435	Tmem30b	3.37001	ENSMUSG00000027070	Lrp2	31.5422	ENSMUSG00000042804	Gpr153	5.0685	ENSMUSG00000031502	Col4a1	4.48124
ENSMUSG00000033898	Cfhr2	4.88235	ENSMUSG00000032496	Ltf	24.2233	ENSMUSG00000034445	Cyb561a3	2.22596	ENSMUSG00000027078	Ube2l6	3.04598	ENSMUSG00000042842	Serpinb6b	7.03012	ENSMUSG00000031503	Col4a2	4.80598
ENSMUSG00000033906	Zdhhc15	2.55978	ENSMUSG00000032549	Rab6b	3.47445	ENSMUSG00000034471	Caskin2	2.89426	ENSMUSG00000027099	Mtx2	2.31006	ENSMUSG00000042978	Sbk1	2.75681	ENSMUSG00000031517	Gpm6a	22.0064
ENSMUSG00000034112	Atp2c2	121.49	ENSMUSG00000032572	Col6a4	8.26896	ENSMUSG00000034607	Pof1b	2.46858	ENSMUSG00000027108	Ola1	2.28075	ENSMUSG00000042985	Upk3b	6.43005	ENSMUSG00000031521	Aga	3
ENSMUSG00000034116	Vav1	7.08571	ENSMUSG00000032584	Mst1r	9.52907	ENSMUSG00000034612	Chst11	4.39521	ENSMUSG00000027133	Nop10	2.82997	ENSMUSG00000043110	Lrrn4	7.24	ENSMUSG00000031613	Hpgd	6.69278
ENSMUSG00000034127	Tspan8	2.45108	ENSMUSG00000032661	Oas3	114.042	ENSMUSG00000034684	Sema3f	2.35022	ENSMUSG00000027134	Lpcat4	8.0082	ENSMUSG00000043366	Olfr78	4.33835	ENSMUSG00000031639	Tlr3	2.17937
ENSMUSG00000034157	Cipc	2.79661	ENSMUSG00000032688	Malt1	2.5293	ENSMUSG00000034708	Grn	2.58708	ENSMUSG00000027163	Commd9	2.7451	ENSMUSG00000043448	Gjc2	3.30097	ENSMUSG00000031740	Mmp2	2.27978
ENSMUSG00000034254	Agpat1	2.41015	ENSMUSG00000032690	Oas2	31.7248	ENSMUSG00000034730	Adgrb1	16.0909	ENSMUSG00000027204	Fbn1	2.9969	ENSMUSG00000043458	Pcdhb12	2.48913	ENSMUSG00000031767	Nudt7	4.32727
ENSMUSG00000034255	Arhgap27	5.2784	ENSMUSG00000032698	Lmo2	2.74627	ENSMUSG00000034854	Mfsd12	2.44175	ENSMUSG00000027208	Fgf7	2.7283	ENSMUSG00000043496	Tril	3.6176	ENSMUSG00000031782	Coq9	2.33548
ENSMUSG00000034265	Zdhhc14	2.88194	ENSMUSG00000032718	Mansc1	3.68062	ENSMUSG00000034875	Nudt19	3.89189	ENSMUSG00000027230	Creb3l1	5.53479	ENSMUSG00000043531	Sorcs1	4.98643	ENSMUSG00000031807	Pgls	3.76243
ENSMUSG00000034275	Igsf9b	2.60526	ENSMUSG00000032726	Bmp8a	3.09901	ENSMUSG00000034880	Mrpl34	2.73846	ENSMUSG00000027254	Map1a	2.46409	ENSMUSG00000043719	Col6a6	8.75473	ENSMUSG00000031813	Mvb12a	2.78531
ENSMUSG00000034382	AI661453	2.73429	ENSMUSG00000032758	Kap	233600	ENSMUSG00000034902	Pip5k1c	2.52282	ENSMUSG00000027287	Snap23	2.13164	ENSMUSG00000043822	Adamtsl5	3.05928	ENSMUSG00000031824	6430548M08Rik	8.76503
ENSMUSG00000034394	Lif	5.76069	ENSMUSG00000032812	Arap1	2.4513	ENSMUSG00000034917	Tjp3	5.49243	ENSMUSG00000027313	Chac1	6.07937	ENSMUSG00000043903	Gm22	9.16807	ENSMUSG00000031825	Crispld2	4.26291
ENSMUSG00000034435	Tmem30b	3.36469	ENSMUSG00000033088	Triobp	2.05725	ENSMUSG00000034926	Dhcr24	13.0758	ENSMUSG00000027315	Spint1	6.88889	ENSMUSG00000044017	Adgrd1	2.49007	ENSMUSG00000031851	Ntpcr	4.01205
ENSMUSG00000034438	Gbp8	8.40741	ENSMUSG00000033124	Atg9a	3.25363	ENSMUSG00000035093	Secisbp2l	2.0519	ENSMUSG00000027316	Gfra4	2.63303	ENSMUSG00000044042	Fmn1	2.01324	ENSMUSG00000031870	Pgr	2.97404
ENSMUSG00000034509	Mad2l1bp	2.66474	ENSMUSG00000033159	Cnppd1	2.15505	ENSMUSG00000035104	Eva1a	2.64662	ENSMUSG00000027318	Adam33	10.7912	ENSMUSG00000044080	S100a1	3.4053	ENSMUSG00000031887	Tradd	3.36842
ENSMUSG00000034607	Pof1b	3.45063	ENSMUSG00000033170	Card10	7.25501	ENSMUSG00000035105	Egln3	5	ENSMUSG00000027346	Gpcpd1	2.07904	ENSMUSG00000044229	Nxpe4	2.63725	ENSMUSG00000031891	Hsd11b2	59.7697
ENSMUSG00000034612	Chst11	2.86602	ENSMUSG00000033307	Mif	3.10219	ENSMUSG00000035184	Fam124a	3.62252	ENSMUSG00000027347	Rasgrp1	4.18333	ENSMUSG00000044408	Sptssa	3.31561	ENSMUSG00000031901	Dus2	2.32061
ENSMUSG00000034708	Grn	2.49392	ENSMUSG00000033318	Gstt2	2.96014	ENSMUSG00000035198	Tubg1	2.97902	ENSMUSG00000027357	Crls1	3.60409	ENSMUSG00000044456	Rin3	2.89655	ENSMUSG00000031906	Smpd3	28.2069
ENSMUSG00000034730	Adgrb1	22.6818	ENSMUSG00000033355	Rtp4	9.13068	ENSMUSG00000035212	Leprot	2.79781	ENSMUSG00000027371	Fahd2a	7.6375	ENSMUSG00000045062	Pcdhb7	2.17316	ENSMUSG00000031932	Gpr83	45.2083
ENSMUSG00000034799	Unc13a	2.84543	ENSMUSG00000033589	Reep4	2.20526	ENSMUSG00000035246	Pcyt1b	8.73554	ENSMUSG00000027399	Il1a	21.1538	ENSMUSG00000045092	S1pr1	2.61345	ENSMUSG00000031963	Bmper	11.7778
ENSMUSG00000034854	Mfsd12	2.71359	ENSMUSG00000033628	Pik3c3	3.817	ENSMUSG00000035314	Gdpd5	2.65783	ENSMUSG00000027408	Cpxm1	2.87763	ENSMUSG00000045312	Lhfpl2	2.79635	ENSMUSG00000031980	Agt	208
ENSMUSG00000034880	Mrpl34	2.77692	ENSMUSG00000033684	Qsox1	6.52327	ENSMUSG00000035342	Lzts2	2.64201	ENSMUSG00000027457	Snph	4.49268	ENSMUSG00000045362	Tnfrsf26	5.1037	ENSMUSG00000031983	2310022B05Rik	3.74078
ENSMUSG00000034902	Pip5k1c	3.24827	ENSMUSG00000033809	Alg3	3.46875	ENSMUSG00000035382	Pcsk7	2.86883	ENSMUSG00000027459	Fam110a	5.68868	ENSMUSG00000045594	Glb1	2.6	ENSMUSG00000032026	Rexo2	2.64833
ENSMUSG00000034917	Tjp3	5.32535	ENSMUSG00000033880	Lgals3bp	13.2716	ENSMUSG00000035429	Ptprh	75	ENSMUSG00000027460	Angpt4	44.3333	ENSMUSG00000045629	Sh3tc2	9	ENSMUSG00000032060	Cryab	14.0256
ENSMUSG00000034926	Dhcr24	19.326	ENSMUSG00000033906	Zdhhc15	3.94565	ENSMUSG00000035451	Foxa1	4.8	ENSMUSG00000027488	Snta1	4.13103	ENSMUSG00000045657	Pcdhb10	2.76744	ENSMUSG00000032062	2310030G06Rik	10.5926
ENSMUSG00000035104	Eva1a	2.13158	ENSMUSG00000034112	Atp2c2	111.51	ENSMUSG00000035504	Reep6	2.54118	ENSMUSG00000027514	Zbp1	4.52439	ENSMUSG00000045813	Gm9801	2.21538	ENSMUSG00000032067	Pts	4.03788
ENSMUSG00000035105	Egln3	15.3324	ENSMUSG00000034116	Vav1	6.8	ENSMUSG00000035547	Capn5	5.61887	ENSMUSG00000027520	Zdbf2	6.21656	ENSMUSG00000045932	Ifit2	2.10718	ENSMUSG00000032068	Plet1	5.44225
ENSMUSG00000035184	Fam124a	4.88742	ENSMUSG00000034127	Tspan8	2.20605	ENSMUSG00000035566	Pcdh17	9.48148	ENSMUSG00000027546	Atp9a	2.53339	ENSMUSG00000046157	Tmem229b	13	ENSMUSG00000032122	Slc37a2	9.65789
ENSMUSG00000035198	Tubg1	2.06294	ENSMUSG00000034157	Cipc	2.21751	ENSMUSG00000035637	Grhpr	3.09677	ENSMUSG00000027555	Car13	3.7268	ENSMUSG00000046352	Gjb2	3.57895	ENSMUSG00000032123	Dpagt1	2.27978
ENSMUSG00000035212	Leprot	2.55172	ENSMUSG00000034203	Chchd4	2.05	ENSMUSG00000035638	Muc20	12.9813	ENSMUSG00000027566	Psma7	2.69732	ENSMUSG00000046402	Rbp1	3.2691	ENSMUSG00000032231	Anxa2	2.43653
ENSMUSG00000035246	Pcyt1b	4.66942	ENSMUSG00000034254	Agpat1	3.02743	ENSMUSG00000035674	Ndufa3	2.14286	ENSMUSG00000027574	Nkain4	38.6667	ENSMUSG00000046491	C1qtnf2	3.59302	ENSMUSG00000032246	Calml4	2.88489
ENSMUSG00000035314	Gdpd5	3.0012	ENSMUSG00000034255	Arhgap27	4.92056	ENSMUSG00000035683	Melk	3.47	ENSMUSG00000027593	Raly	4.82871	ENSMUSG00000046572	Zfp518b	2.41018	ENSMUSG00000032289	Thsd4	6.56917
ENSMUSG00000035429	Ptprh	212.167	ENSMUSG00000034265	Zdhhc14	3.01389	ENSMUSG00000035722	Abca7	2.38219	ENSMUSG00000027596	a	4.92884	ENSMUSG00000046699	Slitrk4	14.8947	ENSMUSG00000032313	Tmem266	16.2727
ENSMUSG00000035451	Foxa1	9.06	ENSMUSG00000034371	Tkfc	2.83594	ENSMUSG00000035775	Krt20	60.6875	ENSMUSG00000027597	Ahcy	6.00888	ENSMUSG00000046718	Bst2	9.21966	ENSMUSG00000032314	Etfa	3.12638
ENSMUSG00000035498	Cdcp1	2.39245	ENSMUSG00000034382	AI661453	2.57277	ENSMUSG00000035790	Cep19	4.52459	ENSMUSG00000027636	Sla2	2.35119	ENSMUSG00000047414	Flrt2	4.04764	ENSMUSG00000032332	Col12a1	2.94349
ENSMUSG00000035547	Capn5	6.84927	ENSMUSG00000034394	Lif	5.04498	ENSMUSG00000035861	Tmprss11b	105.103	ENSMUSG00000027656	Wisp2	57.9091	ENSMUSG00000047557	Lxn	2.34677	ENSMUSG00000032334	Loxl1	7.41805
ENSMUSG00000035566	Pcdh17	19.3642	ENSMUSG00000034422	Parp14	2.22825	ENSMUSG00000035885	Cox8a	2.14526	ENSMUSG00000027661	Slc2a10	2.59259	ENSMUSG00000047730	Fcgbp	11.7056	ENSMUSG00000032353	Tmed3	5.833
ENSMUSG00000035638	Muc20	20.2699	ENSMUSG00000034435	Tmem30b	3.3425	ENSMUSG00000035890	Rnf126	2.04487	ENSMUSG00000027663	Zmat3	3.8869	ENSMUSG00000048022	Tmem229a	4.62077	ENSMUSG00000032359	Ctsh	7.4678
ENSMUSG00000035674	Ndufa3	2.26316	ENSMUSG00000034459	Ifit1	7.94323	ENSMUSG00000035934	Pknox2	3.16667	ENSMUSG00000027673	Ndufb5	2.39271	ENSMUSG00000048078	Tenm4	4.68199	ENSMUSG00000032369	Plscr1	4.91093
ENSMUSG00000035681	Kcnc2	2.30416	ENSMUSG00000034607	Pof1b	3.85458	ENSMUSG00000036002	Fam214b	3.04751	ENSMUSG00000027699	Ect2	3.18919	ENSMUSG00000048126	Col6a3	12.0251	ENSMUSG00000032372	Plscr2	10.2917
ENSMUSG00000035683	Melk	5.96	ENSMUSG00000034612	Chst11	3.46482	ENSMUSG00000036046	5031439G07Rik	3.0653	ENSMUSG00000027715	Ccna2	3.49254	ENSMUSG00000048368	Omd	10.1196	ENSMUSG00000032373	Car12	118.727
ENSMUSG00000035692	Isg15	5.34043	ENSMUSG00000034708	Grn	3.41209	ENSMUSG00000036136	Fam110c	3.50881	ENSMUSG00000027737	Slc7a11	3.25439	ENSMUSG00000049112	Oxtr	22.6433	ENSMUSG00000032374	Plod2	7.80618
ENSMUSG00000035775	Krt20	174.312	ENSMUSG00000034714	Ttyh2	3.32955	ENSMUSG00000036246	Gmip	2.38318	ENSMUSG00000027742	Cog6	2.45356	ENSMUSG00000049299	Trappc1	2.08571	ENSMUSG00000032377	Plscr4	2.50957
ENSMUSG00000035781	R3hdm4	2.7472	ENSMUSG00000034730	Adgrb1	17.8182	ENSMUSG00000036299	BC031181	2.52244	ENSMUSG00000027797	Dclk1	9.50085	ENSMUSG00000049307	Fut4	6.32609	ENSMUSG00000032381	Fam96a	2.19687
ENSMUSG00000035790	Cep19	3.14208	ENSMUSG00000034799	Unc13a	2.36593	ENSMUSG00000036306	Lzts1	8.38298	ENSMUSG00000027800	Tm4sf1	6.86998	ENSMUSG00000049420	Tmem200a	4.76178	ENSMUSG00000032383	Ppib	2.61564
ENSMUSG00000035831	Krt25	7.97143	ENSMUSG00000034853	Acot11	2.83744	ENSMUSG00000036330	Slc18a1	3.08738	ENSMUSG00000027828	Ssr3	2.52292	ENSMUSG00000049526	Tmem202	3.39286	ENSMUSG00000032418	Me1	3.04297
ENSMUSG00000035852	Misp	8.62898	ENSMUSG00000034854	Mfsd12	2.63592	ENSMUSG00000036402	Gng12	12.2036	ENSMUSG00000027840	Wnt2b	4.83422	ENSMUSG00000049624	Slc17a5	2.22923	ENSMUSG00000032431	Crtap	3.21467
ENSMUSG00000035861	Tmprss11b	172.586	ENSMUSG00000034875	Nudt19	2.71622	ENSMUSG00000036499	Eea1	2.63734	ENSMUSG00000027848	Olfml3	5.9936	ENSMUSG00000049717	Lig4	2.39286	ENSMUSG00000032436	Cmtm7	2.44068
ENSMUSG00000035885	Cox8a	2.34486	ENSMUSG00000034880	Mrpl34	2.38462	ENSMUSG00000036523	Greb1	4.89859	ENSMUSG00000027849	Syt6	4.24194	ENSMUSG00000050069	Grem2	5.00548	ENSMUSG00000032440	Tgfbr2	2.55881
ENSMUSG00000035914	Cd276	2.8128	ENSMUSG00000034902	Pip5k1c	3.44744	ENSMUSG00000036553	Sh3tc1	4.60465	ENSMUSG00000027890	Gstm4	3.13333	ENSMUSG00000050103	Agmo	2.4	ENSMUSG00000032491	Nradd	2.79775
ENSMUSG00000036002	Fam214b	5.0905	ENSMUSG00000034917	Tjp3	5.44136	ENSMUSG00000036560	Lgi4	2.52775	ENSMUSG00000027907	S100a11	3.16785	ENSMUSG00000050174	Nudt6	2.17176	ENSMUSG00000032496	Ltf	18.5276
ENSMUSG00000036046	5031439G07Rik	3.05833	ENSMUSG00000034926	Dhcr24	15.0379	ENSMUSG00000036718	Micall2	6.80258	ENSMUSG00000027931	Npr1	5.35927	ENSMUSG00000050212	Eva1b	2.4314	ENSMUSG00000032537	Ephb1	11.7568
ENSMUSG00000036067	Slc2a6	4.56886	ENSMUSG00000034947	Tmem106a	3.08571	ENSMUSG00000036825	Ssx2ip	3.18433	ENSMUSG00000027955	Fam198b	7.79441	ENSMUSG00000050272	Dscam	31.2949	ENSMUSG00000032548	Slco2a1	45.3846
ENSMUSG00000036109	Mbnl3	2.13883	ENSMUSG00000035105	Egln3	13.7411	ENSMUSG00000036834	Plch1	2.5262	ENSMUSG00000027962	Vcam1	25.5817	ENSMUSG00000050335	Lgals3	3.23756	ENSMUSG00000032549	Rab6b	15.8313
ENSMUSG00000036136	Fam110c	4.87347	ENSMUSG00000035181	Heatr5a	2.00067	ENSMUSG00000036894	Rap2b	4.72973	ENSMUSG00000027963	Extl2	2.03578	ENSMUSG00000050377	Il31ra	10.7955	ENSMUSG00000032554	Trf	26.402
ENSMUSG00000036246	Gmip	2.00701	ENSMUSG00000035184	Fam124a	5.74834	ENSMUSG00000036908	Unc93b1	3.67769	ENSMUSG00000027983	Cyp2u1	5.93478	ENSMUSG00000050635	Sprr2f	15.3333	ENSMUSG00000032572	Col6a4	26.3172
ENSMUSG00000036306	Lzts1	6.76596	ENSMUSG00000035208	Slfn8	3.4812	ENSMUSG00000036985	Zdhhc9	2.11412	ENSMUSG00000027994	Ccdc109b	5.26667	ENSMUSG00000050732	Vamp8	2.81481	ENSMUSG00000032584	Mst1r	3.56104
ENSMUSG00000036330	Slc18a1	3.78641	ENSMUSG00000035212	Leprot	2.78527	ENSMUSG00000036992	Nxt1	2.32039	ENSMUSG00000027996	Sfrp2	3.6058	ENSMUSG00000050751	Pgbd5	3.57083	ENSMUSG00000032609	Klhdc8b	3.57398
ENSMUSG00000036356	Csgalnact1	2.12027	ENSMUSG00000035246	Pcyt1b	6.32231	ENSMUSG00000037033	Clca3b	11.0195	ENSMUSG00000028003	Lrat	27.3544	ENSMUSG00000051041	Olfml1	3.68672	ENSMUSG00000032649	Colgalt2	24.0206
ENSMUSG00000036402	Gng12	8.93126	ENSMUSG00000035273	Hpse	2.22143	ENSMUSG00000037035	Inhbb	4.96843	ENSMUSG00000028007	Snx7	7.89109	ENSMUSG00000051048	P4ha3	10.2474	ENSMUSG00000032726	Bmp8a	14.1739
ENSMUSG00000036553	Sh3tc1	4.21395	ENSMUSG00000035314	Gdpd5	2.4747	ENSMUSG00000037060	Prkcdbp	5.80632	ENSMUSG00000028013	Ppa2	2.19945	ENSMUSG00000051076	Vtcn1	2.15426	ENSMUSG00000032757	Bet1	2.27864
ENSMUSG00000036560	Lgi4	2.38429	ENSMUSG00000035382	Pcsk7	2.02857	ENSMUSG00000037095	Lrg1	196.4	ENSMUSG00000028037	Ifi44	11.8545	ENSMUSG00000051154	Commd3	2.48872	ENSMUSG00000032763	Ilvbl	2.81013
ENSMUSG00000036611	Eepd1	3.32166	ENSMUSG00000035429	Ptprh	174.167	ENSMUSG00000037145	2210407C18Rik	61.2388	ENSMUSG00000028062	Lamtor2	3.13934	ENSMUSG00000051242	Pcdhb9	3.01058	ENSMUSG00000032878	Ccdc85a	15.9286
ENSMUSG00000036620	Mgat4b	3.39761	ENSMUSG00000035451	Foxa1	9.73333	ENSMUSG00000037151	Lrrc20	6.58974	ENSMUSG00000028070	Apoa1bp	2.44518	ENSMUSG00000051359	Ncald	5.22069	ENSMUSG00000032966	Fkbp1a	2.22337
ENSMUSG00000036718	Micall2	7.13161	ENSMUSG00000035498	Cdcp1	2.64616	ENSMUSG00000037169	Mycn	3.60626	ENSMUSG00000028108	Ecm1	3.92031	ENSMUSG00000051486	Pcdhb11	2.56279	ENSMUSG00000033088	Triobp	2.64852
ENSMUSG00000036856	Wnt4	2.38589	ENSMUSG00000035547	Capn5	5.70459	ENSMUSG00000037190	Cyb561d2	2.6962	ENSMUSG00000028111	Ctsk	5.27907	ENSMUSG00000051550	Zfp579	2.28509	ENSMUSG00000033096	Apmap	2.09487
ENSMUSG00000036894	Rap2b	5.59459	ENSMUSG00000035566	Pcdh17	21.2315	ENSMUSG00000037221	Mospd3	2.57143	ENSMUSG00000028121	Bcar3	3.7611	ENSMUSG00000051599	Pcdhb2	2.79439	ENSMUSG00000033170	Card10	2.40884
ENSMUSG00000036908	Unc93b1	3	ENSMUSG00000035637	Grhpr	2.39171	ENSMUSG00000037347	Chst7	2.68571	ENSMUSG00000028125	Abca4	37.2941	ENSMUSG00000052105	Mtcl1	2.38184	ENSMUSG00000033287	Kctd17	2.97882
ENSMUSG00000036931	Nfkbid	4.01372	ENSMUSG00000035638	Muc20	17.3729	ENSMUSG00000037349	Nudt22	2.74444	ENSMUSG00000028132	Tmem56	2.96073	ENSMUSG00000052133	Sema5b	2.97156	ENSMUSG00000033313	Fbxl8	3.04167
ENSMUSG00000037033	Clca3b	8.42412	ENSMUSG00000035681	Kcnc2	2.39168	ENSMUSG00000037366	Pafah2	3.11417	ENSMUSG00000028159	Dapp1	3.76506	ENSMUSG00000052316	Lrrc15	7.58	ENSMUSG00000033327	Tnxb	2.06713
ENSMUSG00000037035	Inhbb	2.77146	ENSMUSG00000035683	Melk	5.12	ENSMUSG00000037419	Endod1	3.31503	ENSMUSG00000028197	Col24a1	4.99104	ENSMUSG00000052516	Robo2	2.45632	ENSMUSG00000033386	Frrs1	2.03912
ENSMUSG00000037060	Prkcdbp	8.90119	ENSMUSG00000035692	Isg15	6.87234	ENSMUSG00000037490	Slc2a12	6.74651	ENSMUSG00000028199	Cryz	3.3046	ENSMUSG00000052593	Adam17	2.275	ENSMUSG00000033450	Tagap	3.78081
ENSMUSG00000037095	Lrg1	182.12	ENSMUSG00000035775	Krt20	97.3438	ENSMUSG00000037580	Gch1	2.16315	ENSMUSG00000028255	Clca1	67.8571	ENSMUSG00000052776	Oas1a	47.4444	ENSMUSG00000033569	Adgrb3	11.0938
ENSMUSG00000037145	2210407C18Rik	67.5325	ENSMUSG00000035781	R3hdm4	2.69078	ENSMUSG00000037601	Nme1	2.32193	ENSMUSG00000028268	Gbp3	2.55007	ENSMUSG00000052854	Nrk	5.21154	ENSMUSG00000033576	Apol6	16.1429
ENSMUSG00000037151	Lrrc20	7.53846	ENSMUSG00000035831	Krt25	3.87143	ENSMUSG00000037613	Tnfrsf23	5.72283	ENSMUSG00000028270	Gbp2	2.70458	ENSMUSG00000052889	Prkcb	2.62283	ENSMUSG00000033629	Hacd3	2.74815
ENSMUSG00000037169	Mycn	5.06919	ENSMUSG00000035852	Misp	5.91166	ENSMUSG00000037669	Ldah	2.06878	ENSMUSG00000028273	Pdlim5	2.47856	ENSMUSG00000052914	Cyp2j6	2.58989	ENSMUSG00000033684	Qsox1	3.46929
ENSMUSG00000037280	Galnt6	11.3871	ENSMUSG00000035861	Tmprss11b	94.0345	ENSMUSG00000037706	Cd81	2.55522	ENSMUSG00000028293	Slc35a1	2.438	ENSMUSG00000053004	Hrh1	3.68493	ENSMUSG00000033715	Akr1c14	25.3222
ENSMUSG00000037347	Chst7	4.15238	ENSMUSG00000035885	Cox8a	2.19763	ENSMUSG00000037820	Tgm2	25.1817	ENSMUSG00000028300	3110043O21Rik	3.42539	ENSMUSG00000053117	E330013P04Rik	2.28522	ENSMUSG00000033809	Alg3	4.95
ENSMUSG00000037419	Endod1	3.68795	ENSMUSG00000035914	Cd276	3.79831	ENSMUSG00000037824	Tspan14	2.84008	ENSMUSG00000028328	Tmod1	2.83193	ENSMUSG00000053158	Fes	2.01429	ENSMUSG00000033880	Lgals3bp	5.8924
ENSMUSG00000037580	Gch1	2.58685	ENSMUSG00000036002	Fam214b	4.23529	ENSMUSG00000037833	Sh2d4b	5.77955	ENSMUSG00000028339	Col15a1	2.54239	ENSMUSG00000053279	Aldh1a1	9.82745	ENSMUSG00000034040	Wbscr17	2.50835
ENSMUSG00000037613	Tnfrsf23	6.96739	ENSMUSG00000036046	5031439G07Rik	2.98804	ENSMUSG00000037946	Fgd3	6.40732	ENSMUSG00000028351	Brinp1	36550	ENSMUSG00000053317	Sec61b	3.58738	ENSMUSG00000034117	Ptgdr2	2.6444
ENSMUSG00000037706	Cd81	2.11807	ENSMUSG00000036067	Slc2a6	4.70958	ENSMUSG00000037960	Card19	2.0873	ENSMUSG00000028367	Txn1	2.43786	ENSMUSG00000053368	Rxfp2	7.25322	ENSMUSG00000034205	Loxl2	7.92135
ENSMUSG00000037820	Tgm2	22.4766	ENSMUSG00000036136	Fam110c	3.79124	ENSMUSG00000038020	Rapgefl1	13.7354	ENSMUSG00000028378	Ptgr1	4.89844	ENSMUSG00000053442	4930597O21Rik	2.47059	ENSMUSG00000034271	Jdp2	4.33812
ENSMUSG00000037824	Tspan14	2.99918	ENSMUSG00000036330	Slc18a1	3.65049	ENSMUSG00000038023	Atp6v0a2	3.85368	ENSMUSG00000028393	Alad	8.6808	ENSMUSG00000053615	Gm9913	2.33803	ENSMUSG00000034371	Tkfc	4.41085
ENSMUSG00000037833	Sh2d4b	4.775	ENSMUSG00000036356	Csgalnact1	3.02405	ENSMUSG00000038034	Igsf8	3.50487	ENSMUSG00000028398	Tmem261	3.26087	ENSMUSG00000053835	H2-T24	3.37674	ENSMUSG00000034394	Lif	8.54945
ENSMUSG00000037907	Ankrd13b	2.57474	ENSMUSG00000036402	Gng12	11.1868	ENSMUSG00000038094	Atp13a4	20	ENSMUSG00000028412	Slc44a1	2.81469	ENSMUSG00000054162	Spock3	11.76	ENSMUSG00000034435	Tmem30b	46.3793
ENSMUSG00000037921	Ddx60	3.50523	ENSMUSG00000036553	Sh3tc1	3.33488	ENSMUSG00000038172	Ttc39b	2.46336	ENSMUSG00000028413	B4galt1	2.06034	ENSMUSG00000054196	Cthrc1	20.6364	ENSMUSG00000034460	Six4	4.78342
ENSMUSG00000037946	Fgd3	7.64268	ENSMUSG00000036560	Lgi4	2.99791	ENSMUSG00000038178	Slc43a2	3.33796	ENSMUSG00000028419	Chmp5	2.07892	ENSMUSG00000054203	Ifi205	3.5	ENSMUSG00000034675	Dbn1	4.27173
ENSMUSG00000037999	Arap2	2.3703	ENSMUSG00000036606	Plxnb2	2.20294	ENSMUSG00000038256	Bcl9	5.30573	ENSMUSG00000028434	Epb41l4b	3.6	ENSMUSG00000054312	Mrps21	2.69565	ENSMUSG00000034684	Sema3f	4.24658
ENSMUSG00000038011	Dnah10	8.16981	ENSMUSG00000036611	Eepd1	2.57643	ENSMUSG00000038295	Atg9b	33.6832	ENSMUSG00000028447	Dctn3	3.94017	ENSMUSG00000054404	Slfn5	4.07166	ENSMUSG00000034685	Fam171a2	2.67636
ENSMUSG00000038020	Rapgefl1	6.4631	ENSMUSG00000036620	Mgat4b	2.65606	ENSMUSG00000038354	Ankrd35	3.77059	ENSMUSG00000028455	Stoml2	2.37908	ENSMUSG00000054453	Sytl5	5.3865	ENSMUSG00000034687	Fras1	11.9559
ENSMUSG00000038023	Atp6v0a2	4.03719	ENSMUSG00000036718	Micall2	7.53548	ENSMUSG00000038366	Lasp1	2.80837	ENSMUSG00000028466	Creb3	2.46809	ENSMUSG00000054555	Adam12	6.07844	ENSMUSG00000034708	Grn	3.2018
ENSMUSG00000038034	Igsf8	3.27955	ENSMUSG00000036825	Ssx2ip	2.09361	ENSMUSG00000038370	Pcp4l1	5.84	ENSMUSG00000028480	Glipr2	2.80645	ENSMUSG00000054619	Mettl7a1	3.79028	ENSMUSG00000034748	Sirt6	2.98462
ENSMUSG00000038067	Csf3	3.14145	ENSMUSG00000036834	Plch1	2.87813	ENSMUSG00000038372	Gmds	7.87413	ENSMUSG00000028497	Hacd4	8.59528	ENSMUSG00000054675	Tmem119	9.0802	ENSMUSG00000034755	Pcdh11x	4.25974
ENSMUSG00000038094	Atp13a4	17.3529	ENSMUSG00000036894	Rap2b	5.24324	ENSMUSG00000038375	Trp53inp2	3.59039	ENSMUSG00000028528	Dnajc6	13.8836	ENSMUSG00000054793	Cadm4	4.27731	ENSMUSG00000034780	B3galt1	3.13968
ENSMUSG00000038217	Tlcd2	2.66021	ENSMUSG00000036899	Trpv5	27.0729	ENSMUSG00000038497	Tmco3	2.56966	ENSMUSG00000028549	Itgb3bp	2.46829	ENSMUSG00000054843	Atrnl1	2.08086	ENSMUSG00000034786	Gpsm3	4.41176
ENSMUSG00000038256	Bcl9	4.48758	ENSMUSG00000036908	Unc93b1	3.60744	ENSMUSG00000038534	Osbpl7	3.04854	ENSMUSG00000028583	Pdpn	2.77193	ENSMUSG00000055301	Adh7	11.1111	ENSMUSG00000034853	Acot11	6.43382
ENSMUSG00000038295	Atg9b	57.6634	ENSMUSG00000036931	Nfkbid	2.80933	ENSMUSG00000038600	Atp6v0a4	7.74907	ENSMUSG00000028597	Gpx7	3.88333	ENSMUSG00000055489	Ano5	44.9444	ENSMUSG00000034871	Fam151a	14.3542
ENSMUSG00000038354	Ankrd35	4.71765	ENSMUSG00000037033	Clca3b	6.24514	ENSMUSG00000038618	Rassf7	2.25505	ENSMUSG00000028599	Tnfrsf1b	6.52225	ENSMUSG00000055632	Hmcn2	3.57855	ENSMUSG00000034875	Nudt19	2.49782
ENSMUSG00000038366	Lasp1	2.52167	ENSMUSG00000037035	Inhbb	3.43939	ENSMUSG00000038642	Ctss	6.20732	ENSMUSG00000028600	Podn	3.22936	ENSMUSG00000055761	Nkain3	3.17379	ENSMUSG00000034880	Mrpl34	3.98413
ENSMUSG00000038370	Pcp4l1	2.95111	ENSMUSG00000037095	Lrg1	311.04	ENSMUSG00000038668	Lpar1	11.598	ENSMUSG00000028603	Scp2	2.06313	ENSMUSG00000055912	Tmem150a	3.33641	ENSMUSG00000034947	Tmem106a	4.64414
ENSMUSG00000038372	Gmds	6.3986	ENSMUSG00000037145	2210407C18Rik	85.3147	ENSMUSG00000038702	Dsel	4.31714	ENSMUSG00000028617	Lrrc42	2.57143	ENSMUSG00000056116	H2-T22	2.57692	ENSMUSG00000034959	Rubcnl	3.25
ENSMUSG00000038375	Trp53inp2	2.84246	ENSMUSG00000037151	Lrrc20	6.94872	ENSMUSG00000038712	Fam63a	2.79934	ENSMUSG00000028636	Ppcs	2.97297	ENSMUSG00000056144	Trim34a	2.45455	ENSMUSG00000034997	Htr2a	3.49275
ENSMUSG00000038412	Higd1a	2.07543	ENSMUSG00000037169	Mycn	4.27677	ENSMUSG00000038745	Nlrp6	26.6536	ENSMUSG00000028647	Mycbp	2.58407	ENSMUSG00000056174	Col8a2	10.1951	ENSMUSG00000035000	Dpp4	19.227
ENSMUSG00000038600	Atp6v0a4	5.34944	ENSMUSG00000037280	Galnt6	6.18548	ENSMUSG00000038801	Scgb1c1	41.7	ENSMUSG00000028648	Ndufs5	2.30303	ENSMUSG00000056313	1810011O10Rik	2.09083	ENSMUSG00000035104	Eva1a	5.36082
ENSMUSG00000038618	Rassf7	2.9211	ENSMUSG00000037347	Chst7	4.69524	ENSMUSG00000038807	Rap1gap2	3.3626	ENSMUSG00000028671	Gale	9.48148	ENSMUSG00000056476	Med12l	2.59884	ENSMUSG00000035107	Dcbld2	4.06292
ENSMUSG00000038642	Ctss	7.97561	ENSMUSG00000037366	Pafah2	2.15748	ENSMUSG00000038879	Nipal2	3.96375	ENSMUSG00000028672	Hmgcl	2.46681	ENSMUSG00000056486	Chn1	5.25316	ENSMUSG00000035131	Brinp3	14.9412
ENSMUSG00000038668	Lpar1	9.79604	ENSMUSG00000037406	Htra4	5.77143	ENSMUSG00000038963	Slco4a1	43.1007	ENSMUSG00000028673	Fuca1	3.83068	ENSMUSG00000056515	Rab31	6.05797	ENSMUSG00000035198	Tubg1	2.27222
ENSMUSG00000038745	Nlrp6	10.648	ENSMUSG00000037419	Endod1	3.15368	ENSMUSG00000039157	Fam102a	2.20682	ENSMUSG00000028684	Urod	2.14128	ENSMUSG00000056612	Ppp1r14b	2.59064	ENSMUSG00000035206	Sppl2b	2.12772
ENSMUSG00000038781	Stap2	2.40063	ENSMUSG00000037601	Nme1	2.29577	ENSMUSG00000039168	Dap	3.14088	ENSMUSG00000028719	Cmpk1	5.41565	ENSMUSG00000056643	Chst13	292.537	ENSMUSG00000035212	Leprot	3.06474
ENSMUSG00000038801	Scgb1c1	15.4	ENSMUSG00000037613	Tnfrsf23	5.02717	ENSMUSG00000039193	Nlrc4	32.7273	ENSMUSG00000028743	Akr7a5	2.25392	ENSMUSG00000056755	Grm7	7.7766	ENSMUSG00000035273	Hpse	6
ENSMUSG00000038807	Rap1gap2	2.97561	ENSMUSG00000037669	Ldah	2.09259	ENSMUSG00000039195	1110008P14Rik	2.7902	ENSMUSG00000028763	Hspg2	2.48109	ENSMUSG00000056900	Usp13	2.21419	ENSMUSG00000035279	Ssc5d	5.80349
ENSMUSG00000038879	Nipal2	4.30704	ENSMUSG00000037706	Cd81	2.23658	ENSMUSG00000039372	March4	35.2581	ENSMUSG00000028766	Alpl	10.4658	ENSMUSG00000057137	Tmem140	2.51553	ENSMUSG00000035314	Gdpd5	2.15413
ENSMUSG00000038963	Slco4a1	36.0396	ENSMUSG00000037816	Fbxw17	2.85081	ENSMUSG00000039450	Dcxr	3.07273	ENSMUSG00000028776	Tinagl1	2.75714	ENSMUSG00000057315	Arhgap24	3.60059	ENSMUSG00000035342	Lzts2	2.28855
ENSMUSG00000039157	Fam102a	3.60633	ENSMUSG00000037820	Tgm2	23.4044	ENSMUSG00000039474	Wfs1	9.88011	ENSMUSG00000028782	Adgrb2	4.28912	ENSMUSG00000057969	Sema3b	4.46012	ENSMUSG00000035373	Ccl7	6.38415
ENSMUSG00000039168	Dap	2.70718	ENSMUSG00000037824	Tspan14	2.54192	ENSMUSG00000039481	Nrtn	8.2027	ENSMUSG00000028804	Csmd2	77.1667	ENSMUSG00000058427	Cxcl2	8.32708	ENSMUSG00000035385	Ccl2	3.59895
ENSMUSG00000039193	Nlrc4	53.2727	ENSMUSG00000037833	Sh2d4b	4.80682	ENSMUSG00000039616	Mocos	4.30303	ENSMUSG00000028836	Slc30a2	135.521	ENSMUSG00000058624	Gda	6.5974	ENSMUSG00000035413	Tmem98	5.94064
ENSMUSG00000039195	1110008P14Rik	3.25268	ENSMUSG00000037921	Ddx60	5.88153	ENSMUSG00000039662	Icmt	2.34904	ENSMUSG00000028838	Extl1	29.7857	ENSMUSG00000058914	C1qtnf3	5.91855	ENSMUSG00000035431	Sstr1	10.2963
ENSMUSG00000039208	Metrnl	2.45015	ENSMUSG00000037946	Fgd3	6.00854	ENSMUSG00000039671	Zmynd8	2.28161	ENSMUSG00000028843	Sh3bgrl3	3.29954	ENSMUSG00000059022	Kcp	3.78007	ENSMUSG00000035513	Ntng2	2.40762
ENSMUSG00000039372	March4	35.4516	ENSMUSG00000037974	Muc5ac	9.18182	ENSMUSG00000039678	Tbc1d13	3.85587	ENSMUSG00000028845	Tekt2	3.68553	ENSMUSG00000059534	Uqcr10	2.47034	ENSMUSG00000035559	Mpv17l2	2.4359
ENSMUSG00000039450	Dcxr	2.60545	ENSMUSG00000038011	Dnah10	5.24528	ENSMUSG00000039697	Ncoa7	3.5272	ENSMUSG00000028847	Trappc3	2.03041	ENSMUSG00000059751	Rps3a3	12.6569	ENSMUSG00000035674	Ndufa3	3.21739
ENSMUSG00000039474	Wfs1	5.66698	ENSMUSG00000038020	Rapgefl1	3.6285	ENSMUSG00000039745	Htatip2	7.10345	ENSMUSG00000028860	Sytl1	5.31081	ENSMUSG00000059810	Rgs3	2.86128	ENSMUSG00000035845	Alg12	3.42105
ENSMUSG00000039481	Nrtn	5.74324	ENSMUSG00000038023	Atp6v0a2	3.42603	ENSMUSG00000039747	Orai2	4.00939	ENSMUSG00000028871	Rspo1	6.42918	ENSMUSG00000059895	Ptp4a3	2.58153	ENSMUSG00000035914	Cd276	3.00437
ENSMUSG00000039616	Mocos	6.12121	ENSMUSG00000038034	Igsf8	3.50765	ENSMUSG00000039774	Galnt12	3.58803	ENSMUSG00000028883	Sema3a	3.82828	ENSMUSG00000059901	Adamts14	8.35802	ENSMUSG00000035930	Chst4	64
ENSMUSG00000039678	Tbc1d13	3.09609	ENSMUSG00000038094	Atp13a4	24.7059	ENSMUSG00000039887	Alg14	3.76147	ENSMUSG00000028885	Smpdl3b	5.87143	ENSMUSG00000059908	Mug1	153800	ENSMUSG00000035954	Dock4	4.06429
ENSMUSG00000039697	Ncoa7	4.97392	ENSMUSG00000038172	Ttc39b	2.26459	ENSMUSG00000039954	Stk32a	11.1977	ENSMUSG00000028919	Arhgef19	13.4375	ENSMUSG00000060032	H2afj	2.49597	ENSMUSG00000036002	Fam214b	2.40888
ENSMUSG00000039774	Galnt12	6.7993	ENSMUSG00000038256	Bcl9	3.53547	ENSMUSG00000039997	Ifi203	5.86484	ENSMUSG00000028927	Padi2	38.8415	ENSMUSG00000060063	Alox5ap	7.33333	ENSMUSG00000036006	Fam65b	4.18798
ENSMUSG00000039887	Alg14	2.25382	ENSMUSG00000038295	Atg9b	41.1782	ENSMUSG00000040007	Bahd1	2.31311	ENSMUSG00000028937	Acot7	3.45652	ENSMUSG00000060212	Pcnx2	5.30769	ENSMUSG00000036026	Tmem63b	2.56877
ENSMUSG00000039954	Stk32a	12.9884	ENSMUSG00000038311	2410017I17Rik	13.6341	ENSMUSG00000040105	Plpp6	2.81056	ENSMUSG00000028961	Pgd	2.92857	ENSMUSG00000060224	Pyroxd2	3.5	ENSMUSG00000036036	Zfp57	2.50839
ENSMUSG00000039997	Ifi203	16.1595	ENSMUSG00000038354	Ankrd35	3.57059	ENSMUSG00000040158	Tax1bp3	2.22236	ENSMUSG00000028964	Park7	2.59056	ENSMUSG00000060441	Trim5	3.26027	ENSMUSG00000036040	Adamtsl2	4.18421
ENSMUSG00000040007	Bahd1	2.15574	ENSMUSG00000038366	Lasp1	2.48631	ENSMUSG00000040188	Scamp2	2.10632	ENSMUSG00000028973	Abcb8	3.14045	ENSMUSG00000060459	Kng2	12.1579	ENSMUSG00000036062	Phf24	4.70807
ENSMUSG00000040158	Tax1bp3	2.20248	ENSMUSG00000038370	Pcp4l1	2.67556	ENSMUSG00000040322	Slc25a24	2.35034	ENSMUSG00000028980	H6pd	2.53844	ENSMUSG00000060487	Samd5	3.19355	ENSMUSG00000036078	Sigmar1	2.18238
ENSMUSG00000040188	Scamp2	2.47874	ENSMUSG00000038372	Gmds	7.08217	ENSMUSG00000040364	Sec1	2.8535	ENSMUSG00000028989	Angptl7	3.93548	ENSMUSG00000060572	Mfap2	12.6307	ENSMUSG00000036098	Myrf	45.9818
ENSMUSG00000040322	Slc25a24	2.75429	ENSMUSG00000038375	Trp53inp2	2.22572	ENSMUSG00000040447	Spns2	6.53131	ENSMUSG00000029005	Draxin	4.24375	ENSMUSG00000060735	Rxfp3	17.75	ENSMUSG00000036106	Prr5	2.31169
ENSMUSG00000040356	Skiv2l	2.38519	ENSMUSG00000038507	Parp12	3.03934	ENSMUSG00000040462	Os9	2.40693	ENSMUSG00000029053	Prkcz	8.18919	ENSMUSG00000060988	Galnt13	13	ENSMUSG00000036136	Fam110c	18.6891
ENSMUSG00000040364	Sec1	6.57962	ENSMUSG00000038525	Armc10	2.21948	ENSMUSG00000040525	Cblc	4.05342	ENSMUSG00000029061	Mmp23	3.01145	ENSMUSG00000061086	Myl4	2.38235	ENSMUSG00000036218	Pdzrn4	6.77143
ENSMUSG00000040389	Wdr47	2.30769	ENSMUSG00000038600	Atp6v0a4	5.38476	ENSMUSG00000040548	Tex2	13.2951	ENSMUSG00000029063	Nadk	2.05532	ENSMUSG00000061175	Fnip2	4.71048	ENSMUSG00000036241	Ube2r2	2.39994
ENSMUSG00000040447	Spns2	3.7706	ENSMUSG00000038642	Ctss	10.3293	ENSMUSG00000040592	Cd79b	5.53659	ENSMUSG00000029082	Bst1	44	ENSMUSG00000061576	Dpp6	2.85388	ENSMUSG00000036264	Fstl4	2.78138
ENSMUSG00000040525	Cblc	5.01002	ENSMUSG00000038668	Lpar1	10.5564	ENSMUSG00000040605	Bace2	39.5769	ENSMUSG00000029096	Htra3	2.50266	ENSMUSG00000062098	Btbd3	3.90857	ENSMUSG00000036275	9530068E07Rik	2.15561
ENSMUSG00000040548	Tex2	8.1515	ENSMUSG00000038745	Nlrp6	5.12291	ENSMUSG00000040613	Apobec1	7.82967	ENSMUSG00000029119	Man2b2	2.39459	ENSMUSG00000062257	Opcml	9.7459	ENSMUSG00000036295	Lrrn3	13.8526
ENSMUSG00000040592	Cd79b	5.26829	ENSMUSG00000038781	Stap2	2.44148	ENSMUSG00000040688	Tbl3	2.22398	ENSMUSG00000029156	Sgcb	2.55425	ENSMUSG00000062488	Ifit3b	5.27083	ENSMUSG00000036306	Lzts1	11.1304
ENSMUSG00000040605	Bace2	31.6401	ENSMUSG00000038807	Rap1gap2	3.24065	ENSMUSG00000040694	Apobec2	1162.28	ENSMUSG00000029163	Emilin1	2.19189	ENSMUSG00000062545	Tlr12	4.74	ENSMUSG00000036334	Igsf10	2.42824
ENSMUSG00000040613	Apobec1	14.1648	ENSMUSG00000038879	Nipal2	3.43284	ENSMUSG00000040701	Ap1g2	2.05181	ENSMUSG00000029168	Dpysl5	4.38281	ENSMUSG00000062611	Rps3a2	3.15625	ENSMUSG00000036372	Tmem258	3.40314
ENSMUSG00000040624	Plekhg1	2.39217	ENSMUSG00000038963	Slco4a1	27.054	ENSMUSG00000040722	Scamp5	3.61616	ENSMUSG00000029185	Fam114a1	2.49153	ENSMUSG00000062929	Cfl2	2.20891	ENSMUSG00000036381	P2ry14	3.97267
ENSMUSG00000040694	Apobec2	1345.71	ENSMUSG00000039157	Fam102a	2.79859	ENSMUSG00000040734	Ppp1r13l	2.28891	ENSMUSG00000029233	Srd5a3	3.05363	ENSMUSG00000062991	Nrg1	3.69291	ENSMUSG00000036412	Arsi	10.822
ENSMUSG00000040722	Scamp5	5.14141	ENSMUSG00000039168	Dap	2.72583	ENSMUSG00000040860	Crocc	5.93143	ENSMUSG00000029298	Gbp9	3.22715	ENSMUSG00000063011	Msln	15.4769	ENSMUSG00000036446	Lum	4.09847
ENSMUSG00000040734	Ppp1r13l	2.5308	ENSMUSG00000039193	Nlrc4	66.4091	ENSMUSG00000040883	Tmem205	2.32778	ENSMUSG00000029334	Prkg2	13.1842	ENSMUSG00000063415	Cyp26b1	5.19091	ENSMUSG00000036523	Greb1	12.9021
ENSMUSG00000040860	Crocc	3.26514	ENSMUSG00000039195	1110008P14Rik	2.96478	ENSMUSG00000040969	Arhgef38	2.10912	ENSMUSG00000029377	Ereg	67.625	ENSMUSG00000063430	Wscd2	2.78142	ENSMUSG00000036545	Adamts2	23.3081
ENSMUSG00000041084	Ostc	2.44544	ENSMUSG00000039208	Metrnl	2.46828	ENSMUSG00000041084	Ostc	2.28849	ENSMUSG00000029379	Cxcl3	13400	ENSMUSG00000063687	Pcdhb5	3.2451	ENSMUSG00000036560	Lgi4	2.16201
ENSMUSG00000041119	Pde9a	2.88772	ENSMUSG00000039304	Tnfsf10	2.18617	ENSMUSG00000041119	Pde9a	4.69123	ENSMUSG00000029380	Cxcl1	3.88556	ENSMUSG00000063904	Dpp3	2.61889	ENSMUSG00000036564	Ndrg4	4.11458
ENSMUSG00000041161	Otud3	3.28169	ENSMUSG00000039364	Sectm1b	2.62454	ENSMUSG00000041293	Adgrf1	7.73684	ENSMUSG00000029381	Shroom3	6.33803	ENSMUSG00000064080	Fbln2	10.9528	ENSMUSG00000036565	Ttyh3	3.10072
ENSMUSG00000041293	Adgrf1	13.8947	ENSMUSG00000039372	March4	18.5161	ENSMUSG00000041301	Cftr	3.36442	ENSMUSG00000029413	Naaa	2.2151	ENSMUSG00000064267	Hvcn1	2.34873	ENSMUSG00000036596	Cpz	22.6333
ENSMUSG00000041301	Cftr	5.08002	ENSMUSG00000039450	Dcxr	2.86909	ENSMUSG00000041390	Mdfic	3.64046	ENSMUSG00000029419	Gm996	3.20792	ENSMUSG00000064342	mt-Ti	2.16008	ENSMUSG00000036632	Alg5	2.32246
ENSMUSG00000041355	Ssr2	2.02184	ENSMUSG00000039474	Wfs1	2.88773	ENSMUSG00000041420	Meis3	5.45349	ENSMUSG00000029426	Scarb2	3.00825	ENSMUSG00000064372	mt-Tp	4.78626	ENSMUSG00000036751	Cox6b1	2.6264
ENSMUSG00000041420	Meis3	4.72093	ENSMUSG00000039481	Nrtn	6.38514	ENSMUSG00000041444	Arhgap32	2.81867	ENSMUSG00000029428	Stx2	2.33196	ENSMUSG00000066026	Dhrs3	3.67141	ENSMUSG00000036777	Anln	11.9848
ENSMUSG00000041444	Arhgap32	3.02017	ENSMUSG00000039616	Mocos	4.65368	ENSMUSG00000041605	5730559C18Rik	3.47401	ENSMUSG00000029436	Mmp17	3.90379	ENSMUSG00000066829	Zfp810	4.90667	ENSMUSG00000036880	Acaa2	3.26717
ENSMUSG00000041605	5730559C18Rik	3.28094	ENSMUSG00000039678	Tbc1d13	2.96797	ENSMUSG00000041607	Mbp	2.27149	ENSMUSG00000029484	Anxa3	16.0602	ENSMUSG00000067071	Hes6	4.3253	ENSMUSG00000036908	Unc93b1	3.98058
ENSMUSG00000041607	Mbp	2.20475	ENSMUSG00000039682	Lap3	2.04371	ENSMUSG00000041654	Slc39a11	3.82493	ENSMUSG00000029516	Cit	3.01316	ENSMUSG00000067158	Col4a4	2.8587	ENSMUSG00000037005	Xpnpep2	18.5464
ENSMUSG00000041609	Ccdc64	5	ENSMUSG00000039697	Ncoa7	5.21386	ENSMUSG00000041737	Tmem45b	2.10365	ENSMUSG00000029545	Acads	2.41447	ENSMUSG00000067203	H2-K2	2.59867	ENSMUSG00000037035	Inhbb	24.9003
ENSMUSG00000041654	Slc39a11	3.37401	ENSMUSG00000039747	Orai2	3.46948	ENSMUSG00000041827	Oasl1	33.4302	ENSMUSG00000029561	Oasl2	4.24761	ENSMUSG00000067212	H2-T23	3.02895	ENSMUSG00000037049	Smpd1	3.57595
ENSMUSG00000041737	Tmem45b	4.97433	ENSMUSG00000039774	Galnt12	7.11972	ENSMUSG00000041870	Ankrd13a	2.45548	ENSMUSG00000029598	Plbd2	3.74677	ENSMUSG00000067780	Pi15	3.57414	ENSMUSG00000037060	Prkcdbp	3.09825
ENSMUSG00000041782	Lad1	2.50575	ENSMUSG00000039835	Nhsl1	2.00323	ENSMUSG00000041895	Wipi1	3.27993	ENSMUSG00000029632	Ndufa4	6.03676	ENSMUSG00000067924	Cxx1b	2.03182	ENSMUSG00000037062	Sh3glb1	2.16354
ENSMUSG00000041827	Oasl1	54.7326	ENSMUSG00000039887	Alg14	2.22936	ENSMUSG00000041920	Slc16a6	3.26709	ENSMUSG00000029649	Pomp	2.18596	ENSMUSG00000068122	Agtr2	61.2903	ENSMUSG00000037071	Scd1	2.91027
ENSMUSG00000041836	Ptpre	8.1457	ENSMUSG00000039954	Stk32a	10.5349	ENSMUSG00000041926	Rnpep	3.04008	ENSMUSG00000029661	Col1a2	12.9358	ENSMUSG00000068196	Col8a1	4.11746	ENSMUSG00000037072	Selenof	2.37018
ENSMUSG00000041870	Ankrd13a	2.56207	ENSMUSG00000039997	Ifi203	14.4557	ENSMUSG00000042157	Sprr2i	17.25	ENSMUSG00000029674	Limk1	2.20435	ENSMUSG00000068263	Efcc1	4.2037	ENSMUSG00000037151	Lrrc20	3.43077
ENSMUSG00000041926	Rnpep	3.43884	ENSMUSG00000040033	Stat2	2.34303	ENSMUSG00000042212	Sprr2d	49.9073	ENSMUSG00000029675	Eln	11.4344	ENSMUSG00000068587	Mgam	25.6667	ENSMUSG00000037225	Fgf2	4.16723
ENSMUSG00000042157	Sprr2i	40.125	ENSMUSG00000040105	Plpp6	2.32298	ENSMUSG00000042216	Sgsm1	9	ENSMUSG00000029718	Pcolce	12.833	ENSMUSG00000068749	Psma5	2.03971	ENSMUSG00000037306	Man1c1	2.28173
ENSMUSG00000042212	Sprr2d	110.053	ENSMUSG00000040188	Scamp2	2.32007	ENSMUSG00000042228	Lyn	4.83966	ENSMUSG00000029759	Pon3	4.83019	ENSMUSG00000068758	Il3ra	5.42105	ENSMUSG00000037348	Paqr7	3.32394
ENSMUSG00000042216	Sgsm1	22.5422	ENSMUSG00000040289	Hey1	2.32459	ENSMUSG00000042229	Rabif	2.24771	ENSMUSG00000029765	Plxna4	23.9026	ENSMUSG00000069763	Tmem100	4.28571	ENSMUSG00000037366	Pafah2	3.40645
ENSMUSG00000042228	Lyn	4.55383	ENSMUSG00000040296	Ddx58	2.54474	ENSMUSG00000042246	Tmc7	3.32075	ENSMUSG00000029771	Irf5	3.03373	ENSMUSG00000069920	B3gnt9	2.78879	ENSMUSG00000037379	Spon2	13.455
ENSMUSG00000042268	Slc26a9	4.47246	ENSMUSG00000040322	Slc25a24	2.98413	ENSMUSG00000042303	Sgsm3	4.4474	ENSMUSG00000029798	Herc6	2.15603	ENSMUSG00000070327	Rnf213	2.36557	ENSMUSG00000037613	Tnfrsf23	5.36792
ENSMUSG00000042303	Sgsm3	3.77471	ENSMUSG00000040356	Skiv2l	3.20368	ENSMUSG00000042460	C1galt1	3.00412	ENSMUSG00000029810	Tmem176b	7.99625	ENSMUSG00000070436	Serpinh1	3.11993	ENSMUSG00000037624	Kcnk2	6.72977
ENSMUSG00000042331	Specc1	2.90423	ENSMUSG00000040364	Sec1	5.84076	ENSMUSG00000042492	Tbc1d10b	2.20592	ENSMUSG00000029811	Aoc1	122.438	ENSMUSG00000070866	Zfp804a	5.59813	ENSMUSG00000037710	Cisd1	3.72917
ENSMUSG00000042349	Ikbke	2.50614	ENSMUSG00000040447	Spns2	2.853	ENSMUSG00000042734	Ttc9	4.77924	ENSMUSG00000029847	Slc23a4	22.375	ENSMUSG00000070867	Trabd2b	2.8875	ENSMUSG00000037731	Themis2	11.0909
ENSMUSG00000042460	C1galt1	2.88054	ENSMUSG00000040479	Dgkz	2.18852	ENSMUSG00000042759	Apobr	5.61081	ENSMUSG00000029869	Ephb6	3.22986	ENSMUSG00000071265	1700086L19Rik	4.13542	ENSMUSG00000037816	Fbxw17	7.37759
ENSMUSG00000042492	Tbc1d10b	3.22476	ENSMUSG00000040482	Dxo	2.38141	ENSMUSG00000042784	Muc1	3.16592	ENSMUSG00000029878	Dbpht2	4.38889	ENSMUSG00000071547	Nt5dc2	3.06283	ENSMUSG00000037852	Cpe	4.34507
ENSMUSG00000042677	Zc3h12a	3.39036	ENSMUSG00000040483	Xaf1	2.9305	ENSMUSG00000043067	Dpy19l1	3.89189	ENSMUSG00000029918	Mrps33	2.39394	ENSMUSG00000071604	Fam189a2	2.2523	ENSMUSG00000037872	Ackr1	2.76301
ENSMUSG00000042688	Mapk6	2.5741	ENSMUSG00000040525	Cblc	5.2621	ENSMUSG00000043165	Lor	28.9326	ENSMUSG00000029994	Anxa4	2.14298	ENSMUSG00000071984	Fndc1	4.30688	ENSMUSG00000037946	Fgd3	24.3571
ENSMUSG00000042734	Ttc9	5.82654	ENSMUSG00000040548	Tex2	5.91872	ENSMUSG00000043311	D17H6S53E	4.09375	ENSMUSG00000030069	Prok2	8.13333	ENSMUSG00000072720	Myo18b	50.214	ENSMUSG00000037960	Card19	2.412
ENSMUSG00000042759	Apobr	10.3081	ENSMUSG00000040605	Bace2	26.4835	ENSMUSG00000043333	Rhbdl2	9.09483	ENSMUSG00000030111	A2m	73.7143	ENSMUSG00000072941	Sod3	4.06496	ENSMUSG00000037966	Ninj1	2.05979
ENSMUSG00000042772	Smg7	2.14668	ENSMUSG00000040613	Apobec1	9.47253	ENSMUSG00000043445	Pgp	7.25175	ENSMUSG00000030162	Olr1	192.4	ENSMUSG00000073274	Gm14636	4.18207	ENSMUSG00000038074	Fkbp14	4.1878
ENSMUSG00000042784	Muc1	3.66469	ENSMUSG00000040663	Clcf1	2.2318	ENSMUSG00000043535	Setx	2.13615	ENSMUSG00000030170	Wnt5b	2.80428	ENSMUSG00000073403	Gm10499	4.17992	ENSMUSG00000038156	Spon1	13.2846
ENSMUSG00000043067	Dpy19l1	3.35872	ENSMUSG00000040688	Tbl3	2.0448	ENSMUSG00000043592	Unc5cl	150.811	ENSMUSG00000030209	Grin2b	5.08621	ENSMUSG00000073418	C4b	4.7887	ENSMUSG00000038178	Slc43a2	3.5807
ENSMUSG00000043165	Lor	3.56995	ENSMUSG00000040694	Apobec2	1067.47	ENSMUSG00000043621	Ubxn10	4.18852	ENSMUSG00000030220	Arhgdib	28.6034	ENSMUSG00000073643	Wdfy1	2.2509	ENSMUSG00000038181	Chpf2	2.22609
ENSMUSG00000043311	D17H6S53E	2.77083	ENSMUSG00000040722	Scamp5	6.78788	ENSMUSG00000043753	Dmrta1	8.28889	ENSMUSG00000030222	Rerg	7.19507	ENSMUSG00000073650	Catip	5.35	ENSMUSG00000038239	Hrc	4.04762
ENSMUSG00000043333	Rhbdl2	10.5776	ENSMUSG00000040883	Tmem205	2.2	ENSMUSG00000043873	Chil5	8.5283	ENSMUSG00000030254	Rad18	3.38636	ENSMUSG00000073679	Mxra8os	3.75621	ENSMUSG00000038311	2410017I17Rik	3.56897
ENSMUSG00000043445	Pgp	5.62937	ENSMUSG00000040969	Arhgef38	2.58738	ENSMUSG00000044026	Slc35g1	5.05263	ENSMUSG00000030340	Scnn1a	6.32955	ENSMUSG00000074207	Adh1	8.76651	ENSMUSG00000038312	Edem2	2.84158
ENSMUSG00000043557	Mdga1	17.1306	ENSMUSG00000041084	Ostc	3.11211	ENSMUSG00000044103	Il1f9	44	ENSMUSG00000030465	Psd3	3.31916	ENSMUSG00000074345	Tnfaip8l3	4.58974	ENSMUSG00000038352	Arl5c	3.47826
ENSMUSG00000043592	Unc5cl	103.233	ENSMUSG00000041119	Pde9a	2.79298	ENSMUSG00000044162	Tnip3	62.82	ENSMUSG00000030494	Rhpn2	6.99051	ENSMUSG00000074676	Foxs1	3.53968	ENSMUSG00000038372	Gmds	3.23629
ENSMUSG00000043753	Dmrta1	6.9	ENSMUSG00000041161	Otud3	3.25704	ENSMUSG00000044165	Bcl2l15	14.9838	ENSMUSG00000030513	Pcsk6	4.42708	ENSMUSG00000074813	Gm14005	9.5	ENSMUSG00000038375	Trp53inp2	3.38489
ENSMUSG00000044026	Slc35g1	4.31424	ENSMUSG00000041293	Adgrf1	15.8947	ENSMUSG00000044217	Aqp5	8.90639	ENSMUSG00000030538	Cib1	4.55	ENSMUSG00000074896	Ifit3	7.55066	ENSMUSG00000038400	Pmepa1	4.4871
ENSMUSG00000044103	Il1f9	125.967	ENSMUSG00000041301	Cftr	5.30973	ENSMUSG00000044244	Il20rb	3.076	ENSMUSG00000030560	Ctsc	5.08103	ENSMUSG00000074971	Fibin	5.97778	ENSMUSG00000038429	Usp5	2.62303
ENSMUSG00000044162	Tnip3	146.91	ENSMUSG00000041355	Ssr2	2.47209	ENSMUSG00000044252	Osbpl1a	3.37855	ENSMUSG00000030591	Psmd8	2.33287	ENSMUSG00000075010	AW112010	2.30978	ENSMUSG00000038456	Dennd2a	2.57148
ENSMUSG00000044165	Bcl2l15	19.5135	ENSMUSG00000041420	Meis3	4.66279	ENSMUSG00000044294	Krt84	157.961	ENSMUSG00000030605	Mfge8	2.84352	ENSMUSG00000075593	Gal3st4	3.73077	ENSMUSG00000038457	Tmem255b	8.47131
ENSMUSG00000044217	Aqp5	6.72603	ENSMUSG00000041444	Arhgap32	2.61349	ENSMUSG00000044337	Ackr3	6.2583	ENSMUSG00000030607	Acan	9.08571	ENSMUSG00000075602	Ly6a	7.23829	ENSMUSG00000038463	Olfml2b	2.96825
ENSMUSG00000044294	Krt84	242.412	ENSMUSG00000041449	Serpina3h	5.94444	ENSMUSG00000044461	Shisa2	21.9505	ENSMUSG00000030621	Me3	8.02799	ENSMUSG00000077391	Gm24336	2.088	ENSMUSG00000038628	Polr3k	2.3855
ENSMUSG00000044313	Mab21l3	2.86138	ENSMUSG00000041481	Serpina3g	8.04955	ENSMUSG00000044496	2510039O18Rik	2.97043	ENSMUSG00000030623	Prss23os	12.6862	ENSMUSG00000078117	Gm16485	2.86675	ENSMUSG00000038729	Akap2	2.18146
ENSMUSG00000044393	Dsg2	2.90799	ENSMUSG00000041605	5730559C18Rik	3.22525	ENSMUSG00000044626	Liph	5.65517	ENSMUSG00000030630	Fah	4.94576	ENSMUSG00000078190	Dnm3os	2.13709	ENSMUSG00000038732	Mboat1	2.37411
ENSMUSG00000044461	Shisa2	15.099	ENSMUSG00000041607	Mbp	2.59729	ENSMUSG00000044716	Dok7	4.57447	ENSMUSG00000030647	Ndufc2	2.77586	ENSMUSG00000078502	Gm13212	2.97026	ENSMUSG00000038738	Shank1	3.0996
ENSMUSG00000044496	2510039O18Rik	3.10536	ENSMUSG00000041609	Ccdc64	3.4055	ENSMUSG00000044734	Serpinb1a	3.03675	ENSMUSG00000030682	Cdipt	2.31586	ENSMUSG00000078532	Nkain1	4.82692	ENSMUSG00000038776	Ephx1	2.5417
ENSMUSG00000044628	Rnf208	2.10219	ENSMUSG00000041654	Slc39a11	3.98939	ENSMUSG00000044770	Scml4	13.8427	ENSMUSG00000030688	Stard10	3.09642	ENSMUSG00000078612	1700024P16Rik	6.50829	ENSMUSG00000038803	Ost4	2.06273
ENSMUSG00000044734	Serpinb1a	3.49344	ENSMUSG00000041736	Tspo	2.37678	ENSMUSG00000044827	Tlr1	2.35915	ENSMUSG00000030717	Nupr1	4.61069	ENSMUSG00000078713	Tomm5	2.5	ENSMUSG00000038811	Gngt2	4.32759
ENSMUSG00000044770	Scml4	7.0824	ENSMUSG00000041737	Tmem45b	3.55183	ENSMUSG00000044912	Syt16	23.6763	ENSMUSG00000030727	Rabep2	2.68531	ENSMUSG00000079017	Ifi27l2a	18.9062	ENSMUSG00000039004	Bmp6	9.52778
ENSMUSG00000044827	Tlr1	2.15493	ENSMUSG00000041782	Lad1	2.70687	ENSMUSG00000044976	Wdr72	29.5526	ENSMUSG00000030739	Myh14	12.8879	ENSMUSG00000079018	Ly6c1	9.07065	ENSMUSG00000039007	Cpq	2.52252
ENSMUSG00000044912	Syt16	39.8601	ENSMUSG00000041827	Oasl1	51.4651	ENSMUSG00000045211	Nudt18	2.40678	ENSMUSG00000030748	Il4ra	2.77026	ENSMUSG00000079138	Gm8818	4.95455	ENSMUSG00000039031	Arhgap18	6.48266
ENSMUSG00000044976	Wdr72	30.7368	ENSMUSG00000041836	Ptpre	5.99779	ENSMUSG00000045316	Fahd1	2.75676	ENSMUSG00000030780	BC017158	3.80509	ENSMUSG00000079157	Fam155a	3.24719	ENSMUSG00000039047	Pigk	2.37627
ENSMUSG00000045176	Borcs6	2.76866	ENSMUSG00000041870	Ankrd13a	2.48887	ENSMUSG00000045364	Ifne	6.95575	ENSMUSG00000030781	Slc5a2	3.31982	ENSMUSG00000079355	Ackr4	3.37838	ENSMUSG00000039058	Ak5	10.4667
ENSMUSG00000045349	Sh2d5	6.25143	ENSMUSG00000041886	Macc1	2.31602	ENSMUSG00000045374	Wdr81	3.96787	ENSMUSG00000030786	Itgam	17.9583	ENSMUSG00000079362	Gm43302	2.23617	ENSMUSG00000039230	Tbcd	2.19235
ENSMUSG00000045364	Ifne	10.5929	ENSMUSG00000041920	Slc16a6	2.24185	ENSMUSG00000045573	Penk	9.39114	ENSMUSG00000030824	Nucb1	2.88481	ENSMUSG00000079465	Col4a3	3.35294	ENSMUSG00000039239	Tgfb2	3.77912
ENSMUSG00000045374	Wdr81	3.28916	ENSMUSG00000041926	Rnpep	4.17107	ENSMUSG00000045594	Glb1	3.04558	ENSMUSG00000030844	Rgs10	5.9	ENSMUSG00000079484	Phyhd1	3.38629	ENSMUSG00000039246	Lyplal1	2.488
ENSMUSG00000045502	Hcar2	3.48317	ENSMUSG00000041945	Mfsd9	2.86916	ENSMUSG00000045629	Sh3tc2	3.89024	ENSMUSG00000030854	Ptpn5	43.439	ENSMUSG00000079492	Gm11127	3.8	ENSMUSG00000039252	Lgi2	13.9407
ENSMUSG00000045594	Glb1	2.47578	ENSMUSG00000042157	Sprr2i	12.7188	ENSMUSG00000045659	Plekha7	2.66711	ENSMUSG00000030872	Gga2	2.84175	ENSMUSG00000079620	Muc4	14	ENSMUSG00000039254	Pomt1	4.57599
ENSMUSG00000045664	Cdc42ep2	7.87349	ENSMUSG00000042212	Sprr2d	46.6026	ENSMUSG00000045664	Cdc42ep2	6.0994	ENSMUSG00000030889	Vwa3a	21.375	ENSMUSG00000081223	Gm12247	5.89583	ENSMUSG00000039257	Vstm2b	13.8036
ENSMUSG00000045730	Adrb2	2.0591	ENSMUSG00000042216	Sgsm1	20.2369	ENSMUSG00000045665	Mfsd5	2.45255	ENSMUSG00000030894	Tpp1	2.08309	ENSMUSG00000083382	Gm6433	10.5909	ENSMUSG00000039270	Megf9	2.46597
ENSMUSG00000045763	Basp1	35.1034	ENSMUSG00000042225	Ammecr1	2.01085	ENSMUSG00000045763	Basp1	26.3379	ENSMUSG00000030921	Trim30a	2.48352	ENSMUSG00000084523	Mir1903	3.06962	ENSMUSG00000039294	BC017643	2.05791
ENSMUSG00000045776	Lrtm1	35.6643	ENSMUSG00000042228	Lyn	4.65995	ENSMUSG00000045776	Lrtm1	22.0779	ENSMUSG00000030986	Dhx32	3.13224	ENSMUSG00000084783	Gm15419	4.16477	ENSMUSG00000039357	Fut11	2.86
ENSMUSG00000045838	A430105I19Rik	3.07186	ENSMUSG00000042268	Slc26a9	4.68986	ENSMUSG00000045838	A430105I19Rik	4.47904	ENSMUSG00000031004	Mki67	7.26519	ENSMUSG00000084934	Gm16035	12.4762	ENSMUSG00000039405	Prss23	12.7903
ENSMUSG00000045868	Gvin1	17.9298	ENSMUSG00000042303	Sgsm3	4.04038	ENSMUSG00000045868	Gvin1	7.2807	ENSMUSG00000031070	Mrgprf	3.005	ENSMUSG00000084970	1700060J05Rik	2.21963	ENSMUSG00000039452	Snx22	2.74545
ENSMUSG00000045917	Tmem268	4.32075	ENSMUSG00000042331	Specc1	2.29272	ENSMUSG00000045917	Tmem268	8.54717	ENSMUSG00000031089	Slc6a14	7.74074	ENSMUSG00000085227	6330418K02Rik	3.77215	ENSMUSG00000039474	Wfs1	2.54969
ENSMUSG00000046352	Gjb2	3.18779	ENSMUSG00000042349	Ikbke	2.30645	ENSMUSG00000046027	Stard5	2.75182	ENSMUSG00000031093	Dock11	3.33308	ENSMUSG00000085526	Gm16083	2.40254	ENSMUSG00000039476	Prrx2	4.65877
ENSMUSG00000046402	Rbp1	8.11613	ENSMUSG00000042460	C1galt1	3.01699	ENSMUSG00000046352	Gjb2	5.01174	ENSMUSG00000031103	Elf4	3.05053	ENSMUSG00000085560	C230038L03Rik	4.58772	ENSMUSG00000039497	Dse	2.65347
ENSMUSG00000046410	Kcnk6	2.5	ENSMUSG00000042492	Tbc1d10b	3.05922	ENSMUSG00000046402	Rbp1	5.76774	ENSMUSG00000031112	Stk26	21.9799	ENSMUSG00000085766	2810430I11Rik	5.75992	ENSMUSG00000039519	Cyp7b1	3.23267
ENSMUSG00000046449	C77370	12.9279	ENSMUSG00000042677	Zc3h12a	3.42968	ENSMUSG00000046410	Kcnk6	2.11628	ENSMUSG00000031119	Gpc4	2.53961	ENSMUSG00000086083	Gm15829	3.024	ENSMUSG00000039578	Ccser1	19.5
ENSMUSG00000046598	Bdh1	7.18	ENSMUSG00000042688	Mapk6	2.67796	ENSMUSG00000046449	C77370	9.56971	ENSMUSG00000031129	Slc9a9	6.68085	ENSMUSG00000086327	Slfn5os	4.06757	ENSMUSG00000039621	Prex1	3.10285
ENSMUSG00000046694	Fam46b	2.30683	ENSMUSG00000042724	Map3k9	2.05566	ENSMUSG00000046561	Arsj	5.61538	ENSMUSG00000031145	Prickle3	2.65188	ENSMUSG00000086373	Gm11978	11.6244	ENSMUSG00000039683	Sdk1	6.92844
ENSMUSG00000046718	Bst2	5.24752	ENSMUSG00000042734	Ttc9	5.45729	ENSMUSG00000046598	Bdh1	5.42	ENSMUSG00000031146	Plp2	3.02351	ENSMUSG00000086418	Gm13362	2.37209	ENSMUSG00000039697	Ncoa7	2.18995
ENSMUSG00000046722	Cdc42se1	3.63454	ENSMUSG00000042759	Apobr	10.8757	ENSMUSG00000046694	Fam46b	2.71056	ENSMUSG00000031149	Praf2	3.21414	ENSMUSG00000086472	Gm16172	2.62733	ENSMUSG00000039745	Htatip2	5.40816
ENSMUSG00000046733	Gprc5a	4.17752	ENSMUSG00000042784	Muc1	4.51982	ENSMUSG00000046718	Bst2	5.51815	ENSMUSG00000031158	Timm17b	2.35979	ENSMUSG00000086507	Adap2os	7.81081	ENSMUSG00000039747	Orai2	2.34194
ENSMUSG00000046794	Ppp1r3b	2.43103	ENSMUSG00000043067	Dpy19l1	3.5774	ENSMUSG00000046722	Cdc42se1	3.65328	ENSMUSG00000031170	Slc38a5	12.2951	ENSMUSG00000086514	Gm11747	3.61603	ENSMUSG00000039787	Cercam	5.83452
ENSMUSG00000046959	Slc26a1	50.275	ENSMUSG00000043311	D17H6S53E	3.375	ENSMUSG00000046794	Ppp1r3b	2.89655	ENSMUSG00000031209	Heph	8.92723	ENSMUSG00000086537	Nespas	7.45946	ENSMUSG00000039798	2600006K01Rik	5.40678
ENSMUSG00000047117	Ankdd1b	3.84375	ENSMUSG00000043333	Rhbdl2	6.98276	ENSMUSG00000046959	Slc26a1	17.0893	ENSMUSG00000031230	Fgf16	57.1072	ENSMUSG00000086560	Gm13372	7.35172	ENSMUSG00000039842	Mcph1	2.34328
ENSMUSG00000047139	Cd24a	2.87838	ENSMUSG00000043445	Pgp	5.59441	ENSMUSG00000047139	Cd24a	2.37695	ENSMUSG00000031231	Cox7b	3.61538	ENSMUSG00000086843	E030013I19Rik	4.18033	ENSMUSG00000039887	Alg14	2.2972
ENSMUSG00000047150	1700001C19Rik	3.13061	ENSMUSG00000043541	Casc1	2.26129	ENSMUSG00000047228	BC048546	3.18333	ENSMUSG00000031239	Itm2a	19.3835	ENSMUSG00000086962	Gm12248	5.49554	ENSMUSG00000040111	Gramd1b	4.21567
ENSMUSG00000047230	Cldn2	48.0417	ENSMUSG00000043592	Unc5cl	80.7556	ENSMUSG00000047230	Cldn2	121.25	ENSMUSG00000031253	Srpx2	11.1212	ENSMUSG00000086998	Gm16033	3.10227	ENSMUSG00000040136	Abcc8	20.3571
ENSMUSG00000047501	Cldn4	3.13065	ENSMUSG00000043753	Dmrta1	5.34444	ENSMUSG00000047388	Atmin	2.42672	ENSMUSG00000031284	Pak3	7.92887	ENSMUSG00000087141	Plcxd2	3.09901	ENSMUSG00000040158	Tax1bp3	2.11616
ENSMUSG00000047641	Krt87	5.09821	ENSMUSG00000044026	Slc35g1	4.97988	ENSMUSG00000047641	Krt87	5.98512	ENSMUSG00000031286	Glt28d2	6.85714	ENSMUSG00000087261	Gm15477	2.61364	ENSMUSG00000040212	Emp3	2.95588
ENSMUSG00000047654	Tssk6	2.5625	ENSMUSG00000044103	Il1f9	134.2	ENSMUSG00000047654	Tssk6	2.25	ENSMUSG00000031342	Gpm6b	2.9861	ENSMUSG00000087302	Sox5os1	3.22523	ENSMUSG00000040249	Lrp1	2.304
ENSMUSG00000047730	Fcgbp	19.668	ENSMUSG00000044162	Tnip3	122.57	ENSMUSG00000047730	Fcgbp	38.2567	ENSMUSG00000031351	Zfp185	2.59408	ENSMUSG00000087400	Gm15270	4.34896	ENSMUSG00000040280	Ndufa4l2	3.74648
ENSMUSG00000047731	Wbp1l	2.01067	ENSMUSG00000044165	Bcl2l15	9.14595	ENSMUSG00000047731	Wbp1l	2.56158	ENSMUSG00000031364	Grpr	71.5	ENSMUSG00000087500	Gm12426	4.6	ENSMUSG00000040296	Ddx58	2.1148
ENSMUSG00000047735	Samd9l	3.28425	ENSMUSG00000044217	Aqp5	7.16438	ENSMUSG00000047735	Samd9l	3.18619	ENSMUSG00000031380	Vegfd	6.8191	ENSMUSG00000087545	Gm13966	2.43373	ENSMUSG00000040372	Gpr63	2.3945
ENSMUSG00000047751	Utf1	10850	ENSMUSG00000044294	Krt84	78.1569	ENSMUSG00000047797	Gjb1	3.27419	ENSMUSG00000031400	G6pdx	2.46315	ENSMUSG00000087607	Gm16034	3.7033	ENSMUSG00000040374	Pex2	2.17
ENSMUSG00000047810	Ccdc88b	171.464	ENSMUSG00000044313	Mab21l3	3.21631	ENSMUSG00000047810	Ccdc88b	118.821	ENSMUSG00000031429	Psmd10	5.83051	ENSMUSG00000087674	4930447M23Rik	7.96154	ENSMUSG00000040447	Spns2	9.68421
ENSMUSG00000048163	Selplg	21.3256	ENSMUSG00000044393	Dsg2	3.32871	ENSMUSG00000047878	A4galt	2.84309	ENSMUSG00000031451	Gas6	6.79528	ENSMUSG00000087698	Gm13031	21.2308	ENSMUSG00000040483	Xaf1	2.31579
ENSMUSG00000048307	Ankrd46	2.60503	ENSMUSG00000044461	Shisa2	16.5545	ENSMUSG00000048163	Selplg	8.04651	ENSMUSG00000031488	Rab11fip1	3.52941	ENSMUSG00000089635	Gm16559	8.36877	ENSMUSG00000040543	Pitpnm3	4.79545
ENSMUSG00000048482	Bdnf	7	ENSMUSG00000044496	2510039O18Rik	3.31423	ENSMUSG00000048307	Ankrd46	3.62642	ENSMUSG00000031502	Col4a1	5.95448	ENSMUSG00000089832	Shkbp1	4.05556	ENSMUSG00000040548	Tex2	2.25572
ENSMUSG00000048534	Amica1	5.90667	ENSMUSG00000044734	Serpinb1a	4.44094	ENSMUSG00000048534	Amica1	4.32	ENSMUSG00000031503	Col4a2	6.45721	ENSMUSG00000090084	Srpx	3.23604	ENSMUSG00000040562	Gstm2	3.55593
ENSMUSG00000048644	Ctxn1	2.15608	ENSMUSG00000044770	Scml4	6.64794	ENSMUSG00000048707	Tprn	3.688	ENSMUSG00000031517	Gpm6a	46.3205	ENSMUSG00000090210	Itga10	3.70219	ENSMUSG00000040569	Slc26a7	8.29167
ENSMUSG00000048707	Tprn	3.4304	ENSMUSG00000044827	Tlr1	2.65493	ENSMUSG00000048939	Atp13a5	23.9615	ENSMUSG00000031519	Asb5	2.01136	ENSMUSG00000090222	Ifi203-ps	5.048	ENSMUSG00000040605	Bace2	28.9906
ENSMUSG00000048939	Atp13a5	9.34615	ENSMUSG00000044912	Syt16	35.2647	ENSMUSG00000048970	C1galt1c1	3.58117	ENSMUSG00000031521	Aga	2.96618	ENSMUSG00000090272	Mndal	4.22294	ENSMUSG00000040690	Col16a1	2.41683
ENSMUSG00000048970	C1galt1c1	2.19805	ENSMUSG00000044976	Wdr72	26.6316	ENSMUSG00000048988	Elfn1	14.3032	ENSMUSG00000031562	Dctd	5.42045	ENSMUSG00000090946	Ccdc71l	2.16207	ENSMUSG00000040701	Ap1g2	2.23372
ENSMUSG00000048988	Elfn1	13.0774	ENSMUSG00000045176	Borcs6	3.1791	ENSMUSG00000049086	Bmyc	2.81233	ENSMUSG00000031613	Hpgd	8.75483	ENSMUSG00000090958	Lrrc32	2.34545	ENSMUSG00000040722	Scamp5	2.35433
ENSMUSG00000048992	Prss32	25.2414	ENSMUSG00000045349	Sh2d5	5.22286	ENSMUSG00000049091	Sephs2	3.43669	ENSMUSG00000031634	Ufsp2	2.51667	ENSMUSG00000091243	Vgll3	3.33833	ENSMUSG00000040808	S100g	57.5769
ENSMUSG00000049086	Bmyc	2.27614	ENSMUSG00000045364	Ifne	7.17699	ENSMUSG00000049299	Trappc1	3.77848	ENSMUSG00000031672	Got2	2.1126	ENSMUSG00000091345	Col6a5	7.09804	ENSMUSG00000040811	Eml2	5.30528
ENSMUSG00000049299	Trappc1	2.48734	ENSMUSG00000045374	Wdr81	3.31928	ENSMUSG00000049305	Ccdc71	2.07311	ENSMUSG00000031767	Nudt7	4.94545	ENSMUSG00000091549	Gm6548	2.21429	ENSMUSG00000040829	Zmynd15	21.0341
ENSMUSG00000049493	Pls1	8.97187	ENSMUSG00000045502	Hcar2	4.30099	ENSMUSG00000049493	Pls1	9.32992	ENSMUSG00000031782	Coq9	2.67097	ENSMUSG00000092071	A230065N10Rik	7.85	ENSMUSG00000040867	Begain	3.27586
ENSMUSG00000049502	Dtx3l	2.1139	ENSMUSG00000045594	Glb1	3.77493	ENSMUSG00000049502	Dtx3l	2.19682	ENSMUSG00000031785	Adgrg1	11.1548	ENSMUSG00000092200	Tnxa	2.17143	ENSMUSG00000040883	Tmem205	2.22807
ENSMUSG00000049562	Ap5b1	2.91156	ENSMUSG00000045664	Cdc42ep2	7.84036	ENSMUSG00000049717	Lig4	3.54015	ENSMUSG00000031787	Katnb1	2.6562	ENSMUSG00000092511	Gm20547	2.94205	ENSMUSG00000041037	Irgq	2.13613
ENSMUSG00000049686	Orai1	2.79589	ENSMUSG00000045763	Basp1	29.531	ENSMUSG00000049922	Slc35c1	4.90769	ENSMUSG00000031788	Kifc3	8.02677	ENSMUSG00000092981	Mir5125	2.38621	ENSMUSG00000041046	Ramp3	5.21786
ENSMUSG00000049717	Lig4	2.81022	ENSMUSG00000045776	Lrtm1	33.7662	ENSMUSG00000050097	Ces2b	9.22172	ENSMUSG00000031807	Pgls	3.64641	ENSMUSG00000093315	Mir5114	2.55932	ENSMUSG00000041231	Ublcp1	2.34185
ENSMUSG00000049775	Tmsb4x	2.59672	ENSMUSG00000045838	A430105I19Rik	2.69461	ENSMUSG00000050103	Agmo	2.79554	ENSMUSG00000031813	Mvb12a	3.27119	ENSMUSG00000093989	Rnasek	2.17799	ENSMUSG00000041347	Bdkrb1	2.03089
ENSMUSG00000049922	Slc35c1	4.36264	ENSMUSG00000045868	Gvin1	6.12281	ENSMUSG00000050106	Tmc8	3	ENSMUSG00000031824	6430548M08Rik	10.2678	ENSMUSG00000094910	D430019H16Rik	4.31507	ENSMUSG00000041351	Rap1gap	3.49383
ENSMUSG00000050092	Sprr2b	18.3072	ENSMUSG00000045917	Tmem268	3.96226	ENSMUSG00000050138	Kcnk12	26.5556	ENSMUSG00000031825	Crispld2	2.64634	ENSMUSG00000096956	Snhg18	3.07203	ENSMUSG00000041390	Mdfic	2.36069
ENSMUSG00000050097	Ces2b	4.19005	ENSMUSG00000046108	Il17c	3.17886	ENSMUSG00000050272	Dscam	14.2757	ENSMUSG00000031839	Hsbp1	2.20631	ENSMUSG00000097002	Gm2670	9.06522	ENSMUSG00000041481	Serpina3g	2.91473
ENSMUSG00000050138	Kcnk12	26.1111	ENSMUSG00000046352	Gjb2	4.06416	ENSMUSG00000050425	Mrgprb2	38900	ENSMUSG00000031851	Ntpcr	3.42169	ENSMUSG00000097157	Gm26512	3.02642	ENSMUSG00000041540	Sox5	3.36098
ENSMUSG00000050272	Dscam	7.25413	ENSMUSG00000046402	Rbp1	11.9677	ENSMUSG00000050550	Gm11868	2.52252	ENSMUSG00000031870	Pgr	2.90362	ENSMUSG00000097249	Gm26889	2.17305	ENSMUSG00000041650	Pcca	2.74525
ENSMUSG00000050425	Mrgprb2	10950	ENSMUSG00000046410	Kcnk6	2.30233	ENSMUSG00000050627	Gpd1l	3.87825	ENSMUSG00000031877	Ces2g	8.56561	ENSMUSG00000097277	2900076A07Rik	2.91089	ENSMUSG00000041654	Slc39a11	4.92929
ENSMUSG00000050578	Mmp13	166.584	ENSMUSG00000046449	C77370	9.30288	ENSMUSG00000050635	Sprr2f	33.604	ENSMUSG00000031887	Tradd	3.53509	ENSMUSG00000097305	Gm17276	2.73757	ENSMUSG00000041697	Cox6a1	2.05544
ENSMUSG00000050627	Gpd1l	2.80021	ENSMUSG00000046598	Bdh1	6.98	ENSMUSG00000050732	Vamp8	2.65268	ENSMUSG00000031891	Hsd11b2	34.0559	ENSMUSG00000097474	Gm26584	5.84127	ENSMUSG00000041710	Trpc5	27.3636
ENSMUSG00000050635	Sprr2f	42.8169	ENSMUSG00000046718	Bst2	6.30033	ENSMUSG00000050914	Ankrd37	3.46212	ENSMUSG00000031901	Dus2	2.37405	ENSMUSG00000097634	Gm26827	3.57812	ENSMUSG00000041729	Coro2b	7.14208
ENSMUSG00000050732	Vamp8	2.55705	ENSMUSG00000046722	Cdc42se1	3.9759	ENSMUSG00000050994	Adgb	91.6168	ENSMUSG00000031906	Smpd3	50.0603	ENSMUSG00000097815	Gm26809	2.23856	ENSMUSG00000041736	Tspo	4.44507
ENSMUSG00000050747	Trim15	5.94763	ENSMUSG00000046733	Gprc5a	3.04534	ENSMUSG00000051022	Hs3st1	12.1008	ENSMUSG00000031932	Gpr83	30.9167	ENSMUSG00000097906	Gm9625	3.09948	ENSMUSG00000041757	Plekha6	6.53545
ENSMUSG00000050914	Ankrd37	4.03788	ENSMUSG00000046794	Ppp1r3b	2.18391	ENSMUSG00000051147	Nat2	3.90164	ENSMUSG00000031963	Bmper	12.3611	ENSMUSG00000097928	Gm26578	3.2549	ENSMUSG00000041779	Tram2	4.42919
ENSMUSG00000050994	Adgb	43.3134	ENSMUSG00000046959	Slc26a1	28.2357	ENSMUSG00000051238	Swsap1	3.56338	ENSMUSG00000031980	Agt	130.529	ENSMUSG00000097993	Ptprv	10.7037	ENSMUSG00000041794	Myrip	14.7368
ENSMUSG00000051022	Hs3st1	26.1895	ENSMUSG00000047139	Cd24a	3.05267	ENSMUSG00000051246	Msantd1	4.34409	ENSMUSG00000031983	2310022B05Rik	3.12371	ENSMUSG00000098204	Gm26984	2.7868	ENSMUSG00000041797	Abca9	2.81948
ENSMUSG00000051147	Nat2	3.80328	ENSMUSG00000047150	1700001C19Rik	2.81224	ENSMUSG00000051256	Jagn1	2.97308	ENSMUSG00000031997	Trpc6	11.8375	ENSMUSG00000098465	Mir1668	8.9878	ENSMUSG00000041889	Shisa4	4.32812
ENSMUSG00000051375	Pcdh1	4.50564	ENSMUSG00000047230	Cldn2	46.125	ENSMUSG00000051375	Pcdh1	4.07199	ENSMUSG00000032026	Rexo2	3.11111	ENSMUSG00000098666	Mir6950	10.0312	ENSMUSG00000041891	Lman1	2.52736
ENSMUSG00000051412	Vamp7	2.23981	ENSMUSG00000047501	Cldn4	2.85534	ENSMUSG00000051412	Vamp7	2.6259	ENSMUSG00000032051	Fdx1	2.04825	ENSMUSG00000100113	Gm28592	2.11557	ENSMUSG00000041895	Wipi1	3.77694
ENSMUSG00000051439	Cd14	7.11449	ENSMUSG00000047517	Dmbt1	62.2105	ENSMUSG00000051439	Cd14	6.7362	ENSMUSG00000032060	Cryab	21.2756	ENSMUSG00000101628	Gm28177	2.12643	ENSMUSG00000041920	Slc16a6	7.38362
ENSMUSG00000051596	Otop1	110.29	ENSMUSG00000047641	Krt87	6.00298	ENSMUSG00000051596	Otop1	211.588	ENSMUSG00000032062	2310030G06Rik	15.037	ENSMUSG00000102191	Gm36569	5.15	ENSMUSG00000041958	Pigs	2.83333
ENSMUSG00000051735	Rinl	4.72941	ENSMUSG00000047654	Tssk6	3.22917	ENSMUSG00000051735	Rinl	4.52941	ENSMUSG00000032067	Pts	5.20455	ENSMUSG00000102206	Pcdha11	3.74112	ENSMUSG00000041959	S100a10	2.86104
ENSMUSG00000052151	Plpp2	4.28363	ENSMUSG00000047730	Fcgbp	19.314	ENSMUSG00000051853	Arf3	2.09379	ENSMUSG00000032068	Plet1	11.5887	ENSMUSG00000102299	Gm37539	2.60302	ENSMUSG00000042190	Cmklr1	18.6194
ENSMUSG00000052302	Tbc1d30	2.56728	ENSMUSG00000047731	Wbp1l	2.27434	ENSMUSG00000052151	Plpp2	3.98201	ENSMUSG00000032092	Mpzl2	5.28205	ENSMUSG00000102312	Pcdha3	4.08671	ENSMUSG00000042229	Rabif	2.13636
ENSMUSG00000052310	Slc39a1	2.50694	ENSMUSG00000047735	Samd9l	3.35681	ENSMUSG00000052302	Tbc1d30	3.62797	ENSMUSG00000032093	Cd3e	14.1053	ENSMUSG00000102697	Pcdhac2	3.54315	ENSMUSG00000042251	Pm20d1	10.4074
ENSMUSG00000052396	Mogat2	8.51852	ENSMUSG00000047810	Ccdc88b	213.393	ENSMUSG00000052396	Mogat2	11.2222	ENSMUSG00000032122	Slc37a2	7.96053	ENSMUSG00000102877	Gm38314	9.07018	ENSMUSG00000042254	Cilp	9.75938
ENSMUSG00000052423	B4galt3	2.203	ENSMUSG00000048163	Selplg	12.9767	ENSMUSG00000052738	Suclg1	2.15215	ENSMUSG00000032123	Dpagt1	3.11911	ENSMUSG00000103092	Pcdha5	3.93237	ENSMUSG00000042289	Hsd3b7	3.45742
ENSMUSG00000052485	Tmem171	3.86908	ENSMUSG00000048307	Ankrd46	2.06792	ENSMUSG00000052776	Oas1a	4.67857	ENSMUSG00000032172	Olfm2	2.32432	ENSMUSG00000103255	Pcdhac1	3.98276	ENSMUSG00000042331	Specc1	9.57186
ENSMUSG00000052776	Oas1a	8.82143	ENSMUSG00000048482	Bdnf	7.58621	ENSMUSG00000052914	Cyp2j6	7.48428	ENSMUSG00000032218	Ccnb2	4.28571	ENSMUSG00000103310	Pcdha12	4	ENSMUSG00000042349	Ikbke	4.29949
ENSMUSG00000052914	Cyp2j6	7.7327	ENSMUSG00000048534	Amica1	5.08	ENSMUSG00000052942	Glis3	2.54706	ENSMUSG00000032231	Anxa2	2.72304	ENSMUSG00000103434	Gm36993	20.7178	ENSMUSG00000042357	Gjb5	32150
ENSMUSG00000052942	Glis3	2.49269	ENSMUSG00000048578	Mlec	2.17745	ENSMUSG00000053012	Krcc1	3.0702	ENSMUSG00000032246	Calml4	3.47482	ENSMUSG00000103442	Pcdha1	4.23457	ENSMUSG00000042401	Crtac1	38.5882
ENSMUSG00000053119	Chmp3	2.00161	ENSMUSG00000048644	Ctxn1	2.4709	ENSMUSG00000053024	Cntn2	9.4375	ENSMUSG00000032261	Sh3bgrl2	2.82507	ENSMUSG00000103622	Gm38391	2.86111	ENSMUSG00000042453	Reln	7.19048
ENSMUSG00000053137	Mapk11	4.06944	ENSMUSG00000048707	Tprn	3.3648	ENSMUSG00000053119	Chmp3	2.21578	ENSMUSG00000032271	Nnmt	15.875	ENSMUSG00000103668	Gm38186	2.46491	ENSMUSG00000042501	Cpa6	6.73333
ENSMUSG00000053158	Fes	3.96652	ENSMUSG00000048988	Elfn1	9.63871	ENSMUSG00000053158	Fes	3.44866	ENSMUSG00000032279	Idh3a	2.06815	ENSMUSG00000103707	Pcdha6	4.04945	ENSMUSG00000042644	Itpr3	7.82609
ENSMUSG00000053317	Sec61b	2.98762	ENSMUSG00000048992	Prss32	11.4828	ENSMUSG00000053317	Sec61b	2.56931	ENSMUSG00000032289	Thsd4	6.36378	ENSMUSG00000103770	Pcdha9	4.16578	ENSMUSG00000042751	Nmnat2	6.18033
ENSMUSG00000053442	4930597O21Rik	6.36342	ENSMUSG00000049086	Bmyc	2.80429	ENSMUSG00000053442	4930597O21Rik	7.4038	ENSMUSG00000032299	Commd4	2.13445	ENSMUSG00000103800	Pcdha8	4.2931	ENSMUSG00000042793	Lgr6	67.4838
ENSMUSG00000053581	Zfand2a	4.1565	ENSMUSG00000049299	Trappc1	2.86709	ENSMUSG00000053581	Zfand2a	4.47706	ENSMUSG00000032301	Psma4	2.62633	ENSMUSG00000103985	Gm37446	2.63095	ENSMUSG00000042804	Gpr153	3.93484
ENSMUSG00000053706	B430305J03Rik	5.2114	ENSMUSG00000049493	Pls1	8.06905	ENSMUSG00000053693	Mast1	3.26946	ENSMUSG00000032306	Mpi	2.76238	ENSMUSG00000104148	Pcdha2	4.02174	ENSMUSG00000042842	Serpinb6b	18.8193
ENSMUSG00000053797	Krt16	5.09615	ENSMUSG00000049502	Dtx3l	3.75209	ENSMUSG00000053706	B430305J03Rik	4.14014	ENSMUSG00000032313	Tmem266	41.9091	ENSMUSG00000104252	Pcdha4	4.20435	ENSMUSG00000042942	Greb1l	3.00277
ENSMUSG00000053897	Slc39a8	8.04607	ENSMUSG00000049562	Ap5b1	2.82313	ENSMUSG00000053897	Slc39a8	8.14587	ENSMUSG00000032314	Etfa	3.26476	ENSMUSG00000104318	Pcdha7	3.95109	ENSMUSG00000042985	Upk3b	40.5544
ENSMUSG00000054065	Pkp3	2.14235	ENSMUSG00000049686	Orai1	2.23576	ENSMUSG00000054161	Fam83e	20.4	ENSMUSG00000032332	Col12a1	3.0113	ENSMUSG00000104476	Gm38211	3.02941	ENSMUSG00000043088	Il17re	22.2963
ENSMUSG00000054091	1810037I17Rik	2.24541	ENSMUSG00000049717	Lig4	3.43066	ENSMUSG00000054309	Cpsf3	2.15274	ENSMUSG00000032334	Loxl1	8.60253	ENSMUSG00000104507	A430027H14Rik	9.03448	ENSMUSG00000043110	Lrrn4	37.61
ENSMUSG00000054161	Fam83e	14.8385	ENSMUSG00000049922	Slc35c1	5.95824	ENSMUSG00000054342	Kcnn4	7.58577	ENSMUSG00000032352	Lrrc1	3.02381	ENSMUSG00000104574	Gm42836	2.07018	ENSMUSG00000043162	Pyurf	2.07812
ENSMUSG00000054320	Lrrc36	2.39652	ENSMUSG00000050092	Sprr2b	13.251	ENSMUSG00000054453	Sytl5	7.49351	ENSMUSG00000032353	Tmed3	5.57746	ENSMUSG00000104653	Gm43109	7.46154	ENSMUSG00000043448	Gjc2	2.24272
ENSMUSG00000054342	Kcnn4	9.92469	ENSMUSG00000050097	Ces2b	3.08145	ENSMUSG00000054455	Vapb	2.18129	ENSMUSG00000032359	Ctsh	12.1322	ENSMUSG00000104713	Gbp6	2.8	ENSMUSG00000043635	Adamts3	7.1236
ENSMUSG00000054385	Ceacam2	3.29765	ENSMUSG00000050272	Dscam	12.4157	ENSMUSG00000054474	Thnsl2	2.37778	ENSMUSG00000032369	Plscr1	6.39271	ENSMUSG00000104918	Gm42944	2.71845	ENSMUSG00000043664	Tmem221	3.80702
ENSMUSG00000054453	Sytl5	4.66234	ENSMUSG00000050550	Gm11868	2.83784	ENSMUSG00000054537	Tmprss11e	72.45	ENSMUSG00000032372	Plscr2	28.3333	ENSMUSG00000105211	AC125167.1	12.1504	ENSMUSG00000043822	Adamtsl5	4.77835
ENSMUSG00000054537	Tmprss11e	94.25	ENSMUSG00000050565	Tor1aip2	2.4167	ENSMUSG00000054545	Ugt1a6a	3.26303	ENSMUSG00000032373	Car12	210.255	ENSMUSG00000105212	Gm43557	8.77419	ENSMUSG00000043903	Gm22	7.73109
ENSMUSG00000054545	Ugt1a6a	4.33175	ENSMUSG00000050578	Mmp13	136.658	ENSMUSG00000054598	9130230L23Rik	3.64286	ENSMUSG00000032374	Plod2	7.61453	ENSMUSG00000105344	Gm43556	16.7778	ENSMUSG00000043953	Ccrl2	2.45244
ENSMUSG00000054793	Cadm4	2.84527	ENSMUSG00000050627	Gpd1l	2.90219	ENSMUSG00000054871	Tmem158	19.2466	ENSMUSG00000032381	Fam96a	2.725	ENSMUSG00000105415	Gm44364	3.29839	ENSMUSG00000044017	Adgrd1	8.99132
ENSMUSG00000054871	Tmem158	11.0717	ENSMUSG00000050635	Sprr2f	35.3248	ENSMUSG00000054920	Klhl5	5.12363	ENSMUSG00000032383	Ppib	2.98014	ENSMUSG00000105604	Gm42838	3.87952	ENSMUSG00000044042	Fmn1	3.42668
ENSMUSG00000054920	Klhl5	3.23626	ENSMUSG00000050697	Prkaa1	2.33484	ENSMUSG00000055030	Sprr2e	9.06838	ENSMUSG00000032403	2300009A05Rik	2.14563	ENSMUSG00000105873	Gm43708	12.2667	ENSMUSG00000044080	S100a1	6.07955
ENSMUSG00000055030	Sprr2e	21.1325	ENSMUSG00000050732	Vamp8	2.1896	ENSMUSG00000055296	Tmem245	2.28202	ENSMUSG00000032418	Me1	2.71094	ENSMUSG00000106247	Gm43720	3.28723	ENSMUSG00000044167	Foxo1	2.79916
ENSMUSG00000055296	Tmem245	2.01865	ENSMUSG00000050747	Trim15	3.29644	ENSMUSG00000055302	Mrfap1	2.15202	ENSMUSG00000032431	Crtap	3.31704	ENSMUSG00000106344	Mir1892	3.55882	ENSMUSG00000044217	Aqp5	21.0303
ENSMUSG00000055407	Map6	2.67579	ENSMUSG00000050914	Ankrd37	5.71212	ENSMUSG00000055407	Map6	3.02737	ENSMUSG00000032436	Cmtm7	3.4891	ENSMUSG00000106468	AC122844.1	5.01961	ENSMUSG00000044229	Nxpe4	3.79412
ENSMUSG00000055415	Atp10b	11.6661	ENSMUSG00000051022	Hs3st1	22.0887	ENSMUSG00000055415	Atp10b	11.5831	ENSMUSG00000032440	Tgfbr2	2.24958	ENSMUSG00000106702	Gm42846	2.69212	ENSMUSG00000044337	Ackr3	4.34819
ENSMUSG00000055489	Ano5	4.74561	ENSMUSG00000051147	Nat2	3.32787	ENSMUSG00000055489	Ano5	16.0351	ENSMUSG00000032487	Ptgs2	5.78584	ENSMUSG00000106894	Gm17130	2.51923	ENSMUSG00000044408	Sptssa	2.25129
ENSMUSG00000055833	1700034H15Rik	2.94071	ENSMUSG00000051238	Swsap1	3.04225	ENSMUSG00000055612	Cdca7	2.1335	ENSMUSG00000032491	Nradd	2.73596	ENSMUSG00000107011	Gm42906	2.37234	ENSMUSG00000044442	N6amt1	2.24013
ENSMUSG00000055926	Gm14137	11.0604	ENSMUSG00000051256	Jagn1	2.20385	ENSMUSG00000055850	Rnf181	2.12785	ENSMUSG00000032495	Lrrc2	5.2	ENSMUSG00000107090	Gm42884	2.45192	ENSMUSG00000044456	Rin3	12
ENSMUSG00000055976	Cldn23	4.83031	ENSMUSG00000051375	Pcdh1	3.41717	ENSMUSG00000055926	Gm14137	5.77554	ENSMUSG00000032496	Ltf	18.0026	ENSMUSG00000107215	Gm43197	3.275	ENSMUSG00000044986	Tst	3.04348
ENSMUSG00000055994	Nod2	3.63316	ENSMUSG00000051412	Vamp7	2.61631	ENSMUSG00000056025	Clca3a1	5.59067	ENSMUSG00000032537	Ephb1	15.973	ENSMUSG00000107317	Gm19719	5.73171	ENSMUSG00000045062	Pcdhb7	2.92208
ENSMUSG00000056025	Clca3a1	5.38342	ENSMUSG00000051439	Cd14	7.17451	ENSMUSG00000056204	Pgpep1	4.5208	ENSMUSG00000032548	Slco2a1	40.4499	ENSMUSG00000107318	Gm43278	8.05	ENSMUSG00000045092	S1pr1	5.79622
ENSMUSG00000056071	S100a9	11.5099	ENSMUSG00000051596	Otop1	105.295	ENSMUSG00000056310	Tyw1	2.63419	ENSMUSG00000032549	Rab6b	32.245	ENSMUSG00000107969	Gm44085	3.15986	ENSMUSG00000045312	Lhfpl2	8.2614
ENSMUSG00000056144	Trim34a	2.56216	ENSMUSG00000051735	Rinl	4.17647	ENSMUSG00000056486	Chn1	4.95543	ENSMUSG00000032554	Trf	69.407	ENSMUSG00000107997	Gm44243	2.14634	ENSMUSG00000045594	Glb1	3.28986
ENSMUSG00000056529	Ptafr	5.52542	ENSMUSG00000052151	Plpp2	4.64267	ENSMUSG00000056724	Nbeal2	2.04729	ENSMUSG00000032561	Acpp	5.97143	ENSMUSG00000108175	Gm43938	4.32895	ENSMUSG00000045629	Sh3tc2	34.5385
ENSMUSG00000056612	Ppp1r14b	2.32512	ENSMUSG00000052302	Tbc1d30	2.68865	ENSMUSG00000056737	Capg	6.38189	ENSMUSG00000032572	Col6a4	15.167	ENSMUSG00000108255	Gm16499	3.94332	ENSMUSG00000045725	Prr15	40.75
ENSMUSG00000056724	Nbeal2	2.27714	ENSMUSG00000052310	Slc39a1	2.69248	ENSMUSG00000057092	Fxyd3	2.23659	ENSMUSG00000032584	Mst1r	5.07532	ENSMUSG00000108478	Gm19514	3.50273	ENSMUSG00000045733	Sprn	2.50588
ENSMUSG00000056737	Capg	7.22244	ENSMUSG00000052396	Mogat2	10.0741	ENSMUSG00000057315	Arhgap24	5.32708	ENSMUSG00000032602	Slc25a20	3.19881	ENSMUSG00000108511	Gm44987	2.7284	ENSMUSG00000045790	Ccdc149	5.2093
ENSMUSG00000057092	Fxyd3	2.25303	ENSMUSG00000052423	B4galt3	2.388	ENSMUSG00000057666	Gapdh	2.32581	ENSMUSG00000032609	Klhdc8b	2.93622	ENSMUSG00000109408	Gm44935	2.3232	ENSMUSG00000045827	Serpinb9	2.74548
ENSMUSG00000057143	Trim12c	2.47654	ENSMUSG00000052428	Tmco1	2.13564	ENSMUSG00000057672	Pkn1	2.00594	ENSMUSG00000032649	Colgalt2	17.2058	ENSMUSG00000109564	Muc16	3.61569	ENSMUSG00000045854	Lyrm2	4.27632
ENSMUSG00000057346	Apol9a	13.2941	ENSMUSG00000052485	Tmem171	2.50249	ENSMUSG00000057789	Bak1	2.70861	ENSMUSG00000032690	Oas2	12.5833	ENSMUSG00000109715	Gm45606	3.68919	ENSMUSG00000045867	Cradd	3.65972
ENSMUSG00000057421	Las1l	2.44923	ENSMUSG00000052688	Rab7b	2.92491	ENSMUSG00000057963	Itpk1	3.04	ENSMUSG00000032718	Mansc1	4.34615	ENSMUSG00000109812	Gm45640	3.26437	ENSMUSG00000045930	Clec14a	5.14865
ENSMUSG00000057596	Trim30d	6.86	ENSMUSG00000052738	Suclg1	2.18405	ENSMUSG00000058260	Serpina9	70.2703	ENSMUSG00000032726	Bmp8a	10.2319	ENSMUSG00000109866	RP23-248P8.2	3.23684	ENSMUSG00000045980	Tmem104	2.21189
ENSMUSG00000057666	Gapdh	2.81802	ENSMUSG00000052776	Oas1a	13.625	ENSMUSG00000058427	Cxcl2	6.44121	ENSMUSG00000032735	Ablim3	14.359	ENSMUSG00000110062	B430319F04Rik	2.71134	ENSMUSG00000046079	Lrrc8d	3.3913
ENSMUSG00000057789	Bak1	2.75055	ENSMUSG00000052914	Cyp2j6	7.78931	ENSMUSG00000058569	Tmed9	2.1891	ENSMUSG00000032757	Bet1	2.0743	ENSMUSG00000110206	Flt3l	3.54622	ENSMUSG00000046157	Tmem229b	6.18421
ENSMUSG00000057982	Zfp809	2.39972	ENSMUSG00000052942	Glis3	2.41765	ENSMUSG00000058624	Gda	5.78535	ENSMUSG00000032758	Kap	31450	ENSMUSG00000111602	RP24-250L13.2	4.70423	ENSMUSG00000046312	AI464131	4.04545
ENSMUSG00000058260	Serpina9	46.0541	ENSMUSG00000053012	Krcc1	2.23782	ENSMUSG00000058656	Samd12	4.4083	ENSMUSG00000032763	Ilvbl	3.90295	ENSMUSG00000111796	RP24-294A16.4	31.5491	ENSMUSG00000046352	Gjb2	8.12281
ENSMUSG00000058427	Cxcl2	8.23518	ENSMUSG00000053137	Mapk11	3.03241	ENSMUSG00000058952	Cfi	16.4897	ENSMUSG00000032870	Smap2	2.29775				ENSMUSG00000046402	Rbp1	6.93229
ENSMUSG00000058569	Tmed9	2.22587	ENSMUSG00000053158	Fes	3.91741	ENSMUSG00000058966	Fam57b	2.21088	ENSMUSG00000032878	Ccdc85a	36.9643				ENSMUSG00000046449	C77370	28.9643
ENSMUSG00000058624	Gda	8.86882	ENSMUSG00000053317	Sec61b	3.14851	ENSMUSG00000059040	Eno1b	6.14783	ENSMUSG00000032899	Styk1	6				ENSMUSG00000046491	C1qtnf2	3.47674
ENSMUSG00000058656	Samd12	4.6436	ENSMUSG00000053442	4930597O21Rik	6.8266	ENSMUSG00000059149	Mfsd4a	8.84928	ENSMUSG00000032902	Slc16a1	4.9285				ENSMUSG00000046561	Arsj	2.86826
ENSMUSG00000058835	Abi1	2.45257	ENSMUSG00000053581	Zfand2a	4.20022	ENSMUSG00000059277	R74862	2.15169	ENSMUSG00000032925	Itgbl1	6.31034				ENSMUSG00000046572	Zfp518b	2.36826
ENSMUSG00000058952	Cfi	18.9671	ENSMUSG00000053693	Mast1	2.50299	ENSMUSG00000059555	Tor4a	3.73938	ENSMUSG00000032939	Nup93	2.07347				ENSMUSG00000046699	Slitrk4	20.6053
ENSMUSG00000058966	Fam57b	2.49405	ENSMUSG00000053706	B430305J03Rik	4.55344	ENSMUSG00000059883	Irak4	2.55961	ENSMUSG00000032966	Fkbp1a	2.37624				ENSMUSG00000046718	Bst2	10.427
ENSMUSG00000059040	Eno1b	8.48696	ENSMUSG00000053797	Krt16	2.74359	ENSMUSG00000059900	Tmem40	9	ENSMUSG00000033063	Cntnap3	35.3636				ENSMUSG00000046808	Atp10d	2.72
ENSMUSG00000059149	Mfsd4a	6.28248	ENSMUSG00000053897	Slc39a8	8.4453	ENSMUSG00000060032	H2afj	2.82042	ENSMUSG00000033088	Triobp	2.55314				ENSMUSG00000046949	Nqo2	2.30275
ENSMUSG00000059555	Tor4a	2.96911	ENSMUSG00000054065	Pkp3	2.35941	ENSMUSG00000060063	Alox5ap	4.8	ENSMUSG00000033096	Apmap	2.25641				ENSMUSG00000047037	Nipa1	2.15315
ENSMUSG00000059900	Tmem40	8.63889	ENSMUSG00000054161	Fam83e	14.1462	ENSMUSG00000060188	Cxcl17	8.38671	ENSMUSG00000033161	Atp1a1	2.36959				ENSMUSG00000047298	Kcnv2	7.10345
ENSMUSG00000060032	H2afj	3.11439	ENSMUSG00000054200	Ffar4	84.2893	ENSMUSG00000060224	Pyroxd2	14.9814	ENSMUSG00000033170	Card10	2.64088				ENSMUSG00000047414	Flrt2	8.78213
ENSMUSG00000060063	Alox5ap	2.90811	ENSMUSG00000054342	Kcnn4	13.3556	ENSMUSG00000060402	Chst8	26.4014	ENSMUSG00000033174	Mgll	3.22764				ENSMUSG00000047415	Gpr68	7.75862
ENSMUSG00000060188	Cxcl17	8.65955	ENSMUSG00000054404	Slfn5	2.68576	ENSMUSG00000060538	Tmem219	2.55975	ENSMUSG00000033192	Lpcat2	2.972				ENSMUSG00000047557	Lxn	3.24194
ENSMUSG00000060224	Pyroxd2	4.49068	ENSMUSG00000054453	Sytl5	7.16883	ENSMUSG00000060572	Mfap2	6.92857	ENSMUSG00000033287	Kctd17	2.91059				ENSMUSG00000047641	Krt87	15.4286
ENSMUSG00000060402	Chst8	19.6479	ENSMUSG00000054537	Tmprss11e	68	ENSMUSG00000060791	Gmfg	2.64773	ENSMUSG00000033295	Ptprf	3.63787				ENSMUSG00000047730	Fcgbp	44.4026
ENSMUSG00000060512	0610040J01Rik	2.01446	ENSMUSG00000054545	Ugt1a6a	5.9609	ENSMUSG00000060961	Slc4a4	2.99684	ENSMUSG00000033313	Fbxl8	3.47222				ENSMUSG00000048078	Tenm4	17.8415
ENSMUSG00000060639	Hist1h4i	2.28077	ENSMUSG00000054693	Adam10	2.21647	ENSMUSG00000061144	Spink12	111.667	ENSMUSG00000033355	Rtp4	4.2381				ENSMUSG00000048087	Gm4737	6.5963
ENSMUSG00000060791	Gmfg	3.52273	ENSMUSG00000054871	Tmem158	9.98655	ENSMUSG00000061259	Tmprss11d	39.9048	ENSMUSG00000033377	Palmd	2.95455				ENSMUSG00000048126	Col6a3	13.5571
ENSMUSG00000060961	Slc4a4	5.14842	ENSMUSG00000054920	Klhl5	3.16758	ENSMUSG00000061461	Smim20	2.54545	ENSMUSG00000033386	Frrs1	2.55257				ENSMUSG00000048304	Slitrk3	4.58788
ENSMUSG00000061144	Spink12	298.833	ENSMUSG00000055030	Sprr2e	13.3419	ENSMUSG00000061666	Gdpd1	5.58	ENSMUSG00000033389	Arhgap44	4.34349				ENSMUSG00000048307	Ankrd46	3.78456
ENSMUSG00000061232	H2-K1	2.37635	ENSMUSG00000055413	H2-Q5	3.27397	ENSMUSG00000061718	Ppp1r1b	7.22564	ENSMUSG00000033450	Tagap	5.78363				ENSMUSG00000048337	Npy4r	26050
ENSMUSG00000061259	Tmprss11d	87.619	ENSMUSG00000055415	Atp10b	12.868	ENSMUSG00000061759	Armt1	3.09605	ENSMUSG00000033629	Hacd3	2.65185				ENSMUSG00000048368	Omd	8.45652
ENSMUSG00000061666	Gdpd1	6.43333	ENSMUSG00000055926	Gm14137	6.08921	ENSMUSG00000062054	Iah1	3.76513	ENSMUSG00000033684	Qsox1	4.35328				ENSMUSG00000048450	Msx1	3.37821
ENSMUSG00000061718	Ppp1r1b	2.70769	ENSMUSG00000055976	Cldn23	3.35572	ENSMUSG00000062070	Pgk1	3.65591	ENSMUSG00000033715	Akr1c14	33.2371				ENSMUSG00000048485	Zbtb8b	78.9412
ENSMUSG00000062070	Pgk1	5.15249	ENSMUSG00000055978	Fut2	2.81884	ENSMUSG00000062393	Dgkk	58.0526	ENSMUSG00000033768	Nrxn2	2.47674				ENSMUSG00000048578	Mlec	2.16704
ENSMUSG00000062393	Dgkk	21.1053	ENSMUSG00000055994	Nod2	3.69312	ENSMUSG00000062963	Ufc1	2.12762	ENSMUSG00000033809	Alg3	7.63333				ENSMUSG00000048612	Myof	2.73783
ENSMUSG00000062515	Fabp4	7.52273	ENSMUSG00000056025	Clca3a1	3.44041	ENSMUSG00000063146	Clip2	4.25975	ENSMUSG00000033845	Mrpl15	2.29967				ENSMUSG00000048834	Vstm2a	7.55128
ENSMUSG00000063146	Clip2	2.63099	ENSMUSG00000056032	BC018473	3.08247	ENSMUSG00000063229	Ldha	2.65826	ENSMUSG00000033880	Lgals3bp	8.98121				ENSMUSG00000049107	Ntf3	2.97222
ENSMUSG00000063171	Rps4l	3.12048	ENSMUSG00000056144	Trim34a	2.41622	ENSMUSG00000063354	Slc39a4	3.68181	ENSMUSG00000033910	Gucy1a3	4.06502				ENSMUSG00000049112	Oxtr	75.3067
ENSMUSG00000063229	Ldha	3.06589	ENSMUSG00000056486	Chn1	2.60724	ENSMUSG00000063524	Eno1	3.90111	ENSMUSG00000033938	Ndufb7	2.89399				ENSMUSG00000049299	Trappc1	3.45714
ENSMUSG00000063354	Slc39a4	2.74857	ENSMUSG00000056529	Ptafr	5.69492	ENSMUSG00000063659	Zbtb18	2.21429	ENSMUSG00000033952	Aspm	2.9				ENSMUSG00000049327	Kmt5a	2.15245
ENSMUSG00000063522	2010109I03Rik	69.6148	ENSMUSG00000056724	Nbeal2	2.54112	ENSMUSG00000063779	Chil4	8.3125	ENSMUSG00000034117	Ptgdr2	2.88147				ENSMUSG00000049420	Tmem200a	4.57592
ENSMUSG00000063524	Eno1	4.77669	ENSMUSG00000056737	Capg	6.23031	ENSMUSG00000063838	1700027J19Rik	2.55734	ENSMUSG00000034203	Chchd4	2.27907				ENSMUSG00000049526	Tmem202	2.85714
ENSMUSG00000063659	Zbtb18	2.45495	ENSMUSG00000056973	Ces1d	2.91037	ENSMUSG00000063851	Rnf183	5.19298	ENSMUSG00000034205	Loxl2	10.0803				ENSMUSG00000049556	Lingo1	3.59494
ENSMUSG00000063779	Chil4	6.375	ENSMUSG00000057092	Fxyd3	2.4814	ENSMUSG00000063856	Gpx1	10.2085	ENSMUSG00000034259	Exosc4	2.53731				ENSMUSG00000049960	Mrps16	2.39286
ENSMUSG00000063838	1700027J19Rik	3.18349	ENSMUSG00000057346	Apol9a	16.5882	ENSMUSG00000063904	Dpp3	3.20086	ENSMUSG00000034271	Jdp2	6.10845				ENSMUSG00000049985	Ankrd55	20.125
ENSMUSG00000063851	Rnf183	7.50877	ENSMUSG00000057421	Las1l	2.72576	ENSMUSG00000063931	Pepd	4.07489	ENSMUSG00000034311	Kif4	4.45455				ENSMUSG00000050014	Apol10b	2.88298
ENSMUSG00000063856	Gpx1	7.68229	ENSMUSG00000057596	Trim30d	6.62	ENSMUSG00000064057	Scgb3a1	111.406	ENSMUSG00000034371	Tkfc	8.08527				ENSMUSG00000050069	Grem2	5.39305
ENSMUSG00000063904	Dpp3	3.24534	ENSMUSG00000057666	Gapdh	2.48584	ENSMUSG00000064156	Prol1	10905	ENSMUSG00000034382	AI661453	5.85185				ENSMUSG00000050108	Bpifc	483.085
ENSMUSG00000063931	Pepd	4.35977	ENSMUSG00000057789	Bak1	3.74614	ENSMUSG00000064193	Gm4735	8.0119	ENSMUSG00000034394	Lif	5.25275				ENSMUSG00000050174	Nudt6	3.6813
ENSMUSG00000064057	Scgb3a1	48.8438	ENSMUSG00000057982	Zfp809	2.29243	ENSMUSG00000064246	Chil1	17.2969	ENSMUSG00000034424	Gcsh	2.206				ENSMUSG00000050272	Dscam	42.3077
ENSMUSG00000064193	Gm4735	9.05952	ENSMUSG00000058163	Gm5431	7.55276	ENSMUSG00000064330	Pde6h	4.56944	ENSMUSG00000034435	Tmem30b	18.6379				ENSMUSG00000050335	Lgals3	8.87557
ENSMUSG00000064215	Ifi27	2.98571	ENSMUSG00000058260	Serpina9	54	ENSMUSG00000064443	Gm26226	17.2	ENSMUSG00000034438	Gbp8	3.16667				ENSMUSG00000050377	Il31ra	40.2045
ENSMUSG00000064246	Chil1	31.4844	ENSMUSG00000058427	Cxcl2	7.71887	ENSMUSG00000066129	Kndc1	26.85	ENSMUSG00000034445	Cyb561a3	2.43369				ENSMUSG00000050552	Lamtor4	4.47059
ENSMUSG00000064365	mt-Ts2	4.94656	ENSMUSG00000058569	Tmed9	2.4629	ENSMUSG00000066278	Vps37b	2.00181	ENSMUSG00000034459	Ifit1	4.66851				ENSMUSG00000050556	Kcnb1	3.01105
ENSMUSG00000064443	Gm26226	14.28	ENSMUSG00000058624	Gda	9.21124	ENSMUSG00000066516	Klk1b21	19.7333	ENSMUSG00000034460	Six4	3.38235				ENSMUSG00000050558	Prokr2	151.122
ENSMUSG00000065408	Mir31	4.46212	ENSMUSG00000058656	Samd12	5.08651	ENSMUSG00000067071	Hes6	3.26667	ENSMUSG00000034566	Atp5h	2.31404				ENSMUSG00000050635	Sprr2f	30
ENSMUSG00000066129	Kndc1	51.95	ENSMUSG00000058835	Abi1	2.4436	ENSMUSG00000067750	Khdc1a	223.353	ENSMUSG00000034612	Chst11	2.55364				ENSMUSG00000050732	Vamp8	5.10185
ENSMUSG00000066366	Serpina1a	134.889	ENSMUSG00000058952	Cfi	32.3951	ENSMUSG00000067825	Pex26	3.27338	ENSMUSG00000034675	Dbn1	3.12036				ENSMUSG00000050737	Ptges	3.32922
ENSMUSG00000066607	6030419C18Rik	2.33255	ENSMUSG00000058966	Fam57b	2.16241	ENSMUSG00000068011	Mkrn2os	12.25	ENSMUSG00000034684	Sema3f	6.27397				ENSMUSG00000050751	Pgbd5	10.6333
ENSMUSG00000066800	Rnasel	2.052	ENSMUSG00000059040	Eno1b	7.57391	ENSMUSG00000068122	Agtr2	68550	ENSMUSG00000034685	Fam171a2	3.00727				ENSMUSG00000050856	Atp5k	2.15584
ENSMUSG00000066861	Oas1g	11.4318	ENSMUSG00000059149	Mfsd4a	5.83033	ENSMUSG00000068335	Dok1	2.925	ENSMUSG00000034687	Fras1	9.53828				ENSMUSG00000050908	Tvp23a	2.17714
ENSMUSG00000067006	Serpinb5	3.6359	ENSMUSG00000059555	Tor4a	3.02317	ENSMUSG00000068348	Gm10238	14550	ENSMUSG00000034708	Grn	2.83727				ENSMUSG00000050931	Sgms2	2.93886
ENSMUSG00000067071	Hes6	3.45	ENSMUSG00000059743	Fdps	2.18321	ENSMUSG00000068523	Gng5	2.2548	ENSMUSG00000034714	Ttyh2	2.21053				ENSMUSG00000050953	Gja1	3.197
ENSMUSG00000067219	Nipal1	5.63529	ENSMUSG00000059751	Rps3a3	6.74033	ENSMUSG00000069255	Dusp22	2.54015	ENSMUSG00000034730	Adgrb1	3.24359				ENSMUSG00000051007	Pddc1	2.93455
ENSMUSG00000067750	Khdc1a	52.495	ENSMUSG00000059883	Irak4	2.39903	ENSMUSG00000069808	Fam57a	2.77596	ENSMUSG00000034748	Sirt6	3.15385				ENSMUSG00000051048	P4ha3	36.3505
ENSMUSG00000067768	Xlr4b	17.4927	ENSMUSG00000059900	Tmem40	8.66667	ENSMUSG00000069844	Sco1	2.20074	ENSMUSG00000034755	Pcdh11x	4				ENSMUSG00000051062	Fbll1	28.7778
ENSMUSG00000068011	Mkrn2os	20.6667	ENSMUSG00000060032	H2afj	2.40713	ENSMUSG00000069899	Gm12166	2.19417	ENSMUSG00000034786	Gpsm3	4.92647				ENSMUSG00000051065	Mb21d2	3.06145
ENSMUSG00000068122	Agtr2	12800	ENSMUSG00000060063	Alox5ap	3.87568	ENSMUSG00000070003	Ssbp4	2.27329	ENSMUSG00000034853	Acot11	6.67647				ENSMUSG00000051076	Vtcn1	6.58511
ENSMUSG00000068245	Phf11d	2.42927	ENSMUSG00000060090	Rp2	2.21751	ENSMUSG00000070305	Mpzl3	3.20312	ENSMUSG00000034868	Myl12b	2.20484				ENSMUSG00000051154	Commd3	2.62406
ENSMUSG00000068335	Dok1	2.975	ENSMUSG00000060188	Cxcl17	11.1186	ENSMUSG00000070419	Cyp3a57	5.77778	ENSMUSG00000034871	Fam151a	15.5417				ENSMUSG00000051242	Pcdhb9	3.73016
ENSMUSG00000068348	Gm10238	12100	ENSMUSG00000060224	Pyroxd2	5.1118	ENSMUSG00000070462	Mesdc1	2.99814	ENSMUSG00000034880	Mrpl34	5.20635				ENSMUSG00000051279	Gdf6	4.15789
ENSMUSG00000068417	Pnp2	2.50769	ENSMUSG00000060402	Chst8	16.8662	ENSMUSG00000070546	Mrgprb3	49550	ENSMUSG00000034903	Cobll1	6.54845				ENSMUSG00000051319	1500011K16Rik	3.10227
ENSMUSG00000068523	Gng5	2.38192	ENSMUSG00000060441	Trim5	4.78	ENSMUSG00000070564	Ntn5	10.4375	ENSMUSG00000034947	Tmem106a	3.37838				ENSMUSG00000051359	Ncald	4.50345
ENSMUSG00000068893	Sprr2a2	77.3333	ENSMUSG00000060512	0610040J01Rik	2.53134	ENSMUSG00000070574	2310016G11Rik	2.48927	ENSMUSG00000035000	Dpp4	43.589				ENSMUSG00000051367	Six1	60.6667
ENSMUSG00000069255	Dusp22	2.47445	ENSMUSG00000060519	Tor3a	2.26673	ENSMUSG00000070661	Rnf186	12.8929	ENSMUSG00000035104	Eva1a	3.53608				ENSMUSG00000051439	Cd14	2.55556
ENSMUSG00000069808	Fam57a	2.75263	ENSMUSG00000060791	Gmfg	2.75	ENSMUSG00000070720	Tmem200b	6.65049	ENSMUSG00000035105	Egln3	2.53731				ENSMUSG00000051550	Zfp579	2.52632
ENSMUSG00000070047	Fat1	2.56976	ENSMUSG00000060802	B2m	2.53723	ENSMUSG00000070780	Rbm47	2.43407	ENSMUSG00000035107	Dcbld2	4.37008				ENSMUSG00000051950	B3glct	3.75619
ENSMUSG00000070305	Mpzl3	4.85	ENSMUSG00000060961	Slc4a4	5.80632	ENSMUSG00000071074	Yipf3	2.21566	ENSMUSG00000035198	Tubg1	2.97778				ENSMUSG00000052031	Tagap1	2.15868
ENSMUSG00000070462	Mesdc1	2.30316	ENSMUSG00000061144	Spink12	239.333	ENSMUSG00000071203	Naip5	15.3822	ENSMUSG00000035199	Arl6ip5	3.32184				ENSMUSG00000052085	Dock8	2.17424
ENSMUSG00000070473	Cldn3	2.75492	ENSMUSG00000061232	H2-K1	2.31305	ENSMUSG00000071265	1700086L19Rik	15.3277	ENSMUSG00000035212	Leprot	3.19559				ENSMUSG00000052105	Mtcl1	3.25821
ENSMUSG00000070546	Mrgprb3	22050	ENSMUSG00000061259	Tmprss11d	61.7619	ENSMUSG00000071266	Zfp946	3.41436	ENSMUSG00000035232	Pdk3	2.3339				ENSMUSG00000052117	D630039A03Rik	8.6789
ENSMUSG00000070564	Ntn5	31	ENSMUSG00000061411	Nol4l	2.35971	ENSMUSG00000071379	Hpcal1	2.44586	ENSMUSG00000035245	Eogt	2.1				ENSMUSG00000052133	Sema5b	3.51185
ENSMUSG00000070594	Gm4788	4.88889	ENSMUSG00000061666	Gdpd1	5.97333	ENSMUSG00000071662	Polr2g	2.56467	ENSMUSG00000035273	Hpse	4.07692				ENSMUSG00000052139	Bre	2.07143
ENSMUSG00000070639	Lrrc8b	3.75811	ENSMUSG00000061718	Ppp1r1b	3.50256	ENSMUSG00000072214	Sept5	3.3022	ENSMUSG00000035279	Ssc5d	3.1775				ENSMUSG00000052151	Plpp2	3.36232
ENSMUSG00000070661	Rnf186	27.5714	ENSMUSG00000062070	Pgk1	5.49853	ENSMUSG00000072244	Trim6	6.85417	ENSMUSG00000035314	Gdpd5	2.60734				ENSMUSG00000052316	Lrrc15	6.24667
ENSMUSG00000071177	Serpina1d	19150	ENSMUSG00000062515	Fabp4	12.1591	ENSMUSG00000072572	Slc39a2	4.65144	ENSMUSG00000035373	Ccl7	5.65447				ENSMUSG00000052428	Tmco1	2.0284
ENSMUSG00000071178	Serpina1b	25.6098	ENSMUSG00000063146	Clip2	2.29877	ENSMUSG00000072620	Slfn2	4.34437	ENSMUSG00000035385	Ccl2	3.78271				ENSMUSG00000052593	Adam17	2.69188
ENSMUSG00000071203	Naip5	10.3311	ENSMUSG00000063229	Ldha	3.39675	ENSMUSG00000072621	Slfn10-ps	5.21212	ENSMUSG00000035403	Crb2	10.227				ENSMUSG00000052738	Suclg1	2.18992
ENSMUSG00000071265	1700086L19Rik	8.81155	ENSMUSG00000063354	Slc39a4	2.33085	ENSMUSG00000072753	9230020A06Rik	57600	ENSMUSG00000035413	Tmem98	8.2968				ENSMUSG00000052854	Nrk	29.9471
ENSMUSG00000071266	Zfp946	2.53591	ENSMUSG00000063524	Eno1	4.8468	ENSMUSG00000072845	Tmprss11a	234.412	ENSMUSG00000035431	Sstr1	9.62963				ENSMUSG00000052914	Cyp2j6	2.16854
ENSMUSG00000071379	Hpcal1	2.3758	ENSMUSG00000063659	Zbtb18	2.63297	ENSMUSG00000072849	Serpina1e	17.981	ENSMUSG00000035441	Myo1d	2.46497				ENSMUSG00000053024	Cntn2	418
ENSMUSG00000072214	Sept5	4.35714	ENSMUSG00000063838	1700027J19Rik	2.95642	ENSMUSG00000072962	Gm16401	5.97674	ENSMUSG00000035513	Ntng2	2.61777				ENSMUSG00000053158	Fes	2.33571
ENSMUSG00000072244	Trim6	4.26042	ENSMUSG00000063851	Rnf183	11.386	ENSMUSG00000073399	Trim40	9.95455	ENSMUSG00000035674	Ndufa3	4.01449				ENSMUSG00000053279	Aldh1a1	9.60392
ENSMUSG00000072572	Slc39a2	5.20192	ENSMUSG00000063856	Gpx1	5.18454	ENSMUSG00000073437	D330041H03Rik	2.10766	ENSMUSG00000035790	Cep19	2.25466				ENSMUSG00000053291	Rab4b	2.33799
ENSMUSG00000072620	Slfn2	12.1457	ENSMUSG00000063904	Dpp3	3.7977	ENSMUSG00000074006	Omp	4.79586	ENSMUSG00000035845	Alg12	4.00752				ENSMUSG00000053317	Sec61b	4.6068
ENSMUSG00000072621	Slfn10-ps	9.72727	ENSMUSG00000063931	Pepd	3.90162	ENSMUSG00000074030	Exoc8	2.73321	ENSMUSG00000035896	Rnase1	10.2222				ENSMUSG00000053368	Rxfp2	16.4979
ENSMUSG00000072753	9230020A06Rik	28650	ENSMUSG00000064057	Scgb3a1	8.71875	ENSMUSG00000074064	Mlycd	2.6699	ENSMUSG00000035914	Cd276	2.76201				ENSMUSG00000053414	Hunk	10.8037
ENSMUSG00000072845	Tmprss11a	86.5882	ENSMUSG00000064193	Gm4735	10.4762	ENSMUSG00000074300	BC030870	35.1648	ENSMUSG00000035916	Ptprq	16.475				ENSMUSG00000053441	Adamts19	3.03203
ENSMUSG00000072849	Serpina1e	83.1359	ENSMUSG00000064215	Ifi27	3.42245	ENSMUSG00000074340	Ovgp1	4.47973	ENSMUSG00000035930	Chst4	181.75				ENSMUSG00000053475	Tnfaip6	2.24412
ENSMUSG00000072875	Gpr27	3.08989	ENSMUSG00000064246	Chil1	159.578	ENSMUSG00000074445	Sprr2a3	43.1351	ENSMUSG00000035954	Dock4	3.67143				ENSMUSG00000053522	Lgals7	26.2143
ENSMUSG00000072962	Gm16401	6.02326	ENSMUSG00000064330	Pde6h	3.34722	ENSMUSG00000074465	Gm10701	209.98	ENSMUSG00000036002	Fam214b	2.04206				ENSMUSG00000053615	Gm9913	3.27641
ENSMUSG00000073067	9130019P16Rik	3.89764	ENSMUSG00000064443	Gm26226	6.76	ENSMUSG00000074625	Arhgap40	12.3376	ENSMUSG00000036006	Fam65b	3.23062				ENSMUSG00000054162	Spock3	34.92
ENSMUSG00000073399	Trim40	41.0909	ENSMUSG00000065408	Mir31	3.33333	ENSMUSG00000074715	Ccl28	15.8474	ENSMUSG00000036026	Tmem63b	2.28797				ENSMUSG00000054203	Ifi205	6.20172
ENSMUSG00000073402	Gm8909	3.65672	ENSMUSG00000065820	Gm26316	2.22414	ENSMUSG00000074738	Fndc10	5.18565	ENSMUSG00000036036	Zfp57	2.81055				ENSMUSG00000054312	Mrps21	3.52174
ENSMUSG00000073411	H2-D1	3.22408	ENSMUSG00000066129	Kndc1	31.4	ENSMUSG00000074813	Gm14005	3.87935	ENSMUSG00000036078	Sigmar1	2.51005				ENSMUSG00000054545	Ugt1a6a	2.21301
ENSMUSG00000073489	Ifi204	7.41848	ENSMUSG00000066366	Serpina1a	27.1111	ENSMUSG00000074829	2010315B03Rik	2.31951	ENSMUSG00000036098	Myrf	99.2636				ENSMUSG00000054555	Adam12	5.11943
ENSMUSG00000073490	Ifi207	10.6444	ENSMUSG00000066800	Rnasel	2.69857	ENSMUSG00000074892	B3galt5	222.355	ENSMUSG00000036109	Mbnl3	5.06481				ENSMUSG00000054619	Mettl7a1	5.00268
ENSMUSG00000073802	Cdkn2b	4.51938	ENSMUSG00000066861	Oas1g	15.8636	ENSMUSG00000075217	4833423E24Rik	2.07139	ENSMUSG00000036136	Fam110c	54.9496				ENSMUSG00000054675	Tmem119	5.62277
ENSMUSG00000074006	Omp	8.89941	ENSMUSG00000067006	Serpinb5	2.71282	ENSMUSG00000075419	Dolk	2.2931	ENSMUSG00000036218	Pdzrn4	9.22857				ENSMUSG00000054814	Usp46	2.94843
ENSMUSG00000074300	BC030870	23.3766	ENSMUSG00000067017	Gm3608	2.39459	ENSMUSG00000075590	Nrbp2	2.03348	ENSMUSG00000036241	Ube2r2	2.28093				ENSMUSG00000055022	Cntn1	4.66928
ENSMUSG00000074445	Sprr2a3	233.243	ENSMUSG00000067071	Hes6	2.91667	ENSMUSG00000075611	Gm11545	2.78014	ENSMUSG00000036264	Fstl4	2.87854				ENSMUSG00000055301	Adh7	20.1333
ENSMUSG00000074465	Gm10701	132.735	ENSMUSG00000067203	H2-K2	3.8041	ENSMUSG00000076128	Mir686	2.94444	ENSMUSG00000036295	Lrrn3	8.14103				ENSMUSG00000055489	Ano5	270.333
ENSMUSG00000074489	Bglap3	3.51562	ENSMUSG00000067212	H2-T23	2.69195	ENSMUSG00000076436	Oxct2a	9.68519	ENSMUSG00000036306	Lzts1	24.8696				ENSMUSG00000055652	Klhl25	2.35897
ENSMUSG00000074625	Arhgap40	7.94904	ENSMUSG00000067219	Nipal1	5.16471	ENSMUSG00000076441	Ass1	9.02871	ENSMUSG00000036372	Tmem258	3.39267				ENSMUSG00000055745	Ldoc1l	2.60177
ENSMUSG00000074715	Ccl28	7.64123	ENSMUSG00000067235	H2-Q10	2.98194	ENSMUSG00000076534	Igkv12-89	20555	ENSMUSG00000036381	P2ry14	3.87781				ENSMUSG00000055912	Tmem150a	4.29205
ENSMUSG00000074738	Fndc10	4.2616	ENSMUSG00000067768	Xlr4b	9.95419	ENSMUSG00000078317	F8a	2.3945	ENSMUSG00000036402	Gng12	2.29648				ENSMUSG00000056091	St3gal5	10.951
ENSMUSG00000074796	Slc4a11	2.52206	ENSMUSG00000068011	Mkrn2os	27.0833	ENSMUSG00000078439	Smim24	3.53165	ENSMUSG00000036412	Arsi	7.35593				ENSMUSG00000056121	Fez2	2.30732
ENSMUSG00000074813	Gm14005	4.67485	ENSMUSG00000068245	Phf11d	3.21707	ENSMUSG00000078606	Gm4070	10.2222	ENSMUSG00000036446	Lum	4.62533				ENSMUSG00000056174	Col8a2	19.2317
ENSMUSG00000074892	B3galt5	205.19	ENSMUSG00000068335	Dok1	2.7	ENSMUSG00000078612	1700024P16Rik	8.50617	ENSMUSG00000036523	Greb1	22.4095				ENSMUSG00000056481	Cd248	2.83438
ENSMUSG00000075265	Tnk2os	2.44144	ENSMUSG00000068348	Gm10238	15200	ENSMUSG00000078719	Msmp	2.44286	ENSMUSG00000036528	Ppfibp2	3.38924				ENSMUSG00000056486	Chn1	3.91139
ENSMUSG00000075602	Ly6a	12.5574	ENSMUSG00000068735	Trp53i11	2.8	ENSMUSG00000078776	9530053A07Rik	14.9835	ENSMUSG00000036545	Adamts2	16.8507				ENSMUSG00000056515	Rab31	5.11884
ENSMUSG00000075611	Gm11545	2.40426	ENSMUSG00000068758	Il3ra	2.24561	ENSMUSG00000078793	Gm5155	65.6344	ENSMUSG00000036553	Sh3tc1	10.625				ENSMUSG00000056612	Ppp1r14b	3.38012
ENSMUSG00000075707	Dio3	5	ENSMUSG00000068893	Sprr2a2	28.6667	ENSMUSG00000078813	Leng1	2.82382	ENSMUSG00000036564	Ndrg4	2.88333				ENSMUSG00000056643	Chst13	186.567
ENSMUSG00000076128	Mir686	3.05556	ENSMUSG00000069255	Dusp22	2.29927	ENSMUSG00000078908	Mon1b	2.27636	ENSMUSG00000036565	Ttyh3	2.05845				ENSMUSG00000056679	Gpr173	2.61538
ENSMUSG00000076436	Oxct2a	11.037	ENSMUSG00000069808	Fam57a	2.80047	ENSMUSG00000078942	Naip6	8.00772	ENSMUSG00000036585	Fgf1	20.7089				ENSMUSG00000056755	Grm7	3.65957
ENSMUSG00000076441	Ass1	8.99043	ENSMUSG00000070003	Ssbp4	2.26087	ENSMUSG00000078945	Naip2	31.1897	ENSMUSG00000036596	Cpz	20.5				ENSMUSG00000057092	Fxyd3	3.72477
ENSMUSG00000078317	F8a	3.16055	ENSMUSG00000070305	Mpzl3	4.04688	ENSMUSG00000079363	Gbp4	4.62178	ENSMUSG00000036632	Alg5	2.69928				ENSMUSG00000057388	Mrpl18	2.32422
ENSMUSG00000078439	Smim24	5.21519	ENSMUSG00000070327	Rnf213	3.11548	ENSMUSG00000079451	Tmprss11g	105.262	ENSMUSG00000036745	Ttll7	2.59494				ENSMUSG00000057411	Fam173a	2.36214
ENSMUSG00000078566	Bnip3	3.14807	ENSMUSG00000070462	Mesdc1	2.32424	ENSMUSG00000079620	Muc4	8.9211	ENSMUSG00000036751	Cox6b1	3.80056				ENSMUSG00000057789	Bak1	3.23077
ENSMUSG00000078606	Gm4070	20.2037	ENSMUSG00000070473	Cldn3	2.38934	ENSMUSG00000080268	Brms1	3.01478	ENSMUSG00000036777	Anln	30.9848				ENSMUSG00000057969	Sema3b	4.80982
ENSMUSG00000078612	1700024P16Rik	8.20576	ENSMUSG00000070546	Mrgprb3	15850	ENSMUSG00000081119	Gm14601	20.6552	ENSMUSG00000036781	Rps27l	3.20806				ENSMUSG00000058076	Sdhc	2.04405
ENSMUSG00000078664	Sprr2a1	135.13	ENSMUSG00000070564	Ntn5	28.0625	ENSMUSG00000082956	Naip3	11.2451	ENSMUSG00000036790	Slitrk2	3.46377				ENSMUSG00000058248	Kcnh1	3.41667
ENSMUSG00000078776	9530053A07Rik	16.0714	ENSMUSG00000070661	Rnf186	28.2143	ENSMUSG00000083834	Gm12577	9.90909	ENSMUSG00000036850	Mrpl41	3.2043				ENSMUSG00000058420	Syt17	12
ENSMUSG00000078793	Gm5155	90.2098	ENSMUSG00000070720	Tmem200b	4.58252	ENSMUSG00000084817	Gm5526	2.43697	ENSMUSG00000036860	Mrpl55	2.32692				ENSMUSG00000058427	Cxcl2	11.8542
ENSMUSG00000078813	Leng1	3.90323	ENSMUSG00000071074	Yipf3	2.08854	ENSMUSG00000084843	B230312C02Rik	33	ENSMUSG00000036880	Acaa2	5.48283				ENSMUSG00000058624	Gda	12.2338
ENSMUSG00000078908	Mon1b	2.16134	ENSMUSG00000071178	Serpina1b	6.63415	ENSMUSG00000084890	A830036E02Rik	6.30189	ENSMUSG00000036894	Rap2b	2.66195				ENSMUSG00000058833	2810428I15Rik	2.19016
ENSMUSG00000078942	Naip6	6.29327	ENSMUSG00000071203	Naip5	9.96046	ENSMUSG00000085023	Gm12744	12.1058	ENSMUSG00000036908	Unc93b1	3.1068				ENSMUSG00000059022	Kcp	6.82131
ENSMUSG00000078945	Naip2	23.5	ENSMUSG00000071265	1700086L19Rik	9.29285	ENSMUSG00000085278	Gm12841	2.70543	ENSMUSG00000036931	Nfkbid	2.56075				ENSMUSG00000059040	Eno1b	2.29825
ENSMUSG00000079015	Serpina1c	153050	ENSMUSG00000071266	Zfp946	2.79006	ENSMUSG00000085360	Arhgap27os2	5.28729	ENSMUSG00000037005	Xpnpep2	27.9381				ENSMUSG00000059146	Ntrk3	5.63625
ENSMUSG00000079019	Insl3	4.96078	ENSMUSG00000071379	Hpcal1	2.80255	ENSMUSG00000085498	Gm14023	32.1091	ENSMUSG00000037020	Wdr62	2.36264				ENSMUSG00000059518	Znhit1	2.34177
ENSMUSG00000079197	Psme2	2.93844	ENSMUSG00000071537	Klrg2	3.43379	ENSMUSG00000085505	Gm12868	3.00929	ENSMUSG00000037035	Inhbb	20.9261				ENSMUSG00000059534	Uqcr10	3.80932
ENSMUSG00000079330	Lemd1	9.22727	ENSMUSG00000072214	Sept5	3.61538	ENSMUSG00000085533	Gm12146	10.5766	ENSMUSG00000037049	Smpd1	3.5443				ENSMUSG00000059734	Ndufs8	2.28803
ENSMUSG00000079339	Ifit1bl1	101.995	ENSMUSG00000072244	Trim6	5.96875	ENSMUSG00000085587	Gm14493	2.29621	ENSMUSG00000037060	Prkcdbp	3.68013				ENSMUSG00000059810	Rgs3	2.82236
ENSMUSG00000079363	Gbp4	3.9914	ENSMUSG00000072572	Slc39a2	4.57933	ENSMUSG00000085664	Atxn7l1os2	2.64583	ENSMUSG00000037062	Sh3glb1	2.0448				ENSMUSG00000059901	Adamts14	18.2963
ENSMUSG00000079451	Tmprss11g	100.619	ENSMUSG00000072620	Slfn2	12.2583	ENSMUSG00000085733	Arhgap27os1	2.84314	ENSMUSG00000037071	Scd1	2.5051				ENSMUSG00000059908	Mug1	209500
ENSMUSG00000079523	Tmsb10	2.66031	ENSMUSG00000072621	Slfn10-ps	7.31313	ENSMUSG00000085810	Gm16325	83.0833	ENSMUSG00000037072	Selenof	2.59095				ENSMUSG00000059921	Unc5c	3.66038
ENSMUSG00000079620	Muc4	23.5979	ENSMUSG00000072753	9230020A06Rik	25050	ENSMUSG00000085838	Chn1os1	8.62162	ENSMUSG00000037152	Ndufc1	3.10462				ENSMUSG00000060032	H2afj	3.47177
ENSMUSG00000079671	2610203C22Rik	3.04054	ENSMUSG00000072791	Abcb5	34300	ENSMUSG00000085890	Tnfsf13os	2.15642	ENSMUSG00000037225	Fgf2	3.34553				ENSMUSG00000060212	Pcnx2	41.0462
ENSMUSG00000079845	Xlr4a	60.5985	ENSMUSG00000072809	9330160F10Rik	2.45946	ENSMUSG00000085918	Gm13032	34.7383	ENSMUSG00000037306	Man1c1	2.57121				ENSMUSG00000060224	Pyroxd2	4.9
ENSMUSG00000080268	Brms1	2.79064	ENSMUSG00000072845	Tmprss11a	12.1765	ENSMUSG00000085944	1700003D09Rik	8.75926	ENSMUSG00000037348	Paqr7	4.33803				ENSMUSG00000060402	Chst8	3.63
ENSMUSG00000081119	Gm14601	14.1034	ENSMUSG00000072849	Serpina1e	47.2989	ENSMUSG00000085990	Gm16731	2.05925	ENSMUSG00000037366	Pafah2	4.03226				ENSMUSG00000060459	Kng2	20.6316
ENSMUSG00000081965	Gm11620	9.92	ENSMUSG00000072875	Gpr27	2.98876	ENSMUSG00000085996	A830012C17Rik	9.76316	ENSMUSG00000037379	Spon2	7.76714				ENSMUSG00000060538	Tmem219	2.19048
ENSMUSG00000082361	Btc	2.2	ENSMUSG00000072962	Gm16401	6.06977	ENSMUSG00000086032	Gm15929	3.61777	ENSMUSG00000037419	Endod1	2.1733				ENSMUSG00000060568	Fam78b	11.8514
ENSMUSG00000082791	Gm4875	3.07895	ENSMUSG00000073067	9130019P16Rik	3.07087	ENSMUSG00000086170	Gm12144	8.91603	ENSMUSG00000037579	Kcnh3	4.91525				ENSMUSG00000060572	Mfap2	9.65327
ENSMUSG00000082956	Naip3	9.55882	ENSMUSG00000073399	Trim40	25.0909	ENSMUSG00000086260	Gm16259	2.20833	ENSMUSG00000037594	BC022687	3.81176				ENSMUSG00000060735	Rxfp3	36.5
ENSMUSG00000084835	Gm12352	2.3375	ENSMUSG00000073403	Gm10499	7.38372	ENSMUSG00000086289	Gm16933	5.40196	ENSMUSG00000037613	Tnfrsf23	6.75472				ENSMUSG00000060988	Galnt13	69.9667
ENSMUSG00000084890	A830036E02Rik	17.8491	ENSMUSG00000073405	H2-T-ps	2.10169	ENSMUSG00000086381	AV064505	120.929	ENSMUSG00000037624	Kcnk2	3.64887				ENSMUSG00000061046	Haghl	2.26144
ENSMUSG00000085023	Gm12744	17.5625	ENSMUSG00000073406	H2-Bl	3.34375	ENSMUSG00000086536	Gm12264	2.05979	ENSMUSG00000037710	Cisd1	5.59375				ENSMUSG00000061086	Myl4	3.08824
ENSMUSG00000085148	Mir22hg	2.71023	ENSMUSG00000073418	C4b	3.44298	ENSMUSG00000086544	Chn1os3	4.19608	ENSMUSG00000037816	Fbxw17	6.9668				ENSMUSG00000061111	Fam195b	2.79479
ENSMUSG00000085278	Gm12841	2.32558	ENSMUSG00000073437	D330041H03Rik	2.07039	ENSMUSG00000086656	Gm15701	31.3611	ENSMUSG00000037852	Cpe	3.57212				ENSMUSG00000061175	Fnip2	3.11048
ENSMUSG00000085360	Arhgap27os2	4.49448	ENSMUSG00000073489	Ifi204	5.85598	ENSMUSG00000086711	Gm15482	14.5484	ENSMUSG00000037946	Fgd3	63.3571				ENSMUSG00000061411	Nol4l	3.01365
ENSMUSG00000085498	Gm14023	58.5697	ENSMUSG00000073490	Ifi207	9.35556	ENSMUSG00000086718	Gm16069	2.36464	ENSMUSG00000037960	Card19	2.472				ENSMUSG00000061461	Smim20	3.44755
ENSMUSG00000085505	Gm12868	2.25851	ENSMUSG00000073802	Cdkn2b	3.76744	ENSMUSG00000086791	Gm12147	22.0833	ENSMUSG00000037966	Ninj1	2.06392				ENSMUSG00000061576	Dpp6	3.41096
ENSMUSG00000085533	Gm12146	10.2117	ENSMUSG00000074006	Omp	5.39053	ENSMUSG00000087194	Skint6	76.2222	ENSMUSG00000037979	Ccdc92	5.01429				ENSMUSG00000061601	Pclo	13.2222
ENSMUSG00000085585	Gm12223	12850	ENSMUSG00000074300	BC030870	28.0719	ENSMUSG00000087230	Mroh3	5.3494	ENSMUSG00000037995	Igsf9	3.69608				ENSMUSG00000061838	Suclg2	2.19275
ENSMUSG00000085595	Gm16090	3.33846	ENSMUSG00000074445	Sprr2a3	169.216	ENSMUSG00000087233	Gm43213	3.6383	ENSMUSG00000038028	Tigar	3.15152				ENSMUSG00000062098	Btbd3	4.38045
ENSMUSG00000085810	Gm16325	84.3333	ENSMUSG00000074465	Gm10701	118.962	ENSMUSG00000087365	C430049B03Rik	7.73171	ENSMUSG00000038074	Fkbp14	3.68218				ENSMUSG00000062257	Opcml	24.1148
ENSMUSG00000085830	Grin1os	4.64151	ENSMUSG00000074625	Arhgap40	3.77707	ENSMUSG00000087389	Gm15592	3.88194	ENSMUSG00000038119	Cdon	6.09269				ENSMUSG00000062309	Rpp25	12.6875
ENSMUSG00000085890	Tnfsf13os	2.51955	ENSMUSG00000074715	Ccl28	8.32005	ENSMUSG00000087612	A230005M16Rik	2.78212	ENSMUSG00000038141	Tmem181a	2.04367				ENSMUSG00000062345	Serpinb2	345.274
ENSMUSG00000085918	Gm13032	24.954	ENSMUSG00000074738	Fndc10	3.61603	ENSMUSG00000087677	Gm15226	39.3606	ENSMUSG00000038156	Spon1	7.95238				ENSMUSG00000062593	Lilrb4a	51.3571
ENSMUSG00000085944	1700003D09Rik	3.74074	ENSMUSG00000074813	Gm14005	4.26585	ENSMUSG00000087698	Gm13031	59.5594	ENSMUSG00000038178	Slc43a2	2.39474				ENSMUSG00000062960	Kdr	2.92927
ENSMUSG00000085990	Gm16731	2.25135	ENSMUSG00000074892	B3galt5	217.764	ENSMUSG00000089671	Gm16537	7.36111	ENSMUSG00000038235	F11r	11.9943				ENSMUSG00000062963	Ufc1	2.37908
ENSMUSG00000086032	Gm15929	3.45882	ENSMUSG00000074896	Ifit3	3.39474	ENSMUSG00000089675	Ugt1a8	4.35943	ENSMUSG00000038236	Hoxa7	3.78125				ENSMUSG00000062981	Mrpl42	2.2844
ENSMUSG00000086170	Gm12144	8.37405	ENSMUSG00000074912	Gm14207	2.27052	ENSMUSG00000089832	Shkbp1	4.15341	ENSMUSG00000038239	Hrc	4.20635				ENSMUSG00000062991	Nrg1	3.63836
ENSMUSG00000086289	Gm16933	4.69118	ENSMUSG00000075602	Ly6a	13.8333	ENSMUSG00000089876	Tmem102	2.83784	ENSMUSG00000038244	Mical2	3.56739				ENSMUSG00000063011	Msln	117.231
ENSMUSG00000086381	AV064505	69.4286	ENSMUSG00000075611	Gm11545	3.24823	ENSMUSG00000089943	Ugt1a5	4.27496	ENSMUSG00000038264	Sema7a	2.42857				ENSMUSG00000063171	Rps4l	2.49438
ENSMUSG00000086432	B430119L08Rik	60250	ENSMUSG00000076060	Mir704	2.63889	ENSMUSG00000089950	Gm16215	58.0838	ENSMUSG00000038312	Edem2	2.73927				ENSMUSG00000063354	Slc39a4	3.96
ENSMUSG00000086656	Gm15701	27.6944	ENSMUSG00000076128	Mir686	3.36111	ENSMUSG00000089960	Ugt1a1	3.87461	ENSMUSG00000038352	Arl5c	4.18261				ENSMUSG00000063430	Wscd2	4.35519
ENSMUSG00000086711	Gm15482	11.5242	ENSMUSG00000076441	Ass1	10.0718	ENSMUSG00000090035	Galnt4	2.67496	ENSMUSG00000038372	Gmds	2.67089				ENSMUSG00000063626	Unc5d	2.7381
ENSMUSG00000086791	Gm12147	22.25	ENSMUSG00000078439	Smim24	4.03797	ENSMUSG00000090124	Ugt1a7c	4.76271	ENSMUSG00000038375	Trp53inp2	3.83237				ENSMUSG00000063687	Pcdhb5	4.0098
ENSMUSG00000087194	Skint6	85	ENSMUSG00000078440	Dohh	2.0165	ENSMUSG00000090145	Ugt1a6b	3.9613	ENSMUSG00000038400	Pmepa1	3.55573				ENSMUSG00000063856	Gpx1	3.92476
ENSMUSG00000087230	Mroh3	4.39759	ENSMUSG00000078566	Bnip3	2.64807	ENSMUSG00000090152	Gm16285	3.64583	ENSMUSG00000038429	Usp5	2.41719				ENSMUSG00000063903	Klk1	312
ENSMUSG00000087233	Gm43213	4.39362	ENSMUSG00000078606	Gm4070	7.44444	ENSMUSG00000090165	Ugt1a10	4.30389	ENSMUSG00000038453	Srcin1	4.76744				ENSMUSG00000063904	Dpp3	4.00326
ENSMUSG00000087365	C430049B03Rik	24.2683	ENSMUSG00000078612	1700024P16Rik	9.04115	ENSMUSG00000090171	Ugt1a2	4.22375	ENSMUSG00000038457	Tmem255b	6.20902				ENSMUSG00000064080	Fbln2	30.3329
ENSMUSG00000087389	Gm15592	4.70833	ENSMUSG00000078664	Sprr2a1	45.9082	ENSMUSG00000090175	Ugt1a9	4.29505	ENSMUSG00000038473	Nos1ap	4.5461				ENSMUSG00000064115	Cadm2	9.92857
ENSMUSG00000087612	A230005M16Rik	2.24022	ENSMUSG00000078713	Tomm5	2.85556	ENSMUSG00000090202	4930503B20Rik	28.8235	ENSMUSG00000038486	Sv2a	4.65789				ENSMUSG00000064120	Mocs1	2.09506
ENSMUSG00000087677	Gm15226	28.7712	ENSMUSG00000078719	Msmp	2.34286	ENSMUSG00000090214	Gm15657	12.1765	ENSMUSG00000038527	C1rl	2.46602				ENSMUSG00000064193	Gm4735	2.99038
ENSMUSG00000087687	Pet100	3.39521	ENSMUSG00000078776	9530053A07Rik	7.62637	ENSMUSG00000090231	Cfb	27.1095	ENSMUSG00000038600	Atp6v0a4	4.04762				ENSMUSG00000064210	Ano6	2.29945
ENSMUSG00000087698	Gm13031	46.049	ENSMUSG00000078793	Gm5155	46.7532	ENSMUSG00000090236	Car15	3.19277	ENSMUSG00000038628	Polr3k	2.72137				ENSMUSG00000064330	Pde6h	13.1852
ENSMUSG00000089671	Gm16537	5.73611	ENSMUSG00000078813	Leng1	3.52481	ENSMUSG00000090254	Gm1965	40600	ENSMUSG00000038690	Atp5j2	2.57662				ENSMUSG00000064372	mt-Tp	5.08397
ENSMUSG00000089675	Ugt1a8	6.11744	ENSMUSG00000078908	Mon1b	2.35144	ENSMUSG00000090272	Mndal	5.53913	ENSMUSG00000038725	Pkhd1l1	44.292				ENSMUSG00000066456	Hmgn3	4.58475
ENSMUSG00000089697	Gm15947	11.0526	ENSMUSG00000078920	Ifi47	2.66387	ENSMUSG00000090946	Ccdc71l	6.62009	ENSMUSG00000038732	Mboat1	3.05263				ENSMUSG00000066829	Zfp810	3.62667
ENSMUSG00000089832	Shkbp1	3.82955	ENSMUSG00000078942	Naip6	6.49338	ENSMUSG00000091297	Gm8439	11700	ENSMUSG00000038776	Ephx1	2.60162				ENSMUSG00000067071	Hes6	2.83133
ENSMUSG00000089876	Tmem102	3.04955	ENSMUSG00000078945	Naip2	29.2069	ENSMUSG00000091367	Gm17711	2.53521	ENSMUSG00000038803	Ost4	2.4994				ENSMUSG00000067158	Col4a4	4.65301
ENSMUSG00000089943	Ugt1a5	5.99825	ENSMUSG00000079015	Serpina1c	34250	ENSMUSG00000091423	Gm17509	2.89661	ENSMUSG00000038816	Ctnnal1	2.68495				ENSMUSG00000067780	Pi15	8.72719
ENSMUSG00000089960	Ugt1a1	5.36677	ENSMUSG00000079053	Gm14010	2.32653	ENSMUSG00000091549	Gm6548	2.29707	ENSMUSG00000038843	Gcnt1	13.8434				ENSMUSG00000067825	Pex26	4.9614
ENSMUSG00000089991	Gm16332	4.21304	ENSMUSG00000079197	Psme2	3.09484	ENSMUSG00000091575	2010016I18Rik	3.48045	ENSMUSG00000038859	Baiap2l1	4.05499				ENSMUSG00000068122	Agtr2	118.097
ENSMUSG00000090035	Galnt4	2.82416	ENSMUSG00000079339	Ifit1bl1	163.591	ENSMUSG00000091659	Gm17099	12.4217	ENSMUSG00000038880	Mrps34	2.1549				ENSMUSG00000068263	Efcc1	3.6358
ENSMUSG00000090062	Galnt6os	12.2941	ENSMUSG00000079426	Arpc4	2.18118	ENSMUSG00000091705	H2-Q2	2.44479	ENSMUSG00000039004	Bmp6	11.0903				ENSMUSG00000068264	Ap5s1	3.38235
ENSMUSG00000090124	Ugt1a7c	6.38559	ENSMUSG00000079451	Tmprss11g	111.988	ENSMUSG00000092200	Tnxa	13.96	ENSMUSG00000039007	Cpq	2.77377				ENSMUSG00000068335	Dok1	4.11321
ENSMUSG00000090145	Ugt1a6b	5.4226	ENSMUSG00000079492	Gm11127	6.59375	ENSMUSG00000092220	Gm20528	3.84426	ENSMUSG00000039016	Timm8b	2.74672				ENSMUSG00000068566	Myadm	2.15105
ENSMUSG00000090152	Gm16285	2.96875	ENSMUSG00000079507	H2-Q1	2.98649	ENSMUSG00000092283	Gm20412	22.9392	ENSMUSG00000039031	Arhgap18	10.2594				ENSMUSG00000068617	Efcab1	45.1429
ENSMUSG00000090165	Ugt1a10	6.00353	ENSMUSG00000079523	Tmsb10	2.22704	ENSMUSG00000092395	Gm20463	3.61745	ENSMUSG00000039058	Ak5	7.57619				ENSMUSG00000068749	Psma5	2.27798
ENSMUSG00000090171	Ugt1a2	5.88812	ENSMUSG00000079620	Muc4	18.749	ENSMUSG00000092511	Gm20547	24.077	ENSMUSG00000039116	Adgrg6	7.52113				ENSMUSG00000068758	Il3ra	3.81579
ENSMUSG00000090175	Ugt1a9	6.03534	ENSMUSG00000080268	Brms1	2.61576	ENSMUSG00000093989	Rnasek	2.62264	ENSMUSG00000039217	Il18	12.9636				ENSMUSG00000068874	Selenbp1	3.29514
ENSMUSG00000090202	4930503B20Rik	33.9412	ENSMUSG00000081119	Gm14601	11.1379	ENSMUSG00000095026	Gm3336	3.26667	ENSMUSG00000039221	Rpl22l1	2.01098				ENSMUSG00000069763	Tmem100	4.7884
ENSMUSG00000090214	Gm15657	12.1176	ENSMUSG00000081512	Gm15821	3.35426	ENSMUSG00000095115	Itpripl2	2.52034	ENSMUSG00000039230	Tbcd	2.31987				ENSMUSG00000069920	B3gnt9	4.27011
ENSMUSG00000090222	Ifi203-ps	5.39416	ENSMUSG00000082956	Naip3	13.1569	ENSMUSG00000095687	Rnaset2a	3.42045	ENSMUSG00000039239	Tgfb2	3.42179				ENSMUSG00000070000	Fcho1	34
ENSMUSG00000090231	Cfb	33.6524	ENSMUSG00000084890	A830036E02Rik	15.0377	ENSMUSG00000096035	Gm1045	42.6	ENSMUSG00000039246	Lyplal1	2.448				ENSMUSG00000070436	Serpinh1	3.48894
ENSMUSG00000090254	Gm1965	14050	ENSMUSG00000085009	Gm12977	2.29603	ENSMUSG00000096221	1500002C15Rik	3.77202	ENSMUSG00000039252	Lgi2	9.08889				ENSMUSG00000070462	Mesdc1	2.92457
ENSMUSG00000090272	Mndal	16.8296	ENSMUSG00000085023	Gm12744	14.9856	ENSMUSG00000096979	Gm26880	7.34454	ENSMUSG00000039254	Pomt1	3.93921				ENSMUSG00000070780	Rbm47	8.10667
ENSMUSG00000090357	Gm17077	2.02795	ENSMUSG00000085278	Gm12841	2.58915	ENSMUSG00000097315	Gm26568	3.12919	ENSMUSG00000039257	Vstm2b	8.98214				ENSMUSG00000070866	Zfp804a	8.86916
ENSMUSG00000090486	BC035947	3.19403	ENSMUSG00000085360	Arhgap27os2	4.38398	ENSMUSG00000097419	Gm26666	3.92564	ENSMUSG00000039270	Megf9	2.05061				ENSMUSG00000070867	Trabd2b	7.62812
ENSMUSG00000090555	Gm8893	155.064	ENSMUSG00000085498	Gm14023	39.6485	ENSMUSG00000097445	Gm26631	2.90506	ENSMUSG00000039294	BC017643	2.12249				ENSMUSG00000071265	1700086L19Rik	8.125
ENSMUSG00000090588	Gm9573	4.27907	ENSMUSG00000085533	Gm12146	12.7299	ENSMUSG00000097454	Gm26892	101.702	ENSMUSG00000039357	Fut11	2.476				ENSMUSG00000071547	Nt5dc2	3.0733
ENSMUSG00000090877	Hspa1b	2.39574	ENSMUSG00000085595	Gm16090	3.83846	ENSMUSG00000097458	Gm26697	11.2059	ENSMUSG00000039405	Prss23	12.8478				ENSMUSG00000071604	Fam189a2	2.917
ENSMUSG00000090946	Ccdc71l	13.4827	ENSMUSG00000085810	Gm16325	61.25	ENSMUSG00000097603	A430010J10Rik	8.53333	ENSMUSG00000039452	Snx22	3.03561				ENSMUSG00000071679	Zcchc16	7.96552
ENSMUSG00000091297	Gm8439	10500	ENSMUSG00000085894	Gm15832	2.68245	ENSMUSG00000097656	Gm26712	2.66102	ENSMUSG00000039474	Wfs1	2.00932				ENSMUSG00000071984	Fndc1	6.44444
ENSMUSG00000091367	Gm17711	3.16197	ENSMUSG00000085918	Gm13032	24.878	ENSMUSG00000097658	Gm16755	2.37762	ENSMUSG00000039497	Dse	2.10304				ENSMUSG00000072720	Myo18b	96.1484
ENSMUSG00000091479	Gm17035	3.5523	ENSMUSG00000085944	1700003D09Rik	4.31481	ENSMUSG00000097680	Gm26642	2.53072	ENSMUSG00000039519	Cyp7b1	3.31353				ENSMUSG00000072941	Sod3	4.65945
ENSMUSG00000091549	Gm6548	2.06276	ENSMUSG00000085990	Gm16731	2.36625	ENSMUSG00000097724	Gm26850	3.51705	ENSMUSG00000039578	Ccser1	17.8947				ENSMUSG00000073016	Uprt	2.36579
ENSMUSG00000091659	Gm17099	20.3614	ENSMUSG00000086032	Gm15929	3.5578	ENSMUSG00000097749	Gm16938	5.05	ENSMUSG00000039683	Sdk1	3.89492				ENSMUSG00000073418	C4b	12.1343
ENSMUSG00000091705	H2-Q2	3.62145	ENSMUSG00000086170	Gm12144	10.313	ENSMUSG00000097774	Gm26565	2.82317	ENSMUSG00000039713	Plekhg5	3.12575				ENSMUSG00000073616	Myeov2	2.56357
ENSMUSG00000092035	Peg10	3.74829	ENSMUSG00000086260	Gm16259	2.25	ENSMUSG00000097800	B230344G16Rik	2.30303	ENSMUSG00000039745	Htatip2	6.20408				ENSMUSG00000073643	Wdfy1	2.9543
ENSMUSG00000092060	Bend4	3.65147	ENSMUSG00000086289	Gm16933	5.94118	ENSMUSG00000097860	Gm26857	4.08906	ENSMUSG00000039747	Orai2	2.15484				ENSMUSG00000073652	Apol7d	2.33012
ENSMUSG00000092200	Tnxa	14.58	ENSMUSG00000086381	AV064505	99.1429	ENSMUSG00000097923	Gm26577	8.15789	ENSMUSG00000039774	Galnt12	4.89231				ENSMUSG00000073679	Mxra8os	3.64108
ENSMUSG00000092220	Gm20528	4.53279	ENSMUSG00000086432	B430119L08Rik	16250	ENSMUSG00000097993	Ptprv	4.78846	ENSMUSG00000039787	Cercam	4.96454				ENSMUSG00000074063	Osgin1	2.68387
ENSMUSG00000092283	Gm20412	18.7738	ENSMUSG00000086472	Gm16172	2.30409	ENSMUSG00000098332	2310009A05Rik	2.07258	ENSMUSG00000039798	2600006K01Rik	4.11864				ENSMUSG00000074064	Mlycd	2.25688
ENSMUSG00000092395	Gm20463	3.08054	ENSMUSG00000086544	Chn1os3	2.18301	ENSMUSG00000098465	Mir1668	8.05556	ENSMUSG00000039813	Tbc1d2	3.73846				ENSMUSG00000074182	Znhit6	2.18632
ENSMUSG00000092471	Cyp21a2-ps	12.5833	ENSMUSG00000086656	Gm15701	38.5833	ENSMUSG00000098489	Mir7678	4.31944	ENSMUSG00000039831	Arhgap29	4.72706				ENSMUSG00000074207	Adh1	19.5209
ENSMUSG00000092511	Gm20547	29.4663	ENSMUSG00000086711	Gm15482	8.28226	ENSMUSG00000098597	Mir6418	2.73224	ENSMUSG00000039842	Mcph1	2.58706				ENSMUSG00000074345	Tnfaip8l3	18.5692
ENSMUSG00000092609	Gm20481	2.15343	ENSMUSG00000086791	Gm12147	21.8333	ENSMUSG00000099066	Mir6978	20500	ENSMUSG00000039887	Alg14	2.65035				ENSMUSG00000074364	Ehd2	2.76151
ENSMUSG00000094504	Gm5294	6.16667	ENSMUSG00000086898	Itpr3os	2.07886	ENSMUSG00000099519	Gm29253	2.58681	ENSMUSG00000039958	Etfbkmt	2.82477				ENSMUSG00000074457	S100a16	3.67308
ENSMUSG00000095026	Gm3336	4.8	ENSMUSG00000087194	Skint6	39.6667	ENSMUSG00000099590	C330022C24Rik	4.87027	ENSMUSG00000040016	Ptger3	2.72104				ENSMUSG00000074715	Ccl28	12.9375
ENSMUSG00000095115	Itpripl2	5.26767	ENSMUSG00000087230	Mroh3	3.75904	ENSMUSG00000100280	Gm28417	3.44395	ENSMUSG00000040111	Gramd1b	4.11972				ENSMUSG00000074813	Gm14005	12.7727
ENSMUSG00000095649	Gm8979	6.93333	ENSMUSG00000087233	Gm43213	4.12766	ENSMUSG00000100627	A830008E24Rik	37.4706	ENSMUSG00000040133	Gpr176	5.89583				ENSMUSG00000074971	Fibin	13.3333
ENSMUSG00000095687	Rnaset2a	5.02652	ENSMUSG00000087260	Lamtor5	2.01186	ENSMUSG00000101304	Plet1os	6.74145	ENSMUSG00000040136	Abcc8	42.1429				ENSMUSG00000075486	Commd6	2.02871
ENSMUSG00000096035	Gm1045	82.6	ENSMUSG00000087364	Gm13398	41.7974	ENSMUSG00000101362	Mrgprb9-ps	36100	ENSMUSG00000040158	Tax1bp3	2.44949				ENSMUSG00000075520	Malrd1	11250
ENSMUSG00000096215	Smim22	2.76404	ENSMUSG00000087365	C430049B03Rik	16.1463	ENSMUSG00000101406	Gm29200	10.2355	ENSMUSG00000040212	Emp3	3.64593				ENSMUSG00000075593	Gal3st4	5.21154
ENSMUSG00000096221	1500002C15Rik	3.03109	ENSMUSG00000087389	Gm15592	5.18056	ENSMUSG00000102299	Gm37539	7.11053	ENSMUSG00000040264	Gbp2b	2.5697				ENSMUSG00000075602	Ly6a	12.9348
ENSMUSG00000096780	Tmem181b-ps	2.08163	ENSMUSG00000087612	A230005M16Rik	2.72067	ENSMUSG00000102336	Gm37233	6.51799	ENSMUSG00000040280	Ndufa4l2	4.94366				ENSMUSG00000076240	Mir702	2.37059
ENSMUSG00000096979	Gm26880	4.39496	ENSMUSG00000087677	Gm15226	21.3786	ENSMUSG00000102433	Gm38050	8.04478	ENSMUSG00000040296	Ddx58	2.66726				ENSMUSG00000078117	Gm16485	2.40809
ENSMUSG00000097209	AU022754	2.89714	ENSMUSG00000087687	Pet100	2.08982	ENSMUSG00000102476	Gm37245	3.84906	ENSMUSG00000040374	Pex2	2.36				ENSMUSG00000078348	Sf3b5	2.18501
ENSMUSG00000097315	Gm26568	2.64593	ENSMUSG00000087698	Gm13031	40.4266	ENSMUSG00000102644	Thap6	2.39765	ENSMUSG00000040385	Ppp1ca	2.37704				ENSMUSG00000078502	Gm13212	2.46097
ENSMUSG00000097373	Gm26877	58.8822	ENSMUSG00000089671	Gm16537	6.375	ENSMUSG00000102725	Gm37939	2.27848	ENSMUSG00000040447	Spns2	18.6382				ENSMUSG00000078570	1110065P20Rik	2.87879
ENSMUSG00000097445	Gm26631	3.06329	ENSMUSG00000089675	Ugt1a8	8.30071	ENSMUSG00000103067	Gm30414	5.56195	ENSMUSG00000040451	Sgms1	3.6517				ENSMUSG00000078656	Vps25	2.45723
ENSMUSG00000097454	Gm26892	69.2823	ENSMUSG00000089728	Clec2f	2.51807	ENSMUSG00000103270	Gm37915	3.48611	ENSMUSG00000040473	Cfap69	10.1405				ENSMUSG00000078695	Cisd3	2.21739
ENSMUSG00000097458	Gm26697	7.08824	ENSMUSG00000089832	Shkbp1	4.35227	ENSMUSG00000103730	Gm38316	2.55833	ENSMUSG00000040483	Xaf1	3.82775				ENSMUSG00000078713	Tomm5	2.34444
ENSMUSG00000097471	5830432E09Rik	6.75789	ENSMUSG00000089943	Ugt1a5	8.1979	ENSMUSG00000103948	4930594C11Rik	4.43	ENSMUSG00000040543	Pitpnm3	4.43939				ENSMUSG00000078816	Prkcg	2.18901
ENSMUSG00000097680	Gm26642	2.72296	ENSMUSG00000089960	Ugt1a1	7.33072	ENSMUSG00000104173	Gm37703	3.13953	ENSMUSG00000040548	Tex2	2.42405				ENSMUSG00000079017	Ifi27l2a	5.90625
ENSMUSG00000097724	Gm26850	2.59091	ENSMUSG00000090035	Galnt4	3.19361	ENSMUSG00000104937	Gm43057	58.8822	ENSMUSG00000040562	Gstm2	4.94068				ENSMUSG00000079018	Ly6c1	16.3207
ENSMUSG00000097749	Gm16938	6.35	ENSMUSG00000090124	Ugt1a7c	8.26695	ENSMUSG00000105053	Gm43064	4.65559	ENSMUSG00000040605	Bace2	46.3962				ENSMUSG00000079138	Gm8818	5.06061
ENSMUSG00000097774	Gm26565	3.06402	ENSMUSG00000090145	Ugt1a6b	7.43963	ENSMUSG00000105415	Gm44364	2.9646	ENSMUSG00000040612	Ildr2	18.3248				ENSMUSG00000079334	Nat6	2.31518
ENSMUSG00000097854	Gm26602	2.37458	ENSMUSG00000090165	Ugt1a10	8.12721	ENSMUSG00000105703	Gm43305	14.3056	ENSMUSG00000040648	Ppip5k2	2.82931				ENSMUSG00000079465	Col4a3	3.63109
ENSMUSG00000097860	Gm26857	4.20356	ENSMUSG00000090171	Ugt1a2	7.99828	ENSMUSG00000105826	Gm43819	4.34959	ENSMUSG00000040690	Col16a1	2.48872				ENSMUSG00000079484	Phyhd1	2.37695
ENSMUSG00000097923	Gm26577	9.34211	ENSMUSG00000090175	Ugt1a9	8.17138	ENSMUSG00000105900	Gm43240	4.05455	ENSMUSG00000040701	Ap1g2	2.66667				ENSMUSG00000079620	Muc4	11.2593
ENSMUSG00000098192	Gm3534	3.15714	ENSMUSG00000090202	4930503B20Rik	23.2353	ENSMUSG00000105932	Mir6925	2.50549	ENSMUSG00000040703	Cyp2s1	12.1648				ENSMUSG00000079685	Ulbp1	26.8889
ENSMUSG00000098207	Arl14	3.75407	ENSMUSG00000090214	Gm15657	13.5294	ENSMUSG00000105954	Gm42793	5.13725	ENSMUSG00000040713	Creg1	5.5357				ENSMUSG00000079834	Tmlhe	2.2241
ENSMUSG00000098332	2310009A05Rik	2.04839	ENSMUSG00000090222	Ifi203-ps	3.21168	ENSMUSG00000106082	4930404A12Rik	4.29193	ENSMUSG00000040722	Scamp5	2.37795				ENSMUSG00000081223	Gm12247	7.6875
ENSMUSG00000098465	Mir1668	4.55556	ENSMUSG00000090231	Cfb	37.869	ENSMUSG00000106990	Gm42547	2.02924	ENSMUSG00000040808	S100g	233.923				ENSMUSG00000082361	Btc	24.45
ENSMUSG00000098489	Mir7678	5.44444	ENSMUSG00000090254	Gm1965	22100	ENSMUSG00000107012	4930528J11Rik	15.9815	ENSMUSG00000040811	Eml2	6.23679				ENSMUSG00000084523	Mir1903	8.10127
ENSMUSG00000098597	Mir6418	2.38251	ENSMUSG00000090272	Mndal	13.2713	ENSMUSG00000107040	Gm43791	3.59722	ENSMUSG00000040829	Zmynd15	15.5644				ENSMUSG00000084783	Gm15419	3.87216
ENSMUSG00000098826	Mir7677	2.33945	ENSMUSG00000090555	Gm8893	38.3738	ENSMUSG00000107134	Gm42528	13.4127	ENSMUSG00000040867	Begain	2.6092				ENSMUSG00000084970	1700060J05Rik	2.90888
ENSMUSG00000099066	Mir6978	18850	ENSMUSG00000090946	Ccdc71l	10.3611	ENSMUSG00000107317	Gm19719	5.48	ENSMUSG00000040875	Osbpl10	2.01429				ENSMUSG00000085227	6330418K02Rik	4.5443
ENSMUSG00000099590	C330022C24Rik	4.72432	ENSMUSG00000091367	Gm17711	3.20423	ENSMUSG00000107470	Gm3375	9.125	ENSMUSG00000040883	Tmem205	2.62573				ENSMUSG00000085314	Gm14866	53.493
ENSMUSG00000100113	Gm28592	2.79573	ENSMUSG00000091423	Gm17509	2.01604	ENSMUSG00000107634	Gm43956	2.56303	ENSMUSG00000040998	Npnt	4.22977				ENSMUSG00000085526	Gm16083	3.24576
ENSMUSG00000100627	A830008E24Rik	21.8235	ENSMUSG00000091479	Gm17035	3.5251	ENSMUSG00000107728	Gm43949	6.85227	ENSMUSG00000041037	Irgq	2.13089				ENSMUSG00000085560	C230038L03Rik	17.5263
ENSMUSG00000101304	Plet1os	6.39084	ENSMUSG00000091549	Gm6548	3.02092	ENSMUSG00000107842	Gm44089	129.676	ENSMUSG00000041046	Ramp3	4.46414				ENSMUSG00000085584	Rgag1	19.2727
ENSMUSG00000101362	Mrgprb9-ps	12150	ENSMUSG00000091659	Gm17099	22.7229	ENSMUSG00000107869	Gm29848	3.69512	ENSMUSG00000041084	Ostc	2.85192				ENSMUSG00000085766	2810430I11Rik	5.26984
ENSMUSG00000101406	Gm29200	17.1467	ENSMUSG00000091705	H2-Q2	3.69085	ENSMUSG00000108084	Gm7932	25.28	ENSMUSG00000041231	Ublcp1	2.70607				ENSMUSG00000085918	Gm13032	28.9091
ENSMUSG00000102299	Gm37539	9.58421	ENSMUSG00000092035	Peg10	3.09056	ENSMUSG00000108126	Gm43909	9.8	ENSMUSG00000041351	Rap1gap	2.83951				ENSMUSG00000086083	Gm15829	4.168
ENSMUSG00000102336	Gm37233	4.13669	ENSMUSG00000092060	Bend4	3.42895	ENSMUSG00000108596	Itgam	164.3	ENSMUSG00000041362	Shtn1	16.9903				ENSMUSG00000086234	Usp46os2	2.59302
ENSMUSG00000102433	Gm38050	22.3433	ENSMUSG00000092200	Tnxa	12.58	ENSMUSG00000108793	Gm45213	3.6	ENSMUSG00000041390	Mdfic	2.56896				ENSMUSG00000086373	Gm11978	3.90141
ENSMUSG00000102725	Gm37939	2.29241	ENSMUSG00000092220	Gm20528	6.63934	ENSMUSG00000108806	Gm44729	3.74769	ENSMUSG00000041481	Serpina3g	4.36434				ENSMUSG00000086472	Gm16172	2.98137
ENSMUSG00000103067	Gm30414	3.4469	ENSMUSG00000092243	Gm7030	2.29143	ENSMUSG00000109244	Gm44751	5.12632	ENSMUSG00000041540	Sox5	2.46493				ENSMUSG00000086514	Gm11747	3.89873
ENSMUSG00000103440	Gm37131	5.24096	ENSMUSG00000092283	Gm20412	22.025	ENSMUSG00000109251	E230032D23Rik	5.38298	ENSMUSG00000041607	Mbp	3.3457				ENSMUSG00000086560	Gm13372	7.75172
ENSMUSG00000103730	Gm38316	3.125	ENSMUSG00000092395	Gm20463	3.42282	ENSMUSG00000109735	Gm45667	16.3636	ENSMUSG00000041609	Ccdc64	6.89423				ENSMUSG00000086718	Gm16069	2.03636
ENSMUSG00000103948	4930594C11Rik	5.93	ENSMUSG00000092471	Cyp21a2-ps	9.58333	ENSMUSG00000109901	Chmp1b	2.03695	ENSMUSG00000041625	Ggact	2.98347				ENSMUSG00000086720	Plxna4os3	17.8636
ENSMUSG00000104173	Gm37703	6.02326	ENSMUSG00000092511	Gm20547	32.7765	ENSMUSG00000109973	Gm45397	21.9318	ENSMUSG00000041650	Pcca	3.45886				ENSMUSG00000086935	Gm15956	2.19737
ENSMUSG00000104937	Gm43057	77.4451	ENSMUSG00000092550	Gm20496	3.12626	ENSMUSG00000110148	RP23-106I21.5	4.74725	ENSMUSG00000041654	Slc39a11	4.91919				ENSMUSG00000086962	Gm12248	16.0045
ENSMUSG00000105053	Gm43064	5.18127	ENSMUSG00000093042	Mir3109	2.73874	ENSMUSG00000110386	Gm42031	12.6937	ENSMUSG00000041697	Cox6a1	2.57783				ENSMUSG00000086968	4933431E20Rik	3.17797
ENSMUSG00000105415	Gm44364	3.28673	ENSMUSG00000093327	Mir5107	4.58182	ENSMUSG00000110428	RP23-431O7.8	3.1791	ENSMUSG00000041729	Coro2b	4.2623				ENSMUSG00000086998	Gm16033	3.40909
ENSMUSG00000105703	Gm43305	5.81481	ENSMUSG00000095026	Gm3336	4.5	ENSMUSG00000110520	RP24-420C18.1	36.8571	ENSMUSG00000041736	Tspo	6.7493				ENSMUSG00000087002	Gm16277	52.4706
ENSMUSG00000105826	Gm43819	6.07317	ENSMUSG00000095115	Itpripl2	4.58244	ENSMUSG00000110605	RP24-122D14.3	2.4403	ENSMUSG00000041757	Plekha6	4.46455				ENSMUSG00000087047	1700110K17Rik	4.98438
ENSMUSG00000105899	Gm44383	27.4725	ENSMUSG00000095687	Rnaset2a	5.40152	ENSMUSG00000110720	RP24-236E2.1	6.35526	ENSMUSG00000041779	Tram2	3.9338				ENSMUSG00000087302	Sox5os1	3.75676
ENSMUSG00000105900	Gm43240	3.81212	ENSMUSG00000096035	Gm1045	58.7333	ENSMUSG00000110899	RP23-284E19.10	2.62394	ENSMUSG00000041794	Myrip	14.9684				ENSMUSG00000087356	Gm13856	2.32796
ENSMUSG00000105954	Gm42793	15.5686	ENSMUSG00000096221	1500002C15Rik	3.4715	ENSMUSG00000111394	RP23-320D23.6	2.25452	ENSMUSG00000041797	Abca9	2.33101				ENSMUSG00000087394	Gm12945	2.98592
ENSMUSG00000106082	4930404A12Rik	4.99379	ENSMUSG00000096727	Psmb9	2.98131	ENSMUSG00000111410	RP23-276M23.6	3.01092	ENSMUSG00000041881	Ndufa7	2.62921				ENSMUSG00000087500	Gm12426	4.45333
ENSMUSG00000106990	Gm42547	3.14035	ENSMUSG00000096979	Gm26880	2.67227	ENSMUSG00000111602	RP24-250L13.2	13.96	ENSMUSG00000041889	Shisa4	3.99219				ENSMUSG00000087545	Gm13966	3.72289
ENSMUSG00000107012	4930528J11Rik	14.1944	ENSMUSG00000097159	Gm26517	2.32418	ENSMUSG00000111820	RP23-101D11.3	51.6667	ENSMUSG00000041891	Lman1	2.56934				ENSMUSG00000087607	Gm16034	3.95604
ENSMUSG00000107040	Gm43791	3.01389	ENSMUSG00000097315	Gm26568	2.70813	ENSMUSG00000111856	RP23-187B11.7	16.8263	ENSMUSG00000041895	Wipi1	2.93804				ENSMUSG00000087679	C330006A16Rik	2.22892
ENSMUSG00000107134	Gm42528	46.9365	ENSMUSG00000097445	Gm26631	3.20675				ENSMUSG00000041920	Slc16a6	10.7802				ENSMUSG00000087698	Gm13031	33.1538
ENSMUSG00000107317	Gm19719	3.02	ENSMUSG00000097454	Gm26892	64.5323				ENSMUSG00000041936	Agrn	2.03168				ENSMUSG00000089635	Gm16559	19.0532
ENSMUSG00000107470	Gm3375	9.25	ENSMUSG00000097471	5830432E09Rik	5.27368				ENSMUSG00000041958	Pigs	2.72135				ENSMUSG00000089675	Ugt1a8	2.50126
ENSMUSG00000107728	Gm43949	4.52273	ENSMUSG00000097493	9930014A18Rik	2.04816				ENSMUSG00000041959	S100a10	3.83994				ENSMUSG00000089715	Cbx6	2.41952
ENSMUSG00000107842	Gm44089	192.768	ENSMUSG00000097680	Gm26642	2.87891				ENSMUSG00000042190	Cmklr1	10.4056				ENSMUSG00000089832	Shkbp1	7.01852
ENSMUSG00000107869	Gm29848	2.57317	ENSMUSG00000097724	Gm26850	2.70455				ENSMUSG00000042225	Ammecr1	5.40029				ENSMUSG00000089943	Ugt1a5	2.43896
ENSMUSG00000108084	Gm7932	16.6	ENSMUSG00000097749	Gm16938	5.175				ENSMUSG00000042229	Rabif	2.44242				ENSMUSG00000089945	Pakap	2.1246
ENSMUSG00000108291	Gm44292	2.72961	ENSMUSG00000097750	Gm4673	2.1725				ENSMUSG00000042312	S100a13	2.36735				ENSMUSG00000089960	Ugt1a1	2.43936
ENSMUSG00000108596	Itgam	155.433	ENSMUSG00000097817	Gm26810	2.23926				ENSMUSG00000042331	Specc1	15.6587				ENSMUSG00000090069	E430024P14Rik	4.11146
ENSMUSG00000108793	Gm45213	2.9913	ENSMUSG00000097854	Gm26602	2.58155				ENSMUSG00000042340	Ctf1	6.74468				ENSMUSG00000090124	Ugt1a7c	2.48403
ENSMUSG00000109244	Gm44751	3.81053	ENSMUSG00000097860	Gm26857	3.62087				ENSMUSG00000042349	Ikbke	4.27919				ENSMUSG00000090145	Ugt1a6b	2.32198
ENSMUSG00000109251	E230032D23Rik	4.91489	ENSMUSG00000097906	Gm9625	3.40341				ENSMUSG00000042357	Gjb5	71650				ENSMUSG00000090165	Ugt1a10	2.46985
ENSMUSG00000109695	Gm31166	3.73228	ENSMUSG00000097923	Gm26577	8.12281				ENSMUSG00000042363	Lgalsl	2.29463				ENSMUSG00000090171	Ugt1a2	2.44444
ENSMUSG00000109735	Gm45667	25.4545	ENSMUSG00000098465	Mir1668	5.51389				ENSMUSG00000042377	Fam83g	2.3162				ENSMUSG00000090175	Ugt1a9	2.45387
ENSMUSG00000109881	Gm45507	3.05804	ENSMUSG00000098489	Mir7678	5.5				ENSMUSG00000042401	Crtac1	17.6471				ENSMUSG00000090231	Cfb	3.07487
ENSMUSG00000109901	Chmp1b	2.45873	ENSMUSG00000098597	Mir6418	3.24044				ENSMUSG00000042569	Dhrs7b	2.61212				ENSMUSG00000090272	Mndal	3.04903
ENSMUSG00000109973	Gm45397	23.75	ENSMUSG00000098826	Mir7677	2.86239				ENSMUSG00000042607	Asb4	2.76845				ENSMUSG00000090291	Lrrc10b	14.7
ENSMUSG00000110148	RP23-106I21.5	4.34066	ENSMUSG00000099066	Mir6978	24950				ENSMUSG00000042644	Itpr3	11.813				ENSMUSG00000090293	Gm17034	2.31873
ENSMUSG00000110386	Gm42031	10.3448	ENSMUSG00000099519	Gm29253	2.43056				ENSMUSG00000042709	Atpaf2	2.02155				ENSMUSG00000090307	1700071M16Rik	4.96045
ENSMUSG00000110520	RP24-420C18.1	44.5	ENSMUSG00000099590	C330022C24Rik	4.42703				ENSMUSG00000042724	Map3k9	10.4286				ENSMUSG00000090357	Gm17077	2.20144
ENSMUSG00000110899	RP23-284E19.10	2.16544	ENSMUSG00000100627	A830008E24Rik	12.0588				ENSMUSG00000042734	Ttc9	8.45				ENSMUSG00000090622	A930033H14Rik	2.47727
ENSMUSG00000111329	RP23-228B2.3	2.12955	ENSMUSG00000101304	Plet1os	6.49368				ENSMUSG00000042737	Dpm3	2.39103				ENSMUSG00000090639	Gm20425	7.79819
ENSMUSG00000111394	RP23-320D23.6	2.06745	ENSMUSG00000101406	Gm29200	13.8726				ENSMUSG00000042751	Nmnat2	8.7377				ENSMUSG00000090758	Gm17178	3.03846
ENSMUSG00000111410	RP23-276M23.6	2.64847	ENSMUSG00000101628	Gm28177	2.57779				ENSMUSG00000042761	Mrap2	4.27536				ENSMUSG00000090958	Lrrc32	3.0349
ENSMUSG00000111424	RP23-187B11.10	4.75439	ENSMUSG00000102027	Gm28914	2.42105				ENSMUSG00000042793	Lgr6	57.2405				ENSMUSG00000091423	Gm17509	15.3333
ENSMUSG00000111856	RP23-187B11.7	20.3249	ENSMUSG00000102299	Gm37539	10.3053				ENSMUSG00000042804	Gpr153	2.24812				ENSMUSG00000091471	Gm20538	2.40714
			ENSMUSG00000102336	Gm37233	3.66906				ENSMUSG00000042842	Serpinb6b	49.7831				ENSMUSG00000092071	A230065N10Rik	13.25
			ENSMUSG00000102433	Gm38050	15.4478				ENSMUSG00000042942	Greb1l	2.69945				ENSMUSG00000092220	Gm20528	2.20991
			ENSMUSG00000102644	Thap6	2.3794				ENSMUSG00000042985	Upk3b	80.4301				ENSMUSG00000092360	Gm20441	2.30769
			ENSMUSG00000102690	Gm37779	17.7143				ENSMUSG00000043061	Tmem18	2.39467				ENSMUSG00000092405	Gm20402	2.54217
			ENSMUSG00000103067	Gm30414	2.75664				ENSMUSG00000043088	Il17re	41.1481				ENSMUSG00000092486	2610524H06Rik	7.7027
			ENSMUSG00000103440	Gm37131	3.20482				ENSMUSG00000043110	Lrrn4	70.32				ENSMUSG00000092511	Gm20547	3.47845
			ENSMUSG00000103948	4930594C11Rik	4.92				ENSMUSG00000043162	Pyurf	2.1375				ENSMUSG00000093315	Mir5114	3.63559
			ENSMUSG00000104044	Gm37566	2.26531				ENSMUSG00000043501	Lgals2	6.80723				ENSMUSG00000094526	Gm21451	5.70732
			ENSMUSG00000104173	Gm37703	5.06977				ENSMUSG00000043510	Hscb	2.47368				ENSMUSG00000094814	Gm21973	109.726
			ENSMUSG00000104350	Gm38244	14.6667				ENSMUSG00000043635	Adamts3	11.4562				ENSMUSG00000094910	D430019H16Rik	3.82021
			ENSMUSG00000104713	Gbp6	2.13333				ENSMUSG00000043664	Tmem221	4.66667				ENSMUSG00000095041	AC149090.1	2.9957
			ENSMUSG00000104937	Gm43057	66.4671				ENSMUSG00000043822	Adamtsl5	3.68041				ENSMUSG00000095115	Itpripl2	2.11908
			ENSMUSG00000105053	Gm43064	2.64502				ENSMUSG00000043903	Gm22	6.26891				ENSMUSG00000095464	Gm21987	2.40408
			ENSMUSG00000105107	Gm43412	3.32558				ENSMUSG00000043964	Orai3	2				ENSMUSG00000095538	Gm21983	2.38393
			ENSMUSG00000105211	AC125167.1	3.85612				ENSMUSG00000044017	Adgrd1	5.50868				ENSMUSG00000096210	H1f0	2.42756
			ENSMUSG00000105415	Gm44364	2.56106				ENSMUSG00000044042	Fmn1	4.3666				ENSMUSG00000096606	Tpbgl	9.18333
			ENSMUSG00000105703	Gm43305	7.57407				ENSMUSG00000044080	S100a1	9.89394				ENSMUSG00000096687	Mfsd4b4	2.19444
			ENSMUSG00000105826	Gm43819	3.19512				ENSMUSG00000044167	Foxo1	2.99013				ENSMUSG00000096956	Snhg18	3.0469
			ENSMUSG00000105900	Gm43240	3.87879				ENSMUSG00000044217	Aqp5	29.0909				ENSMUSG00000097002	Gm2670	4.97101
			ENSMUSG00000105954	Gm42793	29.4902				ENSMUSG00000044229	Nxpe4	2.64706				ENSMUSG00000097222	1010001N08Rik	12.0417
			ENSMUSG00000106082	4930404A12Rik	4.59006				ENSMUSG00000044244	Il20rb	5.30909				ENSMUSG00000097252	Gm6634	52.9091
			ENSMUSG00000106214	Gm43426	3.83607				ENSMUSG00000044258	Ctla2a	6.35667				ENSMUSG00000097325	Gm16897	6.08603
			ENSMUSG00000106734	Gm20559	2.21267				ENSMUSG00000044393	Dsg2	17.0141				ENSMUSG00000097656	Gm26712	2.88889
			ENSMUSG00000107012	4930528J11Rik	14.3333				ENSMUSG00000044408	Sptssa	2.01286				ENSMUSG00000097745	AI115009	109.453
			ENSMUSG00000107134	Gm42528	45.9206				ENSMUSG00000044442	N6amt1	2.04276				ENSMUSG00000097815	Gm26809	3.99736
			ENSMUSG00000107222	Gm43198	2.89041				ENSMUSG00000044456	Rin3	17.5287				ENSMUSG00000097817	Gm26810	3.30435
			ENSMUSG00000107317	Gm19719	4.86				ENSMUSG00000044627	Swi5	2.0878				ENSMUSG00000097928	Gm26578	3.41373
			ENSMUSG00000107470	Gm3375	11.0625				ENSMUSG00000044641	Pard6b	9.08284				ENSMUSG00000097960	A330074K22Rik	5.26531
			ENSMUSG00000107659	Gm44170	2.15548				ENSMUSG00000044646	Zbtb7c	5.1954				ENSMUSG00000097988	Gm10535	520.896
			ENSMUSG00000107728	Gm43949	4.55682				ENSMUSG00000044715	Gskip	2.23158				ENSMUSG00000097993	Ptprv	243.296
			ENSMUSG00000107842	Gm44089	200.748				ENSMUSG00000044734	Serpinb1a	4.33382				ENSMUSG00000098332	2310009A05Rik	2.57732
			ENSMUSG00000107869	Gm29848	2.63415				ENSMUSG00000044986	Tst	3.26087				ENSMUSG00000098465	Mir1668	5.80488
			ENSMUSG00000108084	Gm7932	14.88				ENSMUSG00000045092	S1pr1	3.18067				ENSMUSG00000098666	Mir6950	13.8125
			ENSMUSG00000108126	Gm43909	3.63077				ENSMUSG00000045136	Tubb2b	2.01078				ENSMUSG00000100053	Gm28154	6.31481
			ENSMUSG00000108291	Gm44292	2.22747				ENSMUSG00000045237	1110012L19Rik	3.24176				ENSMUSG00000100113	Gm28592	2.37806
			ENSMUSG00000108596	Itgam	139.5				ENSMUSG00000045287	Rtn4rl1	3.86179				ENSMUSG00000100143	C030027H14Rik	6.9
			ENSMUSG00000108793	Gm45213	2.46087				ENSMUSG00000045312	Lhfpl2	4.84397				ENSMUSG00000100393	Gm29491	3.04264
			ENSMUSG00000109244	Gm44751	3.57895				ENSMUSG00000045538	Ddx28	2.45652				ENSMUSG00000101304	Plet1os	6.2193
			ENSMUSG00000109408	Gm44935	2.94259				ENSMUSG00000045545	Krt14	3.22973				ENSMUSG00000101693	Gm19461	34.1429
			ENSMUSG00000109695	Gm31166	3.40551				ENSMUSG00000045594	Glb1	2.9971				ENSMUSG00000102191	Gm36569	17.7125
			ENSMUSG00000109973	Gm45397	17.9545				ENSMUSG00000045629	Sh3tc2	61.9615				ENSMUSG00000102299	Gm37539	3.90955
			ENSMUSG00000110040	RP23-145I16.3	2.15705				ENSMUSG00000045667	Smtnl2	3.28378				ENSMUSG00000102312	Pcdha3	3.15607
			ENSMUSG00000110148	RP23-106I21.5	4.62637				ENSMUSG00000045725	Prr15	79.75				ENSMUSG00000103092	Pcdha5	3.02899
			ENSMUSG00000110520	RP24-420C18.1	31.5714				ENSMUSG00000045776	Lrtm1	6.71875				ENSMUSG00000103255	Pcdhac1	3.06322
			ENSMUSG00000111394	RP23-320D23.6	2.71766				ENSMUSG00000045790	Ccdc149	6.68605				ENSMUSG00000103434	Gm36993	19.297
			ENSMUSG00000111796	RP24-294A16.4	7.09137				ENSMUSG00000045827	Serpinb9	3.91954				ENSMUSG00000103442	Pcdha1	3.31481
			ENSMUSG00000111856	RP23-187B11.7	21.1995				ENSMUSG00000045854	Lyrm2	5.56579				ENSMUSG00000103622	Gm38391	3.84722
									ENSMUSG00000045867	Cradd	4.38889				ENSMUSG00000103707	Pcdha6	2.97802
									ENSMUSG00000045930	Clec14a	4.18581				ENSMUSG00000103770	Pcdha9	3.29947
									ENSMUSG00000045980	Tmem104	2.38243				ENSMUSG00000103800	Pcdha8	3.17241
									ENSMUSG00000046027	Stard5	3.6835				ENSMUSG00000104148	Pcdha2	3.02717
									ENSMUSG00000046056	Sbsn	2.67708				ENSMUSG00000104252	Pcdha4	3.28261
									ENSMUSG00000046079	Lrrc8d	2.61594				ENSMUSG00000104318	Pcdha7	2.92391
									ENSMUSG00000046157	Tmem229b	4.14474				ENSMUSG00000104347	Gm37689	2.8022
									ENSMUSG00000046178	Nxph1	54.2857				ENSMUSG00000104653	Gm43109	34.5897
									ENSMUSG00000046186	Cd109	2.51654				ENSMUSG00000104723	Gm43106	2.35625
									ENSMUSG00000046223	Plaur	2.70216				ENSMUSG00000105211	AC125167.1	7.47175
									ENSMUSG00000046229	Scand1	2.11824				ENSMUSG00000105366	Gm43719	2.0355
									ENSMUSG00000046318	Ccbe1	12.7409				ENSMUSG00000105415	Gm44364	5.19355
									ENSMUSG00000046352	Gjb2	21.4386				ENSMUSG00000105518	Gm42674	35.75
									ENSMUSG00000046402	Rbp1	8.69097				ENSMUSG00000105604	Gm42838	2.90361
									ENSMUSG00000046449	C77370	33.1786				ENSMUSG00000105617	Gm43809	2.58964
									ENSMUSG00000046491	C1qtnf2	2.97674				ENSMUSG00000105975	Gm42609	5.30612
									ENSMUSG00000046516	Cox17	3.82746				ENSMUSG00000106247	Gm43720	3.48582
									ENSMUSG00000046598	Bdh1	2.6875				ENSMUSG00000106344	Mir1892	2.47647
									ENSMUSG00000046623	Gjb4	31000				ENSMUSG00000106379	Lhfpl3	19.0526
									ENSMUSG00000046699	Slitrk4	10.4737				ENSMUSG00000106407	Gm43439	3.97213
									ENSMUSG00000046718	Bst2	10.5069				ENSMUSG00000106468	AC122844.1	6.13725
									ENSMUSG00000046719	Nxph3	2.95041				ENSMUSG00000106702	Gm42846	2.32936
									ENSMUSG00000046761	Fam83h	2.74554				ENSMUSG00000106874	Gm20186	3.77073
									ENSMUSG00000046808	Atp10d	3.62105				ENSMUSG00000106894	Gm17130	2.4359
									ENSMUSG00000046818	Ddit4l	3.03235				ENSMUSG00000106918	Mrpl33	2.31034
									ENSMUSG00000046856	Gpr1	4.65455				ENSMUSG00000107090	Gm42884	2.57692
									ENSMUSG00000046949	Nqo2	2.51743				ENSMUSG00000107318	Gm43278	8.975
									ENSMUSG00000047250	Ptgs1	15.6832				ENSMUSG00000107384	Gm42557	17.125
									ENSMUSG00000047414	Flrt2	8.35385				ENSMUSG00000107881	Gm44250	3.35542
									ENSMUSG00000047415	Gpr68	16.6552				ENSMUSG00000107961	Gm44036	2.00917
									ENSMUSG00000047420	Fam180a	3.44835				ENSMUSG00000107969	Gm44085	3.34354
									ENSMUSG00000047557	Lxn	4.68548				ENSMUSG00000107997	Gm44243	2.5
									ENSMUSG00000047730	Fcgbp	14.3766				ENSMUSG00000108402	9430064I24Rik	2.98319
									ENSMUSG00000047787	Flrt1	3.97687				ENSMUSG00000108511	Gm44987	3.46914
									ENSMUSG00000047878	A4galt	2.07143				ENSMUSG00000108524	Gm44876	2.82709
									ENSMUSG00000047963	Stbd1	3.08696				ENSMUSG00000108596	Itgam	12.1
									ENSMUSG00000048078	Tenm4	11.0379				ENSMUSG00000109111	6530437J22Rik	2.63006
									ENSMUSG00000048087	Gm4737	7.93704				ENSMUSG00000109735	Gm45667	2.99471
									ENSMUSG00000048126	Col6a3	9.81029				ENSMUSG00000109812	Gm45640	3.02299
									ENSMUSG00000048218	Amigo2	3.41258				ENSMUSG00000109947	Gm45669	2.30811
									ENSMUSG00000048277	Syngr2	2.07332				ENSMUSG00000109967	RP23-220F20.4	2.39083
									ENSMUSG00000048307	Ankrd46	2.95329				ENSMUSG00000110040	RP23-145I16.3	2.2513
									ENSMUSG00000048337	Npy4r	66800				ENSMUSG00000111602	RP24-250L13.2	3.11268
									ENSMUSG00000048368	Omd	8.11957				ENSMUSG00000111796	RP24-294A16.4	30.7175
									ENSMUSG00000048450	Msx1	2.44872
									ENSMUSG00000048485	Zbtb8b	184.882
									ENSMUSG00000048486	Fitm2	2.33333
									ENSMUSG00000048578	Mlec	2.75329
									ENSMUSG00000048612	Myof	3.50468
									ENSMUSG00000048834	Vstm2a	4.75641
									ENSMUSG00000048915	Efna5	2.6598
									ENSMUSG00000049097	Ankrd34a	3.04938
									ENSMUSG00000049112	Oxtr	52.1517
									ENSMUSG00000049299	Trappc1	3.82857
									ENSMUSG00000049327	Kmt5a	3.00272
									ENSMUSG00000049382	Krt8	11.3658
									ENSMUSG00000049420	Tmem200a	4.6466
									ENSMUSG00000049436	Upk1b	32.2258
									ENSMUSG00000049526	Tmem202	2.10714
									ENSMUSG00000049556	Lingo1	2.49367
									ENSMUSG00000049686	Orai1	2.2638
									ENSMUSG00000049717	Lig4	2.77381
									ENSMUSG00000049760	2410015M20Rik	2.96447
									ENSMUSG00000049791	Fzd4	2.91498
									ENSMUSG00000049922	Slc35c1	3.35294
									ENSMUSG00000049960	Mrps16	3.26786
									ENSMUSG00000049985	Ankrd55	13.5625
									ENSMUSG00000050014	Apol10b	3.15957
									ENSMUSG00000050069	Grem2	3.766
									ENSMUSG00000050108	Bpifc	981.592
									ENSMUSG00000050174	Nudt6	3.02481
									ENSMUSG00000050271	D8Ertd82e	7.73224
									ENSMUSG00000050272	Dscam	43.9487
									ENSMUSG00000050335	Lgals3	13.7421
									ENSMUSG00000050359	Sprr1a	16.4087
									ENSMUSG00000050377	Il31ra	28.2727
									ENSMUSG00000050390	C77080	2.83355
									ENSMUSG00000050410	Tcf19	5.34043
									ENSMUSG00000050550	Gm11868	2.18045
									ENSMUSG00000050552	Lamtor4	4.81176
									ENSMUSG00000050558	Prokr2	677.307
									ENSMUSG00000050608	Minos1	2.61774
									ENSMUSG00000050627	Gpd1l	2.36692
									ENSMUSG00000050635	Sprr2f	25.8889
									ENSMUSG00000050732	Vamp8	8.74074
									ENSMUSG00000050751	Pgbd5	6.87917
									ENSMUSG00000050856	Atp5k	3.67532
									ENSMUSG00000050908	Tvp23a	2.24286
									ENSMUSG00000050931	Sgms2	3.86712
									ENSMUSG00000050953	Gja1	4.79591
									ENSMUSG00000051000	Fam160a1	7.30319
									ENSMUSG00000051007	Pddc1	2.24364
									ENSMUSG00000051022	Hs3st1	6.25373
									ENSMUSG00000051048	P4ha3	39.4742
									ENSMUSG00000051062	Fbll1	57.8889
									ENSMUSG00000051065	Mb21d2	3.90503
									ENSMUSG00000051076	Vtcn1	15.1729
									ENSMUSG00000051154	Commd3	3.23872
									ENSMUSG00000051256	Jagn1	2.49309
									ENSMUSG00000051279	Gdf6	6.49123
									ENSMUSG00000051319	1500011K16Rik	4.01136
									ENSMUSG00000051341	Zfp52	2.73618
									ENSMUSG00000051359	Ncald	6.75862
									ENSMUSG00000051367	Six1	36.3333
									ENSMUSG00000051439	Cd14	3.19365
									ENSMUSG00000051550	Zfp579	2.85965
									ENSMUSG00000051910	Sox6	9.7356
									ENSMUSG00000051950	B3glct	3.07619
									ENSMUSG00000051951	Xkr4	7.5625
									ENSMUSG00000052031	Tagap1	2.65124
									ENSMUSG00000052033	Pfdn4	2.11141
									ENSMUSG00000052105	Mtcl1	2.22867
									ENSMUSG00000052117	D630039A03Rik	16.1009
									ENSMUSG00000052135	Foxo6	2.45669
									ENSMUSG00000052139	Bre	2.23065
									ENSMUSG00000052151	Plpp2	3.34058
									ENSMUSG00000052316	Lrrc15	2.42667
									ENSMUSG00000052397	Ezr	5.04098
									ENSMUSG00000052428	Tmco1	2.49178
									ENSMUSG00000052459	Atp6v1a	2.28905
									ENSMUSG00000052593	Adam17	2.50375
									ENSMUSG00000052738	Suclg1	3.47093
									ENSMUSG00000052776	Oas1a	39.4444
									ENSMUSG00000052848	C130026L21Rik	115.92
									ENSMUSG00000052852	Reep1	2.18471
									ENSMUSG00000052854	Nrk	19.7596
									ENSMUSG00000052957	Gas1	3.15066
									ENSMUSG00000053012	Krcc1	2.45411
									ENSMUSG00000053024	Cntn2	554.167
									ENSMUSG00000053137	Mapk11	8.14286
									ENSMUSG00000053279	Aldh1a1	13.8157
									ENSMUSG00000053291	Rab4b	2.32123
									ENSMUSG00000053310	Nrgn	9.54545
									ENSMUSG00000053317	Sec61b	5.81068
									ENSMUSG00000053368	Rxfp2	12.8283
									ENSMUSG00000053414	Hunk	8.21495
									ENSMUSG00000053522	Lgals7	72.2857
									ENSMUSG00000053615	Gm9913	2.1831
									ENSMUSG00000053706	B430305J03Rik	2.72944
									ENSMUSG00000053886	Sh2d4a	4.61538
									ENSMUSG00000053897	Slc39a8	2.77763
									ENSMUSG00000054057	A930004D18Rik	2.89535
									ENSMUSG00000054162	Spock3	21.16
									ENSMUSG00000054203	Ifi205	8.91379
									ENSMUSG00000054312	Mrps21	4.29348
									ENSMUSG00000054428	Atpif1	2.53838
									ENSMUSG00000054555	Adam12	3.46306
									ENSMUSG00000054619	Mettl7a1	4.14237
									ENSMUSG00000054675	Tmem119	3.9297
									ENSMUSG00000054702	Ap1s3	5.41026
									ENSMUSG00000054720	Lrrc8c	3.02778
									ENSMUSG00000054793	Cadm4	8.81513
									ENSMUSG00000054814	Usp46	2.69731
									ENSMUSG00000054976	Nyap2	23100
									ENSMUSG00000055022	Cntn1	3.51567
									ENSMUSG00000055044	Pdlim1	2.42295
									ENSMUSG00000055301	Adh7	15.0222
									ENSMUSG00000055489	Ano5	389.389
									ENSMUSG00000055652	Klhl25	2.6859
									ENSMUSG00000055681	Cope	2.35235
									ENSMUSG00000055723	Rras2	4.18459
									ENSMUSG00000055912	Tmem150a	3.22366
									ENSMUSG00000056091	St3gal5	8.91066
									ENSMUSG00000056121	Fez2	2.99837
									ENSMUSG00000056174	Col8a2	20.813
									ENSMUSG00000056220	Pla2g4a	3.78003
									ENSMUSG00000056486	Chn1	3.89873
									ENSMUSG00000056492	Adgrf5	6.05186
									ENSMUSG00000056498	Tmem154	7.97436
									ENSMUSG00000056515	Rab31	4.43536
									ENSMUSG00000056553	Ptprn2	86.75
									ENSMUSG00000056612	Ppp1r14b	4.76023
									ENSMUSG00000056900	Usp13	2.12688
									ENSMUSG00000057092	Fxyd3	3.59633
									ENSMUSG00000057193	Slc44a2	2.53325
									ENSMUSG00000057280	Musk	13.95
									ENSMUSG00000057346	Apol9a	68.8571
									ENSMUSG00000057375	Yipf1	2.5599
									ENSMUSG00000057388	Mrpl18	3.19922
									ENSMUSG00000057411	Fam173a	2.78601
									ENSMUSG00000057604	Lmcd1	10.5667
									ENSMUSG00000057751	Megf6	14.8279
									ENSMUSG00000057766	Ankrd29	3.23704
									ENSMUSG00000057789	Bak1	3.83258
									ENSMUSG00000057969	Sema3b	5.28528
									ENSMUSG00000057982	Zfp809	2.79876
									ENSMUSG00000058076	Sdhc	2.52129
									ENSMUSG00000058420	Syt17	20.2105
									ENSMUSG00000058427	Cxcl2	9.45208
									ENSMUSG00000058446	Znrf2	2.64106
									ENSMUSG00000058624	Gda	7.13312
									ENSMUSG00000058833	2810428I15Rik	2.33443
									ENSMUSG00000059022	Kcp	4.83505
									ENSMUSG00000059040	Eno1b	3.05263
									ENSMUSG00000059146	Ntrk3	4.1325
									ENSMUSG00000059278	Naa38	2.42793
									ENSMUSG00000059316	Slc27a4	2.26042
									ENSMUSG00000059456	Ptk2b	9.82759
									ENSMUSG00000059518	Znhit1	2.66772
									ENSMUSG00000059534	Uqcr10	6.41949
									ENSMUSG00000059734	Ndufs8	2.90939
									ENSMUSG00000059810	Rgs3	2.23553
									ENSMUSG00000059901	Adamts14	11.6543
									ENSMUSG00000059908	Mug1	86700
									ENSMUSG00000060032	H2afj	3.56048
									ENSMUSG00000060212	Pcnx2	79.0769
									ENSMUSG00000060224	Pyroxd2	3.39333
									ENSMUSG00000060402	Chst8	2.38
									ENSMUSG00000060459	Kng2	39.2105
									ENSMUSG00000060487	Samd5	4.30108
									ENSMUSG00000060538	Tmem219	2.43386
									ENSMUSG00000060568	Fam78b	7.59459
									ENSMUSG00000060572	Mfap2	5.11055
									ENSMUSG00000060988	Galnt13	46.6667
									ENSMUSG00000061046	Haghl	3.07843
									ENSMUSG00000061048	Cdh3	8.72459
									ENSMUSG00000061086	Myl4	4.21324
									ENSMUSG00000061111	Fam195b	2.80782
									ENSMUSG00000061126	Cyp4f39	31.1176
									ENSMUSG00000061411	Nol4l	2.31741
									ENSMUSG00000061451	Tmem151a	17.7582
									ENSMUSG00000061461	Smim20	3.54545
									ENSMUSG00000061518	Cox5b	2.10078
									ENSMUSG00000061576	Dpp6	3.57078
									ENSMUSG00000061601	Pclo	15.7111
									ENSMUSG00000061838	Suclg2	2.36244
									ENSMUSG00000062054	Iah1	2.36503
									ENSMUSG00000062098	Btbd3	10.2007
									ENSMUSG00000062257	Opcml	10.9426
									ENSMUSG00000062300	Nectin2	2.26047
									ENSMUSG00000062309	Rpp25	27.25
									ENSMUSG00000062345	Serpinb2	303.98
									ENSMUSG00000062593	Lilrb4a	56
									ENSMUSG00000062683	Atp5g2	2.10982
									ENSMUSG00000062933	Gm10123	2.04861
									ENSMUSG00000062937	Mtap	2.63711
									ENSMUSG00000062960	Kdr	3.20336
									ENSMUSG00000062963	Ufc1	3.17974
									ENSMUSG00000062981	Mrpl42	3.28135
									ENSMUSG00000063011	Msln	288.892
									ENSMUSG00000063430	Wscd2	4.88251
									ENSMUSG00000063524	Eno1	3.16082
									ENSMUSG00000063531	Sema3e	17.8214
									ENSMUSG00000063687	Pcdhb5	3.32353
									ENSMUSG00000063838	1700027J19Rik	2.125
									ENSMUSG00000063856	Gpx1	3.87265
									ENSMUSG00000063903	Klk1	201.75
									ENSMUSG00000063904	Dpp3	4.32899
									ENSMUSG00000064080	Fbln2	19.8264
									ENSMUSG00000064115	Cadm2	11.8214
									ENSMUSG00000064193	Gm4735	3.54808
									ENSMUSG00000064210	Ano6	2.59826
									ENSMUSG00000064215	Ifi27	2.25452
									ENSMUSG00000064330	Pde6h	28.8889
									ENSMUSG00000064337	mt-Rnr1	2.39701
									ENSMUSG00000064372	mt-Tp	4.91603
									ENSMUSG00000064797	Gm24357	5.71689
									ENSMUSG00000065265	Gm23455	4.15865
									ENSMUSG00000065529	Mir22	3.05263
									ENSMUSG00000066152	Slc31a2	3.16431
									ENSMUSG00000066456	Hmgn3	6.57627
									ENSMUSG00000066829	Zfp810	4.45333
									ENSMUSG00000067071	Hes6	4.22892
									ENSMUSG00000067158	Col4a4	2.77926
									ENSMUSG00000067780	Pi15	7.77091
									ENSMUSG00000067825	Pex26	3.73684
									ENSMUSG00000068122	Agtr2	97.9032
									ENSMUSG00000068246	Apol9b	9.44444
									ENSMUSG00000068329	Htra2	2.12514
									ENSMUSG00000068335	Dok1	4.67925
									ENSMUSG00000068617	Efcab1	97.8571
									ENSMUSG00000068749	Psma5	2.90072
									ENSMUSG00000068758	Il3ra	3.78947
									ENSMUSG00000068876	Cgn	9.57463
									ENSMUSG00000069267	Hist1h3b	4.48936
									ENSMUSG00000069310	Hist1h3c	8.96667
									ENSMUSG00000069670	Nkain2	27.7778
									ENSMUSG00000069744	Psmb3	2.31703
									ENSMUSG00000069763	Tmem100	3.46617
									ENSMUSG00000069920	B3gnt9	3.62213
									ENSMUSG00000070000	Fcho1	75.8571
									ENSMUSG00000070031	Sp140	2.31677
									ENSMUSG00000070034	Sp110	6.01515
									ENSMUSG00000070423	Olfr558	4.01031
									ENSMUSG00000070436	Serpinh1	3.50676
									ENSMUSG00000070462	Mesdc1	3.98677
									ENSMUSG00000070576	Mn1	2.56103
									ENSMUSG00000070605	Zfp992	2.13245
									ENSMUSG00000070780	Rbm47	13.64
									ENSMUSG00000070866	Zfp804a	2.35514
									ENSMUSG00000070867	Trabd2b	6.11146
									ENSMUSG00000071014	Ndufb6	2.836
									ENSMUSG00000071042	Rasgrp3	19.0968
									ENSMUSG00000071265	1700086L19Rik	6.14583
									ENSMUSG00000071369	Map3k5	3.84485
									ENSMUSG00000071528	Usmg5	2.86898
									ENSMUSG00000071547	Nt5dc2	2.18325
									ENSMUSG00000071604	Fam189a2	2.69592
									ENSMUSG00000071653	1810009A15Rik	2.37
									ENSMUSG00000071654	Uqcc3	3.28767
									ENSMUSG00000071656	Lrrn4cl	2.43485
									ENSMUSG00000071713	Csf2rb	4.80303
									ENSMUSG00000072720	Myo18b	119.116
									ENSMUSG00000072849	Serpina1e	39
									ENSMUSG00000072941	Sod3	3.65748
									ENSMUSG00000073002	Vamp5	3.02941
									ENSMUSG00000073016	Uprt	2.51579
									ENSMUSG00000073067	9130019P16Rik	10.5116
									ENSMUSG00000073418	C4b	8.0991
									ENSMUSG00000073616	Myeov2	3.97251
									ENSMUSG00000073643	Wdfy1	2.85394
									ENSMUSG00000073652	Apol7d	2.97795
									ENSMUSG00000073679	Mxra8os	2.27088
									ENSMUSG00000073802	Cdkn2b	3.45
									ENSMUSG00000073910	Mob3b	2.34182
									ENSMUSG00000074182	Znhit6	2.6191
									ENSMUSG00000074194	Zfp791	3.80247
									ENSMUSG00000074207	Adh1	13.1707
									ENSMUSG00000074345	Tnfaip8l3	20.3846
									ENSMUSG00000074364	Ehd2	2.95621
									ENSMUSG00000074457	S100a16	3.32115
									ENSMUSG00000074579	Lekr1	2.42857
									ENSMUSG00000074649	BC029722	2.01759
									ENSMUSG00000074813	Gm14005	21.6364
									ENSMUSG00000074874	Ctla2b	5.62903
									ENSMUSG00000074923	Pak6	16.3
									ENSMUSG00000074971	Fibin	17.6741
									ENSMUSG00000075593	Gal3st4	3.27885
									ENSMUSG00000075602	Ly6a	6.60081
									ENSMUSG00000077391	Gm24336	2.68
									ENSMUSG00000078348	Sf3b5	2.28337
									ENSMUSG00000078453	Abracl	2.35749
									ENSMUSG00000078502	Gm13212	2.41264
									ENSMUSG00000078570	1110065P20Rik	2.65455
									ENSMUSG00000078656	Vps25	2.53499
									ENSMUSG00000078713	Tomm5	3.40556
									ENSMUSG00000079017	Ifi27l2a	17.0781
									ENSMUSG00000079018	Ly6c1	7.55435
									ENSMUSG00000079037	Prnp	2.09075
									ENSMUSG00000079138	Gm8818	8.18182
									ENSMUSG00000079164	Tlr5	7.18919
									ENSMUSG00000079197	Psme2	2.3012
									ENSMUSG00000079293	Clec7a	87.6667
									ENSMUSG00000079334	Nat6	2.55837
									ENSMUSG00000079355	Ackr4	2.2973
									ENSMUSG00000079445	B3gnt7	21.7059
									ENSMUSG00000079484	Phyhd1	2.57632
									ENSMUSG00000079499	6530402F18Rik	2.23425
									ENSMUSG00000079620	Muc4	30.6852
									ENSMUSG00000079685	Ulbp1	37.5556
									ENSMUSG00000079834	Tmlhe	2.11084
									ENSMUSG00000080374	Gm22953	2.53495
									ENSMUSG00000081223	Gm12247	4.875
									ENSMUSG00000081355	Gm15264	2.68182
									ENSMUSG00000081534	Slc48a1	3.59778
									ENSMUSG00000082361	Btc	20.95
									ENSMUSG00000084523	Mir1903	6.14557
									ENSMUSG00000084783	Gm15419	5.01705
									ENSMUSG00000084817	Gm5526	2.24476
									ENSMUSG00000084970	1700060J05Rik	2.95327
									ENSMUSG00000085055	Gm15958	15.2941
									ENSMUSG00000085080	2310044K18Rik	3.02151
									ENSMUSG00000085227	6330418K02Rik	2.8481
									ENSMUSG00000085314	Gm14866	46.3074
									ENSMUSG00000085495	Gm16796	2.33
									ENSMUSG00000085526	Gm16083	2.85593
									ENSMUSG00000085560	C230038L03Rik	11.6228
									ENSMUSG00000085766	2810430I11Rik	4.00595
									ENSMUSG00000085918	Gm13032	16.1364
									ENSMUSG00000086006	Gm13293	52.495
									ENSMUSG00000086040	Wipf3	14.2429
									ENSMUSG00000086083	Gm15829	2.832
									ENSMUSG00000086373	Gm11978	3.87324
									ENSMUSG00000086472	Gm16172	2.82609
									ENSMUSG00000086514	Gm11747	3.06329
									ENSMUSG00000086560	Gm13372	5.35172
									ENSMUSG00000086582	Gm16272	2.33898
									ENSMUSG00000086720	Plxna4os3	19.7273
									ENSMUSG00000086843	E030013I19Rik	5.11475
									ENSMUSG00000086844	B230206H07Rik	8.52632
									ENSMUSG00000086962	Gm12248	11.5357
									ENSMUSG00000086968	4933431E20Rik	5.97881
									ENSMUSG00000087002	Gm16277	23
									ENSMUSG00000087047	1700110K17Rik	4.1875
									ENSMUSG00000087190	D430001F17Rik	2.32453
									ENSMUSG00000087249	Gm16062	2.13734
									ENSMUSG00000087266	Gm15991	3.42857
									ENSMUSG00000087302	Sox5os1	2.74775
									ENSMUSG00000087352	Gm12999	2.79567
									ENSMUSG00000087356	Gm13856	2.22581
									ENSMUSG00000087394	Gm12945	3.85915
									ENSMUSG00000087411	Gm16048	5.70958
									ENSMUSG00000087500	Gm12426	2.44667
									ENSMUSG00000087545	Gm13966	5.50602
									ENSMUSG00000087595	1810012K08Rik	2.14626
									ENSMUSG00000087679	C330006A16Rik	2.35597
									ENSMUSG00000087687	Pet100	3.35714
									ENSMUSG00000087698	Gm13031	22.3077
									ENSMUSG00000089635	Gm16559	12.3688
									ENSMUSG00000089713	Gm16564	3.54974
									ENSMUSG00000089715	Cbx6	2.50771
									ENSMUSG00000089832	Shkbp1	6.92593
									ENSMUSG00000089835	Gm7097	2.23899
									ENSMUSG00000089847	Timm10b	2.25234
									ENSMUSG00000090069	E430024P14Rik	6.18471
									ENSMUSG00000090231	Cfb	3.34492
									ENSMUSG00000090272	Mndal	4.36633
									ENSMUSG00000090291	Lrrc10b	10.2
									ENSMUSG00000090307	1700071M16Rik	3.75141
									ENSMUSG00000090639	Gm20425	18.6559
									ENSMUSG00000091160	Gm17133	2.54667
									ENSMUSG00000091228	Gm20390	2.27761
									ENSMUSG00000091393	5330438I03Rik	11.3684
									ENSMUSG00000091423	Gm17509	8.8
									ENSMUSG00000091471	Gm20538	2.66429
									ENSMUSG00000091512	Lamtor3	2.11829
									ENSMUSG00000091549	Gm6548	2.41667
									ENSMUSG00000091803	Cox16	2.01894
									ENSMUSG00000092071	A230065N10Rik	15.075
									ENSMUSG00000092360	Gm20441	2.60947
									ENSMUSG00000092405	Gm20402	2.58635
									ENSMUSG00000092486	2610524H06Rik	6.21622
									ENSMUSG00000092511	Gm20547	5.2214
									ENSMUSG00000093315	Mir5114	3.35028
									ENSMUSG00000093467	Gm20659	2.95361
									ENSMUSG00000093989	Rnasek	2.10054
									ENSMUSG00000094526	Gm21451	7.87805
									ENSMUSG00000094786	Gm14403	4.95238
									ENSMUSG00000094814	Gm21973	52.1197
									ENSMUSG00000094962	Gm21954	15.6818
									ENSMUSG00000095115	Itpripl2	2.09603
									ENSMUSG00000095464	Gm21987	4.22857
									ENSMUSG00000095538	Gm21983	2.33631
									ENSMUSG00000095687	Rnaset2a	3.59016
									ENSMUSG00000096606	Tpbgl	14.5583
									ENSMUSG00000096956	Snhg18	2.75879
									ENSMUSG00000097002	Gm2670	3.9058
									ENSMUSG00000097183	Gm17501	2.30065
									ENSMUSG00000097222	1010001N08Rik	22.4583
									ENSMUSG00000097250	Gm26771	3.98623
									ENSMUSG00000097252	Gm6634	32.9091
									ENSMUSG00000097262	4933416M07Rik	3.55102
									ENSMUSG00000097325	Gm16897	3.65586
									ENSMUSG00000097445	Gm26631	2.66458
									ENSMUSG00000097643	A130051J06Rik	2.97523
									ENSMUSG00000097656	Gm26712	3.13889
									ENSMUSG00000097750	Gm4673	5.0695
									ENSMUSG00000097770	Gm26776	9.26087
									ENSMUSG00000097815	Gm26809	11.5185
									ENSMUSG00000097817	Gm26810	3.48913
									ENSMUSG00000097872	Gm26702	3.64045
									ENSMUSG00000097974	Gm10605	6.37963
									ENSMUSG00000097988	Gm10535	966.667
									ENSMUSG00000097993	Ptprv	469.222
									ENSMUSG00000098332	2310009A05Rik	3.25773
									ENSMUSG00000098465	Mir1668	4.52439
									ENSMUSG00000098489	Mir7678	95.5112
									ENSMUSG00000098666	Mir6950	15.75
									ENSMUSG00000098712	Mir7010	4.39216
									ENSMUSG00000098871	Mir6381	2.54913
									ENSMUSG00000099583	Hist1h3d	2.5125
									ENSMUSG00000100053	Gm28154	6.07407
									ENSMUSG00000100393	Gm29491	2.72093
									ENSMUSG00000101304	Plet1os	12.3947
									ENSMUSG00000101625	Gm29371	69.8254
									ENSMUSG00000101693	Gm19461	27.0714
									ENSMUSG00000101892	9130401M01Rik	2.53586
									ENSMUSG00000102191	Gm36569	8
									ENSMUSG00000102299	Gm37539	4.20101
									ENSMUSG00000102433	Gm38050	2.852
									ENSMUSG00000102644	Thap6	2.225
									ENSMUSG00000102752	Gm7694	5.08527
									ENSMUSG00000103434	Gm36993	10.5743
									ENSMUSG00000103622	Gm38391	3.22569
									ENSMUSG00000104444	Gm33051	2.25222
									ENSMUSG00000104574	Gm42836	4.30702
									ENSMUSG00000104653	Gm43109	24.1026
									ENSMUSG00000104723	Gm43106	2.225
									ENSMUSG00000105211	AC125167.1	6.08828
									ENSMUSG00000105366	Gm43719	3.61538
									ENSMUSG00000105415	Gm44364	5.15323
									ENSMUSG00000105518	Gm42674	115.833
									ENSMUSG00000105617	Gm43809	3.54183
									ENSMUSG00000105873	Gm43708	4.6
									ENSMUSG00000105975	Gm42609	5.18367
									ENSMUSG00000106082	4930404A12Rik	2.10895
									ENSMUSG00000106247	Gm43720	2.3617
									ENSMUSG00000106344	Mir1892	2.18824
									ENSMUSG00000106354	Gm42607	3.17188
									ENSMUSG00000106379	Lhfpl3	11.6316
									ENSMUSG00000106407	Gm43439	3.29617
									ENSMUSG00000106468	AC122844.1	5.01961
									ENSMUSG00000106702	Gm42846	2.21002
									ENSMUSG00000106874	Gm20186	12.9512
									ENSMUSG00000106894	Gm17130	3.0641
									ENSMUSG00000106918	Mrpl33	3.13054
									ENSMUSG00000106933	Gm43621	12.25
									ENSMUSG00000107086	Gm43808	2.09163
									ENSMUSG00000107318	Gm43278	8.075
									ENSMUSG00000107384	Gm42557	10.0833
									ENSMUSG00000107482	Gm45233	2.99502
									ENSMUSG00000107881	Gm44250	3.20482
									ENSMUSG00000107961	Gm44036	2.30275
									ENSMUSG00000107969	Gm44085	3.0068
									ENSMUSG00000107997	Gm44243	2.29878
									ENSMUSG00000108084	Gm7932	136.816
									ENSMUSG00000108511	Gm44987	3.60494
									ENSMUSG00000108596	Itgam	15.95
									ENSMUSG00000109325	Krt8-ps	13.9
									ENSMUSG00000109372	Gm19410	89.5
									ENSMUSG00000109564	Muc16	34.9843
									ENSMUSG00000109735	Gm45667	3.25397
									ENSMUSG00000109812	Gm45640	3.43678
									ENSMUSG00000109866	RP23-248P8.2	2.72368
									ENSMUSG00000109967	RP23-220F20.4	4.26606
									ENSMUSG00000110062	B430319F04Rik	2.36082
									ENSMUSG00000110344	RP23-220F20.2	3.18992
									ENSMUSG00000110428	RP23-431O7.8	9.95714
									ENSMUSG00000110899	RP23-284E19.10	5.24483
									ENSMUSG00000111082	RP23-23P9.5	3.1134
									ENSMUSG00000111187	RP23-386F15.2	3.96421
									ENSMUSG00000111602	RP24-250L13.2	5.70423
									ENSMUSG00000111796	RP24-294A16.4	17.293
									ENSMUSG00000111856	RP23-187B11.7	25.2222
