# Supplementary material
Source: Research Square preprint supplement (doi:10.21203/rs.3.rs-9812305/v1)
Supplement: Supplementary file 10 [file c0a0789a43cf40d3abd04263.xlsx]

## Sheet: Sheet1
Table 5. List of upregulated genes in BC
Common genes in "Up by E4low BC", "Up by E4Hi BC" and "Up by E2 BC"	Common genes in "Up by E2 BC" and "Up by E4Hi BC"	Common genes in "Up by E4low BC" and "Up by E4Hi BC"	Common genes in "Up by E4low BC" and "Up by E2 BC"	Genes specifically upregulated by E2	Genes specifically upregulated by E4low	Genes specifically upregulated by E4Hi
Areg	Aoc1	Ablim3	Adamts9	Abtb2	Acsl4	Acer2
Epgn	Cxcl15	Adgrf5	Adrb2	Adam11	Adcy4	Akr1c14
Ido1	Gpx3	Adgrl4	Aqp3	Afap1l1	Adgrg3	Ank1
Krt15	Greb1	Aqp7	Ccdc64b	Aldh1a3	Als2cl	Ccdc85a
Pcdh17	Krt4	Bcl6b	Dio2	Aldh3a1	Baz1a	Clec10a
Rsad2	Megf11	Btnl9	Dnajb13	Ampd1	Car9	Dleu2
Slc5a5	Pcp4	Cd36	Ereg	Arhgap40	Ccnf	Ednrb
Sptbn5	Ptpn5	Cldn5	Gch1	Asb14	Cd163	Gimap8
Tnip3	S100a14	Clic5	Gjb4	Atg9b	Cd300lg	Ighm
Tph1	Stab2	Csf2rb	Gprc5a	Bdh1	Cd86	Igkc
	Tmprss11a	Cyyr1	Klk10	Bmp3	Chac1	Iigp1
		Flt1	Lonrf3	Casc1	Clcf1	Irf4
		Flt4	Lrp8	Ccl25	Clcn2	March1
		Gbp9	Milr1	Ccnb2	Clec4e	Myct1
		Gimap6	Nipal1	Ccno	Cntn2	P2ry14
		Gpihbp1	Nptx1	Cel	Coch	Rasip1
		H2-Eb1	Ovol1	Ckmt1	Crem	Ryr3
		Hpgds	Sh2d5	Cnksr1	Csf3	Sema7a
		Kdr	Slc20a1	Col11a2	Ctla2a	Sprr2f
		Lyve1	Slc28a3	Col9a1	Cxcl1	Tnfsf10
		Mmrn1	Slc4a11	Crabp2	Cxcl2	Zbtb46
		Neurl3	Slc7a5	Csn1s2a	Depdc7
		Rasgrp3	Slco5a1	Csn2	Dll4
		Robo4	Smox	Ctns	Dysf
		Slc28a2	Sprr1a	Cxcl10	Ern1
		St8sia4	Tfrc	Cyp24a1	F13a1
		Timp4	Trim72	Dhcr24	Fabp4
			Wfdc18	Dlgap5	Fbxo33
			Zdbf2	Dnah11	Fcgr2b
				Dnah17	Fosl1
				Dsg3	Fras1
				Duox1	Gabre
				Enah	Hal
				Esrp2	Hmox1
				Esyt3	Homer1
				Etv4	Id1
				F3	Kif1a
				Fen1	Kif26a
				Foxq1	Lat2
				Gdpd2	Lif
				Glycam1	Lilrb4a
				Gsto1	Mecom
				Hcar2	Mgll
				Hp	Mtfr2
				Ifi202b	Nanos1
				Ifi44	Neat1
				Ifit1	Nfkbid
				Igfbp2	Nod2
				Il1r2	Notch4
				Il33	Nr4a3
				Il4ra	Nrip3
				Irf7	Nuak2
				Irgm1	Oasl1
				Isg15	Olr1
				Itgb6	Pik3r3
				Klf5	Pik3r5
				Krt6a	Polg2
				Lsmem1	Ppif
				mt-Te	Prrg4
				mt-Tp	Psd
				Mx1	Ptgs2
				Mycl	Ramp3
				Ngf	Rasgrf2
				Nlrc5	Retnla
				Nmnat2	Ripk3
				Nptx2	Rnf125
				Nrg1	Rnf149
				Padi3	Rps3a2
				Penk	Rps3a3
				Pgr	Rtl1
				Phactr1	Sesn2
				Pim1	Sh2b2
				Pla2g4b	Sh3tc1
				Plau	Shank3
				Pmaip1	Slc16a10
				Ppm1n	Slc1a1
				Rapgefl1	Slc38a2
				Raver2	Slc5a1
				Rnf213	Stab1
				Rtn2	Stc1
				Rtp4	Tbc1d2
				Sel1l3	Tex30
				Sema4a	Them5
				Serpinb8	Tnf
				Sgk1	Tnfaip2
				Slc1a2	Trim36
				Slc23a1	Ubash3b
				Slc2a9	Ushbp1
				Slfn8	Usp43
				Sncaip
				Spp1
				Stat2
				Stat5a
				Sytl3
				Thsd4
				Tmprss11e
				Tnnt2
				Tspan18
				Tspan33
				Ttc21a
				Usp18
				Vegfa
