# Supplementary material
Source: Research Square preprint supplement (doi:10.21203/rs.3.rs-9812305/v1)
Supplement: Supplementary file 11 [file d0b23105eadc9e45ecac3a46.xlsx]

## Sheet: Sheet1
Table 12. Comparison of upregulated genes upon treatments in fibroblast cells of vagina
Common genes in "Up by E4low fibro.", "Up by E4Hi fibro." and "Up by E2 fibro."	Common genes in "Up by E2 fibro." and "Up by E4Hi fibro."	Common genes in "Up by E4low fibro." and "Up by E4Hi fibro."	Common genes in "Up by E4low fibro." and "Up by E2 fibro."	Genes specifically upregulated by E2	Genes specifically upregulated by E4low	Genes specifically upregulated by E4Hi
a	Adam12	Aff3	Cd55b	Acad12	Adcy4	Abca7
A2m	Ahcy	Ampd3	Emp3	Adam8	Amz2	Adamts6
Adamts2	Ak1	Aqp5	Icam2	Agt	Angptl7	Aldh3b1
Adamtsl2	Angpt4	Atp8b1	Mesdc1	Ankmy1	Arsi	Ankrd46
Adcy1	Ankrd55	Cav1	Mthfd2	Arg1	Cd248	As3mt
Adcy5	Arhgap27	Cd34	Nfkbid	Arhgap4	Cd55	Atp7b
Adgre5	Arl5c	Chst11	Ppp1r14b	Atox1	Cfb	Ccrl2
Adh1	Bace2	Chst13	Scn4a	Atp5e	Cldn3	Cd164
Adora2a	Bnc1	Cmklr1	Serpine2	Atp5j2	Cox17	Cdh23
Agtr2	Bpifc	Dbp		Atp5k	Creld1	Chn1os3
Akr1c14	Bst2	Drp2		Atp5l	Csf1	Ciart
Akr1cl	C4a	Entpd1		Atp6v1f	Csf2rb	Col6a3
Aldh1a2	Capns2	Fibin		Calml3	Csf2rb2	Cpe
Alpl	Cckar	Gdf6		Cand2	Ctr9	Cpt1c
Angptl4	Clstn2	Gins2		Ccdc107	Cxcl16	Cradd
Anxa3	Col6a1	Gpam		Ccl7	Evx1os	Ddx4
Apol6	Cxcl12	Gria1		Cdk2ap2	Flrt1	Dlgap5
Arl4c	Cxcl2	Has2		Chchd1	Frk	Dusp10
Atp8a1	Ddx39	Has2os		Cib1	Hebp2	Dusp14
Bdkrb1	Dennd2a	Hs3st5		Cldn23	Hsd3b7	E2f8
Bdkrb2	Dhcr24	Hspa4		Comtd1	Htra3	Ece2
Bmp8a	Draxin	Kdr		Cox6a1	Htra4	Edem1
C4b	Dsc2	Krt86		Cox6b1	Idh1	Elovl6
Cacna2d3	Dsg1a	Lamc3		Cox7b	Lox	Fat3
Ccdc42	Emb	Lingo2		Cox7c	Lyve1	Fgf12
Ccl11	Ereg	Lnx1		Crabp2	Mettl7a1	Fgf2
Ccl8	Ern1	Lrrc8c		Cryab	Mettl7a3	Flrt2
Cd320	Fcgbp	Mad2l1		Cstb	Mgarp	Flrt3
Cfap54	Fkbp11	Mast2		Ctsh	Mir22	Frmd3
Chn1	Gjb2	Mif4gd		Dancr	Mir22hg	G6pdx
Chst8	Grem2	Nedd4l		Ddah1	Mrvi1	Gas6
Chsy1	Hopx	Npr2		Dmkn	Opn3	Ggt7
Cilp	Igfbp2	Nuak1		Dsg1b	Piwil2	Gli2
Cntn1	Il1r2	Palld		Ecel1	Pon3	Gmds
Col24a1	Il6ra	Per2		Efnb2	Popdc2	Gpr63
Col4a3	Kif5c	Per3		Ehd1	Pparg	Gse1
Col4a4	Klk1	Pip4k2a		Epha10	Ptgis	Hal
Col6a2	Krt2	Plxna2		Epo	Rfk	Hcar2
Col6a4	Lgals3	Prex1		Fth1	Rida	Il11
Colgalt2	Lrat	Prkce		Gadl1	Rps3a3	Itgb3
Csmd1	Lrrc10b	Rad18		Gapdh	Rxfp1	Kcnip4
Dbpht2	Mboat1	Sh3tc2		Golga7b	Slc6a17	Ksr1
Dcbld2	Mug1	Shisa3		Gpsm3	St3gal1	Lamc2
Ddit4l	Myl4	Shpk		Gpx1	Tacr3	Lhfpl3
Dhrs9	Myo18b	Slc25a30		Gpx4	Thbd	Lrrc34
Dio2	Nav2	Slc25a42		H2afj	Upb1	Lrrc8e
Dio3	Nfasc	Sulf2		H2-Q10		Lsmem1
Dnm3	Padi4	Syn3		H2-Q7		Map1a
Dscam	Phf24	Sytl5		Hist1h1a		Mcph1
Ecm1	Pla2g7	Tcam1		Hist1h2ab		Mgat4a
Eif4ebp1	Pm20d1	Tex2		Hist1h2ac		Mir1668
Eml2	Prdx5	Timp3		Hist1h2ad		Mir702
Eva1a	Prr5l	Tmod1		Hist1h2ae		Mir8097
F13a1	Prr7	Treml1		Hist1h2ag		Mycbp
Fabp4	Ptprq	Triobp		Hist1h2ai		Myh14
Fbln2	Rad52	Vldlr		Hist1h2bb		Ncam1
Fbxw17	Rap1gap2	Zcchc16		Hist1h2bc		Ncoa7
Fxyd5	Rhbdf2	Zmynd15		Hist1h2bj		Ndnf
Gdpd2	S100a1			Hist1h2bl		Nmnat2
Gfra1	Sema5b			Hist1h2bn		Nr1d2
Ggt5	Serpinb7			Hist1h2br		Ntrk2
Gja1	Sfn			Hist1h3b		Ntrk3
Gng12	Slc15a3			Hist1h3d		Nudt6
Gpr39	Slc16a12			Hist1h3h		Ovol1
Gpr83	Slc25a39			Hist1h4f		Pak3
Gpx3	Sorcs3			Hist1h4j		Pde8b
Gramd1b	Sox5			Hmga1		Pdia5
Greb1	Spon2			Hoxc11		Peak1
Grin3a	St3gal5			Hspa1a		Peak1os
Grk3	Stc1			Hspb1		Pgd
Hmox1	Tenm4			Igfbp7		Pitpnm3
Hsd11b2	Tgfb1			Irx1		Plscr1
Hspb7	Tnfaip3			Jph2		Ppp3ca
Hunk	Tshr			Kif22		Prkag2
Igf1	Ube2g2			Klk1b27		Prkag2os2
Il16				Krt17		Prom1
Il17ra				Krt42		Rab31
Il31ra				Lamtor4		Rabep1
Il3ra				Lars2		Rapgef2
Inhbb				Lgals1		Rcl1
Irf4				Lgals12		Rras2
Kit				Lgals2		Rrm2
Klk1b21				Lst1		Ryr2
Klk1b24				Ly6a		Slx4ip
Krt13				Ly6c1		Sncaip
Krt16				Ly6c2		Snrk
Krt6a				Ly6i		Snx7
Krt6b				Map1lc3a		Sox18
Krt81				Map3k5		Sphk2
Krt83				Mettl7a2		Ssr3
Krt87				Mir1291		Stk35
Lbp				Mir1843a		Tacc1
Lgr6				Mir1843b		Tenm1
Lhfpl2				Mir1949		Tgfa
Lif				Mir5132		Tmcc3
Ltbp1				Mir6236		Tpcn2
Lypd1				Mir6240		Trerf1
Mboat2				Mir6516		Uhrf1
Msrb2				Mir682		Umps
Msx1				Mrpl52		Usp3
Mtcl1				Mrpl54		Vapa
Mthfd1l				Mrpl57		Vcan
Myrip				Mrps16		Wipi1
Ngfr				Mrps24		Wnt4
Nipal1				mt-Atp6		Zc3h7a
Nog				mt-Co2		Zdhhc14
Nov				mt-Co3		Zfp618
Nppc				mt-Rnr1		Zfp804a
Nr1d1				mt-Rnr2		Znhit6
Nrg1				mt-Ta
Nrg2				mt-Tn
Nrk				Mxd3
Oxct2a				Myeov2
Oxtr				Naa10
P2ry14				Naa38
P4ha3				Ncapd2
Padi2				Ndufa1
Papln				Ndufa11
Pclo				Ndufa3
Pcsk5				Ndufa7
Pgr				Nkain1
Phf21b				Nme2
Phyhip				Nphs1
Pla1a				n-R5-8s1
Plau				n-R5s1
Plod1				n-R5s124
Plod2				n-R5s136
Pmepa1				n-R5s185
Pomt1				n-R5s193
Pramel				n-R5s194
Prlr				n-R5s2
Prrx2				n-R5s33
Prss23				n-R5s64
Prss23os				Nt5c
Ptgdr2				Padi1
Ptpn1				Pcp2
Ptpn5				Pet100
Ptrh1				Pfn1
Raly				Pgls
Ramp2				Phxr4
Ramp3				Plac8
Rgs3				Plet1os
Rgs7				Pold4
Ripk3				Ppbp
S100a4				Rbm47
S1pr1				Rdh12
Sbsn				Rhoc
Scube1				Rmrp
Sdf2l1				Rn18s-rs5
Sdk1				Rn7s1
Serpinb1a				Rn7s2
Sh3gl2				Rn7s6
Slc10a3				Rn7sk
Slc16a6				Rnu11
Slco2a1				Rnu12
Slco5a1				Rnu5g
Smoc1				Rny1
Socs2				Rny3
Sox5os1				Romo1
Spon1				Rpl17
Spta1				Rpl22l1
Srgn				Rpl27a
Ssr4				Rpl29
St3gal6				Rpl32
Stk32b				Rpl36
Tagap				Rpl37a
Thbs2				Rpl37rt
Thy1				Rpl38
Tnfaip8l3				Rpl39
Trabd2b				Rpl41
Trem2				Rpl6l
Trp53inp2				Rplp1
Trpc4				Rpph1
Trpc5				Rprl2
Uck1				Rprl3
Vcam1				Rps10
Wisp2				Rps12
Wnk4				Rps12l1
Zbp1				Rps14
Zxdc				Rps15
				Rps18
				Rps27
				Rps27rt
				S100a10
				S100a13
				S100a6
				S100a8
				S100g
				Scand1
				Scarna10
				Scarna3a
				Scarna3b
				Scarna6
				Scgb1a1
				Sec61b
				Sec61g
				Sele
				Sesn2
				Shisa4
				Slc24a1
				Slc4a5
				Slc6a14
				Snhg15
				Snhg17
				Snhg20
				Snhg3
				Snhg4
				Snora15
				Snora16a
				Snora17
				Snora21
				Snora23
				Snora24
				Snora26
				Snora3
				Snora33
				Snora34
				Snora41
				Snora44
				Snora52
				Snora57
				Snora5c
				Snora64
				Snora68
				Snora70
				Snora73a
				Snora73b
				Snora74a
				Snora78
				Snora7a
				Snora81
				Snora9
				Snord118
				Snord14c
				Snord15b
				Snord16a
				Snord17
				Snord21
				Snord22
				Snord35a
				Snord8
				Snord83b
				Sprr1a
				Sprr2d
				Sprr2f
				Srm
				Thbs4
				Timp1
				Tma7
				Tmprss11b
				Tmprss11g
				Tmsb10
				Trappc1
				Trib3
				Tspo
				Tubg2
				Txn1
				Ube2c
				Uqcc2
				Uqcr10
				Uqcr11
				Uqcrq
				Urah
				Uroc1
				Usmg5
				Uts2
				Vaultrc5
				Wdr38
				Wdr89
				Wnt7b
				Znhit1
