# Supplementary material
Source: Research Square preprint supplement (doi:10.21203/rs.3.rs-9812305/v1)
Supplement: Supplementary file 12 [file d152ceb53dfb58e8dcb23fb0.xlsx]

## Sheet: Sheet 1
Table 2. List of upregulated genes in mammary gland
Upregulated genes upon E2 in ER+LC			Upregulated genes upon E4low in ER+LC			Upregulated genes upon E4Hi in ER+LC			Upregulated genes upon E2 in ER-LC			Upregulated genes upon E4low in ER-LC			Upregulated genes upon E4Hi in ER-LC			Upregulated genes upon E2 in BC			Upregulated genes upon E4low in BC			Upregulated genes upon E4Hi in BC
Gene-ID	Gene-name	Fold change E2/OVX	Gene-ID	Gene-name	Fold change E4low/OVX	Gene-ID	Gene-name	Fold change E4Hi/OVX	Gene-ID	Gene-name	Fold change E2/OVX	Gene-ID	Gene-name	Fold change E4low/OVX	Gene-ID	Gene-Name	Fold change E4Hi/OVX	Gene-ID	Gene-Name	Fold change E2/OVX	Gene-ID	Gene-Name	Fold change E4low/OVX	Gene-ID	Gene-Name	Fold change E4low/OVX
ENSMUSG00000000028	Cdc45	4.32611	ENSMUSG00000000078	Klf6	2.16389	ENSMUSG00000000159	Igsf5	5.3788	ENSMUSG00000000028	Cdc45	2.84661	ENSMUSG00000000792	Slc5a5	7.50413	ENSMUSG00000000792	Slc5a5	18.6063	ENSMUSG00000000308	Ckmt1	5.41935	ENSMUSG00000000317	Bcl6b	3.28464	ENSMUSG00000000317	Bcl6b	3.66125
ENSMUSG00000000159	Igsf5	5.9537	ENSMUSG00000000159	Igsf5	2.98357	ENSMUSG00000000792	Slc5a5	118.295	ENSMUSG00000000381	Wap	7.13984	ENSMUSG00000001305	Rrp15	2.05097	ENSMUSG00000018339	Gpx3	18.3121	ENSMUSG00000000386	Mx1	4.48595	ENSMUSG00000000792	Slc5a5	8.28109	ENSMUSG00000000318	Clec10a	7.47822
ENSMUSG00000000216	Scnn1g	4.99273	ENSMUSG00000000792	Slc5a5	118.083	ENSMUSG00000001403	Ube2c	4.11023	ENSMUSG00000000386	Mx1	5.07383	ENSMUSG00000001707	Eef1e1	2.04967	ENSMUSG00000024087	Cyp1b1	12.3738	ENSMUSG00000000792	Slc5a5	18.3876	ENSMUSG00000000983	Wfdc18	3.02838	ENSMUSG00000000792	Slc5a5	21.7902
ENSMUSG00000000295	Hddc2	2.11136	ENSMUSG00000001027	Scn4a	6.83763	ENSMUSG00000001870	Ltbp1	6.88058	ENSMUSG00000000792	Slc5a5	7.64423	ENSMUSG00000003541	Ier3	2.51808	ENSMUSG00000029375	Cxcl15	28.3142	ENSMUSG00000000983	Wfdc18	6.63236	ENSMUSG00000002944	Cd36	4.2271	ENSMUSG00000002944	Cd36	4.76656
ENSMUSG00000000296	Tpd52l1	2.56245	ENSMUSG00000001036	Epn2	2.14317	ENSMUSG00000002274	Metrn	5.48896	ENSMUSG00000000983	Wfdc18	4.23347	ENSMUSG00000004446	Bid	2.65373	ENSMUSG00000029378	Areg	5.69701	ENSMUSG00000001763	Tspan33	2.49973	ENSMUSG00000005057	Sh2b2	2.3408	ENSMUSG00000006204	5430419D17Rik	15.2272
ENSMUSG00000000320	Alox12	14.3867	ENSMUSG00000001228	Uhrf1	2.11263	ENSMUSG00000002289	Angptl4	3.00584	ENSMUSG00000001228	Uhrf1	3.51303	ENSMUSG00000004540	Psg17	5.42828	ENSMUSG00000029811	Aoc1	12.7993	ENSMUSG00000004043	Stat5a	2.28848	ENSMUSG00000005413	Hmox1	5.00324	ENSMUSG00000018339	Gpx3	6.11946
ENSMUSG00000000386	Mx1	4.60664	ENSMUSG00000001870	Ltbp1	4.24065	ENSMUSG00000003153	Slc2a3	72.0338	ENSMUSG00000001403	Ube2c	2.56868	ENSMUSG00000004891	Nes	3.15366	ENSMUSG00000030854	Ptpn5	8.42729	ENSMUSG00000004885	Crabp2	2.10828	ENSMUSG00000006204	5430419D17Rik	10.7185	ENSMUSG00000020357	Flt4	6.53308
ENSMUSG00000000420	Galnt1	2.57198	ENSMUSG00000002222	Rmnd5a	2.10655	ENSMUSG00000004043	Stat5a	3.25061	ENSMUSG00000002055	Spag5	2.85148	ENSMUSG00000005054	Cstb	2.16528	ENSMUSG00000036523	Greb1	12.7305	ENSMUSG00000005089	Slc1a2	4.42411	ENSMUSG00000007617	Homer1	3.36848	ENSMUSG00000020641	Rsad2	12.2391
ENSMUSG00000000628	Hk2	2.77973	ENSMUSG00000002289	Angptl4	3.54798	ENSMUSG00000004698	Hdac9	4.74786	ENSMUSG00000002835	Chaf1a	2.12541	ENSMUSG00000005514	Por	2.03812	ENSMUSG00000038567	Cyp24a1	2.64357	ENSMUSG00000005107	Slc2a9	2.17546	ENSMUSG00000007682	Dio2	3.14887	ENSMUSG00000021356	Irf4	4.60374
ENSMUSG00000000792	Slc5a5	97.5582	ENSMUSG00000002409	Dyrk1b	2.10283	ENSMUSG00000005362	Crbn	2.25948	ENSMUSG00000002870	Mcm2	2.53735	ENSMUSG00000005667	Mthfd2	5.63144	ENSMUSG00000050359	Sprr1a	2.96637	ENSMUSG00000005148	Klf5	2.821	ENSMUSG00000008845	Cd163	6.57059	ENSMUSG00000022122	Ednrb	3.6285
ENSMUSG00000000983	Wfdc18	2.84622	ENSMUSG00000002459	Rgs20	2.84421	ENSMUSG00000005364	Il5ra	42.7595	ENSMUSG00000003153	Slc2a3	4.29348	ENSMUSG00000006204	5430419D17Rik	21.4255	ENSMUSG00000051081	Gm4847	32.0716	ENSMUSG00000005949	Ctns	2.25243	ENSMUSG00000009772	Nuak2	2.25595	ENSMUSG00000022579	Gpihbp1	6.58012
ENSMUSG00000001027	Scn4a	15.0332	ENSMUSG00000002565	Scin	3.81681	ENSMUSG00000005609	Ctr9	7.34098	ENSMUSG00000003355	Fkbp11	2.66707	ENSMUSG00000006818	Sod2	2.25717	ENSMUSG00000059668	Krt4	6.60513	ENSMUSG00000007682	Dio2	5.00071	ENSMUSG00000011034	Slc5a1	2.63737	ENSMUSG00000023959	Clic5	6.14966
ENSMUSG00000001228	Uhrf1	7.04024	ENSMUSG00000002688	Prkd1	2.27736	ENSMUSG00000005667	Mthfd2	4.96142	ENSMUSG00000005107	Slc2a9	2.6524	ENSMUSG00000014599	Csf1	3.02209	ENSMUSG00000072845	Tmprss11a	12.5102	ENSMUSG00000015134	Aldh1a3	2.7451	ENSMUSG00000014602	Kif1a	3.06536	ENSMUSG00000027219	Slc28a2	5.57225
ENSMUSG00000001300	Efnb2	3.6842	ENSMUSG00000002885	Adgre5	2.95279	ENSMUSG00000005871	Apc	3.46243	ENSMUSG00000005410	Mcm5	3.17052	ENSMUSG00000015501	Hivep2	2.4824	ENSMUSG00000090223	Pcp4	7.57779	ENSMUSG00000016239	Lonrf3	2.52071	ENSMUSG00000014813	Stc1	2.6027	ENSMUSG00000027583	Zbtb46	2.83367
ENSMUSG00000001403	Ube2c	9.35999	ENSMUSG00000003153	Slc2a3	12.4738	ENSMUSG00000005949	Ctns	13.4915	ENSMUSG00000006345	Ggt1	2.46531	ENSMUSG00000018339	Gpx3	2.85138				ENSMUSG00000017724	Etv4	2.33466	ENSMUSG00000015468	Notch4	2.84679	ENSMUSG00000028427	Aqp7	7.11418
ENSMUSG00000001467	Cyp51	3.19203	ENSMUSG00000003721	Insig2	2.04993	ENSMUSG00000005951	Shpk	9.6984	ENSMUSG00000006398	Cdc20	2.11883	ENSMUSG00000020009	Ifngr1	2.07507				ENSMUSG00000018339	Gpx3	6.52663	ENSMUSG00000016239	Lonrf3	3.28615	ENSMUSG00000029298	Gbp9	3.76153
ENSMUSG00000001517	Foxm1	3.40455	ENSMUSG00000004043	Stat5a	2.68734	ENSMUSG00000006204	5430419D17Rik	262.778	ENSMUSG00000007080	Pole	3.19554	ENSMUSG00000020116	Pno1	2.10892				ENSMUSG00000018581	Dnah11	3.17249	ENSMUSG00000017309	Cd300lg	4.38527	ENSMUSG00000029375	Cxcl15	17.5128
ENSMUSG00000001642	Akr1b3	5.31874	ENSMUSG00000004221	Ikbkg	2.19236	ENSMUSG00000006345	Ggt1	22.2475	ENSMUSG00000007682	Dio2	3.57277	ENSMUSG00000020571	Pdia6	2.067				ENSMUSG00000019102	Aldh3a1	7.53117	ENSMUSG00000019838	Slc16a10	2.82274	ENSMUSG00000029378	Areg	7.73919
ENSMUSG00000001870	Ltbp1	9.10694	ENSMUSG00000004383	Large1	2.65315	ENSMUSG00000006398	Cdc20	2.95308	ENSMUSG00000009394	Syn2	3.0684	ENSMUSG00000021281	Tnfaip2	3.79915				ENSMUSG00000019359	Gdpd2	10.1609	ENSMUSG00000019992	Mtfr2	3.24362	ENSMUSG00000029648	Flt1	5.55048
ENSMUSG00000002055	Spag5	5.72499	ENSMUSG00000004661	Arid3b	2.19258	ENSMUSG00000009394	Syn2	14.0467	ENSMUSG00000010307	Tmem86a	4.94797	ENSMUSG00000021367	Edn1	2.42412				ENSMUSG00000019970	Sgk1	2.85803	ENSMUSG00000020017	Hal	3.23013	ENSMUSG00000029811	Aoc1	11.2869
ENSMUSG00000002228	Ppm1j	2.04458	ENSMUSG00000004988	Fxyd4	3.34232	ENSMUSG00000010307	Tmem86a	42.6144	ENSMUSG00000010529	Gm266	2.82396	ENSMUSG00000021509	Slc25a48	3.25495				ENSMUSG00000020381	3010026O09Rik	3.02037	ENSMUSG00000020357	Flt4	4.44512	ENSMUSG00000029919	Hpgds	3.39604
ENSMUSG00000002274	Metrn	7.91347	ENSMUSG00000005362	Crbn	2.4249	ENSMUSG00000013736	Trnt1	3.6001	ENSMUSG00000012443	Kif11	2.91589	ENSMUSG00000021822	Plau	3.36595				ENSMUSG00000020641	Rsad2	5.25657	ENSMUSG00000020381	3010026O09Rik	2.85163	ENSMUSG00000030317	Timp4	6.25808
ENSMUSG00000002308	Cd320	3.42749	ENSMUSG00000005364	Il5ra	34.0549	ENSMUSG00000015647	Lama5	3.05783	ENSMUSG00000012519	Mlkl	2.06638	ENSMUSG00000022111	Uchl3	2.703				ENSMUSG00000020926	Adam11	5.14656	ENSMUSG00000020641	Rsad2	9.13117	ENSMUSG00000030787	Lyve1	6.95382
ENSMUSG00000002565	Scin	3.48424	ENSMUSG00000005609	Ctr9	3.18637	ENSMUSG00000015880	Ncapg	4.69392	ENSMUSG00000014813	Stc1	4.1646	ENSMUSG00000022241	Tars	2.32504				ENSMUSG00000021553	Slc28a3	7.03764	ENSMUSG00000020715	Ern1	2.8233	ENSMUSG00000030854	Ptpn5	12.3472
ENSMUSG00000002870	Mcm2	2.95236	ENSMUSG00000005667	Mthfd2	2.39883	ENSMUSG00000015882	Lcorl	4.83642	ENSMUSG00000015880	Ncapg	2.26635	ENSMUSG00000022332	Khdrbs3	3.69292				ENSMUSG00000021822	Plau	3.51575	ENSMUSG00000020718	Polg2	2.50992	ENSMUSG00000031543	Ank1	2.75547
ENSMUSG00000003153	Slc2a3	80.0816	ENSMUSG00000005871	Apc	3.91128	ENSMUSG00000016150	Tenm1	5.61987	ENSMUSG00000016024	Lbp	2.3617	ENSMUSG00000022512	Cldn1	3.51436				ENSMUSG00000021898	Asb14	3.6498	ENSMUSG00000020901	Pik3r5	5.57639	ENSMUSG00000031551	Ido1	17.5423
ENSMUSG00000003355	Fkbp11	3.59611	ENSMUSG00000005949	Ctns	10.8799	ENSMUSG00000017002	Slpi	18.1836	ENSMUSG00000016763	Scube1	2.71345	ENSMUSG00000022514	Il1rap	2.63044				ENSMUSG00000022491	Glycam1	19.6161	ENSMUSG00000020905	Usp43	3.289	ENSMUSG00000032125	Robo4	6.07813
ENSMUSG00000003541	Ier3	2.10148	ENSMUSG00000005951	Shpk	11.0786	ENSMUSG00000018339	Gpx3	26.7701	ENSMUSG00000017146	Brca1	2.62431	ENSMUSG00000023106	Denr	2.67589				ENSMUSG00000022797	Tfrc	2.45942	ENSMUSG00000020953	Coch	5.03479	ENSMUSG00000032735	Ablim3	5.64763
ENSMUSG00000003779	Kif20a	2.82809	ENSMUSG00000005968	Tuft1	3.10231	ENSMUSG00000018340	Anxa6	2.83841	ENSMUSG00000017499	Cdc6	2.52507	ENSMUSG00000023272	Creld2	2.60831				ENSMUSG00000022995	Enah	2.09046	ENSMUSG00000021281	Tnfaip2	3.77249	ENSMUSG00000032878	Ccdc85a	5.83223
ENSMUSG00000003955	Fam162a	2.27189	ENSMUSG00000006154	Eps8l1	3.27805	ENSMUSG00000018581	Dnah11	14.1887	ENSMUSG00000017830	Dhx58	2.46945	ENSMUSG00000024087	Cyp1b1	4.54713				ENSMUSG00000023235	Ccl25	2.34461	ENSMUSG00000021294	Kif26a	2.29514	ENSMUSG00000033715	Akr1c14	6.22649
ENSMUSG00000004043	Stat5a	2.87193	ENSMUSG00000006204	5430419D17Rik	153.828	ENSMUSG00000018906	P4ha2	3.39753	ENSMUSG00000018339	Gpx3	12.8721	ENSMUSG00000024587	Nars	2.50003				ENSMUSG00000023951	Vegfa	2.1473	ENSMUSG00000021553	Slc28a3	8.02641	ENSMUSG00000035020	Epgn	18.2481
ENSMUSG00000004446	Bid	2.57406	ENSMUSG00000006345	Ggt1	23.8595	ENSMUSG00000018924	Alox15	48.4959	ENSMUSG00000019942	Cdk1	2.70132	ENSMUSG00000024640	Psat1	4.28793				ENSMUSG00000024014	Pim1	2.14052	ENSMUSG00000021708	Rasgrf2	2.38889	ENSMUSG00000035459	Stab2	3.80603
ENSMUSG00000004698	Hdac9	19.9298	ENSMUSG00000006641	Slc5a6	9.66992	ENSMUSG00000020032	Nuak1	3.51278	ENSMUSG00000020062	Slc5a8	6.19294	ENSMUSG00000024727	Trpm6	3.03882				ENSMUSG00000024330	Col11a2	2.62914	ENSMUSG00000021868	Ppif	2.22238	ENSMUSG00000035566	Pcdh17	3.97135
ENSMUSG00000004885	Crabp2	5.02604	ENSMUSG00000009394	Syn2	11.8773	ENSMUSG00000020062	Slc5a8	6.05667	ENSMUSG00000020330	Hmmr	2.67301	ENSMUSG00000025885	Myo5b	3.14565				ENSMUSG00000024354	Slc23a1	2.22686	ENSMUSG00000022220	Adcy4	2.82006	ENSMUSG00000036381	P2ry14	2.6253
ENSMUSG00000005089	Slc1a2	2.69312	ENSMUSG00000009647	Mcu	2.42637	ENSMUSG00000020108	Ddit4	3.43772	ENSMUSG00000020614	Fam20a	2.83118	ENSMUSG00000025912	Mybl1	2.52725				ENSMUSG00000024521	Pmaip1	2.15782	ENSMUSG00000022221	Ripk3	2.48103	ENSMUSG00000036466	Megf11	2.76865
ENSMUSG00000005233	Spc25	4.42959	ENSMUSG00000010025	Aldh3a2	2.48269	ENSMUSG00000020330	Hmmr	3.51146	ENSMUSG00000020638	Cmpk2	3.03552	ENSMUSG00000025921	Rdh10	2.52167				ENSMUSG00000024534	Sncaip	2.68095	ENSMUSG00000022462	Slc38a2	2.31525	ENSMUSG00000036469	March1	4.06091
ENSMUSG00000005362	Crbn	2.54858	ENSMUSG00000010307	Tmem86a	33.0155	ENSMUSG00000020577	Tspan13	2.87615	ENSMUSG00000020641	Rsad2	5.28129	ENSMUSG00000025995	Wdr75	2.11317				ENSMUSG00000024742	Fen1	2.40775	ENSMUSG00000022579	Gpihbp1	3.66384	ENSMUSG00000036523	Greb1	10.2552
ENSMUSG00000005364	Il5ra	49.128	ENSMUSG00000011589	Fsd1	2.20362	ENSMUSG00000020590	Snx13	3.46124	ENSMUSG00000020649	Rrm2	2.88901	ENSMUSG00000026971	Itgb6	3.38936				ENSMUSG00000024810	Il33	3.82724	ENSMUSG00000022623	Shank3	3.53282	ENSMUSG00000038007	Acer2	2.3748
ENSMUSG00000005410	Mcm5	4.79489	ENSMUSG00000012350	Ehf	2.20227	ENSMUSG00000020646	Mboat2	2.59982	ENSMUSG00000020914	Top2a	3.1195	ENSMUSG00000027171	Prrg4	4.25155				ENSMUSG00000024922	Ovol1	2.89797	ENSMUSG00000022797	Tfrc	3.57796	ENSMUSG00000038264	Sema7a	3.64676
ENSMUSG00000005609	Ctr9	13.2429	ENSMUSG00000013736	Trnt1	3.54897	ENSMUSG00000020715	Ern1	6.33161	ENSMUSG00000022021	Diaph3	3.36272	ENSMUSG00000027173	Depdc7	3.48671				ENSMUSG00000025068	Gsto1	2.88952	ENSMUSG00000022843	Clcn2	2.29201	ENSMUSG00000039167	Adgrl4	5.52623
ENSMUSG00000005667	Mthfd2	2.40535	ENSMUSG00000013766	Ly6g6e	2.70557	ENSMUSG00000020774	Aspa	10.2975	ENSMUSG00000022025	Lect1	2.41422	ENSMUSG00000027300	Ubox5	2.05082				ENSMUSG00000025328	Padi3	4.66432	ENSMUSG00000022901	Cd86	4.94548	ENSMUSG00000039304	Tnfsf10	2.57738
ENSMUSG00000005871	Apc	4.61439	ENSMUSG00000015533	Itga2	7.00435	ENSMUSG00000020788	Atp2a3	5.85166	ENSMUSG00000022033	Pbk	2.94741	ENSMUSG00000027313	Chac1	7.12538				ENSMUSG00000025498	Irf7	2.69359	ENSMUSG00000023959	Clic5	3.07305	ENSMUSG00000040046	Tph1	17.5072
ENSMUSG00000005949	Ctns	24.9969	ENSMUSG00000015647	Lama5	3.14944	ENSMUSG00000020914	Top2a	4.18374	ENSMUSG00000022332	Khdrbs3	7.47358	ENSMUSG00000027333	Smox	3.6031				ENSMUSG00000025582	Nptx1	2.95332	ENSMUSG00000024401	Tnf	3.33507	ENSMUSG00000040283	Btnl9	11.2316
ENSMUSG00000005951	Shpk	12.8181	ENSMUSG00000015812	Gnrh1	3.44245	ENSMUSG00000021223	Papln	3.53053	ENSMUSG00000023015	Racgap1	3.01022	ENSMUSG00000027356	Fermt1	2.57858				ENSMUSG00000025938	Slco5a1	3.03716	ENSMUSG00000024912	Fosl1	2.339	ENSMUSG00000040710	St8sia4	5.8585
ENSMUSG00000005968	Tuft1	2.58417	ENSMUSG00000015880	Ncapg	3.31974	ENSMUSG00000021356	Irf4	7.4387	ENSMUSG00000023505	Cdca3	3.08368	ENSMUSG00000027357	Crls1	2.1371				ENSMUSG00000026073	Il1r2	18.222	ENSMUSG00000024922	Ovol1	2.77238	ENSMUSG00000041134	Cyyr1	6.19653
ENSMUSG00000006154	Eps8l1	3.09403	ENSMUSG00000015882	Lcorl	2.90155	ENSMUSG00000021795	Sftpd	8.51885	ENSMUSG00000024087	Cyp1b1	2.82239	ENSMUSG00000027562	Car2	2.23219				ENSMUSG00000026147	Col9a1	5.57058	ENSMUSG00000024935	Slc1a1	2.951	ENSMUSG00000041378	Cldn5	5.3387
ENSMUSG00000006204	5430419D17Rik	18.9365	ENSMUSG00000016128	Stard13	3.04959	ENSMUSG00000021994	Wnt5a	3.50339	ENSMUSG00000024742	Fen1	2.59169	ENSMUSG00000027800	Tm4sf1	2.24491				ENSMUSG00000026315	Serpinb8	3.18839	ENSMUSG00000025582	Nptx1	3.27608	ENSMUSG00000042306	S100a14	2.97812
ENSMUSG00000006342	Susd2	2.94278	ENSMUSG00000016150	Tenm1	4.74671	ENSMUSG00000022021	Diaph3	3.46393	ENSMUSG00000024810	Il33	7.2451	ENSMUSG00000027859	Ngf	5.26902				ENSMUSG00000026414	Tnnt2	2.95299	ENSMUSG00000025938	Slco5a1	2.86428	ENSMUSG00000044162	Tnip3	4.70178
ENSMUSG00000006345	Ggt1	19.9063	ENSMUSG00000016995	Matn4	3.5303	ENSMUSG00000022090	Pdlim2	2.56406	ENSMUSG00000024903	Lao1	12.1802	ENSMUSG00000028128	F3	3.58423				ENSMUSG00000026535	Ifi202b	4.26988	ENSMUSG00000026049	Tex30	2.36379	ENSMUSG00000044562	Rasip1	3.69872
ENSMUSG00000006398	Cdc20	7.4938	ENSMUSG00000017607	Tns4	3.50467	ENSMUSG00000022533	Atp13a3	6.08718	ENSMUSG00000024989	Cep55	2.36389	ENSMUSG00000028195	Cyr61	2.75709				ENSMUSG00000026818	Cel	8.9553	ENSMUSG00000026656	Fcgr2b	2.85398	ENSMUSG00000046916	Myct1	3.41796
ENSMUSG00000006494	Pdk1	2.03978	ENSMUSG00000017723	Wfdc2	2.377	ENSMUSG00000022824	Muc13	4.33321	ENSMUSG00000025001	Hells	3.77703	ENSMUSG00000028435	Aqp3	3.80904				ENSMUSG00000026971	Itgb6	3.33772	ENSMUSG00000027171	Prrg4	3.38609	ENSMUSG00000047180	Neurl3	5.46173
ENSMUSG00000006641	Slc5a6	2.12796	ENSMUSG00000017943	Gdap1l1	2.56847	ENSMUSG00000022995	Enah	2.7238	ENSMUSG00000025498	Irf7	3.06468	ENSMUSG00000028796	Phc2	2.25214				ENSMUSG00000027217	Tspan18	2.98427	ENSMUSG00000027173	Depdc7	2.55027	ENSMUSG00000047867	Gimap6	5.08804
ENSMUSG00000006715	Gmnn	4.37304	ENSMUSG00000018102	Hist1h2bc	2.15716	ENSMUSG00000023011	Faim2	20.531	ENSMUSG00000026073	Il1r2	6.43212	ENSMUSG00000029371	Cxcl5	6.87941				ENSMUSG00000027333	Smox	2.86701	ENSMUSG00000027219	Slc28a2	3.28895	ENSMUSG00000050635	Sprr2f	5.84354
ENSMUSG00000007080	Pole	4.55773	ENSMUSG00000018339	Gpx3	14.0289	ENSMUSG00000023015	Racgap1	3.51702	ENSMUSG00000026147	Col9a1	7.59566	ENSMUSG00000029378	Areg	4.463				ENSMUSG00000027397	Slc20a1	2.78424	ENSMUSG00000027313	Chac1	4.58627	ENSMUSG00000053541	Gm4759	4.07036
ENSMUSG00000007682	Dio2	8.52892	ENSMUSG00000018425	Dhx40	4.0879	ENSMUSG00000023505	Cdca3	3.09459	ENSMUSG00000026605	Cenpf	2.76895	ENSMUSG00000029380	Cxcl1	4.14338				ENSMUSG00000027520	Zdbf2	3.25435	ENSMUSG00000027314	Dll4	2.83223	ENSMUSG00000054072	Iigp1	4.08107
ENSMUSG00000007721	Ccdc124	2.32246	ENSMUSG00000018442	Derl2	2.39984	ENSMUSG00000024331	Dsc2	3.20499	ENSMUSG00000026818	Cel	7.82284	ENSMUSG00000029484	Anxa3	4.43219				ENSMUSG00000027859	Ngf	2.39727	ENSMUSG00000027333	Smox	3.34094	ENSMUSG00000054146	Krt15	4.45634
ENSMUSG00000009394	Syn2	6.99686	ENSMUSG00000018581	Dnah11	4.5705	ENSMUSG00000024640	Psat1	3.93445	ENSMUSG00000027224	Duoxa1	3.38203	ENSMUSG00000029552	Tes	2.49948				ENSMUSG00000028037	Ifi44	3.33335	ENSMUSG00000027397	Slc20a1	3.39145	ENSMUSG00000054641	Mmrn1	9.16059
ENSMUSG00000010307	Tmem86a	73.153	ENSMUSG00000018906	P4ha2	2.93454	ENSMUSG00000024892	Pcx	12.7196	ENSMUSG00000027306	Nusap1	3.45674	ENSMUSG00000029752	Asns	2.45765				ENSMUSG00000028064	Sema4a	2.77515	ENSMUSG00000027520	Zdbf2	4.2158	ENSMUSG00000056492	Adgrf5	3.48776
ENSMUSG00000010609	Psen2	2.31447	ENSMUSG00000018924	Alox15	61.7729	ENSMUSG00000025001	Hells	2.41419	ENSMUSG00000027326	Knl1	2.28807	ENSMUSG00000030471	Zdhhc13	2.38145				ENSMUSG00000028128	F3	6.96248	ENSMUSG00000027654	Fam83d	2.52307	ENSMUSG00000057378	Ryr3	3.25975
ENSMUSG00000010660	Plcd1	2.14203	ENSMUSG00000019851	Perp	2.18702	ENSMUSG00000025068	Gsto1	3.39685	ENSMUSG00000027331	Knstrn	2.75609	ENSMUSG00000030693	Klk10	3.42206				ENSMUSG00000028435	Aqp3	3.95205	ENSMUSG00000027684	Mecom	2.23283	ENSMUSG00000059668	Krt4	17.2866
ENSMUSG00000011752	Pgam1	2.42602	ENSMUSG00000019992	Mtfr2	3.37955	ENSMUSG00000025105	Bnc1	17.1651	ENSMUSG00000027379	Bub1	2.51843	ENSMUSG00000031089	Slc6a14	3.43152				ENSMUSG00000028613	Lrp8	2.29699	ENSMUSG00000028148	Them5	5.90785	ENSMUSG00000060586	H2-Eb1	14.631
ENSMUSG00000012443	Kif11	5.29435	ENSMUSG00000020023	Tmcc3	4.05876	ENSMUSG00000025209	Twnk	3.97217	ENSMUSG00000027447	Cst3	3.77609	ENSMUSG00000031490	Eif4ebp1	2.5859				ENSMUSG00000028654	Mycl	3.70661	ENSMUSG00000028341	Nr4a3	2.41819	ENSMUSG00000062960	Kdr	8.28561
ENSMUSG00000012519	Mlkl	2.57759	ENSMUSG00000020024	Cep83	3.48931	ENSMUSG00000025328	Padi3	15.9754	ENSMUSG00000027469	Tpx2	3.1986	ENSMUSG00000031604	Msmo1	2.50439				ENSMUSG00000028841	Cnksr1	2.062	ENSMUSG00000028427	Aqp7	5.28004	ENSMUSG00000063286	Gm8995	4.16914
ENSMUSG00000013736	Trnt1	5.12087	ENSMUSG00000020032	Nuak1	3.13023	ENSMUSG00000025330	Padi4	3.22382	ENSMUSG00000027490	E2f1	2.47743	ENSMUSG00000031770	Herpud1	2.4046				ENSMUSG00000029189	Sel1l3	2.61331	ENSMUSG00000028435	Aqp3	4.40666	ENSMUSG00000064262	Gimap8	5.03884
ENSMUSG00000014547	Wdfy2	2.39237	ENSMUSG00000020099	Unc5b	2.64251	ENSMUSG00000025357	Dgka	2.52971	ENSMUSG00000027699	Ect2	3.34123	ENSMUSG00000031955	Bcar1	2.38591				ENSMUSG00000029304	Spp1	3.33306	ENSMUSG00000028463	Car9	2.68542	ENSMUSG00000071042	Rasgrp3	4.8685
ENSMUSG00000015533	Itga2	3.97687	ENSMUSG00000020142	Slc1a4	4.45689	ENSMUSG00000025608	Podxl	5.26021	ENSMUSG00000027715	Ccna2	2.59613	ENSMUSG00000032115	Hyou1	2.26181				ENSMUSG00000029335	Bmp3	5.91521	ENSMUSG00000028613	Lrp8	3.50587	ENSMUSG00000071713	Csf2rb	4.74725
ENSMUSG00000015647	Lama5	3.99083	ENSMUSG00000020246	Hcfc2	2.64849	ENSMUSG00000026343	Gpr39	5.99491	ENSMUSG00000028037	Ifi44	3.07992	ENSMUSG00000032715	Trib3	3.4837				ENSMUSG00000029375	Cxcl15	27.7382	ENSMUSG00000028698	Pik3r3	2.17172	ENSMUSG00000072845	Tmprss11a	7.48688
ENSMUSG00000015668	Pdzd11	2.46489	ENSMUSG00000020303	Stc2	4.14809	ENSMUSG00000026347	Tmem163	4.61853	ENSMUSG00000028068	Iqgap3	3.55065	ENSMUSG00000034394	Lif	3.76433				ENSMUSG00000029377	Ereg	2.84384	ENSMUSG00000028893	Sesn2	2.80993	ENSMUSG00000074899	Sptbn5	2.89239
ENSMUSG00000015880	Ncapg	6.41084	ENSMUSG00000020381	3010026O09Rik	4.21484	ENSMUSG00000026473	Glul	3.49277	ENSMUSG00000028128	F3	3.78009	ENSMUSG00000035020	Epgn	5.11614				ENSMUSG00000029378	Areg	6.30169	ENSMUSG00000029298	Gbp9	2.17013	ENSMUSG00000076609	Igkc	18.2516
ENSMUSG00000015882	Lcorl	5.90265	ENSMUSG00000020577	Tspan13	3.05603	ENSMUSG00000026479	Lamc2	7.28355	ENSMUSG00000028268	Gbp3	2.3996	ENSMUSG00000035095	Fam167a	3.99669				ENSMUSG00000029811	Aoc1	11.0942	ENSMUSG00000029377	Ereg	2.92368	ENSMUSG00000076617	Ighm	10.9038
ENSMUSG00000016150	Tenm1	4.34449	ENSMUSG00000020590	Snx13	3.85191	ENSMUSG00000026605	Cenpf	4.1295	ENSMUSG00000028718	Stil	2.54243	ENSMUSG00000036902	Neto2	2.51792				ENSMUSG00000030022	Adamts9	2.87249	ENSMUSG00000029378	Areg	4.01951	ENSMUSG00000090223	Pcp4	5.03026
ENSMUSG00000016344	Ppdpf	2.12847	ENSMUSG00000020649	Rrm2	2.45216	ENSMUSG00000026827	Gpd2	2.71907	ENSMUSG00000028832	Stmn1	2.67307	ENSMUSG00000037405	Icam1	3.22898				ENSMUSG00000030107	Usp18	3.47554	ENSMUSG00000029380	Cxcl1	2.60352	ENSMUSG00000097589	Dleu2	2.80764
ENSMUSG00000017002	Slpi	22.6189	ENSMUSG00000020715	Ern1	4.34025	ENSMUSG00000027035	Cers6	3.93234	ENSMUSG00000029304	Spp1	2.54366	ENSMUSG00000037580	Gch1	2.55094				ENSMUSG00000030401	Rtn2	2.61414	ENSMUSG00000029648	Flt1	3.20929	ENSMUSG00000108394	Gm45477	2.24558
ENSMUSG00000017146	Brca1	2.468	ENSMUSG00000020718	Polg2	2.77585	ENSMUSG00000027134	Lpcat4	3.49145	ENSMUSG00000029375	Cxcl15	23.2652	ENSMUSG00000038067	Csf3	4.1151				ENSMUSG00000030402	Ppm1n	3.26733	ENSMUSG00000029919	Hpgds	3.12809
ENSMUSG00000017167	Cntnap1	3.94157	ENSMUSG00000020758	Itgb4	2.56785	ENSMUSG00000027306	Nusap1	2.72664	ENSMUSG00000029378	Areg	3.89633	ENSMUSG00000038311	2410017I17Rik	3.35834				ENSMUSG00000030693	Klk10	4.02465	ENSMUSG00000030022	Adamts9	3.7291
ENSMUSG00000017210	Med24	2.43166	ENSMUSG00000020865	Abcc3	3.02084	ENSMUSG00000027356	Fermt1	9.93816	ENSMUSG00000029414	Kntc1	3.33862	ENSMUSG00000039232	Stx11	2.55361				ENSMUSG00000030708	Dnajb13	2.50526	ENSMUSG00000030142	Clec4e	8.65471
ENSMUSG00000017499	Cdc6	2.31193	ENSMUSG00000020911	Krt19	2.33609	ENSMUSG00000027715	Ccna2	2.46202	ENSMUSG00000029730	Mcm7	2.17695	ENSMUSG00000039725	Trp53rka	2.1049				ENSMUSG00000030748	Il4ra	2.79543	ENSMUSG00000030162	Olr1	5.2488
ENSMUSG00000017607	Tns4	12.4737	ENSMUSG00000020914	Top2a	2.75121	ENSMUSG00000028068	Iqgap3	3.54667	ENSMUSG00000029811	Aoc1	8.34029	ENSMUSG00000040010	Slc7a5	2.49274				ENSMUSG00000030854	Ptpn5	10.4025	ENSMUSG00000030317	Timp4	3.31877
ENSMUSG00000017716	Birc5	6.48343	ENSMUSG00000020937	Plcd3	2.94187	ENSMUSG00000028082	Sh3d19	4.13099	ENSMUSG00000030107	Usp18	4.03994	ENSMUSG00000040152	Thbs1	3.994				ENSMUSG00000031551	Ido1	12.3247	ENSMUSG00000030693	Klk10	6.99326
ENSMUSG00000018339	Gpx3	25.944	ENSMUSG00000021061	Sptb	2.37571	ENSMUSG00000028085	Gatb	5.10475	ENSMUSG00000030246	Ldhb	2.19507	ENSMUSG00000040829	Zmynd15	2.27482				ENSMUSG00000031722	Hp	7.44531	ENSMUSG00000030708	Dnajb13	3.08561
ENSMUSG00000018340	Anxa6	3.81057	ENSMUSG00000021171	Esyt2	2.18562	ENSMUSG00000028121	Bcar3	5.9035	ENSMUSG00000031004	Mki67	3.0448	ENSMUSG00000041313	Slc7a1	3.13292				ENSMUSG00000031870	Pgr	3.03125	ENSMUSG00000030787	Lyve1	5.21301
ENSMUSG00000018425	Dhx40	3.10114	ENSMUSG00000021255	Esrrb	3.66066	ENSMUSG00000028128	F3	8.6639	ENSMUSG00000031722	Hp	13.0431	ENSMUSG00000041605	5730559C18Rik	2.1353				ENSMUSG00000032218	Ccnb2	2.549	ENSMUSG00000031278	Acsl4	2.30407
ENSMUSG00000018581	Dnah11	9.41706	ENSMUSG00000021367	Edn1	4.21208	ENSMUSG00000028247	Coq3	2.14522	ENSMUSG00000031870	Pgr	4.05955	ENSMUSG00000044626	Liph	2.91465				ENSMUSG00000032289	Thsd4	2.82535	ENSMUSG00000031340	Gabre	2.2296
ENSMUSG00000018882	Mrpl45	2.27212	ENSMUSG00000021368	Tbc1d7	2.86815	ENSMUSG00000028255	Clca1	24.0716	ENSMUSG00000032470	Mras	2.0722	ENSMUSG00000045027	Prss22	2.09518				ENSMUSG00000032514	Ttc21a	2.88644	ENSMUSG00000031551	Ido1	5.95342
ENSMUSG00000018906	P4ha2	4.40694	ENSMUSG00000021509	Slc25a48	8.39109	ENSMUSG00000028347	Tmeff1	5.39642	ENSMUSG00000032690	Oas2	2.7629	ENSMUSG00000046096	BC030336	2.21191				ENSMUSG00000032724	Abtb2	2.28356	ENSMUSG00000032020	Ubash3b	3.57718
ENSMUSG00000018924	Alox15	79.3556	ENSMUSG00000021639	Gtf2h2	3.52333	ENSMUSG00000028542	Slc6a9	2.16951	ENSMUSG00000033031	C330027C09Rik	2.11398	ENSMUSG00000046223	Plaur	3.14679				ENSMUSG00000033032	Afap1l1	2.27673	ENSMUSG00000032125	Robo4	3.71026
ENSMUSG00000019102	Aldh3a1	6.36063	ENSMUSG00000021696	Elovl7	3.26373	ENSMUSG00000028654	Mycl	11.4612	ENSMUSG00000033355	Rtp4	3.61393	ENSMUSG00000050359	Sprr1a	2.34797				ENSMUSG00000033268	Duox1	2.71717	ENSMUSG00000032487	Ptgs2	2.1423
ENSMUSG00000019139	Isyna1	6.46424	ENSMUSG00000021785	Ngly1	2.53093	ENSMUSG00000028655	Mfsd2a	3.22203	ENSMUSG00000033684	Qsox1	2.291	ENSMUSG00000051022	Hs3st1	2.53586				ENSMUSG00000033355	Rtp4	2.1548	ENSMUSG00000032735	Ablim3	3.08369
ENSMUSG00000019359	Gdpd2	8.16062	ENSMUSG00000021815	Mss51	3.67808	ENSMUSG00000028927	Padi2	6.12516	ENSMUSG00000033952	Aspm	2.3731	ENSMUSG00000052144	Ppp4r2	2.21893				ENSMUSG00000033987	Dnah17	2.2015	ENSMUSG00000033107	Rnf125	2.27134
ENSMUSG00000019831	Wasf1	2.6443	ENSMUSG00000021822	Plau	8.51591	ENSMUSG00000029335	Bmp3	12.6249	ENSMUSG00000034311	Kif4	2.42015	ENSMUSG00000056054	S100a8	4.60199				ENSMUSG00000034459	Ifit1	3.27288	ENSMUSG00000033174	Mgll	2.21961
ENSMUSG00000019832	Rab32	2.28439	ENSMUSG00000021843	Ktn1	2.27547	ENSMUSG00000029375	Cxcl15	68.62	ENSMUSG00000034459	Ifit1	4.92242	ENSMUSG00000058427	Cxcl2	3.67889				ENSMUSG00000034855	Cxcl10	2.86849	ENSMUSG00000033788	Dysf	2.33544
ENSMUSG00000019851	Perp	6.99413	ENSMUSG00000021874	4933413J09Rik	2.49088	ENSMUSG00000029378	Areg	16.39	ENSMUSG00000034855	Cxcl10	3.48056	ENSMUSG00000059751	Rps3a3	12.0887				ENSMUSG00000034926	Dhcr24	3.60354	ENSMUSG00000033949	Trim36	2.42927
ENSMUSG00000019942	Cdk1	5.96843	ENSMUSG00000021879	Dnah12	3.91631	ENSMUSG00000029414	Kntc1	4.70712	ENSMUSG00000035020	Epgn	7.90961	ENSMUSG00000060950	Trmt61a	2.53624				ENSMUSG00000035020	Epgn	28.9621	ENSMUSG00000034394	Lif	6.12487
ENSMUSG00000019987	Arg1	3.35602	ENSMUSG00000021994	Wnt5a	3.09535	ENSMUSG00000029545	Acads	2.72609	ENSMUSG00000035683	Melk	3.37581	ENSMUSG00000060962	Dmkn	2.51814				ENSMUSG00000035208	Slfn8	2.07411	ENSMUSG00000034687	Fras1	3.3976
ENSMUSG00000019992	Mtfr2	2.63325	ENSMUSG00000022021	Diaph3	3.67611	ENSMUSG00000029811	Aoc1	156.856	ENSMUSG00000036523	Greb1	9.95508	ENSMUSG00000061802	Armc4	7.75374				ENSMUSG00000035275	Raver2	2.60784	ENSMUSG00000034825	Nrip3	3.97783
ENSMUSG00000020023	Tmcc3	3.38936	ENSMUSG00000022353	Mtss1	2.19873	ENSMUSG00000029910	Mad2l1	8.18132	ENSMUSG00000036768	Kif15	2.50255	ENSMUSG00000062169	Cnih4	2.14588				ENSMUSG00000035459	Stab2	3.82661	ENSMUSG00000034911	Ushbp1	3.64138
ENSMUSG00000020027	Socs2	4.30389	ENSMUSG00000022358	Fbxo32	2.36103	ENSMUSG00000030107	Usp18	5.53656	ENSMUSG00000036777	Anln	2.54341	ENSMUSG00000062611	Rps3a2	3.65232				ENSMUSG00000035566	Pcdh17	2.92642	ENSMUSG00000035020	Epgn	5.47019
ENSMUSG00000020032	Nuak1	4.51652	ENSMUSG00000022508	Bcl6	2.82329	ENSMUSG00000030317	Timp4	5.34441	ENSMUSG00000038311	2410017I17Rik	2.93737	ENSMUSG00000062991	Nrg1	3.28766				ENSMUSG00000035692	Isg15	2.50702	ENSMUSG00000035021	Baz1a	3.04514
ENSMUSG00000020062	Slc5a8	10.3472	ENSMUSG00000022533	Atp13a3	6.23464	ENSMUSG00000030792	Dkkl1	3.59596	ENSMUSG00000038567	Cyp24a1	10.7422	ENSMUSG00000063305	Psg20	5.59586				ENSMUSG00000036136	Fam110c	2.87799	ENSMUSG00000035329	Fbxo33	2.1972
ENSMUSG00000020099	Unc5b	5.8214	ENSMUSG00000022591	Gm9747	2.24954	ENSMUSG00000030854	Ptpn5	82.9448	ENSMUSG00000040084	Bub1b	2.48292	ENSMUSG00000066735	Vkorc1l1	2.05873				ENSMUSG00000036466	Megf11	2.55874	ENSMUSG00000035566	Pcdh17	2.87112
ENSMUSG00000020142	Slc1a4	2.57237	ENSMUSG00000022661	Cd200	2.45347	ENSMUSG00000031098	Syt8	5.4274	ENSMUSG00000040204	2810417H13Rik	3.13734	ENSMUSG00000067219	Nipal1	3.04831				ENSMUSG00000036523	Greb1	16.278	ENSMUSG00000036553	Sh3tc1	2.93
ENSMUSG00000020159	Gabrp	12.01	ENSMUSG00000022801	Lrch3	2.01047	ENSMUSG00000031169	Porcn	4.48802	ENSMUSG00000040548	Tex2	2.11383	ENSMUSG00000071537	Klrg2	2.42721				ENSMUSG00000037544	Dlgap5	2.46095	ENSMUSG00000036931	Nfkbid	2.26959
ENSMUSG00000020267	Hint1	2.24003	ENSMUSG00000022824	Muc13	10.9072	ENSMUSG00000031179	3830417A13Rik	12.8253	ENSMUSG00000041147	Brca2	2.08623	ENSMUSG00000074221	Zfp568	2.90409				ENSMUSG00000037580	Gch1	2.36762	ENSMUSG00000037126	Psd	2.85698
ENSMUSG00000020303	Stc2	5.28705	ENSMUSG00000022849	Hspbap1	2.64345	ENSMUSG00000031221	Igbp1	2.90946	ENSMUSG00000041431	Ccnb1	2.36841	ENSMUSG00000074796	Slc4a11	3.29867				ENSMUSG00000037681	Esyt3	2.59775	ENSMUSG00000037580	Gch1	3.25124
ENSMUSG00000020326	Ccng1	2.60304	ENSMUSG00000022863	Btg3	3.39422	ENSMUSG00000031400	G6pdx	3.60185	ENSMUSG00000041859	Mcm3	2.77786	ENSMUSG00000074802	Gas2l3	3.10211				ENSMUSG00000038020	Rapgefl1	2.30632	ENSMUSG00000038067	Csf3	5.48931
ENSMUSG00000020328	Nudcd2	4.12402	ENSMUSG00000022865	Cxadr	2.28307	ENSMUSG00000031431	Tsc22d3	3.61108	ENSMUSG00000042489	Clspn	2.81137	ENSMUSG00000078956	Gm14221	3.88291				ENSMUSG00000038295	Atg9b	5.31989	ENSMUSG00000038311	2410017I17Rik	3.55707
ENSMUSG00000020330	Hmmr	9.59351	ENSMUSG00000022938	Fam3b	4.70023	ENSMUSG00000031490	Eif4ebp1	3.47102	ENSMUSG00000042834	Nrep	3.38119	ENSMUSG00000079043	Fastkd5	2.43052				ENSMUSG00000038311	2410017I17Rik	2.96559	ENSMUSG00000039109	F13a1	5.26167
ENSMUSG00000020386	Sar1b	2.30416	ENSMUSG00000022995	Enah	2.03652	ENSMUSG00000031519	Asb5	2.14326	ENSMUSG00000044405	Adig	5.07803	ENSMUSG00000090207	4930524O07Rik	2.37674				ENSMUSG00000038415	Foxq1	3.42328	ENSMUSG00000039167	Adgrl4	2.93328
ENSMUSG00000020388	Pdlim4	2.29243	ENSMUSG00000023011	Faim2	9.21112	ENSMUSG00000031551	Ido1	58.0506	ENSMUSG00000044934	Zfp367	2.42414	ENSMUSG00000092686	Gm25745	2.10171				ENSMUSG00000038567	Cyp24a1	5.9871	ENSMUSG00000039813	Tbc1d2	2.45708
ENSMUSG00000020415	Pttg1	3.07115	ENSMUSG00000023041	Krt6b	4.28724	ENSMUSG00000031722	Hp	7.94257	ENSMUSG00000045328	Cenpe	2.6977	ENSMUSG00000097412	1810014B01Rik	2.18733				ENSMUSG00000039323	Igfbp2	3.90454	ENSMUSG00000040010	Slc7a5	3.18268
ENSMUSG00000020451	Limk2	2.47251	ENSMUSG00000023328	Ache	2.87106	ENSMUSG00000031766	Slc12a3	12.6445	ENSMUSG00000045573	Penk	4.14611	ENSMUSG00000101014	Gm28289	2.75149				ENSMUSG00000040010	Slc7a5	3.01919	ENSMUSG00000040046	Tph1	4.43462
ENSMUSG00000020493	Prr11	2.8829	ENSMUSG00000023903	Mmp25	4.8575	ENSMUSG00000031870	Pgr	14.0263	ENSMUSG00000046718	Bst2	2.62404	ENSMUSG00000101859	Gm29233	4.42918				ENSMUSG00000040033	Stat2	2.40232	ENSMUSG00000040283	Btnl9	6.40737
ENSMUSG00000020590	Snx13	3.59222	ENSMUSG00000024039	Cbs	2.20139	ENSMUSG00000031898	Dpep3	11.2479	ENSMUSG00000047534	Mis18bp1	2.43365	ENSMUSG00000105875	Gm43518	2.54361				ENSMUSG00000040046	Tph1	17.8241	ENSMUSG00000040528	Milr1	2.91231
ENSMUSG00000020592	Sdc1	2.87988	ENSMUSG00000024242	Map4k3	2.08856	ENSMUSG00000031901	Dus2	10.8688	ENSMUSG00000049100	Pcdh10	2.69734	ENSMUSG00000106121	Gm42679	5.7325				ENSMUSG00000040528	Milr1	3.16605	ENSMUSG00000040663	Clcf1	3.52533
ENSMUSG00000020638	Cmpk2	3.47185	ENSMUSG00000024331	Dsc2	3.94446	ENSMUSG00000032046	Abhd12	2.91788	ENSMUSG00000049539	Hist1h1a	3.021	ENSMUSG00000107134	Gm42528	4.03415				ENSMUSG00000041831	Sytl3	2.40281	ENSMUSG00000040710	St8sia4	4.1818
ENSMUSG00000020641	Rsad2	7.53291	ENSMUSG00000024339	Tap2	3.59843	ENSMUSG00000032108	D730048I06Rik	45.2087	ENSMUSG00000050463	Krt78	2.6559	ENSMUSG00000110790	RP23-110E20.5	3.14224				ENSMUSG00000042306	S100a14	4.54294	ENSMUSG00000040751	Lat2	2.73116
ENSMUSG00000020646	Mboat2	3.76025	ENSMUSG00000024354	Slc23a1	3.01325	ENSMUSG00000032313	Tmem266	8.47849	ENSMUSG00000050730	Arhgap42	2.87082							ENSMUSG00000042417	Ccno	2.45472	ENSMUSG00000041046	Ramp3	2.00938
ENSMUSG00000020649	Rrm2	8.49924	ENSMUSG00000024401	Tnf	2.85662	ENSMUSG00000032353	Tmed3	9.53593	ENSMUSG00000051081	Gm4847	15.4898							ENSMUSG00000042751	Nmnat2	3.7886	ENSMUSG00000041134	Cyyr1	4.09055
ENSMUSG00000020715	Ern1	8.02758	ENSMUSG00000024424	Ttc39c	2.88992	ENSMUSG00000032412	Atp1b3	3.81954	ENSMUSG00000051220	Ercc6l	2.08478							ENSMUSG00000042828	Trim72	3.13563	ENSMUSG00000041378	Cldn5	4.15802
ENSMUSG00000020758	Itgb4	2.5872	ENSMUSG00000024521	Pmaip1	2.94421	ENSMUSG00000032470	Mras	4.08364	ENSMUSG00000052013	Btla	4.02743							ENSMUSG00000043541	Casc1	2.73646	ENSMUSG00000041827	Oasl1	11.0752
ENSMUSG00000020774	Aspa	27.7875	ENSMUSG00000024530	Slmo1	3.78279	ENSMUSG00000032715	Trib3	3.31737	ENSMUSG00000052033	Pfdn4	2.49631							ENSMUSG00000043782	Ccdc64b	2.29205	ENSMUSG00000042286	Stab1	3.41231
ENSMUSG00000020788	Atp2a3	9.42896	ENSMUSG00000024542	Cep192	3.16059	ENSMUSG00000032725	Folr2	4.20704	ENSMUSG00000052776	Oas1a	2.95982							ENSMUSG00000044162	Tnip3	3.24595	ENSMUSG00000042745	Id1	3.01949
ENSMUSG00000020911	Krt19	2.86292	ENSMUSG00000024589	Nedd4l	2.4511	ENSMUSG00000033316	Galnt9	15.342	ENSMUSG00000053797	Krt16	3.29832							ENSMUSG00000045349	Sh2d5	3.12704	ENSMUSG00000042828	Trim72	3.23625
ENSMUSG00000020914	Top2a	9.78153	ENSMUSG00000024597	Slc12a2	2.46164	ENSMUSG00000034311	Kif4	4.3864	ENSMUSG00000054728	Phactr1	2.1615							ENSMUSG00000045502	Hcar2	4.14328	ENSMUSG00000043782	Ccdc64b	2.15294
ENSMUSG00000021065	Fut8	2.59749	ENSMUSG00000024669	Cd5	2.66703	ENSMUSG00000034912	Mdga2	11.4663	ENSMUSG00000058354	Krt6a	6.87155							ENSMUSG00000045573	Penk	5.10787	ENSMUSG00000044037	Als2cl	2.43796
ENSMUSG00000021175	Cdca7l	2.68116	ENSMUSG00000024810	Il33	3.14069	ENSMUSG00000034926	Dhcr24	3.30083	ENSMUSG00000059668	Krt4	6.95693							ENSMUSG00000045730	Adrb2	2.36993	ENSMUSG00000044162	Tnip3	7.27108
ENSMUSG00000021223	Papln	5.56984	ENSMUSG00000024892	Pcx	9.57976	ENSMUSG00000035020	Epgn	27.792	ENSMUSG00000061615	Hist1h2ab	3.10278							ENSMUSG00000046598	Bdh1	2.01897	ENSMUSG00000044258	Ctla2a	2.26322
ENSMUSG00000021253	Tgfb3	3.44842	ENSMUSG00000025105	Bnc1	4.80412	ENSMUSG00000036046	5031439G07Rik	2.96376	ENSMUSG00000061937	Csn1s2a	24.9301							ENSMUSG00000046623	Gjb4	3.69522	ENSMUSG00000045349	Sh2d5	3.92318
ENSMUSG00000021255	Esrrb	20.022	ENSMUSG00000025185	Loxl4	2.3332	ENSMUSG00000036053	Fmnl2	5.95464	ENSMUSG00000061991	Hist1h2af	2.70117							ENSMUSG00000046733	Gprc5a	2.15722	ENSMUSG00000045730	Adrb2	2.37347
ENSMUSG00000021356	Irf4	15.1472	ENSMUSG00000025209	Twnk	4.97684	ENSMUSG00000036155	Mgat5	3.33377	ENSMUSG00000062098	Btbd3	2.82461							ENSMUSG00000046879	Irgm1	2.04699	ENSMUSG00000046623	Gjb4	3.13434
ENSMUSG00000021367	Edn1	4.72957	ENSMUSG00000025279	Dnase1l3	4.91133	ENSMUSG00000036402	Gng12	3.19505	ENSMUSG00000062488	Ifit3b	5.83439							ENSMUSG00000050359	Sprr1a	4.53726	ENSMUSG00000046733	Gprc5a	2.37388
ENSMUSG00000021368	Tbc1d7	2.55576	ENSMUSG00000025287	Acot9	2.47554	ENSMUSG00000036523	Greb1	87.8813	ENSMUSG00000063157	Csn2	14.4526							ENSMUSG00000051081	Gm4847	16.3865	ENSMUSG00000047180	Neurl3	3.76999
ENSMUSG00000021639	Gtf2h2	2.35198	ENSMUSG00000025357	Dgka	2.09055	ENSMUSG00000036745	Ttll7	5.88456	ENSMUSG00000064032	Gm10143	2.42381							ENSMUSG00000054146	Krt15	6.34484	ENSMUSG00000047867	Gimap6	2.55136
ENSMUSG00000021728	Emb	5.07042	ENSMUSG00000025372	Baiap2	2.19195	ENSMUSG00000036768	Kif15	3.91225	ENSMUSG00000067219	Nipal1	3.58393							ENSMUSG00000054537	Tmprss11e	10.9863	ENSMUSG00000048234	Rnf149	2.3413
ENSMUSG00000021785	Ngly1	2.07735	ENSMUSG00000025529	Zfp711	2.94772	ENSMUSG00000036777	Anln	6.15762	ENSMUSG00000068587	Mgam	2.76434							ENSMUSG00000054728	Phactr1	3.17043	ENSMUSG00000048621	Gm6377	3.62219
ENSMUSG00000021795	Sftpd	12.1788	ENSMUSG00000025608	Podxl	4.34418	ENSMUSG00000037820	Tgm2	3.68307	ENSMUSG00000069793	Slfn9	2.62937							ENSMUSG00000056632	Dsg3	7.49	ENSMUSG00000048636	A730049H05Rik	3.31933
ENSMUSG00000021822	Plau	9.17416	ENSMUSG00000025757	Hspa4l	2.4594	ENSMUSG00000038295	Atg9b	5.78287	ENSMUSG00000070867	Trabd2b	3.77965							ENSMUSG00000058354	Krt6a	18.0277	ENSMUSG00000050359	Sprr1a	3.20947
ENSMUSG00000021831	Ero1l	2.60031	ENSMUSG00000025808	Ccdc7a	3.90551	ENSMUSG00000038415	Foxq1	7.41081	ENSMUSG00000072845	Tmprss11a	15.219							ENSMUSG00000059668	Krt4	38.597	ENSMUSG00000053024	Cntn2	4.59944
ENSMUSG00000021950	Anxa8	2.45333	ENSMUSG00000025907	Rb1cc1	2.44715	ENSMUSG00000038665	Dgki	14.1534	ENSMUSG00000074813	Gm14005	2.71411							ENSMUSG00000059991	Nptx2	3.13138	ENSMUSG00000054146	Krt15	4.96585
ENSMUSG00000021994	Wnt5a	6.03659	ENSMUSG00000025921	Rdh10	4.76845	ENSMUSG00000038893	Fam117a	3.48665	ENSMUSG00000074896	Ifit3	6.5339							ENSMUSG00000061937	Csn1s2a	46.0081	ENSMUSG00000054641	Mmrn1	8.07203
ENSMUSG00000022021	Diaph3	6.55431	ENSMUSG00000026068	Il18rap	8.24907	ENSMUSG00000039954	Stk32a	6.05504	ENSMUSG00000076431	Sox4	2.40582							ENSMUSG00000062991	Nrg1	2.88339	ENSMUSG00000055323	Gm9967	2.21559
ENSMUSG00000022033	Pbk	8.52231	ENSMUSG00000026070	Il18r1	4.70266	ENSMUSG00000040010	Slc7a5	4.75499	ENSMUSG00000076434	Wfdc3	2.2348							ENSMUSG00000063157	Csn2	37.9161	ENSMUSG00000055994	Nod2	3.32733
ENSMUSG00000022034	Esco2	4.55344	ENSMUSG00000026107	Nabp1	2.8323	ENSMUSG00000040046	Tph1	34.4771	ENSMUSG00000078117	Gm16485	3.33167							ENSMUSG00000064369	mt-Te	3.50157	ENSMUSG00000056492	Adgrf5	2.4027
ENSMUSG00000022322	Shcbp1	3.65893	ENSMUSG00000026322	Htr4	4.1378	ENSMUSG00000040158	Tax1bp3	2.89213	ENSMUSG00000078853	Igtp	2.3951							ENSMUSG00000064372	mt-Tp	2.14664	ENSMUSG00000058427	Cxcl2	5.32292
ENSMUSG00000022332	Khdrbs3	8.10679	ENSMUSG00000026343	Gpr39	9.98254	ENSMUSG00000040594	Ranbp17	2.14696	ENSMUSG00000079017	Ifi27l2a	2.97263							ENSMUSG00000064797	Gm24357	2.85103	ENSMUSG00000059751	Rps3a3	11.5627
ENSMUSG00000022353	Mtss1	2.8934	ENSMUSG00000026344	Lypd1	7.68068	ENSMUSG00000041538	H2-Ob	5.51451	ENSMUSG00000079362	Gm43302	2.72863							ENSMUSG00000066647	Gm5113	2.24155	ENSMUSG00000060470	Adgrg3	2.29938
ENSMUSG00000022360	Atad2	2.85706	ENSMUSG00000026347	Tmem163	5.41969	ENSMUSG00000041605	5730559C18Rik	4.31913	ENSMUSG00000086514	Gm11747	2.14719							ENSMUSG00000067219	Nipal1	5.67321	ENSMUSG00000060586	H2-Eb1	9.1455
ENSMUSG00000022510	Trp63	5.94044	ENSMUSG00000026473	Glul	3.86376	ENSMUSG00000041762	Gpr155	3.85121	ENSMUSG00000097461	Gm26735	2.46658							ENSMUSG00000070327	Rnf213	2.25142	ENSMUSG00000061100	Retnla	5.0787
ENSMUSG00000022533	Atp13a3	7.54782	ENSMUSG00000026479	Lamc2	4.95305	ENSMUSG00000042225	Ammecr1	2.82083	ENSMUSG00000102299	Gm37539	2.58339							ENSMUSG00000070385	Ampd1	4.68289	ENSMUSG00000062515	Fabp4	3.03617
ENSMUSG00000022591	Gm9747	4.99899	ENSMUSG00000026655	Fam107b	3.24668	ENSMUSG00000042303	Sgsm3	2.7132	ENSMUSG00000105954	Gm42793	2.47403							ENSMUSG00000071342	Lsmem1	2.8032	ENSMUSG00000062593	Lilrb4a	8.62574
ENSMUSG00000022661	Cd200	2.85895	ENSMUSG00000026669	Mcm10	2.9409	ENSMUSG00000042306	S100a14	9.5043										ENSMUSG00000072845	Tmprss11a	22.6214	ENSMUSG00000062611	Rps3a2	3.24518
ENSMUSG00000022761	Lztr1	2.08953	ENSMUSG00000026709	Dars2	2.12506	ENSMUSG00000042410	Agps	5.84871										ENSMUSG00000073403	Gm10499	3.09252	ENSMUSG00000062960	Kdr	3.48686
ENSMUSG00000022797	Tfrc	2.85294	ENSMUSG00000026715	Serpinc1	2.53262	ENSMUSG00000042428	Mgat3	5.83053										ENSMUSG00000074151	Nlrc5	2.83754	ENSMUSG00000063889	Crem	3.02859
ENSMUSG00000022824	Muc13	8.75316	ENSMUSG00000026764	Kif5c	5.54623	ENSMUSG00000042751	Nmnat2	15.7282										ENSMUSG00000074625	Arhgap40	2.55446	ENSMUSG00000067219	Nipal1	2.20321
ENSMUSG00000022995	Enah	2.56315	ENSMUSG00000026767	Fam188a	2.59352	ENSMUSG00000043639	Rbm20	9.48701										ENSMUSG00000074796	Slc4a11	4.22956	ENSMUSG00000071042	Rasgrp3	2.60856
ENSMUSG00000023011	Faim2	43.9146	ENSMUSG00000026950	Neb	3.46256	ENSMUSG00000044217	Aqp5	5.71511										ENSMUSG00000074813	Gm14005	2.82212	ENSMUSG00000071713	Csf2rb	3.54855
ENSMUSG00000023015	Racgap1	9.43125	ENSMUSG00000026971	Itgb6	6.59792	ENSMUSG00000044359	P2ry4	23.1152										ENSMUSG00000074899	Sptbn5	5.03899	ENSMUSG00000072082	Ccnf	3.09512
ENSMUSG00000023041	Krt6b	10.0434	ENSMUSG00000027035	Cers6	2.94911	ENSMUSG00000044748	Defb1	16.5262										ENSMUSG00000078117	Gm16485	3.5592	ENSMUSG00000072437	Nanos1	2.59966
ENSMUSG00000023094	Msrb2	3.23782	ENSMUSG00000027087	Itgav	2.66323	ENSMUSG00000045502	Hcar2	3.45754										ENSMUSG00000079138	Gm8818	3.78041	ENSMUSG00000073403	Gm10499	3.70703
ENSMUSG00000023505	Cdca3	7.62763	ENSMUSG00000027134	Lpcat4	3.05781	ENSMUSG00000045538	Ddx28	6.81513										ENSMUSG00000079462	Gm15737	2.71904	ENSMUSG00000074796	Slc4a11	3.40015
ENSMUSG00000024056	Ndc80	5.26645	ENSMUSG00000027333	Smox	2.33349	ENSMUSG00000045730	Adrb2	4.5076										ENSMUSG00000084128	Esrp2	2.13683	ENSMUSG00000074899	Sptbn5	3.0377
ENSMUSG00000024067	Dpy30	2.2029	ENSMUSG00000027356	Fermt1	17.0102	ENSMUSG00000045838	A430105I19Rik	2.49802										ENSMUSG00000085023	Gm12744	2.56357	ENSMUSG00000079462	Gm15737	3.4375
ENSMUSG00000024070	Prkd3	2.25835	ENSMUSG00000027375	Mal	7.36839	ENSMUSG00000046070	Igfals	3.50281										ENSMUSG00000085894	Gm15832	2.26595	ENSMUSG00000085894	Gm15832	2.55505
ENSMUSG00000024211	Grm8	5.96952	ENSMUSG00000027376	Prom2	3.77149	ENSMUSG00000046500	Fam19a4	10.1913										ENSMUSG00000087528	9830144P21Rik	3.04347	ENSMUSG00000085925	Rtl1	3.74545
ENSMUSG00000024331	Dsc2	4.0266	ENSMUSG00000027456	Sdcbp2	3.38518	ENSMUSG00000046562	Unc119b	2.92546										ENSMUSG00000089809	A930011G23Rik	2.28479	ENSMUSG00000086331	Gm16310	2.90885
ENSMUSG00000024339	Tap2	2.46876	ENSMUSG00000027651	Rprd1b	3.17904	ENSMUSG00000046718	Bst2	2.81917										ENSMUSG00000089952	4933413C19Rik	2.88726	ENSMUSG00000087528	9830144P21Rik	3.41415
ENSMUSG00000024424	Ttc39c	5.16781	ENSMUSG00000027699	Ect2	2.19555	ENSMUSG00000047139	Cd24a	4.50721										ENSMUSG00000090223	Pcp4	5.32878	ENSMUSG00000087530	Gm15533	2.83646
ENSMUSG00000024430	Cabyr	3.72871	ENSMUSG00000027859	Ngf	11.5334	ENSMUSG00000047517	Dmbt1	38.9936										ENSMUSG00000097125	Gm26885	2.23549	ENSMUSG00000092203	1110038B12Rik	2.12497
ENSMUSG00000024521	Pmaip1	7.20305	ENSMUSG00000027947	Il6ra	2.92814	ENSMUSG00000048022	Tmem229a	8.43132										ENSMUSG00000097266	Gm26802	2.74433	ENSMUSG00000092274	Neat1	4.39897
ENSMUSG00000024534	Sncaip	6.4079	ENSMUSG00000027983	Cyp2u1	5.82133	ENSMUSG00000048482	Bdnf	5.4074										ENSMUSG00000098488	Pla2g4b	2.43816	ENSMUSG00000097751	Gm26690	2.64806
ENSMUSG00000024640	Psat1	4.23044	ENSMUSG00000028082	Sh3d19	3.38302	ENSMUSG00000048578	Mlec	3.37482										ENSMUSG00000103024	Gm37685	2.68921	ENSMUSG00000098543	Gm27533	3.36545
ENSMUSG00000024660	Incenp	3.48095	ENSMUSG00000028085	Gatb	4.92801	ENSMUSG00000048644	Ctxn1	2.56725										ENSMUSG00000103304	Gm5979	2.94864	ENSMUSG00000098974	Gm27505	3.40829
ENSMUSG00000024742	Fen1	2.12348	ENSMUSG00000028115	Bnipl	2.12627	ENSMUSG00000048764	Tmprss11f	10.638										ENSMUSG00000106088	Gm44342	12.1608	ENSMUSG00000098986	Gm28006	3.13705
ENSMUSG00000024795	Kif20b	2.69156	ENSMUSG00000028121	Bcar3	6.41371	ENSMUSG00000049128	Ivl	14.6508										ENSMUSG00000106870	Gm43681	2.533	ENSMUSG00000103009	Gm4430	2.35714
ENSMUSG00000024810	Il33	10.1268	ENSMUSG00000028125	Abca4	4.5667	ENSMUSG00000049539	Hist1h1a	3.18863										ENSMUSG00000108218	Olfr1372-ps1	2.07394	ENSMUSG00000103313	Gm38357	3.56149
ENSMUSG00000024892	Pcx	12.8146	ENSMUSG00000028128	F3	6.88981	ENSMUSG00000049892	Rasd1	4.71321										ENSMUSG00000108524	Gm44876	2.9181	ENSMUSG00000104503	Gm37738	2.72527
ENSMUSG00000024922	Ovol1	2.46577	ENSMUSG00000028161	Ppp3ca	2.85387	ENSMUSG00000050108	Bpifc	15.0132										ENSMUSG00000109408	Gm44935	2.6454	ENSMUSG00000106870	Gm43681	2.98102
ENSMUSG00000024989	Cep55	6.4097	ENSMUSG00000028164	Manba	2.1599	ENSMUSG00000050359	Sprr1a	5.11316										ENSMUSG00000110622	KIAA1683	3.19953	ENSMUSG00000108524	Gm44876	2.56978
ENSMUSG00000025001	Hells	5.19507	ENSMUSG00000028184	Adgrl2	2.02462	ENSMUSG00000050463	Krt78	18.0579
ENSMUSG00000025064	Col17a1	4.1094	ENSMUSG00000028188	Spata1	4.02887	ENSMUSG00000050635	Sprr2f	36.8242
ENSMUSG00000025068	Gsto1	4.91946	ENSMUSG00000028189	Ctbs	2.4092	ENSMUSG00000051000	Fam160a1	3.74675
ENSMUSG00000025089	Gfra1	10.8843	ENSMUSG00000028211	Trp53inp1	3.59332	ENSMUSG00000051081	Gm4847	278.593
ENSMUSG00000025105	Bnc1	16.5472	ENSMUSG00000028247	Coq3	2.40572	ENSMUSG00000051223	Bzw1	3.38475
ENSMUSG00000025130	P4hb	2.26483	ENSMUSG00000028255	Clca1	12.8496	ENSMUSG00000051726	Kcnf1	13.48
ENSMUSG00000025150	Cbr2	4.81785	ENSMUSG00000028289	Epha7	5.38965	ENSMUSG00000052397	Ezr	7.27332
ENSMUSG00000025154	Arhgap19	2.52408	ENSMUSG00000028300	3110043O21Rik	2.91012	ENSMUSG00000053522	Lgals7	7.87998
ENSMUSG00000025203	Scd2	3.49339	ENSMUSG00000028347	Tmeff1	4.78446	ENSMUSG00000053687	Dpep2	23.5211
ENSMUSG00000025208	Mrpl43	2.58192	ENSMUSG00000028403	Zdhhc21	2.50234	ENSMUSG00000053797	Krt16	18.0339
ENSMUSG00000025209	Twnk	7.8206	ENSMUSG00000028435	Aqp3	6.91033	ENSMUSG00000054161	Fam83e	6.81523
ENSMUSG00000025328	Padi3	14.6441	ENSMUSG00000028654	Mycl	2.96268	ENSMUSG00000054408	Spcs3	2.3044
ENSMUSG00000025330	Padi4	5.51645	ENSMUSG00000028655	Mfsd2a	2.8103	ENSMUSG00000054453	Sytl5	2.94462
ENSMUSG00000025357	Dgka	2.53473	ENSMUSG00000028672	Hmgcl	2.34373	ENSMUSG00000054537	Tmprss11e	33.1673
ENSMUSG00000025395	Prim1	2.42954	ENSMUSG00000028719	Cmpk1	2.39571	ENSMUSG00000054619	Mettl7a1	2.60486
ENSMUSG00000025586	Cpeb1	3.24618	ENSMUSG00000028794	A3galt2	3.24301	ENSMUSG00000054728	Phactr1	16.8498
ENSMUSG00000025608	Podxl	5.67171	ENSMUSG00000028927	Padi2	5.45318	ENSMUSG00000055301	Adh7	8.97008
ENSMUSG00000025650	Col7a1	3.47271	ENSMUSG00000028961	Pgd	2.286	ENSMUSG00000055679	Ctsr	9.53389
ENSMUSG00000025747	Tyms	2.37668	ENSMUSG00000029086	Prom1	2.66725	ENSMUSG00000056222	Spock1	6.40353
ENSMUSG00000025817	Nudt5	2.17115	ENSMUSG00000029174	Tbc1d1	2.53167	ENSMUSG00000056608	Chd9	2.11205
ENSMUSG00000025854	Fam20c	3.23499	ENSMUSG00000029178	Klf3	2.58748	ENSMUSG00000057378	Ryr3	20.8802
ENSMUSG00000026000	Lancl1	2.9524	ENSMUSG00000029205	Chrna9	9.25956	ENSMUSG00000057409	Zfp53	2.89102
ENSMUSG00000026039	Sgol2a	2.45866	ENSMUSG00000029217	Tec	2.33182	ENSMUSG00000058152	Chsy3	9.96997
ENSMUSG00000026073	Il1r2	10.3929	ENSMUSG00000029322	Plac8	3.14526	ENSMUSG00000058385	Hist1h2bg	2.71529
ENSMUSG00000026095	Asnsd1	2.58718	ENSMUSG00000029335	Bmp3	6.5457	ENSMUSG00000058498	Rnf207	3.50215
ENSMUSG00000026196	Bard1	3.07637	ENSMUSG00000029375	Cxcl15	26.2322	ENSMUSG00000058704	Memo1	4.84025
ENSMUSG00000026343	Gpr39	8.18958	ENSMUSG00000029378	Areg	24.5663	ENSMUSG00000058773	Hist1h1b	3.11609
ENSMUSG00000026344	Lypd1	5.61129	ENSMUSG00000029385	Ccng2	3.72097	ENSMUSG00000059668	Krt4	41.7186
ENSMUSG00000026347	Tmem163	4.14526	ENSMUSG00000029403	Cdkl2	2.13953	ENSMUSG00000060402	Chst8	8.6753
ENSMUSG00000026360	Rgs2	6.02241	ENSMUSG00000029414	Kntc1	6.18582	ENSMUSG00000061397	Krt79	8.15983
ENSMUSG00000026411	Tmem9	2.31369	ENSMUSG00000029484	Anxa3	6.1662	ENSMUSG00000063021	Hist1h2ak	2.51223
ENSMUSG00000026473	Glul	3.52539	ENSMUSG00000029811	Aoc1	117.139	ENSMUSG00000067594	Krt77	109.925
ENSMUSG00000026479	Lamc2	5.42237	ENSMUSG00000029821	Dfna5	3.06993	ENSMUSG00000068735	Trp53i11	2.54797
ENSMUSG00000026535	Ifi202b	3.5473	ENSMUSG00000029910	Mad2l1	11.7523	ENSMUSG00000069255	Dusp22	2.00774
ENSMUSG00000026579	F5	2.57095	ENSMUSG00000030095	Tmem43	2.57347	ENSMUSG00000069267	Hist1h3b	3.03645
ENSMUSG00000026600	Soat1	8.87993	ENSMUSG00000030107	Usp18	2.65357	ENSMUSG00000069310	Hist1h3c	3.55671
ENSMUSG00000026601	Axdnd1	6.46554	ENSMUSG00000030168	Adipor2	2.05967	ENSMUSG00000070419	Cyp3a57	9.89193
ENSMUSG00000026605	Cenpf	8.97973	ENSMUSG00000030254	Rad18	2.65203	ENSMUSG00000070867	Trabd2b	7.99105
ENSMUSG00000026622	Nek2	6.24372	ENSMUSG00000030269	Mtmr14	2.27965	ENSMUSG00000071516	Hist1h2ai	2.53957
ENSMUSG00000026639	Lamb3	3.56397	ENSMUSG00000030317	Timp4	4.47999	ENSMUSG00000072845	Tmprss11a	99.8089
ENSMUSG00000026669	Mcm10	3.19766	ENSMUSG00000030606	Hapln3	3.60849	ENSMUSG00000073555	Gm4951	3.98126
ENSMUSG00000026683	Nuf2	3.06246	ENSMUSG00000030607	Acan	3.95202	ENSMUSG00000073985	Gm10602	2.3092
ENSMUSG00000026767	Fam188a	2.29742	ENSMUSG00000030616	Sytl2	2.36388	ENSMUSG00000074445	Sprr2a3	33.2327
ENSMUSG00000026779	Mastl	3.75879	ENSMUSG00000030717	Nupr1	3.5197	ENSMUSG00000074813	Gm14005	12.9826
ENSMUSG00000026827	Gpd2	2.72899	ENSMUSG00000030760	Acer3	2.74488	ENSMUSG00000075031	Hist1h2bb	2.67317
ENSMUSG00000026939	Tmem141	2.62988	ENSMUSG00000030792	Dkkl1	3.27185	ENSMUSG00000078117	Gm16485	16.1686
ENSMUSG00000026950	Neb	6.74133	ENSMUSG00000030852	Tacc2	2.22369	ENSMUSG00000079554	Aox2	8.8903
ENSMUSG00000026971	Itgb6	3.17275	ENSMUSG00000030854	Ptpn5	66.5833	ENSMUSG00000082361	Btc	3.02827
ENSMUSG00000026989	Dapl1	6.71925	ENSMUSG00000030986	Dhx32	2.24221	ENSMUSG00000085023	Gm12744	3.50863
ENSMUSG00000027035	Cers6	4.40143	ENSMUSG00000031098	Syt8	4.83246	ENSMUSG00000085276	Gm15812	9.44016
ENSMUSG00000027134	Lpcat4	3.71799	ENSMUSG00000031137	Fgf13	2.16905	ENSMUSG00000085683	9130409J20Rik	12.7053
ENSMUSG00000027203	Dut	2.73637	ENSMUSG00000031155	Pim2	2.21995	ENSMUSG00000087202	Gm15813	7.87873
ENSMUSG00000027273	Snap25	12.4324	ENSMUSG00000031168	Ebp	3.03427	ENSMUSG00000087265	Gm12349	3.78777
ENSMUSG00000027306	Nusap1	5.51766	ENSMUSG00000031169	Porcn	6.71079	ENSMUSG00000087698	Gm13031	5.70282
ENSMUSG00000027326	Knl1	3.75837	ENSMUSG00000031179	3830417A13Rik	8.72455	ENSMUSG00000089710	Gm15810	13.9557
ENSMUSG00000027331	Knstrn	5.72853	ENSMUSG00000031221	Igbp1	2.55236	ENSMUSG00000090223	Pcp4	31.8299
ENSMUSG00000027333	Smox	5.56447	ENSMUSG00000031232	Magt1	2.37668	ENSMUSG00000090863	A530084C06Rik	5.61961
ENSMUSG00000027356	Fermt1	10.9057	ENSMUSG00000031284	Pak3	2.15326	ENSMUSG00000090942	F830016B08Rik	6.69159
ENSMUSG00000027375	Mal	3.39831	ENSMUSG00000031397	Tktl1	3.74998	ENSMUSG00000092283	Gm20412	3.79624
ENSMUSG00000027379	Bub1	6.51975	ENSMUSG00000031400	G6pdx	3.04589	ENSMUSG00000095115	Itpripl2	2.97396
ENSMUSG00000027405	Nop56	2.76861	ENSMUSG00000031490	Eif4ebp1	2.86779	ENSMUSG00000097136	Gm26772	2.66118
ENSMUSG00000027423	Snx5	2.70138	ENSMUSG00000031551	Ido1	54.5717	ENSMUSG00000097315	Gm26568	3.02477
ENSMUSG00000027469	Tpx2	6.64926	ENSMUSG00000031584	Gsr	3.24588	ENSMUSG00000097454	Gm26892	5.98171
ENSMUSG00000027639	Samhd1	2.4466	ENSMUSG00000031604	Msmo1	2.88446	ENSMUSG00000097518	Gm26694	4.01385
ENSMUSG00000027641	Rbl1	2.59173	ENSMUSG00000031722	Hp	4.97651	ENSMUSG00000098489	Mir7678	15.8039
ENSMUSG00000027651	Rprd1b	3.24061	ENSMUSG00000031767	Nudt7	2.70421	ENSMUSG00000098847	Gm27235	19.2536
ENSMUSG00000027656	Wisp2	3.33452	ENSMUSG00000031870	Pgr	14.0161	ENSMUSG00000099583	Hist1h3d	2.69646
ENSMUSG00000027699	Ect2	6.0373	ENSMUSG00000031901	Dus2	10.0487	ENSMUSG00000100627	A830008E24Rik	4.51846
ENSMUSG00000027715	Ccna2	5.24856	ENSMUSG00000031982	Arv1	2.15304	ENSMUSG00000101972	Hist1h3i	3.21312
ENSMUSG00000027849	Syt6	21.4181	ENSMUSG00000031997	Trpc6	3.49515	ENSMUSG00000104378	Gm37510	3.77731
ENSMUSG00000027983	Cyp2u1	2.464	ENSMUSG00000032046	Abhd12	2.63793	ENSMUSG00000104574	Gm42836	5.02546
ENSMUSG00000028044	Cks1b	3.01061	ENSMUSG00000032113	Chek1	4.11842	ENSMUSG00000105476	Gm43740	7.80837
ENSMUSG00000028068	Iqgap3	7.18656	ENSMUSG00000032228	Tcf12	2.08819	ENSMUSG00000106957	Gm43085	50.2321
ENSMUSG00000028082	Sh3d19	4.96478	ENSMUSG00000032313	Tmem266	5.50077	ENSMUSG00000107198	Gm19619	8.42096
ENSMUSG00000028085	Gatb	4.87632	ENSMUSG00000032353	Tmed3	6.71877	ENSMUSG00000107736	Gm44148	4.44269
ENSMUSG00000028115	Bnipl	2.83699	ENSMUSG00000032356	Rasgrf1	5.27154	ENSMUSG00000108084	Gm7932	12.5428
ENSMUSG00000028121	Bcar3	6.30031	ENSMUSG00000032418	Me1	3.17988	ENSMUSG00000109501	Gm14377	5.54496
ENSMUSG00000028128	F3	11.0495	ENSMUSG00000032470	Mras	3.51035	ENSMUSG00000110404	Rnf223	4.36667
ENSMUSG00000028199	Cryz	3.65108	ENSMUSG00000032479	Map4	2.23719	ENSMUSG00000110457	RP24-248F14.2	17.0289
ENSMUSG00000028247	Coq3	2.75541	ENSMUSG00000032514	Ttc21a	2.92221	ENSMUSG00000111473	RP23-184M4.3	9.0796
ENSMUSG00000028255	Clca1	22.879	ENSMUSG00000032661	Oas3	3.31902	ENSMUSG00000111602	RP24-250L13.2	20.4855
ENSMUSG00000028289	Epha7	4.14454	ENSMUSG00000032883	Acsl3	2.41741
ENSMUSG00000028312	Smc2	3.28413	ENSMUSG00000032890	Rims3	2.16515
ENSMUSG00000028347	Tmeff1	6.49176	ENSMUSG00000033060	Lmo7	2.70326
ENSMUSG00000028358	Zfp618	2.65959	ENSMUSG00000033316	Galnt9	8.37456
ENSMUSG00000028654	Mycl	20.1825	ENSMUSG00000033352	Map2k4	2.89126
ENSMUSG00000028655	Mfsd2a	4.69784	ENSMUSG00000033852	Gm28042	2.12521
ENSMUSG00000028671	Gale	3.11948	ENSMUSG00000034107	Ano7	3.3489
ENSMUSG00000028678	Kif2c	3.63117	ENSMUSG00000034311	Kif4	2.59044
ENSMUSG00000028718	Stil	4.56324	ENSMUSG00000034327	Kctd9	2.96472
ENSMUSG00000028792	Ak2	2.53255	ENSMUSG00000034480	Diaph2	2.35805
ENSMUSG00000028807	Zbtb8a	3.23993	ENSMUSG00000034634	Ly6d	2.77472
ENSMUSG00000028832	Stmn1	4.39908	ENSMUSG00000034762	Glis1	10.1879
ENSMUSG00000028873	Cdca8	5.75515	ENSMUSG00000034912	Mdga2	19.9205
ENSMUSG00000028927	Padi2	8.06603	ENSMUSG00000035020	Epgn	28.4438
ENSMUSG00000028961	Pgd	2.37424	ENSMUSG00000035186	Ubd	4.83891
ENSMUSG00000029034	Cpsf3l	2.10316	ENSMUSG00000035578	Iqcg	2.44541
ENSMUSG00000029038	Ssu72	2.27162	ENSMUSG00000035818	Plekhs1	9.16829
ENSMUSG00000029086	Prom1	2.16586	ENSMUSG00000036046	5031439G07Rik	2.85415
ENSMUSG00000029177	Cenpa	3.63952	ENSMUSG00000036053	Fmnl2	7.87601
ENSMUSG00000029188	Slc34a2	6.49264	ENSMUSG00000036136	Fam110c	2.3769
ENSMUSG00000029291	Rufy3	3.7839	ENSMUSG00000036155	Mgat5	3.07544
ENSMUSG00000029322	Plac8	2.32712	ENSMUSG00000036402	Gng12	2.9137
ENSMUSG00000029335	Bmp3	7.65715	ENSMUSG00000036411	9530077C05Rik	3.98346
ENSMUSG00000029366	Dck	3.13473	ENSMUSG00000036452	Arhgap26	3.43857
ENSMUSG00000029371	Cxcl5	8.63121	ENSMUSG00000036523	Greb1	60.7889
ENSMUSG00000029375	Cxcl15	101.455	ENSMUSG00000036712	Cyld	2.15408
ENSMUSG00000029378	Areg	20.4546	ENSMUSG00000036745	Ttll7	3.84489
ENSMUSG00000029414	Kntc1	8.33538	ENSMUSG00000036777	Anln	5.02235
ENSMUSG00000029484	Anxa3	5.39379	ENSMUSG00000036894	Rap2b	3.80969
ENSMUSG00000029516	Cit	4.32666	ENSMUSG00000036944	Tmem71	4.9044
ENSMUSG00000029545	Acads	3.48292	ENSMUSG00000037143	Cfap61	6.64306
ENSMUSG00000029730	Mcm7	2.91638	ENSMUSG00000037185	Krt80	2.08689
ENSMUSG00000029811	Aoc1	290.68	ENSMUSG00000037613	Tnfrsf23	6.2011
ENSMUSG00000029910	Mad2l1	9.92045	ENSMUSG00000037679	Inf2	2.04236
ENSMUSG00000030107	Usp18	5.5333	ENSMUSG00000037820	Tgm2	4.91995
ENSMUSG00000030137	Tuba8	2.77669	ENSMUSG00000037833	Sh2d4b	13.3381
ENSMUSG00000030317	Timp4	3.00404	ENSMUSG00000037965	Zc3h7a	2.38507
ENSMUSG00000030530	Furin	3.39549	ENSMUSG00000037999	Arap2	4.9039
ENSMUSG00000030677	Kif22	3.63074	ENSMUSG00000038010	Ccdc138	2.17734
ENSMUSG00000030739	Myh14	2.20672	ENSMUSG00000038264	Sema7a	3.65976
ENSMUSG00000030748	Il4ra	3.5936	ENSMUSG00000038267	Slc22a23	4.00015
ENSMUSG00000030792	Dkkl1	4.39861	ENSMUSG00000038295	Atg9b	3.82951
ENSMUSG00000030852	Tacc2	3.36112	ENSMUSG00000038415	Foxq1	6.69181
ENSMUSG00000030854	Ptpn5	110.22	ENSMUSG00000038495	Otud7b	2.13183
ENSMUSG00000030867	Plk1	5.12597	ENSMUSG00000038665	Dgki	10.3764
ENSMUSG00000030978	Rrm1	2.64318	ENSMUSG00000038732	Mboat1	2.33556
ENSMUSG00000031004	Mki67	9.21868	ENSMUSG00000038844	Kif16b	2.8151
ENSMUSG00000031098	Syt8	6.41599	ENSMUSG00000038879	Nipal2	3.63267
ENSMUSG00000031168	Ebp	3.11348	ENSMUSG00000038893	Fam117a	3.5646
ENSMUSG00000031169	Porcn	5.20538	ENSMUSG00000038903	Ccdc68	2.22975
ENSMUSG00000031179	3830417A13Rik	16.4315	ENSMUSG00000038943	Prc1	2.56979
ENSMUSG00000031221	Igbp1	3.30489	ENSMUSG00000039092	Sptlc3	2.50172
ENSMUSG00000031232	Magt1	2.50974	ENSMUSG00000039194	Rlbp1	3.47185
ENSMUSG00000031262	Cenpi	3.1559	ENSMUSG00000039220	Ppp1r10	2.52347
ENSMUSG00000031286	Glt28d2	2.84431	ENSMUSG00000039232	Stx11	2.88899
ENSMUSG00000031400	G6pdx	4.48859	ENSMUSG00000039384	Dusp10	3.01418
ENSMUSG00000031402	Mpp1	2.90694	ENSMUSG00000039578	Ccser1	2.66812
ENSMUSG00000031431	Tsc22d3	2.85595	ENSMUSG00000039629	Strip2	2.44043
ENSMUSG00000031490	Eif4ebp1	2.78601	ENSMUSG00000039782	Cpeb2	3.79648
ENSMUSG00000031519	Asb5	2.23886	ENSMUSG00000039954	Stk32a	5.87705
ENSMUSG00000031545	Gpat4	2.77655	ENSMUSG00000040010	Slc7a5	2.83895
ENSMUSG00000031551	Ido1	53.2907	ENSMUSG00000040046	Tph1	16.2958
ENSMUSG00000031584	Gsr	2.51411	ENSMUSG00000040158	Tax1bp3	3.76952
ENSMUSG00000031722	Hp	20.2278	ENSMUSG00000040322	Slc25a24	2.52104
ENSMUSG00000031766	Slc12a3	24.3104	ENSMUSG00000040528	Milr1	3.62413
ENSMUSG00000031812	Map1lc3b	2.13157	ENSMUSG00000040594	Ranbp17	3.53318
ENSMUSG00000031870	Pgr	14.64	ENSMUSG00000040751	Lat2	2.93457
ENSMUSG00000031898	Dpep3	10.5908	ENSMUSG00000041144	Dnah7b	3.96226
ENSMUSG00000031901	Dus2	8.04638	ENSMUSG00000041482	Piezo2	2.6765
ENSMUSG00000031939	Taf1d	2.1623	ENSMUSG00000041523	Upk2	2.30131
ENSMUSG00000032046	Abhd12	2.26509	ENSMUSG00000041605	5730559C18Rik	3.79133
ENSMUSG00000032108	D730048I06Rik	60.2041	ENSMUSG00000041762	Gpr155	2.45033
ENSMUSG00000032113	Chek1	4.98598	ENSMUSG00000041886	Macc1	2.98573
ENSMUSG00000032218	Ccnb2	6.55876	ENSMUSG00000042029	Ncapg2	2.4413
ENSMUSG00000032228	Tcf12	2.66122	ENSMUSG00000042303	Sgsm3	4.2336
ENSMUSG00000032254	Kif23	4.03264	ENSMUSG00000042306	S100a14	6.66725
ENSMUSG00000032289	Thsd4	2.41049	ENSMUSG00000042410	Agps	5.16001
ENSMUSG00000032313	Tmem266	12.8983	ENSMUSG00000042428	Mgat3	6.56831
ENSMUSG00000032344	Mb21d1	4.57928	ENSMUSG00000042460	C1galt1	2.59246
ENSMUSG00000032353	Tmed3	9.09873	ENSMUSG00000042515	Mum1l1	7.30737
ENSMUSG00000032356	Rasgrf1	3.0398	ENSMUSG00000042694	Obfc1	2.36154
ENSMUSG00000032377	Plscr4	2.95504	ENSMUSG00000042751	Nmnat2	8.32348
ENSMUSG00000032400	Zwilch	2.77987	ENSMUSG00000042828	Trim72	3.62806
ENSMUSG00000032412	Atp1b3	6.20431	ENSMUSG00000042942	Greb1l	3.02356
ENSMUSG00000032418	Me1	2.58521	ENSMUSG00000043029	Trpv3	8.98048
ENSMUSG00000032470	Mras	7.62575	ENSMUSG00000043333	Rhbdl2	3.46352
ENSMUSG00000032479	Map4	2.77888	ENSMUSG00000043535	Setx	2.26321
ENSMUSG00000032540	Abhd5	2.88861	ENSMUSG00000043541	Casc1	5.27546
ENSMUSG00000032640	Chsy1	3.40837	ENSMUSG00000043639	Rbm20	13.3703
ENSMUSG00000032661	Oas3	3.27566	ENSMUSG00000044037	Als2cl	2.76411
ENSMUSG00000032715	Trib3	3.05644	ENSMUSG00000044072	Eml6	3.21561
ENSMUSG00000032725	Folr2	5.77665	ENSMUSG00000044083	Efcab8	5.12531
ENSMUSG00000032815	Fanca	2.11113	ENSMUSG00000044162	Tnip3	19.0308
ENSMUSG00000032883	Acsl3	4.41004	ENSMUSG00000044217	Aqp5	4.23704
ENSMUSG00000032902	Slc16a1	5.922	ENSMUSG00000044359	P2ry4	10.5336
ENSMUSG00000032939	Nup93	2.49432	ENSMUSG00000044393	Dsg2	2.21674
ENSMUSG00000033031	C330027C09Rik	4.29591	ENSMUSG00000044626	Liph	2.38138
ENSMUSG00000033032	Afap1l1	4.28396	ENSMUSG00000044646	Zbtb7c	2.49906
ENSMUSG00000033307	Mif	2.67662	ENSMUSG00000044976	Wdr72	2.55727
ENSMUSG00000033316	Galnt9	27.5565	ENSMUSG00000045027	Prss22	2.91595
ENSMUSG00000033436	Armcx2	2.01258	ENSMUSG00000045502	Hcar2	3.27849
ENSMUSG00000033590	Myo5c	2.29861	ENSMUSG00000045538	Ddx28	5.07988
ENSMUSG00000033684	Qsox1	2.17316	ENSMUSG00000045730	Adrb2	3.35812
ENSMUSG00000033847	Pla2g4c	3.18271	ENSMUSG00000045763	Basp1	2.37036
ENSMUSG00000033952	Aspm	4.31562	ENSMUSG00000045838	A430105I19Rik	2.31345
ENSMUSG00000034023	Fancd2	2.19128	ENSMUSG00000045968	Teddm2	3.134
ENSMUSG00000034271	Jdp2	2.17089	ENSMUSG00000046562	Unc119b	2.97502
ENSMUSG00000034275	Igsf9b	2.40468	ENSMUSG00000046623	Gjb4	4.77454
ENSMUSG00000034311	Kif4	9.04844	ENSMUSG00000046718	Bst2	2.08322
ENSMUSG00000034317	Trim59	3.32148	ENSMUSG00000046733	Gprc5a	2.6842
ENSMUSG00000034320	Slc26a2	2.31845	ENSMUSG00000046806	3110062M04Rik	2.14868
ENSMUSG00000034329	Brip1	2.90398	ENSMUSG00000046985	Tapt1	3.0369
ENSMUSG00000034430	Zxdc	2.45163	ENSMUSG00000047139	Cd24a	4.82764
ENSMUSG00000034459	Ifit1	2.89409	ENSMUSG00000047517	Dmbt1	7.30417
ENSMUSG00000034573	Ptpn13	3.25877	ENSMUSG00000048003	Catsper4	3.82926
ENSMUSG00000034855	Cxcl10	3.48929	ENSMUSG00000048249	Crebrf	2.32985
ENSMUSG00000034906	Ncaph	4.83521	ENSMUSG00000048482	Bdnf	2.35712
ENSMUSG00000034926	Dhcr24	4.63139	ENSMUSG00000048534	Amica1	4.91127
ENSMUSG00000035020	Epgn	37.2315	ENSMUSG00000048578	Mlec	2.56842
ENSMUSG00000035042	Ccl5	3.32684	ENSMUSG00000049001	Ndnf	3.2609
ENSMUSG00000035172	Plekhh3	3.18276	ENSMUSG00000049493	Pls1	3.44971
ENSMUSG00000035198	Tubg1	3.18959	ENSMUSG00000049550	Clip1	2.11123
ENSMUSG00000035342	Lzts2	2.19154	ENSMUSG00000049926	Olfr921	5.76121
ENSMUSG00000035351	Nup37	2.04877	ENSMUSG00000050272	Dscam	17.039
ENSMUSG00000035376	Hacd2	2.80066	ENSMUSG00000050335	Lgals3	4.14645
ENSMUSG00000035683	Melk	6.2283	ENSMUSG00000050359	Sprr1a	11.8468
ENSMUSG00000035934	Pknox2	6.63056	ENSMUSG00000050463	Krt78	15.452
ENSMUSG00000036046	5031439G07Rik	3.40003	ENSMUSG00000050635	Sprr2f	44.8444
ENSMUSG00000036053	Fmnl2	7.34166	ENSMUSG00000050730	Arhgap42	2.73991
ENSMUSG00000036136	Fam110c	4.52454	ENSMUSG00000051000	Fam160a1	3.27127
ENSMUSG00000036155	Mgat5	3.44678	ENSMUSG00000051076	Vtcn1	2.41245
ENSMUSG00000036402	Gng12	6.83605	ENSMUSG00000051081	Gm4847	16.6074
ENSMUSG00000036411	9530077C05Rik	2.68607	ENSMUSG00000051223	Bzw1	2.7666
ENSMUSG00000036452	Arhgap26	7.04925	ENSMUSG00000051335	Gfod1	2.74037
ENSMUSG00000036523	Greb1	99.2007	ENSMUSG00000051341	Zfp52	5.44245
ENSMUSG00000036745	Ttll7	7.6546	ENSMUSG00000052157	Gm650	5.67156
ENSMUSG00000036768	Kif15	9.84909	ENSMUSG00000052397	Ezr	6.93058
ENSMUSG00000036777	Anln	10.6861	ENSMUSG00000052512	Nav2	2.14364
ENSMUSG00000036894	Rap2b	2.7408	ENSMUSG00000052861	Dnah6	2.23045
ENSMUSG00000036944	Tmem71	4.04849	ENSMUSG00000053012	Krcc1	2.17182
ENSMUSG00000037086	Prr32	6.61244	ENSMUSG00000053581	Zfand2a	2.70933
ENSMUSG00000037145	2210407C18Rik	6.01527	ENSMUSG00000053687	Dpep2	11.5093
ENSMUSG00000037185	Krt80	3.35728	ENSMUSG00000053706	B430305J03Rik	3.27571
ENSMUSG00000037254	Itih2	3.46246	ENSMUSG00000053797	Krt16	8.29193
ENSMUSG00000037300	Ttc13	2.40242	ENSMUSG00000053980	Gm9930	5.66364
ENSMUSG00000037313	Tacc3	3.70824	ENSMUSG00000054072	Iigp1	3.81322
ENSMUSG00000037400	Atp11b	2.5332	ENSMUSG00000054161	Fam83e	6.16404
ENSMUSG00000037474	Dtl	4.16241	ENSMUSG00000054277	Arfgap3	2.94399
ENSMUSG00000037544	Dlgap5	8.18341	ENSMUSG00000054453	Sytl5	2.51905
ENSMUSG00000037601	Nme1	2.47797	ENSMUSG00000054537	Tmprss11e	30.3765
ENSMUSG00000037613	Tnfrsf23	4.91384	ENSMUSG00000054598	9130230L23Rik	5.31871
ENSMUSG00000037681	Esyt3	5.04913	ENSMUSG00000054619	Mettl7a1	3.04089
ENSMUSG00000037725	Ckap2	4.6004	ENSMUSG00000054679	Srsf12	3.6383
ENSMUSG00000037820	Tgm2	4.62875	ENSMUSG00000054728	Phactr1	23.5348
ENSMUSG00000037833	Sh2d4b	5.71309	ENSMUSG00000054892	Txk	3.69442
ENSMUSG00000037851	Iars	2.18644	ENSMUSG00000055301	Adh7	3.60096
ENSMUSG00000037894	H2afz	2.43776	ENSMUSG00000055471	Alk	4.17509
ENSMUSG00000037946	Fgd3	2.61767	ENSMUSG00000055523	Gucy2g	2.80749
ENSMUSG00000037999	Arap2	3.63424	ENSMUSG00000055882	Abhd16b	4.50053
ENSMUSG00000038020	Rapgefl1	3.38117	ENSMUSG00000055926	Gm14137	4.10286
ENSMUSG00000038267	Slc22a23	3.95857	ENSMUSG00000056222	Spock1	2.98216
ENSMUSG00000038295	Atg9b	8.69093	ENSMUSG00000056457	Prl2c3	6.65744
ENSMUSG00000038379	Ttk	3.81893	ENSMUSG00000056608	Chd9	2.40019
ENSMUSG00000038415	Foxq1	15.6118	ENSMUSG00000056656	Apol8	3.36608
ENSMUSG00000038665	Dgki	3.83212	ENSMUSG00000057378	Ryr3	7.65685
ENSMUSG00000038844	Kif16b	3.56171	ENSMUSG00000057421	Las1l	2.90329
ENSMUSG00000038893	Fam117a	2.41842	ENSMUSG00000057778	Cyb5d2	2.14678
ENSMUSG00000038943	Prc1	4.49867	ENSMUSG00000057835	Zfp119a	2.25786
ENSMUSG00000039016	Timm8b	2.06818	ENSMUSG00000058152	Chsy3	7.16084
ENSMUSG00000039062	Anpep	2.19663	ENSMUSG00000058354	Krt6a	7.39306
ENSMUSG00000039126	Prune2	3.72273	ENSMUSG00000058385	Hist1h2bg	2.62303
ENSMUSG00000039257	Vstm2b	15.3034	ENSMUSG00000058498	Rnf207	2.72988
ENSMUSG00000039304	Tnfsf10	2.74736	ENSMUSG00000058704	Memo1	3.92492
ENSMUSG00000039384	Dusp10	3.33699	ENSMUSG00000058773	Hist1h1b	2.55031
ENSMUSG00000039438	Ttc36	2.66823	ENSMUSG00000059668	Krt4	25.9695
ENSMUSG00000039672	Kcne2	11.7898	ENSMUSG00000059742	Kcnh7	3.59852
ENSMUSG00000039680	Mrps6	2.24763	ENSMUSG00000059751	Rps3a3	5.33916
ENSMUSG00000039954	Stk32a	5.41885	ENSMUSG00000060402	Chst8	17.7055
ENSMUSG00000040010	Slc7a5	8.12952	ENSMUSG00000060716	Plekhh1	2.80529
ENSMUSG00000040034	Nup43	2.40343	ENSMUSG00000061039	Olfr920	4.21603
ENSMUSG00000040046	Tph1	39.6492	ENSMUSG00000061126	Cyp4f39	3.3842
ENSMUSG00000040084	Bub1b	6.33316	ENSMUSG00000062901	Klhl24	2.91672
ENSMUSG00000040158	Tax1bp3	4.85129	ENSMUSG00000063142	Kcnma1	4.31446
ENSMUSG00000040204	2810417H13Rik	7.27796	ENSMUSG00000063506	Arhgap22	2.43164
ENSMUSG00000040528	Milr1	2.55637	ENSMUSG00000063522	2010109I03Rik	5.20228
ENSMUSG00000040594	Ranbp17	3.43792	ENSMUSG00000063838	1700027J19Rik	2.99072
ENSMUSG00000040653	Ppp1r14c	5.70215	ENSMUSG00000064293	Cntn4	9.97275
ENSMUSG00000041084	Ostc	2.40974	ENSMUSG00000064797	Gm24357	2.23635
ENSMUSG00000041219	Arhgap11a	5.07013	ENSMUSG00000067219	Nipal1	10.955
ENSMUSG00000041431	Ccnb1	6.30659	ENSMUSG00000067594	Krt77	19.9429
ENSMUSG00000041498	Kif14	6.24895	ENSMUSG00000067931	Zfp948	5.32601
ENSMUSG00000041605	5730559C18Rik	4.57967	ENSMUSG00000068246	Apol9b	3.01166
ENSMUSG00000041762	Gpr155	7.95866	ENSMUSG00000068250	Amn1	3.17317
ENSMUSG00000041859	Mcm3	3.57634	ENSMUSG00000068735	Trp53i11	2.83352
ENSMUSG00000042029	Ncapg2	3.99888	ENSMUSG00000069255	Dusp22	2.14978
ENSMUSG00000042225	Ammecr1	6.15593	ENSMUSG00000069310	Hist1h3c	2.65821
ENSMUSG00000042303	Sgsm3	3.05286	ENSMUSG00000070331	Qrich2	3.9481
ENSMUSG00000042306	S100a14	18.1699	ENSMUSG00000070385	Ampd1	5.37615
ENSMUSG00000042410	Agps	8.09327	ENSMUSG00000070419	Cyp3a57	13.4918
ENSMUSG00000042428	Mgat3	6.80076	ENSMUSG00000070427	Il18bp	2.02312
ENSMUSG00000042489	Clspn	4.12115	ENSMUSG00000070732	Rbm44	3.71957
ENSMUSG00000042751	Nmnat2	26.5253	ENSMUSG00000071398	2410004P03Rik	4.0512
ENSMUSG00000042828	Trim72	2.63062	ENSMUSG00000071722	Spin4	2.96572
ENSMUSG00000043029	Trpv3	19.0964	ENSMUSG00000071862	Lrrtm2	3.08965
ENSMUSG00000043639	Rbm20	8.52766	ENSMUSG00000072582	Ptrh2	2.43121
ENSMUSG00000044162	Tnip3	9.16662	ENSMUSG00000072591	5930412G12Rik	2.37933
ENSMUSG00000044217	Aqp5	5.06633	ENSMUSG00000072663	Spef2	2.18837
ENSMUSG00000044359	P2ry4	29.4415	ENSMUSG00000072845	Tmprss11a	40.6617
ENSMUSG00000044748	Defb1	21.0752	ENSMUSG00000073147	5031425E22Rik	4.48747
ENSMUSG00000045038	Prkce	2.80607	ENSMUSG00000073555	Gm4951	3.23713
ENSMUSG00000045328	Cenpe	8.13667	ENSMUSG00000074006	Omp	3.04249
ENSMUSG00000045502	Hcar2	3.62375	ENSMUSG00000074445	Sprr2a3	51.4549
ENSMUSG00000045538	Ddx28	5.88198	ENSMUSG00000074604	Mgst2	3.48718
ENSMUSG00000045573	Penk	9.8042	ENSMUSG00000074607	Tox2	3.29822
ENSMUSG00000045730	Adrb2	7.40374	ENSMUSG00000074796	Slc4a11	2.60271
ENSMUSG00000045751	Mms22l	2.12801	ENSMUSG00000074802	Gas2l3	4.77483
ENSMUSG00000045838	A430105I19Rik	2.96511	ENSMUSG00000074813	Gm14005	20.8752
ENSMUSG00000045968	Teddm2	2.62594	ENSMUSG00000074899	Sptbn5	3.81715
ENSMUSG00000046070	Igfals	3.22839	ENSMUSG00000075010	AW112010	2.58775
ENSMUSG00000046179	E2f8	5.22889	ENSMUSG00000075225	Ccdc162	5.82487
ENSMUSG00000046186	Cd109	3.08764	ENSMUSG00000075511	1700001L05Rik	4.3116
ENSMUSG00000046500	Fam19a4	10.2466	ENSMUSG00000075602	Ly6a	2.29842
ENSMUSG00000046562	Unc119b	3.18945	ENSMUSG00000078117	Gm16485	20.2351
ENSMUSG00000046591	Ticrr	4.84208	ENSMUSG00000078486	Perm1	2.0358
ENSMUSG00000046634	Pkd1l1	26.8228	ENSMUSG00000078627	March10	4.67702
ENSMUSG00000046718	Bst2	2.74728	ENSMUSG00000078937	Cpt1b	2.3965
ENSMUSG00000046733	Gprc5a	3.14182	ENSMUSG00000078945	Naip2	2.42712
ENSMUSG00000046807	Lrrc75b	4.12948	ENSMUSG00000078995	Zfp456	2.82794
ENSMUSG00000046818	Ddit4l	5.18743	ENSMUSG00000079053	Gm14010	8.47931
ENSMUSG00000046985	Tapt1	2.4938	ENSMUSG00000079138	Gm8818	5.84426
ENSMUSG00000047139	Cd24a	4.77074	ENSMUSG00000079144	A130010J15Rik	2.13958
ENSMUSG00000047260	Emc6	2.64982	ENSMUSG00000079429	Mroh2a	2.27977
ENSMUSG00000047295	Smgc	9.19344	ENSMUSG00000079554	Aox2	8.7611
ENSMUSG00000047517	Dmbt1	7.58973	ENSMUSG00000081355	Gm15264	2.06071
ENSMUSG00000047534	Mis18bp1	4.07385	ENSMUSG00000081512	Gm15821	3.91899
ENSMUSG00000047878	A4galt	3.37785	ENSMUSG00000081683	Fzd10	3.25223
ENSMUSG00000048022	Tmem229a	17.3387	ENSMUSG00000082180	Gm12230	2.94039
ENSMUSG00000048126	Col6a3	3.48826	ENSMUSG00000082361	Btc	3.9021
ENSMUSG00000048482	Bdnf	4.64293	ENSMUSG00000083014	Gm11764	4.40789
ENSMUSG00000048485	Zbtb8b	3.08796	ENSMUSG00000084834	4930565N06Rik	3.01465
ENSMUSG00000048578	Mlec	3.94143	ENSMUSG00000084878	Lrrc8dos	2.36445
ENSMUSG00000048644	Ctxn1	2.47038	ENSMUSG00000085023	Gm12744	2.76591
ENSMUSG00000048764	Tmprss11f	29.9873	ENSMUSG00000085205	Gm13185	3.97512
ENSMUSG00000048776	Pthlh	3.22137	ENSMUSG00000085234	Gm15614	2.89465
ENSMUSG00000048922	Cdca2	2.90457	ENSMUSG00000085276	Gm15812	20.9013
ENSMUSG00000049119	Fam110b	3.42665	ENSMUSG00000085289	Gm15337	3.34027
ENSMUSG00000049128	Ivl	28.9217	ENSMUSG00000085377	4930551L18Rik	2.43972
ENSMUSG00000049493	Pls1	2.51314	ENSMUSG00000085595	Gm16090	2.29024
ENSMUSG00000049539	Hist1h1a	10.0577	ENSMUSG00000085623	Gm16041	4.23333
ENSMUSG00000049892	Rasd1	5.1853	ENSMUSG00000085683	9130409J20Rik	14.2791
ENSMUSG00000049932	H2afx	3.42512	ENSMUSG00000085887	Arhgap27os3	3.3092
ENSMUSG00000050063	Klk6	13.7462	ENSMUSG00000085912	Trp53cor1	4.13399
ENSMUSG00000050108	Bpifc	18.7055	ENSMUSG00000086269	Tmcc3os	5.82777
ENSMUSG00000050335	Lgals3	2.85614	ENSMUSG00000086429	Gt(ROSA)26Sor	2.28339
ENSMUSG00000050359	Sprr1a	4.99988	ENSMUSG00000086825	Gm15675	2.98308
ENSMUSG00000050463	Krt78	21.4108	ENSMUSG00000087141	Plcxd2	4.01256
ENSMUSG00000050635	Sprr2f	26.1863	ENSMUSG00000087202	Gm15813	11.0243
ENSMUSG00000050936	Gm42743	5.33819	ENSMUSG00000087230	Mroh3	4.53479
ENSMUSG00000051000	Fam160a1	3.91501	ENSMUSG00000087231	E230016M11Rik	2.99781
ENSMUSG00000051065	Mb21d2	2.2914	ENSMUSG00000087265	Gm12349	4.26287
ENSMUSG00000051081	Gm4847	170.777	ENSMUSG00000087530	Gm15533	4.05686
ENSMUSG00000051220	Ercc6l	2.88953	ENSMUSG00000087543	Gm16576	2.30796
ENSMUSG00000051223	Bzw1	4.99618	ENSMUSG00000087698	Gm13031	4.88328
ENSMUSG00000051234	Rnf7	2.83847	ENSMUSG00000089678	Agxt2	4.97238
ENSMUSG00000051341	Zfp52	6.5776	ENSMUSG00000089710	Gm15810	32.2413
ENSMUSG00000051431	Gpr87	8.24916	ENSMUSG00000089774	Slc5a3	2.19599
ENSMUSG00000051726	Kcnf1	13.6309	ENSMUSG00000089886	Gm16184	2.47105
ENSMUSG00000052397	Ezr	9.82181	ENSMUSG00000089952	4933413C19Rik	2.89296
ENSMUSG00000052565	Hist1h1d	5.51094	ENSMUSG00000090135	Gm15809	19.247
ENSMUSG00000052854	Nrk	7.60622	ENSMUSG00000090173	Fbxw10	5.15372
ENSMUSG00000053317	Sec61b	2.95907	ENSMUSG00000090214	Gm15657	5.71828
ENSMUSG00000053442	4930597O21Rik	4.98026	ENSMUSG00000090223	Pcp4	13.4476
ENSMUSG00000053522	Lgals7	16.3269	ENSMUSG00000090708	Gm17196	4.4628
ENSMUSG00000053687	Dpep2	22.3252	ENSMUSG00000090863	A530084C06Rik	4.95849
ENSMUSG00000053706	B430305J03Rik	2.58044	ENSMUSG00000090942	F830016B08Rik	7.2466
ENSMUSG00000053797	Krt16	15.0471	ENSMUSG00000090946	Ccdc71l	7.7556
ENSMUSG00000054072	Iigp1	5.00446	ENSMUSG00000091997	Gm6611	3.00864
ENSMUSG00000054146	Krt15	7.57127	ENSMUSG00000092283	Gm20412	5.31509
ENSMUSG00000054161	Fam83e	9.86768	ENSMUSG00000095115	Itpripl2	2.99184
ENSMUSG00000054408	Spcs3	2.54471	ENSMUSG00000096035	Gm1045	7.24778
ENSMUSG00000054453	Sytl5	3.26484	ENSMUSG00000096959	4930509G22Rik	3.53099
ENSMUSG00000054537	Tmprss11e	63.071	ENSMUSG00000097282	5031415H12Rik	2.91593
ENSMUSG00000054619	Mettl7a1	2.22358	ENSMUSG00000097300	Gm26835	2.76789
ENSMUSG00000054728	Phactr1	19.6556	ENSMUSG00000097354	2310001H17Rik	2.11083
ENSMUSG00000054753	AU018091	3.48478	ENSMUSG00000097454	Gm26892	8.06141
ENSMUSG00000055301	Adh7	13.1848	ENSMUSG00000097603	A430010J10Rik	5.62923
ENSMUSG00000055333	Fat2	3.78025	ENSMUSG00000097761	4930534D22Rik	6.37372
ENSMUSG00000055373	Fut9	2.59314	ENSMUSG00000097800	B230344G16Rik	2.6737
ENSMUSG00000055471	Alk	4.64594	ENSMUSG00000097990	Gm19557	3.98414
ENSMUSG00000055737	Ghr	3.58257	ENSMUSG00000098488	Pla2g4b	2.4675
ENSMUSG00000055882	Abhd16b	3.25102	ENSMUSG00000099032	Tcf24	2.09718
ENSMUSG00000055980	Irs1	5.21099	ENSMUSG00000099227	Mir8114	3.0694
ENSMUSG00000056214	Pard6g	5.71847	ENSMUSG00000100627	A830008E24Rik	4.8603
ENSMUSG00000056222	Spock1	3.20839	ENSMUSG00000101926	Gm28904	4.66098
ENSMUSG00000056267	Cep70	2.92471	ENSMUSG00000101972	Hist1h3i	2.52868
ENSMUSG00000056394	Lig1	2.1971	ENSMUSG00000102148	Gm38059	4.07497
ENSMUSG00000056418	BC043934	7.78973	ENSMUSG00000102202	Gm33280	2.57429
ENSMUSG00000056632	Dsg3	6.58852	ENSMUSG00000102599	Gm38386	6.13871
ENSMUSG00000057315	Arhgap24	14.2421	ENSMUSG00000102644	Thap6	2.08794
ENSMUSG00000057378	Ryr3	17.5897	ENSMUSG00000102732	Gm37342	3.2735
ENSMUSG00000057409	Zfp53	2.31684	ENSMUSG00000102950	Gm37018	2.83239
ENSMUSG00000057615	Ldoc1	9.93032	ENSMUSG00000103285	Gm37274	2.6014
ENSMUSG00000057666	Gapdh	2.08558	ENSMUSG00000103672	Gm37621	3.01278
ENSMUSG00000057706	Mex3b	4.75388	ENSMUSG00000103966	Gm37120	2.53538
ENSMUSG00000058152	Chsy3	22.94	ENSMUSG00000104061	Gm37953	3.7192
ENSMUSG00000058258	Idi1	2.69753	ENSMUSG00000104107	Gm37879	2.47609
ENSMUSG00000058290	Espl1	3.68992	ENSMUSG00000104292	Gm38042	2.77244
ENSMUSG00000058354	Krt6a	15.0637	ENSMUSG00000104378	Gm37510	4.69273
ENSMUSG00000058385	Hist1h2bg	4.77522	ENSMUSG00000104406	Gm38014	3.20915
ENSMUSG00000058498	Rnf207	6.63225	ENSMUSG00000104449	Gm37255	2.76755
ENSMUSG00000058656	Samd12	3.97269	ENSMUSG00000104467	Gm37660	2.47944
ENSMUSG00000058704	Memo1	5.16658	ENSMUSG00000104574	Gm42836	4.73352
ENSMUSG00000058773	Hist1h1b	8.63955	ENSMUSG00000104641	Gm43290	3.51021
ENSMUSG00000059668	Krt4	65.7604	ENSMUSG00000104671	Gm43062	2.84221
ENSMUSG00000059743	Fdps	2.59799	ENSMUSG00000104754	Gm43116	2.95593
ENSMUSG00000060402	Chst8	5.91444	ENSMUSG00000105042	Gm42509	7.18465
ENSMUSG00000060548	Tnfrsf19	7.5853	ENSMUSG00000105140	Gm43127	2.58579
ENSMUSG00000060568	Fam78b	6.0123	ENSMUSG00000105293	Gm42843	2.71948
ENSMUSG00000061126	Cyp4f39	2.87725	ENSMUSG00000105326	6030400A10Rik	3.07206
ENSMUSG00000061397	Krt79	13.7651	ENSMUSG00000105356	Gm42603	4.48238
ENSMUSG00000061615	Hist1h2ab	6.04487	ENSMUSG00000105374	Gm42551	4.32533
ENSMUSG00000061991	Hist1h2af	4.41848	ENSMUSG00000105449	Gm43379	2.86961
ENSMUSG00000062098	Btbd3	7.77034	ENSMUSG00000105476	Gm43740	9.45959
ENSMUSG00000063021	Hist1h2ak	6.06509	ENSMUSG00000105643	Gm42611	2.45735
ENSMUSG00000063229	Ldha	2.30082	ENSMUSG00000105707	Gm43753	4.78043
ENSMUSG00000063727	Tnfrsf11b	2.60612	ENSMUSG00000105981	2810428J06Rik	3.10982
ENSMUSG00000063838	1700027J19Rik	2.84357	ENSMUSG00000106088	Gm44342	6.81252
ENSMUSG00000064168	Hist1h2bh	5.20498	ENSMUSG00000106121	Gm42679	14.7848
ENSMUSG00000064193	Gm4735	2.24872	ENSMUSG00000106596	Gm42822	3.10928
ENSMUSG00000064288	Hist1h4k	3.1328	ENSMUSG00000106739	Gm43499	2.50484
ENSMUSG00000064293	Cntn4	7.19069	ENSMUSG00000106957	Gm43085	15.2414
ENSMUSG00000064797	Gm24357	5.10041	ENSMUSG00000106959	Gm42548	3.07535
ENSMUSG00000065265	Gm23455	2.79469	ENSMUSG00000106961	Gm43128	4.39509
ENSMUSG00000066108	Muc5b	8.90448	ENSMUSG00000107096	Gm43597	4.67391
ENSMUSG00000067158	Col4a4	3.50873	ENSMUSG00000107115	Gm43052	2.45449
ENSMUSG00000067219	Nipal1	7.8197	ENSMUSG00000107116	Gm43274	2.59112
ENSMUSG00000067455	Hist1h4j	2.94063	ENSMUSG00000107198	Gm19619	11.806
ENSMUSG00000067594	Krt77	115.883	ENSMUSG00000107304	Gm43775	2.51329
ENSMUSG00000067931	Zfp948	5.81951	ENSMUSG00000107306	Gm42577	4.81254
ENSMUSG00000068699	Flnc	3.44913	ENSMUSG00000107320	Gm42549	4.04062
ENSMUSG00000068735	Trp53i11	2.54943	ENSMUSG00000107461	Gm44045	2.50783
ENSMUSG00000068744	Psrc1	3.53815	ENSMUSG00000107749	Gm44321	3.00043
ENSMUSG00000069255	Dusp22	2.62682	ENSMUSG00000108084	Gm7932	10.2116
ENSMUSG00000069265	Hist1h3a	2.41715	ENSMUSG00000108161	Gm44269	3.00275
ENSMUSG00000069266	Hist1h4b	3.66911	ENSMUSG00000109122	A230103L15Rik	4.43257
ENSMUSG00000069267	Hist1h3b	7.18399	ENSMUSG00000109251	E230032D23Rik	3.85245
ENSMUSG00000069270	Hist1h2ac	4.33917	ENSMUSG00000109305	1810010D01Rik	2.74384
ENSMUSG00000069272	Hist1h2ae	5.23266	ENSMUSG00000109501	Gm14377	6.91263
ENSMUSG00000069273	Hist1h3e	4.4141	ENSMUSG00000109539	Gm44667	2.74794
ENSMUSG00000069300	Hist1h2bj	5.49582	ENSMUSG00000109564	Muc16	10.7668
ENSMUSG00000069310	Hist1h3c	7.42787	ENSMUSG00000109735	Gm45667	2.19399
ENSMUSG00000069793	Slfn9	2.54909	ENSMUSG00000109841	E330011O21Rik	2.72739
ENSMUSG00000069808	Fam57a	2.4798	ENSMUSG00000110185	Igip	2.01721
ENSMUSG00000070385	Ampd1	4.2879	ENSMUSG00000110377	Gm45363	4.16373
ENSMUSG00000070419	Cyp3a57	8.30075	ENSMUSG00000110457	RP24-248F14.2	7.73082
ENSMUSG00000070867	Trabd2b	17.2647	ENSMUSG00000110622	KIAA1683	3.87114
ENSMUSG00000071516	Hist1h2ai	4.58758	ENSMUSG00000111065	RP23-106F10.2	2.62051
ENSMUSG00000072663	Spef2	2.28671	ENSMUSG00000111077	RP23-5H4.2	4.11079
ENSMUSG00000072845	Tmprss11a	188.031	ENSMUSG00000111473	RP23-184M4.3	7.32788
ENSMUSG00000072889	Nfxl1	2.31084	ENSMUSG00000111602	RP24-250L13.2	36.2792
ENSMUSG00000072949	Acot1	2.49431	ENSMUSG00000111627	RP24-226H19.1	4.01343
ENSMUSG00000073555	Gm4951	3.27315	ENSMUSG00000111865	RP23-88C11.2	5.66724
ENSMUSG00000073771	Btbd19	2.35555
ENSMUSG00000073985	Gm10602	2.28245
ENSMUSG00000074182	Znhit6	5.57193
ENSMUSG00000074207	Adh1	2.23347
ENSMUSG00000074403	Hist2h3b	2.36142
ENSMUSG00000074445	Sprr2a3	19.1497
ENSMUSG00000074505	Fat3	9.30773
ENSMUSG00000074796	Slc4a11	2.62227
ENSMUSG00000074802	Gas2l3	4.59116
ENSMUSG00000074813	Gm14005	17.7814
ENSMUSG00000074818	Pdzd7	2.35566
ENSMUSG00000075029	4930558J22Rik	3.6579
ENSMUSG00000075031	Hist1h2bb	6.38651
ENSMUSG00000075225	Ccdc162	2.71893
ENSMUSG00000075701	Selenos	2.2131
ENSMUSG00000078117	Gm16485	15.7596
ENSMUSG00000078532	Nkain1	5.35131
ENSMUSG00000078627	March10	5.2875
ENSMUSG00000079112	Fam90a1a	8.90534
ENSMUSG00000079138	Gm8818	15.7671
ENSMUSG00000079362	Gm43302	2.58409
ENSMUSG00000079451	Tmprss11g	20.4242
ENSMUSG00000079470	Utp14b	4.1446
ENSMUSG00000079554	Aox2	11.7627
ENSMUSG00000081512	Gm15821	2.75463
ENSMUSG00000082361	Btc	3.00704
ENSMUSG00000085023	Gm12744	4.67224
ENSMUSG00000085289	Gm15337	4.08326
ENSMUSG00000085996	A830012C17Rik	6.35668
ENSMUSG00000086312	Gm15336	5.04657
ENSMUSG00000086801	Gm15943	2.09569
ENSMUSG00000087265	Gm12349	3.73362
ENSMUSG00000087698	Gm13031	6.11457
ENSMUSG00000087700	Gm15283	2.89149
ENSMUSG00000089678	Agxt2	2.03611
ENSMUSG00000089710	Gm15810	10.2287
ENSMUSG00000089774	Slc5a3	2.50027
ENSMUSG00000090214	Gm15657	4.44703
ENSMUSG00000090223	Pcp4	33.6356
ENSMUSG00000090710	Gm9513	10.2926
ENSMUSG00000090863	A530084C06Rik	10.0039
ENSMUSG00000090942	F830016B08Rik	3.96286
ENSMUSG00000090946	Ccdc71l	4.87271
ENSMUSG00000091017	Fam71a	3.70395
ENSMUSG00000091383	Hist1h2al	2.72595
ENSMUSG00000091405	Hist2h4	2.75491
ENSMUSG00000091898	Tnnc1	10.1254
ENSMUSG00000092283	Gm20412	4.86249
ENSMUSG00000092586	Ly6g6c	3.06894
ENSMUSG00000092812	Gm23634	3.26811
ENSMUSG00000093315	Mir5114	3.42142
ENSMUSG00000093656	Gm20628	4.48667
ENSMUSG00000093755	Vmn1r39	10.9245
ENSMUSG00000094338	Hist1h2bl	5.21796
ENSMUSG00000095115	Itpripl2	2.95152
ENSMUSG00000095217	Hist1h2bn	4.86368
ENSMUSG00000096035	Gm1045	9.9905
ENSMUSG00000096221	1500002C15Rik	2.51397
ENSMUSG00000096807	Hist1h2bm	4.88853
ENSMUSG00000097002	Gm2670	3.33237
ENSMUSG00000097518	Gm26694	5.72302
ENSMUSG00000097603	A430010J10Rik	6.61642
ENSMUSG00000097800	B230344G16Rik	2.29605
ENSMUSG00000097990	Gm19557	2.76825
ENSMUSG00000098489	Mir7678	19.4644
ENSMUSG00000098847	Gm27235	27.9049
ENSMUSG00000099146	0610031O16Rik	5.7889
ENSMUSG00000099227	Mir8114	2.57353
ENSMUSG00000099583	Hist1h3d	5.03565
ENSMUSG00000099913	Gm28551	2.58439
ENSMUSG00000100210	Hist1h3f	3.12227
ENSMUSG00000100627	A830008E24Rik	4.65584
ENSMUSG00000101355	Hist1h3h	6.21704
ENSMUSG00000101972	Hist1h3i	6.62701
ENSMUSG00000102299	Gm37539	2.29173
ENSMUSG00000103301	Gm37804	3.70326
ENSMUSG00000103857	Gm37249	3.55957
ENSMUSG00000104432	A430027C01Rik	2.29716
ENSMUSG00000104467	Gm37660	2.53549
ENSMUSG00000104574	Gm42836	5.17015
ENSMUSG00000104580	Gm42620	2.26881
ENSMUSG00000104713	Gbp6	2.44787
ENSMUSG00000104997	Gm44350	3.36943
ENSMUSG00000105072	Gm44335	3.86532
ENSMUSG00000105109	Gm44297	4.57403
ENSMUSG00000105580	Gm44454	5.2135
ENSMUSG00000105682	Gm44323	4.95458
ENSMUSG00000105827	Hist2h2bb	5.52797
ENSMUSG00000105987	AI506816	2.94708
ENSMUSG00000106088	Gm44342	14.1495
ENSMUSG00000106200	Gm44341	2.85338
ENSMUSG00000106203	Gm44484	5.30738
ENSMUSG00000106431	Gm44492	2.20126
ENSMUSG00000106957	Gm43085	61.9972
ENSMUSG00000107736	Gm44148	4.36606
ENSMUSG00000108084	Gm7932	20.1121
ENSMUSG00000108436	Gm44851	10.3876
ENSMUSG00000108722	Gm44944	14.6635
ENSMUSG00000109251	E230032D23Rik	3.46732
ENSMUSG00000109501	Gm14377	5.76858
ENSMUSG00000110404	Rnf223	6.51725
ENSMUSG00000110457	RP24-248F14.2	16.6189
ENSMUSG00000110631	RP24-286J21.7	5.25231
ENSMUSG00000111473	RP23-184M4.3	11.222
ENSMUSG00000111602	RP24-250L13.2	23.4676
