# Supplementary material
Source: Research Square preprint supplement (doi:10.21203/rs.3.rs-9812305/v1)
Supplement: Supplementary file 13 [file d84fc876cf2156999776e44e.xlsx]

## Sheet: Sheet1
Table 11. Comparison of upregulated genes upon treatments in epithelial cells of vagina
Common genes in "Up by E4low epith.", "Up by E4Hi epith." and "Up by E2 epith."	Common genes in "Up by E2 epith." and "Up by E4Hi epith."	Common genes in "Up by E4low epith." and "Up by E4Hi epith."	Common genes in "Up by E4low epith." and "Up by E2 epith."	Genes specifically upregulated by E2	Genes specifically upregulated by E4low	Genes specifically upregulated by E4Hi
Aaas	Adgrf4	Actg1	Aacs	Abce1	Abcc5	Abtb2
Aars	Adrm1	Adam11	Aadacl2	Acat2	Aldh18a1	Adrb2
Aarsd1	Adssl1	Atg9b	Alg3	Acsl4	Aldh1l1	Agtr2
Abcb9	Akirin1	Bmp1	Aprt	Actr2	Alg8	Aldh1a7
Abcf2	Ammecr1	Bmp2	Arhgef39	Aimp2	Angptl4	Azin2
Abi3	Areg	Caln1	Arl4d	Ak6	Ankle1	B3gnt2
Ablim3	Arhgap27	Cfap43	Armt1	Ankrd22	Atic	Bmp8a
Abracl	Arhgap27os2	Col16a1	Ccdc58	Ankrd49	Atp2a3	Ccdc71l
Acat3	Arid3a	Crnn	Ccdc88a	Anp32b	Atp6v0a4	Ccnd2
Ackr3	Arl5c	Cspg4	Cdc34	Anp32e	Atp8b2	Cdk2
Acp5	Aspa	Depdc1b	Cdk2ap1	Apex1	Calhm2	Cdr2
Acsbg1	Bcar3	Dnmt1	Chek2	Apip	Camkk1	Chsy1
Actb	Bcl11b	Edn2	Cpt2	Arg1	Ccsap	Ciart
Actn1	Bfsp1	Exoc3l2	Cst6	Asb16	Cerk	Clca2
Actr3	Ccdc38	Fanca	Ctnnbip1	Asb5	Ces2g	Clcf1
Adk	Ccne2	Ggt6	Ctnnd2	Atf5	Chit1	Cldn4
Adm	Cd200	Hspb1	Cyp51	Atp10d	Clic3	Dennd2c
Adtrp	Cdc7	Htr1d	Dcakd	Atp5f1	Clstn2	Dmbt1
Afap1l1	Cdkn2aipnl	Iffo2	Dctpp1	Atp5g3	Col12a1	Dnajb4
Ahcy	Celf2	Lamb3	Dmkn	Atp5k	Cox10	Dusp10
Ahcyl2	Cldnd1	Mecr	Dnajc9	Bak1	Crlf1	Dusp6
Ak1	Cmc2	Mir711	Dpy19l1	Bcap29	Dact2	Dusp8
Ak2	Col4a3	Mtss1	Eef1akmt1	Bmp2k	Ddit4	Emp1
Ak4	Col4a4	Ncs1	Ell2	Bora	Dlx2	Epha2
Aknad1	Cox5a	Neil3	Emp3	Brix1	Efna3	Fbxo30
Aldh1l2	Ctbs	Ntrk2	Fbxo5	Bud31	Ephx2	Fezf2
Alg14	Cyp2s1	Pkmyt1	Fdft1	C1qbp	Flna	Fkbp5
Alpl	Dhcr7	Poc1a	Fzd10	Cacybp	Flrt1	Fndc10
Alyref	Dhrs9	Pold1	Gas2l3	Cadm1	Foxk2	Foxp2
Amd1	Dio2	Popdc3	Gtse1	Calm1	Gatsl3	Fsbp
Anapc15	Dusp9	Ptgdr2	Has3	Capn2	Gdnf	Gadd45a
Ankrd35	E2f6	Ptprs	Hist1h2bp	Capza1	Gpc3	Gar1
Anln	Eda	Rapgefl1	Hmgcr	Carnmt1	Gpm6a	Glo1
Ap1s1	Eif2s2	Rcor2	Hmgcs1	Cars	Gpr157	Glud1
Apitd1	Eif4e	Ror2	Hyal2	Ccnb1ip1	Hist1h1c	Gpc4
Aqp3	Ereg	Samd5	Ifi30	Cct2	Hist4h4	Hbegf
Arhgap11a	Eva1a	Slc29a1	Krt75	Cct8	Hn1	Hmox1
Arhgap19	Exosc6	Slc2a12	Krt90	Cd3eap	Hr	Hspa1a
Arl4a	F3	Snrnp25	Krtdap	Cirh1a	Il17rb	Hspa1b
Armc6	Fancb	Sp6	Lamb1	Cited1	Il22ra1	Igfbp3
Asf1b	Fbln2	Unc13d	Lor	Clec2f	Insig1	Klf6
Asns	Fbln7	Vsig8	Lpar5	Cnih1	Itga5	Lrrc20
Aspm	Foxo6		Lrp8	Cnot6	Itm2a	Lypd8
Ass1	Fzd5		Mab21l3	Cnot9	Krt1	Mest
Atad2	Galnt1		Mak16	Comtd1	Lbr	Mir22
Atp1b3	Ggct		Mars	Cops3	Ldlr	Mir22hg
Atp2c2	Gltp		Mlec	Cops5	Ldlrad3	Muc3
Aurka	Gng5		Mroh6	Cops6	Lmo1	Mxd1
Aurkb	Gpd2		Ndufc1	Cops7a	Maf	Myadml2os
Avpi1	Gpr87		Nop2	Cox5b	Mir1957a	Naip1
Banf1	Grhl3		Nop56	Cox7b	Mir3113	Nipal1
Bard1	Hephl1		Nsdhl	Ctnnbl1	Mir6903	Notumos
Bcat1	Hhip		Nudt5	Cuzd1	Mir8094	Nr1d1
Bcl2l13	Hmga1		Pdlim7	Cyp4a10	Mt4	Osr2
Bdh1	Hmgn1		Pitx1	Dcaf13	Nav1	Otud1
Bhlhe41	Irf6		Praf2	Ddx21	Nde1	Ovgp1
Birc5	Isl2		Psmc4	Denr	Ndufa4l2	Ovol1
Blm	Itga6		Psmd1	Dera	Ndufb6	Pask
Bnc1	Jdp2		Psmd2	Dnajc2	Nol10	Pax9
Bok	Kcnn4		Psmd6	Dpy30	Nptxr	Pde10a
Bop1	Krt4		Psmg1	Dus1l	Odc1	Per2
Bpifc	Lipn		Rexo2	Dynlrb1	Perm1	Piga
Brca1	Lnx2		Sbsn	Eif1ad	Pfas	Pim1
Brip1	Lrrc8b		Scrn3	Eif2b3	Ppp1r18os	Plau
Bub1	Lrrc8c		Sec13	Eif3b	Ppp5c	Plk2
Bub1b	Lsm6		Sema3d	Eif3j2	Prr7	Pola1
Bub3	Lypla1		Sirpa	Elfn1	Psrc1	Prdm1
Bysl	Mall		Slc25a39	Ercc1	Ptp4a3	Prr16
Bzw1	Maoa		Slc26a6	Erlin1	Rin1	Ptgr1
Cad	Map1lc3a		Slc27a3	Fbl	Rnf26	Ptpn5
Cald1	Map7d1		Spink5	Fbn1	Rps3a2	Pxdc1
Calm4	March4		Spon2	Fgf14	Rps3a3	Rab20
Capg	Mbnl3		Ssr2	Fkbp1a	Rrp9	Rab30
Capns2	Mboat2		Stip1	Frg1	Rtn4r	Rap2b
Car13	Mdfi		Stmn1	Gemin6	Ryr1	Rapgef4
Car2	Memo1		Strc	Glrx	Sapcd2	Sall3
Cav1	Mfap3l		Thoc3	Glyat	Sec14l2	Serpinb2
Cav2	Mfsd5		Tpi1	Gpr85	Slc16a9	Serpine1
Ccdc124	Mia2		Ttll3	Grhpr	Sostdc1	Sesn2
Ccdc86	Mir675		Tvp23a	Gspt1	Spsb4	Siah1b
Ccna2	Mis18a		Umps	Gsta1	Stfa3	Siah2
Ccnb1	Morf4l2		Usp39	Hars	Suox	Slc19a2
Ccnb2	Mpzl2			Hddc2	Taf1d	Slco4a1
Ccne1	Mrps23			Hdgf	Tbc1d7	Spin4
Ccnf	Msrb2			Heatr3	Thop1	Stc2
Cct3	Mthfd1			Hikeshi	Timm50	Stk17b
Cct6a	Naf1			Hist1h2br	Tk1	Sybu
Cd109	Nccrp1			Hist2h3c1	Tkfc	Tagap
Cd44	Nes			Hist2h4	Tnks1bp1	Tcf19
Cdc20	Ngef			Hmgb1	Trbc2	Tesk2
Cdc25b	Nhp2			Hmgn2	Trim47	Thbs1
Cdc25c	Notum			Hn1l	Trp63	Thbs2
Cdc45	Padi2			Hnrnpab	Vangl2	Tiparp
Cdc6	Pak6			Hypk	Wnt3	Tmem121
Cdca2	Pbdc1			Id4	Xylt1	Tmtc1
Cdca3	Pcna			Il33	Ywhag	Tnfaip8l3
Cdca4	Perp			Irak4	Zxdc	Trib1
Cdca5	Phf5a			Itpa		Trim62
Cdca8	Pidd1			Ivl		Vldlr
Cdh24	Pm20d1			Jagn1		Vps37b
Cdk1	Pmepa1			Kank1		Wdr53
Cdkn1a	Pola2			Klhl5		Wee1
Cdkn3	Prkar2a			Klk10		Xrcc2
Cdt1	Procr			Kpnb1		Zmynd19
Celf4	Prss57			Kti12
Cemip	Psma5			Lactb2
Cenpa	Psma6			Llph
Cenpe	Psmd8			Lpar2
Cenpf	Ptges3			Lsm7
Cenph	Reep4			Lsm8
Cenpi	Rgs7bp			Magoh
Cenpk	S100a10			Mb21d1
Cenpm	S100a4			Mcph1
Cenpn	Serpinb6a			Med8
Cenpp	Sgpp1			Mnd1
Cenpt	Sh3bgrl2			Mphosph10
Cenpv	Sh3tc2			Mphosph6
Cenpw	Skint3			Mrpl13
Cep55	Slc37a3			Mrpl17
Cfl1	Slurp1			Mrpl18
Chaf1a	Snrpa1			Mrpl21
Chaf1b	Snrpf			Mrpl22
Chchd4	Sowahc			Mrpl42
Chek1	Sprr1a			Mrpl51
Chst11	Stard13			Mrpl57
Chst8	Stat5b			Mrps14
Chtf18	Tex2			Mrps16
Cit	Tex30			Mrps18b
Ckap2	Tgm1			Mrps22
Ckap2l	Timm8a1			Msx2
Ckmt1	Tinagl1			Mtbp
Cks1b	Tmed5			mt-Ta
Cks2	Tmigd1			mt-Tc
Clic1	Tmprss11e			mt-Tn
Clspn	Tmprss11f			Mtx2
Cnn2	Tmtc3			Myeov2
Col17a1	Topbp1			Ndc1
Col18a1	Trex2			Ndufaf4
Col7a1	Ttc39b			Ndufaf8
Coro1c	U2af1			Ndufs6
Cotl1	Ube2n			Nedd8
Cpne5	Uqcrq			Nhp2l1
Crabp2	Vamp3			Nifk
Csrp1	Wdr61			Nip7
Csrp2	Wipi1			Nmd3
Csta1	Xxylt1			Nme2
Cth	Ywhah			Noc4l
Ctps	Zcchc10			Npm3
Cxcl14				Nsmce1
Cycs				Nudt1
Cyp3a13				Nup35
Cyp4f39				Oip5
Cysrt1				Ola1
Dbf4				Orc6
Dbi				Ostc
Dbp				P4ha1
Dck				Pcna-ps2
Ddias				Pdap1
Ddx39				Pdzd11
Depdc1a				Pfdn4
Depdc7				Pfkfb3
Desi2				Pgd
Dhcr24				Phtf2
Dhfr				Pja1
Diaph3				Pld1
Dio3				Polr1d
Dkc1				Polr2d
Dna2				Polr2j
Dnph1				Ppih
Dsc1				Ppp3r1
Dsc2				Prkg2
Dsc3				Psma1
Dscc1				Psma2
Dse				Psma4
Dsg1a				Psmb2
Dsg1b				Psmb3
Dsg3				Psmb5
Dsn1				Psmb6
Dsp				Psmb7
Dtl				Psmc1
Duox1				Psmc2
Duoxa1				Psmc3ip
Dusp22				Psmc5
Dusp7				Psmd12
Dut				Psmd3
Dynll1				Psmd7
E2f1				Psmg3
E2f7				Pten
E2f8				Pus7l
Ect2				Rab11a
Eef1e1				Rad23b
Efnb1				Rarres1
Ehd1				Rasgrp1
Ehd2				Rbmxl1
Eif2s1				Rfc2
Eif4ebp1				Rfc3
Eif5a				Rfc4
Eif6				Rfc5
Elovl6				Ripk3
Eme1				Rpf1
Enah				Rpf2
Eno1				Rpl36al
Eno1b				Rpl7l1
Epgn				Rps19bp1
Ephx3				Rps27l
Ercc6l				Ruvbl1
Erh				Rwdd1
Esco2				S100a6
Esd				Sae1
Espl1				Sec61b
Ethe1				Sema4d
Exo1				Sephs2
Exosc9				2011-09-01
Fabp5				Set
Fads3				Sf3b5
Fancd2				Sf3b6
Fanci				Sfxn1
Fblim1				Skp2
Fbln1				Slc24a5
Fcamr				Smap1
Fdps				Smn1
Fen1				Smyd2
Fhl2				Snrpb2
Fhl3				Snrpd2
Fignl1				Snrpd3
Fkbp10				Snrpe
Flrt2				Snrpert
Foxm1				Snrpg
Fscn1				Socs1
Fstl3				Sox15
Fzd6				Sprr1b
G6pdx				Sprr2a1
Gal3st1				Sprr2a2
Gale				Srgap1
Gap43				Srsf1
Gapdh				Srsf9
Gars				Ssu72
Gart				Stard4
Gcat				Stoml2
Gcsh				Taf12
Gdpd2				Taf9
Gen1				Tfg
Gins1				Thyn1
Gins3				Timm13
Gja1				Timm23
Gjb2				Timm8b
Gjb4				Tma7
Gjb5				Tmprss13
Gjb6				Tmsb10
Gli2				Tnfrsf23
Gls2				Tomm22
Gng12				Tomm5
Gpsm2				Tpm3-rs7
Gpt2				Tpmt
Gpx1				Trappc1
Gramd2				Tstd3
Greb1				Ttc9
Grwd1				Uba3
Gsg2				Ube2a
Gsta2				Urah
H19				Usp1
H2afx				Usp14
H2afz				Xpo1
H60c				Xpot
Hagh				Ywhaz
Hat1				Zbed4
Haus1				Zfp706
Hells
Hif1a
Higd1a
Hint1
Hist1h1a
Hist1h1b
Hist1h1d
Hist1h1e
Hist1h2ab
Hist1h2ac
Hist1h2ad
Hist1h2ae
Hist1h2af
Hist1h2ag
Hist1h2ah
Hist1h2ai
Hist1h2ak
Hist1h2al
Hist1h2an
Hist1h2bb
Hist1h2bc
Hist1h2be
Hist1h2bf
Hist1h2bg
Hist1h2bh
Hist1h2bj
Hist1h2bk
Hist1h2bl
Hist1h2bm
Hist1h2bn
Hist1h3a
Hist1h3b
Hist1h3c
Hist1h3d
Hist1h3e
Hist1h3f
Hist1h3g
Hist1h3h
Hist1h3i
Hist1h4a
Hist1h4b
Hist1h4f
Hist1h4i
Hist1h4j
Hist1h4k
Hist1h4n
Hist2h2ac
Hist2h2bb
Hist2h3b
Hist3h2a
Hmga1-rs1
Hmgb2
Hmmr
Homer3
Hpgds
Hprt
Hras
Hs3st6
Hsd17b7
Hspa4
Hspd1
Hspe1
Htra1
Idi1
Ifrd2
Igfbp2
Igsf3
Igsf9
Il18
Il1r2
Il4ra
Impdh1
Incenp
Inf2
Iqgap3
Irx1
Itga3
Itgb4
Jakmip1
Jup
Kcnk6
Kif11
Kif14
Kif15
Kif18b
Kif20a
Kif20b
Kif22
Kif23
Kif2c
Kif4
Kifc1
Kifc5b
Klc1
Klrg2
Kmt5a
Knl1
Knstrn
Kntc1
Kpna2
Kras
Krt10
Krt12
Krt13
Krt14
Krt16
Krt17
Krt42
Krt5
Krt6a
Krt6b
Krt76
Lad1
Lama1
Lamc2
Lancl1
Lbhd1
Ldha
Letm1
Lfng
Lgals7
Lig1
Lmnb1
Lrat
Lrr1
Lrrc59
Lsm2
Lsm4
Lsm5
Ltb4r1
Ltb4r2
Ly6a
Lyar
Lypd3
Lzts1
Mad1l1
Mad2l1
Mafb
Map3k6
Map4
Map6
Mapk6
Mastl
Mb21d2
Mcm10
Mcm2
Mcm3
Mcm4
Mcm5
Mcm6
Mcm7
Mdga1
Mdh2
Melk
Mfsd2a
Mgst3
Mif
Mir5046
Mis18bp1
Mki67
Mlkl
Mmp28
Mms22l
Mob3b
Mpp1
Mrc2
Mreg
Mrpl20
Mrpl36
Mrto4
Msmo1
Msn
Mtfr2
Mthfd1l
Mthfd2
Mvk
Mxd3
Myadm
Mybl2
Myo19
Myo5a
Naaa
Nasp
Nat8l
Ncapg
Ncapg2
Ncaph
Ncbp1
Ndc80
Nectin1
Nek2
Neto2
Neu3
Nipal4
Nme1
Nmnat3
Nrm
Nsl1
Nt5dc2
Nuak1
Nubp1
Nudcd2
Nuf2
Nup37
Nup43
Nup93
Nusap1
Orc1
Oxct1
Oxtr
P2ry2
P3h2
P3h4
Pa2g4
Padi3
Padi4
Palld
Papss2
Pard6g
Parpbp
Pbk
Pcdh18
Pcp4
Pcsk6
Pde7b
Pdgfb
Pdlim2
Peli2
Pfn1
Pgam1
Pgk1
Pgr
Phf19
Phgdh
Phospho1
Phyhip
Pi15
Pif1
Pkm
Pknox2
Pkp1
Pkp3
Pla2g4a
Plbd1
Plcd1
Plk1
Plk4
Plod1
Plp2
Plxna2
Pmf1
Pno1
Pole
Pole2
Polq
Polr3g
Pop1
Ppa1
Ppard
Ppia
Ppif
Ppil1
Ppm1g
Ppp1r14b
Ppp1r14c
Ppp1r18
Pqlc3
Prc1
Prcp
Prelid1
Prim1
Prkcdbp
Prkcg
Prokr2
Prr11
Prss23
Prss23os
Psapl1
Psat1
Psmd14
Psph
Ptgfrn
Ptgs1
Ptgs2
Pttg1
Pycard
Qsox2
Rab38
Rab44
Racgap1
Rad18
Rad51
Rad51ap1
Rad51c
Rad54b
Ran
Ranbp1
Rangap1
Rars
Rbl1
Rbm20
Rbp1
Rbp2
Rcc1
Rccd1
Rdh12
Recql4
Rfng
Rgs10
Rnf126
Rnf7
Rpa1
Rpa2
Rps4l
Rps6ka4
Rrm1
Rrm2
Rrp12
Rwdd3
Rxfp1
S100a14
S100a16
S100g
Scarb1
Sdc1
Selenoh
Sema5a
Serpinb5
Serpinh1
Sfn
Sfr1
Sgol1
Sgol2a
Sh2d5
Sh3bgrl3
Shcbp1
Shmt2
Sidt2
Sigmar1
Sipa1l2
Ska1
Ska3
Sla2
Slc12a4
Slc16a1
Slc16a12
Slc16a14
Slc16a3
Slc16a6
Slc25a48
Slc2a1
Slc2a5
Slc35f1
Slc39a6
Slc6a2
Slc7a1
Slc7a5
Slc7a8
Slfn9
Slmo2
Smc2
Smc4
Snn
Snrpd1
Snx5
Sorcs2
Spag5
Sparc
Spc24
Spc25
Spdl1
Sprr2a3
Sprr2f
Sprr2g
Sqle
Srm
Ssx2ip
Stab1
Stat5a
Stil
Strap
Sv2b
Syce2
Syk
Syt16
Tacc3
Tagln2
Tarm1
Tars
Tcp1
Tead4
Teddm3
Tenm4
Tfdp1
Tfrc
Tgfb1
Tgfb2
Tgfbi
Tgm5
Ticrr
Timeless
Tipin
Tll1
Tmprss11a
Tmprss11b
Tmprss11g
Tnfrsf12a
Tnni2
Tns4
Toe1
Tomm40
Tomt
Top2a
Tpm2
Tpm4
Tprg
Tpx2
Traip
Trim17
Trim59
Trip13
Trmt6
Trmt61a
Troap
Trp53inp2
Tspan9
Ttc39c
Ttk
Ttll12
Tuba1c
Tuba4a
Tuba8
Tubb5
Tubg1
Twf1
Txn1
Txndc17
Tyms
Uba2
Ube2c
Ubxn11
Uchl3
Uchl5
Ucn2
Ugdh
Uhrf1
Ulbp1
Ung
Uox
Upk3bl
Uqcc2
Uqcrc1
Vasp
Vdac1
Wdhd1
Wdr62
Wnt10a
Wnt3a
Wnt4
Wscd2
Xdh
Xpnpep1
Zfp385a
Zfp52
Zwilch
