# Supplementary material
Source: Research Square preprint supplement (doi:10.21203/rs.3.rs-9812305/v1)
Supplement: Supplementary file 14 [file fc9560658f1f99316d0dd622.xlsx]

## Sheet: Table 6 Uterus and vagina RNAse
Gene-ID	Gene-Name	LCR1-Vagina-EpPlusYFPPlus-OVX	LCR2-Vagina-CD90-2PlusYFPPlus-OVX	LCR3-Vagina-EpPlusYFPPlus-OVX	LCR4-Vagina-CD90-2PlusYFPPlus-OVX	LCR5-Uterus-EpPlus-OVX	LCR6-Uterus-CD90-2Plus-OVX	LCR7-Uterus-EpPlus-OVX	LCR8-Uterus-CD90-2Plus-OVX	LCR15-Vagina-EpPlusYFPPlus-OVXPlusE2	LCR16-Vagina-CD90-2PlusYFPPlus-OVXPlusE2	LCR17-Vagina-EpPlusYFPPlus-OVXPlusE2	LCR18-Vagina-CD90-2PlusYFPPlus-OVXPlusE2	LCR19-Uterus-EpPlus-OVXPlusE2	LCR20-Uterus-CD90-2Plus-OVXPlusE2	LCR21-Uterus-EpPlus-OVXPlusE2	LCR22-Uterus-CD90-2Plus-OVXPlusE2	LCR29-Vagina-EpPlusYFPPlus-OVXPlusE4low	LCR30-Vagina-CD90-2PlusYFPPlus-OVXPlusE4low	LCR31-Vagina-EpPlusYFPPlus-OVXPlusE4low	LCR32-Vagina-CD90-2PlusYFPPlus-OVXPlusE4low	LCR33-Uterus-EpPlus-OVXPlusE4low	LCR34-Uterus-CD90-2Plus-OVXPlusE4low	LCR35-Uterus-EpPlus-OVXPlusE4low	LCR36-Uterus-CD90-2Plus-OVXPlusE4low	LCR43-Vagina-EpPlusYFPPlus-OVXPlusE4Hi	LCR44-Vagina-CD90-2PlusYFPPlus-OVXPlusE4Hi	LCR45-Vagina-EpPlusYFPPlus-OVXPlusE4Hi	LCR46-Vagina-CD90-2PlusYFPPlus-OVXPlusE4Hi	LCR47-Uterus-EpPlus-OVXPlusE4Hi	LCR48-Uterus-CD90-2Plus-OVXPlusE4Hi	LCR49-Uterus-EpPlus-OVXPlusE4Hi	LCR50-Uterus-CD90-2Plus-OVXPlusE4Hi
ENSMUSG00000000001	Gnai3	2481	2341	2542	2787	2270	3204	1581	2452	4955	1245	4697	1450	2040	2695	1879	2228	3567	2377	3693	2533	2367	2389	1781	1984	4362	2745	4292	2612	1962	2194	1424	2245
ENSMUSG00000000003	Pbsn	0	0	0	0	0	0	5	0	0	0	0	0	0	0	0	0	0	0	0	0	0	0	0	0	0	0	0	0	0	0	0	0
ENSMUSG00000000028	Cdc45	58	90	117	43	106	135	101	157	364	73	393	21	25	71	50	90	355	36	301	41	40	58	34	48	430	63	383	72	52	19	26	58
ENSMUSG00000000031	H19	126	121	77	1307	142	1066	10	776	2546	208	2694	212	0	20	0	18	1110	11	1224	88	0	88	0	119	1464	179	1840	254	17	109	5	26
ENSMUSG00000000037	Scml2	130	222	109	142	116	141	134	206	110	135	107	131	13	98	15	160	198	132	178	192	0	115	4	99	119	198	147	197	29	135	5	111
ENSMUSG00000000049	Apoh	5	26	5	22	10	27	10	30	13	11	27	0	34	16	11	18	24	21	22	21	0	16	8	14	11	20	11	21	15	13	9	15
ENSMUSG00000000056	Narf	751	410	868	685	248	320	281	572	602	177	602	282	324	461	564	487	586	237	488	245	405	434	423	476	502	320	506	297	479	344	397	326
ENSMUSG00000000058	Cav2	1309	363	1343	675	537	244	562	289	4005	291	3528	182	287	260	408	233	2717	260	2859	521	516	109	356	136	3974	509	3708	538	495	156	267	149
ENSMUSG00000000078	Klf6	8180	8084	6435	5143	21213	12037	15925	7583	4624	7263	4129	10389	37684	14244	27727	10012	4556	4331	3160	7636	36878	13590	27458	10361	24313	14023	15055	14171	24580	14724	30359	14648
ENSMUSG00000000085	Scmh1	1342	2175	1313	2287	1457	1728	1291	1648	925	1017	957	937	648	824	894	909	1064	1762	911	1550	677	1166	868	1047	977	1457	1014	1512	1268	1129	866	957
ENSMUSG00000000088	Cox5a	870	264	1012	469	574	300	448	234	2106	903	2285	504	1380	776	1596	690	1842	414	1862	403	1622	388	1403	398	2034	502	1848	528	1512	498	1284	531
ENSMUSG00000000093	Tbx2	1614	264	1539	268	145	95	191	175	871	156	1021	121	42	180	22	178	1567	111	1479	132	32	320	30	251	1100	124	1056	214	115	176	43	190
ENSMUSG00000000094	Tbx4	9	242	7	390	4	5	5	0	0	239	0	413	0	47	4	90	3	247	0	236	0	20	4	16	5	346	5	536	5	18	0	42
ENSMUSG00000000103	Zfy2	0	0	0	0	0	0	0	0	0	0	0	0	0	0	0	0	0	0	0	0	0	0	0	0	0	0	0	0	0	0	0	0
ENSMUSG00000000120	Ngfr	2356	246	1751	188	132	221	72	248	694	6495	1021	8013	96	8128	167	8458	681	3633	586	2368	162	7673	176	12210	568	6001	563	5972	1547	19363	64	9360
ENSMUSG00000000125	Wnt3	5	17	61	276	4	2	0	7	51	146	45	11	0	0	0	2	252	3	215	6	0	0	4	8	138	79	108	57	3	0	5	4
ENSMUSG00000000126	Wnt9a	40	1193	31	1710	66	823	5	549	77	281	103	393	113	590	71	477	24	2749	31	1643	37	618	42	1060	56	764	63	558	83	535	64	442
ENSMUSG00000000127	Fer	679	701	621	781	752	557	696	645	1098	540	999	514	532	994	749	1155	1310	803	1264	798	414	622	599	651	988	830	924	750	607	727	625	963
ENSMUSG00000000131	Xpo6	2428	1929	2302	2074	2468	2870	2477	2849	1943	1660	1886	1702	1641	2609	1482	2618	2160	2475	1963	2212	1852	2764	1747	2023	2294	2673	2217	2689	1772	2316	1567	2665
ENSMUSG00000000134	Tfe3	769	1135	790	822	949	1209	939	1046	927	758	832	735	644	957	635	1122	912	1225	792	1293	1008	1322	719	1164	966	1263	1014	1270	868	1398	617	1301
ENSMUSG00000000142	Axin2	161	4709	255	5417	745	3832	886	2632	59	3341	43	3212	92	1705	110	2135	126	6763	135	4241	153	2687	143	3976	104	4958	105	3891	312	3609	68	1945
ENSMUSG00000000148	Brat1	308	172	341	235	86	143	162	198	282	135	311	192	79	186	121	280	304	226	310	211	108	171	169	266	278	238	244	175	204	239	127	245
ENSMUSG00000000149	Gna12	729	1328	904	1514	979	1531	986	1342	469	1391	504	1128	524	1361	550	1514	768	1654	592	1416	686	1415	607	1789	691	1506	637	1580	809	2134	381	1681
ENSMUSG00000000154	Slc22a18	218	34	301	55	57	12	96	4	222	21	258	21	204	51	227	81	345	28	430	44	199	22	270	31	282	34	301	35	179	55	178	69
ENSMUSG00000000157	Itgb2l	64	2	31	0	60	0	101	0	0	0	0	11	50	0	64	2	3	0	0	0	46	2	64	0	0	0	0	0	80	0	64	0
ENSMUSG00000000159	Igsf5	288	17	281	78	768	454	877	918	191	0	316	21	711	428	1302	217	191	0	99	14	901	476	797	378	259	2	112	7	1718	244	782	118
ENSMUSG00000000167	Pih1d2	27	22	65	14	66	10	58	23	55	32	56	11	38	28	47	48	47	17	47	27	60	29	49	25	41	23	57	30	71	19	47	44
ENSMUSG00000000168	Dlat	896	629	988	824	435	353	339	442	1668	436	1598	705	387	586	660	612	1290	575	1405	578	660	515	547	553	1377	624	1294	579	797	575	680	563
ENSMUSG00000000171	Sdhd	646	237	960	510	373	267	324	242	1579	488	1425	282	549	572	667	739	1387	400	1537	452	779	318	730	396	1386	457	1384	478	757	426	592	567
ENSMUSG00000000182	Fgf23	0	22	0	2	14	154	5	57	0	0	0	11	0	0	0	0	0	3	0	91	0	9	0	4	0	2	0	7	0	4	0	0
ENSMUSG00000000183	Fgf6	0	0	0	0	0	0	0	0	0	0	0	0	0	0	0	0	0	0	0	0	0	0	0	0	0	0	0	0	0	0	0	0
ENSMUSG00000000184	Ccnd2	4733	2753	5721	6393	3964	4350	2562	4438	9244	1951	8357	1561	657	2029	355	1377	6710	2839	7024	2905	122	1464	203	1022	11234	2424	10359	2602	544	1016	224	1643
ENSMUSG00000000194	Gpr107	1715	1200	1829	1489	1134	1109	1215	1146	1672	1017	1598	846	873	1299	947	1590	1657	1388	1862	1259	1124	1331	1100	1608	1549	1136	1478	1288	1060	1409	1010	1232
ENSMUSG00000000197	Nalcn	97	222	3	113	14	323	20	251	2	21	0	31	0	71	4	76	0	49	7	53	3	53	8	38	3	18	0	21	24	10	0	104
ENSMUSG00000000202	Btbd17	5	4	0	0	27	4	48	5	0	0	0	0	63	0	89	0	0	3	0	0	145	0	143	2	0	0	0	0	71	2	144	0
ENSMUSG00000000204	Slfn4	9	0	5	0	24	2	10	2	6	0	0	0	229	6	149	8	0	0	4	2	292	20	225	0	5	0	19	6	38	4	140	4
ENSMUSG00000000214	Th	0	36	0	0	0	0	5	0	0	0	0	0	0	0	0	0	0	0	0	0	0	0	4	0	0	0	0	0	0	0	0	0
ENSMUSG00000000215	Ins2	3	0	0	0	0	0	0	0	0	0	0	0	0	0	4	0	0	0	0	0	0	0	0	0	0	0	0	0	40	2	0	0
ENSMUSG00000000216	Scnn1g	1888	7	2050	22	17	2	43	0	288	0	415	11	88	2	22	0	80	5	86	2	32	6	12	4	185	2	137	9	33	7	22	2
ENSMUSG00000000223	Drp2	55	1676	21	1504	43	173	24	268	2	1401	5	1853	0	748	8	955	13	3725	22	3255	6	745	4	860	15	3374	24	3381	113	976	0	1155
ENSMUSG00000000244	Tspan32	5	21	7	6	24	17	5	31	0	0	0	81	9	18	4	16	3	3	4	4	0	9	0	2	3	13	0	9	5	13	9	11
ENSMUSG00000000247	Lhx2	3	6	11	2	10	5	5	15	0	0	5	31	9	4	0	4	11	5	4	0	0	0	8	0	3	2	0	0	3	0	0	2
ENSMUSG00000000248	Clec2g	145	9	95	30	10	2	15	4	57	21	56	31	17	2	15	2	54	3	53	4	40	6	23	4	30	5	49	21	10	2	0	2
ENSMUSG00000000253	Gmpr	134	27	133	43	248	110	267	206	62	0	49	11	79	36	117	85	57	11	50	17	196	79	158	53	58	12	53	14	155	27	47	71
ENSMUSG00000000263	Glra1	14	12	7	2	43	17	39	44	0	42	0	21	17	4	15	8	0	11	0	11	29	20	49	6	0	18	3	18	24	4	0	0
ENSMUSG00000000266	Mid2	1414	784	1286	929	913	775	791	832	1132	229	1116	282	1965	307	1766	391	1048	548	1080	519	1857	578	1022	466	949	610	962	600	1247	482	1652	342
ENSMUSG00000000275	Trim25	2255	1489	2629	1277	2320	1247	2453	1366	2499	550	2035	675	9259	1303	6176	1280	1629	822	1835	803	7547	1662	5803	1460	1786	936	2146	894	4216	970	4912	1131
ENSMUSG00000000276	Dgke	297	175	237	272	333	226	310	272	378	94	335	141	324	264	185	257	360	182	362	207	281	227	236	242	299	163	351	173	371	336	241	285
ENSMUSG00000000278	Scpep1	426	2307	517	2959	897	2258	639	1998	360	965	395	1369	719	1568	791	1431	429	1662	482	1773	683	3098	595	3088	316	1544	353	1483	767	2588	621	1614
ENSMUSG00000000282	Mnt	786	1047	768	1146	1193	1404	1253	1052	607	893	586	494	840	826	947	669	504	1129	666	1192	827	1115	805	994	699	980	796	937	1029	954	946	927
ENSMUSG00000000290	Itgb2	5	7	7	2	14	5	5	4	8	21	7	11	17	53	11	53	6	7	0	6	15	8	19	4	0	2	0	12	50	35	22	66
ENSMUSG00000000295	Hddc2	321	79	345	181	406	67	367	94	656	115	819	172	611	131	827	211	447	122	577	98	603	79	782	82	596	99	527	112	1027	99	925	113
ENSMUSG00000000296	Tpd52l1	198	37	265	24	442	57	472	52	139	21	185	31	416	81	710	80	124	19	105	27	521	39	423	17	208	7	135	7	898	54	807	73
ENSMUSG00000000301	Pemt	51	29	63	22	80	40	86	38	55	104	45	51	59	81	82	87	83	34	53	38	71	39	79	48	56	49	47	50	85	43	55	91
ENSMUSG00000000303	Cdh1	16270	290	18860	1392	13969	323	18101	203	11094	1100	11110	796	28620	110	22856	345	10097	69	9990	135	25233	295	19943	38	12027	727	11159	796	18265	412	21326	107
ENSMUSG00000000305	Cdh4	27	63	47	72	66	60	81	64	10	52	18	31	158	41	263	41	34	5	62	12	145	34	102	46	20	18	24	35	891	68	431	31
ENSMUSG00000000308	Ckmt1	1430	68	1984	543	192	10	243	4	5514	602	5715	282	2916	18	3085	64	5842	36	6567	59	3066	50	2331	10	5251	345	5005	314	3907	120	3176	20
ENSMUSG00000000317	Bcl6b	33	17	35	18	383	92	348	112	20	0	23	11	0	69	11	64	26	9	31	29	23	85	12	55	11	34	24	31	106	117	13	71
ENSMUSG00000000318	Clec10a	27	2	9	2	4	0	0	0	2	0	3	0	0	2	4	0	3	0	0	0	0	0	0	0	0	0	0	0	10	2	0	0
ENSMUSG00000000320	Alox12	705	34	802	41	60	58	120	60	64	32	49	0	54	20	25	57	29	34	56	34	20	25	38	21	83	23	110	9	54	19	17	20
ENSMUSG00000000325	Arvcf	1061	627	1014	663	518	226	491	251	631	374	535	423	142	307	132	389	897	473	869	499	173	285	165	291	829	378	670	324	172	245	123	332
ENSMUSG00000000326	Comt	1320	943	1361	1202	630	528	591	484	920	1017	875	1249	424	1267	415	1333	910	1073	875	1009	507	764	528	847	913	991	786	873	556	920	402	981
ENSMUSG00000000339	Rtca	426	355	429	502	238	419	181	319	618	374	659	272	175	405	195	384	596	414	599	446	230	327	165	296	566	468	588	464	272	327	148	313
ENSMUSG00000000340	Dbt	628	300	702	553	323	244	505	311	447	146	471	272	125	369	401	377	409	354	433	330	320	262	255	347	483	303	488	279	511	270	359	322
ENSMUSG00000000346	Dazap2	3653	2247	3804	2859	2715	3900	2015	2650	3327	1453	3230	1792	4071	1990	3702	1859	2715	1752	2773	1969	4394	1862	3494	1733	3326	2224	3200	2222	3839	2310	3294	1768
ENSMUSG00000000355	Mcts1	565	239	423	407	300	178	315	213	791	332	819	242	437	467	543	554	676	383	626	361	445	322	318	345	661	398	572	355	575	363	499	400
ENSMUSG00000000359	Rem1	0	291	7	402	27	244	34	303	0	260	0	302	5	280	0	250	3	431	0	445	0	471	4	442	0	201	0	259	24	368	0	230
ENSMUSG00000000365	Rnf17	11	7	0	0	17	14	5	18	8	0	18	0	38	26	15	18	0	0	10	0	12	6	15	29	0	9	5	2	5	7	9	26
ENSMUSG00000000374	Trappc10	2299	1249	2074	1250	1618	1417	1643	1250	1721	1017	1773	836	864	1197	1043	1198	1721	1292	1678	1234	1167	1036	1037	930	1775	1435	1743	1467	1376	1187	1111	1122
ENSMUSG00000000378	Ccm2	244	353	233	338	386	384	377	394	311	301	276	433	300	407	252	391	250	391	289	329	275	373	270	330	291	380	244	360	338	353	283	330
ENSMUSG00000000381	Wap	0	2	3	0	4	7	5	4	0	0	0	0	0	0	0	0	0	0	4	0	0	0	0	0	0	0	0	0	0	0	0	4
ENSMUSG00000000384	Tbrg4	931	506	828	421	1094	889	1339	716	1692	664	1635	433	860	528	887	630	1495	508	1506	404	946	567	1156	423	1350	518	1443	422	914	443	854	502
ENSMUSG00000000385	Tmprss2	2525	108	2500	28	3407	77	3429	80	293	21	253	21	2152	26	2780	44	280	9	123	29	2976	90	2305	21	877	25	718	19	3448	93	3611	13
ENSMUSG00000000386	Mx1	84	27	209	45	30	9	43	12	160	11	218	61	781	43	656	27	113	32	50	34	963	90	1100	85	115	54	126	59	380	11	309	11
ENSMUSG00000000392	Fap	18	486	59	163	17	39	39	75	0	94	3	252	79	1383	32	1758	6	239	4	670	46	985	42	775	0	181	3	148	155	1169	55	1583
ENSMUSG00000000394	Gcg	0	2	0	0	0	0	0	2	0	0	0	41	5	4	0	0	0	0	0	4	0	2	0	0	0	15	0	6	0	0	0	0
ENSMUSG00000000399	Ndufa9	470	249	792	528	257	257	262	253	907	187	957	333	370	407	359	470	1048	331	1138	339	400	273	356	312	865	349	895	356	450	339	359	368
ENSMUSG00000000402	Egfl6	130	49	159	64	1081	67	1710	91	31	0	14	41	707	205	933	166	119	9	139	48	711	53	756	38	51	17	45	4	1678	57	1301	120
ENSMUSG00000000409	Lck	51	34	31	14	43	60	67	43	26	0	36	0	34	38	64	36	18	17	13	11	46	60	49	63	24	4	26	6	50	40	17	37
ENSMUSG00000000411	Tssk3	3	12	3	8	4	15	15	22	4	0	5	0	9	4	8	0	6	7	0	4	17	6	23	6	5	9	9	7	31	4	13	4
ENSMUSG00000000416	Cttnbp2	868	409	796	574	557	674	348	662	2	249	5	162	499	223	461	157	16	212	16	314	408	294	685	749	34	351	28	522	312	343	89	187
ENSMUSG00000000420	Galnt1	1357	1951	1347	2725	1341	1862	848	1692	4204	1111	4033	1269	1504	1629	1812	1600	2517	2310	2319	2426	2070	1559	1598	1735	3408	2242	3309	2066	2213	1988	1808	1605
ENSMUSG00000000435	Myf5	0	9	0	0	0	0	0	4	0	21	0	0	0	0	0	2	3	9	0	6	0	0	0	2	0	7	0	4	0	4	0	0
ENSMUSG00000000439	Mkrn2	1568	1469	1677	1307	1144	1644	1158	1460	1243	1090	1181	977	698	1055	848	1261	1356	1204	1319	1460	858	1389	1048	1384	1413	1547	1472	1471	1177	1381	723	1046
ENSMUSG00000000440	Pparg	84	123	93	82	47	5	67	12	17	187	9	212	287	18	302	36	16	232	22	558	179	18	150	14	70	306	36	216	111	43	98	44
ENSMUSG00000000441	Raf1	2512	2407	2623	2004	1951	2855	2277	2629	2155	2107	2035	1923	1583	2117	1883	2231	2425	2270	2457	2493	1707	2754	2144	2670	2345	2808	2492	2881	2238	2799	1381	2101
ENSMUSG00000000486	Sept1	49	61	45	90	47	55	101	64	19	21	29	71	79	65	103	67	16	61	40	43	66	51	98	110	32	58	21	40	57	55	68	58
ENSMUSG00000000489	Pdgfb	137	9	115	24	159	32	234	17	282	94	331	41	540	28	479	51	268	3	255	7	561	18	446	4	346	29	315	19	263	11	292	29
ENSMUSG00000000530	Acvrl1	334	2022	461	2475	495	591	572	591	88	924	74	1178	698	555	465	735	134	2040	169	2118	541	780	494	747	115	1470	110	1272	689	1188	448	932
ENSMUSG00000000531	Grasp	222	868	197	630	673	1798	539	1769	22	623	36	554	183	375	125	306	52	613	71	694	142	962	217	821	32	560	53	588	218	845	106	516
ENSMUSG00000000532	Acvr1b	1261	426	1469	652	643	479	848	491	558	249	577	302	1301	381	1575	465	686	341	645	344	1269	423	1430	300	744	393	756	360	2095	535	1673	482
ENSMUSG00000000538	Tom1l2	1537	1918	1331	1741	1210	2097	1177	2203	909	1328	861	1168	553	1203	791	1215	1020	1633	1246	1589	700	1241	629	1305	1381	1846	1245	1902	1458	1759	845	1223
ENSMUSG00000000544	Gpa33	18	2	27	4	4	0	5	0	8	0	5	0	84	0	25	0	11	0	10	2	37	0	30	0	45	0	61	0	0	0	5	2
ENSMUSG00000000552	Zfp385a	290	407	359	380	40	153	72	133	920	353	1008	252	117	213	75	310	1107	331	1187	431	125	241	128	255	799	382	916	266	158	463	85	297
ENSMUSG00000000555	Itga5	286	3662	277	809	2517	4368	3329	3346	353	2687	322	2879	2190	5740	2035	3905	624	5242	546	6412	2707	9386	2159	3714	610	2933	502	3586	2072	3916	2408	7036
ENSMUSG00000000560	Gabra2	0	11	0	0	4	5	0	7	0	21	0	0	0	0	0	0	0	0	0	9	0	8	0	2	0	0	0	0	8	0	0	0
ENSMUSG00000000561	Wdr77	1311	755	1407	964	1124	1151	1039	1360	2410	467	2254	413	636	893	741	978	2258	916	2509	899	841	1008	786	728	2066	647	2073	536	811	672	659	807
ENSMUSG00000000562	Adora3	0	0	0	0	4	2	0	0	0	0	0	0	0	4	0	2	0	0	0	0	0	0	0	0	0	0	0	2	0	4	0	2
ENSMUSG00000000563	Atp5f1	2152	1104	2749	1785	1094	1152	1048	1009	5503	1100	5515	1098	1691	1699	2032	1808	4276	1390	4368	1594	2211	1090	1863	1199	4300	1517	4092	1306	2168	1235	1829	1343
ENSMUSG00000000567	Sox9	1658	269	1335	132	2741	214	3248	222	1016	187	817	121	2966	202	3982	218	791	65	436	268	3046	313	2690	131	2673	110	2028	112	5885	358	4810	373
ENSMUSG00000000568	Hnrnpd	2916	2428	2709	2438	3021	3243	2662	2954	4831	1277	4413	957	1583	2044	1617	1929	4073	1760	3411	1641	1611	1913	1826	1752	4421	2303	4447	2371	2056	1817	1964	1938
ENSMUSG00000000579	Dynlt1c	40	11	43	28	14	12	10	15	53	11	40	0	25	34	29	46	36	19	34	22	20	22	27	27	20	18	24	16	24	33	22	20
ENSMUSG00000000581	C1d	620	602	812	1215	307	303	248	316	1399	270	1296	302	337	543	426	681	868	778	795	677	431	346	348	396	1142	607	905	601	525	394	309	453
ENSMUSG00000000594	Gm2a	371	2477	543	3644	646	1801	520	1828	91	1453	52	2849	1288	1839	1458	2244	101	2636	96	2572	878	1194	943	1307	115	3030	118	2761	778	1453	528	2233
ENSMUSG00000000600	Krit1	1509	1091	1168	1155	995	1137	848	1286	1000	675	950	695	599	1564	812	1665	1017	1645	896	1375	683	1480	715	1503	913	1534	941	1371	935	1241	752	1346
ENSMUSG00000000605	Clcn4	1168	1283	1188	1248	712	1202	543	1043	969	644	819	615	744	2251	979	3142	1056	1509	1071	1534	926	1541	850	1688	983	1401	973	1291	1282	1806	1098	2850
ENSMUSG00000000606	Vmn2r88	0	0	0	0	0	0	0	0	0	0	0	0	0	0	0	0	0	0	0	2	0	0	0	0	0	0	0	0	0	0	0	0
ENSMUSG00000000617	Grm6	0	7	3	0	10	2	0	0	0	32	0	0	0	20	4	9	0	21	0	26	6	23	4	6	0	18	0	19	5	4	0	11
ENSMUSG00000000627	Sema4f	20	19	3	30	76	5	105	5	2	0	0	0	13	12	8	6	16	13	13	22	23	15	34	12	9	23	5	16	29	22	22	6
ENSMUSG00000000628	Hk2	3498	13133	2018	1117	6764	5867	5843	5239	3758	6339	3931	8536	12080	7919	13972	6192	3798	9894	3706	18615	10700	9475	9925	3991	3766	7973	3721	8607	11483	7062	13788	14002
ENSMUSG00000000631	Myo18a	5552	1039	5647	1384	2768	886	3501	819	3761	830	3743	484	5014	1482	6169	2103	3765	912	3715	738	4781	680	5724	666	3883	816	3991	937	7471	752	8277	1639
ENSMUSG00000000632	Sez6	16	0	0	0	0	2	5	0	0	0	0	21	0	0	0	0	0	0	0	0	3	0	0	0	0	0	0	0	0	2	0	0
ENSMUSG00000000673	Haao	0	6	0	8	0	7	10	7	0	11	0	0	0	2	4	6	0	3	0	4	0	2	0	4	0	0	0	0	3	4	0	2
ENSMUSG00000000682	Cd52	73	2	81	4	43	0	24	4	51	21	27	0	42	4	4	8	47	0	68	0	15	4	34	0	60	7	49	4	17	4	26	11
ENSMUSG00000000686	Abhd15	271	290	197	237	261	206	177	237	193	135	198	212	108	225	114	201	178	232	163	238	210	223	131	210	195	292	154	310	172	201	106	210
ENSMUSG00000000690	Hoxb6	995	21	976	16	610	25	1115	28	224	21	207	21	898	94	1309	141	211	7	252	7	838	51	1254	50	134	9	164	4	1078	68	1090	89
ENSMUSG00000000693	Loxl3	93	864	95	1119	119	393	58	402	162	540	138	796	38	742	64	930	173	1027	197	960	60	718	42	741	134	787	139	726	158	1041	47	860
ENSMUSG00000000701	Tcl1b5	0	0	0	0	0	0	0	0	0	0	0	0	5	0	0	0	0	0	0	0	0	0	0	0	0	0	0	0	0	0	0	0
ENSMUSG00000000706	Btn1a1	9	4	5	22	10	2	5	5	2	0	5	21	17	6	29	4	0	0	0	4	6	2	0	6	7	5	7	2	104	2	9	0
ENSMUSG00000000708	Kat2b	1287	2097	1110	1744	979	2094	705	1844	402	1090	404	1269	553	1154	809	1164	201	1346	221	1569	935	1504	943	1373	390	1764	336	1719	1076	1551	676	1111
ENSMUSG00000000711	Rab5b	947	851	1343	1638	544	949	381	892	787	530	992	685	611	900	710	973	858	1211	1117	1143	618	799	629	986	839	1018	781	1096	839	1188	769	956
ENSMUSG00000000724	Cryba1	66	73	33	20	126	58	58	149	19	32	7	111	42	51	39	30	8	53	13	53	37	72	60	66	9	57	26	131	52	30	26	42
ENSMUSG00000000730	Dnmt3l	11	6	9	6	0	5	0	5	42	11	54	31	5	45	4	59	47	51	43	56	3	9	0	21	51	57	34	60	0	79	0	46
ENSMUSG00000000731	Aire	9	0	5	0	4	0	10	4	0	0	0	0	9	2	11	6	6	0	0	2	3	0	4	2	0	2	0	2	5	10	9	4
ENSMUSG00000000732	Icosl	477	864	565	1130	234	833	177	797	144	395	149	353	121	389	110	493	244	575	286	665	165	481	105	591	229	354	248	457	204	506	144	531
ENSMUSG00000000738	Spg7	955	511	994	607	593	492	762	523	805	447	883	594	765	842	1135	923	1079	711	832	669	898	706	936	704	899	650	964	594	1139	763	858	921
ENSMUSG00000000739	Sult5a1	44	58	73	74	10	14	10	22	26	42	20	111	5	131	4	182	11	42	16	132	3	115	0	61	17	34	40	55	5	150	13	171
ENSMUSG00000000740	Rpl13	11572	6873	13375	9114	9337	10541	9786	8869	10445	17450	11842	13841	6451	6056	5786	6028	12475	6387	14643	6841	5699	5632	5758	5705	11080	6979	10586	7187	5296	6790	5064	5673
ENSMUSG00000000743	Chmp1a	918	617	1341	1070	508	532	601	470	2004	789	1953	554	1168	740	1390	992	1831	813	2031	791	1305	641	1396	790	1951	854	1989	967	1439	989	1470	853
ENSMUSG00000000751	Rpa1	712	464	790	801	649	434	715	465	1919	270	1815	292	142	453	227	683	1803	467	1663	409	244	353	210	387	1858	496	1665	475	336	419	229	493
ENSMUSG00000000753	Serpinf1	36	14516	151	15369	455	2145	243	1705	53	11506	54	15200	727	3142	802	2833	57	23052	65	21516	870	6164	1407	8813	60	13758	74	12340	1908	7042	904	3845
ENSMUSG00000000759	Tubgcp3	1210	861	1260	840	1295	1156	1472	1159	1131	613	1181	685	881	891	1061	999	1112	811	1092	818	918	908	1115	966	1015	909	1040	937	1074	912	1065	811
ENSMUSG00000000766	Oprm1	11	6	9	0	7	0	20	0	6	11	7	11	13	2	4	2	6	3	16	2	6	0	4	0	7	2	0	4	10	0	5	0
ENSMUSG00000000776	Polr3d	393	631	443	405	890	974	891	671	680	664	790	453	507	485	568	588	637	1863	617	1041	547	455	577	438	922	1044	754	769	535	510	499	619
ENSMUSG00000000782	Tcf7	211	202	297	252	478	525	477	499	186	208	154	202	146	204	146	250	329	383	298	221	119	353	176	455	212	375	259	406	174	299	119	192
ENSMUSG00000000787	Ddx3x	15036	39023	14295	21616	27245	51711	16758	49829	17358	7927	15210	13106	8798	19296	11150	15759	17105	21779	15769	24814	14103	25683	10987	17779	16871	22954	15276	23040	14478	18383	8953	18365
ENSMUSG00000000791	Il12rb1	3	11	5	30	4	17	5	15	13	11	12	81	9	22	0	27	11	11	13	21	9	23	12	16	3	15	11	21	17	13	22	6
ENSMUSG00000000792	Slc5a5	25	21	11	8	50	15	39	49	42	42	18	11	30	69	11	73	460	9	22	31	20	46	23	44	20	25	38	31	146	54	51	42
ENSMUSG00000000794	Kcnn3	128	1444	23	2031	505	1041	339	1201	6	115	5	151	0	694	11	807	18	849	53	505	71	1964	72	2994	9	165	13	322	230	1530	17	1260
ENSMUSG00000000804	Usp32	1959	1637	1613	1553	1756	1679	1824	1833	1438	706	1438	927	2302	1533	2344	1363	1133	1394	1160	1532	2279	1757	1822	1313	1307	1499	1394	1459	2102	1083	2112	1397
ENSMUSG00000000805	Car4	0	2	0	0	14	0	5	4	0	0	0	0	5	0	0	0	0	3	0	0	0	2	0	2	3	0	3	4	5	0	0	0
ENSMUSG00000000811	Txnrd3	459	258	505	204	439	376	281	460	458	177	455	121	121	270	188	162	370	166	347	231	145	392	131	264	437	128	387	132	134	198	123	221
ENSMUSG00000000817	Fasl	0	4	0	0	0	4	0	4	0	0	3	11	0	4	4	4	0	3	0	9	3	11	0	6	0	7	0	7	0	2	0	2
ENSMUSG00000000823	Zfp512b	1735	967	1509	1318	827	985	1143	1030	920	1048	817	735	486	1066	830	1532	1061	1520	967	1552	654	1132	850	1380	1108	1485	1109	1426	1498	1834	1044	1357
ENSMUSG00000000826	Dnajc5	2762	1845	2835	2180	1905	2122	1810	1837	2629	1588	2481	1470	3074	2134	3120	2210	2496	2291	2390	2040	3924	2259	2915	1887	2887	2182	2683	2147	3028	1977	3024	2066
ENSMUSG00000000827	Tpd52l2	973	906	1176	1386	1035	1252	901	1106	1034	862	1107	675	1097	1162	1004	1300	974	1280	1059	1120	1201	936	779	1009	1057	1131	1145	1157	966	995	959	959
ENSMUSG00000000838	Fmr1	2202	2383	1950	2339	2228	3552	2072	3585	2528	862	2308	886	1126	5886	1138	4719	1962	1944	1737	2121	1438	2582	1213	2248	2500	2469	2387	2352	1489	2471	1111	4528
ENSMUSG00000000861	Bcl11a	1785	93	1659	460	43	15	105	39	974	146	1059	71	9	24	54	2	874	19	1187	27	54	16	60	10	941	89	876	110	125	24	39	6
ENSMUSG00000000869	Il4	29	61	35	55	20	80	15	72	13	0	9	0	5	55	18	46	16	23	19	27	9	44	8	57	20	25	15	26	36	37	5	37
ENSMUSG00000000876	Pxmp4	233	214	301	359	76	98	101	98	169	177	158	151	54	135	68	208	196	228	231	233	60	130	79	227	189	174	171	178	143	193	64	124
ENSMUSG00000000881	Dlg3	804	610	932	865	475	798	520	721	498	218	409	383	441	278	543	452	378	448	344	330	402	453	476	532	710	414	590	377	568	385	545	382
ENSMUSG00000000884	Gnb1l	145	54	157	84	47	60	86	68	126	73	127	41	63	34	36	62	180	65	203	49	32	25	19	44	181	50	150	47	33	35	43	66
ENSMUSG00000000889	Dbh	319	85	0	2	4	0	0	2	0	11	0	31	0	10	4	6	0	0	0	16	9	2	0	8	0	15	0	14	12	15	9	6
ENSMUSG00000000901	Mmp11	104	1141	113	2072	251	1344	101	1064	10	696	16	413	17	887	29	1154	29	377	28	462	145	5011	150	5976	11	563	15	666	347	3465	30	800
ENSMUSG00000000902	Smarcb1	905	589	1136	1031	554	623	510	696	1570	1017	1704	695	574	967	617	1203	1523	805	1737	690	654	746	696	1062	1481	957	1491	872	673	1152	579	947
ENSMUSG00000000903	Vpreb3	3	4	5	10	10	20	5	25	2	11	0	0	5	10	29	6	0	0	0	4	15	15	19	23	5	10	3	7	40	30	51	2
ENSMUSG00000000915	Hip1r	2363	437	2629	411	1905	576	2667	624	2388	509	2465	353	3112	654	3305	595	2229	354	1905	356	3411	467	2810	428	3046	472	3045	581	3797	702	3991	554
ENSMUSG00000000916	Nsun5	376	368	375	367	271	487	196	441	496	301	486	242	187	323	185	396	524	389	519	307	201	373	274	319	553	322	530	300	247	295	157	373
ENSMUSG00000000934	Top1mt	420	118	357	185	178	128	201	122	669	156	739	141	113	172	135	180	799	182	718	145	156	122	173	132	731	166	727	151	153	159	144	189
ENSMUSG00000000938	Hoxa10	112	815	133	1384	169	1412	72	1816	95	447	127	373	9	1287	36	1150	90	885	43	834	66	1450	98	2675	261	631	202	581	497	2377	5	1052
ENSMUSG00000000942	Hoxa4	7	7	3	0	10	5	5	10	0	0	0	0	0	10	0	15	0	3	0	4	0	15	0	14	0	7	3	2	0	8	0	10
ENSMUSG00000000948	Gm38393	220	143	9	70	188	93	210	119	2	52	0	111	50	51	142	46	24	118	10	113	108	90	102	87	11	54	7	57	188	85	89	37
ENSMUSG00000000957	Mmp14	2683	12414	3278	14108	2817	11138	1481	8387	2475	6319	2450	8385	1234	9324	1433	10733	2602	6751	2417	8051	2090	18666	2032	20276	2743	8447	2396	9095	3316	18737	1343	12155
ENSMUSG00000000958	Slc7a7	49	221	75	285	132	234	158	263	20	104	23	222	179	81	142	88	24	147	19	164	230	208	184	276	11	193	30	184	261	181	131	96
ENSMUSG00000000959	Oxa1l	1214	921	1639	1324	656	694	634	703	1061	830	1245	856	457	750	504	823	1264	778	1451	739	725	906	633	1164	1227	949	1258	1007	856	1107	503	768
ENSMUSG00000000976	Heatr6	918	617	1044	816	528	565	529	552	811	260	855	302	395	487	483	785	997	680	1062	566	439	520	565	643	771	698	794	610	593	710	457	637
ENSMUSG00000000982	Ccl3	0	0	0	0	27	4	0	0	2	0	0	21	9	63	18	150	0	0	0	2	12	32	4	2	0	0	0	0	108	26	17	187
ENSMUSG00000000983	Wfdc18	246	9	35	14	7	4	5	4	268	11	89	41	806	8	373	2	42	5	65	684	490	11	255	2	348	2	118	0	263	7	68	0
ENSMUSG00000001014	Icam4	47	56	37	26	73	40	48	51	4	0	3	31	13	24	25	20	8	30	0	34	40	58	49	33	9	15	0	33	17	11	17	24
ENSMUSG00000001016	Ilf2	1028	982	1260	1066	1045	1437	915	1442	1279	820	1201	675	300	902	412	957	1372	953	1442	874	394	1001	401	828	1240	1057	1323	986	455	826	326	901
ENSMUSG00000001017	Chtop	2332	2452	2532	2584	2425	4532	1796	3820	2637	1162	2625	1460	1575	2372	1486	2258	2735	2097	2638	2242	1688	2368	1351	2540	2720	2390	2587	2261	1742	2355	1128	2171
ENSMUSG00000001018	Snapin	918	854	1028	1142	498	474	367	601	720	581	715	554	138	551	217	609	576	891	596	889	224	580	259	700	678	825	668	784	467	840	279	607
ENSMUSG00000001020	S100a4	115	205	181	338	60	12	62	12	413	5509	426	2587	25	1211	4	1614	275	1190	283	1397	6	39	4	53	346	1113	443	1210	31	161	13	706
ENSMUSG00000001021	S100a3	99	7	189	2	14	5	15	0	44	21	63	11	21	40	11	69	42	3	28	4	20	2	12	4	34	5	61	6	5	4	17	28
ENSMUSG00000001023	S100a5	0	6	5	2	4	0	0	0	2	0	0	0	0	2	0	0	3	0	4	2	0	4	0	0	5	0	5	2	0	4	0	2
ENSMUSG00000001025	S100a6	5287	3428	6585	4297	1882	1123	1529	894	11931	15656	12523	9634	1330	5451	447	5881	9188	3913	10435	4285	425	1696	348	1739	11319	4088	11008	4031	596	2373	440	4588
ENSMUSG00000001027	Scn4a	29	34	3	0	80	14	110	18	2	301	5	423	607	116	578	51	21	243	28	157	785	336	300	138	7	58	3	59	427	16	465	58
ENSMUSG00000001029	Icam2	36	61	5	6	162	39	229	33	8	156	9	192	333	71	426	48	3	134	4	123	340	192	333	102	11	73	17	134	404	22	271	57
ENSMUSG00000001034	Mapk7	273	526	255	570	251	421	253	517	277	426	340	484	229	389	259	475	329	615	326	536	221	676	259	821	308	657	378	594	204	776	216	444
ENSMUSG00000001036	Epn2	936	693	886	884	682	914	501	959	611	405	668	413	486	904	539	1177	789	602	657	685	612	757	715	913	710	573	666	699	734	1033	469	936
ENSMUSG00000001039	B9d1	62	63	87	101	66	108	77	104	93	177	98	141	38	168	50	182	134	109	160	75	83	60	83	87	81	79	103	62	127	113	51	125
ENSMUSG00000001052	Sec24b	3113	2712	2687	2370	2781	2931	2734	2888	2153	1474	2103	1541	2198	2452	2603	2433	2530	2412	2292	2082	3058	2477	3068	2198	2188	2340	2348	2432	2327	2239	2078	2526
ENSMUSG00000001053	N4bp3	352	120	443	76	508	373	520	245	268	83	364	131	624	360	394	410	257	80	209	85	445	232	502	181	356	161	366	108	324	179	423	360
ENSMUSG00000001054	Rmnd5b	589	295	708	405	393	446	486	395	616	415	639	433	719	977	756	1133	463	550	485	406	841	441	865	551	678	573	674	541	832	609	904	795
ENSMUSG00000001056	Nhp2	718	179	934	268	455	469	453	311	2553	654	2603	272	561	742	465	888	1580	308	1844	308	572	411	461	270	2068	349	1955	303	582	306	566	538
ENSMUSG00000001062	Vps9d1	407	244	419	250	215	376	262	376	211	177	220	162	175	252	263	322	304	247	264	224	199	264	225	364	250	301	221	232	270	360	224	230
ENSMUSG00000001065	Zfp276	457	363	493	413	442	626	567	583	331	332	307	423	611	260	536	498	416	381	353	374	453	434	633	460	335	438	376	338	399	415	562	366
ENSMUSG00000001076	C1ql4	0	0	0	0	0	2	0	2	0	0	0	0	0	0	0	0	3	0	0	0	0	0	0	0	0	0	3	0	0	0	0	0
ENSMUSG00000001082	Mfsd10	486	557	551	698	264	401	301	340	611	405	679	574	221	610	224	670	684	485	884	446	335	483	304	487	716	493	679	480	375	564	199	527
ENSMUSG00000001089	Luzp1	3495	2017	3464	2450	2998	3203	2391	3071	4155	1411	3663	1380	2248	2308	1929	1971	3886	2260	3206	2156	1795	3128	1901	2527	3959	2332	3972	2388	2182	1685	1745	1992
ENSMUSG00000001095	Slc13a2	462	4	261	0	40	0	58	0	0	0	5	0	34	0	75	0	0	0	0	0	32	0	60	2	0	2	11	0	172	4	81	0
ENSMUSG00000001098	Kctd10	1329	2099	1557	2992	2218	2164	1886	2203	1626	1173	1604	1037	1716	1941	1897	2087	1490	1869	1439	2099	1934	1915	1590	1539	1811	1716	1625	1630	2562	1841	2006	2155
ENSMUSG00000001100	Poldip2	793	476	910	636	419	576	448	564	1174	374	1223	494	308	434	518	565	974	521	1246	499	465	527	479	662	1108	575	1048	572	626	666	495	554
ENSMUSG00000001103	Sebox	0	4	0	0	4	2	0	4	0	0	0	0	0	0	0	2	3	0	0	0	0	0	4	2	3	2	5	0	3	0	5	0
ENSMUSG00000001105	Ift20	437	343	493	446	333	378	305	413	509	571	548	564	225	565	273	649	391	454	464	487	380	346	274	509	384	390	355	435	326	347	305	540
ENSMUSG00000001119	Col6a1	205	26569	533	31263	1747	13104	562	9973	90	58087	131	64836	403	85240	816	81576	437	77786	408	53697	2022	75654	2238	118530	301	66895	359	71535	13958	126047	875	96721
ENSMUSG00000001120	Pcbp3	354	266	191	204	165	346	77	318	44	104	60	182	304	198	188	204	75	268	86	206	337	199	326	189	85	237	95	269	136	250	233	286
ENSMUSG00000001123	Lgals9	209	988	289	1376	142	815	62	651	149	1245	109	1470	740	979	578	1351	101	1597	43	1443	1141	1259	1175	1808	151	1531	129	1469	340	1466	288	1061
ENSMUSG00000001127	Araf	1864	1064	1441	1028	1368	1080	1586	1177	847	913	863	776	931	1031	1163	1414	969	1520	884	1293	1011	1206	1130	1495	807	1366	884	1419	1219	1198	984	1187
ENSMUSG00000001128	Cfp	47	51	25	37	99	77	167	107	8	11	23	31	187	65	171	64	18	69	28	41	213	76	128	93	28	52	24	35	78	57	51	49
ENSMUSG00000001131	Timp1	80	338	55	214	165	221	139	200	91	1401	52	1198	117	766	117	535	52	299	43	494	114	455	68	215	66	459	57	380	52	410	39	536
ENSMUSG00000001134	Uxt	84	95	117	113	175	156	234	120	266	125	205	41	96	102	82	155	175	105	215	107	94	101	143	70	187	102	210	100	118	124	102	105
ENSMUSG00000001138	Cnnm3	901	982	1018	1093	524	787	510	947	562	332	662	333	250	368	355	449	702	506	599	482	303	578	427	619	604	600	624	533	432	644	313	418
ENSMUSG00000001143	Lman2l	631	281	641	384	617	636	501	620	177	249	185	212	358	547	383	595	345	345	313	334	408	506	528	589	202	324	244	329	722	614	402	547
ENSMUSG00000001150	Mcm3ap	1228	1066	1339	1407	1130	1364	1267	1192	1607	312	1615	514	574	924	745	1324	1490	1229	1393	1009	564	1006	771	1269	1386	1149	1588	1077	968	1220	782	1035
ENSMUSG00000001151	Pcnt	2830	2213	2498	2339	2422	2524	3291	2710	1283	851	1325	786	1625	1129	1557	1356	2037	1344	1648	1217	1390	1331	1650	1239	1439	1600	1791	1503	1859	1314	1842	1288
ENSMUSG00000001155	Ftcd	0	91	0	35	20	60	5	81	0	73	0	61	5	61	4	48	0	120	0	76	0	67	0	33	0	115	0	88	15	84	0	98
ENSMUSG00000001156	Mxd1	813	1271	688	781	1249	1940	986	2198	898	550	948	1208	14090	848	8101	999	404	621	326	736	8306	1254	4953	883	1468	895	1978	913	2269	680	5444	976
ENSMUSG00000001157	Gmcl1	762	392	664	539	261	262	305	334	733	312	779	252	399	428	468	498	568	456	715	383	487	409	494	483	678	425	700	380	530	579	503	494
ENSMUSG00000001158	Snrnp27	365	269	469	394	290	336	286	280	584	229	657	182	287	252	270	361	481	285	405	314	258	185	274	266	420	333	433	285	326	266	288	283
ENSMUSG00000001166	Oas1c	123	19	123	22	30	7	39	28	93	11	78	11	71	18	47	18	78	5	89	6	51	9	72	12	119	15	72	6	73	2	39	13
ENSMUSG00000001168	Oas1h	5	0	7	2	0	2	10	0	2	0	3	0	13	2	0	2	0	0	0	0	29	8	0	4	0	0	3	0	0	0	0	0
ENSMUSG00000001173	Ocrl	1133	962	954	1217	966	1017	901	968	1212	581	1176	886	387	902	546	937	1331	1037	1313	1046	445	708	625	815	1168	1139	1147	1231	736	1300	511	1028
ENSMUSG00000001175	Calm1	5651	5191	5445	4550	5575	7741	4124	9047	12509	4628	12716	4701	8948	9094	7619	8725	8837	5114	9812	5934	8283	4804	5578	4564	11084	5855	10571	5770	6571	5399	6576	7454
ENSMUSG00000001211	Agpat3	1052	1104	1218	1243	712	1232	748	1148	858	1235	906	906	304	815	444	983	1028	1434	1145	1263	470	1066	487	1284	774	1213	756	1257	624	1334	427	918
ENSMUSG00000001225	Slc26a3	0	9	0	0	4	4	0	5	0	0	0	0	5	18	8	15	0	3	0	0	3	4	0	6	3	4	24	4	0	2	0	8
ENSMUSG00000001227	Sema6b	11	143	7	37	221	242	220	216	2	52	5	51	34	41	68	62	0	40	7	76	49	115	83	114	3	92	5	95	97	120	55	107
ENSMUSG00000001228	Uhrf1	341	49	453	125	373	57	415	80	2608	249	2512	101	300	149	203	180	2627	32	2479	48	402	99	419	53	2832	267	2692	319	174	37	93	93
ENSMUSG00000001229	Dpp9	778	745	884	698	557	732	596	666	907	664	1025	645	781	783	1124	841	1030	889	890	734	915	739	1239	924	966	822	991	791	989	976	938	789
ENSMUSG00000001240	Ramp2	2437	784	2849	966	442	600	701	518	1345	4005	1402	3544	702	1716	883	1396	1241	5206	1350	4495	736	1769	823	3037	1377	3414	1357	3435	1107	3246	786	1319
ENSMUSG00000001247	Lsr	1388	74	1723	134	1200	75	1415	70	1646	177	1524	101	3290	904	2454	1106	1392	40	1396	56	3018	165	2585	123	1515	58	1495	48	2255	134	2133	912
ENSMUSG00000001248	Gramd1a	764	861	760	706	1773	1224	2424	1116	264	1038	240	1027	540	1226	493	1148	399	1204	381	901	680	2461	730	1740	291	849	297	928	727	1543	630	1390
ENSMUSG00000001249	Hpn	350	21	437	24	416	24	443	28	71	21	65	0	295	6	316	11	44	9	56	24	408	30	363	19	39	25	63	21	415	19	317	15
ENSMUSG00000001260	Gabrg1	0	2	0	0	0	2	5	0	0	0	0	0	0	0	0	0	0	3	0	0	3	4	0	2	0	0	0	0	3	0	0	0
ENSMUSG00000001270	Ckb	132	693	43	832	1025	1824	777	2541	35	1142	36	987	437	3052	639	2412	60	908	47	865	468	3151	487	3650	87	800	72	935	1779	5413	347	2969
ENSMUSG00000001280	Sp1	4962	5171	5227	6630	4020	8874	2820	7199	3667	1515	4042	1903	1895	3237	1915	2683	4032	3792	3923	3494	2455	3477	1867	3516	3777	3438	3760	3577	2866	3888	1821	3215
ENSMUSG00000001281	Itgb7	40	58	41	28	63	32	43	47	50	11	16	0	17	16	11	15	26	36	16	19	26	27	15	12	30	21	34	33	40	18	17	22
ENSMUSG00000001285	Myg1	299	205	385	328	211	212	220	243	377	229	409	333	216	227	220	292	409	318	464	265	173	211	240	259	358	298	385	267	237	219	178	285
ENSMUSG00000001288	Rarg	2604	2276	2789	2818	676	1027	558	1001	2927	2407	3113	1953	852	1035	766	1516	3007	3012	3031	2432	728	1022	809	1318	3372	2723	2984	2244	750	1825	507	1395
ENSMUSG00000001289	Pfdn5	1456	943	1765	1524	1035	1128	1086	1061	992	1930	1079	1571	819	863	663	1039	951	874	1145	1190	711	808	569	902	935	901	1006	985	767	788	672	827
ENSMUSG00000001300	Efnb2	2758	893	2717	820	4988	1735	4553	1868	1045	1733	1267	1782	4383	3628	4864	2040	1259	1244	1114	2116	5217	3414	5069	3533	2614	1359	1869	1620	4863	1904	3991	1764
ENSMUSG00000001305	Rrp15	437	239	479	326	386	576	281	389	860	83	759	91	221	346	206	285	655	253	592	241	207	316	203	191	680	259	737	240	179	170	178	243
ENSMUSG00000001313	Rnd2	284	1019	355	1196	145	658	105	528	382	976	380	866	200	653	132	596	342	972	405	1029	233	1157	161	1058	414	798	450	846	211	1185	123	728
ENSMUSG00000001323	Srr	1054	994	1002	1279	1012	1449	762	1332	1172	550	1243	604	395	1043	458	1126	1315	1259	1135	1178	654	1092	592	947	1153	862	1153	810	804	877	507	1003
ENSMUSG00000001333	Sync	88	86	59	121	162	221	48	219	60	73	54	31	30	574	71	725	44	176	62	142	37	162	27	236	60	110	59	101	183	231	34	514
ENSMUSG00000001334	Fndc5	33	380	43	685	383	78	296	90	4	42	0	31	42	114	15	159	18	161	7	95	40	271	83	517	5	66	15	54	75	368	17	209
ENSMUSG00000001348	Acp5	266	59	431	198	76	2	20	9	882	166	954	91	968	362	1053	523	1156	61	1184	105	1087	95	943	53	1083	70	1182	113	889	101	765	406
ENSMUSG00000001349	Cnn1	11	48	33	142	709	1406	348	2142	11	42	7	41	162	947	610	502	8	19	4	31	159	815	199	834	7	31	13	18	1699	841	55	344
ENSMUSG00000001366	Fbxo9	631	316	706	508	300	345	372	332	1087	415	1003	323	424	412	444	523	1020	579	1013	494	425	444	401	462	966	573	958	531	561	377	397	324
ENSMUSG00000001376	Vps50	865	557	892	791	593	381	715	402	992	281	1068	323	516	504	685	665	825	732	832	534	620	536	648	655	797	652	758	697	713	595	583	483
ENSMUSG00000001380	Hars	828	636	862	814	452	687	520	603	1877	561	1751	635	420	897	571	978	1433	893	1411	830	669	673	569	672	1483	935	1556	933	685	703	600	793
ENSMUSG00000001383	Zmat2	835	634	978	1144	554	993	520	789	1227	343	1165	323	470	733	678	770	1053	646	1049	658	550	448	524	758	1070	657	960	618	643	650	571	585
ENSMUSG00000001403	Ube2c	47	16	65	32	80	12	96	31	1299	229	1378	91	59	43	86	74	1454	17	1436	26	156	36	173	6	1216	76	1300	81	61	26	47	29
ENSMUSG00000001415	Smg5	1221	841	1200	778	1335	1379	1739	1161	1643	1173	1524	755	1608	1068	1532	1152	1865	958	1884	899	1637	1127	1916	1116	1591	977	1732	1044	1624	1144	1740	1117
ENSMUSG00000001416	Cct3	2147	1308	2783	1584	1845	2291	1705	1922	6148	1328	5584	1158	1841	2884	1940	2998	5249	1587	5528	1641	2143	2068	2006	1799	5090	1695	5075	1638	2206	1620	1559	2624
ENSMUSG00000001418	Glmp	789	624	962	781	317	322	415	374	1081	996	1092	977	918	879	1061	881	1102	793	1197	832	1308	941	1097	985	1125	814	1046	836	1165	1023	1124	827
ENSMUSG00000001419	Mef2d	1765	2790	1517	1715	2778	5376	2405	4050	1094	2345	1041	1883	2414	2302	2432	2082	1017	2761	1007	2686	3230	2740	2353	2234	1371	2922	1355	2954	2709	2446	2686	2444
ENSMUSG00000001420	Tmem79	442	101	615	146	132	44	191	62	1109	198	1101	192	312	59	398	101	1033	61	1206	90	366	83	382	89	979	144	933	89	380	88	448	80
ENSMUSG00000001424	Snd1	2885	2272	3542	2944	2732	3070	3615	2784	4077	2791	4131	3030	3519	3386	4397	2885	3937	2901	4193	2407	4326	2668	4721	3117	4383	3176	4308	3379	4739	4172	4954	2891
ENSMUSG00000001435	Col18a1	1118	1375	1286	1495	663	8576	562	5731	6826	1401	6418	1661	167	2779	110	2945	8061	1171	7604	1510	173	9603	274	12845	7147	1203	7168	1546	701	3557	119	2909
ENSMUSG00000001436	Slc19a1	312	167	409	250	145	389	234	321	407	63	375	151	142	258	160	248	532	197	562	176	136	358	135	408	447	144	452	168	150	226	72	243
ENSMUSG00000001440	Kpnb1	5504	4186	5587	5415	4079	5761	3124	5288	11726	2760	10644	2608	3174	5078	3670	5042	10575	4569	9935	4044	4354	4484	3696	4357	9835	4043	9870	3942	3994	4757	3155	4950
ENSMUSG00000001441	Npepps	2876	1723	2705	1830	3087	1750	3105	1679	2838	1266	2816	1289	3523	2019	2798	1883	2645	1913	2562	1693	3952	2047	2971	1708	2559	2015	2803	1878	2595	1825	2682	1815
ENSMUSG00000001444	Tbx21	5	7	5	0	7	4	5	4	0	11	0	0	0	0	0	0	0	0	0	2	0	6	0	8	0	2	0	0	3	0	0	8
ENSMUSG00000001445	Mrpl10	490	389	627	568	254	303	281	319	1076	426	1099	423	362	494	376	632	907	469	933	433	439	380	367	485	903	486	933	487	575	543	397	521
ENSMUSG00000001467	Cyp51	1105	505	1379	307	1803	1505	1220	976	3047	332	2909	333	2223	485	1614	357	2722	276	3200	487	2472	502	2327	489	1720	332	1739	300	921	390	1208	366
ENSMUSG00000001472	Tcf25	4431	3848	4027	3595	4458	5376	5643	4556	4014	2947	3889	3151	4528	3704	5701	4722	3845	3982	3503	4187	5022	3752	5342	4099	3711	3956	3847	3861	5369	3810	6470	4300
ENSMUSG00000001473	Tubb6	211	3316	197	853	1717	8012	1062	5320	197	3030	123	2869	686	2347	465	1686	137	1875	148	2590	524	2882	412	2040	212	2406	282	2569	647	3179	343	2832
ENSMUSG00000001482	Def8	345	264	395	421	139	206	120	182	580	239	522	262	196	221	270	378	586	293	632	308	199	213	232	323	549	258	559	295	221	343	203	301
ENSMUSG00000001493	Meox1	11	17	0	26	0	5	0	20	0	0	0	21	0	2	0	6	0	11	0	22	0	41	0	19	0	26	0	18	8	15	0	6
ENSMUSG00000001494	Sost	0	0	0	4	14	4	0	4	0	0	0	0	0	0	0	0	0	3	0	2	0	6	0	10	0	0	0	2	5	0	0	0
ENSMUSG00000001496	Nkx2-1	9	6	0	0	0	0	0	0	0	0	0	0	0	0	0	0	0	0	0	0	0	0	0	0	0	0	0	0	0	0	0	0
ENSMUSG00000001497	Pax9	58	4	39	10	14	4	5	10	37	21	49	0	34	0	15	0	29	0	22	7	34	6	15	0	238	2	137	6	12	2	13	0
ENSMUSG00000001504	Irx2	732	59	547	152	7	2	58	7	776	63	914	21	5	8	11	4	604	5	384	34	15	4	0	4	803	33	733	84	80	15	0	6
ENSMUSG00000001506	Col1a1	376	89007	1174	63788	1859	8538	781	11208	126	100011	123	133667	478	93932	745	93036	242	130374	240	96220	5002	147364	6435	266654	291	71765	307	78470	13264	121525	1221	98275
ENSMUSG00000001507	Itga3	4345	612	4433	1345	5512	494	4877	496	11379	1318	10589	383	5035	1701	3340	2657	10162	245	8398	256	4997	632	4276	875	11944	666	12208	642	2013	460	2885	1857
ENSMUSG00000001508	Sgca	0	9	9	12	14	5	15	12	0	21	0	11	0	41	4	29	3	34	0	11	6	41	4	17	0	7	0	18	24	18	0	11
ENSMUSG00000001510	Dlx3	16	2	33	22	7	9	5	9	20	73	20	21	0	2	11	6	85	9	59	6	6	0	4	8	28	31	24	16	5	4	5	4
ENSMUSG00000001517	Foxm1	198	165	187	95	248	277	234	243	860	218	857	21	108	137	107	175	1120	69	881	107	170	176	195	125	888	150	1012	146	136	93	85	134
ENSMUSG00000001518	Itfg2	391	241	433	301	452	398	501	392	219	218	267	182	208	258	259	257	327	249	335	199	252	265	244	323	233	211	219	199	338	335	237	263
ENSMUSG00000001520	Nrip2	95	69	69	74	99	118	110	157	33	21	56	31	59	133	36	157	72	61	40	41	43	116	42	129	24	36	47	47	61	93	51	133
ENSMUSG00000001521	Tulp3	512	621	573	710	241	558	272	607	655	716	735	534	30	526	47	596	535	661	589	648	54	574	98	615	755	665	572	581	167	675	60	540
ENSMUSG00000001524	Gtf2h4	108	100	193	99	86	82	96	96	282	63	253	101	59	125	86	145	250	84	273	95	83	69	124	110	223	110	185	120	113	118	131	102
ENSMUSG00000001525	Tubb5	6797	7928	8013	11261	3792	9647	2843	7880	16616	7335	16563	7258	2551	8254	3599	8110	18086	5453	19434	5312	2992	6866	3940	7827	16547	8156	16455	7740	5660	10810	3037	7716
ENSMUSG00000001542	Ell2	1568	1745	1311	1097	2125	1440	2172	1481	3514	1256	3171	1732	3240	2119	2592	897	3619	1635	3681	2133	3564	1139	2204	557	2773	1903	2644	2198	1948	601	2505	1352
ENSMUSG00000001552	Jup	10186	1578	12236	2566	4418	846	5472	891	29779	4368	31219	2316	12105	1182	9126	1535	30928	711	35892	743	9608	581	7576	432	29426	2084	30464	1981	8284	685	9684	1386
ENSMUSG00000001555	Fkbp10	123	936	139	1256	145	434	101	357	655	1609	502	1480	5	1718	11	1836	635	1597	810	1406	32	873	30	1650	594	1327	563	1265	225	1654	26	1690
ENSMUSG00000001558	Klhl10	14	22	13	16	17	7	20	31	6	11	3	0	5	14	11	11	0	7	0	17	3	15	4	16	11	13	7	36	10	7	0	8
ENSMUSG00000001566	Mnx1	0	0	0	0	7	0	0	4	0	0	0	0	0	0	0	0	0	0	0	4	0	0	0	0	0	0	0	0	0	0	5	0
ENSMUSG00000001569	Nom1	802	575	854	725	481	810	510	805	1000	291	997	242	254	414	401	489	889	527	804	598	377	467	356	402	901	525	964	511	464	371	431	344
ENSMUSG00000001576	Ergic1	2235	1563	2542	1810	1328	942	1281	772	1550	893	1753	1148	254	1172	231	1428	1521	1499	1697	1320	196	825	382	1375	1564	1081	1583	1043	315	1503	47	1325
ENSMUSG00000001583	Tnk1	1265	105	1102	157	1048	65	1381	70	551	83	477	121	1670	88	1986	127	558	72	445	80	1492	72	1897	117	680	107	727	122	1585	139	2154	87
ENSMUSG00000001588	Acap1	3	16	9	6	14	5	20	13	6	0	5	0	13	8	15	6	3	3	7	6	12	8	8	10	0	0	3	6	19	4	5	2
ENSMUSG00000001604	Tcea3	77	96	95	140	40	34	34	62	2	83	7	81	0	43	0	108	29	72	16	86	3	39	0	25	9	50	13	62	12	33	5	93
ENSMUSG00000001622	Csn3	62	51	41	86	50	12	43	10	10	94	23	81	63	8	64	13	60	23	22	9	12	18	15	19	28	5	49	7	408	8	30	6
ENSMUSG00000001627	Ifrd1	3585	22160	2076	4103	15817	18265	16463	23689	1946	17367	2128	23253	13559	26297	12238	17947	4117	17464	2632	20863	12600	25945	12177	19451	8502	27644	6129	27731	15832	16756	14794	26234
ENSMUSG00000001630	Stk38l	811	325	922	539	877	519	824	721	1319	218	1378	252	698	555	632	574	1066	412	1234	386	745	836	565	572	1212	468	1157	428	736	556	600	485
ENSMUSG00000001632	Brpf1	1149	1014	1226	818	1420	1606	1658	1442	1018	799	1114	615	2069	694	2383	887	1153	983	933	864	2101	1148	2275	947	1305	1178	1174	1017	1817	962	2513	929
ENSMUSG00000001642	Akr1b3	552	826	702	836	640	575	401	672	1023	727	965	685	1326	1898	901	2012	966	826	1120	850	2112	687	1362	722	865	724	920	800	804	630	1149	1544
ENSMUSG00000001655	Hoxc13	0	2	0	0	0	4	0	0	0	0	0	0	0	0	0	0	0	0	0	2	0	2	0	2	0	4	0	0	0	0	0	0
ENSMUSG00000001656	Hoxc11	9	31	0	55	7	12	0	23	0	135	0	101	0	20	0	11	0	26	0	118	0	44	0	66	0	66	0	55	3	26	0	13
ENSMUSG00000001657	Hoxc8	9	51	0	64	4	2	10	12	8	11	5	0	0	194	0	312	0	3	0	6	0	36	8	14	0	13	5	30	15	32	0	236
ENSMUSG00000001661	Hoxc6	5	26	0	39	30	27	10	80	0	0	3	61	0	317	4	387	0	5	0	41	3	94	0	83	3	18	3	26	31	143	17	339
ENSMUSG00000001663	Gstt1	148	1694	223	2213	86	479	81	489	2	810	7	917	9	459	18	679	11	1503	16	1554	17	667	30	681	5	1036	21	1098	64	680	5	657
ENSMUSG00000001665	Gstt3	624	271	938	405	93	105	139	102	169	125	207	141	175	163	249	294	188	337	200	317	292	123	195	134	240	192	257	220	352	189	203	234
ENSMUSG00000001666	Ddt	126	90	229	161	73	67	67	72	209	281	284	222	133	143	139	169	214	149	197	191	125	94	113	157	250	193	252	221	115	170	157	133
ENSMUSG00000001670	Tat	0	0	0	0	0	0	0	0	0	0	0	0	0	6	0	2	0	0	0	0	0	0	4	0	0	0	0	0	0	0	5	8
ENSMUSG00000001672	Marveld3	519	17	611	39	300	10	401	7	233	21	302	11	611	18	507	39	183	3	197	2	719	11	573	4	363	20	284	33	523	16	596	28
ENSMUSG00000001674	Ddx18	923	486	782	667	501	619	372	514	1679	447	1644	484	287	549	415	644	1390	515	1439	526	343	469	464	419	1377	507	1323	528	481	441	317	523
ENSMUSG00000001687	Ubl3	2005	2089	2290	1876	2254	1513	1629	1672	1136	1328	1081	1641	2792	2154	3326	1693	1015	2145	1074	1836	2656	1757	2290	1771	1174	1924	1138	1868	3335	1497	3214	1802
ENSMUSG00000001700	Gramd3	1377	328	1383	471	2870	240	3286	206	449	166	440	272	727	250	954	220	355	287	344	337	2016	399	1448	362	348	364	343	286	971	270	1010	223
ENSMUSG00000001707	Eef1e1	244	66	283	128	205	115	143	104	896	104	775	131	246	231	256	192	668	109	715	132	199	99	225	91	636	150	716	98	251	118	224	158
ENSMUSG00000001729	Akt1	2778	1961	3538	2434	1931	2165	2015	1758	4115	2376	4107	2285	2862	2755	2510	3073	4186	2692	3979	2653	2718	2271	2615	2289	4218	3057	4248	2720	2416	3075	2247	2976
ENSMUSG00000001739	Cldn15	18	21	7	10	63	35	24	52	2	83	0	51	9	2788	11	3341	3	36	0	73	23	369	15	615	7	42	15	52	118	714	60	3173
ENSMUSG00000001741	Il16	58	636	47	685	221	543	101	557	13	1235	7	1480	38	1447	39	2027	13	2347	25	1880	63	795	30	898	11	1568	19	2153	188	799	81	1426
ENSMUSG00000001750	Tcirg1	1155	647	930	371	1091	457	1391	632	458	571	484	453	2347	551	2546	769	789	669	599	670	2721	876	3622	886	515	587	622	668	2325	710	2614	617
ENSMUSG00000001751	Naglu	224	543	321	857	126	103	81	179	162	934	231	1178	204	725	245	844	273	770	310	896	261	457	251	540	229	1190	242	1140	371	917	224	891
ENSMUSG00000001755	Coasy	391	163	521	237	152	174	201	185	560	187	573	212	216	207	220	315	560	230	675	223	176	188	307	215	579	185	471	228	340	292	283	250
ENSMUSG00000001761	Smo	1675	2067	2180	3093	959	2329	829	2104	3114	1546	3077	1702	611	3128	568	3810	3578	2024	3948	1911	736	2552	1037	3262	3150	2012	3380	1953	1081	2947	537	3166
ENSMUSG00000001763	Tspan33	170	4	149	4	80	20	81	28	8	0	9	0	827	10	784	20	8	3	10	2	841	13	659	4	13	2	17	4	699	24	630	8
ENSMUSG00000001767	Crnkl1	892	615	1078	890	607	557	486	518	1272	229	1307	272	549	885	486	901	1074	663	1080	588	504	571	479	558	1038	764	1006	665	607	534	604	684
ENSMUSG00000001768	Rin2	2955	7177	3366	11274	1588	4077	1724	3702	2406	1546	3246	1661	1496	2911	1071	2875	2568	1587	2433	2518	1928	4737	1381	5982	2612	2036	2440	2393	1742	2787	1052	2452
ENSMUSG00000001773	Folh1	3	19	0	8	0	0	0	2	0	0	0	0	0	8	0	0	0	3	0	17	0	0	4	0	0	4	0	2	0	5	0	2
ENSMUSG00000001774	Chordc1	1034	597	1018	909	551	656	686	615	1639	415	1553	443	611	758	848	943	1400	964	1187	727	751	762	621	796	1439	886	1409	688	814	694	604	663
ENSMUSG00000001783	Rtcb	1959	1230	2500	1979	1776	1377	1772	1316	2379	550	2405	604	889	1082	1082	1263	2432	1177	2347	1219	1348	1050	1355	1039	2447	1144	2304	1096	1224	1039	1014	995
ENSMUSG00000001785	Pwp1	808	370	806	642	505	442	501	391	1445	322	1458	242	499	594	483	595	1248	446	1255	399	538	483	464	391	1168	431	1208	464	495	336	393	541
ENSMUSG00000001786	Fbxo7	677	439	625	483	402	333	401	306	542	332	471	252	200	576	281	589	406	341	470	324	354	295	360	329	494	375	496	404	392	273	275	521
ENSMUSG00000001794	Capns1	3974	3008	4121	3644	1954	2104	1929	1808	7856	5146	7814	5124	5164	5469	4053	5839	5198	4400	5509	4438	4082	2796	3566	3869	7145	4427	6788	4591	3621	5314	4084	5198
ENSMUSG00000001802	Lrp3	101	473	75	510	93	530	39	418	2	675	3	514	13	496	25	540	6	556	0	593	20	952	15	1026	7	425	15	545	148	1149	5	641
ENSMUSG00000001804	Dsg4	0	0	0	0	0	0	0	0	11	0	18	0	5	0	4	0	8	0	16	0	0	0	0	0	5	0	7	0	0	0	0	0
ENSMUSG00000001815	Evx2	25	1654	33	2000	0	2	0	0	2	747	5	685	0	0	0	0	3	1461	4	1453	0	0	0	0	24	732	30	805	0	2	0	2
ENSMUSG00000001819	Hoxd13	117	3206	171	3116	4	2	24	7	79	1256	58	1299	0	2	0	0	57	2157	68	1954	3	4	0	8	276	1588	221	1549	15	2	0	0
ENSMUSG00000001823	Hoxd12	7	111	9	123	4	5	0	0	4	32	0	51	0	0	0	4	0	46	0	44	0	9	0	0	0	47	3	52	0	0	0	4
ENSMUSG00000001827	Folr1	42	2	3	0	20	7	43	2	0	21	3	11	42	619	57	969	0	3	0	6	66	23	38	46	9	4	3	2	120	52	72	558
ENSMUSG00000001829	Clpb	589	533	593	683	455	691	491	633	527	332	608	403	266	481	249	595	789	617	810	588	264	497	225	483	608	486	639	581	518	543	233	567
ENSMUSG00000001833	Sept7	3034	5182	2809	6864	2755	3855	2062	4025	4917	1494	4637	2275	3294	5115	3195	4930	3937	5994	3724	5954	3737	4032	2769	4478	3798	4916	3746	5030	3368	4218	2500	4557
ENSMUSG00000001844	Zdhhc4	367	313	511	543	234	386	243	336	480	332	482	222	275	348	270	401	429	341	510	335	295	230	318	329	460	362	477	415	352	338	313	330
ENSMUSG00000001847	Rac1	5884	4559	6607	5901	3957	4545	3715	3650	11050	3279	10901	3453	5828	6423	5247	5821	8754	4960	9021	4953	6825	4110	4153	4131	9847	5303	9565	5087	5702	5277	4350	5351
ENSMUSG00000001855	Nup214	2314	1637	2190	1713	2076	2754	2191	2472	2092	1028	2052	635	981	1018	1326	1233	2538	1332	2528	1184	1221	1229	1426	1320	2072	1350	2274	1371	1608	1420	1158	1205
ENSMUSG00000001864	Aif1l	16	247	5	233	129	118	129	141	4	115	14	192	104	180	224	64	11	266	7	243	131	397	371	483	9	115	3	96	29	190	47	105
ENSMUSG00000001865	Cpa3	0	2	3	0	20	2	0	2	0	0	0	0	0	0	11	0	0	3	0	0	0	4	0	2	0	0	0	0	5	15	0	0
ENSMUSG00000001870	Ltbp1	12779	2565	12889	3242	2129	5210	1691	8109	1452	7076	1021	5980	2842	8440	2840	7066	3906	6527	3396	8938	2356	8201	3345	7047	2131	7217	1924	9607	3471	9365	2222	9002
ENSMUSG00000001891	Ugp2	1129	1518	1098	1533	1177	1192	1039	1096	1603	1277	1478	1369	1288	1677	1521	1755	1264	1574	1157	2351	1388	1289	1126	1322	1475	2010	1302	2131	1863	1511	1259	1793
ENSMUSG00000001901	Kcnh6	7	11	15	4	10	12	5	13	2	11	0	0	13	6	0	0	3	9	0	11	3	13	4	10	0	2	3	14	3	21	0	0
ENSMUSG00000001909	Trmt1	854	489	1018	518	781	861	991	884	811	353	824	282	503	522	646	551	945	444	881	524	589	662	666	632	714	491	836	499	643	586	600	554
ENSMUSG00000001910	Nacc1	1744	730	1970	888	1236	1273	1143	951	2891	1380	2973	786	1434	1322	1263	1634	3136	1125	2976	977	1758	952	1415	1096	2754	1104	2889	1072	1559	1478	1352	1647
ENSMUSG00000001911	Nfix	10918	17453	11214	19295	6929	6849	6891	7005	5867	10365	6145	8647	2003	5617	2649	7048	7881	13499	7417	13324	3069	4793	3307	5786	6918	9349	6676	9879	3989	7608	2277	7985
ENSMUSG00000001918	Slc1a5	1182	1904	1301	1146	2102	1146	3453	1799	889	1443	817	1500	3016	1119	6843	1613	935	2364	1019	2390	5489	1594	5081	706	886	1647	1012	1631	4608	904	6694	1773
ENSMUSG00000001924	Uba1	4426	3845	5884	4818	3532	4947	3053	3799	9691	3455	9859	3685	5945	5752	6134	6362	10321	4617	10441	4302	8240	4581	6263	4826	9085	4789	9653	4604	7741	5753	6859	5578
ENSMUSG00000001930	Vwf	40	27	21	55	389	138	715	175	15	52	7	41	30	38	11	60	26	44	47	17	54	169	34	159	28	10	11	23	1360	248	22	17
ENSMUSG00000001942	Siae	545	642	746	1035	518	591	439	585	544	633	535	776	378	1064	458	1254	576	657	559	790	691	725	603	753	509	692	460	668	694	895	444	943
ENSMUSG00000001943	Vsig2	7	17	5	6	53	25	110	30	0	0	0	31	5	45	4	66	0	11	10	12	0	62	4	31	3	12	5	9	19	18	13	48
ENSMUSG00000001946	Esam	53	49	47	39	257	125	515	167	11	32	7	61	17	922	11	1242	18	28	25	24	20	378	12	247	13	26	47	35	207	211	17	948
ENSMUSG00000001948	Spa17	16	16	15	10	40	7	29	17	17	0	9	11	17	28	25	15	21	11	16	21	17	16	30	27	5	10	11	7	26	24	17	19
ENSMUSG00000001962	Fam50a	468	466	648	644	383	474	362	379	685	291	670	363	453	453	589	531	607	508	504	583	533	427	476	477	610	594	553	546	572	459	465	408
ENSMUSG00000001964	Emd	635	657	764	760	900	1740	986	1498	1131	882	1021	645	324	610	341	646	999	713	1175	766	479	518	457	607	1093	792	1040	779	589	686	347	597
ENSMUSG00000001983	Taco1	121	44	175	97	43	27	53	22	297	11	269	21	38	61	93	92	221	86	316	51	51	50	98	46	200	79	196	71	108	46	64	67
ENSMUSG00000001985	Grik3	36	145	7	90	113	454	91	696	10	11	0	11	0	41	0	41	3	17	4	86	0	71	0	59	26	5	21	31	64	38	5	40
ENSMUSG00000001986	Gria3	99	1446	47	2027	63	292	10	258	17	343	16	282	5	635	0	704	57	713	56	704	9	460	23	577	30	423	30	444	92	626	30	878
ENSMUSG00000001988	Npas1	7	9	9	6	7	5	0	4	10	0	12	0	5	4	4	6	3	0	4	16	3	11	0	10	0	2	3	4	5	15	5	8
ENSMUSG00000001995	Sipa1l2	573	521	549	343	3104	3193	2934	3768	1312	457	1447	604	2376	3964	1681	4845	1829	464	1684	664	2664	3338	1979	1226	1979	665	1957	582	1322	1856	2091	4803
ENSMUSG00000001998	Ap4e1	784	600	702	737	468	548	467	653	633	249	579	242	291	762	206	865	642	538	592	487	227	466	274	528	558	565	588	517	408	466	207	670
ENSMUSG00000001999	Blvra	238	133	271	229	73	82	134	67	351	187	360	162	46	127	96	215	316	220	375	165	80	78	98	93	367	200	328	214	158	104	98	136
ENSMUSG00000002006	Pdzd4	378	333	439	561	155	532	86	515	253	177	260	192	30	233	50	234	342	383	479	342	49	309	64	410	348	374	343	362	108	402	43	239
ENSMUSG00000002007	Srpk3	27	56	15	24	40	88	20	102	15	0	18	0	5	43	22	66	24	17	7	22	12	36	8	34	0	21	15	12	33	22	13	35
ENSMUSG00000002010	Idh3g	1557	936	1996	1498	778	876	815	1033	1794	1069	1840	1047	661	1023	724	1286	2165	1292	2022	1138	912	946	767	1105	1788	1287	1779	1231	1078	1279	761	1189
ENSMUSG00000002012	Pnck	51	43	31	78	47	113	48	195	2	11	0	11	5	43	36	30	0	19	10	17	9	51	15	50	3	5	0	21	68	33	9	33
ENSMUSG00000002014	Ssr4	802	476	1060	473	495	408	548	331	1365	3590	1445	2326	1334	910	1390	922	1241	1045	1632	1242	1569	611	1272	751	1172	1493	1210	1649	1292	797	1297	793
ENSMUSG00000002015	Bcap31	1362	896	1785	1152	910	1018	853	944	1532	872	1267	856	1396	1599	1415	1628	1521	1091	1648	1062	1685	941	1381	1173	1381	941	1329	926	1610	1193	1542	1374
ENSMUSG00000002017	Fam98a	789	414	924	741	402	323	391	290	1405	260	1385	353	358	807	607	913	1197	678	1292	600	719	553	651	641	1157	486	1054	457	774	492	562	659
ENSMUSG00000002020	Ltbp2	16395	681	13257	793	333	82	629	78	560	125	695	101	761	323	390	709	296	82	188	73	654	116	823	80	702	49	664	418	659	110	609	360
ENSMUSG00000002028	Kmt2a	9895	7264	8085	7170	8994	9406	9791	10695	2613	4026	2904	3111	4499	6410	3968	4815	3341	6193	3071	4608	4017	7294	4673	5409	3034	5355	3674	5915	3724	4822	3484	5956
ENSMUSG00000002031	Ift46	747	738	804	1109	633	462	829	514	493	737	613	534	661	596	642	825	506	705	645	768	881	678	805	873	558	753	509	678	846	664	735	641
ENSMUSG00000002032	Tmem25	71	108	77	128	63	100	34	112	8	83	18	41	9	61	15	90	16	109	13	108	6	65	23	40	24	140	13	173	24	131	30	66
ENSMUSG00000002033	Cd3g	0	6	0	0	17	0	0	0	2	0	0	21	0	0	0	0	0	0	0	0	0	6	0	0	0	0	0	0	12	2	0	2
ENSMUSG00000002043	Trappc6a	156	49	269	66	109	52	134	38	277	291	253	111	229	69	195	88	268	55	295	78	187	83	173	59	240	97	206	96	165	82	199	73
ENSMUSG00000002052	Supt6	5234	4354	4860	4271	6161	8583	5924	7248	4780	2335	4814	2185	6144	3864	6056	3901	4125	3833	3525	3413	7125	4333	5761	3582	4751	3687	4823	3913	6250	3588	6736	4304
ENSMUSG00000002055	Spag5	115	26	119	24	257	22	339	28	609	63	575	41	71	79	54	67	881	9	835	17	125	43	169	33	507	34	603	52	90	18	39	49
ENSMUSG00000002057	Foxn1	321	6	343	18	76	2	91	0	364	52	342	51	67	0	32	0	499	5	476	2	20	0	15	0	244	15	255	7	15	0	34	2
ENSMUSG00000002058	Unc119	172	43	267	84	76	65	48	49	95	21	85	21	88	98	110	125	116	23	169	31	85	81	102	114	125	20	84	26	111	95	85	105
ENSMUSG00000002059	Rab34	336	636	423	931	139	576	110	501	538	1225	433	977	34	955	68	1090	589	1139	620	980	51	846	57	962	617	1104	588	1128	186	1044	64	947
ENSMUSG00000002064	Sdf2	584	471	756	592	544	585	586	531	665	820	664	866	910	795	915	872	540	584	540	552	926	716	827	681	630	600	647	613	861	749	942	664
ENSMUSG00000002068	Ccne1	27	32	33	20	66	96	72	213	420	63	367	21	34	96	50	81	280	26	286	32	51	85	68	61	320	44	297	42	40	27	17	89
ENSMUSG00000002076	Hsf2bp	29	0	37	2	7	0	5	2	6	0	5	11	0	2	0	0	6	0	7	4	6	0	4	0	7	2	3	2	5	2	0	2
ENSMUSG00000002083	Bbc3	117	185	139	68	162	285	172	342	19	198	16	131	100	84	71	81	31	88	50	88	111	213	124	255	64	115	68	93	94	151	140	140
ENSMUSG00000002100	Mybpc3	18	4	13	0	7	5	5	7	2	0	9	0	0	2	0	4	6	0	4	2	9	2	0	2	5	0	3	2	15	0	5	6
ENSMUSG00000002102	Psmc3	1138	802	1655	1291	962	1033	1134	866	2535	903	2605	1037	1085	1330	1245	1628	2037	1054	2350	908	1209	745	1302	932	2125	1026	2108	1079	1404	972	1449	1234
ENSMUSG00000002103	Acp2	663	1234	838	1694	557	1063	477	1044	373	654	355	1017	391	1037	522	1238	381	1595	390	1549	431	1115	419	1646	339	1288	353	1228	661	1485	486	1213
ENSMUSG00000002104	Rapsn	0	29	0	72	4	2	5	9	0	0	0	0	0	2	0	8	0	0	0	21	0	4	0	6	0	5	0	6	0	2	5	4
ENSMUSG00000002105	Slc39a13	268	605	289	685	201	446	296	454	255	810	353	715	175	735	231	827	411	968	399	786	258	504	247	868	352	721	355	767	361	769	258	708
ENSMUSG00000002107	Celf2	896	9487	641	8141	2896	5359	1862	5082	2646	2687	3106	3383	3116	4114	3861	3638	663	6481	635	6229	2653	3967	3468	4317	1915	4469	1892	4755	2991	2912	3852	4044
ENSMUSG00000002108	Nr1h3	22	79	17	95	27	135	29	188	6	83	12	81	0	41	22	44	6	153	7	155	12	202	12	204	7	103	5	105	10	81	0	28
ENSMUSG00000002109	Ddb2	547	471	529	543	485	467	696	544	278	260	267	282	287	317	429	391	280	559	237	495	286	397	311	564	269	439	280	413	338	443	330	386
ENSMUSG00000002111	Spi1	5	2	3	4	10	0	5	0	4	0	3	0	13	6	4	13	6	3	16	2	3	13	15	4	7	0	9	0	17	16	0	2
ENSMUSG00000002129	Sf3a1	1886	1254	2322	1954	1246	2006	843	1530	3011	986	3139	725	852	1447	1199	1700	3406	1679	3129	1377	1226	1006	1108	1073	2989	1485	2858	1495	1280	1350	1098	1493
ENSMUSG00000002147	Stat6	1871	1482	2258	1909	939	1396	1015	1182	2211	1235	2183	1390	1512	1033	1606	1347	1706	1927	1752	1815	1404	990	1613	1218	1968	1726	1913	1683	1838	1227	2053	1231
ENSMUSG00000002190	Clgn	82	9	0	0	0	2	0	4	0	0	0	0	0	2	0	0	0	0	0	7	6	8	0	2	3	0	0	2	5	2	0	4
ENSMUSG00000002204	Napsa	7	0	3	0	297	2	143	4	4	0	0	0	150	2	128	4	0	3	0	0	117	2	135	2	0	0	7	0	29	2	17	2
ENSMUSG00000002205	Vrk3	541	274	555	324	425	373	467	366	309	177	278	151	403	225	422	231	244	222	166	273	513	308	468	329	233	243	303	312	486	272	558	218
ENSMUSG00000002210	Smg9	508	320	573	351	287	275	434	230	422	260	513	292	420	274	369	276	517	274	550	275	397	294	461	263	608	269	561	295	406	297	507	277
ENSMUSG00000002221	Paxip1	716	622	676	595	715	720	801	857	880	561	841	393	524	557	472	510	768	638	767	616	516	566	476	504	824	677	933	647	467	573	452	621
ENSMUSG00000002222	Rmnd5a	3618	2975	3588	3113	2909	3832	2382	3789	1904	1183	1997	1128	2023	2872	2245	2521	1896	1988	1586	1963	2695	2993	1718	2711	1968	2063	2115	2044	2473	2158	1829	2316
ENSMUSG00000002227	Mov10	562	434	676	405	373	454	415	514	286	198	316	313	665	412	617	487	265	373	267	349	697	564	910	540	295	436	290	317	563	561	503	467
ENSMUSG00000002228	Ppm1j	44	16	57	4	33	32	67	33	73	21	63	0	437	43	405	27	57	11	65	6	309	57	423	25	41	12	40	2	188	40	258	29
ENSMUSG00000002233	Rhoc	295	644	325	603	498	851	391	641	306	1733	264	1279	1463	1176	1248	1206	237	970	160	906	1167	1104	1025	902	236	1157	248	1092	1078	1536	879	1218
ENSMUSG00000002240	Prr27	0	0	0	0	0	0	0	0	0	0	0	0	0	0	0	0	0	0	0	0	0	0	0	0	0	0	0	0	0	0	0	0
ENSMUSG00000002249	Tead3	1048	710	1014	770	860	1063	905	1057	453	488	435	413	499	514	472	632	496	763	497	672	425	692	535	896	486	647	530	598	549	995	478	563
ENSMUSG00000002250	Ppard	699	501	609	551	715	1101	758	816	1574	592	1467	524	312	719	486	602	1446	619	1503	539	635	590	509	585	1405	576	1460	680	551	506	473	585
ENSMUSG00000002257	Def6	694	182	852	301	142	45	220	49	734	291	781	131	75	67	82	113	815	195	856	120	100	46	143	51	725	227	760	163	132	57	64	100
ENSMUSG00000002265	Peg3	802	2968	23	1308	864	2806	196	4522	6	467	0	745	17	1080	22	691	16	807	13	1152	40	1355	60	1069	11	713	9	750	181	1023	39	735
ENSMUSG00000002266	Zim1	16	241	0	39	7	9	24	39	0	21	0	91	0	16	0	23	0	51	4	103	0	167	0	80	3	15	0	16	3	27	5	15
ENSMUSG00000002274	Metrn	18	43	27	35	14	42	24	34	37	125	47	61	9	55	4	53	60	38	40	48	12	53	15	53	51	50	66	69	19	65	0	60
ENSMUSG00000002279	Lmf1	396	143	417	256	198	207	262	235	160	125	196	242	208	297	259	378	288	212	316	189	309	209	262	263	168	224	183	240	368	388	309	310
ENSMUSG00000002280	Narfl	271	163	387	316	145	211	177	156	391	270	344	192	179	229	238	352	347	237	411	164	187	179	255	227	348	237	284	206	286	239	254	275
ENSMUSG00000002289	Angptl4	40	575	59	169	169	603	101	604	146	1069	63	1671	42	2501	47	1772	183	1923	261	1189	168	2492	131	2027	58	1161	133	1404	385	1762	43	2065
ENSMUSG00000002297	Dbf4	187	91	147	51	310	269	148	238	1003	135	979	51	208	139	206	97	786	74	691	91	326	134	262	82	784	123	807	161	228	77	165	113
ENSMUSG00000002307	Daxx	413	372	521	411	307	394	258	394	504	249	449	232	486	286	362	324	450	356	470	369	637	453	565	374	445	354	467	333	446	333	389	393
ENSMUSG00000002308	Cd320	128	48	139	64	73	55	110	59	144	436	174	242	79	364	71	549	101	209	151	207	105	209	113	264	145	195	143	254	228	358	89	404
ENSMUSG00000002319	Ipo4	1673	1214	1847	1121	1130	1123	1324	1148	2513	1297	2441	1148	715	2109	926	2235	2733	1794	2874	1688	1254	1606	1205	1944	2409	1469	2608	1474	1425	1921	1187	2090
ENSMUSG00000002320	Tm9sf1	912	1030	1214	1099	729	810	834	751	1332	716	1389	604	848	1246	1114	1226	1431	1340	1626	1232	1342	908	1228	1184	1417	1385	1497	1418	1346	1516	1386	1149
ENSMUSG00000002324	Rec8	42	100	39	4	136	39	120	128	4	0	0	21	21	4	4	2	3	17	0	32	26	32	27	14	5	20	15	9	24	7	5	8
ENSMUSG00000002325	Irf9	758	1373	1286	712	1401	1392	1386	1760	486	343	411	323	798	598	766	772	342	441	221	526	940	983	1059	1045	477	546	412	567	418	501	440	601
ENSMUSG00000002326	Gmpr2	358	337	381	357	343	591	377	619	460	177	438	192	133	321	217	373	455	218	408	236	207	262	236	270	375	272	343	273	310	277	182	261
ENSMUSG00000002329	Mdp1	310	116	395	239	109	88	124	90	424	270	515	232	270	293	341	333	458	247	531	258	227	164	337	208	433	256	414	286	322	258	258	272
ENSMUSG00000002332	Dhrs1	451	237	551	402	99	106	110	117	894	146	1008	343	495	446	412	510	658	364	666	366	397	223	345	264	788	308	926	297	357	360	326	395
ENSMUSG00000002341	Ncan	0	7	0	2	4	2	0	7	0	11	0	0	0	2	0	2	11	3	0	4	0	6	0	6	0	0	0	2	5	5	0	2
ENSMUSG00000002342	Tmem161a	290	337	353	458	142	396	243	402	242	187	291	333	142	276	195	368	334	354	341	391	156	325	206	391	278	377	313	374	305	477	131	379
ENSMUSG00000002343	Armc6	141	155	147	260	70	164	115	187	500	146	553	242	104	188	107	285	468	276	534	181	85	141	98	148	460	266	532	262	143	234	98	192
ENSMUSG00000002345	Borcs8	385	256	443	340	234	265	239	225	342	343	298	353	250	286	206	329	363	274	439	298	264	243	277	327	303	312	376	333	310	256	254	263
ENSMUSG00000002346	Slc25a42	468	197	505	274	162	250	234	295	627	353	673	453	84	176	142	299	514	920	507	509	91	181	109	295	579	727	563	791	209	335	203	223
ENSMUSG00000002365	Snx9	1028	1548	1050	1766	1068	1659	1091	1365	1036	1287	977	1118	1384	1648	1092	1667	868	1750	819	1781	1421	1961	1033	1712	1119	1681	1159	1724	1060	1759	1039	1822
ENSMUSG00000002372	Ranbp3	975	666	1002	812	1065	926	977	815	1076	747	1165	615	972	709	1032	864	1141	740	1148	690	898	716	1033	794	1199	780	1080	769	987	840	976	777
ENSMUSG00000002379	Ndufa11	699	179	784	208	251	188	253	145	811	976	855	554	823	385	780	385	676	297	961	295	609	223	640	319	653	277	754	293	673	319	592	268
ENSMUSG00000002384	Bmp8b	80	43	93	53	57	73	39	62	75	83	100	101	17	135	43	120	113	46	86	43	51	64	34	50	109	42	82	40	115	132	39	105
ENSMUSG00000002393	Nr2f6	565	271	740	283	491	464	605	434	553	830	500	484	802	422	791	530	599	408	608	377	731	555	794	598	608	430	567	392	816	686	811	455
ENSMUSG00000002395	Use1	1199	1104	1609	1496	1190	1684	1148	1441	711	2148	812	1349	744	1012	798	953	845	880	985	1086	623	862	629	1026	782	957	794	950	802	954	630	905
ENSMUSG00000002396	Ocel1	683	483	796	332	653	749	677	735	562	872	540	564	715	459	770	653	522	490	580	499	773	662	823	685	600	589	609	499	856	703	892	527
ENSMUSG00000002409	Dyrk1b	797	394	712	547	656	487	972	598	149	281	171	222	615	352	486	426	242	339	270	361	739	469	614	489	191	308	189	288	467	347	583	295
ENSMUSG00000002413	Braf	2806	2405	2282	2213	4422	4123	3443	4029	1418	1214	1283	1178	1089	2167	1475	1785	1284	1950	1375	1926	1305	2361	1497	2053	1227	2060	1506	2130	1863	1897	1162	2097
ENSMUSG00000002416	Ndufb2	543	321	605	373	439	418	443	449	671	623	753	383	316	487	295	512	673	333	847	421	258	330	307	366	649	357	670	350	401	346	254	446
ENSMUSG00000002428	Hltf	1344	1235	1248	1196	1081	846	896	928	871	291	1010	615	324	598	607	749	1128	968	1056	992	476	732	681	951	918	1073	897	1026	846	716	630	621
ENSMUSG00000002455	Prpf6	1214	854	1489	1367	1269	1543	1158	1232	1154	633	1141	534	657	654	975	1015	1220	1096	1117	918	963	713	857	764	1132	1096	1119	1017	1556	765	1128	749
ENSMUSG00000002458	Rgs19	297	130	313	173	83	44	96	80	442	260	477	262	258	342	210	408	522	222	534	256	136	118	150	197	545	271	378	254	244	247	127	324
ENSMUSG00000002459	Rgs20	36	31	33	18	57	25	34	56	86	42	78	21	25	38	4	15	31	13	28	14	17	37	19	21	66	28	61	31	22	15	5	15
ENSMUSG00000002475	Abhd3	14	101	7	132	10	98	34	65	8	73	5	51	13	41	15	55	8	92	7	107	9	78	4	66	9	71	5	96	17	79	5	48
ENSMUSG00000002477	Snrpd1	453	284	503	293	462	462	339	365	1517	343	1580	292	370	483	291	517	1040	291	1095	307	352	416	352	285	1108	351	1069	309	300	284	309	384
ENSMUSG00000002486	Tchp	334	291	341	396	225	254	329	314	331	146	296	121	208	190	217	296	360	209	277	202	173	197	292	325	280	264	288	226	307	226	250	237
ENSMUSG00000002489	Tiam1	4536	362	4694	655	1486	151	2034	145	4393	768	4189	383	1064	448	1039	320	4538	74	5052	202	966	141	1011	68	3993	330	4304	358	406	62	625	326
ENSMUSG00000002496	Tsc2	2253	2124	2224	2171	1885	2154	1986	2080	1339	1660	1571	1490	1330	1935	1599	2418	1618	2287	1491	2197	1577	1810	1736	2372	1381	2174	1636	2172	1990	2540	1445	2258
ENSMUSG00000002500	Rpl3l	0	2	0	4	7	4	10	5	0	0	3	0	9	0	8	9	0	5	4	2	0	9	4	4	3	2	3	0	5	2	0	8
ENSMUSG00000002504	Slc9a3r2	194	296	205	386	429	383	667	319	20	301	47	232	258	229	387	257	49	433	31	329	366	546	640	728	39	210	66	232	582	466	283	261
ENSMUSG00000002524	Puf60	1697	1296	2220	1619	1727	2094	1810	1507	2275	1370	2305	987	1679	1426	1628	1662	2206	1277	2304	1155	1566	1106	1587	1313	2104	1321	2033	1236	1575	1549	1542	1542
ENSMUSG00000002546	Golga2	1801	1746	2124	2208	1387	1422	1567	1337	1875	1131	1760	1108	1812	1445	2032	1813	1952	2092	1749	1672	1863	1404	1856	1878	1792	1977	1804	1933	1866	2089	2188	1659
ENSMUSG00000002550	Uck1	328	332	387	435	228	388	301	271	253	1339	280	1480	192	1104	220	1409	283	1894	255	1066	224	1171	292	1952	257	1912	194	1582	450	1933	216	1111
ENSMUSG00000002565	Scin	220	542	439	1022	231	168	262	164	347	1007	433	836	827	178	493	118	553	885	461	950	479	158	345	208	733	1144	813	1395	427	170	697	107
ENSMUSG00000002578	Ikzf4	141	674	75	204	995	2061	739	1748	33	115	32	21	5	94	11	80	60	84	80	145	29	223	23	191	60	39	45	50	47	131	13	114
ENSMUSG00000002580	Mien1	317	86	355	136	188	113	181	65	322	395	380	232	432	168	476	185	314	141	365	138	442	115	345	99	339	121	305	120	373	135	368	118
ENSMUSG00000002588	Pon1	0	2	3	2	20	2	5	4	0	0	3	0	0	0	0	2	3	0	0	0	3	0	4	2	0	0	0	2	17	4	5	2
ENSMUSG00000002602	Axl	969	8941	1180	9705	1124	8851	705	7270	1543	5758	1511	6896	54	6015	164	6123	1094	11158	945	12228	176	8910	146	9908	2282	8619	1774	9153	1184	8074	47	5929
ENSMUSG00000002603	Tgfb1	573	464	569	376	386	403	310	434	1755	1287	1926	947	333	1055	405	962	1372	807	1230	707	368	892	259	730	1684	1070	1711	1209	483	848	288	1104
ENSMUSG00000002608	Ccdc97	703	753	652	576	580	888	696	891	836	530	848	574	607	569	688	605	812	711	822	638	787	724	779	707	767	838	893	707	746	659	655	536
ENSMUSG00000002617	Zfp40	332	231	371	291	132	168	129	213	66	32	74	81	42	163	18	220	70	180	53	174	17	201	27	340	51	203	70	172	61	204	26	178
ENSMUSG00000002625	Akap8l	1052	1051	1048	1039	1051	1932	1315	2017	248	405	280	675	337	768	543	1054	337	1016	264	832	371	1027	502	1162	263	899	273	745	539	1001	499	891
ENSMUSG00000002633	Shh	189	2	125	0	7	0	15	2	8	0	9	0	5	0	0	0	16	3	25	0	0	0	4	0	47	2	30	4	0	0	0	0
ENSMUSG00000002635	Pdcd2l	161	78	155	95	122	123	120	90	231	83	291	101	79	120	121	169	191	120	234	96	77	108	173	131	204	121	217	119	136	107	77	98
ENSMUSG00000002658	Gtf2f1	771	1355	904	681	999	1755	953	2281	1312	820	1303	1158	790	744	965	813	1138	621	997	854	768	709	943	579	1083	1227	966	930	807	529	854	885
ENSMUSG00000002660	Clpp	308	197	287	330	132	277	120	214	476	498	504	413	138	268	167	357	424	299	464	273	207	158	165	187	439	271	420	259	218	225	220	259
ENSMUSG00000002661	Alkbh7	86	76	121	53	33	32	101	67	115	146	118	91	63	73	82	94	57	40	111	39	40	39	72	59	85	46	99	45	73	76	43	73
ENSMUSG00000002664	Pspn	14	26	0	10	10	15	15	44	6	0	5	21	5	6	0	15	0	3	0	6	0	8	8	6	0	18	0	7	8	7	5	10
ENSMUSG00000002668	Dennd1c	75	11	77	6	96	4	139	9	17	0	12	0	237	16	121	6	13	5	10	0	261	8	199	6	43	7	30	7	122	5	148	6
ENSMUSG00000002679	Med6	345	264	305	291	307	423	224	391	437	135	471	172	270	194	181	243	370	218	298	263	309	190	195	223	369	232	328	202	211	182	195	227
ENSMUSG00000002688	Prkd1	22	253	11	276	449	798	362	706	2	73	5	81	30	286	32	289	18	134	7	132	71	280	68	289	5	89	7	127	73	214	34	248
ENSMUSG00000002699	Lcp2	3	4	0	2	17	2	0	0	0	0	0	0	5	16	0	13	0	5	0	4	3	11	4	0	0	4	0	2	19	7	0	31
ENSMUSG00000002718	Cse1l	2169	1904	2154	1750	2616	2950	2162	2935	4304	903	3858	1259	1076	2068	1185	1934	4001	1831	3721	1793	1379	2212	1254	1582	3536	1920	3693	2056	1435	1491	925	1875
ENSMUSG00000002728	Naa20	633	577	605	543	287	431	224	562	1201	498	1139	272	221	510	242	500	750	339	816	371	258	439	292	447	803	449	817	459	324	390	203	406
ENSMUSG00000002731	Prkra	391	214	603	404	172	229	281	272	346	198	324	192	254	354	323	385	363	197	408	214	269	281	318	355	339	227	343	233	352	394	296	294
ENSMUSG00000002732	Fkbp7	49	615	53	923	53	295	39	297	17	436	32	796	38	613	36	632	18	853	28	876	34	653	30	864	26	759	26	743	99	642	22	632
ENSMUSG00000002733	Plekha3	703	602	692	644	659	758	462	769	437	343	431	564	931	965	1234	762	393	809	316	603	1413	759	984	673	437	819	399	788	1219	658	1369	766
ENSMUSG00000002741	Ykt6	839	925	1124	997	709	1283	520	840	1783	820	1678	725	1218	1223	1316	1456	1492	1098	1602	1044	1436	1011	1235	909	1674	1044	1588	1000	1165	958	1225	1218
ENSMUSG00000002748	Baz1b	4123	3344	4431	4374	3321	5250	3120	5338	4068	1443	3936	1299	1392	2773	2007	3622	4430	4107	3930	3302	1461	3824	1991	3748	4109	3860	3975	3742	2267	2911	1863	3023
ENSMUSG00000002763	Pex6	578	402	826	562	455	571	524	577	476	623	500	544	640	578	525	589	737	506	562	448	519	525	685	577	450	398	519	485	640	721	596	648
ENSMUSG00000002767	Mrpl2	288	118	425	225	152	101	143	114	613	291	557	111	167	231	249	222	416	164	550	164	230	137	251	202	454	214	483	221	272	176	271	209
ENSMUSG00000002768	Mea1	332	189	413	212	287	224	329	164	515	436	568	343	657	299	614	387	447	262	491	278	527	162	535	247	435	316	502	250	472	266	549	292
ENSMUSG00000002769	Gnmt	20	4	19	14	17	15	24	5	15	21	16	0	0	6	4	8	21	11	25	12	9	6	4	0	11	9	28	21	8	0	0	0
ENSMUSG00000002771	Grin2d	36	200	67	210	57	189	34	149	30	249	23	222	50	235	29	208	47	345	28	270	29	311	68	443	39	378	49	350	59	336	39	326
ENSMUSG00000002778	Kdelr1	1274	1362	1751	2151	748	1414	696	1201	1850	1743	1835	2004	1188	1882	1316	2096	1811	1892	2080	1904	1775	1671	1441	2272	1727	2242	1680	2008	1638	2291	1162	1954
ENSMUSG00000002781	Tmem143	134	152	221	161	99	149	77	175	115	104	138	91	38	143	61	180	147	103	151	150	77	109	57	144	142	169	133	153	146	182	81	160
ENSMUSG00000002791	Pdxk-ps	0	6	3	4	10	5	5	9	0	0	0	0	5	0	4	2	0	7	0	7	0	6	8	2	5	4	0	4	5	0	5	0
ENSMUSG00000002797	Ggct	95	169	145	105	244	239	134	386	582	94	367	81	96	137	86	176	291	90	209	96	77	85	102	85	424	155	433	158	115	62	81	76
ENSMUSG00000002799	Jag2	3579	162	3798	865	271	62	458	36	3966	882	4184	393	59	12	89	27	5293	28	4304	51	43	20	75	14	4938	407	5045	456	223	41	127	20
ENSMUSG00000002803	Btbd6	347	152	407	233	195	116	277	146	291	208	271	141	175	225	206	280	309	207	310	206	196	164	251	168	327	216	349	254	242	168	207	198
ENSMUSG00000002804	Nudt14	183	22	315	32	89	14	81	13	331	104	367	41	59	65	103	73	339	28	448	22	85	27	94	23	369	41	311	40	125	32	119	67
ENSMUSG00000002808	Epdr1	132	1259	29	1491	103	626	43	593	8	768	20	1037	9	1269	39	1097	24	1687	43	1724	43	767	19	751	13	1779	15	1430	258	1830	13	1144
ENSMUSG00000002812	Flii	2696	2121	2919	2752	2471	2743	2405	2279	2973	2107	2922	1973	3548	2177	2957	2687	3054	3206	2871	2848	3573	1662	3502	1899	2885	2674	3286	2573	3070	2393	3109	2450
ENSMUSG00000002814	Top3a	281	372	341	311	320	353	381	327	313	218	302	81	241	149	217	182	329	214	326	218	210	222	247	240	301	192	280	256	275	236	229	192
ENSMUSG00000002820	Atg4d	833	419	836	471	745	724	743	614	818	260	897	313	524	350	628	417	850	435	829	394	547	401	693	381	708	494	813	374	675	330	664	366
ENSMUSG00000002825	Qtrt1	393	212	367	167	330	252	372	292	317	166	327	151	246	155	351	229	283	222	277	213	326	294	367	219	414	203	401	187	457	162	368	196
ENSMUSG00000002831	Plin4	62	217	53	334	129	351	191	614	22	73	16	71	67	57	86	59	26	126	25	218	77	127	72	99	22	71	34	131	167	70	106	49
ENSMUSG00000002833	Hdgfrp2	613	520	573	595	495	699	586	832	566	405	575	453	536	553	575	739	627	590	565	514	487	601	513	673	572	579	582	574	612	598	761	663
ENSMUSG00000002835	Chaf1a	262	128	289	198	254	196	181	206	869	135	906	91	175	114	117	129	838	55	872	66	168	111	199	87	962	137	840	184	108	62	85	120
ENSMUSG00000002844	Adprh	167	577	243	764	178	600	62	480	329	716	369	635	117	514	132	528	278	571	451	573	111	883	169	1067	320	763	347	678	228	1326	102	596
ENSMUSG00000002845	Tmem39a	538	804	547	787	903	1502	762	1031	685	727	579	675	349	1115	476	1152	612	1096	574	1005	603	1383	625	1463	602	1644	739	1435	624	1552	499	1061
ENSMUSG00000002846	Timmdc1	310	157	365	243	178	232	220	170	598	208	664	232	208	352	259	359	553	253	592	268	306	209	251	298	579	288	509	259	366	302	258	350
ENSMUSG00000002847	Pla1a	0	1471	25	1665	7	19	5	25	8	3289	3	4852	21	1267	0	1205	6	6398	4	5079	34	1599	23	2084	3	5292	0	5561	40	2009	0	1086
ENSMUSG00000002870	Mcm2	468	79	587	231	524	290	377	169	2333	249	2186	81	383	336	281	436	2242	126	2181	122	320	51	412	99	2676	301	2574	324	300	142	313	281
ENSMUSG00000002871	Tpra1	330	231	401	318	211	222	429	221	188	249	196	192	183	235	217	262	211	314	234	250	142	201	199	295	217	227	219	220	279	255	220	225
ENSMUSG00000002881	Nab1	2347	1815	2202	2481	1799	1965	1329	1572	4412	1380	4033	1017	1932	1662	1458	1574	3657	1959	3706	1916	2783	1552	1459	1428	3478	2004	3823	1818	1135	1193	1183	1417
ENSMUSG00000002885	Adgre5	1474	279	1278	146	416	542	591	751	446	1868	316	2296	2360	3300	3071	1936	352	1639	227	879	3550	4835	2806	5503	799	2221	721	2331	4675	5134	4012	1889
ENSMUSG00000002897	Il17ra	523	2143	469	890	841	2895	591	2823	378	3860	395	4440	478	4658	330	3854	483	4849	430	4490	569	6241	461	5322	405	7738	458	6441	1179	9346	414	4480
ENSMUSG00000002900	Lamb1	1283	10892	1194	8835	1539	6993	848	7155	2731	5551	3048	6553	3776	12579	5067	12624	3259	7457	3154	7040	3652	12062	3360	12849	2207	9053	2278	9300	5601	17313	5461	13219
ENSMUSG00000002908	Kcnn1	38	153	53	121	17	60	15	54	28	94	34	111	34	45	18	78	44	101	47	69	15	79	23	131	28	55	21	59	33	107	17	82
ENSMUSG00000002910	Arrdc2	356	237	439	165	208	310	358	593	64	312	78	242	503	116	546	160	83	149	86	154	371	216	580	198	89	187	91	232	371	99	558	133
ENSMUSG00000002930	Ppp1r17	0	4	0	0	0	0	0	0	0	0	0	0	0	0	0	0	0	0	0	0	0	0	0	0	0	0	0	0	0	0	0	0
ENSMUSG00000002944	Cd36	9	39	7	2	14	30	10	39	6	21	3	21	13	28	15	27	13	11	13	43	0	30	12	23	3	2	3	23	64	101	0	29
ENSMUSG00000002948	Map2k7	1061	733	994	995	1088	843	1243	810	771	841	965	604	1272	969	1383	1073	871	956	847	854	1175	996	1493	986	1007	1142	834	1002	1392	1091	1542	985
ENSMUSG00000002949	Timm44	666	368	768	510	584	394	634	491	825	270	744	252	403	446	500	477	843	414	740	337	388	437	535	479	712	409	798	372	457	407	410	406
ENSMUSG00000002957	Ap2a2	3456	2361	3806	2667	1328	1932	1291	1813	3093	2262	3286	1913	1944	3062	2167	3587	2956	3309	2865	2885	2508	2766	2331	2628	2875	2720	3089	2898	2405	3086	2036	3316
ENSMUSG00000002963	Pnkp	288	145	349	231	165	178	201	122	268	239	327	353	196	250	288	352	345	312	362	251	207	181	304	253	331	343	271	355	329	311	305	275
ENSMUSG00000002968	Med25	1384	1477	1317	1109	1681	1937	1667	1585	1514	1847	1418	1178	1238	1396	1518	1616	1590	1298	1439	1448	1464	1089	1594	1350	1551	2309	1558	2138	1730	1533	1538	1511
ENSMUSG00000002980	Bcam	4534	192	5561	1097	1964	323	2177	416	7531	913	8712	524	1508	2123	1883	2571	8282	59	8408	71	2092	374	2297	361	9267	489	9133	541	3108	567	2547	2016
ENSMUSG00000002981	Clptm1	1897	1420	2374	1735	1193	1981	1258	1676	2713	1391	2618	1460	1679	2078	1883	2124	3046	1637	3239	1660	2115	1548	1781	1712	2506	1774	2621	1796	2084	2344	1922	2043
ENSMUSG00000002983	Relb	742	1148	756	407	1849	1564	1691	1465	95	851	69	836	1321	1041	717	830	90	682	59	886	1252	1236	932	653	238	907	271	827	664	667	786	1059
ENSMUSG00000002984	Tomm40	499	274	581	301	435	423	553	347	1414	530	1312	302	420	414	447	400	1449	333	1678	335	479	290	446	285	1290	364	1308	314	530	336	389	398
ENSMUSG00000002985	Apoe	8522	27550	10565	34970	1038	3961	615	3448	4174	8196	5234	4802	316	1340	348	2061	6954	11610	7613	13091	286	1873	255	1520	5662	7995	5593	9436	1268	2663	309	2036
ENSMUSG00000002992	Apoc2	0	0	0	0	0	0	0	0	0	0	0	0	0	0	0	0	0	0	0	0	0	0	0	0	3	0	3	2	0	0	0	0
ENSMUSG00000002996	Hbp1	3307	3124	3604	3771	3216	4777	2824	4433	1901	2003	2208	1994	3195	4143	2822	3036	1855	3142	1783	3085	4088	4379	2339	4016	2464	3237	2366	3471	2634	3060	2209	3003
ENSMUSG00000002997	Prkar2b	883	163	836	202	99	227	77	211	598	21	715	81	412	96	461	73	904	28	651	41	442	143	502	157	634	74	504	112	315	129	296	91
ENSMUSG00000003031	Cdkn1b	1737	2193	1829	3264	1200	1818	1139	2172	1143	1204	1185	1088	503	1658	515	1924	1269	1783	1184	1890	612	1961	636	2029	1195	1850	1157	1753	959	2219	583	1699
ENSMUSG00000003032	Klf4	8296	45903	4734	11410	7531	16841	5239	16112	9155	28665	9018	35262	13509	9244	15848	9469	10144	19980	7267	32880	11416	11530	12177	13630	11946	24523	12238	25345	14532	22490	11132	17141
ENSMUSG00000003033	Ap1m1	545	661	547	754	313	810	343	706	794	478	828	494	108	1141	142	1314	725	813	776	776	117	676	102	762	738	734	704	692	322	841	119	1082
ENSMUSG00000003037	Rab8a	789	562	1236	896	475	644	453	570	1223	602	1254	554	756	731	639	774	1092	745	1295	620	787	406	741	628	1129	697	1027	712	778	683	549	688
ENSMUSG00000003038	Hmgn2	277	263	241	289	402	386	391	452	638	581	673	433	187	412	146	373	437	264	399	282	139	229	259	295	492	269	576	314	172	236	161	357
ENSMUSG00000003039	Fam32a	1522	689	1707	1045	844	811	848	790	1249	384	1425	494	1039	813	1029	1010	961	676	976	726	1113	613	917	934	1132	679	1096	682	1081	794	1107	901
ENSMUSG00000003051	Elf3	5104	68	4129	59	5446	144	4748	31	820	52	1014	272	12495	49	14784	203	627	9	510	21	10621	76	15499	16	2188	36	1907	83	10822	289	11943	62
ENSMUSG00000003053	Cyp2c29	0	0	0	0	0	0	0	0	0	0	0	0	0	0	0	0	0	0	0	0	0	0	0	0	0	0	0	0	0	0	0	0
ENSMUSG00000003062	Stard3nl	336	313	393	506	376	376	358	363	297	166	382	403	366	510	383	551	262	425	338	487	453	395	416	487	337	446	290	389	399	732	414	532
ENSMUSG00000003068	Stk11	1542	1182	1936	1258	1878	2312	1981	2004	1421	1007	1434	1047	1122	1029	1178	1275	1454	1192	1519	1232	1314	1257	1246	1073	1464	1129	1397	1067	1273	1130	1284	1180
ENSMUSG00000003070	Efna2	29	128	31	111	80	105	86	172	59	52	49	101	9	143	25	160	34	95	47	58	15	101	12	149	51	84	59	81	47	134	9	118
ENSMUSG00000003072	Atp5d	1564	1094	1857	1070	966	1252	1196	1334	2909	3092	3066	1943	1434	1484	1653	1389	2437	939	2942	1071	1280	887	1519	1075	2451	1126	2266	1098	1416	1256	1441	1258
ENSMUSG00000003099	Ppp5c	1190	757	1451	1012	663	808	748	687	2346	675	2529	524	673	848	834	1032	2769	816	2663	813	632	671	809	730	2083	835	2144	843	933	776	672	903
ENSMUSG00000003119	Cdk12	3004	3983	2462	2111	4672	5166	4248	5722	2284	2864	2310	2698	3319	3042	3099	2433	2186	3236	1997	3208	3290	4614	3199	3037	2131	3871	2285	3814	2438	2672	2838	3468
ENSMUSG00000003123	Lipe	1199	261	798	332	620	231	881	289	160	94	127	182	898	231	1039	296	124	226	123	157	1243	250	1385	181	159	198	173	206	1128	212	1065	281
ENSMUSG00000003131	Pafah1b2	1840	1872	1817	2336	1025	1857	858	1695	2945	1308	2796	886	985	1592	1103	1604	2214	1888	2442	1845	1136	1508	992	1603	2508	1994	2560	1934	1493	1725	993	1569
ENSMUSG00000003134	Tbc1d8	1302	466	1315	413	1529	629	1896	727	800	239	790	323	208	270	210	276	958	209	807	308	368	334	375	232	1043	325	1040	297	357	182	279	209
ENSMUSG00000003135	Cnot11	646	547	798	743	505	732	405	580	856	229	828	443	366	498	369	502	794	494	758	470	408	539	487	493	771	557	708	553	518	444	347	427
ENSMUSG00000003153	Slc2a3	202	646	47	328	537	1460	462	1988	60	187	38	282	0	721	4	510	101	324	47	278	40	1515	8	1137	24	269	68	300	181	476	0	612
ENSMUSG00000003154	Foxj2	1199	1219	1212	1322	897	1455	862	1243	747	830	690	665	661	932	972	1048	984	1052	859	987	960	841	636	853	892	960	771	1096	886	1092	930	970
ENSMUSG00000003161	Sri	995	1511	1122	2372	1058	1056	981	1051	760	644	790	977	1961	904	2043	1106	702	1252	669	1278	1566	852	1340	1090	744	1031	809	969	1878	954	1707	789
ENSMUSG00000003166	Dgcr2	2363	1321	2512	1828	1374	1507	1424	1368	2130	1017	2263	1007	1280	1412	1855	1699	2512	1568	2543	1298	1597	1329	1744	1601	2332	1565	2371	1385	2585	1825	2002	1538
ENSMUSG00000003184	Irf3	652	427	650	458	465	793	543	779	540	519	579	433	557	426	593	614	553	446	583	420	428	353	663	391	513	602	488	473	619	399	579	353
ENSMUSG00000003190	Bcl2l12	189	155	197	159	152	166	172	221	204	83	176	292	142	145	153	183	226	151	203	155	139	129	199	140	181	140	177	129	162	145	161	133
ENSMUSG00000003198	Zfp959	260	128	245	194	139	178	86	166	166	52	178	51	117	98	125	120	101	88	102	130	108	116	161	76	159	153	141	107	115	73	93	78
ENSMUSG00000003199	Mpnd	455	360	613	442	449	308	548	297	353	426	462	403	300	317	334	387	465	299	479	342	306	250	434	349	411	306	368	262	345	443	275	341
ENSMUSG00000003200	Sh3gl1	626	785	772	874	778	830	891	649	1061	758	1170	826	545	807	671	1013	961	903	902	938	691	799	737	920	1038	793	1012	807	661	976	630	990
ENSMUSG00000003206	Ebi3	9	2	3	0	0	2	0	5	0	0	3	0	9	4	8	4	0	3	4	0	3	2	0	0	5	0	5	0	3	0	0	2
ENSMUSG00000003208	Ccdc94	202	90	217	165	162	116	296	85	162	73	149	121	104	79	96	134	160	115	160	86	125	99	124	134	176	134	122	103	118	107	161	109
ENSMUSG00000003226	Ranbp2	8233	9151	7753	8116	15619	17848	12382	17190	7727	2833	6855	3594	5945	7483	6509	6113	7314	6421	6923	6707	6967	8352	6001	5660	6776	7284	6760	7307	7108	4892	5942	6600
ENSMUSG00000003227	Edar	332	11	399	59	40	4	91	7	10	0	38	0	5	0	11	11	70	0	80	6	20	11	8	6	30	5	30	11	22	5	0	6
ENSMUSG00000003228	Grk5	99	721	75	690	257	247	167	378	97	519	78	584	108	740	142	616	47	843	31	903	153	1036	180	715	53	682	57	699	218	744	123	753
ENSMUSG00000003233	Dvl3	1089	1079	1194	1169	696	990	801	891	958	602	957	675	640	977	695	1206	1161	1246	1074	921	827	1324	924	1633	1136	1115	1132	1041	945	1525	676	1086
ENSMUSG00000003234	Abcf3	635	437	782	659	567	909	648	852	618	260	619	222	329	389	458	526	653	563	651	544	383	364	457	445	630	549	586	452	502	346	406	371
ENSMUSG00000003235	Eif2b5	1006	375	1311	768	686	742	496	577	2337	530	2197	333	678	641	667	762	2281	596	2451	536	841	522	846	517	1994	521	1898	516	800	556	706	565
ENSMUSG00000003269	Cyth2	817	878	802	605	1348	1715	1310	1402	702	924	713	655	1903	774	1323	806	848	807	734	911	1648	1103	1430	1062	988	967	1004	940	1088	954	1538	842
ENSMUSG00000003271	Sult2b1	119	9	121	28	30	10	67	13	188	21	154	0	63	4	61	8	85	3	68	0	49	6	49	4	62	26	137	9	83	0	34	8
ENSMUSG00000003273	Car11	16	27	11	59	37	106	15	149	0	21	3	41	30	59	25	55	11	30	0	39	20	136	19	185	7	36	0	26	29	65	13	69
ENSMUSG00000003279	Dlgap1	143	584	37	382	864	982	1034	852	15	644	18	604	46	635	36	436	11	485	28	566	54	1060	57	1486	30	776	28	836	160	1121	51	449
ENSMUSG00000003282	Plag1	16	69	7	109	63	151	15	208	6	11	3	51	42	34	25	25	6	34	13	56	3	51	30	25	9	44	13	57	38	51	9	48
ENSMUSG00000003283	Hck	36	2	37	0	4	4	0	4	2	11	0	11	5	14	8	15	0	0	0	6	3	13	8	6	0	2	5	2	15	11	13	31
ENSMUSG00000003299	Mrpl4	459	454	621	557	422	426	443	353	700	592	757	514	329	619	277	600	794	638	724	504	329	508	345	587	685	571	651	603	378	669	288	603
ENSMUSG00000003308	Keap1	756	434	952	760	313	348	348	363	932	540	1063	262	408	432	522	616	1166	492	1148	416	487	302	554	551	922	523	981	456	563	564	482	559
ENSMUSG00000003309	Ap1m2	837	39	1106	92	488	10	510	4	1285	94	1385	41	1118	6	1227	11	917	5	1111	17	1300	20	1284	2	977	42	1130	47	1245	29	1170	11
ENSMUSG00000003316	Glg1	5337	8198	5689	9672	3937	7145	3424	6455	5104	4244	5398	4651	3315	6427	4315	6626	6166	7213	5696	6979	4849	5725	3936	7405	5308	6641	5589	7117	4814	7261	3303	6730
ENSMUSG00000003341	Atp8b3	11	26	5	2	27	12	29	73	4	0	3	31	5	10	0	6	3	9	0	32	15	25	8	2	0	10	5	12	12	5	0	6
ENSMUSG00000003344	Btbd2	672	562	838	681	366	479	505	614	573	530	777	494	457	670	529	734	727	625	761	564	564	539	715	643	632	605	706	586	596	856	507	681
ENSMUSG00000003345	Csnk1g2	1403	891	1473	1055	1226	1341	1191	1093	1821	1131	1618	604	1434	1012	1248	1321	1713	809	1697	775	1274	864	1377	1190	1737	845	1730	872	1219	1307	1441	1196
ENSMUSG00000003346	Abhd17a	339	217	489	318	218	297	220	240	896	685	855	393	437	475	419	524	691	339	945	345	473	395	419	457	638	364	748	353	472	435	461	429
ENSMUSG00000003348	Mob3a	262	486	211	398	735	1366	643	1075	326	519	386	494	258	553	178	690	321	458	369	485	218	474	165	419	416	489	378	442	214	584	157	682
ENSMUSG00000003352	Cacnb3	494	498	451	683	478	373	281	381	204	789	207	786	312	957	351	1226	386	665	316	539	315	894	318	1190	293	629	246	627	394	1081	157	1024
ENSMUSG00000003354	Ccdc65	14	21	3	2	40	17	39	30	46	0	60	21	38	26	64	20	6	9	25	11	29	29	30	8	20	12	13	16	127	22	89	22
ENSMUSG00000003355	Fkbp11	33	49	37	51	50	34	29	31	97	374	100	182	308	145	461	141	70	90	83	90	230	111	210	176	87	100	74	131	532	150	558	91
ENSMUSG00000003360	Ddx23	2066	1351	2154	1878	1457	2375	1443	1968	2130	903	2190	796	1654	1273	1564	1586	2188	1447	2006	1318	1577	1164	1867	1316	1949	1409	1949	1445	1751	1380	1483	1390
ENSMUSG00000003363	Pld3	677	1412	732	1793	383	777	386	661	591	1961	622	2507	827	2451	887	2599	604	2195	826	2116	937	1813	876	2108	646	2350	605	2179	1226	2655	875	2631
ENSMUSG00000003378	Grik5	257	723	223	741	729	720	767	721	17	550	23	564	158	373	149	408	52	882	28	739	119	555	206	662	20	698	47	658	293	655	144	505
ENSMUSG00000003379	Cd79a	7	26	3	6	33	27	58	51	8	0	5	11	5	10	8	13	0	7	7	21	23	36	0	14	5	13	7	14	8	7	9	20
ENSMUSG00000003380	Rabac1	749	1054	1198	1622	514	1399	558	997	424	1712	489	1188	702	1004	695	1083	663	1196	801	1200	652	711	603	1003	638	1269	647	1240	893	1183	761	954
ENSMUSG00000003382	Etv3	2031	815	1962	967	1849	1329	1586	1138	996	644	870	443	2090	596	1681	568	1195	613	1212	595	2766	790	1968	558	1343	814	1218	788	1608	606	1799	565
ENSMUSG00000003402	Prkcsh	1138	950	1463	1223	920	1108	901	871	1428	1245	1478	1329	1695	1855	1791	2068	1629	1292	1841	1104	1877	1303	1789	1693	1362	1333	1319	1303	1882	2144	1669	1931
ENSMUSG00000003410	Elavl3	66	51	5	4	47	35	20	43	4	0	3	11	9	8	8	4	6	7	4	24	12	25	4	10	9	9	7	9	0	0	5	8
ENSMUSG00000003411	Rab3b	55	49	7	6	0	37	5	18	0	0	5	31	0	0	0	4	6	5	0	11	0	8	0	6	3	2	7	9	3	2	5	2
ENSMUSG00000003418	St8sia6	172	9	187	4	175	34	186	20	0	11	0	11	0	4	0	6	0	9	4	11	9	11	0	2	0	17	0	40	68	5	0	4
ENSMUSG00000003420	Fcgrt	227	2170	317	2446	313	1760	215	1756	11	3051	9	2980	21	1818	47	1968	39	3167	34	3496	77	3115	60	2960	30	3107	21	2754	385	3254	26	2039
ENSMUSG00000003421	Nosip	534	407	672	681	307	363	315	295	551	488	699	443	428	336	412	440	532	387	546	374	453	316	401	394	560	430	513	444	408	434	427	431
ENSMUSG00000003423	Pih1d1	321	397	413	469	271	335	315	316	536	364	526	292	270	328	348	373	583	243	700	319	301	306	378	334	479	266	494	293	298	339	347	346
ENSMUSG00000003429	Rps11	5541	2119	6923	3580	4086	2786	3553	2546	6979	6578	7439	5174	2933	3345	3081	3407	8056	3018	8518	3597	3335	2728	3057	2696	6473	3818	7063	3817	2986	3176	2610	3193
ENSMUSG00000003435	Supt5	2431	1982	2615	2460	2475	2720	3129	2692	2557	1432	2587	1450	2684	2013	2900	2404	2630	2034	2454	2017	2811	1936	2982	1780	2440	2070	2461	2085	2679	1806	2876	2016
ENSMUSG00000003436	Dll3	7	11	3	2	14	4	20	15	0	0	0	11	0	0	15	2	3	0	4	7	0	9	12	0	0	0	3	2	5	7	13	2
ENSMUSG00000003437	Paf1	951	1115	878	989	1140	1561	1229	1765	749	623	841	725	549	842	713	966	717	945	770	975	657	922	674	996	774	989	700	1009	706	752	566	838
ENSMUSG00000003438	Timm50	334	222	537	262	225	226	305	208	882	395	812	172	333	262	298	398	971	237	1037	194	349	187	375	208	727	251	849	269	307	247	283	257
ENSMUSG00000003444	Med29	181	189	223	252	139	275	186	264	369	343	349	192	138	166	139	236	296	180	298	218	125	127	139	151	233	177	225	161	179	212	106	189
ENSMUSG00000003452	Bicd1	751	552	409	475	1098	687	1081	960	97	0	162	141	329	1336	522	1502	196	193	191	202	482	385	625	487	206	147	143	127	746	252	465	1041
ENSMUSG00000003458	Ncstn	2112	1847	2534	2285	959	1088	972	965	1968	1847	1970	1369	2854	1449	3283	1827	2037	2090	2154	2331	3451	1411	2967	1673	1964	2297	2150	2321	3213	2086	2957	1849
ENSMUSG00000003464	Pex19	587	646	750	752	485	836	529	758	740	540	775	423	474	604	571	674	714	634	737	680	569	611	558	792	757	560	777	591	619	760	478	597
ENSMUSG00000003469	Phyhip	165	79	227	117	14	7	24	28	2344	353	2731	252	38	721	82	751	2414	1355	2470	859	17	30	27	12	2887	745	2740	620	263	101	136	827
ENSMUSG00000003476	Crhr2	11	24	3	10	24	35	5	51	0	0	0	11	0	12	4	6	3	0	0	7	3	29	4	17	0	4	0	2	5	7	0	13
ENSMUSG00000003477	Inmt	38	7498	83	8728	109	424	34	1086	6	820	5	1651	30	4	71	0	21	9165	22	12174	29	1943	19	1005	15	1210	17	995	272	124	119	11
ENSMUSG00000003484	Cyp4f18	7	0	13	4	4	2	0	0	10	0	7	11	5	108	4	189	8	3	7	2	0	16	4	8	11	2	5	2	31	59	5	210
ENSMUSG00000003500	Impdh1	339	276	261	280	234	310	277	242	816	364	808	272	59	272	71	271	904	381	997	290	66	332	83	389	759	380	683	379	167	335	64	294
ENSMUSG00000003505	Psg18	0	0	0	0	0	0	0	0	0	0	0	0	0	0	0	0	0	0	0	0	0	0	0	0	0	0	0	0	0	0	0	0
ENSMUSG00000003518	Dusp3	424	1644	325	1960	564	893	443	628	395	1079	349	1098	557	2158	617	2379	342	2293	292	2400	660	1336	479	1309	375	2236	345	2087	1022	1740	457	1797
ENSMUSG00000003526	Prodh	332	105	357	109	906	257	1362	289	179	52	240	81	67	41	71	55	429	49	387	51	68	86	109	53	278	58	250	57	59	48	77	37
ENSMUSG00000003527	Dgcr14	429	288	455	361	251	315	334	256	313	125	320	131	179	186	203	276	301	235	332	250	187	223	210	270	274	314	326	290	228	258	195	223
ENSMUSG00000003528	Slc25a1	721	362	858	442	409	280	443	240	1078	457	1143	625	462	565	671	746	1236	448	1335	420	669	387	722	543	926	448	891	374	661	656	659	634
ENSMUSG00000003531	Dgcr6	172	125	285	206	132	118	196	151	246	208	282	182	71	174	86	180	324	126	362	117	54	127	72	140	320	153	259	170	83	193	77	176
ENSMUSG00000003534	Ddr1	2279	377	3073	886	1651	605	1777	509	2013	934	2081	443	2850	1923	2840	3557	3133	513	2914	497	2245	594	2971	694	2476	615	2381	629	2091	903	2319	2092
ENSMUSG00000003541	Ier3	2775	6770	1735	3246	6797	6910	4867	5244	1192	2968	988	4047	13995	4133	10721	2896	1415	3025	737	3625	10202	4665	9181	3629	2993	4366	2444	4223	8737	4241	10157	3933
ENSMUSG00000003545	Fosb	38444	114308	27283	31838	35718	70528	30163	65861	3779	99896	3934	120994	20458	37788	26689	45749	13633	64816	7656	94468	18349	46758	27758	58104	34963	122683	27746	117037	36887	84774	26314	68465
ENSMUSG00000003546	Klc4	411	180	469	233	330	237	439	240	155	177	205	131	624	188	635	370	206	187	209	186	601	213	786	281	227	210	219	194	647	266	748	292
ENSMUSG00000003549	Ercc1	339	451	367	299	551	697	567	713	949	1017	870	544	1346	908	812	581	565	389	614	502	739	639	607	472	638	383	681	382	448	510	820	478
ENSMUSG00000003555	Cyp17a1	0	9	5	14	14	9	5	18	0	0	0	0	0	0	0	4	0	3	4	11	6	0	12	6	7	12	3	12	3	4	5	10
ENSMUSG00000003559	As3mt	108	76	133	105	76	207	91	172	79	198	89	111	17	299	36	371	52	76	28	95	71	183	42	270	73	255	66	249	155	248	51	281
ENSMUSG00000003573	Homer3	350	395	347	462	248	386	181	246	985	467	901	383	354	491	359	695	797	527	890	467	335	532	375	607	807	483	855	463	291	514	313	558
ENSMUSG00000003575	Crtc1	699	567	637	580	580	586	648	651	331	384	355	343	383	510	635	788	373	536	402	510	439	478	446	538	299	494	311	516	1067	608	908	607
ENSMUSG00000003581	Rnf215	297	278	285	343	172	350	210	305	237	301	262	232	171	319	164	424	286	393	277	376	148	313	146	387	248	346	259	329	211	404	153	355
ENSMUSG00000003585	Sec14l2	86	27	91	43	10	14	20	22	124	73	109	11	34	6	32	9	288	19	240	24	57	18	45	19	94	34	126	24	57	11	39	6
ENSMUSG00000003604	Aven	174	128	197	194	238	262	67	287	347	177	373	101	84	211	146	208	309	187	252	197	168	243	102	176	339	177	332	197	209	182	115	180
ENSMUSG00000003617	Cp	2420	3448	1529	3680	913	1728	881	1601	40	457	23	524	1450	483	4475	493	36	1094	71	1234	6403	1891	3850	1567	22	1157	32	1007	5386	1354	4751	621
ENSMUSG00000003623	Crot	1456	663	2050	954	877	452	1043	705	958	270	1101	453	1002	772	1142	981	827	740	991	775	1472	539	1186	624	818	634	817	606	1207	597	1149	692
ENSMUSG00000003644	Rps6ka1	1961	98	2300	233	1371	75	1296	77	2244	332	2421	172	2397	323	2791	491	2612	46	2580	34	3431	94	3360	83	2447	147	2501	178	2215	118	2750	312
ENSMUSG00000003657	Calb2	0	0	0	0	0	0	0	0	0	0	0	0	0	2	0	0	0	0	0	0	0	0	0	0	0	0	0	0	0	0	0	0
ENSMUSG00000003660	Snrnp200	6395	3635	7805	4961	4623	6804	3467	5709	5496	1536	4921	1591	2505	3177	3138	3907	6258	3342	6178	2937	3171	3151	3117	3060	5137	3295	5837	3363	3527	3319	2517	3479
ENSMUSG00000003662	Ciao1	475	325	646	537	234	418	229	405	391	218	413	232	204	311	242	438	368	416	375	307	250	251	251	285	342	346	420	350	366	336	220	261
ENSMUSG00000003665	Has1	88	7135	67	818	1658	8323	853	7176	15	2179	14	3091	63	4049	47	2868	44	4435	47	10141	142	3791	72	1903	15	2739	13	3836	415	5633	81	5567
ENSMUSG00000003680	Taf6l	494	370	511	316	323	336	415	352	555	540	555	343	412	403	465	521	519	341	525	374	405	346	378	391	549	443	519	423	596	432	528	366
ENSMUSG00000003721	Insig2	944	605	1002	673	409	1053	348	839	558	332	553	453	349	889	401	836	470	776	362	859	485	1132	345	847	547	809	532	848	549	918	343	929
ENSMUSG00000003731	Kpna6	1627	1014	1555	1438	847	1326	634	1171	2435	737	2143	766	491	1279	798	1449	2355	1353	2328	1133	765	1129	790	1156	2148	1150	2064	988	1196	1265	697	1191
ENSMUSG00000003746	Man1a	1335	10885	936	8596	1638	5932	924	5730	173	5530	134	7681	1272	8744	851	7523	265	9721	157	11284	1481	8422	887	8174	354	11423	372	10625	2327	12962	887	9783
ENSMUSG00000003752	Itpkc	1623	2434	1270	654	2797	1516	2529	1483	584	810	677	645	3465	1164	2199	869	850	1246	807	1633	3338	2006	3857	1260	2400	824	1940	1082	1622	1012	2800	2023
ENSMUSG00000003762	Coq8b	350	666	377	328	472	494	567	481	213	270	276	272	275	301	252	345	280	335	277	330	346	364	375	323	263	272	259	374	338	291	317	342
ENSMUSG00000003778	Brd8	1730	1195	1717	1155	1434	1905	1643	1654	929	467	968	564	1172	877	1178	966	1097	985	905	828	1116	1076	1448	1192	869	994	985	861	1289	979	1331	965
ENSMUSG00000003779	Kif20a	363	263	437	340	198	267	220	258	1436	208	1458	182	121	276	213	350	1808	180	1801	206	252	227	416	183	1108	280	1285	250	251	239	148	239
ENSMUSG00000003808	Farsa	606	464	726	423	659	699	739	538	1170	498	1236	292	540	526	685	618	1238	552	1301	534	719	588	689	427	1089	465	1166	473	610	441	702	521
ENSMUSG00000003809	Gcdh	281	295	329	367	192	292	301	368	197	63	218	131	88	215	167	241	265	253	310	214	170	202	195	189	202	226	213	168	176	289	144	201
ENSMUSG00000003810	Mast2	1373	2227	1072	1566	1737	1533	1505	1527	1912	4254	1769	3312	2767	5717	2787	4474	1726	4609	1286	4341	2800	4525	2488	3281	1881	5361	1984	5155	3241	5502	3028	4753
ENSMUSG00000003812	Dnase2a	530	150	639	252	106	108	143	196	602	229	699	61	316	223	444	378	601	170	602	186	289	380	390	368	505	171	525	175	476	460	549	266
ENSMUSG00000003813	Rad23a	1146	1266	1307	1233	982	1449	972	2580	1823	1183	1879	1017	719	840	940	1054	1672	1223	1559	1180	785	860	816	1003	1680	1039	1707	1029	1029	890	816	938
ENSMUSG00000003814	Calr	5809	6927	7068	6589	10684	14377	9234	13176	9751	7709	9934	9704	16433	13240	17312	12064	9083	8949	9595	8612	17239	8896	13105	9481	7276	7791	7531	7726	16664	11811	17420	10540
ENSMUSG00000003824	Syce2	88	36	91	43	83	50	72	68	282	11	329	31	67	47	100	37	178	13	203	19	102	18	98	33	227	26	206	12	57	18	51	48
ENSMUSG00000003847	Nfat5	16757	16674	12436	13336	19414	9748	17187	13302	7168	9514	6877	8929	19980	15570	18141	9282	7938	16751	7208	13396	20409	17074	17294	10936	7714	13896	8872	14614	13958	8373	18404	13772
ENSMUSG00000003848	Nob1	468	332	613	429	363	396	277	360	854	405	812	313	275	391	394	382	853	350	743	352	233	406	356	259	746	317	792	309	317	242	267	382
ENSMUSG00000003849	Nqo1	264	269	311	516	119	37	96	59	549	115	535	91	63	41	86	46	486	44	620	71	111	74	102	40	538	91	582	100	90	19	72	42
ENSMUSG00000003863	Ppfia3	220	24	183	14	57	9	34	22	249	32	298	31	34	30	32	37	237	15	188	7	17	22	87	16	183	20	259	28	31	18	39	24
ENSMUSG00000003865	Gys1	565	350	563	340	241	227	320	384	680	239	710	252	557	399	671	445	676	370	666	337	652	287	708	415	642	375	674	435	788	471	676	362
ENSMUSG00000003868	Ruvbl2	611	301	856	510	356	361	391	348	1352	374	1316	182	499	401	476	517	1318	291	1464	243	569	260	633	361	1216	356	1357	324	530	322	376	420
ENSMUSG00000003872	Lin7b	25	16	17	8	17	14	39	20	15	21	14	11	9	22	8	25	6	0	7	6	6	27	8	27	15	12	15	7	17	24	13	24
ENSMUSG00000003873	Bax	275	184	291	161	211	138	162	119	358	353	404	323	304	291	234	357	393	266	497	221	247	248	229	249	352	277	378	273	312	313	250	265
ENSMUSG00000003882	Il7r	14	2	5	10	43	4	10	0	0	0	0	0	5	4	4	2	8	0	4	2	0	4	4	2	0	7	0	0	22	5	0	6
ENSMUSG00000003923	Tfam	674	350	778	636	363	566	396	471	767	187	795	182	183	366	305	452	671	460	642	388	244	362	281	340	735	459	679	401	411	346	309	346
ENSMUSG00000003929	Zfp81	631	357	531	545	505	449	391	444	413	166	406	232	304	311	249	261	324	310	356	265	269	313	158	396	363	269	332	185	263	341	224	286
ENSMUSG00000003934	Efnb3	18	200	21	225	37	482	15	334	11	0	5	11	25	73	86	39	6	30	10	31	12	143	8	244	5	20	9	24	242	90	89	51
ENSMUSG00000003948	Mmd	299	1456	253	2525	271	950	210	1077	200	1059	134	1078	38	3782	61	4708	142	1725	188	1677	54	1366	64	1878	159	1530	160	1299	516	1999	43	2620
ENSMUSG00000003949	Hlf	1050	521	994	865	310	1420	139	1468	507	571	582	202	5	182	29	159	381	586	445	558	20	358	34	378	625	698	584	788	52	173	0	136
ENSMUSG00000003955	Fam162a	604	273	814	869	175	212	158	232	3634	1142	3645	695	324	545	312	514	5113	400	6711	409	453	397	240	455	2627	486	2631	649	364	523	283	440
ENSMUSG00000003970	Rpl8	8962	5697	12264	8486	6056	9101	5296	8092	10739	11029	11636	8889	4549	5724	4365	5498	12629	5338	14303	5710	4555	4919	4190	5060	10588	6207	10699	6350	3916	6133	3590	5424
ENSMUSG00000003974	Grm3	0	9	0	12	0	0	0	0	0	0	0	0	0	0	0	0	0	9	0	11	0	0	0	2	0	5	0	2	0	0	0	0
ENSMUSG00000003992	Ssbp2	1706	1155	1669	1353	874	1718	534	1739	642	758	648	876	104	1051	86	913	776	1043	688	1017	83	983	98	1126	721	1224	704	1163	261	851	72	825
ENSMUSG00000004018	Fancl	367	192	407	285	294	125	334	146	607	166	537	121	133	211	199	305	563	170	592	206	165	125	191	187	564	256	467	168	251	247	182	263
ENSMUSG00000004031	Brinp2	5	0	3	2	20	5	20	20	0	0	3	0	0	6	0	4	3	0	4	0	0	9	4	12	5	0	3	2	15	11	0	2
ENSMUSG00000004032	Gstm5	211	310	193	357	267	280	210	225	82	457	96	393	38	2212	61	3335	113	370	151	445	88	360	68	581	96	349	152	333	150	537	77	2093
ENSMUSG00000004035	Gstm7	16	36	23	61	768	29	986	25	13	0	16	41	21	53	54	30	24	40	22	41	29	34	57	46	30	26	34	24	66	40	51	38
ENSMUSG00000004038	Gstm3	44	93	49	86	47	65	58	41	15	21	16	71	0	92	0	43	24	23	16	44	6	37	8	29	24	42	13	31	3	29	0	29
ENSMUSG00000004040	Stat3	5232	9018	4383	4607	15626	23079	14591	19601	2927	3621	2838	4490	5845	6294	6318	5445	2633	5372	2365	5796	8971	7896	6988	5049	2561	5685	2833	5912	6927	6074	6221	6379
ENSMUSG00000004043	Stat5a	584	1278	631	537	2129	1813	1777	3542	2876	1380	3224	866	1550	705	2099	711	2928	788	2605	815	2058	1799	1605	875	4611	1189	4487	1349	2955	749	3480	748
ENSMUSG00000004044	Ptrf	6384	11307	8458	14569	7673	12097	5486	11444	12861	8819	13213	9150	8719	15128	4893	16557	15174	12151	14861	12474	6016	10175	4598	10003	13395	9663	13332	9631	3815	11742	3501	16207
ENSMUSG00000004054	Map3k11	822	345	1106	316	659	423	920	434	874	426	832	323	1093	455	972	582	971	312	899	206	1104	518	1138	462	1024	465	987	423	1053	390	1022	672
ENSMUSG00000004056	Akt2	1219	1908	1373	1758	2092	3329	2048	2705	1354	1245	1469	1319	632	1654	752	1665	1351	1622	1350	1768	889	1803	797	1642	1345	1663	1292	1539	835	1684	697	1739
ENSMUSG00000004069	Dnaja3	1032	1061	1136	892	610	926	681	800	1281	768	1280	766	661	772	819	860	1136	1098	1181	1168	901	850	722	649	1212	978	1203	930	921	743	752	865
ENSMUSG00000004070	Hmox2	556	520	635	586	304	596	286	572	609	364	659	433	354	459	398	540	519	412	522	418	445	444	401	477	572	499	555	475	493	503	338	451
ENSMUSG00000004071	Cdip1	1133	1034	1154	1175	837	1430	891	1332	756	561	839	665	391	787	472	887	763	866	764	889	541	880	506	907	672	972	769	1007	664	947	524	753
ENSMUSG00000004085	Zak	8979	3724	9513	6389	3364	5500	2453	6675	3332	1878	2871	1520	528	5121	788	4181	5306	2471	5380	2646	963	4567	775	4116	4434	2752	4245	3074	2665	3963	672	3821
ENSMUSG00000004096	Cwc15	938	659	1054	872	837	990	696	816	1637	395	1533	524	657	777	731	765	1028	623	1102	719	700	646	603	653	1358	763	1214	735	694	711	566	650
ENSMUSG00000004098	Col5a3	31	2904	43	1006	113	475	43	514	6	1505	5	1812	13	2164	8	2317	13	1438	4	2166	46	3047	42	2851	22	618	9	731	167	2763	17	2728
ENSMUSG00000004099	Dnmt1	2088	945	2386	1518	1822	1030	1820	1148	4321	1204	4386	1158	657	1201	855	1303	4949	1156	4509	897	810	866	1048	794	4578	1539	4449	1484	1100	1055	786	1097
ENSMUSG00000004100	Ppan	501	452	507	216	659	974	705	781	736	312	710	333	208	459	330	417	938	339	691	436	335	671	419	440	615	238	670	232	303	324	317	473
ENSMUSG00000004105	Angptl2	255	3388	307	3281	425	1796	215	1642	91	903	94	906	100	1572	167	2217	306	1472	286	1783	88	4119	146	5288	208	1459	181	1878	612	4448	127	3344
ENSMUSG00000004110	Cacna1e	14	53	3	10	24	232	5	363	0	11	0	0	0	293	4	213	0	3	4	11	32	404	12	483	0	2	0	6	59	495	0	252
ENSMUSG00000004113	Cacna1b	279	32	7	0	14	9	0	18	0	0	0	11	0	10	4	2	0	3	7	6	9	13	0	4	3	5	5	2	5	8	0	10
ENSMUSG00000004127	Trmt10a	312	251	301	150	402	341	358	303	353	156	331	151	146	346	203	278	283	207	255	288	216	380	221	291	305	243	347	165	254	258	191	306
ENSMUSG00000004151	Etv1	257	1214	137	1119	60	188	67	151	126	146	182	232	13	164	32	192	65	581	80	448	63	274	42	366	138	451	158	468	153	419	22	261
ENSMUSG00000004187	Kifc2	126	160	95	156	241	186	291	274	19	73	34	41	96	79	135	136	34	88	31	98	83	130	135	114	28	63	24	64	136	135	161	89
ENSMUSG00000004207	Psap	8318	15990	9509	19126	5716	10041	5596	9076	7295	10022	7694	12472	8275	10863	8296	11332	9784	14394	11091	15525	10859	12699	8949	14612	8750	14391	8484	14864	10379	17300	7724	12587
ENSMUSG00000004221	Ikbkg	1373	696	1739	1105	729	656	743	580	2471	996	2660	1037	1184	600	1649	781	2145	1376	2203	1665	1351	585	1343	621	2296	1702	2291	1602	1814	857	1821	706
ENSMUSG00000004231	Pax2	1557	26	1497	2	986	15	1315	7	391	32	426	21	927	2	1234	22	691	0	522	2	901	6	1448	6	519	9	475	14	1060	19	1217	2
ENSMUSG00000004233	Wars2	385	293	341	326	290	219	234	256	237	83	233	101	291	221	252	268	257	218	326	209	255	218	247	185	197	253	234	266	249	206	207	225
ENSMUSG00000004263	Atn1	3069	3588	2460	3134	2613	4818	2320	4097	1677	2708	1622	2789	1060	2702	1302	2810	2009	3468	1583	3033	1362	2666	1194	2755	1845	3374	1816	3196	1817	3135	1246	2562
ENSMUSG00000004264	Phb2	1891	904	2508	1287	1328	1025	1520	1014	3983	1536	3716	1148	1247	1178	1124	1286	3639	849	3828	918	1294	978	1362	1124	3330	1105	3263	878	1170	1034	1238	1182
ENSMUSG00000004266	Ptpn6	238	36	351	26	132	4	120	26	213	21	238	31	142	59	213	59	214	13	178	24	170	22	173	21	272	33	219	28	216	19	212	55
ENSMUSG00000004267	Eno2	235	694	49	479	175	758	67	667	6	716	14	755	5	612	18	612	13	1313	7	839	32	1074	23	764	5	960	15	981	148	1012	9	699
ENSMUSG00000004268	Emg1	927	600	972	708	808	740	634	677	1757	675	1615	443	528	580	617	665	1364	521	1473	573	705	497	625	453	1261	525	1336	533	640	405	600	478
ENSMUSG00000004270	Lpcat3	802	402	956	489	1147	409	1001	327	885	343	819	282	860	543	908	663	763	391	878	457	1085	367	883	415	630	378	704	372	1324	419	908	543
ENSMUSG00000004285	Atp6v1f	549	360	501	380	547	373	529	298	587	976	619	705	678	641	596	509	447	398	531	448	516	609	588	506	522	457	519	408	685	509	571	471
ENSMUSG00000004296	Il12b	0	0	0	0	0	0	0	0	0	0	0	0	0	0	0	0	3	0	0	0	0	0	0	0	0	2	3	0	5	8	0	0
ENSMUSG00000004317	Clcn5	503	1348	461	793	877	982	1001	755	616	571	568	594	636	1025	578	1027	455	1091	476	1401	705	1322	550	932	613	928	538	890	577	714	461	977
ENSMUSG00000004319	Clcn3	2253	856	2146	867	2168	843	2434	792	2949	685	3084	403	1691	844	2482	939	1983	801	1838	830	2661	794	2125	888	2390	952	2446	1027	3159	830	2547	733
ENSMUSG00000004328	Hif3a	7	27	13	37	17	50	29	43	4	0	0	61	0	24	8	39	0	34	0	63	0	30	12	23	9	54	3	107	10	48	5	31
ENSMUSG00000004341	Gpx6	0	0	0	0	0	0	0	0	2	0	0	0	0	0	0	0	0	0	0	0	0	0	0	0	0	0	0	0	0	0	0	0
ENSMUSG00000004344	Gpx5	0	0	0	0	0	0	0	0	0	0	0	0	0	0	0	0	0	0	0	0	3	0	0	0	0	0	0	0	0	0	0	0
ENSMUSG00000004347	Pde1c	536	66	361	37	47	101	67	130	10	187	7	71	121	12	132	13	11	15	10	17	139	106	75	212	9	12	11	12	172	24	123	11
ENSMUSG00000004356	Utp20	2512	1494	2470	1785	1845	2112	1962	2140	3218	955	3026	896	1193	1750	1610	1846	3673	1817	3724	1566	1688	1671	1792	1460	2612	1353	3194	1397	1721	1780	1428	1762
ENSMUSG00000004359	Spic	0	0	0	0	4	2	0	0	0	0	0	0	0	0	0	0	0	3	0	0	0	0	0	0	0	0	0	0	0	0	0	0
ENSMUSG00000004360	9330159F19Rik	44	787	11	882	0	103	0	86	0	73	0	101	5	10	0	4	0	191	0	214	3	78	0	153	0	253	0	209	3	22	0	4
ENSMUSG00000004364	Cul3	3752	3697	3514	3281	4632	4889	3443	4393	3807	1557	3432	2044	3652	3718	3631	2954	3310	2680	2994	3137	4314	3531	3176	2790	3836	3596	3397	3348	3234	2721	3459	3506
ENSMUSG00000004366	Sst	0	0	0	0	0	0	0	0	0	0	0	0	0	0	0	0	0	0	0	0	0	0	0	0	0	0	0	0	3	0	0	0
ENSMUSG00000004371	Il11	11	46	11	24	24	65	43	112	26	104	25	41	5	79	18	73	24	80	25	133	15	197	4	53	28	145	34	115	12	126	9	87
ENSMUSG00000004383	Large1	710	1172	579	1246	827	785	967	907	262	1059	327	1108	466	1644	351	1414	406	1752	353	1486	323	1429	483	1313	303	1457	347	1462	516	1453	343	1466
ENSMUSG00000004393	Ddx56	661	402	736	537	402	571	467	518	929	447	941	313	374	371	323	542	971	439	902	448	405	385	472	372	869	425	826	392	472	355	393	411
ENSMUSG00000004394	Tmed4	519	745	682	995	462	646	467	633	397	332	429	373	599	572	667	609	332	678	365	690	807	597	782	751	348	533	362	577	891	736	752	547
ENSMUSG00000004415	Col26a1	0	4	5	2	4	30	0	38	2	32	0	0	0	6	0	0	0	5	0	6	0	81	0	185	0	9	0	6	3	0	0	2
ENSMUSG00000004446	Bid	472	135	493	157	264	197	286	191	429	135	402	71	246	149	259	166	409	130	301	144	337	179	345	166	390	153	467	160	389	161	313	172
ENSMUSG00000004451	Ralb	565	458	714	595	808	581	758	489	1138	561	1079	846	1471	817	1107	939	668	924	783	753	1421	764	1205	837	941	957	868	985	971	929	1103	860
ENSMUSG00000004455	Ppp1cc	861	1103	1124	1345	874	1404	748	1095	1272	862	1300	615	428	930	600	1032	1218	1248	1141	1184	702	1380	704	1284	1112	1256	1189	1168	762	1146	511	963
ENSMUSG00000004460	Dnajb11	736	609	700	828	1157	1336	1029	959	1103	613	1096	594	835	1010	1135	806	979	908	927	785	1195	874	857	819	894	718	947	793	1226	1011	1014	733
ENSMUSG00000004462	Tbccd1	290	214	367	320	113	178	153	153	209	115	271	111	71	129	160	206	293	281	243	231	97	197	116	234	261	271	269	290	167	214	119	209
ENSMUSG00000004473	Clec11a	77	575	89	477	10	30	10	90	19	177	16	413	21	221	22	241	8	753	13	785	9	194	23	183	17	235	26	297	45	131	34	288
ENSMUSG00000004500	Zfp324	231	158	319	407	57	103	96	143	169	135	187	121	34	137	82	266	191	278	267	207	51	179	116	223	147	161	162	168	148	198	60	134
ENSMUSG00000004508	Gab2	281	1894	203	1589	841	1450	553	1640	6	872	7	1037	462	1627	366	1547	29	1296	13	1372	388	1913	446	1833	58	1488	28	1544	621	1871	410	2106
ENSMUSG00000004530	Coro1c	1399	1380	1485	2080	989	1755	701	1606	4199	1079	3994	896	1575	1923	1567	2063	3685	1137	3785	1239	1798	1896	1568	2357	3838	1232	3901	1241	1873	2476	1588	1723
ENSMUSG00000004535	Tax1bp1	5901	6979	6481	7215	4814	7019	3577	6220	7780	4804	7541	5406	4968	7606	4460	6595	7132	9597	6619	9004	6205	6425	4014	5503	7769	10208	7325	10242	4474	5681	4325	6949
ENSMUSG00000004540	Psg17	20	4	29	2	0	0	5	4	4	0	0	0	13	0	0	2	0	0	0	0	12	2	15	2	5	0	3	4	22	0	17	2
ENSMUSG00000004542	Psg19	0	0	0	0	0	0	0	0	0	0	0	0	0	0	0	0	0	0	0	0	0	0	0	0	0	0	0	0	3	0	0	2
ENSMUSG00000004552	Ctse	11	0	15	0	40	2	39	2	4	0	7	0	162	6	401	11	11	0	4	4	258	13	266	0	9	0	19	0	350	8	389	13
ENSMUSG00000004558	Ndrg2	556	1089	565	1181	791	2615	515	2653	384	561	424	886	150	2593	284	3889	275	588	381	803	142	1455	165	1429	591	739	525	618	863	1805	207	2803
ENSMUSG00000004561	Mettl17	396	155	339	272	294	216	420	256	204	115	207	91	212	202	309	284	304	237	243	207	261	236	464	300	214	230	225	161	261	212	275	180
ENSMUSG00000004562	Arhgef40	716	2171	684	2074	962	2529	872	2185	229	1463	227	1661	304	1691	281	2061	381	2885	390	2449	193	2480	277	3309	365	1970	303	2010	725	3446	212	1994
ENSMUSG00000004565	Pnpla6	938	459	904	469	722	391	767	484	591	384	544	333	968	721	1149	1215	797	657	675	482	1014	669	1572	728	526	653	651	577	1519	630	1445	780
ENSMUSG00000004567	Mcoln1	534	651	559	708	412	514	548	539	278	976	273	786	424	750	490	1138	350	1116	332	970	360	804	479	926	293	1168	290	1154	605	992	478	869
ENSMUSG00000004568	Arhgef18	2231	1002	2440	1403	883	787	996	760	1052	602	1076	604	1122	971	1394	1553	1087	987	1016	785	1048	701	1336	875	1208	996	1140	1048	1482	1014	1229	1249
ENSMUSG00000004591	Pkn2	3138	3013	3137	3124	3114	3679	2520	3763	3336	1443	3375	1963	3340	3431	2752	2734	2866	2544	2562	2594	3428	3366	2466	2711	3307	2983	3383	2823	2372	2349	2370	2853
ENSMUSG00000004609	Cd33	3	7	0	4	10	4	5	0	0	0	0	11	17	4	4	11	3	0	0	4	0	4	8	2	0	0	0	4	29	10	13	13
ENSMUSG00000004610	Etfb	486	236	664	514	416	259	434	250	1025	436	1181	363	441	654	493	834	897	523	1117	440	422	285	487	345	922	472	977	473	610	415	562	664
ENSMUSG00000004612	Nkg7	0	0	0	0	0	0	0	2	0	0	0	0	0	0	0	2	0	0	0	0	0	0	0	2	0	0	0	0	0	0	0	0
ENSMUSG00000004613	Lim2	0	0	0	0	0	0	0	0	0	0	0	0	0	0	0	0	0	0	0	0	0	0	0	0	0	0	0	0	0	0	0	0
ENSMUSG00000004626	Stxbp2	1502	34	1409	132	1042	130	1391	123	1132	187	1280	91	1920	604	2319	887	1202	30	1132	39	2157	204	2574	244	1184	99	1206	105	2515	281	2737	583
ENSMUSG00000004630	Pcp2	47	9	41	26	24	15	20	7	48	218	60	71	42	22	29	22	39	21	74	27	32	23	42	36	43	26	49	24	22	29	39	13
ENSMUSG00000004631	Sgce	77	2573	55	2967	613	1874	291	1816	8	768	5	1651	462	1605	394	1871	6	2283	10	2648	510	1754	487	2246	26	2266	36	2196	589	2606	334	2057
ENSMUSG00000004633	Chn2	249	41	201	24	106	34	96	80	258	32	267	41	1363	57	1323	92	250	9	231	7	819	79	1044	110	191	17	255	14	218	44	469	71
ENSMUSG00000004637	Wwox	490	254	439	326	468	302	691	324	173	135	176	172	416	248	483	308	214	207	316	204	301	176	427	204	208	187	198	240	464	206	402	245
ENSMUSG00000004642	Slbp	874	2057	710	628	1368	2375	1215	3226	1592	851	1533	1178	864	1154	990	1101	1092	1033	899	1123	1039	1406	951	1128	1462	1398	1298	1241	797	829	799	1084
ENSMUSG00000004651	Tyr	0	2	0	0	0	0	0	2	0	32	0	0	0	0	0	0	0	5	0	2	0	0	0	2	0	0	0	0	0	0	0	0
ENSMUSG00000004654	Ghrhr	0	11	0	0	0	0	0	5	0	11	0	31	0	0	0	0	0	0	0	0	0	6	0	0	0	5	0	6	0	0	0	0
ENSMUSG00000004655	Aqp1	75	13125	141	21860	607	2165	267	3004	10	1941	0	2849	17	572	25	505	16	6525	43	5704	43	1096	64	1582	34	2832	30	4075	464	1844	17	688
ENSMUSG00000004661	Arid3b	84	103	35	88	300	130	291	123	8	32	7	31	171	49	107	66	6	34	10	32	119	53	120	46	3	54	11	54	165	38	119	67
ENSMUSG00000004665	Cnn2	490	1071	650	2093	699	1935	567	1556	1643	1297	1529	997	125	1750	142	1785	1480	2573	1605	2185	91	1606	139	2332	1267	1391	1300	1320	764	3195	72	1838
ENSMUSG00000004667	Polr2e	604	298	746	506	551	368	762	339	1096	571	1132	423	391	453	554	558	1038	368	1025	359	377	346	528	428	905	356	956	386	638	437	642	455
ENSMUSG00000004668	Abca13	0	4	3	2	0	0	0	0	0	0	3	11	0	28	0	16	0	5	4	4	3	0	0	0	0	2	0	4	3	7	13	31
ENSMUSG00000004677	Myo9b	2455	2405	2330	2430	3137	2501	3601	2391	2282	2293	2254	2094	2854	2706	2744	3363	2479	3045	2307	2865	2591	2954	2937	2527	2352	3458	2576	3541	3157	3226	3856	3378
ENSMUSG00000004698	Hdac9	51	148	7	190	465	330	358	607	2	11	3	21	13	135	8	113	3	53	0	59	23	120	23	117	13	20	3	23	104	51	34	46
ENSMUSG00000004707	Ly9	3	0	0	0	4	0	0	0	0	0	3	0	0	14	0	36	0	0	0	0	0	4	4	6	0	0	0	0	3	4	5	6
ENSMUSG00000004709	Cd244	0	0	0	0	0	2	5	0	0	0	0	11	5	16	0	23	0	0	0	0	3	4	0	2	3	2	0	9	0	5	5	10
ENSMUSG00000004730	Adgre1	7	9	3	2	4	4	0	5	0	0	0	11	25	36	0	53	0	3	0	4	3	9	4	2	0	0	0	0	57	51	13	29
ENSMUSG00000004748	Mtfp1	14	22	19	16	0	15	10	4	66	0	45	31	13	16	8	18	44	34	62	22	6	18	12	19	62	13	57	9	22	26	9	13
ENSMUSG00000004768	Rab23	332	1346	375	2002	274	603	229	692	340	270	287	544	79	569	75	874	304	1192	283	1167	57	543	120	700	350	859	294	801	200	711	85	639
ENSMUSG00000004771	Rab11a	1711	815	1851	917	1585	1070	1272	895	3932	830	3812	745	2605	1299	2532	1131	2332	776	2690	869	2664	806	2122	794	3135	1120	3040	916	2098	983	2142	999
ENSMUSG00000004788	Eif2b2	382	182	529	287	290	204	310	177	714	260	710	212	216	297	327	380	791	235	792	224	278	194	307	251	691	296	637	291	350	211	279	279
ENSMUSG00000004789	Dlst	1480	1140	1775	1638	1529	1639	1615	1360	2460	1142	2472	977	1259	1693	1245	1788	2427	1566	2497	1572	1464	1329	1198	1282	2451	1610	2453	1592	1592	1525	1255	1663
ENSMUSG00000004791	Pgf	11	367	5	404	17	19	24	23	13	125	7	192	5	190	0	187	18	594	16	287	17	139	4	115	13	227	11	189	47	297	9	303
ENSMUSG00000004798	Ulk2	1533	2039	1295	2070	814	1710	915	1763	727	1349	746	1400	270	1648	334	1765	699	1904	531	1966	320	1805	446	2078	822	2425	754	2340	640	1861	338	1591
ENSMUSG00000004814	Ccl24	0	2	0	0	0	0	0	0	0	0	0	0	0	0	0	0	0	0	0	0	0	0	0	0	0	0	0	0	0	0	0	0
ENSMUSG00000004815	Dgkq	622	491	607	559	432	535	496	476	558	291	571	282	474	354	507	524	637	588	553	547	363	490	457	530	496	566	597	517	497	576	473	427
ENSMUSG00000004821	Tmed11	0	0	0	0	4	0	0	0	0	0	0	0	0	0	0	0	0	0	0	0	0	0	0	0	0	0	0	0	0	0	0	0
ENSMUSG00000004837	Grap	0	11	0	6	10	5	0	2	0	0	0	0	5	0	4	2	0	5	0	4	6	8	4	6	0	0	0	2	3	7	0	0
ENSMUSG00000004842	Pou1f1	9	6	5	2	24	12	34	12	2	0	7	0	17	0	18	6	6	5	4	7	29	0	15	2	13	7	19	6	26	4	17	2
ENSMUSG00000004843	Chmp2b	1976	960	2022	1407	1127	644	1001	641	1752	457	1735	635	1691	984	1553	843	1220	962	1083	940	2126	873	1302	985	1451	985	1283	937	1913	964	1647	863
ENSMUSG00000004846	Plod3	492	841	595	805	432	848	453	774	676	1443	715	1380	644	1480	646	1403	748	1025	795	1035	739	1227	722	1444	710	1096	697	1116	797	1748	566	1489
ENSMUSG00000004849	Ap1s1	407	160	429	247	159	100	191	130	1212	498	1163	242	827	375	738	487	817	258	964	201	745	185	681	217	945	266	956	211	605	313	714	350
ENSMUSG00000004864	Mapk13	1004	48	1084	94	521	78	634	59	208	135	256	111	1558	61	1794	122	458	13	344	21	1990	43	2013	25	263	23	297	50	1779	43	1656	75
ENSMUSG00000004865	Srpk1	1906	1141	1801	919	1862	1376	1772	1470	2806	913	2474	715	1172	1595	1316	1595	2923	1211	2399	1078	1337	1561	1471	1167	2601	1263	2528	1166	1526	1246	1229	1379
ENSMUSG00000004872	Pax3	0	2	0	14	0	0	0	2	0	0	0	0	0	0	0	0	0	0	0	2	0	0	0	0	0	0	5	23	0	0	0	0
ENSMUSG00000004880	Lbr	1561	1004	1759	1084	1595	2016	1281	1527	3314	633	3135	604	869	869	869	811	3498	908	3534	980	853	869	842	664	2957	1039	2980	1024	816	780	761	766
ENSMUSG00000004885	Crabp2	161	39	161	41	89	29	62	78	1310	146	1269	91	258	32	437	32	1087	57	1267	56	272	67	221	42	1155	63	910	62	326	51	490	22
ENSMUSG00000004891	Nes	53	103	19	103	874	1003	786	931	157	42	160	11	752	438	316	243	101	42	86	95	949	967	962	621	168	25	168	113	307	219	296	303
ENSMUSG00000004892	Bcan	25	17	0	8	17	19	48	12	0	0	0	0	0	30	22	11	0	9	0	6	3	15	0	4	3	2	0	4	31	21	0	8
ENSMUSG00000004894	Hapln2	0	2	0	2	4	4	5	9	2	0	0	11	0	4	4	2	0	3	4	0	0	4	4	2	0	0	3	0	3	4	13	2
ENSMUSG00000004895	Prcc	837	674	914	719	580	1023	601	839	883	623	970	574	603	653	656	651	904	508	884	504	728	801	629	751	964	711	979	709	659	830	549	720
ENSMUSG00000004896	Rrnad1	782	500	758	524	646	646	653	839	604	312	666	403	590	569	671	653	560	604	632	452	654	673	704	640	621	530	614	546	661	416	651	442
ENSMUSG00000004897	Hdgf	2527	1246	2919	1876	1753	1619	1586	1373	5718	2604	5518	1510	2555	2331	2670	1968	4751	1902	4920	1665	2874	1647	2312	1290	5024	1576	5056	1584	2133	1657	2446	1911
ENSMUSG00000004902	Slc25a18	49	61	29	28	60	62	67	145	8	73	7	31	46	41	47	15	16	26	22	39	60	95	60	51	13	97	26	96	80	18	77	24
ENSMUSG00000004929	Thop1	415	278	527	332	284	317	415	271	913	467	930	222	291	399	383	398	976	293	1037	315	346	288	315	308	871	325	821	293	359	361	305	429
ENSMUSG00000004931	Apba3	391	283	413	312	300	504	420	374	496	561	466	554	395	385	344	516	411	444	504	389	306	416	386	504	416	467	410	481	453	457	448	413
ENSMUSG00000004933	Matk	40	83	17	32	139	151	167	109	37	21	27	11	25	18	22	34	26	34	25	53	51	57	45	51	30	28	17	33	36	22	30	29
ENSMUSG00000004934	Pias4	464	301	605	421	432	358	443	374	553	519	575	272	482	299	504	452	576	345	534	366	465	290	483	319	541	346	565	331	474	371	465	328
ENSMUSG00000004936	Map2k1	685	826	692	838	498	725	553	763	1190	955	1185	1229	1537	2187	2113	2302	976	1654	881	1658	1886	1036	1695	969	1091	1584	1153	1534	2752	1229	2602	1645
ENSMUSG00000004937	Sgta	977	807	1090	1012	689	954	677	735	1636	1142	1722	917	707	938	756	1099	1562	782	1850	817	850	774	898	900	1525	923	1466	990	919	1053	685	985
ENSMUSG00000004939	Nmrk2	3	66	5	18	66	72	110	243	0	0	0	21	5	8	22	15	3	11	0	24	12	18	0	12	5	12	3	11	24	2	51	8
ENSMUSG00000004945	Tmem242	350	278	505	522	218	231	224	219	482	436	522	403	175	375	178	477	447	375	491	362	286	322	229	378	490	411	467	449	291	415	191	424
ENSMUSG00000004947	Dtx2	534	402	650	409	406	452	472	455	656	768	602	564	416	690	316	623	861	523	872	478	366	594	434	432	755	502	805	577	279	394	355	601
ENSMUSG00000004948	Zp3	0	0	0	0	0	0	0	0	0	0	0	0	5	0	0	0	0	0	0	0	0	0	0	0	0	0	0	0	3	0	5	0
ENSMUSG00000004951	Hspb1	3260	395	3151	285	3298	1185	2996	889	5545	841	5464	977	1147	1761	667	1908	6592	320	6797	297	1022	471	846	427	7786	486	6954	637	1186	514	516	1641
ENSMUSG00000004952	Rasa4	549	379	623	411	116	164	143	229	266	198	307	162	3577	77	5240	148	624	291	470	219	4125	313	5496	200	473	200	481	160	3459	197	4941	89
ENSMUSG00000004961	Syt5	25	12	0	6	20	5	20	25	0	0	0	11	0	10	4	4	0	5	0	7	32	48	15	14	0	0	0	2	3	10	5	19
ENSMUSG00000004980	Hnrnpa2b1	11034	10376	10992	8277	11587	15375	11467	18638	14066	4057	13947	3956	8960	10320	9668	10497	14928	9334	13033	9098	10358	10247	9341	9339	13064	9228	12914	8424	10274	8104	9743	8798
ENSMUSG00000004988	Fxyd4	407	150	497	55	1084	202	672	389	199	115	229	101	2833	141	2500	117	152	74	172	133	1789	232	1942	83	471	139	404	214	1018	95	1310	113
ENSMUSG00000004994	Ccdc130	255	152	213	150	103	125	162	141	139	73	145	51	121	55	132	160	103	145	111	133	68	101	128	168	111	173	114	134	118	128	136	100
ENSMUSG00000004996	Mri1	297	78	297	140	113	65	172	85	262	281	284	111	175	219	195	217	319	180	286	172	145	127	225	125	278	158	263	190	216	137	220	190
ENSMUSG00000005034	Prkacb	1978	2225	1739	2880	1213	2274	1001	2318	1325	1017	1216	947	150	2029	305	2089	1287	2143	1286	2074	315	2087	292	2342	1432	1890	1474	1844	891	2337	229	2045
ENSMUSG00000005043	Sgsh	277	368	333	466	80	118	120	104	280	581	333	403	158	494	164	528	334	615	393	492	179	218	191	340	335	526	280	579	399	524	309	494
ENSMUSG00000005045	Chd5	413	128	17	117	53	25	15	43	19	0	18	21	42	20	25	22	16	15	22	26	20	32	19	27	7	15	19	16	19	16	17	15
ENSMUSG00000005054	Cstb	1414	706	1673	748	854	747	939	724	2644	2480	2725	1661	1151	1599	1057	1482	1500	799	1690	985	1155	1168	842	1041	2104	1279	1827	1474	987	1172	900	1261
ENSMUSG00000005057	Sh2b2	71	125	63	74	119	196	72	187	40	125	69	121	59	79	68	92	57	118	53	108	80	250	87	166	45	100	68	95	122	128	47	96
ENSMUSG00000005069	Pex5	549	832	601	601	692	1652	905	1392	268	550	298	645	520	1139	458	871	368	849	359	859	564	1582	487	1064	356	694	355	728	577	1107	473	1091
ENSMUSG00000005078	Jkamp	367	402	387	566	201	280	205	336	462	426	449	272	354	426	359	479	375	452	393	406	326	432	307	481	358	464	378	464	462	542	381	415
ENSMUSG00000005087	Cd44	7480	3469	5954	2603	4501	3317	4705	3210	24003	4441	21907	3926	6240	9814	3156	4021	25669	2310	27954	6525	5554	9242	3431	3043	22606	2838	24290	2831	1702	3091	3020	9120
ENSMUSG00000005089	Slc1a2	156	160	25	10	159	55	120	94	6	156	5	192	46	182	39	141	29	49	59	290	63	394	124	153	51	57	66	91	17	46	26	160
ENSMUSG00000005102	Eif2ak4	1287	1225	1122	946	2158	1558	2591	1637	587	633	502	685	420	1324	454	1031	624	966	635	854	453	1239	610	988	551	972	540	1055	736	829	625	1035
ENSMUSG00000005103	Wdr1	4046	2420	4546	2894	9106	4677	10634	3336	7593	2138	7463	1953	13446	4873	9771	5371	7822	3075	8374	3164	13356	3519	10142	3192	7121	2896	7344	2689	10260	4731	10456	4867
ENSMUSG00000005107	Slc2a9	202	96	219	187	76	78	86	94	137	42	165	11	17	18	22	15	191	17	212	41	32	53	23	42	123	37	131	54	68	37	13	28
ENSMUSG00000005124	Wisp1	130	659	47	260	333	477	143	573	19	426	7	423	88	1105	117	693	147	329	114	536	187	794	274	862	56	702	68	846	258	242	127	661
ENSMUSG00000005125	Ndrg1	2791	8555	1579	5006	5911	8906	4467	8390	1854	7937	1862	9130	18448	9922	10991	6860	3046	8237	3052	9561	16905	7624	10920	4715	3139	8432	3013	9444	3912	3830	7669	8562
ENSMUSG00000005131	4930550C14Rik	25	26	39	8	4	17	10	46	15	11	7	11	0	10	4	18	18	9	16	9	6	18	0	25	24	25	19	26	17	10	0	13
ENSMUSG00000005142	Man2b1	1686	1410	1988	1744	775	490	862	713	1067	841	1170	1158	1396	2482	1518	3182	1269	1796	1289	1880	1829	1489	1568	1465	1062	1507	1216	1575	1566	1180	1631	2591
ENSMUSG00000005148	Klf5	8994	604	7913	1491	6286	838	5734	692	3463	903	3556	574	6098	1064	4655	537	3144	182	3497	457	8105	864	3999	361	5257	536	4804	690	3016	231	4426	581
ENSMUSG00000005150	Wdr83	609	473	780	454	472	427	486	441	751	478	730	393	387	440	504	560	797	490	635	541	479	469	517	413	744	483	708	466	504	423	431	527
ENSMUSG00000005161	Prdx2	1344	1241	2038	1338	1071	1121	1053	1578	2709	1899	3071	1410	1350	1668	1330	1954	2859	1037	3384	1180	1679	1150	1430	1488	2362	1206	2587	1250	1533	1612	1428	1524
ENSMUSG00000005198	Polr2a	4362	7291	4321	6990	5275	6809	5282	9141	4749	2532	4506	2829	3963	3544	4404	3696	4774	4007	4834	4233	3904	3626	3719	3903	4006	2924	4556	3266	4460	3556	4046	3588
ENSMUSG00000005202	Shbg	0	2	0	0	0	0	5	0	2	11	0	0	0	0	4	0	0	0	0	0	0	2	0	2	0	0	0	2	0	0	0	0
ENSMUSG00000005204	Senp3	738	955	848	985	982	1291	981	1080	1174	488	1028	564	682	678	922	793	1056	866	1138	738	770	941	895	847	1079	743	1000	702	875	862	756	809
ENSMUSG00000005220	Corin	9	22	5	12	10	4	5	2	17	0	18	11	0	10	8	6	13	9	10	11	0	8	4	6	30	15	28	11	17	2	0	8
ENSMUSG00000005225	Plekha8	418	266	415	405	307	442	253	400	295	187	256	292	702	608	731	885	191	487	154	394	572	430	431	402	255	608	227	463	476	758	685	688
ENSMUSG00000005232	G6pc2	0	0	3	0	0	0	0	0	0	0	0	0	0	2	0	0	3	0	0	0	3	0	4	2	0	0	0	0	0	0	0	0
ENSMUSG00000005233	Spc25	134	11	183	28	96	9	96	15	522	21	471	0	42	49	61	53	437	7	433	4	66	25	87	14	416	31	433	40	59	19	34	20
ENSMUSG00000005237	Dnah2	42	85	41	64	234	164	339	232	2	11	5	0	71	22	50	9	0	42	4	41	26	39	19	42	3	7	7	38	115	24	148	40
ENSMUSG00000005251	Ripk4	3862	96	4956	545	1210	57	1477	18	3469	457	3479	141	1845	88	1553	71	3534	19	3574	44	2721	22	1920	8	6001	283	5700	415	1397	76	1728	48
ENSMUSG00000005262	Ufd1l	771	609	770	865	626	937	715	761	833	613	875	514	507	680	532	746	871	701	792	687	425	615	453	670	797	751	817	712	556	641	587	626
ENSMUSG00000005267	Zfp287	112	337	107	508	103	232	86	334	4	115	3	81	5	82	11	136	21	203	22	239	9	120	8	229	5	208	9	180	36	139	9	109
ENSMUSG00000005268	Prlr	257	1869	313	1803	165	92	143	112	46	7014	16	9785	17	2765	43	3404	1598	10026	83	7597	40	757	45	1018	37	16990	97	15884	982	5805	39	4659
ENSMUSG00000005299	Letm1	966	615	976	969	528	580	453	611	2457	779	2285	594	719	799	756	943	2271	922	2273	696	683	560	644	643	2180	891	2295	865	870	807	642	838
ENSMUSG00000005312	Ubqln1	2933	1489	3019	1805	1707	1690	1681	1583	4453	1567	4255	1460	2094	1941	2489	2010	3852	1758	3497	1768	2709	1668	2440	1541	3635	1798	3412	1779	2723	1583	2353	1692
ENSMUSG00000005320	Fgfr4	0	26	9	35	10	32	0	7	2	0	0	31	5	14	0	15	6	28	4	36	0	30	4	85	3	9	0	35	8	26	0	11
ENSMUSG00000005338	Cadm3	396	2874	23	2330	80	797	29	724	0	1681	5	2336	9	820	11	1057	8	3269	10	3545	34	1420	23	1552	3	2316	5	2379	172	2293	0	1424
ENSMUSG00000005339	Fcer1a	0	0	0	0	4	0	0	0	2	0	0	0	0	0	0	0	0	0	0	0	0	0	0	0	0	0	0	0	0	0	0	0
ENSMUSG00000005354	Txn2	826	441	1088	752	399	598	481	457	1628	550	1729	403	611	613	515	644	1587	431	1684	472	589	364	539	453	1326	499	1376	468	568	540	511	563
ENSMUSG00000005355	Casp14	25	2	65	20	0	0	10	0	70	32	49	41	5	0	18	0	65	3	47	0	3	0	4	0	113	23	70	23	0	0	0	0
ENSMUSG00000005357	Slc1a6	0	24	3	37	7	34	0	23	2	0	0	0	5	18	0	23	0	5	0	4	3	18	0	23	0	15	0	12	8	35	0	19
ENSMUSG00000005360	Slc1a3	209	484	197	634	126	583	77	473	75	73	74	141	0	143	8	180	149	441	160	436	3	65	4	66	79	214	112	238	10	52	9	192
ENSMUSG00000005362	Crbn	1092	815	1242	1301	778	1162	634	1057	798	229	748	363	678	688	823	748	797	642	875	751	635	653	528	721	731	684	649	673	629	545	495	567
ENSMUSG00000005364	Il5ra	0	0	0	0	0	0	0	2	4	0	0	11	196	8	227	13	6	3	0	2	131	0	139	0	0	0	3	2	211	7	178	6
ENSMUSG00000005370	Msh6	1373	871	1793	834	1177	1084	972	1107	2526	405	2394	333	864	908	784	1006	2101	638	2163	620	756	743	973	634	2515	724	2356	736	863	597	625	858
ENSMUSG00000005371	Fbxo11	3480	4586	2673	3523	4280	4227	3662	4412	2491	1941	2281	2799	5384	3710	4233	3135	2073	3390	1957	4171	5699	4421	4142	2958	2417	3535	2438	3300	3202	3192	3962	3613
ENSMUSG00000005373	Mlxipl	16	41	21	33	208	72	305	78	6	11	7	31	25	34	18	50	13	15	13	41	20	46	30	44	5	25	11	47	50	98	30	62
ENSMUSG00000005374	Tbl2	367	560	377	623	300	393	329	392	484	198	415	353	117	293	231	422	463	734	504	544	247	413	259	457	430	473	488	463	319	402	250	315
ENSMUSG00000005378	Wbscr22	374	251	493	343	327	366	339	314	751	343	728	182	279	313	394	393	678	345	592	250	346	257	367	253	670	312	700	247	408	311	364	360
ENSMUSG00000005397	Nid1	295	20832	287	12509	903	11992	458	11231	26	5250	23	6735	125	11013	117	8623	18	10753	102	12444	640	25780	543	34386	64	7818	47	8231	1474	17794	89	11372
ENSMUSG00000005410	Mcm5	319	116	477	175	432	431	267	308	2678	332	2731	141	237	170	153	241	2817	92	3012	81	221	109	304	70	3027	288	2917	391	218	77	131	160
ENSMUSG00000005413	Hmox1	159	1225	73	154	564	384	448	387	273	2729	278	3352	1824	1937	940	2054	352	2803	261	3474	1869	4123	917	1252	646	2308	664	2652	816	877	887	2879
ENSMUSG00000005417	Mprip	10439	8617	9906	9689	8823	11622	9253	11473	5565	6464	5404	6292	13816	9783	13575	9910	6448	8588	5567	7774	11179	11588	12162	10921	7210	7739	6861	8200	13979	9845	17526	10006
ENSMUSG00000005442	Cic	3719	3060	3372	3027	3703	4570	4215	4458	2742	2843	2853	2004	2302	2466	2507	2875	2956	2839	2709	2712	2214	2829	2664	3160	3341	2885	3425	3081	2923	3763	2809	2801
ENSMUSG00000005447	Pafah1b3	213	71	327	84	287	113	372	122	262	146	384	31	441	147	493	176	211	44	249	36	538	72	438	99	278	41	229	40	338	98	435	140
ENSMUSG00000005465	Il27ra	5	7	5	10	7	37	29	23	0	0	0	0	0	24	0	36	3	7	0	6	0	50	0	44	5	7	0	4	26	40	0	29
ENSMUSG00000005469	Prkaca	936	740	1092	923	636	864	529	711	1002	768	1076	786	420	943	536	1090	1151	866	1157	827	555	588	520	764	1117	948	912	861	708	994	473	961
ENSMUSG00000005470	Asf1b	40	14	51	30	47	24	24	23	378	52	333	11	17	22	18	9	280	11	307	7	20	9	27	8	348	20	351	40	24	7	9	11
ENSMUSG00000005474	Myl10	0	0	0	0	0	2	0	0	0	0	0	0	0	0	4	0	0	0	0	0	0	0	0	0	0	0	0	0	0	0	0	0
ENSMUSG00000005481	Ddx39	881	447	946	378	768	550	929	628	2604	1059	2430	987	2052	1428	2202	1024	2299	1156	2282	796	2695	2129	2499	2040	2214	1372	2345	1252	2693	2038	2775	995
ENSMUSG00000005483	Dnajb1	4057	4166	4149	1500	5262	6908	4072	6644	3565	2791	3929	6604	8686	2531	8179	3692	5997	1929	4635	2685	6752	3984	6540	3173	7615	3271	6437	3434	7635	3002	9532	4165
ENSMUSG00000005493	Msh4	11	19	3	8	33	24	10	39	19	0	7	21	9	14	4	6	8	11	10	11	3	27	30	4	11	7	17	21	17	15	9	11
ENSMUSG00000005501	Usp40	1179	577	904	766	916	719	1101	895	885	364	914	504	416	606	532	756	838	636	847	573	419	695	580	771	672	602	750	605	750	724	528	545
ENSMUSG00000005503	Evx1	0	557	7	475	4	0	5	0	4	893	0	766	0	0	0	0	0	749	0	711	0	4	0	0	0	796	0	1024	0	2	0	0
ENSMUSG00000005505	Kbtbd4	339	251	409	293	172	307	181	243	522	218	573	101	113	174	249	310	483	253	464	236	196	239	217	200	445	208	393	228	244	225	165	212
ENSMUSG00000005506	Celf1	3146	1432	2953	1746	2415	2395	2039	2354	3154	1235	2887	1047	1359	2421	1511	2098	3295	1754	3154	1475	1988	2106	1785	1805	3089	1858	3372	1717	2070	1973	1297	1898
ENSMUSG00000005510	Ndufs3	685	394	962	555	389	411	329	357	1083	488	1245	343	304	551	472	674	999	492	1129	490	468	408	431	442	1091	481	954	524	636	542	469	576
ENSMUSG00000005514	Por	2341	1014	2825	1155	2837	1414	2824	1248	2057	1059	2115	937	4092	848	3227	1020	1521	1323	1565	1323	4329	1336	3842	1073	2470	975	2285	1087	2831	830	3206	1095
ENSMUSG00000005533	Igf1r	7284	6982	6639	6267	9600	11939	8210	12608	4272	2407	4557	2638	2838	3249	3049	2880	3287	2876	3193	3227	2684	4865	2709	3456	4836	3580	5018	3605	3316	3979	2830	3425
ENSMUSG00000005534	Insr	3355	2941	3536	2498	3087	4504	3029	4670	829	976	952	886	1201	1531	1411	1458	820	1541	804	1423	1634	2247	1777	1984	1038	1842	1044	1798	1915	1867	1466	1632
ENSMUSG00000005540	Fcer2a	7	9	7	6	284	5	434	4	0	0	5	0	162	2	18	6	16	3	0	2	71	2	68	6	11	9	15	7	5	0	22	4
ENSMUSG00000005547	Cyp2a5	16	0	17	0	0	0	0	0	11	0	3	0	0	0	0	0	0	0	0	6	0	0	0	0	34	0	30	0	3	0	0	0
ENSMUSG00000005553	Atp4a	11	6	9	2	7	5	5	2	0	0	3	0	21	8	61	6	3	7	7	4	26	4	34	2	3	2	0	2	139	16	85	2
ENSMUSG00000005566	Trim28	3355	3106	4285	2711	3189	4775	2948	4917	5602	3289	5768	2557	2700	3618	3071	4105	6577	2855	6494	2769	3392	4065	3408	3458	6007	3142	6315	3293	3277	3656	2513	3874
ENSMUSG00000005575	Ube2m	800	579	884	601	587	710	553	603	1663	1474	1660	655	740	930	858	1096	1629	855	1556	746	787	660	730	753	1625	861	1611	810	882	887	782	853
ENSMUSG00000005580	Adcy9	264	506	329	531	435	763	462	861	242	270	311	172	75	545	114	639	339	500	365	411	66	515	113	553	261	419	328	466	305	583	123	534
ENSMUSG00000005583	Mef2c	62	693	45	797	640	1032	462	1493	53	218	45	212	50	1496	164	1560	21	423	74	391	66	1701	45	1936	66	340	42	396	1015	1565	30	1379
ENSMUSG00000005609	Ctr9	1803	1990	2042	2095	1700	2309	1639	2383	1883	1422	1888	2316	1974	2976	3769	3734	2106	5342	1908	5450	4283	4070	3098	5414	1883	3176	1732	3227	6227	3014	4050	3054
ENSMUSG00000005610	Eif4g2	21393	26922	21438	21223	23005	33060	17406	34306	36259	17959	34256	18723	16649	27505	19659	26347	31164	26197	27844	26556	22552	30072	18031	28627	31530	25838	30634	24705	22241	26641	16373	26569
ENSMUSG00000005611	Mrvi1	47	3687	71	4525	1895	5417	781	6502	6	2501	5	2960	142	5867	745	7326	16	13990	31	11624	535	9233	494	9582	20	4036	19	3928	3016	5270	292	6229
ENSMUSG00000005615	Pcyt1a	872	1889	856	1965	514	1356	353	1214	982	1474	917	1410	486	2074	667	1806	925	2230	893	2410	847	1748	528	1637	935	2277	933	2176	837	1527	672	2070
ENSMUSG00000005621	Zfp592	1254	2108	1144	1599	1760	2629	1829	2231	778	1370	855	745	1093	1119	1302	1242	773	1829	737	1582	1512	1636	1291	1590	928	1816	920	1765	1444	1780	1293	1348
ENSMUSG00000005625	Psmd4	969	580	1212	820	857	795	734	565	1939	1235	2055	1037	1085	1115	1050	1231	1893	878	1896	783	1056	869	988	773	1775	956	1837	988	1172	1039	1158	1099
ENSMUSG00000005628	Tmod4	99	24	93	16	60	25	86	38	33	32	32	11	75	14	78	30	49	65	40	34	57	48	94	42	22	23	42	21	80	22	60	17
ENSMUSG00000005640	Insrr	5	39	0	10	10	4	20	9	2	0	3	41	5	12	4	8	3	32	4	12	0	27	0	34	7	7	0	9	5	7	0	29
ENSMUSG00000005649	Cabp5	0	0	0	0	0	0	0	0	0	0	0	0	0	2	0	0	0	0	0	0	0	0	0	0	0	0	0	0	0	0	0	0
ENSMUSG00000005656	Snx6	1337	1083	1331	1733	831	937	1001	899	1837	664	1655	816	1039	1123	1238	1322	1544	1240	1436	1359	1121	1252	1123	1771	1504	1305	1430	1058	1346	1345	1166	1030
ENSMUSG00000005667	Mthfd2	58	98	55	43	561	211	491	151	536	177	515	232	175	260	181	197	452	197	510	271	213	227	169	106	477	189	467	144	127	101	110	207
ENSMUSG00000005672	Kit	73	241	29	247	920	431	1653	331	4	1702	7	1833	399	598	334	953	16	2745	13	1820	666	297	577	151	32	4183	38	3155	802	708	355	1012
ENSMUSG00000005674	Tomm40l	183	115	251	235	86	136	115	143	269	135	284	111	204	188	242	192	283	138	353	142	207	129	262	185	261	126	248	110	218	187	191	176
ENSMUSG00000005677	Nr1i3	156	100	201	187	70	111	96	112	242	83	245	111	167	153	188	155	247	122	316	115	187	108	225	142	227	102	210	86	190	162	153	149
ENSMUSG00000005681	Apoa2	0	0	0	0	4	0	5	5	0	0	0	0	0	4	0	0	0	0	0	2	0	0	0	0	0	0	0	2	3	0	0	6
ENSMUSG00000005682	Pan2	1129	728	1158	671	1147	937	1586	1101	687	239	739	252	835	383	869	466	1043	481	786	462	813	611	1044	730	793	493	769	483	968	625	1018	406
ENSMUSG00000005683	Cs	3671	1493	4522	2520	1549	1267	1481	1143	6283	1899	6323	1762	2464	2698	3032	2753	6656	2329	7224	1978	3160	1926	2866	2166	5965	2745	6152	2566	3492	2818	2691	2587
ENSMUSG00000005686	Ampd3	850	1982	609	2022	653	879	686	1088	168	3175	182	3242	270	4313	234	4828	458	11955	332	9706	281	4904	315	4645	291	6214	305	6357	1233	5463	123	4675
ENSMUSG00000005687	Bcas2	1067	731	1048	820	827	719	824	530	1399	685	1527	645	532	615	603	637	1177	694	893	623	674	980	550	856	1593	989	1667	932	729	852	503	661
ENSMUSG00000005696	Sh2d1a	5	9	0	2	14	9	0	15	0	0	0	11	13	6	15	0	0	5	0	7	9	0	0	6	0	15	0	19	3	0	9	11
ENSMUSG00000005698	Ctcf	2200	1459	2084	1936	1140	1399	1058	1368	2041	768	2177	675	707	906	1156	1208	1996	1225	1789	1148	997	1025	1025	1269	1917	1510	2070	1269	1205	1332	917	1041
ENSMUSG00000005699	Pard6a	58	88	55	66	33	37	34	43	48	52	71	71	34	53	32	87	67	40	56	44	15	58	45	57	64	39	42	43	33	48	34	66
ENSMUSG00000005705	Agrp	18	34	17	32	37	42	39	47	24	0	25	0	25	12	15	16	11	7	16	19	20	34	30	33	22	23	17	14	26	27	5	15
ENSMUSG00000005716	Pvalb	0	0	0	0	0	0	0	0	0	0	0	0	0	0	0	4	0	0	0	0	0	0	0	0	0	2	0	0	0	0	0	0
ENSMUSG00000005718	Tfap4	492	258	501	491	188	333	148	350	437	63	560	121	54	86	43	95	427	86	592	149	51	104	53	168	473	123	479	185	92	142	43	67
ENSMUSG00000005732	Ranbp1	1223	615	1349	872	936	992	877	700	4581	924	3949	715	786	1129	866	1126	3285	866	3399	884	881	862	782	736	3591	1020	3311	872	891	854	735	907
ENSMUSG00000005763	Cd247	385	259	385	314	238	265	229	347	255	135	231	141	100	180	171	162	262	189	273	157	210	232	225	204	253	185	267	204	216	200	140	174
ENSMUSG00000005774	Rfx5	909	385	798	460	794	608	562	625	471	332	528	202	374	381	298	470	604	324	605	403	371	453	464	443	630	452	653	488	457	421	402	531
ENSMUSG00000005779	Psmb4	1210	930	1615	1204	933	1185	829	850	2782	1609	2995	1138	1259	1699	1312	1725	2327	1183	2693	1281	1407	955	1254	1073	2506	1372	2549	1317	1242	1234	1162	1339
ENSMUSG00000005800	Mmp8	0	2	3	2	0	0	0	0	0	0	0	0	0	4	0	6	0	0	0	0	0	2	0	0	0	2	0	2	0	0	0	2
ENSMUSG00000005802	Slc30a4	1627	1997	1427	2217	870	2499	448	2177	1954	1577	1675	1420	358	4258	362	2727	843	2995	859	2940	267	2645	244	2153	1894	3192	1926	3095	715	2872	444	3072
ENSMUSG00000005803	Sqrdl	573	678	888	1000	136	538	115	429	742	281	759	484	175	250	171	370	252	632	304	680	122	265	94	417	657	431	563	423	127	419	136	299
ENSMUSG00000005804	Bloc1s6	716	357	836	640	435	401	405	366	611	166	571	242	462	393	568	487	486	395	571	376	558	288	573	389	617	351	635	310	680	448	634	420
ENSMUSG00000005813	Metap1	1190	501	1218	762	1803	654	1920	646	1706	498	1666	373	1226	1211	1631	1038	1297	793	1145	637	1523	845	1433	760	1621	713	1653	709	1751	680	1555	914
ENSMUSG00000005823	Gpr108	736	600	836	768	422	631	524	541	449	540	582	494	732	600	979	719	542	671	617	664	1000	559	928	719	530	698	483	682	1231	829	1145	610
ENSMUSG00000005824	Tnfsf14	3	6	0	0	10	0	0	0	0	0	0	0	13	6	22	4	0	0	0	2	6	2	12	0	0	0	0	0	26	5	17	13
ENSMUSG00000005836	Gata6	14	195	13	88	547	171	153	264	8	63	5	61	30	2628	50	3103	16	88	10	302	46	529	30	451	26	110	78	117	429	829	55	2909
ENSMUSG00000005846	Rsl1d1	2163	1157	2116	1305	1753	2380	1453	1867	4186	799	3934	564	1060	1793	1135	1567	3272	1229	3126	1268	1235	1533	1175	1073	3264	1179	3005	1110	1139	876	904	1249
ENSMUSG00000005864	Cnga2	3	7	3	4	0	0	0	0	0	0	0	0	0	0	0	0	0	0	0	4	0	0	0	0	0	0	0	4	0	0	5	0
ENSMUSG00000005871	Apc	8937	3801	7785	4147	6988	3814	8758	3928	4915	2252	5187	2024	6061	3347	8484	2702	4276	3482	3491	2892	5594	3889	5391	3132	5359	3019	5060	3271	6864	2628	6639	3186
ENSMUSG00000005873	Reep5	2694	2022	2903	3076	653	808	515	743	3552	1681	3537	1349	1458	1795	1383	1693	3896	1936	4172	1924	1453	827	1478	1218	3275	1811	3089	1751	893	1461	761	1685
ENSMUSG00000005881	Ergic3	764	920	1291	1450	505	899	472	758	702	1453	759	1259	914	1289	1043	1488	797	1114	918	1231	1070	981	1011	1077	657	1155	691	1056	926	1331	1039	1328
ENSMUSG00000005882	Uqcc1	497	226	515	374	360	384	329	441	358	156	380	151	283	225	288	282	357	239	387	251	247	236	277	261	346	258	416	259	371	283	288	301
ENSMUSG00000005883	Spo11	9	2	3	4	4	5	5	0	0	0	0	0	0	0	0	2	0	7	0	2	0	0	0	0	0	0	0	0	0	0	0	0
ENSMUSG00000005886	Ncoa2	3533	3616	2945	3138	4655	3769	4910	3868	1636	1505	1722	1893	1434	2177	2004	1897	1503	2918	1378	2555	1863	2324	1916	2527	1809	2906	1871	2831	2320	2682	1804	2394
ENSMUSG00000005891	Prl4a1	0	0	0	0	0	0	0	0	0	0	0	0	0	0	0	0	0	0	0	0	0	0	0	0	0	0	0	0	0	0	0	0
ENSMUSG00000005892	Trh	0	2	0	0	24	168	10	162	4	0	12	0	0	2	4	4	16	0	19	0	0	2	4	2	5	0	11	0	0	0	0	0
ENSMUSG00000005893	Nr2c2	3232	1988	2779	2934	1816	1986	1781	2279	1775	1453	1602	1339	1409	1623	1220	1642	1685	2126	1749	1969	1410	1617	1138	1776	1814	2073	1888	2236	1439	1618	1065	1515
ENSMUSG00000005897	Nr2c1	949	463	1146	671	442	459	520	467	851	218	843	272	308	379	373	465	702	452	730	386	380	373	487	543	757	493	700	454	443	540	364	449
ENSMUSG00000005899	Smpd4	846	698	914	632	847	942	958	941	896	509	826	343	420	561	486	712	933	619	939	574	470	604	655	758	863	681	922	601	654	783	554	634
ENSMUSG00000005907	Pex1	648	451	509	524	495	457	591	505	451	177	424	212	383	440	387	368	440	395	433	325	439	437	506	472	378	382	462	370	406	490	410	444
ENSMUSG00000005917	Otx1	20	12	19	16	10	2	15	7	8	11	14	11	0	4	4	2	6	3	0	6	0	2	8	4	13	10	5	9	5	4	0	0
ENSMUSG00000005936	Kctd20	1065	1288	1098	1318	732	1770	762	1366	1323	924	1289	987	320	1236	341	1242	1277	1219	1148	1303	519	1655	498	1473	1121	1523	1254	1489	668	1364	381	1263
ENSMUSG00000005947	Itgae	47	7	31	8	195	4	324	15	13	21	12	0	200	4	266	9	8	9	22	6	151	9	363	4	7	2	21	9	272	10	364	10
ENSMUSG00000005949	Ctns	411	778	409	878	422	446	391	437	313	405	231	292	329	434	582	400	339	828	301	877	504	731	442	645	267	999	366	914	921	612	625	400
ENSMUSG00000005950	P2rx5	11	51	27	20	43	44	43	93	20	32	12	11	38	67	39	88	21	63	10	49	43	58	49	21	20	34	21	30	54	22	13	42
ENSMUSG00000005951	Shpk	71	86	109	115	30	20	34	13	68	218	60	162	59	47	146	80	47	266	40	342	40	44	42	36	83	301	63	256	225	41	98	53
ENSMUSG00000005952	Trpv1	9	2	7	6	0	4	5	2	4	0	0	11	5	2	8	2	13	17	4	9	3	0	8	2	0	4	3	4	10	2	9	2
ENSMUSG00000005958	Ephb3	1750	1597	2068	2248	1582	787	2010	968	1846	1370	1757	1822	2804	776	1755	704	2823	2011	3043	1771	1639	880	1560	1192	1886	1338	2098	1099	1292	888	1635	673
ENSMUSG00000005968	Tuft1	1048	249	1313	357	3259	497	4696	400	1072	291	968	443	2489	1699	1394	1331	1372	318	1375	300	1846	1299	1661	756	1439	242	1310	319	1109	600	1664	1527
ENSMUSG00000005973	Rcn1	1414	1446	1401	2027	337	1066	362	981	1205	727	1198	786	63	1718	57	1535	1320	1365	1424	1303	77	1422	75	2248	1297	1042	1187	1108	340	2208	13	1544
ENSMUSG00000005980	Dnase1	161	121	165	146	76	186	139	235	99	73	105	91	54	98	57	85	147	97	132	86	71	106	102	93	100	71	93	89	104	109	102	78
ENSMUSG00000005981	Trap1	1697	713	2140	1041	943	1051	1229	942	2320	571	2549	886	781	1238	1082	1402	2912	1077	3006	1022	1045	841	1044	934	2305	1042	2492	1087	1167	1141	938	1223
ENSMUSG00000005982	Naa60	846	733	990	1332	386	586	453	546	1143	706	1170	554	507	930	589	916	1143	1252	1224	1057	697	562	629	868	1475	983	1363	1120	839	1044	676	802
ENSMUSG00000005983	1700037C18Rik	350	259	341	458	122	191	215	182	398	249	422	172	192	346	203	331	422	429	421	376	267	165	292	295	522	335	452	350	352	366	288	265
ENSMUSG00000005986	Ankrd13d	253	86	209	74	83	116	139	149	68	11	80	31	46	90	50	94	88	88	62	76	49	97	64	59	68	44	89	40	61	59	26	62
ENSMUSG00000005994	Tyrp1	0	0	3	10	0	0	0	0	0	11	0	11	0	0	0	2	0	0	0	0	0	0	0	0	0	0	0	0	0	0	0	0
ENSMUSG00000006005	Tpr	7796	4744	7771	5920	5822	5187	5163	5367	7996	1681	7663	2004	4038	4822	4680	5142	7540	4933	5988	4598	4634	4119	4456	4332	7219	5128	6880	4798	4540	3781	3658	4789
ENSMUSG00000006007	Pdc	0	6	0	4	7	2	5	4	0	0	3	0	0	0	0	0	0	0	0	4	0	0	0	0	0	0	0	6	0	0	0	0
ENSMUSG00000006010	BC003331	646	681	804	993	449	681	486	675	680	218	571	453	370	859	476	983	563	876	583	963	485	783	457	920	591	896	462	930	659	717	448	836
ENSMUSG00000006014	Prg4	141	940	155	185	86	121	91	122	164	125	176	61	96	346	139	451	162	115	129	159	88	83	94	78	193	187	179	211	92	215	60	272
ENSMUSG00000006019	Dhx34	341	358	503	473	310	295	467	282	308	332	298	262	308	246	383	271	309	356	240	332	352	227	532	332	305	411	357	399	336	446	372	382
ENSMUSG00000006021	Kptn	119	348	177	138	231	279	191	357	133	115	156	202	63	155	107	180	149	216	172	283	97	215	131	212	113	218	147	175	120	200	115	183
ENSMUSG00000006024	Napa	1487	1973	1823	1365	1957	2337	1867	2027	1645	1702	1844	1410	1504	1478	1532	1699	1785	1789	1945	2081	1750	1866	1531	1803	2002	1961	1854	2029	1704	1836	1567	1645
ENSMUSG00000006050	Sra1	802	933	832	781	939	846	1386	1096	814	945	863	1088	935	883	841	1055	691	893	684	908	906	874	1074	903	634	1041	645	866	814	721	807	843
ENSMUSG00000006056	Calcoco2	0	0	0	0	0	0	0	0	0	0	0	11	0	0	0	0	0	0	0	0	0	0	0	0	0	0	0	0	0	0	0	0
ENSMUSG00000006057	Atp5g1	505	205	756	301	313	303	305	264	1361	716	1347	353	520	405	490	531	1349	228	1442	191	468	230	423	268	1132	253	1189	281	504	305	457	355
ENSMUSG00000006058	Snf8	343	300	393	272	294	345	272	308	620	198	595	272	395	375	344	382	519	285	497	260	368	265	296	251	471	316	538	315	345	275	250	355
ENSMUSG00000006095	Tbcb	345	179	585	369	244	244	196	193	882	374	934	413	324	473	284	565	907	322	841	344	286	278	277	385	835	380	882	379	387	407	309	406
ENSMUSG00000006127	Inpp5k	1002	785	1080	973	623	879	724	938	387	467	442	423	532	625	532	702	447	613	510	707	717	755	573	753	452	679	448	706	853	725	740	708
ENSMUSG00000006134	Crkl	1186	1535	1194	1599	794	1775	710	1572	1296	830	1309	906	516	1094	504	1106	1382	1202	1074	1059	643	1215	633	1086	1339	1362	1340	1282	762	1209	558	1093
ENSMUSG00000006143	Upk3bl	91	4	111	2	57	0	43	9	438	42	573	11	1085	4	1309	25	278	3	387	4	431	6	760	2	416	4	349	6	296	4	786	4
ENSMUSG00000006154	Eps8l1	1509	197	1687	78	2458	149	3353	259	180	63	176	61	3677	53	3021	90	165	57	139	76	3160	155	3038	99	320	115	332	153	1835	102	3278	98
ENSMUSG00000006169	Clint1	2922	2025	2815	2045	2636	2129	2224	1884	5031	1453	5249	1369	6414	2134	6400	1869	3732	2471	3561	2486	8107	2191	6154	1904	4084	2584	3977	2426	6440	1966	6288	2141
ENSMUSG00000006179	Prss16	66	2	39	4	4	2	15	4	90	11	103	0	5	12	0	9	103	0	114	4	0	2	0	0	75	5	68	6	10	7	5	6
ENSMUSG00000006191	Cdkal1	890	422	718	557	771	555	996	586	438	332	475	292	441	471	554	424	442	427	510	409	377	409	457	451	411	422	399	427	575	404	583	426
ENSMUSG00000006200	Rhox6	0	0	0	0	0	0	0	0	0	0	0	0	0	2	0	0	0	0	0	0	0	0	0	0	0	0	0	0	0	0	0	0
ENSMUSG00000006204	5430419D17Rik	3	4	0	0	0	2	0	0	4	0	3	0	0	2	4	0	65	0	7	0	0	0	0	2	3	4	9	2	8	0	22	4
ENSMUSG00000006205	Htra1	415	5849	459	10073	215	2384	201	1915	2179	7159	1937	6594	63	6064	181	4872	1978	6134	2022	7627	451	15780	558	22940	2385	6199	2205	8007	1524	12016	262	5180
ENSMUSG00000006215	Zbtb17	602	300	668	278	327	320	358	352	469	322	502	343	362	385	288	396	612	316	574	236	306	457	446	394	530	357	500	374	364	413	368	397
ENSMUSG00000006216	Clcnkb	0	2	0	0	10	2	10	0	0	0	0	0	0	2	0	4	0	5	4	0	0	16	0	14	0	2	5	0	3	2	0	6
ENSMUSG00000006218	Fam131c	20	2	17	0	7	2	20	2	6	0	9	11	0	0	8	0	6	0	13	0	0	8	0	0	0	0	9	2	10	0	0	0
ENSMUSG00000006219	Fblim1	60	291	59	444	732	1048	701	879	422	229	386	162	993	631	983	502	221	176	289	98	932	1408	1025	1477	301	147	378	192	1451	1248	934	677
ENSMUSG00000006221	Hspb7	11	64	7	117	139	240	58	353	2	706	5	705	34	1381	156	2277	0	891	0	605	23	285	8	253	9	1044	7	1238	413	465	34	1287
ENSMUSG00000006235	Epor	3	0	9	0	7	7	5	5	6	11	5	0	13	6	4	4	0	3	0	4	0	9	4	8	5	2	5	4	12	10	9	0
ENSMUSG00000006241	Ccdc159	77	37	77	59	89	103	101	138	40	21	38	21	17	69	25	95	39	65	31	75	23	95	23	110	32	65	42	50	45	107	51	84
ENSMUSG00000006262	Mob1b	3089	1666	2751	2043	2145	2299	1224	2282	4372	1266	4067	1128	2833	2330	2932	1815	3241	2262	3359	2082	3338	2415	2484	1723	3830	2430	3983	2278	3122	2051	2505	2264
ENSMUSG00000006269	Atp6v1b1	93	9	69	12	14	7	15	18	10	0	5	0	17	8	8	9	11	7	7	11	0	13	4	4	30	10	3	6	73	8	0	2
ENSMUSG00000006270	Vax1	0	135	0	134	0	2	0	0	2	125	0	141	0	0	0	0	0	132	0	108	0	0	0	0	0	95	0	98	0	0	0	0
ENSMUSG00000006273	Atp6v1b2	1289	988	1284	1090	1773	1032	1429	826	1648	799	1593	715	5334	1882	4631	1651	1277	1018	1273	1305	6720	1352	4299	1058	1617	1107	1472	1039	3412	1147	4688	1402
ENSMUSG00000006276	Eps15l1	1864	1235	1857	1438	1555	1419	1877	1590	1385	820	1500	745	1226	1225	1404	1365	1569	1434	1669	1180	1407	1548	1400	1507	1479	1382	1481	1293	1212	1307	1250	1299
ENSMUSG00000006281	Tep1	1414	1044	1399	1179	1371	954	1877	1261	816	716	877	927	1168	1064	1482	1505	1079	1397	1123	1175	1116	966	1639	1265	771	1150	968	1121	1364	1301	1373	1310
ENSMUSG00000006288	Ttc5	435	311	495	390	333	262	305	289	242	218	271	151	266	221	305	301	316	312	418	258	315	264	386	362	278	234	292	250	392	335	296	247
ENSMUSG00000006289	Osgep	371	249	405	328	346	279	339	308	373	260	433	151	104	284	231	336	440	297	485	377	148	309	206	338	382	237	408	307	247	261	174	245
ENSMUSG00000006299	Aamp	1410	1385	1962	1361	1378	1753	1343	1604	1844	913	1990	977	1500	1513	1663	1606	2091	1486	2037	1513	1707	1929	1377	1501	2068	1385	2085	1378	1573	1590	1690	1764
ENSMUSG00000006301	Tmbim1	2224	2516	2568	2008	1947	1756	1958	1990	2680	2449	2880	1953	4412	2222	3521	2020	2720	3315	3068	3492	4470	2643	3319	1744	2873	2567	3036	2766	3237	2235	3611	2240
ENSMUSG00000006304	Arpc2	5162	1918	5629	2535	3242	2164	3043	1876	9052	2459	9036	2447	5143	3167	4808	3416	7049	2331	7236	2530	5761	2159	4044	1829	8178	2763	7810	2544	4772	2413	4604	2882
ENSMUSG00000006307	Kmt2b	2589	1827	2579	1665	2333	2665	2943	2862	1554	1536	1547	1269	2131	1178	2145	1729	2057	1783	1641	1468	1982	1594	2544	1861	1792	1946	1795	1755	2276	1918	2543	1560
ENSMUSG00000006310	Zbtb32	11	27	21	8	14	22	24	13	8	21	3	0	21	4	11	8	8	7	0	7	9	13	4	10	9	9	11	6	31	11	9	10
ENSMUSG00000006311	Etv2	0	4	3	0	0	0	5	0	2	0	0	0	5	2	0	0	0	0	4	2	3	0	0	0	3	2	3	0	0	0	0	0
ENSMUSG00000006313	Upk1a	714	22	822	12	73	17	177	17	79	0	74	21	17	6	22	4	52	23	114	31	20	15	23	10	407	25	206	11	143	15	39	15
ENSMUSG00000006315	Tmem147	604	200	752	359	211	168	239	153	1230	613	1139	393	441	451	351	502	1074	431	1356	347	388	281	390	398	930	300	998	315	497	405	431	375
ENSMUSG00000006333	Rps9	8577	5660	12634	8403	8045	7805	8020	6896	10202	11620	11268	9603	5180	6564	4549	6055	12398	5311	14618	6343	5232	5950	4789	5635	10508	6310	10560	6728	4685	5892	4063	5474
ENSMUSG00000006335	Tfpt	130	96	189	121	116	105	105	106	182	94	162	121	100	94	167	124	149	132	151	123	117	106	128	106	168	161	124	137	136	126	127	64
ENSMUSG00000006342	Susd2	404	745	161	814	439	236	353	314	17	540	9	685	25	526	57	763	18	441	4	674	40	699	34	1028	37	544	24	639	186	714	51	711
ENSMUSG00000006344	Ggt5	36	515	55	415	169	548	48	604	46	2770	34	3111	25	4510	54	5209	54	2807	47	2407	88	4533	90	5175	56	4131	45	4019	722	7170	34	4767
ENSMUSG00000006345	Ggt1	88	7	117	55	57	5	34	4	128	21	149	31	38	6	64	2	216	3	108	16	66	16	72	8	87	10	105	11	129	4	72	0
ENSMUSG00000006356	Crip2	1781	716	1869	576	1707	322	1539	342	464	426	491	252	736	826	639	711	465	187	332	332	669	304	805	355	541	316	624	273	1107	305	566	715
ENSMUSG00000006360	Crip1	631	1183	541	969	630	156	448	268	496	2324	506	1822	1380	3093	883	3893	383	866	418	1335	742	436	853	711	490	1425	471	1027	978	578	900	2898
ENSMUSG00000006362	Cbfa2t3	64	332	43	268	175	1032	201	1061	4	63	3	81	9	371	15	507	6	107	0	128	12	655	19	726	5	54	3	83	94	231	13	500
ENSMUSG00000006369	Fbln1	661	37808	1116	42744	2544	13470	1153	12721	3398	8020	3233	10942	5488	5972	5098	7398	4463	24120	4865	21970	9169	10363	8036	9756	3768	15181	4363	15537	4933	8317	4730	8211
ENSMUSG00000006373	Pgrmc1	1774	3705	2571	5054	1700	4754	1362	4474	2475	1712	2478	2386	1076	1990	990	1913	1808	3453	2181	3597	1121	2535	924	3013	2055	3253	2003	3185	1210	1921	989	1791
ENSMUSG00000006378	Gcat	213	101	247	187	99	158	81	185	1487	457	1686	141	75	71	89	55	1310	82	2025	110	83	72	109	57	1074	155	1170	141	115	60	85	55
ENSMUSG00000006386	Tek	20	999	11	272	257	184	410	222	2	42	5	91	0	41	0	30	6	170	4	236	17	174	19	210	7	52	0	55	261	110	5	22
ENSMUSG00000006389	Mpl	0	2	3	0	0	0	5	4	0	0	0	0	5	0	4	0	0	0	4	0	3	2	0	0	0	0	3	0	5	0	0	2
ENSMUSG00000006390	Elovl1	681	795	968	1029	468	393	577	363	1634	1038	1571	655	885	908	873	1145	1580	1240	1829	1103	884	669	708	689	1367	1071	1628	932	982	915	841	1050
ENSMUSG00000006392	Med8	356	90	295	202	277	168	210	132	642	115	662	111	262	233	277	284	411	147	562	142	332	160	262	165	564	206	536	165	256	181	250	189
ENSMUSG00000006395	Hyi	128	204	179	241	132	201	148	272	144	353	149	192	75	176	89	276	152	193	166	164	68	144	131	178	151	201	137	170	99	153	64	201
ENSMUSG00000006398	Cdc20	106	83	179	70	113	126	158	179	1408	415	1465	101	84	69	86	85	1790	23	2003	41	227	71	285	57	1242	99	1283	120	141	48	60	80
ENSMUSG00000006403	Adamts4	66	3618	145	983	3229	6352	3029	11569	10	1930	3	1863	117	7526	57	4195	24	1873	93	2538	269	15093	165	7103	0	1515	7	1467	1723	9621	72	7864
ENSMUSG00000006411	Nectin4	1195	11	1787	22	145	10	281	2	1245	11	1161	71	507	10	614	13	802	11	1135	16	366	13	599	4	956	25	886	28	479	7	566	17
ENSMUSG00000006412	Pfdn2	347	300	367	332	422	535	429	416	564	208	528	222	304	307	351	238	393	266	405	255	318	322	277	259	532	295	425	307	418	241	406	290
ENSMUSG00000006418	Rnf114	898	436	1473	704	699	1081	658	810	825	664	963	635	885	838	667	936	1043	642	1025	509	1334	1039	1209	988	1030	751	941	702	846	758	790	748
ENSMUSG00000006423	C330007P06Rik	813	725	902	938	537	841	601	831	894	301	812	383	462	740	585	756	763	749	816	731	575	746	577	755	801	740	779	767	579	700	524	795
ENSMUSG00000006435	Neurl1a	202	295	69	37	152	217	86	310	46	52	20	101	104	108	117	83	44	69	34	125	88	104	139	95	45	128	74	149	134	76	51	87
ENSMUSG00000006442	Srm	505	362	493	365	409	661	429	481	1685	862	1591	685	208	606	302	514	1557	636	1580	606	193	515	262	519	1576	618	1546	598	315	465	186	509
ENSMUSG00000006445	Epha2	3513	412	2643	140	7452	485	8486	599	3645	571	3213	474	14880	3677	9151	2658	3033	283	2693	218	14038	1299	9671	615	7625	451	7678	714	7441	528	11487	2253
ENSMUSG00000006456	Rbm14	999	743	1052	679	1055	987	1315	1151	1514	862	1518	604	835	707	759	818	1839	759	1672	637	838	983	1175	843	1396	737	1644	783	797	644	849	661
ENSMUSG00000006457	Actn3	3	21	5	43	7	39	0	31	0	21	0	61	0	75	0	81	0	36	4	46	3	53	4	55	0	34	0	33	17	91	9	140
ENSMUSG00000006462	A530013C23Rik	145	555	175	179	300	467	343	946	24	198	20	141	104	243	142	364	29	508	25	490	125	476	176	321	39	325	47	487	139	184	119	254
ENSMUSG00000006463	Zdhhc24	119	115	171	142	57	55	53	51	99	42	74	182	59	120	100	189	70	109	71	117	134	104	87	121	79	124	89	132	169	187	85	149
ENSMUSG00000006464	Bbs1	253	263	317	425	132	283	196	316	33	73	40	121	42	184	71	269	62	278	93	204	54	146	57	212	49	227	72	178	143	222	39	230
ENSMUSG00000006469	Slc34a3	0	0	0	0	0	0	0	4	4	0	0	0	9	0	18	0	8	0	0	0	0	4	12	0	3	0	7	2	10	2	34	0
ENSMUSG00000006471	Ndor1	1166	491	1387	743	636	679	686	539	989	384	1121	383	852	467	979	632	1256	732	1230	551	802	515	1306	762	1060	594	1088	605	1324	772	1529	460
ENSMUSG00000006476	Nsmf	707	790	577	646	2715	992	3982	823	80	903	71	735	1434	811	1326	994	142	797	114	828	1226	736	1602	862	106	796	93	824	1517	1136	1618	903
ENSMUSG00000006488	Prl7a1	0	0	0	0	0	0	0	0	0	0	0	0	0	0	0	0	0	0	0	0	0	0	0	0	0	0	0	0	0	0	0	0
ENSMUSG00000006490	Prl8a9	0	0	0	0	0	0	0	0	0	0	0	0	0	0	0	0	0	0	0	0	0	0	0	0	0	0	0	0	0	0	0	0
ENSMUSG00000006494	Pdk1	1175	379	1471	712	580	495	829	551	2535	208	2623	172	948	256	1635	261	2060	109	2246	172	1291	188	1246	253	2294	232	2089	245	968	192	1136	286
ENSMUSG00000006498	Ptbp1	6845	10457	7572	6004	9192	13103	8644	13749	14549	8622	13583	8838	8424	9701	8484	8254	14088	11154	13714	10044	12721	9717	9629	9249	13467	9441	13518	9352	8633	9453	7986	9619
ENSMUSG00000006517	Mvd	119	41	159	41	165	22	110	18	257	83	220	51	162	41	185	46	183	53	181	32	221	65	262	48	136	37	145	38	146	48	178	35
ENSMUSG00000006519	Cyba	426	205	629	249	231	133	167	153	8	644	3	403	1188	219	1043	224	6	274	4	280	954	178	868	202	11	250	7	291	788	186	773	209
ENSMUSG00000006522	Itih3	0	11	0	4	37	10	5	33	0	0	3	0	0	10	0	9	0	0	0	12	0	34	4	21	0	9	5	9	10	10	0	6
ENSMUSG00000006526	Tmem110	260	447	297	516	129	303	162	287	266	353	236	172	104	303	103	331	211	460	301	425	119	457	128	508	278	357	284	387	235	559	157	321
ENSMUSG00000006527	Sfmbt1	947	889	772	913	831	1005	862	921	595	488	615	524	432	750	454	545	494	941	415	716	502	1124	419	704	863	988	758	1005	385	667	326	688
ENSMUSG00000006529	Itih1	0	0	0	0	4	2	0	4	0	0	0	0	0	6	0	9	0	0	0	0	0	2	0	0	0	0	0	7	0	2	5	4
ENSMUSG00000006538	Ihh	3	4	3	2	106	5	305	9	0	0	0	0	9	0	15	4	3	3	0	2	6	11	8	0	5	4	9	2	5	5	13	6
ENSMUSG00000006542	Prkag3	3	22	3	16	10	24	5	33	11	11	7	0	0	2	0	23	3	7	0	17	0	9	0	14	7	17	3	19	0	5	0	11
ENSMUSG00000006546	Cryba2	0	0	0	0	0	0	0	0	2	0	0	0	0	0	0	0	0	0	0	4	0	0	0	0	0	2	0	0	0	0	0	0
ENSMUSG00000006567	Atp7b	453	14	521	18	287	17	524	20	17	83	7	51	129	14	362	11	8	28	0	83	151	13	139	8	37	174	30	115	504	29	423	13
ENSMUSG00000006570	Defb2	7	0	3	0	0	0	0	0	0	0	5	0	0	0	0	0	0	0	0	0	0	0	0	0	0	2	0	0	0	0	0	0
ENSMUSG00000006574	Slc4a1	0	0	0	0	0	2	0	2	0	0	0	11	5	0	4	0	0	0	0	0	0	2	0	2	0	0	0	0	0	2	9	4
ENSMUSG00000006575	Rundc3a	108	36	25	14	24	25	15	28	37	21	36	21	9	28	22	37	29	17	28	19	23	51	15	36	26	15	19	9	24	33	13	24
ENSMUSG00000006576	Slc4a3	279	452	205	444	208	467	234	536	64	685	52	665	30	1008	36	1296	162	839	151	699	34	553	34	687	70	808	82	805	209	943	47	1187
ENSMUSG00000006585	Cdt1	271	246	253	194	307	616	210	447	789	353	770	242	129	237	89	247	933	270	810	196	136	364	210	208	956	292	899	305	188	215	153	391
ENSMUSG00000006586	Runx1t1	18	1817	17	2390	383	1540	96	1718	2	478	0	776	5	797	11	690	0	713	0	1236	51	1222	38	2165	0	788	5	866	232	1544	13	673
ENSMUSG00000006587	Snai3	3	7	3	0	53	4	58	9	13	0	7	0	38	2	18	4	0	3	4	7	34	0	42	0	3	2	7	4	15	0	13	0
ENSMUSG00000006589	Aprt	356	380	483	458	251	538	201	399	940	924	892	625	300	707	341	721	925	538	1019	499	357	557	393	462	837	483	847	540	345	498	313	654
ENSMUSG00000006599	Gtf2h1	916	899	914	867	768	982	762	823	1414	530	1303	524	628	717	671	702	1264	690	1129	807	909	855	592	739	1345	886	1273	798	629	700	575	608
ENSMUSG00000006611	Hfe	170	209	215	400	33	207	72	157	35	11	45	41	30	32	71	22	24	159	65	127	46	108	75	129	49	68	45	98	66	52	47	20
ENSMUSG00000006638	Abhd1	260	332	213	225	218	618	191	612	144	198	154	272	88	276	203	340	175	289	129	315	125	459	98	319	166	290	175	281	193	305	140	321
ENSMUSG00000006641	Slc5a6	341	405	485	475	261	429	258	491	349	384	311	333	183	293	245	335	532	439	473	453	196	432	221	308	422	423	532	439	268	311	157	263
ENSMUSG00000006642	Tcf23	5	34	7	53	93	482	15	730	0	11	0	31	17	159	57	118	3	38	0	36	15	201	4	119	0	9	0	12	143	101	13	129
ENSMUSG00000006649	Nphs1	47	17	39	8	30	7	62	7	31	125	45	91	13	10	4	8	52	19	34	11	6	18	19	14	43	10	30	21	10	8	0	13
ENSMUSG00000006651	Aplp1	159	85	11	59	43	245	24	161	4	21	5	41	42	319	29	306	3	49	7	44	32	285	34	372	5	57	11	64	59	374	26	332
ENSMUSG00000006673	Qrich1	2870	3306	2853	2704	3516	4434	2996	4197	2667	1743	2907	1893	2210	2464	2216	2442	2825	2613	2531	2715	2506	3115	2331	3062	2790	3030	2816	2824	2320	2868	2116	2781
ENSMUSG00000006675	P4htm	27	273	25	210	129	351	139	402	2	104	9	101	17	122	18	129	3	153	0	199	34	139	60	168	7	116	7	160	101	118	43	91
ENSMUSG00000006676	Usp19	2852	2531	3224	2578	2484	4100	2829	3593	2179	1567	2410	1430	2119	2115	2305	2687	2710	2498	2365	2422	2568	2605	2754	2417	2394	2234	2522	2364	2864	2743	2496	2502
ENSMUSG00000006678	Pola1	892	511	916	799	1068	747	986	808	1590	146	1689	302	187	397	156	405	1952	389	1651	376	221	374	240	321	1955	481	1814	452	319	294	220	371
ENSMUSG00000006699	Cdc42	4865	5194	5882	6475	5024	7880	3729	6214	10708	3746	10638	4500	6667	11132	6417	10583	8973	5785	9306	6283	7397	9854	5174	10970	9629	6104	8963	5922	7359	10052	5647	8713
ENSMUSG00000006705	Pknox1	732	1012	670	685	867	2294	510	1985	358	447	418	262	246	459	185	502	712	813	599	776	318	731	266	687	420	636	525	613	312	601	140	545
ENSMUSG00000006711	D130043K22Rik	80	41	0	6	53	7	39	33	2	0	3	0	25	8	32	8	3	0	0	12	9	20	8	23	3	10	3	19	19	5	17	10
ENSMUSG00000006715	Gmnn	912	19	1070	28	76	5	58	12	542	11	542	11	75	24	64	51	278	7	344	11	57	4	60	14	469	29	433	48	78	13	81	22
ENSMUSG00000006717	Acot13	271	204	305	218	228	149	181	332	380	239	375	141	150	215	309	201	244	164	344	236	221	197	173	166	240	161	231	242	289	135	237	149
ENSMUSG00000006720	Zfp184	117	88	113	183	188	226	162	164	24	0	36	21	17	51	25	90	13	13	28	22	15	74	34	125	11	18	11	33	45	101	34	46
ENSMUSG00000006724	Cyp27b1	14	24	21	20	24	12	29	25	11	0	9	0	25	8	15	18	11	17	10	17	15	16	19	12	13	17	7	16	17	18	9	17
ENSMUSG00000006728	Cdk4	1748	1170	2538	1820	1341	1528	1186	1192	4055	2169	4295	1682	1255	2667	1450	2903	4073	1716	4583	1697	1600	2148	1568	2615	4126	1808	4012	1791	1610	2512	1225	2338
ENSMUSG00000006731	B4galnt1	1157	76	1158	187	89	146	210	86	1101	166	1123	91	1517	145	1929	197	1007	32	1022	41	1362	297	924	372	1032	102	903	161	1887	440	2146	180
ENSMUSG00000006732	Mettl1	336	184	333	291	274	262	248	185	502	229	540	121	171	256	206	243	476	218	577	216	176	158	180	217	543	221	404	206	228	203	136	221
ENSMUSG00000006736	Tspan31	692	782	960	1225	511	1247	339	1002	1260	1411	1272	1450	798	1808	887	1707	1179	1399	1439	1412	1130	1406	794	1582	1100	1396	1193	1363	1200	1825	828	1471
ENSMUSG00000006740	Kif5b	6248	3475	6332	3961	5944	4149	4943	3899	12118	1920	11649	2034	6792	4949	8133	4089	9240	4084	9303	3871	7858	4165	6199	3218	10311	4390	10189	4154	7977	3493	6926	4357
ENSMUSG00000006763	Saal1	257	185	249	369	182	242	124	269	322	187	355	162	113	190	139	273	324	241	375	231	125	281	143	287	320	230	336	297	158	253	119	241
ENSMUSG00000006764	Tph2	0	7	0	2	27	2	34	10	0	0	0	0	0	0	11	6	0	3	0	7	17	9	4	2	0	5	0	6	15	2	5	4
ENSMUSG00000006777	Krt23	156	11	205	2	752	12	1077	17	179	21	284	81	84	4	61	2	39	13	31	22	77	2	45	0	750	17	364	0	85	2	115	11
ENSMUSG00000006782	Cnp	1204	434	1158	485	745	232	681	264	555	239	489	182	885	250	912	347	473	245	464	261	1266	195	1403	206	509	247	441	237	896	223	769	247
ENSMUSG00000006784	Ttc25	20	36	11	6	126	35	177	15	10	0	0	0	0	8	8	11	6	3	7	17	6	9	12	6	3	4	3	11	54	4	26	10
ENSMUSG00000006800	Sulf2	3289	3914	3334	4426	1295	1457	834	1143	271	6485	178	7933	2817	6503	2450	6913	1254	12109	1013	10836	3324	4937	3498	9793	574	10153	416	9715	3052	12504	1597	8901
ENSMUSG00000006818	Sod2	1425	1869	1497	979	1157	1291	891	1198	1388	1017	1258	957	599	1756	766	1161	1092	1261	1252	1429	779	1676	648	1035	1290	1541	1128	1590	1231	1372	849	1511
ENSMUSG00000006850	Tmco6	347	103	291	148	192	144	277	135	148	125	131	222	138	157	160	150	121	128	129	113	156	111	214	163	87	105	133	136	153	168	153	127
ENSMUSG00000006906	Stambp	690	308	712	590	376	371	386	308	437	146	477	222	246	260	380	398	414	333	467	315	278	232	307	315	405	348	378	343	378	360	296	297
ENSMUSG00000006920	Ezh1	2242	1356	2250	2169	1341	1766	1615	2069	720	530	764	705	918	744	1057	1092	740	1827	645	1365	1039	1141	1235	1744	776	1354	729	1257	1538	1482	1170	827
ENSMUSG00000006930	Hap1	361	110	321	35	416	73	658	86	24	32	52	11	250	22	128	43	78	13	47	22	224	46	236	31	79	23	112	30	261	22	174	29
ENSMUSG00000006931	P3h4	319	380	465	634	139	245	96	240	2311	758	2232	604	96	1375	93	1613	2168	676	2927	662	97	325	94	534	1883	771	1865	634	183	579	68	1299
ENSMUSG00000006932	Ctnnb1	15973	10126	20687	13741	13530	12982	11201	12161	15065	5520	15780	5446	19390	8823	20311	9026	16532	8141	16962	8480	24947	10691	19154	8834	16104	7149	16100	7663	20254	8513	17978	8338
ENSMUSG00000006941	Eif1b	292	454	319	510	182	462	186	413	271	488	258	403	104	422	171	393	178	523	267	500	94	420	128	440	200	496	189	406	188	432	178	406
ENSMUSG00000006948	Klk4	0	0	0	0	4	0	0	0	0	0	0	0	0	0	0	0	0	0	0	0	0	0	0	0	0	0	0	0	0	0	0	0
ENSMUSG00000006958	Chrd	7	380	9	421	83	168	43	161	4	249	5	242	17	163	43	169	0	544	10	512	17	113	45	187	9	309	5	307	64	102	43	161
ENSMUSG00000006998	Psmd2	2330	1718	3101	1998	1569	2178	1420	1769	6292	1723	5852	1450	2152	2837	2454	3265	5909	2218	5687	2163	2939	2105	2417	2042	5457	2118	5765	2289	2623	2429	2205	2604
ENSMUSG00000007021	Syngr3	126	26	3	10	0	9	10	13	2	11	0	11	0	4	4	6	0	17	0	22	3	6	4	10	0	7	3	4	5	10	5	2
ENSMUSG00000007029	Vars	1460	563	1801	799	729	709	939	674	2286	1131	2261	625	798	1154	1029	1481	2766	983	2804	857	872	808	1183	962	2455	903	2549	950	1088	1105	866	1162
ENSMUSG00000007030	Vwa7	281	19	205	35	66	7	48	12	59	0	69	11	92	82	82	117	108	5	102	6	54	16	128	14	117	7	105	6	43	13	72	102
ENSMUSG00000007033	Hspa1l	27	27	45	14	60	125	34	140	51	11	40	41	63	34	43	59	70	42	71	48	54	71	79	74	68	55	72	71	54	65	39	64
ENSMUSG00000007034	Slc44a4	791	16	1216	4	346	15	386	36	11	42	20	11	2522	28	3067	66	18	0	7	4	2851	30	3165	10	62	4	89	6	3206	113	3366	17
ENSMUSG00000007035	Msh5	82	17	91	4	60	44	67	56	30	0	45	0	42	16	54	29	52	9	68	11	40	23	45	17	39	15	32	18	45	16	34	26
ENSMUSG00000007036	Abhd16a	593	614	686	650	514	633	496	585	444	602	375	705	462	541	529	628	468	596	439	625	544	545	554	572	348	546	422	606	621	681	604	603
ENSMUSG00000007038	Neu1	312	300	411	303	1111	307	1105	360	233	332	284	212	1338	282	1387	403	206	377	231	315	1371	441	2069	404	212	319	271	310	1650	435	1622	360
ENSMUSG00000007039	Ddah2	249	602	339	650	337	416	253	460	24	436	40	383	63	356	64	451	34	515	28	657	91	655	98	696	49	586	38	452	174	852	72	404
ENSMUSG00000007041	Clic1	1862	664	2322	979	1384	623	1343	526	4764	1775	5511	1712	3544	1843	3106	2022	4497	1154	5034	1330	3765	1262	3064	1098	4650	1321	4329	1164	2320	1742	2479	1876
ENSMUSG00000007050	Lsm2	191	132	229	169	162	199	124	151	691	187	637	51	133	157	121	206	491	130	568	122	201	160	135	144	606	136	563	163	160	165	98	127
ENSMUSG00000007080	Pole	400	133	501	229	643	149	772	221	1236	63	1205	101	88	155	86	203	1569	40	1421	71	145	71	161	63	1409	192	1466	214	92	57	106	122
ENSMUSG00000007097	Atp1a2	189	3161	69	3636	241	3426	129	3064	4	125	3	212	457	323	444	371	6	1215	34	1160	620	2406	206	2319	13	216	11	495	889	460	976	518
ENSMUSG00000007107	Atp1a4	3	301	3	150	10	57	10	78	0	11	0	31	9	16	18	18	0	63	0	68	9	34	8	33	3	12	0	36	15	13	22	28
ENSMUSG00000007122	Casq1	11	111	13	33	103	65	53	78	2	11	5	11	50	14	50	20	3	15	0	22	74	30	64	31	7	29	5	26	97	16	123	11
ENSMUSG00000007207	Stx1a	161	63	97	70	60	60	34	78	48	146	69	71	162	96	188	141	85	92	43	58	125	108	214	82	60	115	80	83	94	82	85	96
ENSMUSG00000007209	Ceacam9	0	0	0	0	0	0	0	0	0	0	0	0	5	0	0	0	0	0	0	0	3	0	0	0	0	0	0	0	0	0	5	0
ENSMUSG00000007216	Zfp775	132	132	175	200	43	131	62	167	71	21	52	31	13	38	8	44	36	88	53	98	6	95	4	106	53	78	42	101	31	95	5	66
ENSMUSG00000007279	Scube2	3	163	9	256	93	288	43	410	0	21	0	41	0	53	8	48	3	88	0	56	17	108	4	127	0	91	3	93	57	117	0	66
ENSMUSG00000007338	Mrpl49	468	295	551	464	366	447	353	520	613	415	726	353	225	321	305	407	542	312	632	280	385	273	318	362	632	343	609	319	326	262	338	303
ENSMUSG00000007379	Dennd2c	1717	169	1467	376	561	188	662	235	3044	312	2991	101	682	143	309	99	2689	76	2917	110	439	123	348	74	3891	340	4434	401	190	95	355	114
ENSMUSG00000007411	Mark3	1787	1370	1565	1308	2135	1902	2339	1797	2284	1142	2188	1027	1633	1535	1614	1600	2263	1516	1927	1451	1753	1513	1643	1420	2205	1981	2285	1693	2035	1278	1567	1466
ENSMUSG00000007415	Gatad1	1010	837	1066	1260	600	993	577	876	1755	706	1711	896	486	916	539	850	1415	974	1442	1042	785	727	603	839	1559	1124	1418	1039	671	942	490	757
ENSMUSG00000007440	Pcdha11	211	184	85	252	33	78	15	101	17	63	14	81	5	145	4	204	65	118	25	107	23	406	19	419	34	105	28	101	52	374	5	221
ENSMUSG00000007457	2310003L06Rik	0	0	0	0	0	0	0	0	0	0	0	0	0	0	0	0	0	0	0	0	0	0	0	0	0	0	0	0	0	0	0	0
ENSMUSG00000007458	M6pr	2378	1225	2859	1905	1351	1465	1281	1334	3122	872	3115	987	3548	2353	3868	2532	2550	1758	3086	1485	4745	1590	3577	1827	2853	1557	2774	1565	3687	2374	4084	2063
ENSMUSG00000007476	Lrrc8a	1384	1780	1399	1719	1638	2341	1734	1706	1719	1111	1702	1007	2443	1512	1819	1757	1536	1564	1408	1587	1968	2205	1680	2180	1888	1544	1842	1645	1866	1968	2015	1797
ENSMUSG00000007480	Mc5r	3	22	3	10	14	7	5	15	0	0	0	21	25	6	0	2	0	13	0	4	32	23	19	10	3	5	3	12	26	2	13	2
ENSMUSG00000007564	Ppp2r1a	3177	2828	4373	3539	2820	5121	2462	3676	4771	2210	4834	2225	2173	3110	2238	3395	5028	2724	5034	2590	3007	2571	2728	2542	4995	3062	5226	3054	2876	3480	2066	3061
ENSMUSG00000007570	Fance	354	269	367	309	248	384	277	399	413	467	429	252	117	209	167	220	339	281	408	229	131	209	214	295	367	287	387	279	176	295	178	196
ENSMUSG00000007589	Tinf2	222	251	221	270	455	677	467	640	346	104	342	61	262	151	231	210	304	197	335	223	261	201	232	165	369	205	297	201	225	172	237	151
ENSMUSG00000007591	Tssk4	29	9	19	14	10	4	5	9	20	11	20	21	9	12	15	18	18	15	16	11	6	13	15	16	7	9	15	16	5	10	13	11
ENSMUSG00000007594	Hapln4	3	27	0	8	10	10	10	15	2	21	0	0	9	12	0	9	0	40	0	29	3	25	8	25	0	25	0	36	8	18	22	10
ENSMUSG00000007603	Dus3l	571	394	529	405	468	429	729	428	417	353	449	272	453	354	614	373	463	427	445	425	434	546	704	681	369	404	477	338	565	487	604	388
ENSMUSG00000007610	Gtpbp3	216	182	243	281	116	154	134	172	189	104	222	111	75	213	156	327	237	299	270	187	74	206	165	336	189	218	200	230	188	292	93	259
ENSMUSG00000007613	Tgfbr1	2565	4463	2486	3638	2817	3769	2029	3736	1187	1557	1170	1843	2256	2683	2025	1616	1069	3188	1141	2648	3075	3451	1923	2760	1290	3564	1189	3814	2065	2578	1702	2019
ENSMUSG00000007617	Homer1	830	4184	539	433	4076	7891	3210	10674	1170	1328	1130	1289	1812	3856	1667	2446	1017	1553	813	2299	2081	4751	1269	2159	1127	1647	1168	1804	1941	1306	1441	2775
ENSMUSG00000007646	Rad51c	31	43	29	24	66	37	24	73	91	0	140	81	13	26	11	43	113	44	93	36	0	34	27	31	149	44	89	38	40	29	0	24
ENSMUSG00000007653	Gabrb2	0	11	0	6	10	24	15	41	0	11	0	51	0	110	0	55	0	5	0	12	6	413	15	649	0	0	3	2	12	206	0	80
ENSMUSG00000007655	Cav1	725	3082	664	4430	1088	1189	948	1672	2789	6070	2565	6735	75	6946	160	8314	3002	9932	2997	9450	134	1327	113	1656	3963	8643	3674	8128	978	1933	157	7864
ENSMUSG00000007656	Arpp19	1487	930	1503	1558	821	941	777	776	2995	768	2862	725	931	951	830	980	2142	918	2325	904	881	825	693	881	2457	1047	2375	1019	900	959	647	853
ENSMUSG00000007659	Bcl2l1	920	582	1158	551	554	429	653	447	406	467	367	453	956	694	936	1400	360	565	372	393	1104	344	981	308	399	600	380	505	1057	452	1149	1032
ENSMUSG00000007670	Khsrp	2960	2207	3061	2489	2247	2667	2358	2341	3756	2221	3632	1541	1745	2119	1784	2107	3891	1894	3810	2033	1945	1898	1923	2108	3544	1935	3551	1912	1992	2291	1816	2093
ENSMUSG00000007682	Dio2	91	2862	187	2686	373	6468	77	4605	727	12284	1256	13741	125	11030	96	6482	196	8235	172	7028	343	17628	476	34567	1676	10695	926	9949	1924	14952	212	5239
ENSMUSG00000007721	Ccdc124	224	211	377	326	254	191	272	153	898	415	1003	323	553	319	582	368	699	350	792	283	411	232	565	251	712	340	716	314	495	364	621	353
ENSMUSG00000007739	Cct4	4521	2294	5936	3494	2712	2878	2305	2593	8316	1619	7869	2255	2426	3682	2425	3871	7722	2316	8144	2796	2772	3047	2286	2832	7085	3052	6970	3028	2562	2578	1816	3076
ENSMUSG00000007777	0610009B22Rik	224	101	249	123	119	48	101	78	342	104	338	51	125	141	153	192	193	107	194	90	193	62	188	132	305	126	257	108	317	113	161	104
ENSMUSG00000007783	Cpt1c	60	384	45	367	86	336	58	310	15	747	9	544	9	639	36	899	70	830	53	679	15	534	42	728	20	801	36	731	115	782	9	768
ENSMUSG00000007805	Twist2	11	2986	27	3134	238	1338	77	1269	6	2760	3	2205	25	1023	22	639	6	4341	4	3270	43	1629	38	1771	0	2691	11	2788	122	1381	22	894
ENSMUSG00000007812	Zfp655	1592	2213	1311	1630	2343	2460	1953	2252	1187	1588	1112	1661	1338	3454	1170	2080	1074	2510	1062	2750	1883	4296	1138	2679	1411	2866	1355	3110	1589	2784	1187	3184
ENSMUSG00000007815	Rhoa	5754	6811	6935	8769	4543	6501	3696	5736	9493	5271	9670	5637	6264	8516	6697	7999	7789	5685	8748	6633	7114	5116	5623	5501	9231	6696	8669	7033	7420	7111	6859	7150
ENSMUSG00000007817	Zmiz1	6228	9331	5014	6515	4682	10301	3910	10083	4748	8155	4983	7500	4869	8928	7215	7644	6256	11041	5166	9738	5747	5693	4755	5209	6079	16490	5826	16090	11825	8474	10207	9083
ENSMUSG00000007827	Ankrd26	740	820	587	832	472	1088	434	1109	580	73	588	162	71	383	82	452	486	590	415	450	102	548	83	506	570	560	481	528	188	470	203	438
ENSMUSG00000007833	Aldh16a1	554	283	746	386	396	249	696	237	907	509	835	302	599	280	720	408	1128	293	1378	283	742	362	1055	300	801	322	954	338	708	368	655	379
ENSMUSG00000007836	Hnrnpa0	3056	2842	3502	3219	3048	4275	2801	3130	6103	2158	5540	2094	3124	3321	3333	2813	5401	2594	5377	2385	3505	3007	3779	3175	6424	3075	6227	2710	3630	3948	3379	3307
ENSMUSG00000007837	Prrg2	224	79	257	132	165	98	172	91	277	198	318	81	287	182	249	159	234	120	310	120	196	118	315	146	272	119	238	119	244	162	233	189
ENSMUSG00000007850	Hnrnph1	9093	23317	7118	7926	16202	22562	14410	30894	6604	6059	6398	7137	7282	12569	7140	11599	6721	15088	5500	15895	10833	20273	7692	15577	6795	17544	7520	14772	8362	10515	6631	11120
ENSMUSG00000007867	Ift43	310	216	257	281	257	211	267	193	344	374	353	313	246	426	263	398	339	352	405	357	275	248	345	278	335	385	318	386	359	363	355	350
ENSMUSG00000007872	Id3	742	5095	940	3215	2260	9728	1377	5859	169	3362	182	3705	337	918	369	1104	470	3035	372	3849	309	2700	393	2866	522	3001	471	3711	596	1442	283	1160
ENSMUSG00000007877	Tcap	3	0	3	14	7	0	24	15	0	0	3	0	9	8	0	8	0	0	0	0	0	8	0	0	0	0	0	0	3	7	5	0
ENSMUSG00000007880	Arid1a	8288	5997	6655	4450	5729	5154	6501	5542	4601	3964	5014	2608	3124	3524	4088	3497	5044	4074	4552	3580	3590	5014	4100	4941	5149	5033	5217	4852	4982	4946	3611	4304
ENSMUSG00000007888	Crlf1	14	9	13	41	10	7	5	12	64	73	45	51	208	4	249	13	78	15	142	21	148	11	315	12	32	31	26	74	474	7	727	19
ENSMUSG00000007891	Ctsd	3333	3304	4321	5324	2870	2301	2572	2035	5961	3891	6294	4097	6551	4003	5088	4582	5737	4544	6261	4877	5840	3763	5758	4197	5973	4763	5940	5030	4223	5480	4164	4244
ENSMUSG00000007892	Rplp1	10766	6444	13233	7732	6948	7587	7905	6861	10761	34962	12168	21330	5961	7505	5347	6340	12326	6770	15076	6941	5699	6813	5702	6879	11343	6998	11094	7183	5479	6940	5072	6115
ENSMUSG00000007907	Cabs1	0	0	0	0	0	0	0	0	0	0	0	0	0	0	0	0	0	0	0	0	0	0	0	0	0	0	0	0	0	0	0	0
ENSMUSG00000007908	Hmgcll1	139	31	141	35	66	0	72	2	46	0	60	31	179	4	160	2	13	13	31	12	168	0	191	2	45	4	36	4	122	4	169	2
ENSMUSG00000007944	Ttc9b	31	29	13	10	24	35	20	47	0	11	5	41	13	12	8	18	6	13	0	17	6	11	4	21	9	28	0	12	3	15	0	26
ENSMUSG00000007946	Phox2a	159	59	31	35	73	47	72	67	30	21	25	31	34	63	47	90	29	49	13	38	26	90	53	51	32	41	30	48	75	52	47	40
ENSMUSG00000007950	Abhd8	148	333	177	400	70	255	72	195	120	509	116	323	17	375	25	382	126	393	160	315	63	348	38	519	113	295	110	314	108	466	17	431
ENSMUSG00000007987	Ift22	240	147	183	206	129	174	205	167	133	73	116	131	179	174	227	234	175	122	175	145	187	106	184	136	128	116	105	136	221	140	212	160
ENSMUSG00000007989	Fzd3	677	345	637	466	363	384	310	321	53	73	67	31	50	266	142	284	29	230	37	176	122	446	94	389	60	161	68	163	188	325	77	265
ENSMUSG00000008028	1700008O03Rik	20	4	7	4	14	9	15	5	4	0	7	11	21	6	36	9	6	17	0	9	9	8	12	16	5	7	3	6	17	22	30	19
ENSMUSG00000008035	Mid1ip1	488	1046	658	1293	537	676	524	570	627	592	564	544	707	764	883	781	481	941	537	960	561	411	498	421	604	914	624	860	1599	477	1056	956
ENSMUSG00000008036	Ap2s1	505	184	613	384	300	131	243	123	996	706	1008	363	632	496	596	507	817	322	896	325	725	269	651	408	797	399	813	447	640	452	566	447
ENSMUSG00000008090	Fgfrl1	112	224	141	187	294	389	272	321	73	146	40	182	1093	237	1011	250	88	230	111	214	969	346	1025	317	79	184	47	160	999	325	904	257
ENSMUSG00000008129	4930432K21Rik	20	43	31	35	10	80	24	72	13	0	3	0	0	16	4	15	6	26	19	19	9	30	23	31	7	31	5	48	17	41	13	31
ENSMUSG00000008136	Fhl2	134	125	81	150	1322	351	3134	400	1319	83	1314	192	873	141	252	148	1423	105	1694	204	632	453	427	355	1409	111	1323	137	319	193	275	165
ENSMUSG00000008140	Emc10	879	1047	1106	1322	574	879	458	798	1074	1463	1198	1440	727	1365	763	1330	1102	1167	1451	1158	892	1073	809	1512	1015	1356	1132	1272	1032	1740	697	1238
ENSMUSG00000008153	Clstn3	224	16	119	2	17	179	10	167	0	11	0	0	0	49	0	80	0	3	10	6	0	72	4	55	0	4	5	0	10	60	0	46
ENSMUSG00000008167	Fbxw9	385	199	571	206	551	183	577	200	395	166	426	151	873	286	827	291	589	201	688	165	787	183	958	178	498	237	521	232	699	266	934	248
ENSMUSG00000008193	Spib	36	4	31	4	24	2	20	2	6	0	7	0	5	8	4	6	0	0	4	6	3	4	0	0	0	0	5	4	0	2	0	8
ENSMUSG00000008200	Fnbp4	2457	2457	2130	1547	2804	2599	3582	2770	1421	1453	1431	1309	1841	1955	2635	1938	1629	2099	1387	1830	2375	2872	2709	2144	1305	2425	1537	2130	2304	1711	2657	1954
ENSMUSG00000008206	Cers4	246	834	283	981	432	745	339	929	20	353	14	222	5	539	39	482	144	625	123	618	26	638	12	634	34	541	61	591	127	490	9	500
ENSMUSG00000008226	Scrn3	165	135	185	239	70	153	86	148	344	73	360	141	71	155	100	187	334	241	396	213	60	104	72	166	344	163	278	137	125	132	51	189
ENSMUSG00000008301	Phax	565	488	648	683	343	462	320	389	615	270	664	423	171	317	195	426	558	437	583	398	218	380	289	468	644	566	538	500	354	413	207	357
ENSMUSG00000008305	Tle1	824	1876	800	1684	1891	1975	2477	2428	215	2241	193	2527	810	2503	929	2372	270	1593	286	1722	937	2649	898	2400	325	2408	303	2807	1259	4630	592	2821
ENSMUSG00000008307	1700109H08Rik	209	177	103	88	323	297	291	350	73	146	58	81	212	166	103	146	90	122	86	105	275	199	229	123	89	155	84	146	165	96	115	143
ENSMUSG00000008318	Relt	44	185	27	26	142	188	110	340	48	125	36	101	67	131	100	69	24	80	22	88	71	179	72	104	53	103	42	117	113	74	51	107
ENSMUSG00000008333	Snrpb2	334	279	527	500	304	423	262	311	974	198	972	393	229	358	256	380	612	324	605	335	352	308	270	374	803	396	744	344	397	300	245	295
ENSMUSG00000008348	Ubc	1961	4225	1777	2140	4072	5253	4348	4988	1260	4389	1347	6362	5139	2659	4428	2528	1112	2699	816	3418	3267	2719	2615	2540	2563	3790	1986	3764	3277	3248	3594	3235
ENSMUSG00000008373	Prpf31	578	222	688	382	337	381	334	311	1085	187	1045	222	279	284	334	391	938	266	915	250	343	206	352	295	1062	266	968	307	382	295	300	312
ENSMUSG00000008384	Sertad1	431	1491	461	716	1822	4269	1267	3446	344	1754	280	1661	1355	928	947	902	370	793	329	1074	1229	1438	969	1248	695	1234	580	1346	1029	1342	1014	1097
ENSMUSG00000008393	Carhsp1	929	2484	986	2233	1068	1834	867	1722	1060	1847	917	1923	1035	1668	905	1574	1256	1998	1166	2210	1308	1991	917	1820	1159	2067	1122	1833	1100	2412	870	1679
ENSMUSG00000008398	Elk3	925	800	894	925	626	469	739	502	1111	1245	1010	1541	1787	1187	1784	1134	907	1116	893	1041	1923	838	1568	947	1100	1424	979	1411	1817	1657	1504	1120
ENSMUSG00000008429	Herpud2	1342	2301	1399	2229	1345	3223	1124	2755	976	1391	1036	1631	1367	1882	1160	1662	958	2005	961	2267	1605	2442	1164	2264	1096	2451	1056	2309	1324	1935	1090	1791
ENSMUSG00000008435	Rdh13	475	353	541	343	257	363	272	455	393	281	335	232	200	330	291	338	368	416	430	344	193	443	195	381	456	394	450	305	357	364	376	297
ENSMUSG00000008438	Adam21	3	11	13	2	14	5	10	5	0	11	0	11	9	2	8	0	0	3	0	0	3	2	4	4	3	2	5	4	3	0	9	4
ENSMUSG00000008450	Nutf2	235	123	261	171	178	138	205	127	435	125	438	101	158	209	132	222	339	118	344	137	165	141	195	180	414	145	439	127	167	182	182	142
ENSMUSG00000008461	Fut1	7	2	15	4	4	0	0	0	35	0	18	0	13	2	8	4	62	7	71	0	12	4	8	8	17	2	24	0	40	0	9	2
ENSMUSG00000008475	Arpc5	1520	868	1940	1276	1760	1045	1253	790	3550	945	3423	554	5608	1703	4460	1936	2448	1012	2332	1125	5090	1218	3880	1060	3089	1290	3080	1341	3480	1298	4173	1585
ENSMUSG00000008482	Rnf151	0	6	3	0	4	10	0	9	0	0	0	0	17	2	11	6	0	0	0	4	6	2	4	0	5	4	0	6	5	2	5	2
ENSMUSG00000008489	Elavl2	361	125	27	24	4	20	0	25	2	11	0	21	5	34	0	48	6	19	4	44	12	29	4	33	28	34	17	16	3	13	0	15
ENSMUSG00000008496	Pou2f2	25	58	7	18	57	30	48	38	4	0	3	0	21	8	8	13	6	11	0	26	20	29	12	10	3	17	0	11	24	15	43	22
ENSMUSG00000008540	Mgst1	4870	1719	7108	2438	1167	669	1096	586	237	1287	245	1561	1047	2486	1589	3121	260	1196	295	1685	1900	701	1463	736	388	1296	399	1404	2656	1116	1631	2131
ENSMUSG00000008575	Nfib	13964	9415	11713	9000	6566	1267	6963	2292	6194	4524	6216	5386	3872	5152	6712	6081	7368	6348	7610	7292	4142	2327	5036	2197	6473	7075	6685	6184	9791	3254	6770	5800
ENSMUSG00000008590	Htr3b	137	0	0	2	0	0	0	0	0	0	0	0	0	0	0	0	0	0	0	2	0	0	0	0	0	0	0	0	0	0	0	0
ENSMUSG00000008601	Rab25	1129	21	1719	101	310	12	348	31	1636	239	1711	51	960	10	1007	18	1433	21	1819	12	1045	25	1059	6	1646	84	1779	76	1018	38	993	8
ENSMUSG00000008604	Ubqln4	1377	636	1523	681	824	1141	910	1056	1463	737	1440	363	935	715	1231	709	1490	678	1341	598	1116	857	1228	841	1405	621	1504	553	1453	829	1314	617
ENSMUSG00000008658	Rbfox1	233	46	65	22	4	14	0	12	42	0	58	0	0	20	4	43	11	3	16	19	0	6	4	14	20	0	30	0	5	0	0	17
ENSMUSG00000008668	Rps18	3377	1543	4203	2219	2689	2236	3153	1943	3570	8829	3947	5637	1986	2208	1826	1959	4217	1865	5175	2018	1756	1810	1845	1952	3358	1946	3391	2138	1582	1711	1588	1734
ENSMUSG00000008682	Rpl10	11363	11204	14679	15119	9811	14422	8724	13632	12747	15168	13989	14767	7702	10031	7917	10298	14655	11326	16922	12115	9795	10086	7482	10366	13024	12518	12723	12473	8596	10843	7864	9689
ENSMUSG00000008683	Rps15a	5350	3583	7564	4696	4303	5050	3772	4823	7304	9161	7833	6372	2559	4163	2479	4416	8377	3823	10420	4958	3349	4240	2649	3822	7185	4403	7088	4529	2719	4053	1867	3716
ENSMUSG00000008690	Ncaph2	1592	733	1972	1121	946	1119	939	968	2615	1194	2645	917	873	967	1121	1301	2584	866	2730	845	816	750	1097	828	2663	959	2574	1007	1090	848	993	1015
ENSMUSG00000008730	Hipk1	13442	4700	12390	4581	7742	6640	6429	6189	5153	3455	4905	3272	9293	7058	10739	5288	4381	4847	3963	5098	9435	7118	7766	5168	5365	4517	5809	4866	11945	5797	11056	6603
ENSMUSG00000008734	Gprc5b	273	1318	257	1004	399	1313	305	991	59	384	38	594	25	366	39	340	34	747	65	1019	102	806	79	630	43	449	51	456	85	721	26	438
ENSMUSG00000008763	Man1a2	5201	2842	4870	3370	1872	2356	1867	2708	3603	1391	3625	1450	2052	3581	2674	2943	2612	2529	2700	2493	2616	2968	2357	2998	3163	2568	3011	2378	3534	3160	2298	2964
ENSMUSG00000008789	Ceacam5	0	0	11	0	0	0	5	0	0	0	0	0	17	0	4	2	0	0	0	0	3	0	0	0	0	0	0	0	8	0	22	0
ENSMUSG00000008813	Tppp2	0	2	0	0	0	0	0	0	0	0	0	0	0	6	0	9	0	0	0	0	0	2	0	0	0	0	0	0	3	0	5	6
ENSMUSG00000008822	Acyp1	91	68	123	39	50	47	67	72	46	208	67	41	34	127	29	108	106	99	114	100	37	88	19	89	70	84	101	84	45	76	43	86
ENSMUSG00000008843	Cldn13	0	0	0	0	7	0	10	0	0	0	0	0	0	0	4	0	0	0	0	2	0	0	8	0	3	2	0	0	8	0	0	0
ENSMUSG00000008845	Cd163	29	4	27	6	0	2	5	13	4	0	14	0	0	4	0	2	6	7	7	12	3	4	0	8	11	0	3	0	8	4	0	2
ENSMUSG00000008855	Hdac5	1373	1582	1505	1535	1944	3314	2220	2914	362	1868	615	1188	516	1510	500	1765	591	1148	697	1226	592	2257	779	2313	536	1549	635	1465	764	1692	718	1596
ENSMUSG00000008859	Rala	1017	491	1178	760	669	421	601	305	1823	281	1593	323	1105	533	926	556	1310	464	1442	490	1322	378	891	500	1519	549	1424	437	734	561	672	485
ENSMUSG00000008874	Clec3a	0	0	0	0	0	0	0	0	0	0	0	0	0	0	0	0	0	0	0	0	0	0	0	0	0	0	0	0	0	0	0	0
ENSMUSG00000008892	Vdac3	898	484	940	867	643	484	558	415	1332	436	1269	514	474	744	515	851	1058	684	1218	684	499	508	532	551	1153	719	1098	653	638	658	431	617
ENSMUSG00000008932	Slc1a7	0	12	0	2	10	4	0	7	2	21	3	0	0	6	0	2	0	7	4	9	3	8	4	2	0	4	0	12	0	4	0	6
ENSMUSG00000008958	Vps72	668	286	698	369	323	280	424	230	540	488	673	212	495	250	415	335	517	253	553	223	405	273	502	425	591	264	500	250	415	394	385	270
ENSMUSG00000008976	Gabpa	1814	1955	1901	2543	1760	2682	1358	2503	2437	820	2345	816	1089	1619	1061	1598	2209	1927	1902	1963	1325	1852	1040	1733	2248	1904	2142	1741	1421	1819	1065	1728
ENSMUSG00000008999	Bmp7	297	2176	351	2438	221	2130	277	1214	202	1225	180	1269	9	327	8	227	244	1612	243	1111	32	895	12	1805	208	1460	208	1532	24	611	9	232
ENSMUSG00000009013	Dynll1	2152	2728	2260	1863	1984	2782	1972	3524	6806	3362	6829	3040	2754	2814	2883	3225	5765	2527	6678	2786	2548	2138	2432	2076	5639	2761	5623	2557	2639	1748	2437	2374
ENSMUSG00000009030	Pdcl	674	790	782	952	396	687	396	714	729	281	699	323	345	510	511	552	712	525	697	542	496	494	442	570	731	657	716	588	621	521	541	505
ENSMUSG00000009035	Tmem184b	868	1850	898	1413	1203	1430	1072	1968	576	1266	699	1057	902	1510	919	1405	768	1867	645	1658	1144	1468	1284	1750	615	1809	641	1631	1130	1905	761	1328
ENSMUSG00000009047	Gm5965	0	0	0	0	0	0	0	0	0	0	0	0	0	0	0	0	0	0	0	0	0	0	0	0	0	0	0	0	0	0	0	0
ENSMUSG00000009070	Rsph14	0	2	0	2	0	0	5	2	0	0	0	11	0	0	0	0	0	0	0	2	0	0	0	0	0	2	0	2	0	0	0	4
ENSMUSG00000009073	Nf2	2325	1402	2386	2202	1895	2029	1872	1744	3011	1380	3213	1198	1072	1474	1390	1431	3164	1394	3264	1253	1249	1396	1130	1428	2699	1608	2765	1578	1360	1394	1162	1285
ENSMUSG00000009075	Cabp7	62	17	57	33	37	10	20	34	51	63	60	21	17	12	29	41	36	21	34	14	20	29	64	25	53	31	38	24	26	30	26	19
ENSMUSG00000009076	Zmat5	123	59	197	111	96	52	81	70	184	135	169	91	100	57	135	108	129	69	120	78	71	55	124	63	153	84	171	115	113	99	106	55
ENSMUSG00000009079	Ewsr1	5063	3931	4203	3155	5700	4259	7415	4435	5925	2895	5799	2547	3535	4036	3957	3996	5676	3426	5518	3343	4258	4409	4299	4057	5437	4062	5499	3784	3790	3744	3814	4212
ENSMUSG00000009090	Ap1b1	2033	604	2162	950	999	535	1081	420	2435	799	2849	685	1317	1035	1784	1354	2776	859	2917	726	2039	622	1901	881	2536	888	2507	875	2156	1042	2006	995
ENSMUSG00000009092	Derl3	36	12	9	4	89	108	77	85	6	11	3	11	9	22	15	30	3	7	4	19	46	104	8	117	13	15	7	7	43	88	26	29
ENSMUSG00000009093	Gstt4	0	26	0	14	0	5	0	2	0	0	0	0	0	10	0	0	0	5	0	16	0	6	0	0	0	10	0	7	0	0	0	2
ENSMUSG00000009097	Tbx1	3	6	15	12	0	5	5	5	2	0	7	21	0	0	0	4	21	0	16	7	0	4	0	2	7	5	11	9	5	4	5	4
ENSMUSG00000009108	Gnat2	22	17	11	10	66	15	48	38	10	21	16	31	13	32	22	20	26	44	22	32	15	34	15	38	30	49	30	72	33	19	9	28
ENSMUSG00000009112	Bcl2l13	1149	930	1194	768	1279	1381	1386	1203	3207	934	3199	806	1105	1027	1121	1287	2915	747	3006	892	1325	996	1123	807	2868	1208	2982	1190	1446	837	1234	1118
ENSMUSG00000009114	2610028H24Rik	20	2	15	8	4	0	15	7	28	0	16	0	0	2	0	9	24	7	13	0	9	4	8	12	17	0	17	0	8	11	5	8
ENSMUSG00000009115	Spatc1l	0	0	0	0	0	2	5	0	2	0	0	0	0	0	0	0	3	0	0	0	3	2	0	0	0	0	0	0	0	0	0	2
ENSMUSG00000009145	Dqx1	66	83	49	24	73	63	91	93	35	21	36	21	96	36	47	29	49	34	25	56	43	41	45	50	24	47	47	43	54	29	60	38
ENSMUSG00000009185	Ccl8	5	261	3	125	4	9	0	9	4	9472	7	8597	5	750	4	424	3	1557	7	1592	6	576	15	517	7	3954	15	3872	136	1213	0	576
ENSMUSG00000009207	Lnpk1	642	1276	495	1142	498	1041	401	1074	524	343	433	403	154	483	249	405	391	916	442	746	201	548	214	508	479	920	441	892	310	495	174	462
ENSMUSG00000009210	Prr29	31	24	25	0	43	7	58	23	11	104	3	71	100	36	75	11	8	74	4	39	80	109	79	51	3	34	13	62	80	11	47	33
ENSMUSG00000009214	Tmem8c	0	0	0	0	0	0	5	0	0	0	0	0	0	0	4	0	0	0	0	0	3	0	4	0	0	2	0	0	3	0	9	2
ENSMUSG00000009216	Fam163b	0	6	0	0	0	4	0	7	2	0	0	0	0	2	0	0	0	5	0	0	3	2	0	0	0	2	0	11	0	0	0	0
ENSMUSG00000009246	Trpm5	18	217	19	63	60	166	58	348	30	135	20	111	67	79	68	78	44	84	22	101	117	108	113	112	43	145	57	149	150	145	85	133
ENSMUSG00000009248	Ascl2	33	2	59	18	10	7	24	5	26	83	16	21	25	4	11	0	13	3	31	6	3	9	19	0	26	18	11	12	12	4	17	8
ENSMUSG00000009281	Rarres2	91	3616	211	4899	491	2849	134	2158	77	4534	78	4349	54	1898	100	2310	88	3718	86	4649	117	3033	176	3584	45	2496	87	2451	357	2147	98	2032
ENSMUSG00000009291	Pttg1ip	2690	4020	3842	5008	2465	4408	2577	3919	1423	2895	1436	3534	4042	4303	1922	4151	1146	4634	1181	4894	2936	5351	1878	4217	1752	4495	1730	4561	2288	5350	2792	4615
ENSMUSG00000009292	Trpm2	14	12	5	4	17	0	15	4	0	11	5	11	0	2	0	4	3	0	0	0	0	6	8	2	5	0	5	2	5	2	5	6
ENSMUSG00000009293	Ube2g2	477	399	491	477	412	532	420	428	656	1245	659	886	324	910	366	839	596	918	700	844	422	871	352	1028	623	1173	649	1157	518	1149	393	834
ENSMUSG00000009350	Mpo	0	9	0	8	7	22	24	13	2	21	5	11	5	34	36	48	3	17	0	11	3	11	8	50	5	13	3	14	19	40	17	26
ENSMUSG00000009356	Lpo	3	4	0	2	14	2	10	2	8	11	12	11	848	4	1890	23	3	0	13	0	1215	13	835	4	9	0	53	0	2829	124	2467	13
ENSMUSG00000009376	Met	7014	543	6547	871	5094	384	6015	318	5365	239	4777	443	12441	699	6999	785	3349	172	2712	366	11184	278	7669	93	3904	232	4161	237	4104	135	7023	630
ENSMUSG00000009378	Slc16a12	143	16	145	51	162	24	91	12	3907	301	3747	272	0	301	11	254	1505	63	1859	98	3	280	15	259	3603	324	3773	356	38	215	17	312
ENSMUSG00000009394	Syn2	683	140	0	12	7	10	77	13	4	0	0	11	5	8	32	2	78	17	0	12	26	9	15	4	11	0	7	14	61	0	34	2
ENSMUSG00000009406	Elk1	279	290	245	258	363	379	529	449	193	249	189	151	167	325	164	342	191	356	227	362	182	402	165	391	161	320	177	283	204	418	174	328
ENSMUSG00000009418	Nav1	1177	8358	686	6564	3351	6536	2320	5658	2413	6868	2072	6926	2252	3388	2004	2572	2941	9992	2896	10010	2296	5750	4501	7622	1693	9699	1842	9851	1076	7697	448	4282
ENSMUSG00000009470	Tnpo1	6615	6354	6140	6215	6998	6078	6567	6371	7787	3466	7241	3433	4686	6658	5903	5672	7026	5925	7070	5350	6239	7701	4995	6031	6755	5464	7250	5684	5657	5496	5136	5912
ENSMUSG00000009471	Myod1	0	0	0	0	0	0	0	0	0	0	0	0	0	0	0	0	0	0	0	0	0	0	0	0	0	0	0	0	0	0	0	0
ENSMUSG00000009487	Otog	3	0	0	0	0	0	0	0	0	0	0	0	5	2	0	0	3	0	0	0	0	0	0	0	0	0	0	0	0	0	0	0
ENSMUSG00000009535	Rnmt	940	434	732	500	699	621	748	606	1092	198	1008	313	777	672	841	653	799	425	764	534	940	767	921	579	835	493	912	495	907	515	778	512
ENSMUSG00000009545	Kcnq1	696	9	668	8	900	27	1472	31	6	0	5	11	470	10	596	15	8	0	19	7	504	16	715	2	13	10	21	19	521	11	511	11
ENSMUSG00000009549	Srp14	635	402	660	673	432	424	315	441	823	633	972	705	329	787	415	800	830	655	853	709	451	580	378	745	824	652	756	721	612	797	372	688
ENSMUSG00000009551	6330409D20Rik	3	12	3	16	30	10	5	43	0	11	0	0	0	14	4	16	0	3	0	7	0	34	0	17	0	2	0	16	0	13	5	13
ENSMUSG00000009555	Cdk9	760	768	960	797	936	1147	1058	999	1025	613	961	564	1018	744	1004	760	956	747	1037	765	1065	981	1070	941	1153	861	1054	796	1008	888	1128	751
ENSMUSG00000009563	Tor2a	244	207	335	328	136	212	148	209	442	270	517	262	449	272	561	305	365	308	488	288	448	309	449	357	443	308	500	245	558	460	516	303
ENSMUSG00000009566	Fpgs	451	253	563	324	254	427	353	410	758	384	613	202	158	250	188	366	987	272	1099	273	153	313	203	295	778	343	876	322	263	239	207	297
ENSMUSG00000009569	Mkl2	4277	1719	3842	2264	3101	1611	3996	1820	4046	799	4517	776	1031	1392	1227	1565	4266	1325	3911	1253	1495	1559	1729	1437	4145	1480	4031	1525	2555	2035	1348	1502
ENSMUSG00000009575	Cbx5	2835	3371	2619	5360	1704	2076	1548	2164	4866	1183	4748	1249	2422	3108	3553	3515	3711	3881	3690	3328	2435	1701	2627	2189	3862	2321	4208	2313	3951	2318	3396	2810
ENSMUSG00000009580	Odam	725	6	23	0	0	0	29	0	15	0	12	0	21	0	0	0	11	0	28	165	0	0	0	0	89	0	13	0	15	0	0	0
ENSMUSG00000009585	Apobec3	1353	362	1206	657	590	222	739	327	820	239	1121	131	295	289	546	424	827	337	902	332	473	262	621	345	996	293	912	338	605	369	423	379
ENSMUSG00000009588	St6galnac1	97	7	127	2	10	0	5	5	10	0	5	41	54	0	47	2	3	0	0	2	17	6	27	0	5	2	3	2	50	2	17	2
ENSMUSG00000009596	Taf7l	0	44	3	32	0	2	0	0	0	21	0	0	0	6	0	9	0	30	0	24	0	6	0	6	3	42	0	38	0	10	0	11
ENSMUSG00000009614	Sardh	97	328	67	407	208	207	258	172	4	322	3	433	138	692	178	953	26	446	13	359	182	341	240	393	7	329	7	377	282	614	148	1004
ENSMUSG00000009621	Vav2	1566	405	1475	396	804	623	1124	517	469	332	413	393	1047	805	1387	1054	512	703	433	669	1138	713	1452	719	685	788	597	608	1606	761	1525	825
ENSMUSG00000009628	Tex15	75	48	73	35	406	1228	648	1054	57	11	14	11	21	190	22	153	47	21	40	41	23	174	8	148	26	21	32	12	47	70	47	120
ENSMUSG00000009630	Ppp2cb	1636	1168	1495	1105	1562	1833	1205	1519	1630	685	1498	866	1280	1264	1061	1092	1146	908	1053	1067	1622	1255	1190	941	1540	1210	1466	1032	1339	1254	1153	1120
ENSMUSG00000009633	G0s2	14	46	9	39	4	44	0	28	0	0	0	0	0	12	0	41	0	11	7	19	0	27	8	44	3	9	3	40	8	30	9	29
ENSMUSG00000009640	Dmap1	281	194	337	268	244	237	234	230	273	146	307	141	121	149	139	243	257	141	286	132	105	136	150	161	219	185	244	165	193	154	136	142
ENSMUSG00000009646	Pla2g12b	0	0	0	0	4	0	5	7	0	0	0	41	0	2	0	4	0	3	0	2	0	2	4	2	0	0	3	6	10	0	0	4
ENSMUSG00000009647	Mcu	1368	721	1371	714	732	643	672	658	631	664	673	796	956	904	936	848	650	851	577	840	1170	671	910	670	721	679	779	675	786	804	980	939
ENSMUSG00000009654	Oit3	3	6	7	2	20	2	10	4	2	0	0	0	9	6	4	13	3	7	4	4	15	6	8	8	3	2	5	6	5	4	5	11
ENSMUSG00000009670	Tex11	9	9	13	20	4	5	0	5	26	0	3	21	0	2	0	2	6	5	10	11	0	2	0	4	22	20	5	11	8	5	0	0
ENSMUSG00000009681	Bcr	2380	1593	2246	1345	2587	1695	2701	1748	1908	965	1939	957	1712	2462	1713	2820	2348	1221	1951	1249	1733	1706	1744	1333	2322	1169	2526	1265	1756	1245	1436	2426
ENSMUSG00000009687	Fxyd5	60	352	15	214	169	179	310	156	53	1764	34	1531	129	459	47	523	39	910	37	877	15	244	57	283	24	1010	66	908	188	892	136	574
ENSMUSG00000009731	Kcnd1	25	100	15	134	30	52	24	78	11	83	20	101	9	159	22	189	3	218	22	241	12	179	19	242	17	238	9	228	43	288	5	194
ENSMUSG00000009733	Tfcp2	292	247	383	444	149	368	253	416	142	177	134	242	113	291	206	410	208	385	148	305	111	287	131	400	181	433	179	341	254	465	174	341
ENSMUSG00000009734	Pou6f2	3	46	0	14	0	0	0	2	0	11	0	0	0	0	0	0	0	11	0	6	0	2	0	0	0	13	0	6	0	0	0	0
ENSMUSG00000009739	Pou6f1	400	973	399	1026	580	1179	567	1072	48	633	36	564	229	779	224	770	62	914	53	743	156	852	255	854	53	1067	51	1048	338	1392	207	929
ENSMUSG00000009741	Ubp1	2295	1798	1785	1462	2781	2025	2782	2169	1599	1038	1569	745	2327	1810	2291	1788	1557	1712	1378	1648	2477	2343	2529	1838	1695	1891	1812	1707	2119	1882	2429	1905
ENSMUSG00000009772	Nuak2	314	63	295	63	238	131	305	146	264	177	209	41	154	86	316	67	170	36	185	27	136	155	244	114	202	76	219	69	472	70	343	118
ENSMUSG00000009828	Ick	1366	1335	1178	1353	327	706	315	821	731	810	761	574	1471	647	993	837	856	920	902	879	1716	1078	760	1245	886	788	853	890	486	997	718	876
ENSMUSG00000009863	Sdhb	870	400	1162	700	475	456	529	368	1668	1328	1788	786	852	916	958	1198	1523	841	1681	862	875	467	764	641	1551	1044	1502	848	975	1107	1022	965
ENSMUSG00000009876	Cox4i2	11	9	5	16	20	55	29	54	0	11	0	0	13	88	15	74	0	0	7	4	34	99	19	82	0	10	3	16	19	65	0	82
ENSMUSG00000009894	Snap47	582	412	760	768	307	396	243	340	849	322	1045	413	183	668	263	916	807	880	905	817	227	455	289	641	922	750	796	637	532	721	343	724
ENSMUSG00000009900	Wnt3a	77	2	109	61	0	0	5	0	317	146	338	11	0	0	0	0	422	0	418	4	0	0	0	0	305	26	303	40	0	0	0	0
ENSMUSG00000009905	Kdsr	1261	938	1377	878	972	801	1005	824	1083	799	1085	1057	1080	1072	1192	890	1033	1106	1197	1200	1404	1250	1284	1015	1180	1200	1155	1181	1416	827	1234	995
ENSMUSG00000009907	Vps4b	2490	1530	2200	1442	1832	1669	1805	1392	2887	810	2800	715	3066	1556	2624	1377	2039	1211	2028	1315	3482	1747	2776	1328	2222	1470	2274	1392	2648	1389	2796	1589
ENSMUSG00000009927	Rps25	7903	4188	8746	5924	5924	4706	5863	4378	7969	8694	8541	6392	3020	3854	2847	4038	8243	3739	8736	4595	3250	3317	2761	3563	6941	4115	7348	4356	2888	3127	2547	3517
ENSMUSG00000009941	Nxf2	0	0	0	0	0	5	0	4	0	0	0	0	0	0	0	2	0	5	0	2	0	2	0	6	0	2	0	2	0	5	0	6
ENSMUSG00000009995	Taz	854	372	836	502	452	348	410	397	446	312	497	232	540	340	607	466	509	460	602	445	470	283	513	336	462	401	481	396	687	438	651	384
ENSMUSG00000010021	Kif19a	64	19	29	14	70	14	43	17	0	21	0	11	54	6	36	11	3	17	4	16	68	4	102	12	0	9	0	14	90	13	98	13
ENSMUSG00000010025	Aldh3a2	1175	1188	1280	1650	847	1180	886	1086	395	810	373	1057	254	1080	337	1259	437	1474	326	1396	561	964	532	1018	344	1475	343	1452	786	1213	440	1017
ENSMUSG00000010044	Zmynd10	7	22	0	8	20	30	39	46	2	0	0	0	13	6	11	13	11	9	0	2	9	23	4	12	5	4	3	7	19	15	17	15
ENSMUSG00000010045	Tmem115	453	444	589	597	340	699	281	528	540	519	639	514	491	459	561	568	545	602	684	473	510	580	528	476	498	539	521	531	605	543	621	512
ENSMUSG00000010047	Hyal2	310	221	367	214	198	153	377	271	787	208	910	61	279	227	320	426	802	153	798	170	298	273	386	223	579	184	676	178	528	306	321	254
ENSMUSG00000010048	Ifrd2	516	214	644	233	300	257	386	314	1494	395	1560	232	246	264	376	291	1467	278	1467	283	332	287	330	312	1373	399	1407	353	357	151	275	241
ENSMUSG00000010051	Hyal1	762	399	615	592	620	280	734	287	833	239	919	514	827	654	1050	765	1171	458	921	386	734	329	865	430	812	431	700	442	1582	567	1263	664
ENSMUSG00000010054	Tusc2	281	352	327	307	241	333	358	436	177	146	242	111	154	145	206	159	93	207	157	268	258	244	251	223	117	250	145	226	338	217	262	167
ENSMUSG00000010057	Nprl2	194	147	261	198	109	126	186	164	202	177	205	162	142	116	153	240	193	191	255	199	165	137	169	181	155	137	189	180	237	172	195	174
ENSMUSG00000010064	Slc38a3	38	2	57	6	4	4	20	9	33	0	20	0	5	2	0	2	65	0	71	0	12	2	0	0	30	0	47	2	8	5	5	2
ENSMUSG00000010066	Cacna2d2	53	31	5	12	17	22	10	22	2	11	5	31	9	14	4	23	3	5	7	6	6	13	4	12	5	5	0	2	10	8	5	17
ENSMUSG00000010067	Rassf1	962	1871	814	898	2405	4432	2391	3805	678	945	591	957	1521	986	1390	918	755	1014	724	1402	1928	1885	1837	1149	954	1731	941	1643	1547	1489	1457	1395
ENSMUSG00000010080	Epn3	1166	26	1393	101	541	15	681	23	1329	260	1538	162	1471	79	958	95	1287	13	1332	22	1025	25	910	10	1665	81	1445	81	678	24	942	55
ENSMUSG00000010086	Rnf112	18	27	0	26	0	2	0	0	0	0	0	0	0	8	0	11	0	0	0	2	0	2	0	19	0	0	0	2	0	0	0	13
ENSMUSG00000010095	Slc3a2	3783	2430	4283	1570	3387	5747	3272	3969	4453	2594	4020	2628	1022	2847	1163	2259	3213	2312	4963	2828	1597	3947	1478	2587	4512	2568	4602	2895	1859	3069	892	3128
ENSMUSG00000010097	Nxf1	3144	3719	2755	2107	3885	4689	4905	4830	2484	1951	2325	1792	3581	3450	4577	3492	2681	3317	2325	3265	3400	4483	3543	3901	2358	3314	2646	3086	3466	3486	4295	3306
ENSMUSG00000010110	Stx5a	1094	1622	1313	1423	1918	2341	2248	2161	823	1121	775	1188	1093	1295	1270	1495	761	1478	786	1300	1668	1933	1444	1690	879	1573	903	1467	1233	1332	1204	1225
ENSMUSG00000010122	Slc47a1	145	4	193	28	0	2	20	2	39	0	54	21	0	2	0	2	88	0	93	2	0	6	0	6	28	0	34	4	0	0	0	4
ENSMUSG00000010136	Pifo	5	4	0	0	7	0	0	0	0	0	3	0	9	2	15	2	0	3	0	2	0	0	0	0	3	2	0	0	10	0	0	0
ENSMUSG00000010142	Tnfrsf13b	16	9	13	8	27	7	20	13	6	0	9	0	9	4	0	13	3	9	10	2	0	13	12	12	7	17	17	6	12	11	5	2
ENSMUSG00000010154	Spire2	62	19	75	4	99	0	105	2	40	0	40	11	121	129	71	199	36	3	28	4	74	4	64	2	28	0	42	2	57	16	93	89
ENSMUSG00000010175	Prox1	40	98	0	16	106	77	77	57	6	83	0	41	0	63	15	46	11	30	4	44	51	111	38	63	7	12	7	21	92	52	5	62
ENSMUSG00000010205	Raver1	1577	1246	1541	1173	1341	1508	1515	1381	2052	1370	1840	745	1122	1367	1185	1382	2173	1252	2197	1116	1362	1292	1396	1239	2127	1374	2045	1356	1395	1466	1158	1299
ENSMUSG00000010277	2610507B11Rik	7930	4357	8019	4822	6593	4601	7044	4276	8016	3476	8224	3151	9002	5067	10150	6385	6197	4772	5767	4453	10414	4374	10011	4519	7073	4570	7579	4503	9283	5383	8831	5476
ENSMUSG00000010290	AI597479	521	269	583	485	248	234	296	264	562	135	557	172	129	260	160	354	455	375	479	337	168	248	195	355	488	306	416	314	272	344	157	277
ENSMUSG00000010307	Tmem86a	33	190	53	274	89	82	96	117	177	519	107	413	142	785	281	639	165	926	56	566	241	948	199	1441	92	365	103	380	382	917	254	588
ENSMUSG00000010311	Optc	7	12	11	4	30	34	15	111	13	0	25	11	9	73	36	39	36	7	28	9	17	97	15	50	13	12	30	4	94	52	17	29
ENSMUSG00000010342	Tex14	9	31	11	14	60	72	43	164	2	0	9	0	38	30	36	73	0	5	4	12	26	48	30	57	9	12	9	9	31	27	64	62
ENSMUSG00000010358	Ifi35	444	360	541	405	257	426	177	429	382	322	340	252	441	436	291	486	368	473	365	472	567	595	498	476	346	473	338	521	378	349	262	337
ENSMUSG00000010362	Rdm1	134	118	179	181	116	144	77	145	50	11	52	101	88	81	54	131	85	113	129	140	60	86	49	85	56	118	78	98	68	77	81	87
ENSMUSG00000010376	Nedd8	767	432	794	621	528	391	515	326	1666	830	1711	625	732	832	940	864	1225	569	1319	664	821	450	820	513	1341	689	1453	665	882	688	765	657
ENSMUSG00000010392	Gosr1	942	684	1052	952	640	995	562	787	860	395	921	484	445	524	635	672	956	680	724	652	660	520	509	653	882	821	905	791	858	768	452	616
ENSMUSG00000010406	Mrpl52	635	192	639	342	432	226	562	232	976	1930	970	856	341	375	369	350	802	235	838	275	340	223	375	289	805	298	781	353	429	305	431	344
ENSMUSG00000010435	Spaca7	0	4	0	0	17	0	15	2	0	0	0	0	0	0	0	0	0	0	0	0	0	4	0	2	0	0	0	0	8	0	0	0
ENSMUSG00000010453	Kansl3	1463	1577	1337	1570	2247	2908	2267	3108	709	789	717	1017	1396	1219	1216	1187	902	1346	844	1300	1637	1857	1284	1463	918	1370	998	1399	1334	1326	1386	1175
ENSMUSG00000010461	Eya4	9	162	5	287	0	0	0	0	0	63	0	41	0	2	0	11	0	205	0	315	0	2	0	2	0	108	0	161	3	5	0	8
ENSMUSG00000010476	Ebf3	0	264	11	86	73	42	24	67	2	83	0	383	5	59	4	76	6	268	7	524	15	95	12	76	0	110	3	88	45	107	5	87
ENSMUSG00000010492	Uckl1os	319	205	279	196	211	183	243	213	140	177	138	151	129	215	213	248	226	258	194	251	187	262	232	263	212	292	198	264	275	259	258	236
ENSMUSG00000010505	Myt1	47	17	0	0	7	0	0	0	0	0	0	11	0	2	0	0	0	0	0	6	3	0	8	0	3	0	0	2	3	0	0	0
ENSMUSG00000010517	Faf1	1640	804	1813	1051	1331	1028	1429	1044	2053	955	2061	776	1218	1279	1461	1433	2039	1012	1905	1022	1345	938	1276	983	2051	1227	2022	1282	1395	887	1411	1156
ENSMUSG00000010529	Gm266	123	14	181	4	93	2	124	2	2	11	0	11	25	0	4	0	0	3	0	6	6	2	15	8	3	2	0	0	0	7	0	10
ENSMUSG00000010538	Tsacc	69	24	101	14	53	24	53	26	39	11	38	91	9	22	25	34	34	38	34	41	17	20	57	38	37	33	36	35	24	19	17	24
ENSMUSG00000010554	Mettl16	916	558	890	690	663	1045	539	1086	1232	281	1183	222	295	629	412	735	1236	625	1206	524	431	474	434	443	1144	657	1023	581	455	465	330	614
ENSMUSG00000010592	Dazl	0	0	0	0	0	2	0	0	0	0	0	0	0	0	0	0	3	0	0	0	0	0	0	2	0	0	0	0	0	0	0	0
ENSMUSG00000010601	Apol7a	123	2	191	4	7	0	24	4	159	0	131	0	495	231	511	245	147	3	142	6	434	16	629	16	113	7	152	14	668	19	592	203
ENSMUSG00000010607	Pigyl	152	31	247	68	86	25	53	22	182	104	187	41	237	123	206	227	88	59	227	58	134	30	232	63	136	44	156	38	249	60	250	124
ENSMUSG00000010608	Rbm25	7796	4680	5974	4417	8134	6741	7715	6906	6692	1961	5992	2185	4794	5211	4974	4299	5755	4324	5113	3849	4682	5053	4841	4289	5624	4964	5507	4775	5090	3386	4908	4460
ENSMUSG00000010609	Psen2	292	335	439	386	231	255	272	300	95	550	91	494	146	485	213	628	111	540	99	601	207	497	176	638	136	610	105	584	315	642	267	536
ENSMUSG00000010651	Acaa1b	9	34	23	45	20	17	39	17	11	0	9	0	0	24	4	27	13	23	16	14	3	2	15	14	11	10	13	6	10	11	17	28
ENSMUSG00000010660	Plcd1	674	859	906	977	429	926	391	866	2657	1017	2791	665	150	1090	135	1395	2990	1058	3203	966	122	990	139	871	2548	1134	2453	1092	310	1182	106	1265
ENSMUSG00000010663	Fads1	1168	1420	1156	1983	580	1646	605	1350	656	913	606	705	13	1383	82	1736	853	1112	890	1242	43	1354	57	1963	674	903	767	925	427	1623	22	1408
ENSMUSG00000010721	Lmbr1	490	642	499	938	340	578	462	648	309	457	360	423	175	514	224	538	291	872	384	938	213	492	191	447	358	742	359	673	315	567	212	529
ENSMUSG00000010751	Tnfrsf22	231	130	191	163	103	140	124	132	398	104	338	151	79	90	61	87	386	134	307	125	68	81	64	153	342	83	303	100	78	156	72	136
ENSMUSG00000010755	Cars	650	572	607	491	1397	1187	1934	1208	1356	550	1374	464	794	641	819	551	1138	621	1145	756	895	846	853	566	1216	639	1218	591	718	383	642	540
ENSMUSG00000010760	Phlda2	115	12	121	6	47	14	67	18	189	21	134	21	25	18	18	18	119	5	99	9	34	25	23	17	197	9	160	21	10	13	30	37
ENSMUSG00000010796	Asz1	0	0	0	0	0	0	0	0	0	0	0	0	5	0	0	0	0	0	0	0	0	0	19	0	0	2	3	0	0	0	5	0
ENSMUSG00000010797	Wnt2	0	110	0	64	7	50	10	52	0	21	0	81	0	18	0	20	0	7	0	51	3	6	0	14	0	17	0	4	5	15	5	6
ENSMUSG00000010803	Gabra1	0	14	0	4	0	0	0	4	0	0	0	11	0	20	0	2	0	0	0	0	0	20	0	40	0	0	0	6	3	13	0	2
ENSMUSG00000010825	Grid2ip	7	21	9	0	4	14	10	12	17	0	25	0	5	10	4	4	18	5	25	16	0	13	4	21	32	12	45	6	5	10	0	15
ENSMUSG00000010830	Kdelr3	132	511	137	630	159	348	96	311	133	530	118	826	96	631	107	545	124	759	99	717	111	864	102	1659	98	747	105	702	158	951	51	505
ENSMUSG00000010841	1700006E09Rik	3	14	3	4	4	2	10	9	0	11	0	0	9	8	4	13	3	5	4	7	6	9	0	14	0	12	3	9	10	7	5	8
ENSMUSG00000010911	Apip	152	88	219	125	93	60	91	120	433	63	504	71	17	151	32	187	321	99	372	137	32	94	53	117	346	150	393	148	54	107	39	163
ENSMUSG00000010914	Pdhx	323	179	325	264	215	275	162	209	546	135	613	141	129	237	149	252	401	189	445	152	159	192	184	181	477	205	506	172	195	173	153	185
ENSMUSG00000010936	Vac14	710	456	724	442	528	434	529	413	705	685	659	383	528	557	500	693	745	517	761	436	473	487	644	511	666	525	637	615	624	617	495	516
ENSMUSG00000011008	Mcoln2	0	76	0	12	80	161	29	156	2	0	3	21	21	20	29	11	3	17	7	56	9	106	30	53	3	2	5	14	68	7	39	13
ENSMUSG00000011034	Slc5a1	134	19	133	8	60	2	58	0	144	11	85	41	1292	10	990	36	54	5	86	19	1229	9	722	4	85	9	116	16	516	22	638	10
ENSMUSG00000011052	1700049J03Rik	5	7	0	10	0	7	5	9	0	0	0	0	0	0	0	6	3	0	4	2	3	11	8	8	0	2	0	0	0	2	5	4
ENSMUSG00000011096	Akt1s1	552	451	644	553	376	338	439	410	840	696	932	484	491	539	635	586	779	379	801	421	620	555	715	647	843	533	800	487	755	719	672	578
ENSMUSG00000011114	Tbrg1	1021	792	1345	1429	900	1055	777	740	1321	1546	1187	1490	1010	1666	1153	1943	1259	1177	1224	1236	1504	901	1299	1115	1125	1430	1254	1320	1142	1141	963	1469
ENSMUSG00000011118	Panx3	3	4	3	4	0	0	0	4	2	0	0	0	0	0	0	0	0	0	0	0	3	0	0	2	0	0	0	2	0	0	9	0
ENSMUSG00000011148	Adssl1	77	81	107	63	80	105	129	133	300	73	433	81	79	49	89	30	175	23	200	53	40	81	45	76	394	50	332	35	29	44	51	37
ENSMUSG00000011154	Cfap161	0	2	0	0	0	4	0	2	2	0	0	0	9	22	4	36	0	0	0	2	6	15	4	38	0	0	0	0	10	5	9	17
ENSMUSG00000011158	Brf1	1100	758	1108	987	1170	998	1348	886	549	291	564	665	777	645	968	846	768	960	734	941	660	974	1003	979	613	835	626	724	877	859	980	730
ENSMUSG00000011171	Vipr2	9	145	9	185	17	269	10	225	4	0	7	21	0	131	0	155	0	32	0	59	12	127	8	185	0	29	0	60	17	198	0	194
ENSMUSG00000011179	Odc1	3458	3148	3472	1768	2537	3046	1958	2944	5674	1764	8650	2265	1874	1804	2014	1618	7455	1217	7156	1959	2893	1487	2080	1139	6782	2486	6840	2530	2161	1075	2454	1790
ENSMUSG00000011254	Thg1l	227	100	237	105	188	115	110	65	407	63	384	131	108	166	135	152	291	120	307	86	136	127	120	153	269	86	326	101	174	131	89	151
ENSMUSG00000011256	Adam19	36	621	11	427	185	479	43	632	6	187	5	292	17	1010	36	973	13	209	10	428	46	1704	42	1499	7	356	5	321	291	1861	5	1339
ENSMUSG00000011257	Pabpc4	1522	1141	1655	845	2073	1358	2534	1415	2393	2127	2174	1802	1562	1908	1567	1676	2550	1572	2098	1374	1770	1889	1650	1499	2233	1432	2161	1554	1580	1411	1656	1927
ENSMUSG00000011263	Exoc3l2	14	7	21	26	10	4	15	2	64	21	80	11	0	0	0	2	124	7	102	2	0	0	0	6	115	5	97	4	22	8	5	2
ENSMUSG00000011267	Zfp296	202	22	309	53	73	27	115	49	224	32	189	41	63	30	86	30	286	30	310	9	97	44	116	23	267	36	313	66	43	21	55	48
ENSMUSG00000011305	Plin5	14	21	5	2	43	17	53	62	4	0	0	0	30	2	15	6	3	7	4	12	17	8	34	16	3	4	7	2	26	5	13	10
ENSMUSG00000011306	Sugp1	718	424	650	621	383	350	481	429	591	405	544	282	354	368	454	429	632	464	605	399	306	367	345	476	450	472	584	461	401	435	326	400
ENSMUSG00000011349	Dmrtc2	0	0	0	2	0	0	0	0	0	0	0	0	0	0	0	0	0	0	0	0	0	0	0	2	0	0	0	0	0	2	0	0
ENSMUSG00000011350	Gm5893	0	0	0	0	0	7	0	10	2	0	0	0	0	0	0	0	0	0	0	0	0	6	0	4	0	0	0	0	0	0	0	0
ENSMUSG00000011382	Dhdh	84	379	97	460	96	245	53	353	39	115	18	282	13	327	47	370	24	360	40	376	17	243	19	340	45	324	30	297	78	283	26	386
ENSMUSG00000011427	Zfp790	424	303	389	489	205	232	281	316	284	83	236	232	154	213	174	298	262	312	215	295	119	283	176	283	208	349	215	319	230	264	182	196
ENSMUSG00000011463	Cpb1	3	0	5	24	7	19	0	9	0	0	14	0	0	0	0	4	31	9	37	4	3	6	0	2	30	2	15	11	3	2	0	0
ENSMUSG00000011486	Slc25a41	0	4	3	0	4	4	0	5	0	0	0	0	9	0	0	2	0	0	0	2	0	2	4	0	0	0	0	0	3	0	5	0
ENSMUSG00000011589	Fsd1	36	21	9	18	20	30	15	33	6	11	3	51	9	32	32	25	6	19	10	29	40	48	49	66	0	25	9	21	24	60	22	22
ENSMUSG00000011632	Pinlyp	36	0	29	2	20	0	10	0	60	11	89	0	9	0	4	2	52	5	96	4	0	2	0	0	56	20	76	4	0	0	0	0
ENSMUSG00000011658	Fuz	453	326	463	431	307	328	301	352	378	540	415	323	258	479	320	693	506	406	433	421	286	411	311	494	441	456	462	451	507	631	385	614
ENSMUSG00000011751	Sptbn4	40	22	9	2	17	50	5	65	2	21	7	0	25	41	22	32	6	17	10	14	40	57	42	74	0	15	11	6	17	99	17	73
ENSMUSG00000011752	Pgam1	407	345	509	504	109	315	167	256	2117	426	2201	363	624	615	717	554	1664	540	2068	509	708	397	524	361	1564	484	1657	509	617	520	541	574
ENSMUSG00000011831	Evi5	1265	1657	1114	2578	1298	1785	929	1721	1737	1090	1511	896	507	1875	607	1716	1305	2159	1310	1991	586	1927	599	1972	1614	1985	1558	2148	973	1902	507	1800
ENSMUSG00000011832	Evi5l	521	607	465	586	337	522	329	541	400	571	402	494	229	502	266	734	419	699	442	606	250	553	285	624	386	674	380	728	382	788	275	726
ENSMUSG00000011837	Snapc2	277	211	363	322	304	201	248	238	347	561	389	292	333	293	401	280	360	251	375	228	405	218	419	232	348	288	389	298	504	339	343	254
ENSMUSG00000011877	Git1	1640	1770	1731	1754	1440	1397	1286	1141	1369	1474	1425	1319	2468	1180	1961	1718	1477	1666	1703	1603	2056	1341	1815	1346	1521	1599	1514	1556	1896	1863	2268	1761
ENSMUSG00000011884	Gltp	1498	353	1966	772	593	255	586	175	6079	1183	5930	816	1234	299	1482	319	3439	335	4209	406	1005	171	801	261	5569	698	5356	692	2053	336	1685	319
ENSMUSG00000011958	Bnip2	1283	1056	1248	1510	890	1156	843	962	2175	696	1875	937	761	1636	681	1586	1798	1453	1595	1337	787	1141	678	1152	1917	1424	1940	1315	839	1464	621	1202
ENSMUSG00000011960	Ccnt1	1596	1545	1747	1706	2402	3377	1967	2868	1390	1017	1407	1128	1633	1551	1564	1414	1477	1568	1295	1594	1835	1994	1362	1405	1377	1486	1418	1436	1439	1307	1453	1370
ENSMUSG00000012017	Scarf2	143	2627	135	3537	225	1154	86	1230	20	4430	12	3946	42	4368	54	4532	16	3702	31	3168	111	4433	94	5897	39	4951	28	5376	889	9839	47	5225
ENSMUSG00000012042	4930579F01Rik	0	7	0	0	0	0	15	7	0	0	3	0	0	2	0	0	0	0	0	2	6	4	0	0	3	0	5	0	0	0	0	2
ENSMUSG00000012076	Brms1l	374	370	371	619	254	335	272	353	360	281	329	443	183	475	192	512	373	738	329	613	176	464	158	485	325	637	286	562	293	535	174	485
ENSMUSG00000012114	Med15	1568	1234	1645	1446	1302	1200	1643	1104	1601	1245	1538	1229	1683	1400	1631	1435	1664	1480	1666	1327	1506	1131	1706	1150	1523	1673	1520	1705	1578	1460	1508	1410
ENSMUSG00000012117	Dhdds	589	432	724	657	396	490	443	488	551	436	489	373	349	549	440	695	622	481	724	462	357	473	423	566	536	504	572	557	495	545	326	512
ENSMUSG00000012123	Aim1l	1379	31	1337	90	705	10	615	4	740	115	582	41	549	36	227	66	648	7	856	6	187	4	345	4	759	74	752	57	118	7	254	40
ENSMUSG00000012126	Ubxn11	238	110	239	138	257	98	239	117	671	177	679	192	266	163	174	168	527	122	589	112	187	125	236	131	661	148	601	127	207	159	199	163
ENSMUSG00000012187	Mogat1	0	0	0	0	47	0	34	0	0	0	3	0	590	8	624	22	6	0	0	0	340	0	401	0	3	0	5	2	19	5	39	2
ENSMUSG00000012211	Tex22	0	7	0	4	10	2	5	5	2	0	0	0	0	0	0	0	0	3	0	0	3	9	0	0	0	0	0	2	0	2	0	0
ENSMUSG00000012282	Wnt8a	0	2	0	2	0	0	5	4	0	0	0	0	0	0	0	0	0	0	0	2	0	0	0	0	0	2	0	6	0	0	0	0
ENSMUSG00000012296	Tjap1	486	405	509	373	544	517	672	480	600	447	653	353	374	412	288	577	581	385	516	438	354	480	431	502	848	538	739	528	371	528	254	572
ENSMUSG00000012350	Ehf	15914	281	15601	1543	3357	57	3710	36	15125	540	16920	453	4071	22	4779	88	10691	63	10775	91	5744	62	3741	17	14681	388	13052	548	5034	135	4316	22
ENSMUSG00000012396	Nanog	5	6	0	2	10	0	5	2	0	0	0	0	0	10	0	4	0	0	0	0	0	15	4	6	0	0	0	0	5	0	0	8
ENSMUSG00000012405	Rpl15	4125	2309	5864	3310	2913	3067	3191	2808	6207	4659	6809	3433	2713	3614	2592	3583	6382	2431	7092	2858	2421	2738	2174	2745	6183	2975	6431	3191	2665	3041	2125	3168
ENSMUSG00000012422	Tmem167	587	649	646	940	442	735	420	593	1766	654	1567	725	445	881	479	950	1038	905	1095	850	499	645	468	883	1142	964	1161	798	544	994	469	748
ENSMUSG00000012428	Steap4	1542	3405	1331	4281	1410	1068	824	923	20	1048	5	1541	1475	1660	2096	2676	24	2805	40	3548	2228	1536	1463	1071	45	1494	55	2128	1760	835	845	1652
ENSMUSG00000012429	Mplkip	413	226	407	221	251	302	291	392	357	229	316	121	200	256	213	275	250	172	267	186	224	229	266	215	272	190	292	221	230	214	199	212
ENSMUSG00000012443	Kif11	281	152	245	101	267	169	324	120	1746	156	1649	91	59	106	61	150	2055	51	1887	91	125	90	169	61	1445	179	1541	233	134	21	64	147
ENSMUSG00000012483	Rpa3	240	74	205	134	103	63	105	59	308	166	393	141	175	139	192	153	273	72	246	120	179	71	146	102	240	87	294	95	155	107	140	102
ENSMUSG00000012519	Mlkl	75	189	123	173	86	55	77	54	784	125	730	101	449	188	256	268	419	147	411	137	516	148	397	168	494	168	483	190	134	137	250	230
ENSMUSG00000012520	Phox2b	123	58	0	0	0	0	5	0	0	0	0	0	0	0	4	2	0	0	0	2	0	0	0	0	0	0	0	0	0	0	0	0
ENSMUSG00000012535	Tnpo3	2165	1489	2230	1733	1878	1804	1772	1833	2982	1038	2800	927	1022	1834	1337	2143	2612	1560	2614	1414	1441	1559	1444	1469	2409	1536	2715	1498	1723	1339	1196	1755
ENSMUSG00000012609	Ttll5	833	632	728	686	1183	800	1329	858	764	467	757	313	333	619	426	459	645	515	648	473	380	588	520	460	526	512	588	658	598	361	478	498
ENSMUSG00000012640	Zfp715	593	368	591	593	439	515	362	514	338	208	347	272	437	475	380	572	314	581	292	512	544	515	393	530	293	493	345	411	493	435	575	389
ENSMUSG00000012705	Retn	0	0	0	2	4	0	5	0	0	0	0	0	0	0	0	2	0	0	0	0	0	2	0	0	0	0	3	0	0	0	0	2
ENSMUSG00000012777	Acpt	123	157	105	55	198	239	181	436	82	229	114	131	150	131	153	168	96	153	123	154	162	164	188	106	106	168	126	149	190	110	199	111
ENSMUSG00000012819	Cdh23	18	43	23	26	33	24	29	36	0	52	0	11	21	192	8	342	3	32	13	68	20	57	12	59	7	116	19	107	38	24	5	254
ENSMUSG00000012848	Rps5	11027	6300	14705	8885	8500	10988	7958	9428	10107	12906	11693	10308	5554	6335	4673	6136	12470	5946	15465	7269	5554	6020	4819	5810	10898	7117	11320	7117	4357	6453	3645	5399
ENSMUSG00000012889	Podnl1	16	12	5	4	24	12	29	26	11	0	3	21	21	6	0	6	6	3	0	7	9	4	12	8	3	4	7	4	10	8	5	6
ENSMUSG00000013033	Adgrl1	532	1288	295	1301	554	2519	358	2318	189	1131	225	1359	75	2659	146	2472	509	2107	461	1535	122	3108	135	4308	358	1789	362	1945	797	3240	72	2605
ENSMUSG00000013076	Amotl1	4973	6653	5369	8715	2603	5232	2905	4831	4368	2895	4082	3061	2057	5965	1156	5830	4322	8350	3844	6750	1761	9159	1411	11805	3663	5500	3907	5999	1606	7117	984	5905
ENSMUSG00000013083	2200002J24Rik	0	0	0	0	0	0	0	0	0	0	0	0	0	0	0	0	0	0	0	0	0	0	0	0	0	0	0	0	3	0	0	0
ENSMUSG00000013089	Etv5	455	404	495	396	788	590	1101	696	255	498	211	413	192	446	171	340	152	414	151	423	179	509	210	394	263	394	244	406	265	539	110	427
ENSMUSG00000013091	Tmem190	58	24	31	8	14	10	34	15	53	11	43	21	9	20	22	11	47	9	53	12	20	6	27	8	45	9	55	16	22	4	30	11
ENSMUSG00000013150	Gfod2	130	86	135	99	86	47	143	78	97	52	123	61	104	90	107	111	108	61	86	54	71	85	113	70	142	58	101	57	85	74	123	75
ENSMUSG00000013155	Enkd1	62	85	67	66	96	60	139	80	82	32	131	31	30	63	57	99	96	59	99	41	68	46	72	72	92	37	91	36	73	43	77	55
ENSMUSG00000013158	4933405L10Rik	9	27	9	18	4	12	15	9	20	11	16	0	0	16	18	25	34	5	16	7	9	6	12	12	7	5	17	11	22	8	17	6
ENSMUSG00000013160	Atp6v0d1	898	913	1104	1316	432	917	348	730	1036	1588	1112	1369	615	1367	798	1481	943	1626	1172	1508	785	1276	648	1542	960	1679	1035	1604	1043	1841	613	1229
ENSMUSG00000013236	Ptprs	6839	4981	6447	5469	4237	5735	3786	5113	12214	9472	13018	8768	17446	15406	20169	17220	16260	8208	15226	6925	17335	7099	20927	10169	14060	10243	14054	9769	18028	25824	22112	21430
ENSMUSG00000013275	Slc41a1	672	1247	633	733	1325	2498	1105	2253	464	1256	497	1430	237	1478	316	934	501	1723	537	1433	434	1855	393	1397	570	1628	540	1705	582	1663	245	1279
ENSMUSG00000013338	Fer1l4	826	7	976	8	30	4	86	5	55	42	36	0	2497	22	3173	36	72	9	28	12	2633	23	3984	6	189	5	103	14	2306	33	3531	4
ENSMUSG00000013353	4931406B18Rik	3	4	0	0	0	0	0	0	0	0	0	0	0	0	4	0	0	0	0	0	0	0	0	0	0	0	0	0	0	0	5	0
ENSMUSG00000013367	Iglon5	7	242	9	252	27	154	15	127	2	260	5	192	5	231	11	201	0	115	4	149	9	150	0	332	5	123	0	190	54	419	0	227
ENSMUSG00000013415	Igf2bp1	3	2	5	0	4	0	10	2	8	0	7	0	13	12	8	8	3	0	4	0	0	0	4	2	11	2	11	0	3	0	0	13
ENSMUSG00000013418	B4galnt2	73	9	11	16	10	19	0	23	19	11	16	0	0	0	0	6	3	7	13	29	0	8	0	0	13	12	17	2	3	4	0	4
ENSMUSG00000013419	Zfp651	409	1160	361	1359	564	591	515	951	82	664	65	906	158	1125	149	1352	193	1365	142	1192	179	1099	210	1207	181	1044	139	966	436	1003	140	1236
ENSMUSG00000013465	Nelfb	951	636	1443	962	495	629	620	730	1087	260	1130	313	686	668	876	823	1261	613	1332	600	745	757	891	722	1121	652	1130	677	875	774	773	652
ENSMUSG00000013483	Card14	185	140	279	179	27	35	62	38	91	177	138	51	50	116	32	157	139	191	117	187	54	58	79	102	145	144	112	208	92	154	119	118
ENSMUSG00000013495	Tmem175	532	589	670	729	323	629	305	590	669	332	666	373	291	576	288	697	650	621	605	645	289	502	247	726	598	607	635	593	464	705	224	581
ENSMUSG00000013523	Bcas1	29	12	31	4	33	2	48	4	17	0	23	11	17	40	11	106	16	0	4	6	9	8	8	12	26	2	42	0	26	13	13	46
ENSMUSG00000013539	Tango2	137	170	187	250	57	82	62	86	106	239	116	222	34	106	32	171	147	170	142	181	37	67	38	93	115	171	89	146	68	131	34	151
ENSMUSG00000013562	4833413E03Rik	9	0	7	2	0	2	0	5	2	0	3	0	0	4	11	4	3	0	0	0	12	2	4	2	0	0	3	0	3	0	13	2
ENSMUSG00000013584	Aldh1a2	5	86	23	97	162	1907	34	1163	2	644	12	786	30	10806	11	5589	0	696	4	463	173	9707	173	18732	3	444	0	1002	1156	12319	60	6759
ENSMUSG00000013593	Ndufs2	1397	1351	1869	1601	1035	1685	943	2137	2115	1650	2345	1651	1301	2451	1341	2469	2312	1248	2436	1377	1441	2847	1186	2362	1888	1486	2020	1476	1512	2914	1069	2271
ENSMUSG00000013611	Snx31	194	12	359	2	27	5	58	2	13	0	5	0	5	6	4	4	11	5	19	6	0	6	4	6	17	0	19	11	17	0	13	2
ENSMUSG00000013622	Atraid	536	913	830	1303	304	598	372	594	591	996	657	836	312	668	444	802	617	974	675	1221	422	739	352	807	615	1026	525	950	570	920	414	702
ENSMUSG00000013629	Cad	1528	1081	1817	1355	811	1257	867	957	4421	1287	3994	1289	457	1287	525	1532	4879	1555	4540	1141	572	813	603	1192	3764	1337	4130	1491	774	1380	499	1408
ENSMUSG00000013643	Lypd8	0	2	3	0	33	0	0	0	2	0	9	0	67	34	181	30	29	0	7	0	74	8	64	0	9	0	660	2	467	5	431	35
ENSMUSG00000013646	Sh3bp5l	415	202	485	280	346	285	472	266	420	177	431	141	250	231	270	350	363	224	381	165	213	216	244	281	378	166	425	184	275	139	245	241
ENSMUSG00000013653	1810065E05Rik	0	0	0	0	4	0	5	0	0	0	0	0	17	0	18	0	0	0	0	0	12	0	12	0	0	0	0	0	15	0	9	0
ENSMUSG00000013662	Atad1	2110	1330	2188	1723	1124	1374	877	1218	2569	727	2487	685	744	1396	1078	1460	2037	1296	2138	1354	1107	1169	764	1149	2311	1444	2207	1400	1182	1378	748	1375
ENSMUSG00000013663	Pten	6018	6098	5331	8253	2616	4317	2343	5171	12162	3538	12153	3483	2086	5416	3195	4807	9833	6155	8987	5847	3004	6120	2552	6253	11391	6231	10949	6821	4078	4818	2682	4923
ENSMUSG00000013668	4933402N03Rik	0	0	0	0	0	0	0	0	0	0	0	0	0	0	0	0	0	0	0	0	0	0	0	0	0	0	0	0	0	0	0	0
ENSMUSG00000013698	Pea15a	868	1689	730	2202	1186	3656	881	2690	647	1308	677	1460	4561	1385	6240	1542	532	2115	574	2038	5755	1555	4635	1993	583	1544	622	1493	8413	1891	7374	1296
ENSMUSG00000013701	Timm23	462	279	557	272	514	396	543	293	1210	447	1214	232	491	436	468	433	812	308	869	315	434	411	427	302	939	312	1008	305	528	324	397	353
ENSMUSG00000013707	Tnfaip8l2	9	7	11	4	4	5	10	5	0	0	7	11	9	0	0	6	8	5	10	9	0	6	0	4	5	5	7	2	8	11	0	6
ENSMUSG00000013736	Trnt1	966	812	974	1121	689	1156	624	970	1258	270	1207	323	972	688	1248	737	1166	690	1040	743	1005	745	801	719	1047	777	1029	742	1125	696	904	607
ENSMUSG00000013766	Ly6g6e	99	0	143	6	24	2	24	0	75	21	65	0	84	6	78	0	36	0	59	4	49	18	72	31	81	7	108	0	52	8	81	4
ENSMUSG00000013787	Ehmt2	2569	1341	3274	1843	1898	1723	2124	1645	2346	1609	2536	1712	4163	2314	4836	2927	2869	1654	2706	1562	3581	2012	4329	2223	2671	1935	2606	1974	4216	2379	4473	2235
ENSMUSG00000013822	Elof1	328	115	425	283	267	148	272	133	562	353	682	232	266	194	242	264	555	184	568	149	227	153	270	178	515	174	574	213	289	167	212	178
ENSMUSG00000013833	Med16	762	617	928	803	705	947	691	774	640	696	653	615	378	539	461	607	794	682	893	677	479	553	562	732	691	648	670	649	514	856	364	699
ENSMUSG00000013846	St3gal1	1050	2491	912	1981	1542	1083	1201	921	108	3019	87	3554	3947	3212	2627	3812	183	4814	99	4760	3539	1473	2241	1211	153	4458	202	4644	1749	3231	2619	3826
ENSMUSG00000013858	Tmem259	1278	1093	1387	1148	1210	1227	1462	1027	1154	2169	1123	1380	1188	1326	1174	1421	1510	1206	1335	1367	940	1231	1239	1378	1375	1343	1483	1376	1252	1685	1094	1310
ENSMUSG00000013878	Rnf170	475	219	409	307	139	140	162	203	427	156	362	101	162	295	270	322	304	235	298	234	224	206	244	268	337	253	332	286	303	261	199	297
ENSMUSG00000013921	Clip3	347	3595	45	3979	554	3166	110	3179	4	1505	5	1853	17	1510	43	1438	3	2059	7	2114	114	2629	83	3107	15	2039	11	1933	500	2820	30	1880
ENSMUSG00000013928	Thap8	3	29	9	12	10	10	29	33	17	21	25	0	13	20	8	15	21	21	10	14	15	29	8	21	26	12	28	14	10	8	5	15
ENSMUSG00000013936	Myl2	0	0	0	0	4	0	0	0	0	0	0	0	0	0	0	0	0	0	0	0	0	0	4	0	0	0	0	0	0	0	0	0
ENSMUSG00000013973	Dedd	633	513	688	721	537	595	572	562	647	426	591	423	457	475	632	517	648	479	568	430	615	446	498	526	621	475	584	389	572	424	600	438
ENSMUSG00000013974	Mcemp1	3	2	0	4	14	0	0	0	0	0	0	0	0	6	0	20	0	3	0	0	0	4	0	2	0	7	0	0	0	4	5	19
ENSMUSG00000013997	Nit1	806	585	976	807	699	658	724	645	823	530	866	615	578	621	745	688	910	559	884	547	700	523	678	623	867	640	771	534	816	573	756	596
ENSMUSG00000014030	Pax5	11	2	3	0	7	0	5	0	0	0	0	11	0	0	0	2	0	0	0	0	0	4	0	0	0	0	3	0	0	2	9	4
ENSMUSG00000014039	Prdm15	668	439	676	421	429	469	405	455	531	166	493	222	358	284	539	419	614	389	546	287	368	376	487	425	430	367	574	351	420	347	376	250
ENSMUSG00000014074	Rnf168	692	348	752	692	346	379	334	353	1072	146	1019	141	216	336	288	431	884	377	832	354	190	250	315	312	951	462	748	408	317	306	296	332
ENSMUSG00000014075	Tctex1d2	80	74	97	150	50	62	39	68	42	63	29	81	17	123	32	136	47	107	47	135	17	67	15	97	45	123	40	101	50	66	51	120
ENSMUSG00000014077	Chp1	1531	1546	1843	1799	943	1849	729	1549	1563	1007	1604	1380	3519	1935	3432	1945	1662	1685	1479	1867	4459	1610	2728	1420	2015	1829	2007	1881	2904	1841	3201	1844
ENSMUSG00000014104	Sval2	0	0	0	0	0	0	0	0	0	0	0	0	0	2	0	0	0	0	0	0	0	0	0	0	0	0	0	0	0	0	0	0
ENSMUSG00000014158	Trpv4	861	43	706	74	561	29	510	31	527	125	684	61	848	168	862	220	622	59	608	73	762	50	752	34	623	42	658	48	1578	109	1250	196
ENSMUSG00000014164	Klhl3	22	6	31	14	254	29	429	30	4	0	9	21	34	26	61	27	11	0	4	6	74	13	94	12	0	0	7	0	94	8	68	35
ENSMUSG00000014177	Tvp23b	547	444	573	588	422	295	362	276	544	166	528	252	486	397	571	496	424	452	375	443	606	357	491	415	475	436	525	475	734	394	587	435
ENSMUSG00000014195	Dnajc7	2334	1162	2050	1243	1410	1286	1958	1341	2041	519	1877	494	823	824	1121	1104	1718	772	1577	741	1102	1043	1115	964	1756	832	1806	759	1085	826	1048	862
ENSMUSG00000014198	Zfp385c	25	58	19	90	14	15	0	15	20	42	36	51	30	6	22	16	34	17	28	11	20	11	19	25	60	26	26	21	17	30	13	33
ENSMUSG00000014226	Cacybp	1190	516	1278	938	570	696	377	560	3267	530	2951	484	491	1105	773	1110	2337	818	2052	825	669	615	577	749	2510	864	2299	908	781	659	621	825
ENSMUSG00000014232	Cluap1	576	232	563	481	310	328	386	378	357	135	355	172	121	282	178	319	375	266	353	248	145	206	206	208	344	226	406	238	261	181	169	297
ENSMUSG00000014243	Zswim7	42	54	37	49	66	75	91	88	90	32	105	71	30	88	29	74	67	44	93	54	32	65	42	76	53	41	63	71	57	95	64	96
ENSMUSG00000014245	Pigl	154	95	149	111	192	62	334	77	129	32	129	31	59	100	57	88	137	99	126	98	54	72	79	106	151	92	171	88	97	112	77	87
ENSMUSG00000014294	Ndufa2	459	254	646	392	248	274	310	217	896	924	965	534	395	508	390	556	779	345	783	337	380	244	356	347	778	382	752	483	429	432	457	458
ENSMUSG00000014301	Pam16	139	200	183	194	119	140	67	174	209	218	185	262	113	174	78	218	165	237	188	211	88	165	42	183	157	182	162	199	158	157	106	185
ENSMUSG00000014303	Glis2	301	1839	317	1812	432	1060	367	900	213	1007	251	876	150	1178	96	1279	273	1998	246	1902	134	1122	158	1354	257	1036	234	1149	312	1067	93	1352
ENSMUSG00000014313	Cox6c	1487	812	1831	1334	887	1331	734	1263	2713	1692	2813	1329	1126	2255	1181	2293	2453	1096	2126	1175	1288	1375	951	1969	2191	1248	2335	1262	1430	1460	997	1612
ENSMUSG00000014329	Bicc1	40	7320	63	6227	679	4045	334	3294	4	2822	3	3524	25	4828	75	5735	11	4964	10	5032	80	3314	64	3912	9	4509	15	4291	577	2942	81	4830
ENSMUSG00000014349	Ube2z	1686	1251	1881	1574	1114	1833	929	1313	2048	820	1997	1188	1359	1527	1216	1623	1837	1254	1795	1143	1639	1432	1317	1135	1975	1150	1961	1106	1144	1384	955	1545
ENSMUSG00000014351	Gip	0	2	0	0	0	0	5	0	0	0	0	0	0	0	0	0	0	0	0	0	0	0	0	0	0	0	0	0	0	0	0	2
ENSMUSG00000014353	Tmem87b	1438	1451	1240	1239	1891	2291	1586	2227	1098	727	1121	806	1421	1455	2156	1349	1030	1110	964	1178	2174	1898	1747	1507	1072	1409	1040	1323	2719	1729	2129	1278
ENSMUSG00000014355	Anapc1	4251	3514	4319	4277	3417	4285	3201	4299	6197	1847	5870	1963	1816	6509	2737	9291	5860	3884	5509	3521	2378	3868	3236	4513	4842	3790	5371	3863	3487	5157	2513	7385
ENSMUSG00000014361	Mertk	99	990	61	915	554	893	748	963	77	343	45	313	71	992	103	1178	47	479	62	393	91	957	98	1037	85	578	66	704	338	1403	93	1156
ENSMUSG00000014402	Tsg101	1160	649	1293	834	824	595	820	381	1565	747	1569	504	1367	729	1482	879	1231	709	1264	687	1492	532	1272	592	1396	800	1422	783	1491	830	1508	628
ENSMUSG00000014418	Hps5	806	652	800	787	554	580	548	606	573	353	566	443	578	709	802	901	637	747	694	650	671	818	794	913	600	809	681	704	935	860	799	802
ENSMUSG00000014426	Map3k4	1926	1175	2054	1155	1206	1675	1034	1721	1260	654	1332	363	491	801	699	855	1349	694	1132	707	541	1187	749	1086	1214	674	1176	678	816	838	664	881
ENSMUSG00000014444	Piezo1	3324	3766	2941	1812	7676	3802	8586	4281	1884	3632	1709	3795	8292	6685	6697	8031	2170	6452	1737	5448	8753	5746	8567	2866	2239	3699	2463	4144	4900	2599	5178	8501
ENSMUSG00000014453	Blk	0	0	5	0	0	0	0	2	0	0	0	0	0	4	0	22	0	0	0	0	3	0	0	0	0	0	0	2	5	0	0	4
ENSMUSG00000014470	Rnf166	325	308	353	431	264	439	362	331	277	291	273	323	192	387	227	387	311	425	283	369	204	269	217	449	348	327	276	331	244	459	220	341
ENSMUSG00000014496	Ankrd28	1252	2790	1160	2293	3199	1432	2791	1850	1049	2791	1008	2336	1330	5088	1270	2375	940	2665	822	2937	2268	6043	1512	2860	1123	3130	1130	3807	1713	2195	1394	3734
ENSMUSG00000014498	Ankrd52	2284	1178	1899	1338	1743	1439	1720	1400	3329	1152	3139	927	1251	1125	1415	1525	2748	1560	2540	1290	1685	1257	1482	1164	2635	1395	2770	1392	1681	1257	1267	1100
ENSMUSG00000014503	Pkd2l2	396	464	293	402	537	603	505	518	231	208	216	242	320	434	288	403	244	373	227	391	547	506	281	457	286	456	255	399	298	313	368	371
ENSMUSG00000014504	Srp19	424	258	437	365	307	343	253	250	729	249	741	222	333	395	305	382	535	370	516	354	363	358	274	342	617	383	534	322	378	255	309	313
ENSMUSG00000014529	Tmbim7	3	11	0	0	17	4	10	9	6	0	0	0	5	6	0	6	3	3	0	4	9	8	0	4	3	7	5	7	0	5	5	4
ENSMUSG00000014542	Clec4f	0	0	0	0	0	0	0	0	0	0	0	0	0	0	0	0	0	0	0	0	0	0	0	0	0	0	0	0	3	0	0	0
ENSMUSG00000014543	Klra17	0	0	0	0	0	0	0	2	0	0	0	0	0	4	0	0	0	0	0	0	0	0	0	0	0	0	0	0	10	0	0	0
ENSMUSG00000014547	Wdfy2	598	382	567	405	337	189	491	266	226	239	229	302	416	211	429	227	149	301	188	347	332	243	427	247	274	372	294	372	347	302	427	295
ENSMUSG00000014550	Rbsn	795	931	832	1148	847	1492	491	1156	840	395	728	655	262	752	348	797	779	805	826	845	329	739	352	832	801	898	889	909	525	892	381	892
ENSMUSG00000014551	Mrps25	1469	891	1293	1392	692	922	596	968	1116	633	903	665	586	813	529	809	1025	1066	973	1000	674	704	535	792	1102	970	905	1041	696	771	410	682
ENSMUSG00000014554	Dguok	525	246	587	446	165	221	243	287	360	312	435	242	96	231	142	382	378	316	356	285	148	227	176	251	414	267	393	273	247	267	106	272
ENSMUSG00000014592	Camta1	1436	441	1106	440	646	1262	572	1198	885	260	757	292	125	555	86	410	1123	184	1206	211	148	678	116	657	1009	320	1027	399	251	374	106	474
ENSMUSG00000014599	Csf1	1008	3737	1198	2458	501	1101	229	1096	68	3746	60	4852	798	5490	437	5452	88	7330	74	7843	683	3831	625	1931	100	4937	84	4895	579	4034	338	8675
ENSMUSG00000014601	Strip1	894	584	1154	847	689	624	739	492	1052	747	1103	544	661	660	731	776	1143	686	1169	566	830	631	831	632	1028	726	1105	682	1078	890	976	807
ENSMUSG00000014602	Kif1a	1256	664	21	421	205	1149	124	1015	8	63	0	61	5	245	0	141	6	138	4	164	20	1064	19	858	3	58	0	163	47	492	5	160
ENSMUSG00000014603	Alx3	0	17	0	35	4	19	0	13	2	42	0	51	0	14	0	9	0	34	0	48	0	30	0	42	0	17	3	30	3	44	0	8
ENSMUSG00000014606	Slc25a11	793	494	1080	708	528	489	481	489	1049	457	1176	615	516	635	635	679	1094	669	1227	633	586	525	621	562	1085	647	1059	653	807	663	642	657
ENSMUSG00000014609	Chrne	11	14	7	2	20	4	15	5	11	32	5	21	5	2	11	6	3	5	4	9	12	6	12	0	5	0	11	11	12	0	13	2
ENSMUSG00000014633	Cmc2	69	56	129	107	53	39	72	52	346	73	340	21	50	88	36	132	214	84	249	68	57	44	64	59	272	81	278	91	73	52	26	66
ENSMUSG00000014668	Chfr	672	348	535	454	366	522	420	530	902	291	926	232	486	325	617	451	809	377	626	374	473	334	708	317	672	412	752	365	516	355	435	290
ENSMUSG00000014686	Ceacam16	3	0	0	0	20	4	5	5	0	0	3	0	5	2	0	2	0	0	4	0	3	4	0	0	0	2	0	0	0	2	0	6
ENSMUSG00000014704	Hoxa2	5	4	9	8	33	19	5	47	2	11	5	11	0	26	0	30	3	3	0	7	0	27	0	29	17	2	7	0	12	15	0	22
ENSMUSG00000014725	Adam28	1550	24	1777	12	468	9	591	5	39	0	36	31	732	2	827	4	26	0	28	2	1068	13	584	0	284	2	215	0	293	11	558	0
ENSMUSG00000014747	Ankrd53	14	11	9	14	7	19	0	26	6	0	9	0	9	10	0	8	3	11	0	4	3	8	4	8	7	5	3	7	12	2	5	2
ENSMUSG00000014748	Tex261	936	988	1180	1425	389	888	372	737	1156	727	1065	554	827	932	908	1138	1238	1175	1178	1128	971	639	797	920	1142	1065	1245	993	945	1086	824	977
ENSMUSG00000014763	Fam120b	837	710	1068	1095	574	1126	577	1018	566	312	608	353	279	547	380	843	681	887	749	815	368	606	457	766	519	841	502	800	598	626	376	576
ENSMUSG00000014767	Tbp	846	464	904	688	518	801	505	661	943	447	883	232	275	340	362	463	743	318	721	396	301	322	360	428	814	423	813	370	415	321	334	281
ENSMUSG00000014769	Psmb1	1509	755	2524	1345	897	896	715	653	3367	1557	3570	1470	1346	1459	1319	1794	3020	1066	3699	1374	1665	1036	1381	1147	3224	1403	3231	1479	1416	1249	1381	1346
ENSMUSG00000014771	Pdcd2	262	106	407	219	142	168	158	183	371	94	324	61	133	98	149	146	291	69	313	98	151	113	184	132	329	116	315	101	169	112	165	84
ENSMUSG00000014773	Dll1	1318	572	1226	475	225	188	239	119	698	312	617	212	50	55	36	92	963	164	838	142	88	101	27	78	926	272	1046	297	181	63	17	62
ENSMUSG00000014776	Nol3	117	155	83	177	89	25	120	28	84	187	80	232	96	178	47	231	88	132	77	127	125	99	79	129	87	193	74	201	78	156	34	181
ENSMUSG00000014778	Fhod1	422	370	523	444	369	523	515	544	153	457	162	474	486	500	876	772	211	715	231	541	550	522	954	485	217	750	181	723	863	694	790	668
ENSMUSG00000014782	Plekhg4	0	9	9	2	10	9	15	20	8	0	0	0	9	18	8	50	0	11	4	6	6	22	12	10	3	2	0	6	5	54	9	58
ENSMUSG00000014786	Slc9a5	33	58	23	39	83	68	53	91	42	73	32	61	71	131	78	201	83	49	37	54	60	115	90	119	45	73	40	71	83	140	93	210
ENSMUSG00000014791	Elmo3	863	83	1064	159	814	47	1162	68	429	198	540	192	856	229	979	327	488	107	577	98	906	72	1171	93	553	155	544	151	921	104	959	281
ENSMUSG00000014813	Stc1	18	95	9	138	850	322	729	287	0	436	0	484	21	147	15	78	6	159	4	640	63	1211	30	540	9	357	3	1428	141	151	22	133
ENSMUSG00000014837	4931428F04Rik	185	185	133	138	320	55	439	72	119	115	109	61	275	153	156	217	108	99	71	88	269	130	221	166	134	155	133	143	136	162	169	161
ENSMUSG00000014846	Tppp3	657	2316	315	1648	386	1649	239	993	66	3725	94	3604	266	1412	362	1089	29	2287	43	2890	74	766	176	1269	166	2136	242	2034	532	2275	241	1095
ENSMUSG00000014850	Msh3	703	468	652	549	712	530	743	679	576	187	522	172	470	354	483	336	522	306	482	288	465	308	442	372	526	338	584	377	481	310	469	257
ENSMUSG00000014852	Adamts13	0	0	3	2	20	4	29	10	0	0	0	11	59	2	71	2	0	0	0	4	88	6	60	0	0	4	3	2	43	0	51	0
ENSMUSG00000014856	Tmem208	330	135	415	283	205	232	329	216	407	332	577	363	387	368	355	458	442	260	500	287	371	278	431	268	371	287	420	293	446	280	296	353
ENSMUSG00000014859	E2f4	874	525	806	717	696	904	772	526	1463	488	1531	554	869	717	880	814	1269	765	1264	702	909	562	906	607	1358	803	1361	706	746	652	718	661
ENSMUSG00000014867	Surf4	2025	2746	2591	3756	2023	3173	1934	2375	4504	3611	4351	3795	3448	5412	3691	5313	3755	4272	4255	3957	5223	3394	3932	4585	3847	4840	3794	4952	4226	5490	3729	5006
ENSMUSG00000014873	Surf2	512	491	571	464	521	629	615	806	633	312	608	433	341	535	387	491	596	471	611	546	431	525	378	477	581	592	521	505	453	388	296	406
ENSMUSG00000014905	Dnajb9	1092	4078	840	1452	3608	6917	2639	7180	578	2200	659	2779	3635	4137	3751	2940	496	2851	479	3901	4334	4632	2653	2592	1280	3797	1021	3868	2466	2150	2429	3222
ENSMUSG00000014907	Naf1	793	683	790	564	1038	1080	758	978	1685	374	1662	383	237	826	334	656	1426	546	1350	615	371	699	494	532	1547	658	1628	683	561	454	372	621
ENSMUSG00000014932	Yes1	1344	1037	1359	1196	1394	1108	1343	1211	1530	509	1478	564	1226	1150	1323	932	1225	947	1169	791	1416	1173	1373	1075	1390	1092	1310	1024	1346	997	1060	900
ENSMUSG00000014956	Ppp1cb	6727	5327	7338	6608	6550	8168	4758	8379	11544	2553	10748	3322	5272	6499	5077	4928	8739	5940	9776	6165	6367	6287	5473	5563	10021	6291	9702	5973	6618	5310	4363	5435
ENSMUSG00000014959	Gorasp2	1557	1524	1601	2229	1704	1811	1681	1331	2620	1640	2405	1802	1695	2027	1798	2221	2006	2092	1994	1996	2367	1304	2133	1731	2263	2276	2356	2237	2065	1938	1816	1976
ENSMUSG00000014980	Tsen15	220	145	235	295	195	164	129	161	326	260	269	232	63	358	71	545	298	306	234	319	40	218	75	285	236	372	252	319	127	338	77	335
ENSMUSG00000015001	Oc90	5	4	5	4	17	2	0	13	0	11	3	0	5	2	4	6	3	3	0	2	15	2	0	0	5	7	0	9	12	2	0	2
ENSMUSG00000015002	Efr3a	2611	3114	2494	4229	1809	2394	1367	2436	2982	1214	2702	1631	2036	2433	1940	2129	2237	2722	2157	2597	2234	1985	1916	2336	2248	2390	2318	2619	2046	2109	1614	2092
ENSMUSG00000015013	Trappc2l	211	135	189	161	83	125	139	145	169	260	142	282	146	194	217	252	96	176	154	199	145	165	191	181	128	181	156	165	188	173	144	176
ENSMUSG00000015016	Acsf3	264	90	227	157	172	85	243	107	175	94	187	172	133	141	139	141	183	113	185	100	128	71	221	146	183	83	164	113	209	107	203	134
ENSMUSG00000015023	Ddx19a	839	661	1132	1002	643	878	610	737	1519	260	1607	464	457	535	667	653	1305	613	1368	610	586	590	483	624	1534	703	1434	687	537	639	402	545
ENSMUSG00000015027	Galns	174	427	211	454	218	206	272	242	90	395	107	504	287	258	550	319	72	454	93	421	550	264	479	329	77	399	70	416	868	322	659	386
ENSMUSG00000015053	Gata2	1379	2959	1377	2374	2178	4042	2272	3359	542	2563	682	1490	1803	1207	2418	1052	717	2287	611	1692	2123	1697	2484	1691	538	2123	506	2010	2475	1830	2209	1328
ENSMUSG00000015083	C8g	33	22	41	37	14	24	77	15	22	21	18	31	9	20	47	34	24	26	13	26	26	25	27	42	26	36	28	38	38	44	22	20
ENSMUSG00000015085	Entpd2	365	1701	523	2078	60	249	96	238	195	519	271	856	92	202	54	292	301	1077	298	1673	57	759	79	749	384	629	324	740	75	324	93	299
ENSMUSG00000015087	Rabl6	1225	879	1453	1028	1190	1376	1215	1154	1568	851	1496	594	628	1301	990	1635	1765	1087	1519	906	988	918	928	1058	1521	1094	1531	1094	1128	1045	908	1397
ENSMUSG00000015090	Ptgds	0	14	3	24	0	4	5	5	2	32	0	0	17	2	4	6	6	0	4	4	23	2	0	4	0	7	3	0	3	4	9	2
ENSMUSG00000015092	Edf1	872	362	1244	584	613	494	581	373	1352	789	1414	776	997	721	834	952	1328	550	1491	650	836	448	693	591	1271	610	1222	639	832	597	896	753
ENSMUSG00000015093	Clic3	126	24	183	24	24	34	48	56	326	21	362	51	30	79	39	99	345	11	510	31	46	22	27	44	346	39	267	35	29	33	9	82
ENSMUSG00000015094	Npdc1	1070	2156	1226	2665	544	985	634	923	498	2345	677	2205	810	1625	727	1809	809	2159	850	2476	802	1833	857	2089	744	1999	691	2172	821	1922	625	1609
ENSMUSG00000015095	Fbxw5	852	419	914	592	468	472	681	478	789	903	866	725	466	701	607	952	845	709	792	665	552	601	670	804	841	721	830	793	861	997	714	894
ENSMUSG00000015112	Slc25a13	677	17	738	82	943	131	977	114	805	11	746	121	981	166	983	245	797	13	819	16	1065	30	1104	25	748	49	763	30	907	32	824	133
ENSMUSG00000015120	Ube2i	2075	1496	1982	1396	1799	1717	2153	1766	2684	1100	2332	997	1292	1330	1280	1398	2366	1273	2298	1210	1787	1631	1501	1373	2347	1316	2421	1359	1521	1442	1593	1383
ENSMUSG00000015126	Tsr3	187	115	233	144	113	143	124	102	317	73	291	131	63	102	100	131	306	105	298	98	80	106	102	123	293	128	271	124	104	79	85	100
ENSMUSG00000015127	Unkl	424	392	399	479	475	619	443	557	189	249	178	232	204	221	156	248	221	354	197	324	298	323	251	308	200	404	221	358	221	292	216	304
ENSMUSG00000015133	Lrrk1	3162	4035	3522	4940	1911	1841	2210	1931	1835	2356	1775	1822	1218	2160	1433	3007	1783	4688	1644	3755	1337	2745	1710	3184	1833	3556	1949	3790	1692	1940	1305	2508
ENSMUSG00000015134	Aldh1a3	80	358	97	343	801	285	829	305	106	21	23	31	117	24	15	25	21	90	16	209	94	560	45	214	102	37	458	131	99	40	13	31
ENSMUSG00000015143	Actn1	2415	1609	2426	2239	8731	3529	10482	4148	14429	1961	13064	1661	5778	5027	7410	5065	13844	3326	12456	2042	7071	4454	5589	4858	14013	2054	14175	2099	10180	3963	8603	4152
ENSMUSG00000015149	Sirt2	804	1345	992	1743	699	1598	610	1425	442	913	453	1108	308	1070	415	1155	607	1277	605	1180	417	1332	431	1439	585	1210	525	1226	558	1372	402	1146
ENSMUSG00000015165	Hnrnpl	5673	5001	6126	4715	5664	6003	5715	6693	7411	5084	7161	4812	3810	5197	4120	5584	7555	4199	7868	3817	4646	6029	4093	5774	6264	5218	6733	4668	4694	6392	4316	5668
ENSMUSG00000015176	Nolc1	1697	1314	1545	1227	2316	3663	1858	3075	3307	664	3031	806	748	1467	823	1228	2977	1236	2552	1175	867	1350	756	922	2798	956	2761	961	917	634	803	1122
ENSMUSG00000015189	Casd1	1221	1024	1250	1004	1529	954	1624	860	713	395	753	474	860	981	1302	1043	637	949	543	879	1254	738	1246	928	786	978	706	921	1343	1102	854	947
ENSMUSG00000015202	Cnksr3	909	997	902	872	906	719	839	764	585	1028	693	1168	370	822	330	676	419	676	418	704	493	850	356	551	532	1126	555	1077	375	430	343	805
ENSMUSG00000015214	Mtmr1	1089	785	908	884	587	626	491	627	909	467	932	333	532	701	724	702	786	1014	694	1059	790	660	565	675	901	944	777	1012	966	606	672	701
ENSMUSG00000015217	Hmgb3	424	108	453	233	412	154	315	132	807	135	839	71	906	163	532	132	550	65	681	58	903	146	573	223	704	78	643	103	493	176	516	133
ENSMUSG00000015222	Map2	1032	293	203	113	261	3056	101	2422	57	52	34	121	30	245	36	145	165	34	249	108	23	574	42	611	64	52	59	60	115	275	22	161
ENSMUSG00000015224	Cyp2j9	249	767	335	923	80	318	72	386	113	166	111	131	0	55	15	55	188	406	166	515	37	304	19	253	123	283	110	408	36	190	22	105
ENSMUSG00000015242	Nipsnap3a	0	22	3	2	4	2	15	15	0	0	0	41	0	6	0	4	0	0	0	16	0	11	0	6	0	4	0	7	0	0	0	4
ENSMUSG00000015243	Abca1	7333	11445	6122	11517	6247	5298	5510	5974	68	5520	103	5990	1159	7684	954	8484	239	7388	252	8114	1464	13964	1695	11735	331	10318	246	10338	2824	12286	558	9031
ENSMUSG00000015247	Nipsnap3b	391	226	493	216	485	247	353	162	418	208	415	222	806	442	876	456	311	295	231	292	1104	274	887	300	346	364	412	317	802	410	790	317
ENSMUSG00000015289	Lage3	172	103	209	136	93	15	139	52	246	322	291	151	100	100	107	127	239	103	301	137	49	97	113	110	246	100	248	88	115	81	106	122
ENSMUSG00000015290	Ubl4a	573	273	768	394	462	394	372	316	784	581	804	272	378	465	380	633	866	450	911	438	425	351	416	447	767	462	758	389	469	333	338	456
ENSMUSG00000015291	Gdi1	1772	1516	1491	1762	1635	2634	1858	2323	709	1277	797	1611	1205	1959	1443	2117	1005	2513	911	2197	1328	1813	1418	2217	807	2292	760	1780	2318	2707	1546	1961
ENSMUSG00000015305	Sash1	2944	7098	3083	5847	3644	5907	2443	6604	744	2522	806	3121	2293	3390	1440	3453	1079	3169	1089	4867	2602	6813	1815	5988	1079	3506	916	3353	1889	5037	1474	4885
ENSMUSG00000015312	Gadd45b	1474	6448	1399	2144	3453	7496	3072	7526	349	4513	375	4168	1915	2712	1216	2319	517	3405	448	3736	1390	5548	1598	4604	1083	2689	708	2948	1327	2926	1263	3410
ENSMUSG00000015314	Slamf6	0	0	0	0	0	0	5	2	0	0	0	0	5	0	0	0	0	0	0	0	0	0	0	0	3	0	0	0	3	0	0	2
ENSMUSG00000015316	Slamf1	0	0	0	0	4	0	0	0	0	0	0	11	0	2	0	4	0	0	0	0	0	4	0	0	0	0	0	0	8	2	0	0
ENSMUSG00000015335	Zdhhc12	115	22	111	39	27	14	34	44	128	52	127	21	121	86	110	99	119	49	93	41	46	43	105	80	87	34	93	30	115	57	98	66
ENSMUSG00000015337	Endog	132	71	203	115	76	128	153	132	215	229	225	71	133	81	125	106	216	95	175	110	131	71	135	110	253	102	208	108	150	77	191	105
ENSMUSG00000015340	Cybb	42	0	37	2	37	2	5	7	2	0	0	91	25	110	29	132	11	3	0	7	12	22	8	4	11	2	7	0	106	51	22	154
ENSMUSG00000015341	Golga7	1144	864	1086	966	692	649	715	622	1799	664	1846	433	1633	881	1635	857	1197	1045	1332	887	1923	848	1317	885	1519	776	1441	764	1554	824	1533	825
ENSMUSG00000015342	Xk	332	90	277	115	172	72	158	102	206	11	238	21	204	82	117	66	134	63	132	53	281	109	135	76	193	39	160	43	155	93	110	48
ENSMUSG00000015354	Pcolce2	16	1316	13	1022	129	53	72	98	111	530	83	625	192	65	167	67	101	2120	83	3385	216	304	188	172	64	1110	72	1029	176	275	186	78
ENSMUSG00000015355	Cd48	0	2	0	0	4	0	0	0	0	0	0	0	9	4	0	0	0	3	0	0	6	2	0	0	0	0	0	2	5	2	0	2
ENSMUSG00000015357	Clpx	1546	804	1609	1078	775	1066	791	999	1229	332	1223	474	524	690	607	769	974	665	921	707	674	588	509	619	1180	769	1275	629	643	579	486	596
ENSMUSG00000015363	Trabd	1131	323	1381	427	514	427	577	334	1052	623	1045	323	948	496	944	691	969	506	1074	421	1011	385	1190	402	1074	640	1056	625	1085	528	1250	527
ENSMUSG00000015365	Mov10l1	0	0	0	0	0	0	0	0	0	0	0	0	0	2	0	2	0	0	0	2	0	0	0	0	0	0	3	0	0	0	0	2
ENSMUSG00000015377	Dennd6b	310	115	249	72	307	199	396	230	119	32	116	71	187	84	203	141	170	95	123	90	233	118	247	151	109	81	139	78	165	132	233	145
ENSMUSG00000015396	Cd83	5	29	5	32	182	677	139	465	0	11	3	21	92	22	68	16	16	7	7	11	111	43	57	42	3	7	5	6	80	32	51	2
ENSMUSG00000015401	Tmem27	0	0	0	0	0	2	0	0	0	0	0	0	0	0	0	0	0	0	0	0	0	0	0	2	0	0	0	0	0	0	0	0
ENSMUSG00000015405	Ace2	152	4	233	32	4	0	10	2	93	11	78	21	0	8	0	18	65	3	154	4	0	2	0	4	75	10	108	7	0	2	0	10
ENSMUSG00000015437	Gzmb	0	0	0	0	0	0	0	0	0	0	0	0	0	4	0	2	0	0	0	0	0	0	0	0	0	0	0	0	3	2	0	0
ENSMUSG00000015441	Gzmf	0	0	0	0	0	0	0	0	0	0	0	0	0	0	0	0	0	0	0	0	0	0	0	0	0	0	0	0	0	0	0	0
ENSMUSG00000015443	Gzmn	0	0	0	0	0	0	0	0	0	0	0	0	0	0	0	0	0	0	0	0	0	0	0	0	0	0	0	0	0	0	0	0
ENSMUSG00000015451	C4a	36	422	17	202	155	118	124	175	46	2470	14	2104	237	278	291	257	52	753	47	882	377	258	375	187	15	870	28	971	169	421	212	256
ENSMUSG00000015452	Ager	18	27	15	10	20	20	58	23	8	11	7	21	17	12	18	18	6	11	0	12	9	34	27	27	9	17	15	18	29	24	30	19
ENSMUSG00000015461	Atf6b	516	394	690	419	452	472	534	423	880	768	868	816	657	717	823	920	1051	613	1102	630	615	550	756	685	831	629	939	610	800	1058	664	757
ENSMUSG00000015467	Egfl8	88	78	85	70	63	93	34	111	68	104	49	51	30	65	71	101	49	72	40	59	60	81	49	48	56	97	63	74	85	85	34	55
ENSMUSG00000015468	Notch4	27	48	21	22	106	78	243	101	15	52	3	11	171	20	135	36	3	30	4	29	159	92	277	74	22	23	24	12	340	66	334	38
ENSMUSG00000015474	Ppt2	205	202	251	276	126	249	96	263	220	135	258	242	63	258	114	273	239	249	175	211	91	244	124	308	191	226	210	170	200	297	106	218
ENSMUSG00000015476	Prrt1	14	76	9	78	17	105	10	98	0	21	0	31	0	26	15	25	3	170	0	135	15	85	8	74	0	70	0	57	10	40	0	19
ENSMUSG00000015478	Rnf5	238	138	305	200	145	141	191	127	246	239	371	101	374	196	401	196	321	197	335	165	405	123	386	183	318	177	278	160	427	236	478	178
ENSMUSG00000015484	Fam163a	66	22	3	4	14	2	10	7	0	0	3	11	0	14	15	13	0	7	0	11	12	15	0	23	3	4	0	9	29	4	17	11
ENSMUSG00000015488	Cacfd1	764	523	882	958	1022	659	1101	640	778	623	677	655	3112	850	2418	1175	958	916	988	751	3273	955	2814	1143	860	1076	790	1087	1803	983	3400	916
ENSMUSG00000015501	Hivep2	3662	3820	2482	2136	6734	6422	5867	6932	1240	1878	1258	1541	9579	5418	9328	3214	1318	2529	1016	3637	9033	6518	6779	2798	2246	2026	2005	2066	8308	2282	10364	4398
ENSMUSG00000015519	2310057J18Rik	6051	9	0	2	0	0	0	0	28	0	65	0	5	0	0	0	3	0	10	189	0	0	30	0	263	15	124	2	518	0	0	0
ENSMUSG00000015522	Arnt	1713	3059	1685	3271	1628	2544	1534	2538	1523	1650	1425	2004	765	2287	876	2384	1328	3104	1408	2897	906	2629	1130	2730	1358	3670	1298	3778	1463	2691	1060	2616
ENSMUSG00000015533	Itga2	1109	138	816	150	659	262	1091	271	1596	83	1460	21	4333	752	2592	633	1664	36	1602	51	3610	427	1841	272	1568	116	1705	113	1128	708	2302	1070
ENSMUSG00000015536	Mocs2	874	352	886	481	498	853	334	614	487	239	473	333	615	891	504	697	309	406	316	497	813	634	412	657	458	422	437	490	476	779	431	824
ENSMUSG00000015542	Nat9	123	105	181	144	99	118	110	122	133	94	147	41	88	108	142	115	142	113	157	75	117	85	87	78	174	113	135	76	134	93	119	114
ENSMUSG00000015568	Lpl	53	4179	63	1150	304	399	172	675	8	2013	7	2829	17	8912	93	17024	29	1683	13	3333	108	4172	128	4730	9	2154	7	2592	1039	7942	148	12045
ENSMUSG00000015575	Atp6v0e	617	395	1000	747	663	419	601	308	1739	965	1629	947	1288	1225	1238	1417	1580	1035	1960	1072	1552	860	1261	885	1642	898	1535	1010	1437	1091	1419	1227
ENSMUSG00000015579	Nkx2-5	0	0	0	0	0	0	0	0	0	0	0	0	0	0	0	0	0	0	0	2	0	0	0	0	0	0	0	0	3	0	0	0
ENSMUSG00000015597	Zfp318	1550	1141	1347	1398	827	1290	777	1344	767	498	719	302	457	807	720	1034	853	1068	654	876	470	871	614	1056	863	1149	901	1089	600	1141	545	845
ENSMUSG00000015599	Ttbk1	18	34	0	14	33	29	10	34	0	21	0	41	0	20	0	9	0	46	0	41	3	34	0	40	0	55	0	43	5	32	9	17
ENSMUSG00000015605	Srf	841	1229	714	607	3707	4290	3996	2320	1089	1401	1012	947	1845	1082	1220	1059	1128	818	1086	1466	1504	1197	1523	1071	1269	927	1245	962	1268	1431	1322	1341
ENSMUSG00000015619	Gata3	1351	106	1180	394	27	9	81	13	478	498	508	172	30	116	22	118	409	13	365	63	63	51	23	83	1409	134	918	233	150	65	13	95
ENSMUSG00000015627	Gata5	0	26	7	39	33	5	5	9	0	52	0	21	5	309	25	429	6	28	0	66	0	27	4	29	0	63	0	291	47	27	17	341
ENSMUSG00000015647	Lama5	9236	363	7855	832	15695	922	19410	1362	4853	1017	4701	403	27914	3809	28103	5995	7756	141	4828	207	24927	1280	32314	753	7877	560	7533	567	23884	1776	31761	3841
ENSMUSG00000015652	Steap1	27	16	33	22	27	7	24	4	64	21	43	0	183	401	227	480	70	13	50	7	343	22	262	23	79	10	78	19	85	18	110	274
ENSMUSG00000015653	Steap2	1261	785	1014	1281	468	439	291	559	727	156	693	333	1002	1750	773	1845	637	533	645	591	1362	557	1486	551	752	473	756	449	535	529	664	1460
ENSMUSG00000015656	Hspa8	10696	14844	11118	8515	13270	18650	10586	20789	16475	14763	15939	23303	11760	12405	12178	16049	18828	11762	16922	14561	12911	13678	10972	12163	18304	17784	17171	17206	10138	8331	9675	13212
ENSMUSG00000015659	Serac1	418	609	409	592	412	345	324	467	195	260	176	272	212	266	220	303	214	377	237	367	332	301	341	242	136	322	183	327	270	236	207	247
ENSMUSG00000015665	Awat1	0	0	0	0	0	0	0	0	0	0	0	0	0	0	0	0	0	0	0	0	0	2	0	0	0	0	0	0	0	0	0	0
ENSMUSG00000015668	Pdzd11	205	116	225	188	159	72	124	77	438	218	431	252	150	248	146	254	363	187	353	164	156	153	176	166	392	192	366	175	155	170	148	167
ENSMUSG00000015671	Psma2	1006	513	1467	1031	580	629	472	442	3114	882	3146	725	997	1086	1199	1208	2055	839	2338	933	1257	673	958	783	2608	1059	2442	988	1085	948	1031	939
ENSMUSG00000015672	Mrpl32	398	120	453	237	208	141	205	146	756	270	837	121	295	272	383	380	630	189	663	231	301	174	300	251	638	240	628	252	329	212	309	272
ENSMUSG00000015697	Setdb1	1342	794	1317	902	887	972	1081	1052	1234	478	1247	413	665	600	812	923	1138	692	1194	598	790	674	992	907	1246	829	1258	692	853	761	735	632
ENSMUSG00000015702	Anxa9	84	169	107	138	83	153	67	148	95	104	78	101	54	245	64	391	54	65	68	58	63	160	72	155	83	63	95	59	120	60	102	265
ENSMUSG00000015709	Arnt2	119	1397	145	1417	2745	381	3391	285	8	281	18	101	25	120	50	117	36	515	25	308	117	583	165	675	9	221	13	187	104	339	47	89
ENSMUSG00000015711	Prune1	376	182	579	318	215	209	201	219	713	322	848	282	167	237	220	375	601	308	642	273	210	262	229	321	702	417	712	401	354	371	237	339
ENSMUSG00000015714	Cers2	1643	1442	2016	1776	1285	1862	967	1574	1458	965	1513	997	1118	1914	1263	2013	1474	2065	1200	1855	1294	1461	1261	1720	1574	1856	1625	1669	1777	2216	1445	1983
ENSMUSG00000015721	Nlrp5	0	0	0	2	0	4	0	2	0	0	0	0	0	0	0	0	0	0	0	0	0	0	0	0	0	0	0	0	0	2	0	0
ENSMUSG00000015733	Capza2	2606	2129	2741	2469	2293	2236	1724	2033	4135	1111	3832	1470	3668	2841	2922	2402	2925	2038	2877	2291	3618	2345	2623	2102	3720	2430	3469	2308	3159	2158	2830	2215
ENSMUSG00000015745	Plekho1	33	127	19	165	126	461	72	408	20	301	29	141	34	227	54	208	16	99	19	191	49	490	57	634	22	177	28	167	183	631	13	236
ENSMUSG00000015747	Vps45	268	110	303	161	175	121	172	112	380	229	369	232	221	200	263	271	262	205	295	219	258	151	307	202	265	201	341	178	282	217	313	201
ENSMUSG00000015748	Prpf3	492	374	505	404	462	601	472	484	535	249	606	172	316	248	351	426	558	293	504	345	337	318	386	276	475	357	458	283	268	222	271	292
ENSMUSG00000015749	Anp32e	1419	1239	1531	1498	1325	2263	781	2365	3302	696	2889	776	524	1057	614	885	2414	1127	2534	1295	736	980	618	805	2843	1187	2704	1106	786	906	651	961
ENSMUSG00000015750	Aph1a	424	340	748	551	264	267	272	292	756	405	704	272	582	512	702	632	874	460	890	517	708	402	708	398	829	518	960	576	729	650	566	511
ENSMUSG00000015755	Tab2	3996	3410	4077	3831	3493	4232	2362	3700	4711	4420	4668	4560	2555	4352	2454	3657	4985	3670	5040	3471	3363	3272	2301	3107	3940	7492	3889	5867	2719	4370	2433	4244
ENSMUSG00000015757	Ppil4	1212	1115	1367	1417	1078	1490	991	1240	1414	436	1327	594	470	916	639	892	1364	1231	1132	1089	768	932	554	1011	1297	1121	1164	1229	755	722	457	742
ENSMUSG00000015759	Cnih1	747	706	934	1134	383	373	310	313	1854	706	1735	745	578	1289	642	1417	1626	1152	1884	1180	637	638	595	794	1500	1052	1531	1056	685	1091	549	1090
ENSMUSG00000015766	Eps8	2158	2131	1815	1845	2633	1495	2348	1680	164	1474	111	1641	12379	2290	9906	2080	265	2456	264	2163	12537	2154	8915	1684	496	2354	519	2196	6121	1460	10469	1867
ENSMUSG00000015776	Med22	668	402	922	578	442	479	591	449	894	343	846	554	383	551	490	584	884	527	1049	398	527	611	423	547	1009	420	899	445	612	551	664	538
ENSMUSG00000015787	Abo	0	0	0	0	4	0	0	2	0	0	0	0	0	0	8	0	0	0	0	0	0	0	0	2	0	0	0	0	0	0	0	2
ENSMUSG00000015790	Surf1	499	510	551	617	412	466	415	583	362	260	358	292	279	377	295	385	314	406	316	457	363	343	371	351	344	417	347	456	394	327	271	342
ENSMUSG00000015804	Med28	429	397	497	460	373	391	410	352	509	364	524	544	416	375	380	487	442	485	537	470	448	348	446	391	564	449	452	401	432	380	385	373
ENSMUSG00000015806	Qdpr	365	185	523	347	254	183	224	217	402	208	453	111	216	194	316	213	409	189	458	248	247	143	296	163	447	165	439	235	331	197	347	192
ENSMUSG00000015812	Gnrh1	38	36	35	8	70	27	24	26	24	73	9	31	79	47	75	22	18	26	7	44	97	51	45	53	13	34	30	31	33	13	47	31
ENSMUSG00000015829	Tnr	264	46	11	6	4	5	5	7	19	21	9	41	0	4	8	15	16	3	0	2	15	20	12	17	11	39	21	78	5	24	5	11
ENSMUSG00000015837	Sqstm1	3794	9334	3296	7093	8889	14361	7744	13367	1630	14255	1689	16287	20936	15808	14986	11642	1688	8920	1194	11940	14660	13794	10856	9809	2911	12013	2503	12299	10225	11120	12728	17325
ENSMUSG00000015839	Nfe2l2	4171	3378	4247	3944	3301	3281	2015	2844	3618	2117	3727	2718	2912	2388	3248	2375	3267	3359	3273	3775	3618	2952	2668	2645	3699	3888	3450	3757	2501	2493	1956	1846
ENSMUSG00000015843	Rxrg	0	48	0	20	4	2	5	2	0	0	0	0	0	2	0	6	0	5	0	19	0	8	4	6	5	4	0	11	0	2	0	4
ENSMUSG00000015846	Rxra	2720	1545	2867	2035	762	1316	739	1112	2664	1972	2574	1329	557	695	617	1010	3536	1252	3298	1268	578	1066	670	1297	3074	1806	3210	1917	708	1287	423	995
ENSMUSG00000015850	Adamtsl4	1144	1064	1361	809	676	669	724	1315	62	706	56	776	212	274	238	234	44	590	50	788	193	515	367	425	96	718	122	890	340	317	153	370
ENSMUSG00000015852	Fcrls	0	0	0	0	4	2	0	0	0	0	0	0	5	10	8	8	0	5	0	4	0	23	0	0	0	0	0	0	31	10	0	10
ENSMUSG00000015854	Cd5l	0	0	0	0	0	0	0	0	0	0	0	11	0	0	0	0	0	0	0	0	0	0	0	0	0	0	0	2	0	0	0	0
ENSMUSG00000015869	Prpsap1	918	738	922	973	709	797	1077	840	1018	862	1070	635	412	895	607	1182	1115	1016	1040	832	504	1155	599	1288	964	1004	1002	995	783	1260	511	843
ENSMUSG00000015879	Fam184b	86	86	69	18	162	37	143	70	13	11	9	71	175	18	281	13	3	28	4	38	233	41	281	21	5	41	17	30	361	21	262	17
ENSMUSG00000015880	Ncapg	191	59	237	109	201	30	201	44	1101	73	1083	141	171	133	245	129	1233	65	1154	78	258	113	296	115	964	139	868	131	169	123	98	113
ENSMUSG00000015882	Lcorl	1276	437	1212	500	1483	423	1329	585	700	530	724	534	1936	779	2199	660	720	579	681	509	1903	890	1848	913	719	714	748	793	1439	749	1403	610
ENSMUSG00000015889	Lta4h	872	1523	1018	2142	495	904	534	803	1234	903	1436	927	349	846	571	904	1359	1160	1322	1035	436	1053	412	1013	1182	1440	1269	1418	516	1016	275	668
ENSMUSG00000015890	Amdhd1	0	6	5	4	17	4	53	2	2	0	23	0	0	2	4	16	8	0	0	0	0	2	0	2	22	13	13	9	5	0	5	2
ENSMUSG00000015932	Dstn	6404	4574	8121	6839	11712	7744	10377	7740	11157	3839	10176	4812	19050	7948	12767	7597	10054	5463	10082	5495	15688	6509	10303	7939	10599	5947	10248	5303	10227	6616	11943	6160
ENSMUSG00000015937	H2afy	2352	876	2591	1183	1832	1152	1791	978	3498	810	3574	987	2106	1127	2156	1199	3200	1025	3200	921	2336	817	2335	849	3175	1022	3338	1036	2018	1069	2036	1080
ENSMUSG00000015942	Gtf2ird2	400	300	473	328	307	471	462	437	242	73	134	162	237	219	234	259	270	297	231	256	207	301	255	329	189	235	227	245	249	343	229	225
ENSMUSG00000015943	Bola1	154	63	135	92	70	67	134	73	315	291	256	71	113	57	93	97	257	59	264	91	63	48	87	50	257	70	198	91	101	73	106	91
ENSMUSG00000015944	Gatsl2	332	699	289	735	119	330	15	305	329	322	320	252	212	434	164	468	221	444	246	421	221	474	244	445	236	353	299	291	214	736	216	509
ENSMUSG00000015947	Fcgr1	3	4	3	4	7	0	10	15	0	11	0	0	5	6	11	13	3	3	7	7	3	13	8	8	0	4	3	7	19	4	5	8
ENSMUSG00000015950	Ncf1	16	32	21	16	40	24	15	30	6	11	0	11	5	49	8	78	3	11	4	11	23	39	4	17	3	12	0	12	43	27	13	57
ENSMUSG00000015957	Wnt11	1070	511	1266	181	814	169	520	120	2	343	3	232	13	250	4	169	16	304	16	317	12	248	15	115	22	147	13	220	33	49	13	185
ENSMUSG00000015961	Adss	2659	1299	2967	1235	2527	1940	2720	1878	3440	1048	3364	1178	3386	2751	2567	1808	2681	1503	2445	1369	3805	3184	2948	1982	3631	1895	3687	1729	2878	1620	2450	2242
ENSMUSG00000015962	1700016C15Rik	36	21	35	0	33	14	15	5	8	11	7	61	38	36	32	11	6	15	13	14	49	29	27	14	13	25	7	45	61	15	26	20
ENSMUSG00000015966	Il17rb	95	64	67	53	2893	105	2839	136	70	0	78	0	138	12	96	16	226	13	221	46	168	43	277	21	81	36	131	45	99	15	77	10
ENSMUSG00000015968	Cacna1d	240	36	285	70	531	1210	443	2074	180	52	196	51	154	102	270	138	370	17	375	27	295	171	330	191	276	44	265	62	446	151	203	261
ENSMUSG00000015970	Chdh	1122	68	1248	291	2942	116	2696	166	1234	260	1420	21	1953	14	2617	48	2350	15	2381	24	2724	34	3465	10	1456	171	1481	196	3586	81	2218	17
ENSMUSG00000015971	Actr8	554	417	547	601	435	431	515	447	458	187	469	212	262	297	305	407	429	304	375	305	289	285	352	287	437	348	393	333	373	341	300	279
ENSMUSG00000015980	Lrrc27	38	69	35	64	53	37	34	49	13	63	14	31	17	61	32	62	13	97	19	107	9	37	15	53	9	81	5	95	24	59	9	69
ENSMUSG00000015981	Stk32c	38	118	9	119	40	126	20	123	10	104	5	31	9	57	22	43	0	151	4	122	12	95	4	46	0	108	9	131	8	22	5	44
ENSMUSG00000015994	Fnta	1116	797	1529	1312	857	773	681	738	1430	561	1556	604	993	908	922	1120	1292	979	1172	852	1102	739	846	841	1324	988	1189	819	1018	804	845	930
ENSMUSG00000016018	Skiv2l2	1351	1111	1387	1291	1417	1487	1305	1387	1681	415	1527	514	761	1096	862	1178	1634	1068	1497	963	663	1024	831	926	1437	1149	1365	1082	903	788	769	956
ENSMUSG00000016024	Lbp	178	1990	119	1161	3598	280	3434	282	17	4078	18	5970	1434	906	2028	1340	18	4122	34	5179	2902	3068	2462	1571	37	4479	47	3709	2046	2724	1715	1404
ENSMUSG00000016028	Celsr1	9778	355	9770	1822	4211	146	4605	149	7386	1868	7898	554	2962	982	3904	1271	11289	72	9806	162	4028	127	5361	95	9089	917	9844	836	4413	181	3476	1287
ENSMUSG00000016087	Fli1	11	76	5	132	172	298	105	224	0	63	0	41	9	110	0	95	6	80	7	78	15	129	0	89	3	54	0	84	87	121	5	136
ENSMUSG00000016128	Stard13	655	2344	487	1591	1424	1727	1501	1711	1870	1328	1926	1541	1139	3518	695	2585	812	1457	678	1909	963	4730	438	2986	2108	1700	1938	1885	1250	2683	1453	3239
ENSMUSG00000016150	Tenm1	27	41	5	39	251	85	153	180	0	32	0	61	138	45	160	6	16	42	0	58	60	6	105	21	3	97	3	214	45	27	199	20
ENSMUSG00000016179	Camk1g	104	26	47	28	149	63	81	60	19	52	25	11	312	30	376	64	34	23	37	9	275	137	259	159	43	26	63	19	586	104	469	51
ENSMUSG00000016181	Diexf	490	259	541	357	383	411	267	416	569	156	577	222	108	334	121	313	612	268	497	278	134	346	165	272	598	259	599	252	190	186	106	228
ENSMUSG00000016194	Hsd11b1	11	315	5	218	30	144	15	164	0	249	0	484	21	200	15	234	0	209	4	588	9	178	45	240	7	505	7	825	19	280	22	169
ENSMUSG00000016200	Syt14	47	19	0	0	4	4	5	13	0	0	0	0	5	0	0	0	3	0	0	0	3	9	0	8	0	2	0	0	5	4	0	6
ENSMUSG00000016206	H2-M3	36	115	83	169	37	63	20	70	4	73	12	51	42	102	15	95	6	176	10	172	9	113	34	108	13	132	15	172	31	129	22	111
ENSMUSG00000016239	Lonrf3	174	1247	181	454	946	1876	948	2132	288	281	291	313	636	654	724	398	270	431	237	539	702	1155	752	670	259	441	341	509	504	518	583	635
ENSMUSG00000016252	Atp5e	411	172	690	276	330	123	358	104	874	2584	912	1198	561	533	582	561	737	283	1111	275	422	257	356	353	632	269	674	322	469	303	334	408
ENSMUSG00000016253	Nelfcd	440	251	413	400	251	244	448	211	389	332	477	212	221	315	291	377	491	324	528	283	230	202	356	285	390	274	443	254	361	343	267	332
ENSMUSG00000016255	Tubb1	0	2	0	0	0	2	15	0	0	0	0	0	9	0	0	0	0	0	0	0	3	2	0	0	0	0	0	0	0	0	0	2
ENSMUSG00000016256	Ctsz	319	1022	333	1163	495	902	501	716	144	1225	120	1168	333	1260	291	1486	273	1217	289	1285	363	1292	315	1401	145	1055	204	1108	385	1467	241	1357
ENSMUSG00000016257	Slmo2	404	179	381	283	264	381	215	175	1145	229	1114	262	320	410	337	463	871	278	856	271	448	195	300	221	1002	327	973	305	366	355	317	317
ENSMUSG00000016262	Sertad4	1212	293	1270	466	481	272	439	441	883	63	713	71	308	387	330	616	1210	138	1092	224	544	167	345	191	1144	110	1113	91	629	190	351	413
ENSMUSG00000016283	H2-M2	5	2	33	2	4	0	0	0	0	0	0	0	0	2	0	6	0	0	0	0	0	6	0	0	0	2	0	2	8	0	0	4
ENSMUSG00000016308	Ube2a	369	355	481	355	383	457	362	447	927	405	1068	464	466	572	550	533	694	519	780	492	552	443	378	425	829	549	735	511	450	375	427	505
ENSMUSG00000016319	Slc25a5	3574	1106	5243	1681	1714	1839	1362	1399	8966	2542	9708	2255	2929	3036	3677	3102	9399	2044	10174	1980	3672	2189	3255	1833	8750	2366	8902	2352	4174	2368	3501	2618
ENSMUSG00000016327	Atp1b4	0	2	3	0	27	7	5	26	4	11	0	21	0	20	0	4	0	7	0	0	3	4	0	10	0	7	0	4	5	0	5	11
ENSMUSG00000016344	Ppdpf	174	140	211	165	99	83	143	62	357	260	307	202	308	172	348	173	196	103	295	130	281	134	345	189	276	118	265	143	322	190	313	163
ENSMUSG00000016346	Kcnq2	178	21	0	0	40	0	67	0	0	0	3	0	5	0	0	0	3	0	0	4	6	0	15	0	0	0	0	0	0	0	9	2
ENSMUSG00000016349	Eef1a2	499	81	0	4	7	17	0	41	0	0	0	21	17	40	11	74	0	15	0	19	29	20	12	21	0	4	0	2	8	4	22	22
ENSMUSG00000016356	Col20a1	82	264	61	101	366	126	596	211	13	83	14	41	121	69	139	69	18	128	10	213	168	151	206	180	15	100	9	93	181	90	203	78
ENSMUSG00000016382	Pls3	3021	2507	3606	3165	4184	2352	3677	2363	6217	1017	5333	1692	2746	2978	1816	3576	3899	2552	4190	2570	2058	2150	1762	2485	5630	2150	5144	2107	1735	2214	1107	2730
ENSMUSG00000016386	Mpped2	238	4	229	12	73	5	34	4	8	0	0	0	13	8	4	4	16	0	10	2	26	6	15	8	9	4	0	4	40	4	39	11
ENSMUSG00000016409	Nkap	714	659	726	884	356	715	267	530	733	332	706	101	279	492	376	479	689	617	663	563	343	474	352	472	769	595	605	558	446	540	372	489
ENSMUSG00000016427	Ndufa1	251	127	285	229	103	115	62	81	384	675	435	433	183	346	188	357	250	191	353	209	153	167	169	157	363	269	334	291	209	242	148	237
ENSMUSG00000016458	Wt1	7	1792	19	1371	1183	6586	191	4963	0	1463	0	1782	25	3477	54	3109	0	1840	0	1343	97	2327	57	2191	5	2039	5	2200	509	1795	81	3248
ENSMUSG00000016477	E2f3	462	74	453	76	531	93	496	85	665	104	628	131	133	373	185	340	512	126	516	144	247	206	244	236	619	118	656	110	289	234	203	375
ENSMUSG00000016481	Cr1l	1195	1106	1303	1808	831	1003	1091	1028	854	758	821	715	856	1252	834	1196	961	1296	1056	1303	988	1127	898	1062	742	1330	836	1121	938	906	900	927
ENSMUSG00000016487	Ppfibp1	4569	4887	5195	5504	3980	2817	3748	2954	5098	3030	4615	4721	1957	9873	2287	9975	3380	11100	2669	9781	2763	11379	2511	11841	3940	10806	3970	9045	3895	12056	2627	10847
ENSMUSG00000016493	Cd46	181	147	105	130	162	138	143	214	35	115	23	61	63	96	82	97	29	138	31	107	97	125	79	149	30	87	32	117	64	84	148	86
ENSMUSG00000016494	Cd34	53	9719	83	9674	534	3145	358	2758	19	11703	16	15784	63	11304	71	13152	18	23499	43	22965	128	6032	120	8615	64	20612	80	21746	1955	22567	136	15158
ENSMUSG00000016495	Plgrkt	462	382	429	388	257	310	343	342	620	353	557	222	179	444	199	523	601	362	675	371	122	366	169	428	477	333	515	355	179	308	148	413
ENSMUSG00000016496	Cd274	137	286	99	262	192	211	134	263	55	187	34	232	196	293	43	169	67	230	71	263	170	220	94	144	75	288	76	310	83	135	34	266
ENSMUSG00000016498	Pdcd1lg2	0	0	0	0	0	2	0	0	0	0	0	0	0	4	0	4	0	0	0	0	3	2	0	2	0	0	0	0	0	2	0	4
ENSMUSG00000016503	Gtf3a	437	179	617	367	136	151	191	151	900	343	910	474	291	340	334	489	981	272	982	278	315	169	408	253	738	240	807	242	436	256	338	304
ENSMUSG00000016510	Mtif3	521	214	796	491	136	191	215	222	927	374	941	433	316	332	401	494	1017	299	1007	283	383	181	416	264	797	267	771	278	439	275	372	299
ENSMUSG00000016520	Lnx2	848	1128	888	810	472	467	496	671	1995	1588	2052	1500	798	1199	1224	1532	1729	1672	1635	1626	850	989	872	1152	1941	2404	1714	1999	1643	1624	959	1296
ENSMUSG00000016524	Il19	0	2	0	2	7	0	0	2	0	11	0	11	0	8	0	0	3	0	4	7	0	9	0	10	0	17	9	9	3	2	0	2
ENSMUSG00000016526	Dyrk3	176	26	185	28	244	83	186	78	128	21	205	11	96	73	139	88	108	17	145	22	193	20	154	33	210	31	192	38	254	24	207	71
ENSMUSG00000016528	Mapkapk2	1851	2215	2304	1741	2857	3857	2691	3087	2190	2812	2192	2447	1874	3913	1546	4336	2104	2134	2019	2797	2245	3021	1699	2295	2157	2903	2283	2984	1739	2995	1419	3825
ENSMUSG00000016529	Il10	11	53	9	12	129	44	81	109	0	94	3	91	25	455	15	273	3	17	7	81	29	118	15	66	3	49	15	98	57	30	9	152
ENSMUSG00000016534	Lamp2	7370	10887	7779	15129	8885	10842	6715	10546	6802	4389	6851	5527	5155	11044	5343	11241	7791	8084	8217	9514	7210	12225	5395	12964	6429	8645	6721	8535	6154	15041	3949	11981
ENSMUSG00000016541	Atxn10	2082	1566	2416	2529	1289	1447	1334	1307	2742	1287	2545	1541	736	2158	731	2377	2651	1911	2767	2146	960	1550	794	1999	2809	2108	2677	1856	1055	2211	714	2171
ENSMUSG00000016552	Foxred2	185	234	225	272	139	323	229	308	48	32	63	71	17	51	29	57	101	67	120	112	26	67	12	80	62	66	84	83	54	57	26	62
ENSMUSG00000016554	Eif3d	1585	861	2132	1541	1298	1440	1153	1153	3521	1235	3545	1208	1247	1369	1472	1834	3441	1075	3629	1099	1639	1055	1669	1096	3082	1253	3038	1260	1442	1220	1259	1370
ENSMUSG00000016559	H3f3b	9139	9062	8802	6323	12895	14230	10691	16055	8121	6370	8126	5819	9276	7556	9445	6491	6936	5194	5951	6493	8521	7003	8844	6008	10017	5664	9131	5763	8908	6979	9350	7343
ENSMUSG00000016619	Nup50	1234	1279	1291	840	1509	1864	1205	1349	2382	934	2248	1007	1500	1160	1624	1073	1775	1162	1654	1140	2118	1819	1605	1575	2089	1432	2018	1233	1814	1395	1681	1184
ENSMUSG00000016624	Phf21b	40	48	19	22	89	53	81	80	40	436	25	484	138	1162	139	811	36	579	16	478	80	1350	83	1652	17	689	26	463	251	1615	140	905
ENSMUSG00000016626	Nlrp14	0	0	0	0	0	0	0	0	0	0	0	0	0	0	0	0	0	0	0	0	0	0	0	0	0	0	0	0	0	0	0	0
ENSMUSG00000016637	Ift27	132	165	141	274	50	136	24	132	77	208	91	202	38	178	43	236	75	187	83	216	29	146	60	193	102	171	99	209	68	208	43	181
ENSMUSG00000016664	Pacsin2	1618	1340	1697	1675	1809	1134	1891	1082	1570	727	1467	906	960	1572	975	1783	1341	1321	1148	1153	1054	683	880	623	1659	1321	1607	1267	1214	848	1001	1605
ENSMUSG00000016756	Cmah	16	493	5	4	0	9	15	9	73	11	111	61	5	350	4	180	0	49	0	187	9	13	12	34	13	23	19	35	22	82	5	214
ENSMUSG00000016757	Ttll12	617	283	822	526	211	295	220	274	1488	685	1502	363	246	635	344	962	1526	736	1534	544	385	357	382	449	1797	665	1737	611	525	611	237	798
ENSMUSG00000016758	Bik	130	7	157	4	113	20	286	17	19	0	14	0	92	45	57	44	11	5	10	9	83	11	68	19	73	9	36	2	122	21	148	44
ENSMUSG00000016763	Scube1	677	347	27	299	106	4303	20	3101	15	3663	12	4409	34	6230	22	4576	0	7288	4	5031	54	6901	53	12704	17	6366	7	6803	755	11260	51	5684
ENSMUSG00000016831	Tox4	1206	1279	1355	1398	1427	2600	1101	2069	1350	654	1418	886	864	1000	993	1054	1218	1048	1108	1039	1404	1169	1018	1022	1345	1171	1227	1058	1189	1000	887	1071
ENSMUSG00000016833	Mrps18c	317	95	325	229	119	92	110	96	571	270	579	162	154	168	139	217	383	164	372	140	176	71	139	121	363	166	347	158	169	99	203	152
ENSMUSG00000016918	Sulf1	887	2642	880	2336	472	2048	329	2159	660	540	717	1098	100	1808	107	1885	185	964	188	1391	156	2798	169	3429	458	801	433	1041	561	2588	131	2256
ENSMUSG00000016921	Srsf6	5526	5206	5289	4066	7933	8120	7529	7982	6390	3383	6185	2930	5567	4618	5446	5257	6518	4753	6481	4682	6386	5678	5339	4474	5927	5045	5847	4409	4952	4018	5402	4440
ENSMUSG00000016933	Plcg1	1452	2481	1481	2537	2320	2412	3091	2765	1101	1090	946	846	1317	1308	2145	1426	1331	1566	1163	1476	1693	2452	1953	2517	1121	1583	1252	1784	3455	2371	3138	1591
ENSMUSG00000016940	Kctd2	477	318	509	427	208	196	191	214	298	498	238	282	233	258	323	403	355	354	332	337	184	227	251	347	236	329	290	302	303	343	296	350
ENSMUSG00000016942	Tmprss6	11	14	19	39	106	24	143	60	2	0	14	21	183	12	249	15	8	26	7	31	694	44	569	16	0	23	0	23	324	24	288	24
ENSMUSG00000016946	Kctd5	448	318	613	378	399	494	405	350	834	218	824	182	403	364	458	428	707	347	727	283	552	276	558	347	757	309	771	334	511	339	448	313
ENSMUSG00000016982	Pom121l2	0	0	3	0	0	9	10	5	0	0	0	0	0	0	0	2	3	0	4	0	0	0	0	0	3	0	0	0	0	0	0	0
ENSMUSG00000016984	Etaa1	446	315	497	479	192	178	220	259	482	63	435	101	92	143	110	171	391	218	464	224	136	150	154	210	388	229	320	178	139	124	85	134
ENSMUSG00000016995	Matn4	152	295	59	216	511	55	977	162	11	187	3	323	88	246	160	160	29	199	22	206	170	425	405	400	28	345	61	377	129	129	39	228
ENSMUSG00000016998	Svs4	0	0	0	0	0	0	0	2	0	0	0	0	0	0	0	2	0	0	0	0	0	0	0	4	0	0	0	0	0	0	5	2
ENSMUSG00000017000	Svs6	0	0	0	0	4	0	5	0	0	0	0	0	0	0	0	2	0	5	0	0	0	4	0	2	0	4	0	7	0	4	0	2
ENSMUSG00000017002	Slpi	402	43	205	18	159	15	167	17	46	73	5	31	1346	910	575	742	16	36	16	34	952	69	663	119	24	37	78	112	497	48	718	523
ENSMUSG00000017003	Svs3a	0	0	0	0	10	0	5	0	0	0	0	0	0	0	0	0	0	0	0	4	0	0	0	0	0	5	0	0	0	0	0	0
ENSMUSG00000017004	Svs5	0	0	0	0	10	0	5	0	0	11	0	21	0	0	0	0	0	0	0	0	0	0	0	4	0	0	0	2	3	0	0	0
ENSMUSG00000017007	Rbpjl	172	200	105	47	531	83	886	251	8	146	5	141	179	182	220	118	57	193	31	160	199	401	416	398	45	243	66	334	176	117	110	107
ENSMUSG00000017009	Sdc4	6380	3626	7672	2989	13817	3084	11539	2483	3670	3486	3679	4128	4632	8620	3365	6494	3454	3599	3531	4571	4515	4416	3584	3531	4179	3641	3872	3894	1870	3097	2408	6410
ENSMUSG00000017049	Ccdc70	0	0	0	0	0	0	0	0	0	0	0	0	0	0	0	0	0	0	0	0	0	0	0	0	0	0	0	0	0	0	0	0
ENSMUSG00000017057	Il13ra1	2178	510	2182	843	2573	413	2053	293	1056	592	910	292	2484	1863	1809	1296	881	435	887	658	3584	708	2256	485	676	586	687	601	1636	1006	1783	1374
ENSMUSG00000017064	Prl5a1	0	0	0	0	0	0	0	0	0	0	0	0	0	0	0	0	0	0	0	0	0	0	0	0	0	0	0	0	0	0	0	0
ENSMUSG00000017119	Nbr1	3254	2353	3574	3072	1644	2655	1801	2689	1908	1370	2024	1369	1658	2064	2372	2152	1819	2182	1770	1895	2047	2470	2271	2444	1873	2356	1940	2472	2817	2275	2289	2084
ENSMUSG00000017132	Cyth1	567	442	656	528	673	444	701	473	958	405	817	292	831	311	791	292	1002	408	1007	349	688	548	865	551	867	353	954	447	579	423	697	413
ENSMUSG00000017144	Rnd3	3991	4453	3308	2593	7752	2835	7167	2698	2942	3331	2687	5275	7207	5984	5843	4096	2951	2180	2559	5037	5251	3031	4766	1957	7725	6151	5539	5895	3426	2423	3586	3660
ENSMUSG00000017146	Brca1	209	29	251	64	389	58	281	57	734	73	697	51	71	49	61	78	614	7	651	16	102	25	139	14	721	78	689	76	57	11	30	40
ENSMUSG00000017165	Gast	3	6	0	0	14	0	10	9	2	11	0	0	5	4	0	4	3	0	0	9	3	0	4	0	3	5	5	7	5	8	0	6
ENSMUSG00000017167	Cntnap1	367	142	319	227	221	560	215	792	219	218	205	81	150	520	195	607	237	153	329	130	139	316	244	396	197	121	244	146	249	358	157	511
ENSMUSG00000017176	Nt5c3b	363	422	451	630	290	472	186	392	484	478	409	464	84	588	89	677	519	531	638	450	91	395	116	553	416	476	418	466	186	561	77	592
ENSMUSG00000017188	Coa3	196	90	333	192	126	55	167	78	562	301	615	202	237	120	245	206	478	136	488	152	216	60	266	117	403	171	391	170	340	146	207	145
ENSMUSG00000017195	Zpbp2	7	4	13	0	14	2	15	0	2	0	3	31	9	0	8	2	3	3	0	0	6	2	12	0	3	4	3	0	8	0	17	4
ENSMUSG00000017204	Gsdma	5	2	7	0	7	5	0	10	13	0	3	0	17	0	4	0	3	0	0	4	3	0	4	0	3	5	0	0	12	0	5	0
ENSMUSG00000017210	Med24	2334	631	2577	754	1569	537	1586	463	1630	561	1735	443	1039	649	1142	813	1433	726	1510	709	1031	481	1201	702	1475	679	1571	678	1064	807	782	740
ENSMUSG00000017211	Gsdma2	0	2	0	0	0	0	0	0	0	0	0	0	0	0	0	0	0	0	0	0	6	0	0	0	0	0	0	0	0	0	5	0
ENSMUSG00000017221	Psmd3	2134	1078	2536	1281	2274	1415	2167	1120	4958	1723	5176	1088	3066	1381	3698	1620	3955	1160	3994	1103	3714	1089	3902	1190	4520	1243	4657	1361	3628	1475	3658	1437
ENSMUSG00000017264	Exosc10	1320	1220	1361	1305	1173	1801	1139	1608	1490	882	1405	816	628	1068	830	1277	1590	1185	1552	1125	736	1106	812	1139	1341	1324	1491	1344	926	1016	735	1227
ENSMUSG00000017286	Glod4	1302	483	1889	966	636	477	629	523	1926	447	2143	484	682	815	756	1032	1811	648	2089	603	827	613	764	504	2148	716	2001	707	1008	768	790	836
ENSMUSG00000017288	Vps53	1452	602	1657	812	607	563	877	556	2128	384	2339	615	1184	512	1532	589	1896	485	1911	515	1184	420	1280	427	2008	526	1871	589	1554	503	1504	540
ENSMUSG00000017291	Taok1	8079	7286	7348	7304	6540	6852	5429	7379	6744	3455	6418	3171	4624	6047	4758	5505	5254	6435	5454	5963	4974	6118	3809	4960	5681	6993	5791	6526	4303	5305	3535	6296
ENSMUSG00000017299	Dnttip1	354	256	379	320	343	475	405	289	418	374	444	242	329	307	312	356	422	270	332	261	340	251	259	236	418	327	452	310	336	269	275	275
ENSMUSG00000017300	Tnnc2	3	7	3	0	14	4	0	10	4	0	0	21	5	2	0	2	0	0	4	2	0	2	0	0	3	2	0	4	5	4	5	2
ENSMUSG00000017307	Acot8	198	152	215	185	99	171	115	204	171	104	193	121	142	135	256	176	193	178	221	142	145	132	165	151	170	152	206	144	167	129	178	129
ENSMUSG00000017309	Cd300lg	0	32	3	16	20	10	0	36	0	21	0	41	5	20	0	9	3	3	10	21	6	15	0	10	7	15	0	23	38	22	5	4
ENSMUSG00000017310	Spint4	0	0	0	0	0	0	0	0	0	0	0	0	0	0	0	0	0	0	0	0	6	0	0	0	0	0	0	0	0	0	5	0
ENSMUSG00000017311	Pyy	3	0	9	0	0	0	0	0	0	0	0	0	0	0	0	0	0	0	0	0	0	0	0	0	0	0	0	2	0	0	0	0
ENSMUSG00000017314	Mpp2	150	150	73	148	70	153	91	149	68	73	85	182	17	364	11	306	142	226	139	194	20	188	15	149	87	147	95	190	83	209	5	227
ENSMUSG00000017316	Ppy	3	0	0	0	0	0	0	0	0	0	0	0	0	0	0	0	0	0	0	0	0	0	0	2	0	0	0	0	0	0	0	0
ENSMUSG00000017344	Vtn	16	79	9	45	24	128	15	271	2	21	0	131	0	420	4	375	3	30	10	78	3	801	4	770	3	25	7	43	15	328	9	502
ENSMUSG00000017376	Nlk	534	269	455	249	346	355	329	386	404	426	400	383	300	492	422	454	311	400	292	287	332	543	333	421	337	472	368	350	361	397	309	364
ENSMUSG00000017386	Traf4	699	268	834	196	557	355	662	342	286	177	296	81	1263	313	1092	306	211	115	203	165	1172	622	1022	551	301	105	330	117	1221	424	1183	333
ENSMUSG00000017390	Aldoc	444	34	403	28	393	9	391	12	31	11	60	11	108	4	135	20	65	3	56	9	320	6	341	4	56	7	32	6	122	4	51	10
ENSMUSG00000017400	Stac2	0	49	3	94	43	191	0	138	8	32	5	31	5	57	8	51	18	46	13	69	9	164	8	163	5	47	11	40	45	139	9	71
ENSMUSG00000017404	Rpl19	9210	4934	11791	7984	7410	7997	7167	7057	10699	12440	12093	9322	6331	5898	5464	6090	12493	5468	14993	6774	6098	5316	5885	5151	10245	5914	10583	6030	5231	5262	5220	5411
ENSMUSG00000017405	Nek8	310	227	337	177	244	156	301	221	108	83	76	182	304	172	288	255	96	235	96	238	238	215	232	198	121	160	158	136	256	162	343	160
ENSMUSG00000017412	Cacnb4	95	96	41	107	96	92	72	111	20	42	29	51	17	40	0	25	21	26	22	38	20	76	23	51	13	21	34	28	57	37	26	37
ENSMUSG00000017417	Plxdc1	257	575	265	1336	103	168	248	125	71	364	98	373	25	98	71	117	347	195	307	202	66	357	135	383	157	200	147	430	235	139	136	178
ENSMUSG00000017418	Arl5b	1726	2689	1286	1359	4741	5361	3710	4364	1136	1225	1081	1068	4428	4131	3893	2361	1076	1666	856	2222	5687	4907	3622	2625	1843	1970	1986	1979	3806	2302	3607	3331
ENSMUSG00000017421	Zfp207	4501	3050	4566	3178	3964	3911	4410	3697	6795	2241	6385	2487	3697	3397	3804	3963	5352	3355	5043	3115	4365	3305	3749	3035	5834	3882	5660	3562	2904	2909	3615	3135
ENSMUSG00000017428	Psmd11	1992	1619	2084	1853	2043	1933	2043	1612	3378	1619	3395	1319	2111	2097	1805	1678	2972	1541	3049	1752	2073	1934	1688	1473	2942	1573	3156	1715	1763	1684	1740	1737
ENSMUSG00000017446	C1qtnf1	53	1335	55	1177	172	340	86	331	0	467	9	725	5	900	36	1052	16	841	16	702	23	1025	23	1262	13	613	7	716	284	1527	51	1061
ENSMUSG00000017453	Pipox	5	16	3	4	14	12	24	28	0	0	0	0	38	0	8	4	3	3	4	11	0	6	12	0	3	7	3	2	33	5	26	10
ENSMUSG00000017466	Timp2	4139	50917	5120	54859	4609	16254	2629	15406	384	17357	278	23112	67	17533	227	21519	499	32118	623	35931	451	18571	386	20489	644	24756	576	25249	3197	28819	254	23635
ENSMUSG00000017478	Zc3h18	1605	1212	1695	1227	1961	1842	1920	1569	1688	820	1742	917	1317	1057	1419	1177	1924	1133	1427	958	1538	1345	1519	1081	1678	1248	1697	1116	1439	945	1457	1133
ENSMUSG00000017485	Top2b	6261	5033	6601	6351	3941	4191	3691	4085	6621	1609	6323	1712	2227	4838	2688	4854	7152	4529	6270	4352	3502	5035	2881	5507	5899	4824	5889	4775	3574	4404	2691	4635
ENSMUSG00000017491	Rarb	222	175	199	157	53	92	81	149	28	104	47	21	13	108	25	104	26	28	25	48	32	123	4	144	70	116	74	71	40	124	22	151
ENSMUSG00000017493	Igfbp4	277	22091	475	32706	1298	11906	1648	8986	664	5572	553	8627	75	8110	160	8778	630	12937	816	13990	244	8245	236	14284	553	5961	697	6692	1451	4876	144	6612
ENSMUSG00000017499	Cdc6	80	39	63	39	225	57	239	115	467	52	462	21	187	51	146	39	311	26	289	39	156	74	184	44	367	46	292	76	153	21	161	53
ENSMUSG00000017548	Suz12	2218	1207	2028	1289	1354	1943	1077	1684	2620	561	2567	645	682	1105	876	1029	2001	1077	1924	1088	810	1087	771	915	2563	1385	2453	1342	1118	1017	596	948
ENSMUSG00000017550	Atad5	492	241	431	332	376	370	310	350	963	146	859	121	100	153	82	176	691	141	783	123	83	116	90	185	816	238	863	281	85	115	55	114
ENSMUSG00000017561	Crlf3	666	315	694	413	162	360	177	347	342	94	313	182	142	254	153	243	244	316	273	255	119	222	154	206	348	292	288	267	169	253	77	272
ENSMUSG00000017588	Krt27	0	0	0	0	0	0	0	0	0	11	0	0	25	0	25	0	3	0	0	0	0	0	4	0	0	2	3	0	0	0	0	0
ENSMUSG00000017607	Tns4	3032	197	3466	1411	613	29	1048	54	23622	3362	24072	1369	92	53	227	92	19534	120	17020	127	201	36	341	19	25099	1848	23807	1967	429	21	153	33
ENSMUSG00000017615	Tnfaip1	1702	889	1940	1215	883	737	867	656	3185	913	3119	705	1085	992	993	1291	2797	970	2807	1014	1475	743	1067	817	2885	907	2902	961	1252	917	913	981
ENSMUSG00000017631	Abr	2435	1207	2386	1938	1269	1740	1477	1599	3403	2055	3847	1802	1650	2113	1794	2388	4127	2199	3887	1461	1911	1938	1834	2336	3730	2927	3834	2468	2009	3006	1622	1891
ENSMUSG00000017639	Rab11fip4	2292	54	2346	39	561	72	681	77	794	21	939	41	229	26	249	37	478	46	528	34	301	37	341	12	971	49	954	52	399	32	267	31
ENSMUSG00000017652	Cd40	64	26	73	16	50	75	24	46	2	0	0	41	279	24	54	16	0	13	0	17	272	71	188	50	0	9	3	23	15	16	55	10
ENSMUSG00000017664	Slc35c2	308	165	391	262	80	120	167	119	422	478	384	282	246	289	238	373	440	320	411	300	269	215	274	374	339	320	378	300	272	327	207	304
ENSMUSG00000017667	Zfp334	202	560	127	882	205	952	139	905	215	332	211	252	63	520	75	693	214	713	181	611	66	718	75	628	176	602	160	576	150	652	39	514
ENSMUSG00000017670	Elmo2	800	1498	792	1626	814	1210	734	1206	851	872	926	695	270	953	351	1101	838	1524	841	1426	402	1134	390	1346	865	1255	817	1240	570	1516	326	1155
ENSMUSG00000017677	Wsb1	2584	15610	1968	4039	6497	12717	4429	12919	1730	5945	1580	8385	4283	6425	4120	6243	2014	7854	1614	10673	5679	10625	4258	7311	2781	13358	2642	11501	4308	6924	3987	8224
ENSMUSG00000017679	Ttpal	808	1108	690	807	1292	2015	996	2135	1365	965	1229	967	590	1289	656	1184	902	1204	862	1234	697	1282	618	969	1026	1208	1170	1197	790	763	554	1260
ENSMUSG00000017686	Rhot1	1421	1000	1445	1250	916	1285	820	1339	1817	903	1540	725	578	1100	887	1240	1287	1225	1338	1069	603	1210	689	1226	1589	1192	1430	1200	809	1146	723	1077
ENSMUSG00000017688	Hnf4g	5	0	3	0	24	0	48	5	0	0	0	0	13	4	4	6	0	0	0	0	6	11	0	21	0	0	3	0	5	19	0	11
ENSMUSG00000017692	Rhbdl3	378	333	337	425	73	269	39	269	8	166	5	31	13	73	4	92	6	161	4	164	20	118	19	102	7	156	24	148	17	96	0	109
ENSMUSG00000017697	Ada	130	281	189	144	169	156	191	237	204	104	187	192	1292	92	2138	113	250	141	185	132	2254	130	1482	99	128	216	152	153	2930	142	2171	116
ENSMUSG00000017707	Serinc3	3932	7662	4369	7395	6711	9943	5358	9857	2113	3995	2044	4178	7116	8690	8279	7458	2486	6456	2040	6675	9778	8101	8156	7145	2599	6429	2513	6850	10452	6921	7674	7291
ENSMUSG00000017713	Tha1	104	12	149	24	80	10	148	10	31	11	36	31	63	20	50	29	18	30	34	22	40	16	131	16	37	18	38	16	80	16	30	10
ENSMUSG00000017715	Pgs1	707	338	625	293	1117	331	1639	303	754	478	839	423	831	492	876	410	881	379	911	404	991	452	910	302	877	422	874	451	722	388	811	446
ENSMUSG00000017716	Birc5	77	19	63	39	96	12	72	25	774	83	781	21	46	55	50	46	755	11	844	19	111	41	139	12	704	60	704	55	59	19	30	46
ENSMUSG00000017718	Afmid	99	74	85	70	188	116	220	190	99	52	111	41	67	73	64	90	96	84	123	101	63	116	60	72	94	49	145	48	122	54	102	93
ENSMUSG00000017720	Trp53tg5	20	27	17	18	20	35	24	28	17	0	7	11	0	10	8	8	18	13	13	22	9	25	4	23	5	13	9	21	5	4	5	6
ENSMUSG00000017721	Pigt	5783	1244	6875	1431	2484	684	2382	554	2677	1349	2958	1148	2007	1164	2121	1539	2620	1275	2761	1298	2143	974	2155	1641	2616	1235	2704	1139	1728	1576	1880	1392
ENSMUSG00000017723	Wfdc2	8929	132	12955	80	5532	123	4143	43	1634	177	1868	81	4989	34	3574	62	1040	5	1129	11	4108	67	4198	8	1854	26	1705	16	2714	63	3142	29
ENSMUSG00000017724	Etv4	159	27	151	33	83	20	43	47	177	125	140	71	17	36	18	30	93	40	74	22	32	20	49	21	191	37	164	40	12	27	9	33
ENSMUSG00000017733	Eppin	11	2	9	0	17	0	10	0	0	0	0	0	0	0	0	0	0	0	0	0	3	0	4	0	5	0	0	0	0	0	0	0
ENSMUSG00000017734	Dbndd2	1129	150	1675	123	597	161	586	156	253	104	240	111	92	172	100	190	232	124	231	172	97	148	105	129	240	155	278	120	118	121	51	158
ENSMUSG00000017737	Mmp9	0	6	0	4	20	106	20	284	6	11	0	21	9	45	0	97	0	0	4	2	15	85	8	33	3	36	9	7	40	81	0	86
ENSMUSG00000017740	Slc12a5	38	98	25	33	96	67	124	91	22	42	18	31	13	47	15	43	18	32	22	68	29	60	45	51	15	39	13	38	38	51	13	51
ENSMUSG00000017747	Ghdc	91	189	143	204	80	158	58	154	111	229	109	162	71	221	93	284	108	199	93	211	83	187	79	232	94	237	105	197	94	269	77	265
ENSMUSG00000017754	Pltp	841	5772	1138	8418	402	3461	258	2585	969	3787	1225	4107	192	578	195	635	1575	5685	1924	5456	153	1747	154	1576	1477	3699	1525	3209	242	1210	144	648
ENSMUSG00000017756	Slc12a7	1621	500	1755	582	1203	639	1205	554	262	229	284	172	486	424	334	551	411	168	387	149	504	330	565	342	342	221	313	235	373	388	207	415
ENSMUSG00000017760	Ctsa	1177	3805	1709	4614	972	2622	953	2334	829	2843	1107	3393	2518	2000	2688	2061	1192	3614	1436	3634	3083	2891	2772	2883	1112	3339	1029	2997	2738	2903	2158	2008
ENSMUSG00000017764	Zswim1	238	185	261	218	83	110	96	204	228	156	269	131	84	127	125	152	252	187	258	125	46	86	105	95	195	155	171	120	158	106	110	86
ENSMUSG00000017765	Slc12a4	565	1350	571	1340	910	1291	948	1334	1412	2003	1398	1833	553	2109	309	1994	1569	2065	1307	1805	352	1975	390	1678	1515	2337	1743	2374	366	2343	368	2008
ENSMUSG00000017767	Spata25	31	54	53	43	17	44	24	85	24	32	34	21	0	18	4	20	29	32	31	17	12	23	8	17	34	21	21	19	24	15	30	22
ENSMUSG00000017774	Myo1c	2852	2694	3364	3165	2498	2586	2467	2096	2851	3393	2778	2869	3490	5158	2340	6559	3051	5238	2739	4635	3576	2120	2795	2577	3260	4331	3307	4274	2496	3582	3379	5742
ENSMUSG00000017776	Crk	3012	2526	2885	3219	2198	3006	1767	2849	4126	1557	3940	1611	4254	2790	3858	2530	3213	2736	3138	2882	5217	2494	3203	2270	3902	2982	3649	2771	3600	2497	3231	2555
ENSMUSG00000017778	Cox7c	503	234	559	320	310	310	291	240	958	758	1068	594	640	572	522	556	743	331	816	347	482	409	588	425	788	391	731	387	547	405	448	417
ENSMUSG00000017781	Pitpna	2628	1973	2741	2285	1997	2827	1877	2370	4744	1598	4885	1792	2268	2226	2830	2223	4299	2634	4521	2966	2882	1824	2297	1656	4444	2544	4355	2528	3926	2027	3442	2164
ENSMUSG00000017801	Mlx	393	273	521	367	195	280	186	266	822	301	792	292	358	219	429	389	632	327	629	303	493	262	390	306	642	467	620	360	507	360	338	292
ENSMUSG00000017802	Fam134c	1122	651	1543	997	465	681	524	612	1639	581	1764	504	736	705	702	760	1528	765	1783	680	971	929	805	890	1276	782	1409	694	919	829	676	646
ENSMUSG00000017817	Jph2	11	27	17	82	409	787	234	1158	2	166	0	232	30	850	224	1129	8	128	0	224	60	490	60	411	5	155	0	125	605	929	39	990
ENSMUSG00000017830	Dhx58	134	118	263	190	66	19	67	23	48	198	34	172	362	100	323	206	11	128	19	130	550	165	737	215	62	169	47	178	153	128	191	131
ENSMUSG00000017831	Rab5a	1504	1667	1411	1134	1931	2296	1553	1758	1336	913	1267	1088	1899	1828	1638	1321	1020	1257	1077	1401	2322	1661	1519	1373	1572	1631	1338	1421	1395	1351	1694	1668
ENSMUSG00000017832	Hspb9	0	9	3	2	10	14	0	10	13	11	7	0	21	6	4	8	6	7	4	9	15	8	12	4	17	5	13	4	10	10	9	8
ENSMUSG00000017837	Nkiras2	545	268	676	312	346	285	462	251	769	353	741	202	503	313	433	414	694	209	740	236	538	323	513	353	678	309	721	264	474	413	385	319
ENSMUSG00000017843	Ppp2r5c	2894	2171	3061	2597	1644	1905	1634	1808	3329	1152	3581	1037	1488	2150	1752	2411	3542	1800	3396	1853	1787	1801	1744	1921	3421	2001	3147	1892	2224	2117	1588	2305
ENSMUSG00000017858	Ift52	881	258	992	593	445	388	381	345	705	270	768	363	408	356	433	445	740	324	703	325	371	267	509	362	630	314	765	309	490	394	359	330
ENSMUSG00000017861	Mybl2	60	14	41	35	47	15	110	33	298	52	245	0	67	36	61	29	229	21	227	19	57	32	60	21	197	25	276	43	50	26	55	26
ENSMUSG00000017868	Sgk2	0	6	0	0	10	4	29	0	2	0	0	0	30	4	22	2	0	0	0	4	34	8	19	0	0	4	3	0	10	0	34	0
ENSMUSG00000017897	Eya2	3912	133	4227	132	1766	676	2167	502	2940	104	3446	81	1679	40	2557	66	2812	55	2865	95	2058	273	2488	370	2275	34	2264	50	3642	206	3049	44
ENSMUSG00000017922	Prl3c1	0	0	0	0	0	0	0	2	0	0	0	0	0	0	0	0	0	0	0	0	0	0	0	0	0	0	0	0	0	0	0	0
ENSMUSG00000017929	B4galt5	104	2733	83	1128	2649	2385	2448	1999	31	2791	60	2457	2298	6492	1635	5125	44	3940	28	4319	1872	3930	1508	1676	261	3363	156	2734	1364	3002	1035	5145
ENSMUSG00000017943	Gdap1l1	33	24	3	20	24	27	10	23	4	0	3	11	5	2	4	13	6	11	4	12	0	13	0	8	5	13	3	11	15	18	0	4
ENSMUSG00000017950	Hnf4a	0	6	0	0	10	0	5	5	0	11	0	0	0	0	4	0	3	0	0	2	0	4	4	4	3	0	38	0	5	0	9	4
ENSMUSG00000017969	Ptgis	7	1521	25	2022	172	93	86	140	2	3455	3	2447	30	3366	39	4133	0	6920	7	5466	37	597	34	498	7	3548	11	3932	268	1105	34	3145
ENSMUSG00000017978	Cadps2	918	205	1006	140	910	40	1348	68	30	63	36	41	736	100	848	60	67	55	19	113	748	101	700	55	206	71	137	59	1214	59	862	55
ENSMUSG00000017999	Ddx27	890	523	1100	590	1150	1179	1153	938	1390	364	1269	373	540	494	635	670	1415	494	1246	389	592	645	610	462	1265	491	1248	451	631	377	587	520
ENSMUSG00000018001	Cyth3	1280	1782	1172	1566	1651	1826	1443	2077	909	1079	817	1289	1180	2294	784	1894	699	1158	758	1527	949	2763	823	1927	958	1440	876	1563	776	1871	634	2278
ENSMUSG00000018008	Cyth4	0	2	7	2	27	5	20	4	0	0	0	0	308	16	394	16	0	5	0	0	340	13	427	2	3	0	0	0	732	30	854	15
ENSMUSG00000018012	Rac3	277	27	367	63	218	42	224	51	395	166	380	61	146	51	249	78	424	28	473	34	235	30	285	44	363	58	404	71	240	91	216	67
ENSMUSG00000018040	Rrp7a	802	503	948	708	785	702	801	601	1314	654	1236	373	694	785	798	841	1243	554	1307	544	765	573	827	560	1182	565	1245	546	896	512	824	682
ENSMUSG00000018042	Cyb5r3	3342	2306	4227	4483	5980	1118	6058	1192	4192	4088	4326	4379	1778	4990	1727	5800	4576	4253	5429	4398	1470	1569	1448	2168	4641	4303	4048	4118	1503	2257	1394	4584
ENSMUSG00000018068	Ints2	1006	814	946	812	972	734	996	968	1545	841	1485	906	1650	1389	1351	1129	1410	1202	1197	1133	1665	1359	1437	1139	1333	1280	1365	1291	1205	868	1048	1200
ENSMUSG00000018076	Med13l	4887	6958	3945	4219	4972	6311	4096	5972	5836	5810	5841	5366	4503	5924	4567	4772	4638	6834	4227	6103	4292	5686	4572	4464	6869	8534	7741	8426	4272	6654	4295	6498
ENSMUSG00000018102	Hist1h2bc	437	147	597	254	518	131	681	157	1810	893	1999	564	1687	848	1333	804	1582	245	1617	379	977	290	1257	404	1640	259	1481	225	1191	316	1386	648
ENSMUSG00000018126	Baiap2l2	3	7	11	6	20	22	20	49	4	0	9	0	0	8	0	6	3	3	4	2	0	23	0	16	15	2	9	6	10	11	0	17
ENSMUSG00000018143	Mafk	1124	3090	932	979	2867	5305	2282	4488	551	1609	493	1863	3132	1990	2560	1363	678	1871	516	2510	3406	3479	2110	1848	1322	2092	1092	2107	2337	1820	2961	2343
ENSMUSG00000018160	Med1	2365	1854	2458	2202	2326	2768	1986	2596	2489	1225	2410	1007	1313	2029	1631	1867	2792	1754	2368	1630	1789	2050	1736	1982	2343	1755	2511	1714	1805	1976	1234	1976
ENSMUSG00000018166	Erbb3	3304	402	4317	514	1694	78	1762	67	1990	353	1937	242	3211	118	2603	210	1975	49	2062	140	4578	76	2978	38	2220	181	2276	192	2313	106	2745	116
ENSMUSG00000018167	Stard3	354	130	483	123	106	141	205	119	189	187	176	162	337	172	259	218	188	126	203	120	349	187	461	191	223	158	189	144	481	230	351	167
ENSMUSG00000018168	Ikzf3	1746	11	1663	8	1687	35	1505	10	0	11	0	21	532	18	788	34	3	7	4	2	790	6	1740	2	3	2	5	0	1704	30	1846	64
ENSMUSG00000018169	Mfng	3	2	3	0	47	15	91	17	0	0	0	0	17	2	11	0	0	0	4	2	9	2	0	4	0	2	3	4	57	5	0	2
ENSMUSG00000018171	Vmp1	3522	2585	2464	1212	7676	3772	9967	3043	1990	820	1873	1339	7428	3753	5279	2878	2812	1524	2034	2494	6168	4123	6341	2285	3269	2260	3458	2306	4073	3190	6035	3067
ENSMUSG00000018189	Uchl5	525	147	593	363	205	197	181	201	1548	94	1485	91	241	237	348	257	1266	166	1099	177	352	169	229	221	1271	272	1235	250	352	162	351	161
ENSMUSG00000018196	Glrx2	382	278	449	442	185	255	172	339	362	146	324	202	75	356	178	377	291	324	273	308	196	262	120	272	301	277	227	286	204	273	153	312
ENSMUSG00000018199	Trove2	2097	2097	1976	2882	890	1930	777	2103	1465	934	1394	896	345	1869	550	2075	1480	2118	1405	1741	431	1320	431	1674	1381	1750	1392	1847	975	1718	461	1654
ENSMUSG00000018209	Stk4	1118	621	1112	787	794	585	748	690	1123	322	1147	464	831	608	851	739	979	569	896	408	1008	559	752	660	1064	592	1040	555	935	548	862	567
ENSMUSG00000018211	Wfdc15b	174	2	185	0	297	2	372	4	8	0	5	0	25	12	4	6	3	0	0	2	6	2	15	6	15	0	7	2	38	7	5	0
ENSMUSG00000018217	Pmp22	622	6693	133	6690	1018	3284	581	2927	84	2791	58	3000	150	2220	181	2156	155	5614	154	7156	173	2266	203	2907	178	3958	234	3531	486	3607	72	2486
ENSMUSG00000018238	Gdf9	0	64	3	6	103	24	148	62	6	0	3	31	25	49	43	37	0	40	0	41	32	36	68	17	5	26	9	30	73	21	34	69
ENSMUSG00000018239	Zcchc10	95	85	137	117	70	148	148	85	418	94	466	51	63	120	117	150	244	111	178	100	88	78	90	87	322	111	315	119	148	76	102	87
ENSMUSG00000018259	Prl8a2	0	0	0	0	0	0	0	0	0	0	0	0	0	0	0	0	0	0	0	0	0	0	0	0	0	0	0	0	3	0	0	0
ENSMUSG00000018263	Tbx5	0	36	3	121	0	2	0	2	0	52	0	21	0	0	0	0	0	11	0	46	0	0	0	0	0	23	0	62	0	0	0	0
ENSMUSG00000018286	Psmb6	626	392	874	564	748	727	720	462	1743	1059	1755	433	848	725	770	795	1372	452	1510	517	790	506	775	504	1428	558	1525	574	736	529	651	612
ENSMUSG00000018287	Spag7	690	315	868	549	501	489	567	324	903	312	957	272	478	528	507	556	761	406	875	428	436	358	584	383	954	467	897	387	607	493	613	493
ENSMUSG00000018293	Pfn1	2784	1345	3538	1712	2573	1382	2710	1423	7693	5841	7727	3554	5259	3509	4382	3488	6605	2642	8208	2405	5155	2129	4564	2493	6795	2649	6467	2682	4568	2759	4658	3101
ENSMUSG00000018322	Tomm34	725	699	700	574	1025	1320	1043	1200	504	758	475	665	495	563	493	669	522	676	491	679	586	618	633	621	422	822	422	709	725	578	583	574
ENSMUSG00000018326	Ywhab	4055	3028	4357	4783	2689	3183	1939	2532	6101	2905	5524	2769	3162	4541	3166	4318	4720	4655	4899	4416	3618	3089	2514	3230	5044	4374	5041	4247	3368	4127	2488	4299
ENSMUSG00000018334	Ksr1	455	3112	383	2339	462	2225	243	1881	100	5489	74	5144	707	1482	472	2047	188	7309	142	4393	841	2257	618	2212	96	9325	97	8092	446	3421	351	2254
ENSMUSG00000018339	Gpx3	51	1704	57	1839	442	969	205	976	179	19256	98	19730	287	4200	855	5422	784	4391	83	5813	301	2382	259	1999	87	12919	250	14164	3555	8080	1255	5256
ENSMUSG00000018340	Anxa6	1252	2632	1244	3126	2422	2356	2258	2370	1610	3403	1820	4208	3240	5968	3978	7043	1184	4531	1010	4739	3420	3621	3304	4263	1572	4752	1544	4681	5039	7631	3548	6198
ENSMUSG00000018341	Il12rb2	240	120	169	78	297	171	201	358	155	146	111	172	108	209	82	66	129	65	175	73	91	197	90	114	102	92	181	125	78	59	39	124
ENSMUSG00000018347	Zkscan6	159	90	181	159	238	156	262	115	128	115	127	81	270	127	234	125	85	115	135	101	218	102	232	91	166	108	154	125	293	98	283	116
ENSMUSG00000018362	Kpna2	424	434	507	225	811	937	696	1027	3316	737	2802	353	536	850	422	711	3103	690	3264	534	736	895	476	594	2167	640	2530	620	626	496	330	804
ENSMUSG00000018363	Smurf2	2246	2556	1974	2330	2913	2587	3343	2575	1648	1463	1746	1611	1658	2814	1670	2544	1644	2297	1451	2299	1719	2963	1527	2202	1856	2451	1871	2388	1934	2300	1542	2931
ENSMUSG00000018372	Cep95	510	343	465	322	478	320	534	531	228	146	213	252	233	246	273	338	257	289	175	243	252	381	367	427	223	356	198	324	303	241	313	279
ENSMUSG00000018377	Vezf1	3840	4774	3658	4298	2165	4904	1577	4184	3182	2314	3579	2185	690	3522	834	3182	2751	3980	2387	3945	1000	4160	928	3893	3616	4763	3502	4592	1599	3385	727	3512
ENSMUSG00000018378	Cuedc1	1342	693	1176	758	808	775	862	821	942	965	1134	906	366	781	422	1112	1197	1200	1102	1086	306	690	506	968	1316	1086	1245	1142	631	719	634	898
ENSMUSG00000018379	Srsf1	4035	2986	4343	3613	3357	4494	2924	4538	10004	1858	9007	1611	1928	3048	2471	3269	8061	3545	8438	3297	2735	3158	2660	2717	8170	3829	8175	3557	2885	2508	2471	2564
ENSMUSG00000018381	Abi3	319	130	369	221	76	101	39	85	983	623	1110	252	9	123	11	132	1392	170	1411	197	3	158	12	132	1038	311	1067	259	64	168	0	129
ENSMUSG00000018387	Shroom1	14	71	17	132	63	62	120	60	39	63	38	41	50	40	57	57	39	69	28	49	83	41	113	82	64	54	36	31	113	96	93	58
ENSMUSG00000018395	Kif3a	483	552	477	686	389	767	320	732	260	135	318	252	125	492	195	633	321	381	316	425	162	729	188	711	267	404	263	286	282	515	98	554
ENSMUSG00000018398	Sept8	1017	2007	930	2622	679	2357	615	2004	1381	1453	1280	1631	682	1937	795	2377	1821	2584	1697	2604	906	2717	902	3009	1386	1906	1411	1845	964	3022	609	2336
ENSMUSG00000018401	Mtmr4	1041	904	1108	1202	1654	3579	1205	2399	1258	571	1283	504	412	899	476	1312	1318	903	1350	812	620	1299	539	939	1229	854	1426	815	884	735	562	954
ENSMUSG00000018405	Mrm1	154	121	203	163	80	63	67	101	153	166	171	202	84	102	61	146	183	189	243	174	60	86	98	142	200	165	175	161	106	139	85	109
ENSMUSG00000018411	Mapt	523	182	181	68	126	121	139	187	35	63	12	11	25	41	39	59	21	36	22	44	54	137	49	106	24	66	34	67	50	41	17	42
ENSMUSG00000018412	Kansl1	3155	2600	3254	2702	2376	3209	2472	3080	1626	1577	1660	1631	1620	2374	1645	2548	1883	2278	1945	2134	2095	3214	1901	3196	1905	2869	1940	2828	2100	3386	1609	2567
ENSMUSG00000018415	Gid4	1654	1145	1781	1489	1490	1935	1662	1807	1312	758	1285	574	474	805	550	851	1608	799	1546	862	428	790	607	1079	1627	928	1443	961	743	896	533	684
ENSMUSG00000018417	Myo1b	738	137	792	334	2620	790	3210	1763	1438	52	1110	101	2082	1166	1684	969	856	53	915	122	3326	3014	2507	2329	968	100	1084	187	1460	1196	1609	1048
ENSMUSG00000018425	Dhx40	1149	1314	1331	1434	1661	3238	1381	2392	694	685	704	816	952	1474	1248	1175	763	1083	620	1325	1679	1826	1104	1642	651	1493	679	1527	1599	1301	1424	1348
ENSMUSG00000018427	Ypel2	593	343	569	307	962	777	1205	963	53	322	52	494	3178	2361	3326	2602	54	370	62	320	3123	818	2114	726	123	467	112	386	2131	992	2353	2072
ENSMUSG00000018428	Akap1	813	740	1006	812	682	1798	605	1981	1065	581	1061	796	279	969	376	945	1228	862	1270	830	363	1138	386	1116	1148	972	1111	829	598	887	338	883
ENSMUSG00000018433	Nol11	808	573	970	857	676	1032	577	828	1685	281	1556	242	329	608	369	749	1577	669	1577	591	391	694	431	651	1403	679	1468	570	523	645	359	652
ENSMUSG00000018442	Derl2	670	347	830	572	416	368	486	336	1003	301	977	333	528	639	653	725	981	673	936	579	572	437	614	602	805	621	813	618	617	606	511	449
ENSMUSG00000018446	C1qbp	1124	449	1178	787	669	682	620	603	2439	696	2285	615	432	613	483	589	2147	479	2402	515	552	481	573	479	2000	530	2159	435	626	407	495	433
ENSMUSG00000018449	Rpain	178	335	151	171	267	441	181	467	50	187	56	151	96	174	100	233	60	164	50	270	77	281	87	253	81	261	68	230	134	222	81	185
ENSMUSG00000018451	6330403K07Rik	130	163	9	229	70	732	24	724	6	0	0	0	9	30	0	9	6	32	4	96	3	57	0	99	5	13	3	16	12	62	0	15
ENSMUSG00000018459	Slc13a3	7	2	0	2	10	2	0	4	0	0	3	0	5	53	4	62	0	0	4	7	0	55	8	16	0	10	0	0	5	41	5	20
ENSMUSG00000018470	Kcnab3	7	19	9	14	7	9	10	17	8	11	12	21	0	22	8	23	6	19	4	19	0	15	15	50	3	18	11	23	22	21	9	28
ENSMUSG00000018474	Chd3	6220	2971	5822	3568	4655	3948	4891	3922	5654	2719	6396	3544	6613	5742	8612	5872	5229	5104	4614	3980	7261	4311	9001	5414	5939	4051	5627	4101	9365	8292	9063	6775
ENSMUSG00000018476	Kdm6b	4169	13496	2432	3147	9979	15200	8639	15053	1588	5561	1547	5809	6402	5291	5407	4355	1839	6665	1546	8994	6599	10202	6655	6824	2714	6585	2518	6603	5257	5231	6436	8543
ENSMUSG00000018479	1700125H20Rik	0	4	0	0	24	4	24	7	0	0	0	11	13	0	11	6	0	5	7	4	9	8	15	14	3	5	5	4	10	7	9	4
ENSMUSG00000018481	Appbp2	2334	2388	2380	1898	2758	3049	2367	2969	3312	1131	3017	1460	2098	2464	2142	2266	2401	1741	2335	1752	2766	2443	1935	1893	2968	2199	2606	1979	2234	1861	1728	2352
ENSMUSG00000018486	Wnt9b	3	2	0	4	17	2	29	2	0	11	3	11	5	22	15	37	0	3	4	2	15	0	4	0	5	9	0	14	10	33	30	37
ENSMUSG00000018500	Adora2b	152	53	187	32	60	20	86	47	197	32	218	21	17	77	15	85	129	19	135	38	32	146	38	82	149	18	221	24	57	81	22	134
ENSMUSG00000018501	Ncor1	8474	5915	7144	6223	10984	7127	12672	7811	5563	3538	5833	3121	4599	5402	5226	5489	5740	5572	5181	5073	4773	5307	5320	5296	5474	5570	5465	5756	6187	4732	5414	5570
ENSMUSG00000018507	Trpv2	53	85	11	43	172	178	191	302	4	104	9	51	17	157	32	104	3	49	13	61	23	313	30	187	9	34	9	38	127	129	30	154
ENSMUSG00000018509	Cenpv	139	100	123	119	182	186	186	149	386	52	349	31	46	47	75	44	324	65	421	95	63	83	38	123	303	91	343	76	83	82	34	22
ENSMUSG00000018537	Pcgf2	738	646	706	801	422	431	562	496	424	384	402	302	216	360	359	426	414	569	393	468	235	490	285	579	445	456	481	389	345	492	313	317
ENSMUSG00000018541	Cwc25	543	775	557	865	686	992	634	800	471	322	446	282	403	395	341	547	401	630	390	517	462	566	397	540	488	566	376	529	582	430	393	587
ENSMUSG00000018543	1700001P01Rik	14	27	5	6	17	45	43	80	11	0	7	21	5	6	8	6	3	15	0	27	12	37	0	6	9	15	13	21	19	13	9	19
ENSMUSG00000018547	Pip4k2b	964	1296	1036	1816	458	797	358	782	920	447	952	675	250	729	351	1083	1071	1357	997	1079	286	732	300	851	884	841	907	754	427	921	313	925
ENSMUSG00000018548	Trim37	1070	547	880	725	1061	729	1039	784	1025	270	994	302	291	492	405	602	961	498	872	504	346	467	423	494	943	484	889	481	561	435	359	442
ENSMUSG00000018554	Ybx2	7	7	27	6	37	15	48	41	15	0	3	11	5	4	8	4	16	5	19	0	12	23	15	21	11	4	24	6	3	8	0	8
ENSMUSG00000018559	Ctdnep1	918	1034	1002	1122	765	1161	843	999	1125	1162	1130	977	736	949	780	1140	1094	1020	1043	1012	903	881	865	949	1142	1038	1132	1050	1022	1212	832	881
ENSMUSG00000018565	Elp5	637	617	615	537	808	936	715	738	863	613	930	464	482	516	564	697	761	577	924	552	643	495	565	555	886	602	807	545	774	562	621	498
ENSMUSG00000018566	Slc2a4	126	26	195	63	30	70	15	161	31	32	27	0	150	75	61	41	60	7	105	4	230	162	150	129	28	9	34	24	195	77	39	51
ENSMUSG00000018567	Gabarap	1577	2331	2052	3213	1569	2521	1301	2383	1541	4513	1536	4510	1708	2894	1872	3158	1526	2939	1746	3434	2225	2517	1920	2775	1572	3400	1443	3199	2283	3002	1952	2692
ENSMUSG00000018569	Cldn7	1037	36	1699	24	3252	116	2524	68	375	32	606	51	9363	30	7204	176	198	17	93	22	10423	127	7119	23	746	13	595	9	5627	157	7433	26
ENSMUSG00000018570	2810408A11Rik	33	34	41	12	37	22	34	22	17	11	16	0	46	6	18	23	29	5	22	11	29	46	38	42	15	5	28	6	17	35	9	35
ENSMUSG00000018572	Phf23	589	842	730	648	669	666	615	810	822	644	908	494	590	524	554	776	822	759	881	722	606	857	539	792	831	653	769	584	643	747	516	684
ENSMUSG00000018574	Acadvl	589	814	850	702	610	724	853	847	823	644	832	574	565	881	756	918	899	958	924	914	657	695	524	713	786	882	794	837	910	805	820	744
ENSMUSG00000018581	Dnah11	409	16	269	39	870	19	1643	26	242	11	218	21	25	30	50	37	373	5	255	11	49	27	34	36	473	18	305	9	209	32	60	28
ENSMUSG00000018583	G3bp1	3978	2057	3913	2326	4138	3453	3429	3629	6397	2055	6403	1833	4038	2999	4177	2799	6307	2475	5972	2175	5399	2900	4213	2100	5914	2044	5927	2124	3848	1795	3721	2497
ENSMUSG00000018585	Atox1	426	180	660	241	254	101	301	102	932	924	1121	574	432	391	490	456	850	297	1108	315	439	234	401	261	871	341	907	368	432	314	402	417
ENSMUSG00000018589	Glra2	0	0	0	0	0	0	0	0	0	0	0	0	0	0	0	0	0	0	0	0	0	0	0	0	0	0	0	0	0	0	0	0
ENSMUSG00000018593	Sparc	1070	23206	1234	21591	959	3246	481	2990	5385	20615	5551	28457	250	39617	493	41744	5370	25276	6040	23840	867	29795	1239	53239	5325	16877	4873	17647	4591	28574	520	34009
ENSMUSG00000018595	Glra4	18	0	7	0	10	10	0	20	10	0	5	11	5	4	4	4	16	3	7	4	0	11	4	4	0	4	7	4	0	4	0	0
ENSMUSG00000018599	Mief2	88	63	81	70	83	32	72	73	93	52	78	81	63	69	96	83	72	101	71	93	32	51	87	63	70	68	70	98	78	90	64	75
ENSMUSG00000018604	Tbx3	1331	4772	1098	5231	1532	10632	815	7963	566	4296	695	3332	25	3429	68	2542	673	4396	396	4384	119	6378	113	6617	1180	3742	901	3610	996	5181	39	3134
ENSMUSG00000018620	Mmp20	0	0	0	0	4	0	0	0	0	0	0	0	9	2	11	2	0	3	0	0	6	0	12	0	0	0	0	0	3	0	26	0
ENSMUSG00000018623	Mmp7	14	0	11	0	33	0	15	0	2	0	0	0	939	10	1752	34	0	0	0	0	1453	6	2260	2	3	2	7	0	1437	26	3299	10
ENSMUSG00000018634	Crhr1	0	0	0	0	0	0	5	0	0	0	3	0	0	4	0	0	6	0	7	0	0	0	0	0	0	0	0	0	0	0	0	0
ENSMUSG00000018648	Dusp14	339	79	341	95	248	226	167	206	335	166	413	121	665	613	507	324	393	122	381	123	867	355	539	370	528	218	567	309	549	496	592	483
ENSMUSG00000018651	Tada2a	431	301	425	363	445	214	686	276	526	229	506	101	92	272	160	336	386	324	384	226	156	262	165	325	439	266	380	279	326	330	178	243
ENSMUSG00000018654	Ikzf1	5	2	3	6	50	0	58	4	2	0	3	31	21	10	78	20	3	7	0	0	32	9	72	2	0	9	0	4	247	15	102	11
ENSMUSG00000018656	Tcaf3	5	9	0	2	17	5	0	10	2	11	0	11	5	14	4	2	0	11	0	7	0	29	4	2	3	2	0	0	0	0	0	10
ENSMUSG00000018659	Pnpo	301	48	383	76	175	60	248	38	217	104	191	31	133	84	156	127	170	74	160	73	233	50	203	57	210	46	185	57	216	49	207	116
ENSMUSG00000018661	Cog1	1116	799	1236	1024	646	854	801	719	894	779	1072	927	719	785	784	1027	1010	1085	988	867	881	941	838	1043	1121	944	1145	1002	1043	1053	875	956
ENSMUSG00000018666	Cbx1	1179	809	1313	1047	906	838	667	1095	1299	415	1434	474	657	840	706	908	1248	715	1151	674	785	785	741	941	1240	648	1269	600	776	763	528	746
ENSMUSG00000018669	Cdk5rap3	670	352	790	479	320	265	520	263	411	488	453	494	432	532	628	781	437	490	451	445	465	325	621	528	502	493	506	543	614	488	617	654
ENSMUSG00000018672	Copz2	150	367	175	499	86	146	86	166	44	457	63	373	0	317	15	419	65	444	40	391	20	227	15	406	64	341	40	324	54	402	13	384
ENSMUSG00000018677	Slc25a39	837	429	1042	551	617	553	672	439	1899	1453	1970	1279	686	1513	809	1468	2001	1010	2203	881	886	764	913	1084	1786	1158	1842	1228	1179	1571	837	1238
ENSMUSG00000018678	Sp2	404	511	383	456	557	881	443	645	422	239	389	172	316	327	266	268	381	329	458	327	320	339	285	398	441	296	401	273	298	386	288	370
ENSMUSG00000018697	Aatf	655	214	646	371	383	464	362	423	920	146	888	151	250	321	288	378	825	253	875	276	250	315	390	291	884	280	750	314	385	289	338	308
ENSMUSG00000018698	Lhx1	7	2	3	0	0	4	5	0	0	0	0	0	0	6	0	0	6	0	4	4	0	4	0	4	7	0	5	0	0	0	0	2
ENSMUSG00000018707	Dync1h1	23174	14042	22660	14923	17678	14581	17339	15040	12979	11298	13098	11617	13322	16372	14514	15804	19314	16132	19557	13128	15832	17355	16831	14940	13172	13550	15876	15503	15099	16674	11744	16860
ENSMUSG00000018727	Cpsf4l	29	7	19	18	126	9	139	23	8	32	5	11	17	8	25	22	16	17	7	24	12	6	27	14	5	5	7	12	26	10	22	8
ENSMUSG00000018733	Pex12	233	150	283	202	93	158	115	179	226	52	258	51	125	110	114	145	191	153	261	176	77	125	105	144	214	142	200	132	167	131	77	138
ENSMUSG00000018736	Ndel1	1719	2323	1537	1603	5153	2711	5977	2605	1225	1391	1176	1984	3270	2203	3127	1776	1313	2072	1141	2405	3341	2208	2866	1680	1528	2094	1628	2061	2330	1558	3020	2106
ENSMUSG00000018740	Slc25a35	404	120	439	200	89	65	134	86	464	198	542	242	71	239	107	210	429	283	510	243	66	90	68	174	443	269	439	199	118	278	157	176
ENSMUSG00000018750	Zbtb4	1632	2151	1631	2936	992	2387	858	2257	515	1360	469	1430	233	1000	422	1287	722	2260	553	2252	363	990	431	1282	572	1901	580	1987	849	1637	482	1185
ENSMUSG00000018752	Tnfsfm13	77	1202	73	1634	290	775	267	637	11	364	7	464	275	377	355	405	8	671	13	650	289	622	217	623	9	539	7	611	347	625	250	422
ENSMUSG00000018761	Mpdu1	350	184	343	237	317	174	405	196	609	312	542	323	474	272	387	292	386	201	568	182	502	223	479	283	464	197	467	232	462	336	511	265
ENSMUSG00000018765	Fxr2	1105	992	1274	1105	1117	1372	1239	1127	1123	924	1054	856	732	1156	965	1143	1141	1050	1154	990	920	1150	1022	1169	1288	1099	1237	1157	1114	1394	1044	1147
ENSMUSG00000018770	Atp5g3	1515	605	2018	1095	916	826	862	614	3961	1183	3807	917	1209	1363	1465	1533	2948	987	3138	960	1676	895	1134	770	3398	1105	3317	1091	1620	1009	1508	1412
ENSMUSG00000018774	Cd68	121	236	79	70	452	363	472	734	100	166	85	121	549	127	596	182	85	63	59	133	558	255	562	170	73	137	99	149	373	99	427	127
ENSMUSG00000018776	Slc35g3	5	22	3	8	40	20	39	49	2	0	0	0	34	0	15	13	3	9	4	11	3	8	19	4	3	7	7	11	5	8	13	2
ENSMUSG00000018796	Acsl1	2290	374	2745	396	300	424	396	426	807	550	810	363	100	327	171	234	632	341	835	303	117	278	105	204	702	361	737	447	139	264	123	290
ENSMUSG00000018800	Abca5	1160	1580	1006	1952	1028	2763	724	2715	211	830	193	685	125	1256	139	920	270	1386	261	1470	224	1513	188	1716	284	1443	273	1400	422	1593	123	1153
[truncated: 47,672 more rows]
