# Supplementary material
Source: Research Square preprint supplement (doi:10.21203/rs.3.rs-9812305/v1)

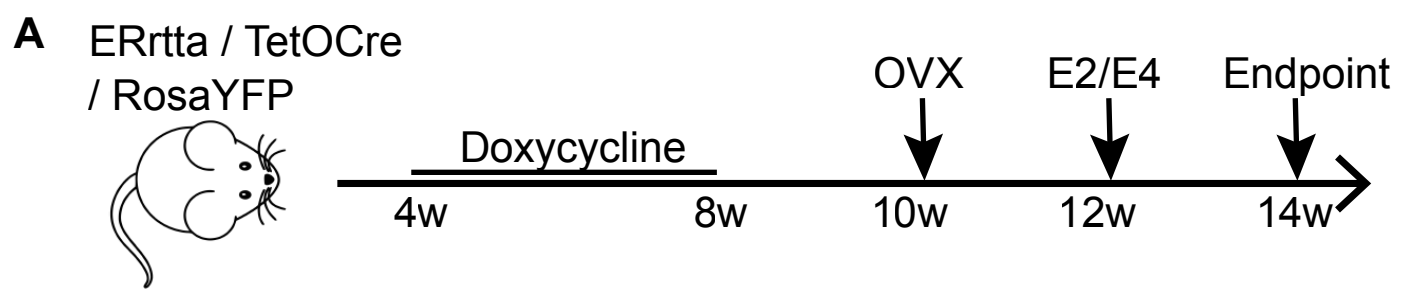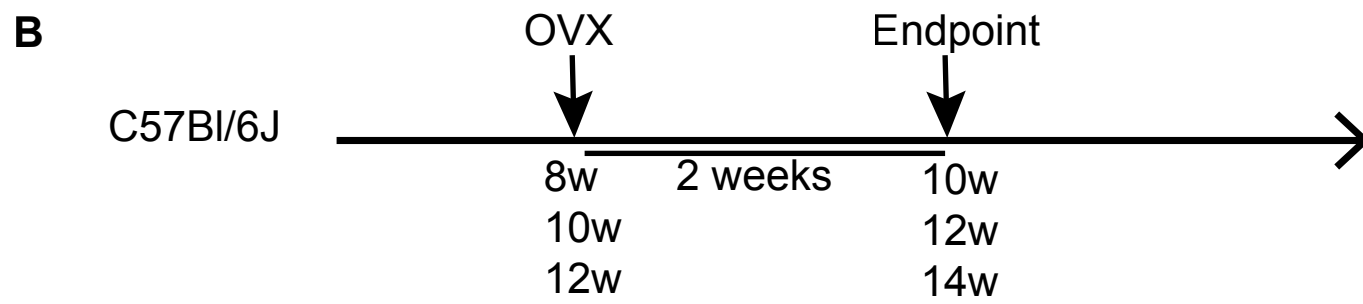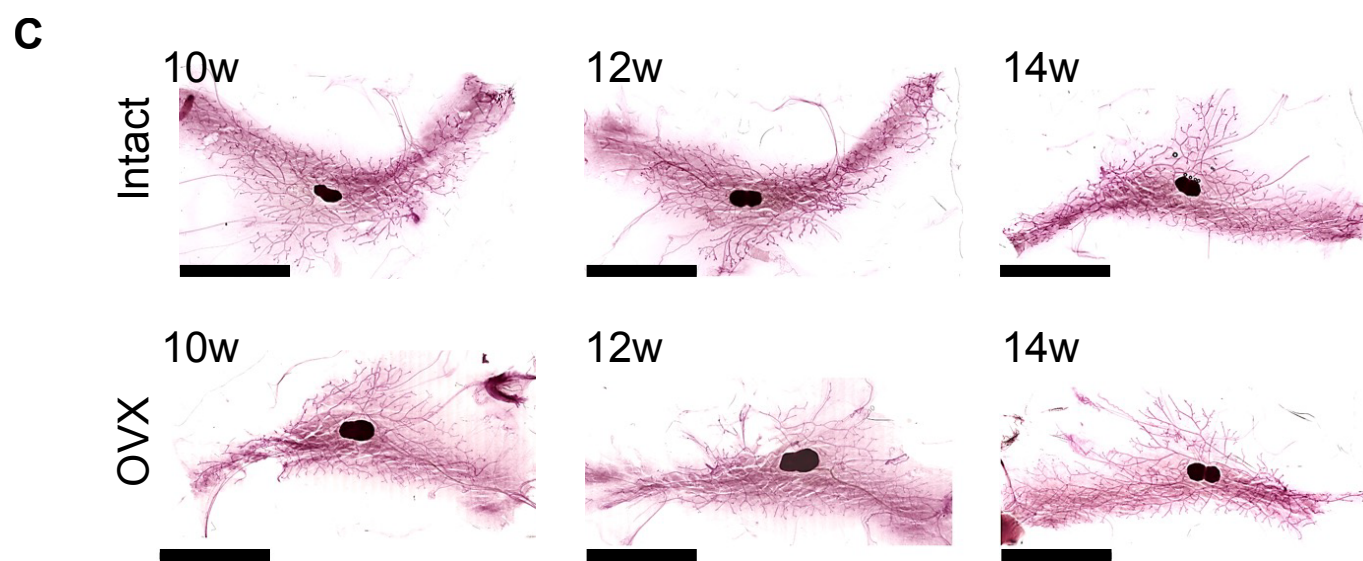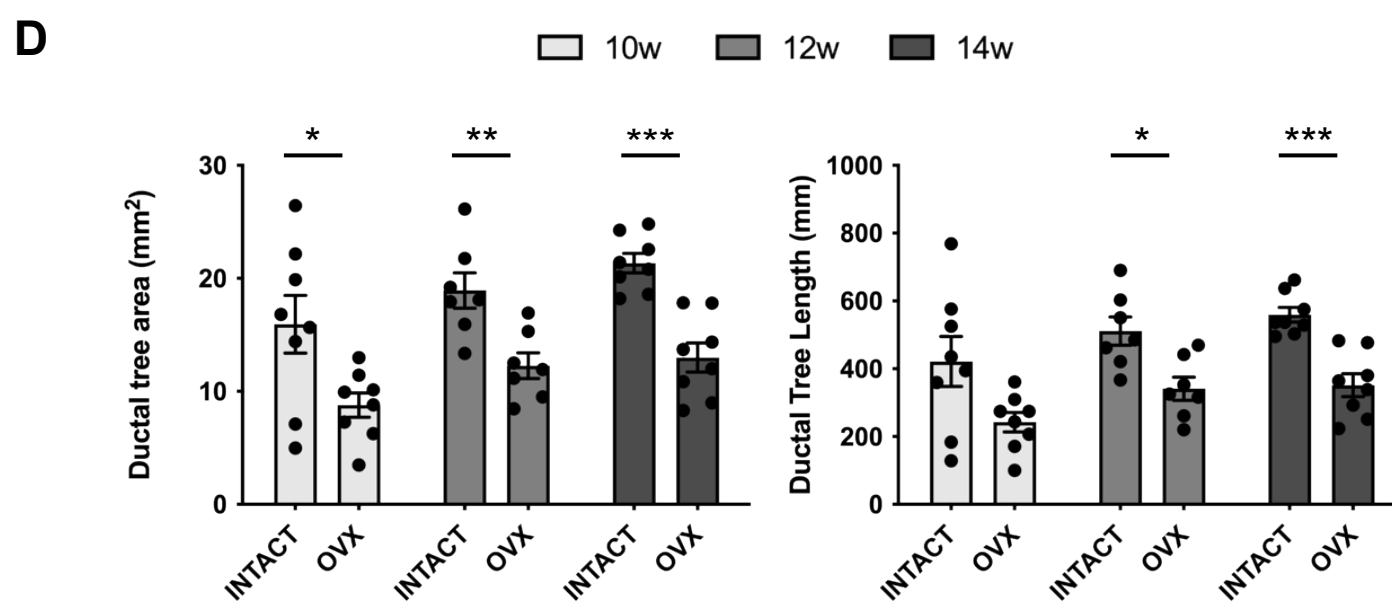

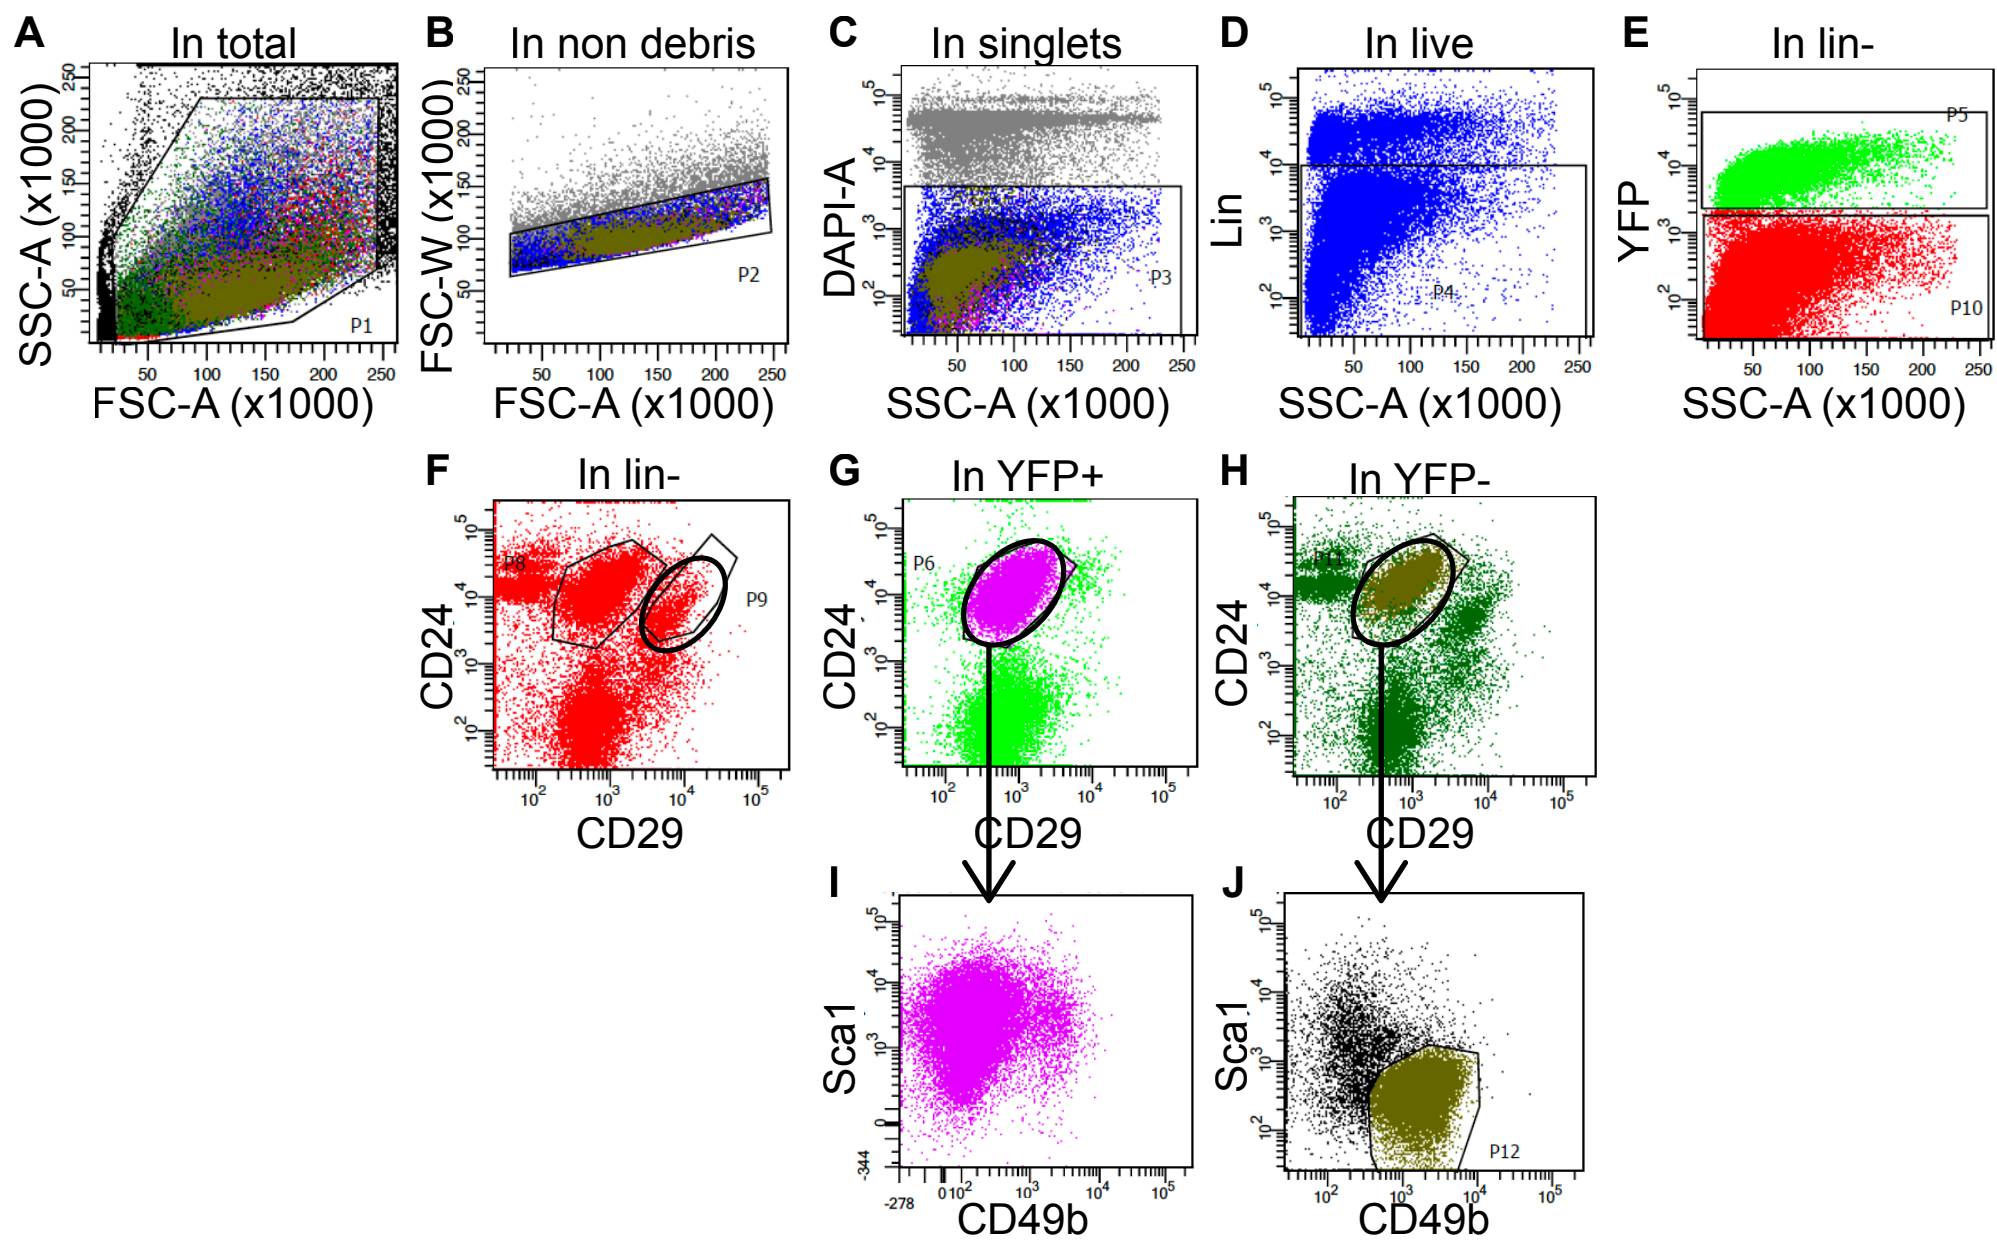

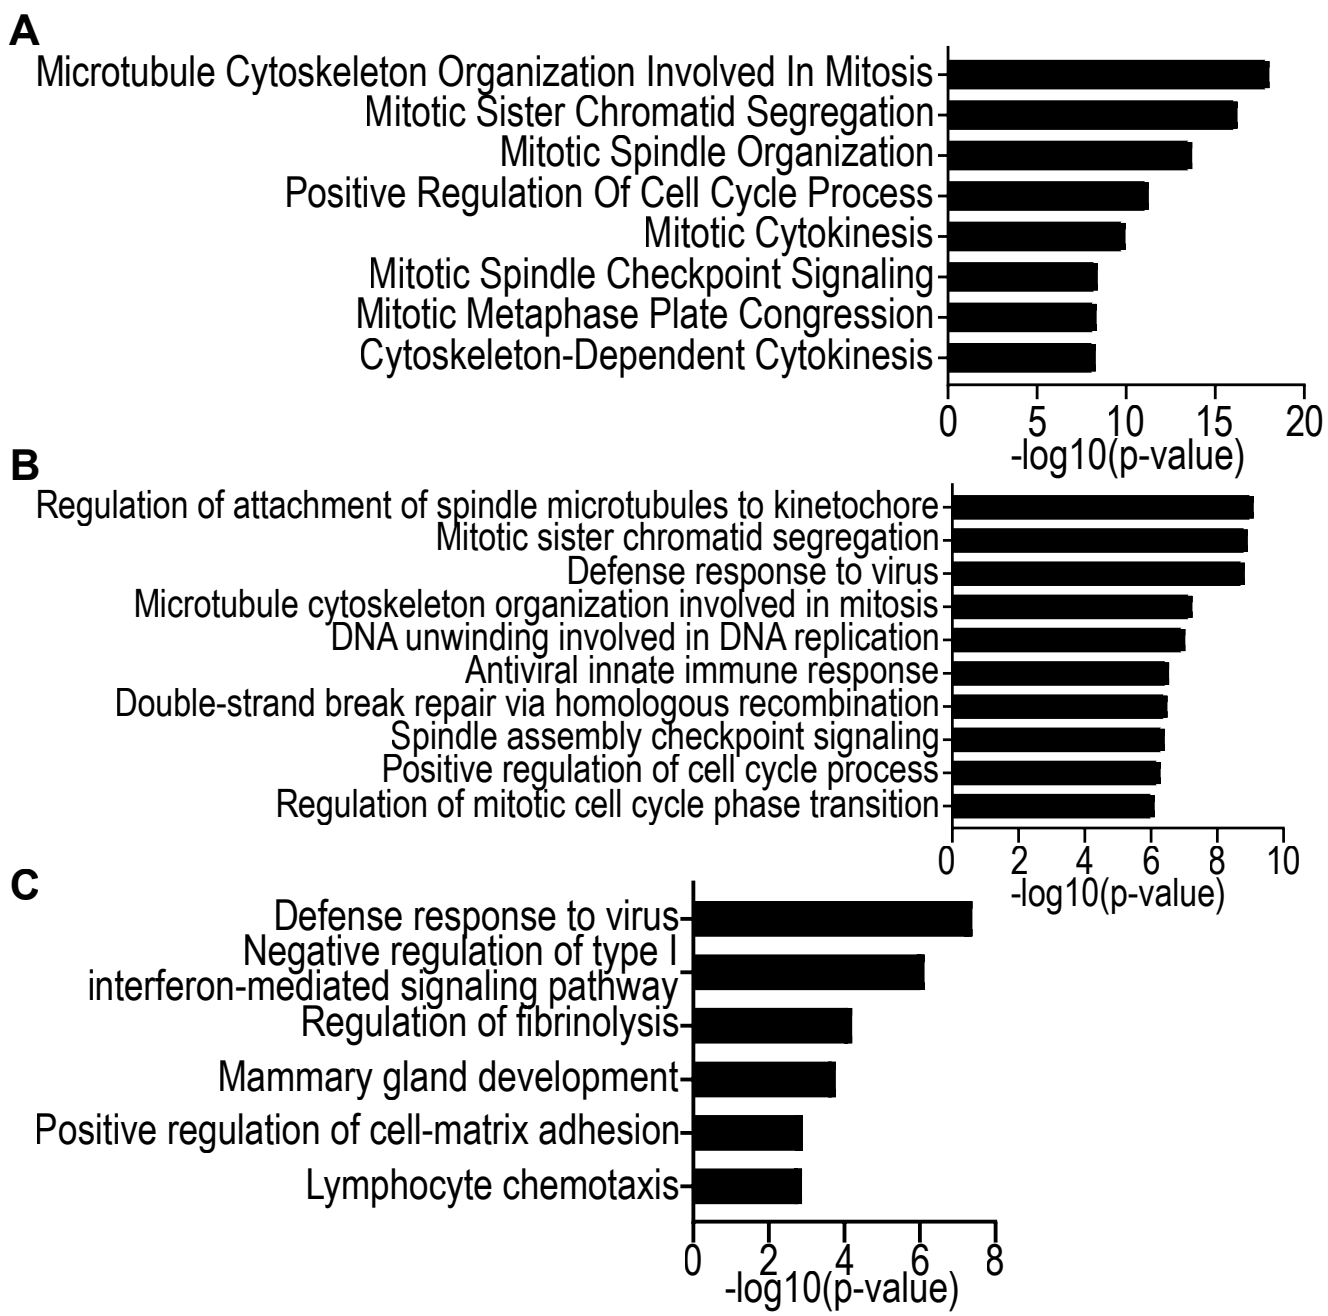

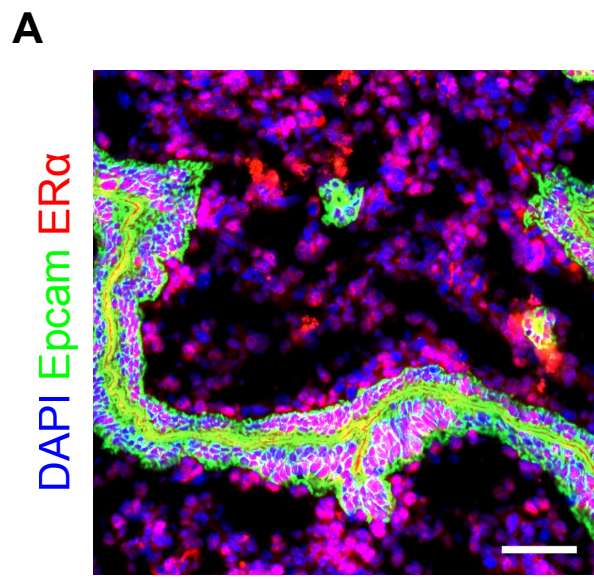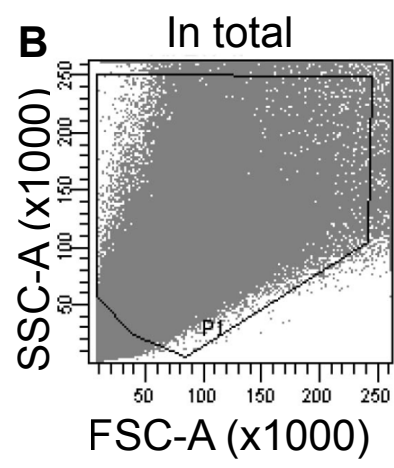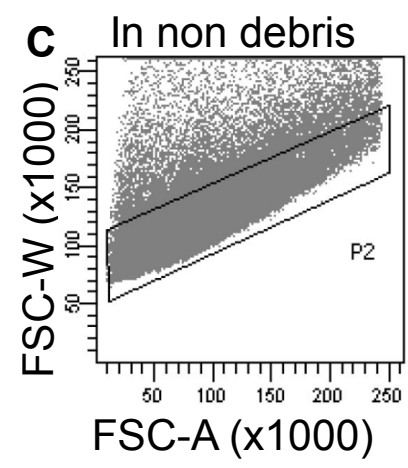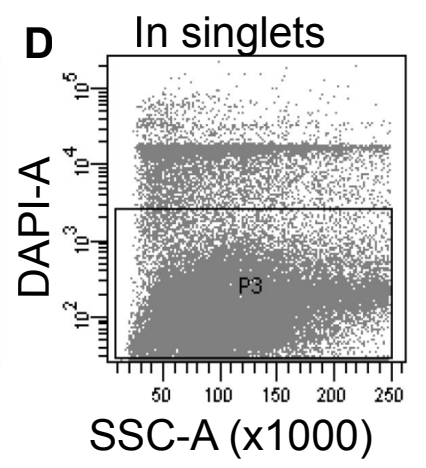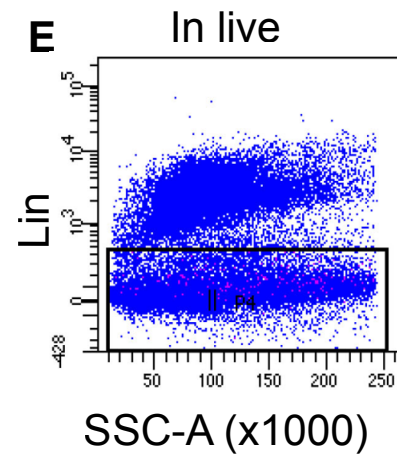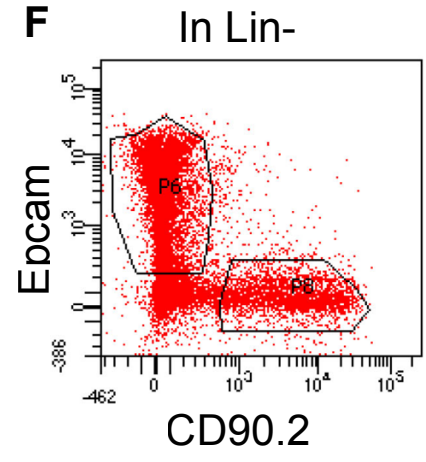

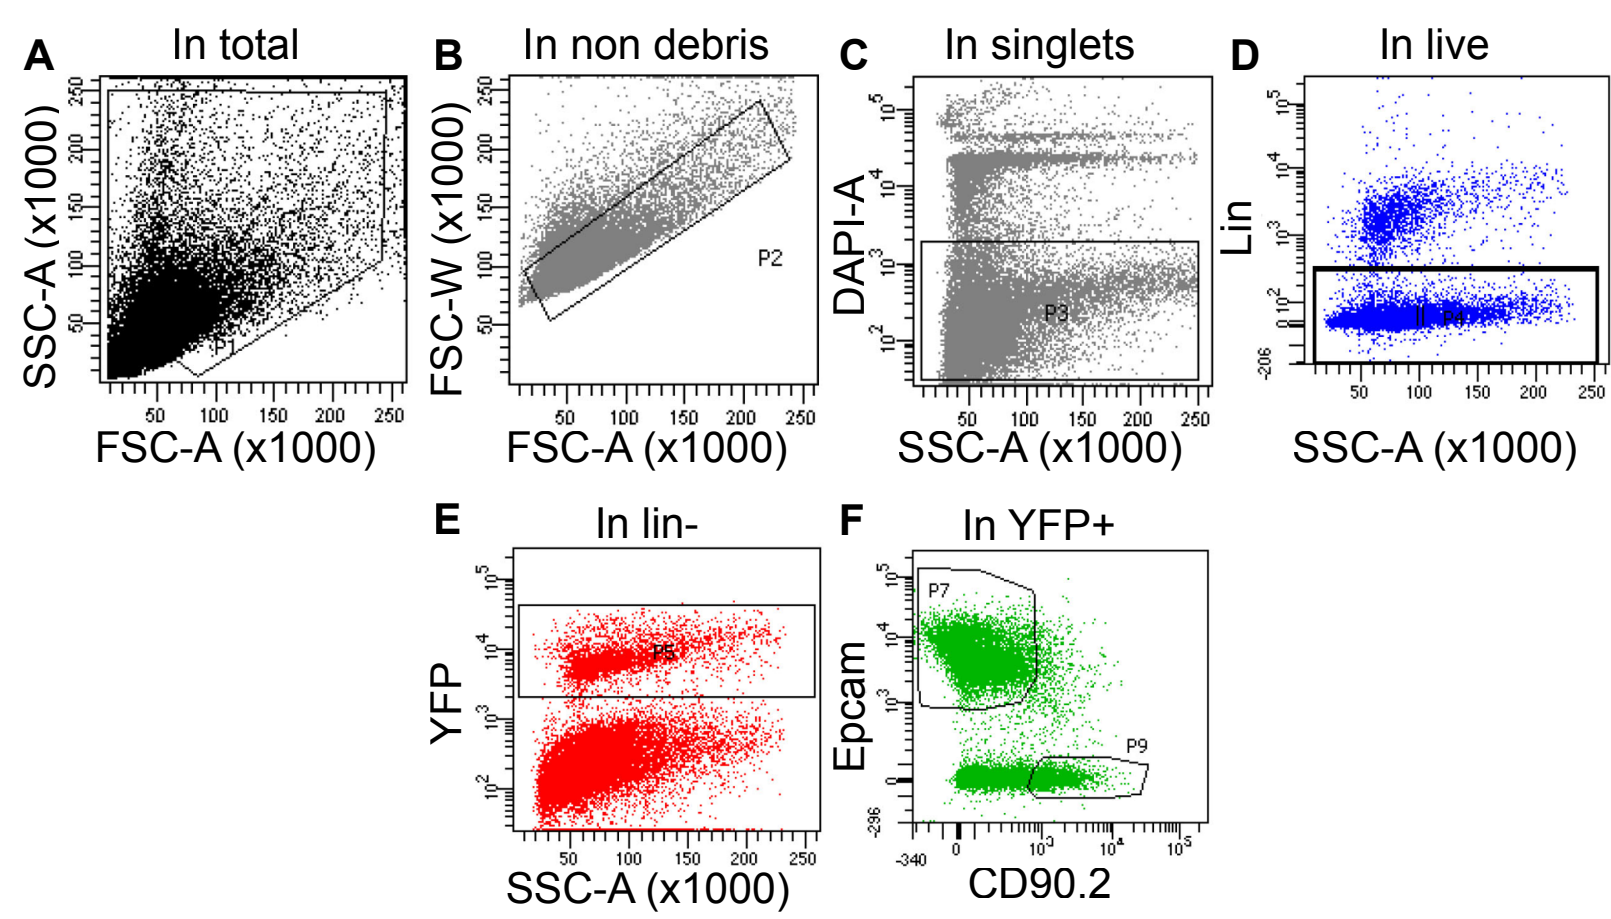

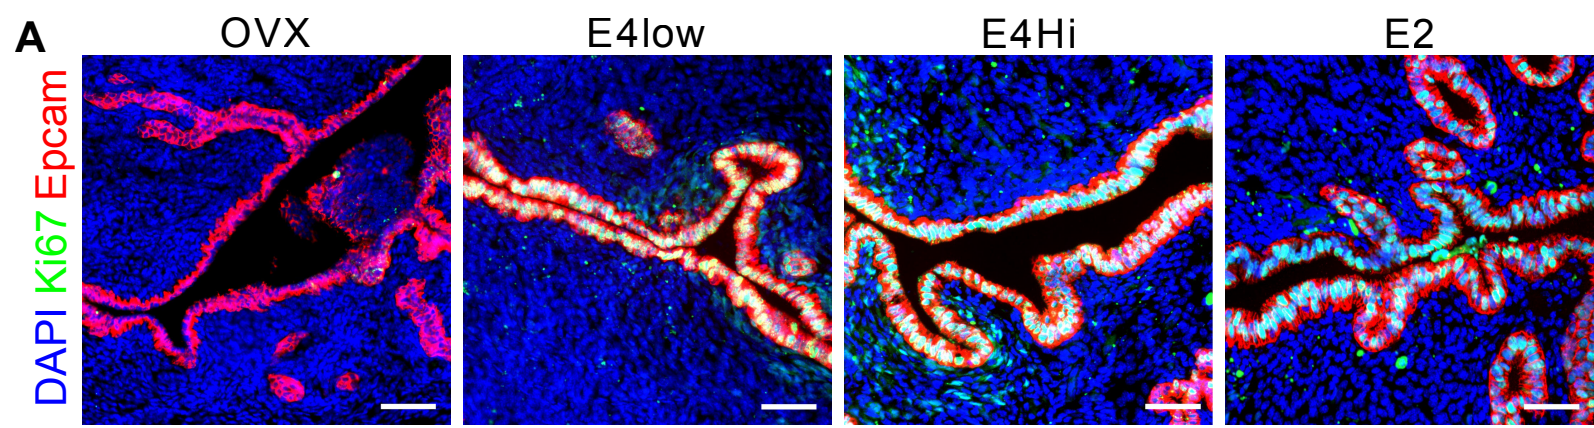

Supplement: Supplementary file 1 [file 8b6dc2ca337da418a93bca86.pdf]
